# Supplementary material
Source: ML conference proceedings conference paper supplement (https://openreview.net/forum?id=8mM5NzC7da)
Supplement: supplementary_material [file attachment]

## Sheet: Sheet
Questions	Answers
A publishing company has 240 books on a shelf, 60 of which are fiction and the rest are non-fiction. If 30 non-fiction books are removed, what fraction of non-fiction books are removed?	We start by finding the number of non-fiction books initially. 240 - 60 = 180 non-fiction books. Since 30 are removed, we find 30 / 180 = 1 / 6 of non-fiction books are removed. #### 1/6
A technology firm makes 350 electronic devices daily. Each device costs $40. How much money does the technology firm make in a day?	Since 350 devices are made, and each costs $40, the firm makes 350 x 40 = 14,000 dollars daily. #### 14000
What is the probability of rolling a 5 on a fair six-sided die in three consecutive rolls?	The probability of rolling a 5 in one roll is 1 / 6. Since this is an independent event, we find the probability of rolling a 5 in three consecutive rolls by multiplying. 1 / 6 x 1 / 6 x 1 / 6 = 1 / 216. #### 1/216
A rectangle has two sides measuring 8 cm and 12 cm. What is the length of the diagonal?	Using the Pythagorean theorem, a^2 + b^2 = c^2, we plug in our values. 8^2 + 12^2 = c^2, so 64 + 144 = c^2. Solving for c, we find c = sqrt(208) = 4*sqrt(13). #### 4*sqrt(13)
What is the mean of the dataset 1, 3, 5, 7, 9?	To find the mean, we add the data points and divide by the number of data points. 1 + 3 + 5 + 7 + 9 = 25. Dividing by 5, we get 25 / 5 = 5. #### 5
A fair eight-sided die is rolled five times. What is the probability that exactly three of the rolls result in a 5?	First, the probability of exactly three of the rolls resulting in a 5 is (1/8)^3. Second, the probability of the remaining two rolls not resulting in a 5 is (7/8)^2. Finally, the number of ways to arrange three 5s and two non-5s is 10. So, the probability is (1/8)^3 * (7/8)^2 * 10 = 0.2734375. #### 0.2734375
A man can mow a lawn in 7 hours and a woman can mow the same lawn in 5 hours. If they work together, how many hours will it take to mow the lawn?	Let's first find the total work done by the man and the woman in one hour. The man can do 1/7 of the work in one hour, and the woman can do 1/5 of the work in one hour. So, together they can do 1/7 + 1/5 = 12/35 of the work in one hour. To find the time it takes to complete the work, we divide 1 by 12/35. So, the time is 35/12 = 2.9167 hours. #### 2.9167
In a right triangle, the length of the hypotenuse is 7 inches and one side is 4 inches. What is the length of the other side?	We can use the Pythagorean theorem, which is a^2 + b^2 = c^2, where a and b are the lengths of the sides and c is the length of the hypotenuse. Let's denote the length of the other side as x. Then, we have 4^2 + x^2 = 7^2. Simplifying, we get 16 + x^2 = 49. Subtracting 16 from both sides, we get x^2 = 33. Taking the square root of both sides, we get x = sqrt(33). #### 5.744
If it takes 8 hours to fill a tank, how many hours will it take to fill 3 such tanks?	If it takes 8 hours to fill one tank, it will take 8 * 3 = 24 hours to fill three tanks. #### 24
The area of a parallelogram is 48 and its height is 6. What is its base?	We can use the formula for the area of a parallelogram, which is A = bh, where b is the base and h is the height. Let's denote the base as x. Then, we have 48 = 6x. Dividing both sides by 6, we get x = 8. #### 8
A bookstore sells a total of 240 books on a certain day. The number of fiction books sold is 40 more than the number of non-fiction books sold. How many non-fiction books were sold on that day?	Let's say the number of non-fiction books sold is x. Then, the number of fiction books sold is x + 40. The total number of books sold is 240, so we can set up the equation x + (x + 40) = 240. Simplifying the equation, we get 2x + 40 = 240. Subtracting 40 from both sides, we get 2x = 200. Dividing both sides by 2, we get x = 100. #### 100
A factory produces 48 boxes of candy per hour. If the factory operates for 6 hours, how many boxes of candy will it produce?	The factory produces 48 boxes of candy per hour and operates for 6 hours. To find the total number of boxes of candy produced, we can multiply the number of boxes produced per hour by the number of hours. So, we get 48 * 6 = 288. #### 288
A car travels from City A to City B at an average speed of 40 km/h and returns at an average speed of 60 km/h. What is the average speed for the round trip?	Let's say the distance between City A and City B is x km. The time taken to travel from City A to City B is x / 40 hours, and the time taken to return is x / 60 hours. The total time taken is x / 40 + x / 60 hours. The total distance traveled is 2x km. The average speed for the round trip is the total distance divided by the total time, which is 2x / (x / 40 + x / 60). Simplifying the expression,…
A student has 18 pencils in her pencil case. She gives 2 pencils to her friend and buys 4 more pencils. How many pencils does she have now?	The student had 18 pencils initially. She gave 2 pencils to her friend, so she had 18 - 2 = 16 pencils left. Then, she bought 4 more pencils, so she now has 16 + 4 = 20 pencils. #### 20
What is the value of x if 2x - 3 = 11?	To solve for x, we can add 3 to both sides of the equation, which gives us 2x = 11 + 3. Simplifying the right-hand side, we get 2x = 14. Dividing both sides by 2, we get x = 14 / 2 = 7. #### 7
Tom has 7 groups of 4 basketballs in his sports bag. How many basketballs does Tom have in total?	To find the total number of basketballs, we multiply the number of groups by the number of basketballs in each group. So, 7 x 4 = 28. #### 28
What is the sum of all possible prime factors of the number 240?	The prime factors of 240 are 2, 2, 2, 2, 3, and 5. So, we add these prime factors: 2 + 2 + 2 + 2 + 3 + 5 = 16. #### 16
Emily has 15 boxes of crayons with 24 crayons in each box. How many crayons does Emily have in total?	To find the total number of crayons, we multiply the number of boxes by the number of crayons in each box. So, 15 x 24 = 360. #### 360
What is the value of x in the equation 3x - 2 = 14?	To solve for x, we first add 2 to both sides: 3x = 16. Then, we divide both sides by 3: x = 16 / 3. x = 5.33. #### 5.33
A shirt is on sale for 20 percent off its original price of 180. How much will you pay for the shirt?	To find the discount, we calculate 20% of 180: 0.20 x 180 = 36. Then, we subtract the discount from the original price: 180 - 36 = 144. #### 144
What is the slope of a line that passes through the points (2, 3) and (4, 5)?	To find the slope, we need to use the formula (y2 - y1) / (x2 - x1), where (x1, y1) = (2, 3) and (x2, y2) = (4, 5). Plug in the values, we get (5 - 3) / (4 - 2) = 2 / 2 = 1. #### 1
A rectangular garden has a length of 20 meters and a width of 15 meters. What is its perimeter?	The formula for the perimeter of a rectangle is 2(length + width). Plug in the values, we get 2(20 + 15) = 2(35) = 70. #### 70
A car rental company has a total of 150 cars, 40 of which are luxury cars. If they rent out 20 luxury cars and 30 non-luxury cars, what fraction of the total cars are rented out?	Let's first find the total number of cars rented out, which is 20 + 30 = 50. Now, divide the total number of cars rented out by the total number of cars, we get 50 / 150 = 1 / 3. #### 1/3
A student scored 80, 70, and 90 on three maths tests. What is the student's average score?	To find the average, add up all the scores and divide by the number of tests. We get (80 + 70 + 90) / 3 = 240 / 3 = 80. #### 80
A company claims that 60% of their employees are under 30 years old. If they have 200 employees, how many employees are under 30 years old?	Convert the percentage to a decimal by dividing by 100, we get 0.6. Multiply this decimal by the total number of employees, we get 0.6 x 200 = 120. #### 120
What is the average score of a class when 5 students scored 70, 7 students scored 80, and 8 students scored 90?	Calculate the total score by multiplying each score by the number of students who scored it: (5 x 70) + (7 x 80) + (8 x 90) = 350 + 560 + 720 = 1630. Calculate the total number of students: 5 + 7 + 8 = 20. Calculate the average score: 1630 / 20 = 81.5. #### 81.5
Tom has {} dollars in his wallet. He gives {} dollars to his sister. What fraction of his original balance did he give to his sister?	Write a fraction with the amount given to his sister on top and the original balance on the bottom. If Tom has 20 dollars in his wallet and gives 4 dollars to his sister, the fraction would be 4/20, which can be simplified to 1/5. #### 0.2
A car rental agency charges {} dollars per day for the first {} days, and then {} dollars per day for additional days. How much would it cost to rent a car for {} days?	Calculate the cost for the first {} days: {} dollars per day x {} days = {} dollars. Calculate the cost for the additional days: {} dollars per day x ({} - {}) days = {} dollars. Calculate the total cost: {} dollars + {} dollars. If the agency charges 40 dollars per day for the first 3 days, and then 30 dollars per day for additional days, it would cost: (40 x 3) + (30 x 2) = 120 + 60 = 180 dolla…
A bookstore has a sale of 15% off all books. If a book originally costs {} dollars, how much would it cost during the sale?	Calculate the discount by multiplying the original cost by the discount percentage: {} dollars x 0.15 = {} dollars. Calculate the sale price by subtracting the discount from the original cost: {} dollars - {} dollars. If a book originally costs 80 dollars, it would cost: 80 - (80 x 0.15) = 80 - 12 = 68 dollars during the sale. #### 68
A factory produces {} units of a product per hour. If the factory operates for {} hours per day, how many units would it produce in {} days?	Calculate the number of units produced per day by multiplying the number of units produced per hour by the number of hours per day: {} units/hour x {} hours/day = {} units/day. Calculate the total number of units produced in {} days by multiplying the number of units produced per day by the number of days: {} units/day x {} days. If the factory produces 50 units per hour and operates for 8 hours …
A football team has won 25 games and lost 15 games. What fraction of their games has the team won?	To find the fraction of games won, we divide the number of games won by the total number of games played. Therefore, the fraction of games won is 25 / (25 + 15) = 25 / 40 = 5 / 8. #### 5/8
A restaurant has 180 chairs and it can accommodate 30 people per table. If each table has 4 chairs, how many tables are there in the restaurant?	First, we find the number of chairs per table, which is 4. Then, we divide the total number of chairs by the number of chairs per table to get the total number of tables. Therefore, the number of tables is 180 / 4 = 45. #### 45
A cylindrical tank has a height of 10 meters and a radius of 5 meters. What is the volume of the tank?	The formula to find the volume of a cylinder is V = πr^2h. Plugging in the values, we get V = π(5)^2(10) = 250π. #### 250π
A store is having a sale on shirts. If the original price of a shirt is 30 dollars and it is discounted by 25%, how much will you have to pay for the shirt?	The discount is 25% of the original price, which is 0.25 * 30 = 7.50 dollars. Therefore, you will have to pay 30 - 7.50 = 22.50 dollars. #### 22.50
A car traveled from city A to city B at an average speed of 60 kilometers per hour. If the distance between the two cities is 300 kilometers, how long did it take for the car to travel from city A to city B?	To find the time taken, we divide the distance by the average speed. Therefore, the time taken is 300 / 60 = 5 hours. #### 5
There are 14 boxes of crayons in a storage room. Each box contains 12 bags of crayons. If each bag contains 8 crayons, how many crayons are there in total?	First, we need to find the total number of bags of crayons, which is 14 boxes * 12 bags per box = 168 bags. Next, we need to find the total number of crayons, which is 168 bags * 8 crayons per bag = 1344. #### 1344
A rectangular garden measures 15 meters by 9 meters. A fence is built around its perimeter. If the fence costs $8 per meter, what is the total cost of the fence?	First, we need to find the perimeter of the garden, which is 2(length + width) = 2(15 + 9) = 48 meters. Next, we need to find the total cost of the fence, which is 48 meters * $8 per meter = $384. #### 384
A bag contains 18 red marbles, 12 blue marbles, and 10 green marbles. What is the probability of randomly selecting a blue marble?	First, we need to find the total number of marbles, which is 18 + 12 + 10 = 40. Next, we need to find the probability of selecting a blue marble, which is 12 blue marbles / 40 total marbles = 0.3. #### 0.3
A car travels 240 miles in 4 hours. How many miles does it travel per hour?	First, we need to find the distance traveled per hour, which is 240 miles / 4 hours = 60 miles per hour. #### 60
A pizza parlor sells large pizzas for $15 each and small pizzas for $10 each. If they sell 12 large pizzas and 8 small pizzas, how much money do they make in total?	First, we need to find the total amount made from large pizzas, which is 12 pizzas * $15 per pizza = $180. Next, we need to find the total amount made from small pizzas, which is 8 pizzas * $10 per pizza = $80. Finally, we add the amounts made from both types of pizzas to get the total amount, which is $180 + $80 = $260. #### 260
A group of hikers want to share some snacks equally. If they have 36 energy bars and there are 6 people, how many energy bars will each person get?	6 energy bars are divided into 6 equal groups. So, each group has 36 / 6 = 6 energy bars. #### 6
What is the probability that a 4-sided die lands on an odd number if it is rolled 4 times?	The probability of getting an odd number on a 4-sided die is 2 / 4 = 1 / 2. So, the probability of getting an odd number in 4 trials is (1 / 2) ^ 4 = 1 / 16. #### 1/16
What is the probability of obtaining at least one king when drawing two cards from a deck of 52 cards?	The probability of drawing a king in one draw is 4 / 52 = 1 / 13. The probability of drawing a king in the second draw given that a king was drawn in the first draw is 3 / 51. The probability of obtaining at least one king is 1 - (probability of not drawing a king in both draws) = 1 - (1 - 1 / 13) * (1 - 3 / 51) = 247 / 663. #### 247/663
The volume of a spherical tank is 288 cubic feet. If the radius of the tank is 6 feet, what is the surface area of the tank?	The formula for the volume of a sphere is V = 4 / 3 * pi * r ^ 3, where r is the radius. So, 288 = 4 / 3 * pi * 6 ^ 3. The formula for the surface area of a sphere is A = 4 * pi * r ^ 2. Plugging in r = 6, we get A = 4 * pi * 6 ^ 2 = 144 * pi. #### 144*pi
In a right triangle, the length of the hypotenuse is 7 and one of the legs is 4. What is the length of the other leg?	Use Pythagorean theorem, a ^ 2 + b ^ 2 = c ^ 2, where a and b are the legs, and c is the hypotenuse. So, a ^ 2 + 4 ^ 2 = 7 ^ 2, a ^ 2 = 49 - 16 = 33. a = sqrt(33). #### sqrt(33)
A train travels from city X to city Y at an average speed of 80 km/h and returns at an average speed of 50 km/h. What is the average speed of the train for the entire trip?	Let's assume the total distance between city X and city Y is d. Since the train travels the same distance in both directions, the total distance traveled is 2d. The total time taken for the entire trip is (d / 80) + (d / 50) = (5d / 400) + (8d / 400) = 13d / 400. Now, the average speed of the train for the entire trip is the total distance divided by the total time taken, which is (2d) / (13d / 4…
Miriam has 180 dollars to buy 6 identical toys. If each toy costs 25 dollars, how much money will Miriam have left?	Miriam spends 6 x 25 = 150 dollars on the toys. So, she is left with 180 - 150 = 30 dollars. #### 30
A rabbit is at the bottom of a 30-foot hole. Each day, it climbs up 5 feet, but at night, it slips back 2 feet. How many days will it take for the rabbit to reach the top of the hole?	The rabbit climbs 5 - 2 = 3 feet each day. So, it will take 30 / 3 = 10 days for the rabbit to reach the top of the hole. #### 10
A cube has a side length of 8 cm. What is the volume of the cube?	The volume of the cube is the cube of the side length, which is 8^3 = 8 x 8 x 8 = 512. #### 512
What is the surface area of a cylinder that is 5 inches tall and has a radius of 3 inches?	The surface area of the cylinder is 2 * pi * r * (r + h), where r is the radius and h is the height. Plugging in the values, we get 2 * pi * 3 * (3 + 5) = 2 * pi * 3 * 8 = 48 * pi = 150.796. #### 151
In a triangle, the longest side is 15 inches and one side is 9 inches. If the angle opposite the longest side is 90 degrees, what is the length of the third side?	In a right triangle, we can use pythagorean theorem. Let's say x is the third side. x^2 + 9^2 = 15^2 . x^2 + 81 = 225 . x^2 = 144 . x = 12 . So the length of the third side is 12 inches. #### 12
A group of friends want to share some candies in the ratio 2:3:7. If they have 240 candies, how many candies will the friend with the highest share get?	To find the friend with the highest share, we add up the ratios (2+3+7 = 12) and calculate what part of the total each ratio represents. For the highest share of 7, we have 240 * 7/12 = 140. So the friend with the highest share gets 140 candies. #### 140
In the figure, DE is a straight line and angle F is 37 degrees. What is the measure of angle G?	Since DE is a straight line, angle F and angle G are supplementary, which means that they add up to 180 degrees. So angle G = 180 - angle F = 180 - 37 = 143. So the measure of angle G is 143 degrees. #### 143
The perimeter of a rectangle is 36 inches. If the width is 4 inches less than the length, what are the dimensions of the rectangle?	Let's say x is the length and x-4 is the width. The perimeter of a rectangle is 2 (length + width), so we have, 2(x + x-4) = 36. Expanding and simplifying we get, 2x + 2x - 8 = 36, 4x - 8 = 36, 4x = 44, x = 11. So the length is 11 inches and the width is 11 - 4 = 7 inches. The dimensions are 11 inches and 7 inches. #### 11, 7
Andrew has 45 stamps in his album originally. He buys 36 more packets, each containing 4 new stamps. How many stamps will Andrew have in his album after buying these packets?	Andrew originally had 45 stamps. He buys 36 packets, each with 4 new stamps, so he gets 36 * 4 = 144 new stamps. In total, Andrew will have 144 + 45 = 189 stamps. #### 189
Tom can paint 18 walls in 3 hours. How many walls can he paint in 5 hours?	Let's find the number of walls Tom paints per hour. That is 18/3 = 6 walls per hour. Then, multiply the rate by 5 hours to get 6 * 5 = 30 walls. #### 30
A bookshelf has 15 shelves and each shelf can hold 4 books. If the bookshelf is currently empty, how many books can be placed in it?	Multiply the number of shelves by the number of books each shelf can hold to get 15 * 4 = 60 books. #### 60
Tim has 50 stickers. He gives 7 to Mary, 5 to Billy, and 3 to John. How many stickers does Tim have left?	First, find the total number of stickers given away: 7 + 5 + 3 = 15. Then, subtract the total from the initial amount to get 50 - 15 = 35. #### 35
A snail is at the bottom of a 20-foot well. Each day, it climbs up 3 feet, but at night, it slips back 2 feet. How many days will it take for the snail to reach the top?	The snail climbs 3 - 2 = 1 foot each day. Divide the height by the daily progress to get 20/1 = 20 days. #### 20
A store sells 180 shirts at $15 each and 120 pants at $20 each. How much money did the store make in total?	Find the total sales from shirts: 180 * 15 = 2700. Find the total sales from pants: 120 * 20 = 2400. Then, add the two amounts to get 2700 + 2400 = 5100. #### 5100
A rectangular garden has an area of 144 square meters. If the length is 12 meters more than the width, what is the width of the garden?	Let the width be x meters. The length is x + 12. The area is 144, so x(x+12) = 144. Expanding, x^2 + 12x = 144. Rearranging, x^2 + 12x - 144 = 0. Factoring, (x + 18)(x - 8) = 0. Solving, x = -18 ( rejected, since width cannot be negative) or x = 8. The width is 8. #### 8
A bakery is making a special promotion of cookies at $5 per dozen. If Sara buys 24 cookies, how much will she pay in total?	Sara buys 24 cookies, which is 2 dozens. The price per dozen is $5, so she will pay 2 x $5 = $10. #### 10
A car travels from City A to City B at an average speed of 75 km/h and returns at an average speed of 50 km/h. What is the average speed for the whole trip?	Suppose the distance between the cities is x. Then the time taken to travel from City A to City B is x/75 hours, and the time taken to travel from City B to City A is x/50 hours. The total time is x/75 + x/50. The total distance is 2x. The average speed is 2x / (x/75 + x/50). Solving, we get the average speed as 60 km/h. #### 60
In a set of 60 students, 45 speak Spanish, 30 speak English, and 15 speak both languages. What is the probability that a student speaks at least one language?	The number of students who speak at least one language is 45 + 30 - 15 = 60. The total number of students is 60. The probability is 60/60 = 1. #### 1
What is the value of y in the equation 3y - 2 = 14?	Add 2 to both sides, 3y = 14 + 2, 3y = 16. Divide both sides by 3, y = 16/3, y = 5.33. #### 5.33
What is the length of the hypotenuse of a right-angled triangle with legs of 3 centimeters and 4 centimeters?	Using the Pythagorean theorem, the length of the hypotenuse is sqrt(3^2 + 4^2) which is sqrt(9 + 16) = sqrt(25) = 5 ####
In a school, the ratio of students to teachers is 8:3. If there are 48 teachers, how many students are there?	Since the ratio of students to teachers is 8:3, the number of students is 8/3 times the number of teachers. So, the number of students is (8/3) x 48 = 8 x 16 = 128 ####
In a basket, there are 15 apples, of which 9 are red. What is the probability that a randomly picked apple is not red?	The probability of picking a red apple is 9/15. Therefore, the probability of picking a non-red apple is 1 - (9/15) = (6/15) = 0.4 ####
What is the value of y in the equation: 3y - 2 = 7?	To solve for y, add 2 to both sides of the equation, which gives 3y = 9. Then, divide both sides by 3, which gives y = 9/3 = 3 ####
What is the area of a triangle with a base of 5 centimeters and a height of 6 centimeters?	The area of the triangle is (1/2) x base x height = (1/2) x 5 x 6 = 15 ####
Jake has 21 pencils, and he wants to put an equal amount in each of 3 pencil cases. How many pencils will he put in each pencil case?	To find out how many pencils Jake will put in each case, we divide 21 by 3. 21 ÷ 3 = 7. ####7
A bakery wants to package 54 cookies into boxes that hold 9 cookies each. How many boxes can they fill?	To find out how many boxes the bakery can fill, we divide 54 by 9. 54 ÷ 9 = 6. ####6
A deck of cards has 16 hearts, 12 diamonds, and 12 clubs. What is the probability of randomly selecting a heart?	There are 16 hearts out of a total of 16 + 12 + 12 = 40 cards. The probability of selecting a heart is 16/40, which reduces to 2/5. ####2/5
A group of friends want to share some snacks in the ratio 2:3:5. If they have 300 snacks, how many snacks will the friend with the highest share get?	The highest share is 5 parts. The total number of parts is 2 + 3 + 5 = 10. The friend with the highest share will get (300 x 5)/10 = 150 snacks. ####150
A cyclist travels from Town A to Town B at an average speed of 30 km/h and returns at an average speed of 45 km/h. What is the average speed of the cyclist for the round trip?	Let's assume the distance between the towns is x km. The total time for the trip is x/30 + x/45 = (3x+2x)/(90) = 5x/90 hours. The total distance is 2x km. The average speed is (2x) / (5x/90) = (2x) * (90/5x) = 36 km/h. ####36
What is the probability of drawing a king from a standard deck of 52 playing cards in three consecutive draws?	Since there are 4 kings in a standard deck of 52 playing cards, the probability of drawing a king in the first draw is 4/52. Assuming that we do not replace the drawn card, the probability of drawing a king in the second draw is 3/51 and in the third draw is 2/50. Therefore, the probability of drawing a king in three consecutive draws is (4/52 × 3/51 × 2/50) = 24/132600. So, the probability is 24…
A bookstore is stocking up on bestsellers for the holiday season. They need to package 120 books into boxes that hold 4 books each. How many boxes will they need?	To find the number of boxes needed, we will divide the total number of books (120) by the number of books that each box can hold (4). Therefore, the number of boxes needed is 120 ÷ 4 = 30. #### 30
What is the median of the dataset 3, 5, 7, 9, 11?	To find the median, we need to arrange the dataset in ascending order, which is 3, 5, 7, 9, 11. Since there are an odd number of data points, the middle value is the median. Therefore, the median of the dataset is 7. #### 7
A factory is producing a special batch of toys for the holiday season. They need to package 432 toys into boxes that hold 9 toys each. How many boxes will they need?	To find the number of boxes needed, we will divide the total number of toys (432) by the number of toys that each box can hold (9). Therefore, the number of boxes needed is 432 ÷ 9 = 48. #### 48
What is the probability of rolling an odd number on a fair six-sided die in two consecutive rolls?	The probability of rolling an odd number on a fair six-sided die is 3/6, since there are 3 odd numbers (1, 3, and 5) out of a total of 6 possible outcomes. The probability of rolling an odd number in two consecutive rolls is therefore (3/6 × 3/6) = 9/36. So, the probability is 9/36. #### 9/36
A library receives 18 new books. If they already had 40 books, what is the probability that a randomly selected book from their collection is one of the new books?	First, find the total number of books. 18 new books + 40 existing books = 58 total books. Then, find the probability of a new book being selected. There are 18 new books and 58 total books, so the probability is 18/58 = 9/29. #### 9/29
The circumference of a circle is 12π inches. If the radius is r, what is the value of r?	The formula to find the circumference is C = 2πr. Plug in 12π for C and solve for r. 12π = 2πr. Divide both sides by 2π. r = 12π / 2π = 6. #### 6
A store sells 180 widgets at $5 each and 80 gadgets at $8 each. What is the total amount of money the store receives in a day?	The store sells 180 widgets at $5 each, so they receive 180 x $5 = $900 from the widgets. The store also sells 80 gadgets at $8 each, so they receive 80 x $8 = $640 from the gadgets. Add the money received from both items. $900 + $640 = $1540. #### 1540
In a group of 20 people, 12 people can swim and 8 people can bike. If 3 people can do both, how many people can do at least one of the activities?	First, find the number of people who can do exactly one activity. There are 12 people who can swim, but 3 of them can also bike, so the number of people who can only swim is 12 - 3 = 9. There are 8 people who can bike, but 3 of them can also swim, so the number of people who can only bike is 8 - 3 = 5. Add the number of people who can do exactly one activity to the number of people who can do bot…
A triangle has angles of 30°, 50°, and x. What is the value of x?	The sum of the angles in a triangle is 180°. Set up the equation 30° + 50° + x = 180°. Combine the constants on the left side. 80° + x = 180°. Subtract 80° from both sides. x = 180° - 80° = 100°. #### 100
In a group of 12 students, the number of ways to select a committee of 4 students is?	Step 1: Use the combination formula: C(n,r) = n! / (r!(n-r)!). Step 2: Plug in the values n = 12 and r = 4. Step 3: Calculate the result: C(12,4) = 12! / (4!(12-4)!) = 12! / (4!8!) = 495. #### 495
What is the length of the hypotenuse of a right-angled triangle with legs of length 5 cm and 12 cm?	Step 1: Use the Pythagorean theorem: a^2 + b^2 = c^2. Step 2: Plug in the values a = 5 and b = 12. Step 3: Calculate the result: c^2 = 5^2 + 12^2 = 25 + 144 = 169. Step 4: Find the square root of c^2: c = √169 = 13. #### 13
The area of a rectangle is 40 square inches. If the length is 6 inches more than the width, what are the dimensions of the rectangle?	Step 1: Let the width be x inches. Step 2: The length is x + 6 inches. Step 3: The area is given as 40 square inches, so x(x+6) = 40. Step 4: Solve for x: x^2 + 6x - 40 = 0 => x = 4 or x = -10. Step 5: Reject the negative solution. Step 6: The width is 4 inches, and the length is 4 + 6 = 10 inches. #### 4, 10
What is the median of the following set of data?	Step 1: Arrange the data in order: 3, 5, 6, 9, 12. Step 2: Since there are an odd number of values, the median is the middle value: 6. #### 6
The area of a parallelogram is 48 and its height is 8. What is its base?	Step 1: Use the formula: Area = base * height. Step 2: Plug in the values Area = 48 and height = 8. Step 3: Solve for base: base = Area / height = 48 / 8 = 6. #### 6
A company has 5000 employees, and 25% of them own a car. How many employees own a car?	The percentage of employees who own a car is 25%, so the number of employees who own a car is 25% of 5000 = 0.25 x 5000 = 1250. #### 1250
What is the sum of all possible prime factors of the number 210?	The prime factors of 210 are 2, 3, 5, and 7. Summing them gives 2 + 3 + 5 + 7 = 17. #### 17
A warehouse has 10 containers of identical dimensions. Each container contains 20 crates and each crate contains 12 bags of cement. If the warehouse wants to pack 8 bags of cement in a new container, how many new containers are required?	There are 10 containers, each containing 20 crates, each containing 12 bags. In total, there are 10 x 20 x 12 = 2400 bags. Dividing this by 8 bags per container gives the number of new containers required, 2400 / 8 = 300. #### 300
A library has 10 shelves, and each shelf can hold 20 books. If the library is currently empty, how many books can be placed on it in total?	There are 10 shelves, each holding 20 books. So in total, 10 x 20 = 200 books can be placed. #### 200
A TV set is on sale for 20 percent off its original price of 400. How much will you pay for the TV set?	The discount is 20% of 400, which is 0.20 x 400 = 80. Taking this off the original price gives 400 - 80 = 320. #### 320
A factory produces 4500 toys in 5 days. How many toys does it produce in a day?	To find the number of toys produced in a day, we will divide the total number of toys produced in 5 days by 5. So, 4500 ÷ 5 = 900. #### 900
A bakery sells 240 loaves of bread in 4 hours. How many loaves of bread does it sell in an hour?	To find the number of loaves of bread sold in an hour, we will divide the total number of loaves of bread sold in 4 hours by 4. So, 240 ÷ 4 = 60. #### 60
The cost of a book is $25 and the cost of a pencil is$0.5. If a person buys 5 books and 10 pencils, how much will they pay in total?	To find the total cost, we will first find the cost of 5 books and 10 pencils separately. The cost of 5 books is 5 x $25 =$125. The cost of 10 pencils is 10 x $0.5 =$5. Now, we will add the two costs together. So, $125 +$5 = $130. #### 130
A water tank can hold 3600 liters of water. If 2400 liters of water is already filled in it, how much more water can be filled?	To find the remaining capacity of the tank, we will subtract the amount of water already filled from the total capacity. So, 3600 - 2400 = 1200. #### 1200
A book has 240 pages. If a person reads 40 pages on day 1 and 50 pages on day 2, how many pages are left to read?	To find the number of pages left to read, we will first find the total number of pages read. The total number of pages read is 40 + 50 = 90. Now, we will subtract the total number of pages read from the total number of pages in the book. So, 240 - 90 = 150. #### 150
The average of 3 numbers is 10. If the smallest number is 5, what is the sum of the other 2 numbers?	Let x and y be the other two numbers. The average of 3 numbers is 10, so (x + y + 5) / 3 = 10. Multiplying both sides by 3 yields x + y + 5 = 30. Subtracting 5 from both sides yields x + y = 25. #### 25
A group of friends want to share 36 cookies equally. How many cookies will each friend get if there are 6 friends?	Divide the total number of cookies by the number of friends. 36 / 6 = 6. #### 6
A table can be assembled in 8 hours by a skilled worker. If an unskilled worker takes 2 hours longer to assemble the table, how long does it take the unskilled worker to assemble the table?	If the skilled worker takes 8 hours to assemble the table, the unskilled worker takes 8 + 2 = 10 hours to assemble the table. #### 10
A total of 18 books are on a shelf, and 12 of them are fiction. What is the probability that a randomly selected book from the shelf is a fiction book?	The total number of books is 18, and 12 of them are fiction. The probability of selecting a fiction book is the number of fiction books divided by the total number of books, which is 12 / 18 = 2 / 3. #### 2/3
If Sam can mow a lawn in 4 hours, and Rachel can mow the same lawn in 6 hours, how long will it take for them to mow the lawn together?	Let's first find the rate at which Sam mows the lawn. If Sam can mow the lawn in 4 hours, then Sam's rate is 1 lawn / 4 hours. Similarly, Rachel's rate is 1 lawn / 6 hours. The combined rate is the sum of their individual rates, which is (1 lawn / 4 hours) + (1 lawn / 6 hours) = (3 + 2) / 12 = 5 / 12. Since the combined rate is 5 / 12, it takes 12 / 5 hours to mow the lawn together. Calculate 12 …
A company has 15 machines, and each machine produces 12 units of a product per hour. How many units does the company produce in 3 hours?	The company produces 15 * 12 * 3 = 540 units in 3 hours. #### 540
A triangle has two sides measuring 5 cm and 12 cm. What is the length of the third side of the triangle if it is a right triangle, and the side measuring 12 cm is the hypotenuse?	Let x be the length of the third side. Using the Pythagorean theorem, we get x^2 + 5^2 = 12^2. Simplifying, we get x^2 + 25 = 144. So, x^2 = 144 - 25 = 119. x = sqrt(119) = 10.91. To two decimal places, x is 10.91. #### 10.91
If Sarah can paint a house in 8 hours, and John can paint the same house in 6 hours, how long will it take for both of them to paint the house?	Sarah can paint 1/8 of the house per hour. John can paint 1/6 of the house per hour. So, both of them together can paint (1/8 + 1/6) of the house per hour. Simplifying, (1/8 + 1/6) = (3 + 4)/(24) = 7/24. So, they can paint the house in 24/7 = 3.43 hours. To two decimal places, it will take them 3.43 hours. #### 3.43
A cylindrical tank has a height of 10 meters and a radius of 4 meters. What is the volume of the tank?	The formula to find the volume of a cylinder is πr^2h, where r is the radius and h is the height. Substituting the values, we get π(4)^2(10) = π(16)(10) = 160π = 160 * 3.14 = 502.4. To two decimal places, the volume is 502.4. #### 502.4
A car travels from City A to City B at an average speed of 60 km/h and returns at an average speed of 40 km/h. What is the average speed of the car for the entire trip?	Let the distance between City A and City B be x km. The time taken to travel from City A to City B is x/60 hours. The time taken to return is x/40 hours. The total time taken is x/60 + x/40 = (2x + 3x)/120 = 5x/120 hours. The total distance is 2x km. So, the average speed is 2x / (5x/120) = (2 * 120) / 5 = 48 km/h. #### 48
Two books are purchased at \$20 each. What is the total cost?	The total cost is found by multiplying the number of books to the cost of each book. 2 * 20 = 40. #### 40
If a car travels at 60 miles per hour for 2.5 hours, how many miles does it travel?	The distance travelled is found by multiplying the speed to the time. 60 * 2.5 = 150. #### 150
A set of 12 marbles has 3 red, 4 blue, and 5 green. What is the probability that a randomly chosen marble is blue?	The probability of the marble being blue is the number of blue marbles divided by the total number of marbles. 4 / 12 = 1 / 3. #### 1/3
A swimming pool is filled at a rate of 4 cubic feet per minute. If the pool is currently empty, how many minutes will it take to fill a 48 cubic feet pool?	To find the time taken to fill the pool, divide the capacity of the pool by the rate at which it is filled. 48 / 4 = 12. #### 12
A set of exam scores is 75, 85, 90, 95, 100. What is the median score?	To find the median, arrange the scores in ascending order, then the median is the middle value. Since there are 5 scores, the median is the third value. 75, 85, 90, 95, 100. The median is 90. #### 90
A bookshelf has 5 shelves, and each shelf can hold 8 books. How many books can the bookshelf hold in total?	The bookshelf can hold 5 x 8 = 40 books. ####40
A candy store is selling a total of 240 candies in small bags of 8 candies each. How many bags can they fill?	The number of bags that can be filled is 240 ÷ 8 = 30. ####30
If 9 boxes of crayons contain 18 crayons each, how many crayons are there in total?	There are 9 x 18 = 162 crayons in total. ####162
A person can fit 12 boxes in a single layer on a shelf. If they have 48 boxes, how many layers can they make?	The number of layers that can be made is 48 ÷ 12 = 4. ####4
A restaurant has 3 menus, and each menu has 16 food items. How many food items are there in total?	The total number of food items is 3 x 16 = 48. ####48
Lucas rolls two eight-sided dice simultaneously. What is the probability that both dice show the same number?	Since the probability of getting a certain number on the first die is 1/8, and the probability of getting the same number on the second die is also 1/8, we multiply these probabilities to get (1/8) × (1/8) = 1/64. Since there are eight possible numbers that can appear on both dice, we multiply by 8 to get 8/64 = 1/8. #### 1/8
What is the mean of the following set of data: 12, 18, 20, 15, 10?	First, add up all the elements: 12 + 18 + 20 + 15 + 10 = 75. Next, divide by the number of elements: 75 / 5 = 15. #### 15
A fair eight-sided die is rolled three times. What is the probability that exactly one of the rolls results in a 3?	The probability of not getting 3 on the first roll is 7/8. The probability of getting 3 on the second roll is 1/8. The probability of not getting 3 on the third roll is 7/8. So the probability of exactly one 3 is (7/8) × (1/8) × (7/8) = 49/512. However, since the one 3 can occur on any of the three rolls, we multiply by 3 to get 147/512. #### 147/512
A storage container has 4 compartments, and each compartment can hold 5 boxes. If the container is currently empty, how many boxes can it hold in total?	Since each compartment can hold 5 boxes, and there are 4 compartments, the total number of boxes the container can hold is 5 × 4 = 20. #### 20
Sofia used 12 apples to make 2 pies. How many apples did Sofia use to make each pie?	We can divide 12 by 2 to find out how many apples Sofia used to make each pie. 12 ÷ 2 = 6. #### 6
A bookshelf has 15 shelves, and each shelf can hold 8 books. If the bookshelf is currently empty, how many books can be placed on it in total?	First, multiply the number of shelves by the number of books each shelf can hold: 15 x 8 = 120. Therefore, the bookshelf can hold 120 books.
A rectangular prism has a length of 6 cm, a width of 4 cm, and a height of 8 cm. What is the surface area of the prism?	First, find the surface area of each side of the prism: 2(lw) + 2(lh) + 2(wh) = 2(6*4) + 2(6*8) + 2(4*8) = 2(24) + 2(48) + 2(32) = 48 + 96 + 64 = 208. Therefore, the surface area of the prism is 208.
A car travels 240 miles in 4 hours. How many miles does it travel per hour?	Divide the total distance traveled by the time taken: 240 ÷ 4 = 60. Therefore, the car travels 60 miles per hour.
A person has $500 in their savings account. If they deposit 10% of their salary every month, and their monthly salary is $2000, how much will they have in their savings account after 1 month?	First, find 10% of the monthly salary: 0.1 x 2000 = 200. Then, add the deposit to the initial amount: 500 + 200 = 700. Therefore, the person will have 700 in their savings account after 1 month.
A triangle has an angle of 45 degrees and an adjacent side of length 8 cm. What is the length of the opposite side?	Use the sine function: sin(45) = opposite side / 8. opposite side = 8 x sin(45) = 8 x 0.7071 = 5.657. Therefore, the length of the opposite side is 5.66 (rounded to two decimal places).
A toy store sells 350 stuffed animals at $5 each. How much money did the store make?	350 x $5 = $1750 #### 1750
In a quadrilateral, the measure of the second side is 7 times the measure of the first side. If the third side is 24 cm, and the fourth side is 10 cm, what are the measures of the first two sides?	Let's say the first side is x, then the second side is 7x. x + 7x + 24 + 10 = 360 (since the sum of all sides of a quadrilateral is 360 degrees). 8x + 34 = 360. 8x = 326. x = 40.875. The first side is 40.875, and the second side is 7(40.875) = 286.125 #### 40.875, 286.125
A farmer harvests 200 baskets of apples per day. How many baskets of apples does it harvest in 3 days?	200 x 3 = 600 #### 600
A survey of 70 students found that 40 students like reading, and 30 students like writing. What is the probability that a student likes both reading and writing, given that 20 students like both?	20/40 = 1/2 = 0.5, and 20/30 = 2/3 = 0.6667, so the probability of a student liking both reading and writing is 0.5 * 0.6667 = 0.3333 #### 0.3333
Emily has 40 boxes of crayons in her store originally. She ordered 36 more to be delivered at the end of the day. How many boxes of crayons will she have in her store at the end of the day?	40 + 36 = 76 #### 76
A train travels from Station A to Station B at an average speed of 50 km/h and returns at an average speed of 70 km/h. What is the average speed for the entire trip?	First, calculate the total distance traveled, which is the same in both directions. Let's call this 2x. The total time taken is the time taken to travel from A to B plus the time taken to return. This is x/50 + x/70. The average speed is the total distance divided by the total time taken. So, average speed = 2x/(x/50 + x/70) = 59.52 km/h. #### 59.52
A triangle has two angles that measure 45 degrees and 75 degrees. What is the measure of the third angle?	The sum of angles in a triangle is 180 degrees. Let the third angle be x. Then, 45 + 75 + x = 180. Solving for x, we get x = 60. #### 60
A library receives 240 books every month. They arrange the books in shelves, with 12 books in each shelf. How many shelves do they need?	To find the number of shelves, divide the total number of books by the number of books per shelf. Number of shelves = 240/12 = 20 shelves. #### 20
A farmer has 8 baskets of oranges. In each basket, there are 5 boxes. In each box, there are 6 oranges. How many oranges does the farmer have in total?	Multiply the number of baskets, boxes, and oranges per box to get the total number of oranges. Total oranges = 8 * 5 * 6 = 240 oranges. #### 240
A jar contains 5 yellow pencils, 7 blue pencils, and 3 green pencils. What is the probability that a randomly selected pencil is yellow?	The total number of pencils is 5 + 7 + 3 = 15. The probability of selecting a yellow pencil is the number of yellow pencils divided by the total number of pencils. Probability = 5/15 = 1/3. #### 1/3
A rectangular swimming pool is 15 meters long and 8 meters wide. What is the perimeter of the swimming pool?	The perimeter of a rectangle is 2 times the length plus 2 times the width. Therefore, the perimeter of the swimming pool is 2 x 15 + 2 x 8 = 30 + 16 = 46. #### 46
A bookstore has a total of 180 books on two shelves. The first shelf has 40 more books than the second shelf. How many books are on the first shelf?	Let's assume the number of books on the second shelf is x. Then, the number of books on the first shelf is x + 40. The sum of the books on both shelves is 180. So, x + x + 40 = 180. This simplifies to 2x + 40 = 180. Subtracting 40 from both sides gives 2x = 140. Dividing both sides by 2 gives x = 70. The number of books on the first shelf is x + 40 = 70 + 40 = 110. #### 110
A triangle has angles of 30 degrees, 60 degrees, and x degrees. What is the measure of angle x?	The sum of the angles of a triangle is 180 degrees. Therefore, 30 + 60 + x = 180. This simplifies to 90 + x = 180. Subtracting 90 from both sides gives x = 90. #### 90
A bakery sells a total of 250 loaves of bread and pastries in a day. The number of loaves of bread sold was 30 less than the number of pastries sold. How many loaves of bread were sold?	Let's assume the number of pastries sold is x. Then, the number of loaves of bread sold is x - 30. The sum of the loaves of bread and pastries sold is 250. So, x - 30 + x = 250. This simplifies to 2x - 30 = 250. Adding 30 to both sides gives 2x = 280. Dividing both sides by 2 gives x = 140. The number of loaves of bread sold is x - 30 = 140 - 30 = 110. #### 110
A cylindrical tank has a diameter of 2 meters and a height of 5 meters. What is the volume of the tank?	The volume of a cylinder is pi times the radius squared times the height. The radius is half of the diameter, which is 1 meter. The volume is pi x 1^2 x 5 = 5pi. Using a calculator, we get 5pi = 15.71. Rounding to the nearest whole number, the volume is 16. #### 16
Olivia invested $800 at 8% annual interest compounded annually. How much will Olivia have in her account after 12 years?	Olivia invested $800 at 8% annual interest compounded annually. To calculate the future value of Olivia's investment, we use the formula FV = PV*(1 + r)^n, where FV = future value, PV = present value, r = annual interest rate, and n = number of years. In this case, PV = $800, r = 8% = 0.08, and n = 12 years. First, we calculate the interest rate: r = 0.08. Next, we plug in the values into the for…
If x + 5 = 11, what is the value of x + 2?	If x + 5 = 11, then x = 11 - 5 = 6. To solve for x + 2, we plug in the value of x: x + 2 = 6 + 2 = 8. #### 8
Ava bought 4 sets of markers. Each set has 12 markers. How many markers does Ava have in total?	Ava bought 4 sets of markers. Each set has 12 markers. To calculate the total number of markers, we multiply the number of sets by the number of markers per set: 4 * 12 = 48. #### 48
A bookstore sells a total of 720 books and magazines on a certain day. The number of books sold is 120 more than the number of magazines. How many magazines were sold?	Let's say the number of magazines sold is x. The number of books sold is 120 more than the number of magazines, so the number of books sold is x + 120. The total number of books and magazines sold is 720, so we can set up the equation: x + (x + 120) = 720. Combining like terms, we get 2x + 120 = 720. Subtracting 120 from both sides, we get 2x = 600. Dividing both sides by 2, we get x = 300. #### …
Rachel has 24 boxes of stationery to pack into bags of 4 boxes each. How many bags of stationery can Rachel make?	Rachel has 24 boxes of stationery to pack into bags of 4 boxes each. To calculate the number of bags, we divide the total number of boxes by the number of boxes per bag: 24 ÷ 4 = 6. #### 6
What is the value of y in the equation 2y - 3 = 11?	To find the value of y, we add 3 to both sides of the equation, resulting in 2y = 11 + 3. This simplifies to 2y = 14. Then, we divide both sides by 2 to get y = 14/2. This finally gives us y = 7. #### 7
A bookstore sells 120 hardcover books and 80 paperback books in a day. If the hardcover books cost $25 each and the paperback books cost $15 each, what is the total amount of money the bookstore receives in a day?	First, we find the total amount of money from hardcover books, which is 120 x $25 = $3000. We then find the total amount of money from paperback books, which is 80 x $15 = $1200. Finally, we add these amounts together to get $3000 + $1200 = $4200. #### 4200
A bakery sells 180 cakes and 120 pastries in a day. If the cakes require 1/4 cup of sugar each and the pastries require 1/2 cup of sugar each, how many cups of sugar are required in total?	First, we find the total amount of sugar required for the cakes, which is 180 x 1/4 = 45 cups. We then find the total amount of sugar required for the pastries, which is 120 x 1/2 = 60 cups. Finally, we add these amounts together to get 45 + 60 = 105 cups. #### 105
The average of 3 numbers is 40. If the average of 2 of the numbers is 35, what is the average of the remaining 1 number?	First, we find the total sum of the 3 numbers, which is 3 x 40 = 120. We then find the total sum of the 2 numbers, which is 2 x 35 = 70. The remaining number is then 120 - 70 = 50. The average of this number is 50. #### 50
In a certain city, 40% of the population are males. If there are 480 males in the city, how many people are there in total?	We know that 40% of the population are males, so the total population is 480 / 0.4 = 1200 people. #### 1200
A bookstore sells 175 books per month. Each book costs $25. How much money does the bookstore make in a month?	First, multiply the number of books sold by the cost of each book. $25 x 175 = $4375. #### 4375
A bag contains 15 black marbles, 20 white marbles, and 10 gray marbles. What is the probability of drawing a white marble?	First, add the total number of marbles. 15 + 20 + 10 = 45. The number of white marbles is 20. Divide the number of white marbles by the total number of marbles. 20/45 = 4/9. #### 4/9
There are 8 groups of 6 students in a class. How many students are in the class?	Multiply the number of groups by the number of students in each group. 8 x 6 = 48. #### 48
What is the equation of the line that passes through the points (1,2) and (3,4)?	First, find the slope. (4-2)/(3-1) = 2/2 = 1. The equation of the line is y = x + b. Plug in the point (1,2). 2 = 1 + b. b = 1. The equation of the line is y = x + 1. #### 1
What is the standard deviation of the dataset 3, 5, 7, 9, 11?	First, find the mean. (3 + 5 + 7 + 9 + 11)/5 = 35/5 = 7. Next, find the variance. ((3-7)^2 + (5-7)^2 + (7-7)^2 + (9-7)^2 + (11-7)^2)/5 = (16 + 4 + 0 + 4 + 16)/5 = 40/5 = 8. The standard deviation is the square root of the variance. sqrt(8) = 2.828. #### 2.828
What is the probability that a coin lands on its edge when flipped?	Let's assume a fair coin with two sides: heads and tails. In this case, we can safely assume that the probability of landing on its edge is extremely low, and thus, we can use the concept of impossible events (i.e., probability 0). So, the probability of a coin landing on its edge is 0. #### 0
A cyclist travels from Town X to Town Y at an average speed of 25 km/h and returns at an average speed of 30 km/h. What is the average speed of the cyclist for the entire trip?	Let's assume the distance between Town X and Town Y is d. The time taken to travel from Town X to Town Y is d/25, and the time taken to travel from Town Y to Town X is d/30. The total time taken is (d/25) + (d/30) = (6d+5d)/150 = 11d/150. The total distance traveled is 2d, and the average speed is (2d) / (11d/150) = 300/11 km/h. #### 300/11
The probability of drawing a spade from a standard deck of 52 cards is p. What is the value of p?	There are 52 cards in a standard deck, and 13 of them are spades. So, the probability of drawing a spade is 13/52. #### 13/52
A book and a notebook together cost 12.50 dollars. The book costs 8.50 dollars more than the notebook. How much does the notebook cost?	Let's assume the cost of the notebook is x. Then, the cost of the book is x + 8.50. The total cost is x + (x + 8.50) = 12.50. Simplifying, we get 2x + 8.50 = 12.50, which gives x = 2.00. #### 2
The area of a triangle is 24 and its height is 6. What is its base?	The formula for the area of a triangle is (base * height) / 2. Substituting the given values, we get 24 = (base * 6) / 2. Simplifying, we get base = 8. #### 8
A library has 12 shelves, and each shelf can hold 10 books. If the library is currently empty, how many books can be placed on the shelves in total?	To find the total number of books the library can hold, we multiply the number of shelves by the number of books each shelf can hold. 12 x 10 = 120. So, the library can hold a total of 120 books. #### 120
A group of students want to share some candies equally. If they have 180 candies and there are 12 students, how many candies will each student get?	To find out how many candies each student will get, we divide the total number of candies by the number of students. 180 ÷ 12 = 15. So, each student will get 15 candies. #### 15
A company has a sale of 15% off on all its products. If a product originally costs $80, how much will it cost during the sale?	To find the discount, we multiply the original price by the discount percentage. $80 x 0.15 = $12. So, the discount is $12. To find the sale price, we subtract the discount from the original price. $80 - $12 = $68. So, the product will cost $68 during the sale. #### 68
A survey found that 60% of the people surveyed said they exercise regularly. 30% of the 60% also said they exercise daily. If 200 people were surveyed, how many people said they exercise daily?	First, we find the number of people who said they exercise regularly. 200 x 0.6 = 120. Then, we find the number of people who said they exercise daily. 120 x 0.3 = 36. So, 36 people said they exercise daily. #### 36
A group of friends want to know the probability of rolling an even number on a six-sided fair die. What is the probability?	There are 3 even numbers (2, 4, 6) out of a total of 6 possible outcomes. So, the probability of rolling an even number is 3/6, which simplifies to 1/2. The probability is 1/2 or 50%. #### 50
A bakery sells a total of 150 loaves of bread in a day. If it sells a combination of small and large loaves, with the small loaves selling at 2 dollars each and the large loaves selling at 5 dollars each, and the total revenue is 560 dollars, how many small loaves were sold?	Let s be the number of small loaves sold. Then 150 - s would be the number of large loaves sold. The total revenue is 560 dollars. The revenue from small loaves is 2s dollars and the revenue from large loaves is 5(150 - s) dollars. Total revenue is the sum of these two revenues. So, 2s + 5(150 - s) = 560. Simplify the equation. 2s + 750 - 5s = 560. -3s = -190. s = 63. #### 63
A rectangular picture has a perimeter of 40 centimeters. If the width is 8 centimeters, what is the length of the picture?	The perimeter of a rectangle is 2 times the sum of its length and width. So, 2(l + w) = 40. Substitute width as 8 centimeters. 2(l + 8) = 40. Simplify the equation. l + 8 = 20. l = 20 - 8. l = 12. #### 12
What is the value of y if 2y - 3 = 7?	Add 3 to both sides of the equation. 2y = 7 + 3. 2y = 10. Divide both sides by 2. y = 10/2. y = 5. #### 5
A car traveled from city A to city B. It traveled at an average speed of 60 kilometers per hour for 2 hours, and then an average speed of 40 kilometers per hour for 3 hours. What is the total distance traveled by the car?	The distance traveled at 60 kilometers per hour for 2 hours is 60 * 2 = 120 kilometers. The distance traveled at 40 kilometers per hour for 3 hours is 40 * 3 = 120 kilometers. Total distance is the sum of these two distances. Total distance = 120 + 120 = 240 kilometers. #### 240
A cylindrical tank with a radius of 3 meters and height of 5 meters is filled with water. What is the volume of water in the tank?	The formula for the volume of a cylinder is πr²h. Substitute radius as 3 meters and height as 5 meters. Volume = π(3)²(5). Volume = π(9)(5). Volume = 45π. Approximate π as 3.14. Volume ≈ 45 * 3.14. Volume ≈ 141.3. #### 141
A water tank can fill in 6 hours. Due to a leak, it takes 10 hours to fill. How many hours will it take to empty the full tank?	Let the capacity of the tank be x. Hence, the rate of filling is x/6 and the rate of filling when there is a leak is x/10. The rate of leakage = x/10 - x/6 = (6x-10x)/60 = -4x/60 = -x/15. Hence, the time taken to empty the full tank = x/(x/15) = 15. #### 15
There are 150 tennis balls in a basket. Each can of tennis balls contains 5 tennis balls. How many cans are needed to hold all the tennis balls?	Divide the total number of tennis balls by the number of tennis balls in each can. Hence, the number of cans needed = 150/5 = 30. #### 30
A bakery sells a total of 250 loaves of bread per day. They sell a combination of whole wheat and white bread. If 30% of the loaves sold are whole wheat, how many loaves of whole wheat bread are sold per day?	Let the total number of loaves sold be x. Hence, 30% of x = 0.3x. It is given that x = 250. Therefore, 0.3x = 0.3 * 250 = 75. #### 75
In a school, 400 students are enrolled in a program. If 20% of the students are enrolled in math and 30% in science, how many students are enrolled in neither math nor science?	The number of students enrolled in math = 20% of 400 = 0.2 * 400 = 80. The number of students enrolled in science = 30% of 400 = 0.3 * 400 = 120. Since some students are enrolled in both math and science, we subtract the total number of students from the sum of the students in math and science. Assume the number of students enrolled in both math and science is x. Then, 80 + 120 - x = 400. x = 200…
In a factory, 80 units of a product are produced every hour. If 20 units are produced in the first 15 minutes, how many units are produced in the next 45 minutes?	In the first 15 minutes, 20 units are produced. Hence, the rate of production = 20/(1/4) = 80 units/hour. Hence, the number of units produced in the next 45 minutes = 80 * (3/4) = 60. #### 60
Sam has 240 stickers and he wants to share them equally among 8 of his friends. How many stickers will each friend get?	First, divide the total number of stickers by the number of friends: 240 ÷ 8 = 30. #### 30
A toy car track is 3 meters long. If it is extended by 2 meters, how long will it be?	To find the new length, add the extension to the original length: 3 + 2 = 5. #### 5
Emily has 50 pencils in her pencil case. If she gives 12 to her brother, what fraction of pencils does Emily have left?	First, subtract the number of pencils given away from the total number of pencils: 50 - 12 = 38. Next, divide the number of pencils left by the total number of pencils: 38 ÷ 50 = 0.76. #### 0.76
A water tank can hold 400 liters of water. If 240 liters of water are already in the tank, what percentage of the tank is full?	First, divide the amount of water already in the tank by the total capacity: 240 ÷ 400 = 0.6. Then, convert the decimal to a percentage: 0.6 × 100 = 60. #### 60
Ben scored 72, 85, and 91 in his three math tests. What is his average score?	First, add the three test scores: 72 + 85 + 91 = 248. Next, divide the sum by the number of tests: 248 ÷ 3 = 82.67. #### 83
As of 2025, there are 5,600,000,000 internet users in the world. If 22% of the users are from Asia, how many users are from Asia?	First, find 22% of 5,600,000,000. Multiply 5,600,000,000 by 0.22. 5,600,000,000 x 0.22 = 1,232,000,000. #### 1232000000
A bookstore sells 400 books per week. If they make a profit of $1.25 per book, how much profit do they make per week?	Multiply 400 by $1.25. 400 x 1.25 = 500. #### 500
A restaurant sells a total of 400 burgers per day. They sell a combination of beef and chicken burgers. If the ratio of beef to chicken burgers is 2:3, how many beef burgers are sold?	First, find the total parts of the ratio. 2 + 3 = 5. Then divide 400 by 5. 400 / 5 = 80. Now multiply 80 by 2. 80 x 2 = 160. #### 160
The median of 7 consecutive integers is 12. What are the 7 integers?	Since the median is 12, that must be the 4th integer. Then count up and down to get the rest. 9, 10, 11, 12, 13, 14, 15. #### 9 10 11 12 13 14 15
What is the surface area of a box that is 9 inches by 6 inches by 2 inches?	First, find the area of each face. Front and back faces are 9 x 6 = 54 each. Top and bottom faces are 9 x 2 = 18 each. Side faces are 6 x 2 = 12 each. Then add up all the faces. 54 + 54 + 18 + 18 + 12 + 12 = 168. #### 168
A bookshelf has 5 rows with 8 books in each row. How many books are there in total in the bookshelf?	First, we need to multiply the number of rows by the number of books per row. So, we multiply 5 by 8. 5 * 8 = 40. #### 40
A box contains 18 red balls, 12 blue balls, and 10 green balls. How many balls are there in the box in total?	First, we need to add the number of red balls, blue balls, and green balls. So, we add 18 + 12 + 10. 18 + 12 + 10 = 40. #### 40
In a rectangle ABCD, the length is 8 cm and the breadth is 5 cm. What is the area of the rectangle?	First, we need to multiply the length by the breadth. So, we multiply 8 by 5. 8 * 5 = 40. #### 40
A toy factory manufactures 200 toys per day. If they operate for 7 days a week, how many toys do they manufacture in a week?	First, we need to multiply the number of toys per day by the number of days in a week. So, we multiply 200 by 7. 200 * 7 = 1400. #### 1400
A water tank can hold 3000 liters of water. If 1200 liters of water are already filled in the tank, how much more water can be filled in the tank?	First, we need to subtract the amount of water already filled from the total capacity of the tank. So, we subtract 1200 from 3000. 3000 - 1200 = 1800. #### 1800
A bookstore has 12 shelves, and each shelf can hold 8 stacks of books. If the bookstore currently has 70 stacks of books, how many more stacks can it hold?	The bookstore has 12 x 8 = 96 stacks of available space. Since it currently has 70 stacks of books, it can hold 96 - 70 = 26 more stacks of books. #### 26
A car travels from City A to City B at an average speed of 60 kilometers per hour. How far does it travel in 2.5 hours?	The car travels at 60 km/h, so it travels 60 x 2.5 = 150 kilometers in 2.5 hours. #### 150
Rachel has 18 boxes of crayons. Each box contains 24 crayons. How many crayons does Rachel have?	Rachel has 18 boxes, and each box contains 24 crayons. So, she has 18 x 24 = 432 crayons. #### 432
A water tank can hold 4800 liters of water. If 3200 liters of water are already in the tank, how much more water can it hold?	The tank can hold 4800 liters of water. Since 3200 liters are already in the tank, it can hold 4800 - 3200 = 1600 more liters of water. #### 1600
A company sells 300 units of a product at $50 each and 200 units of another product at $75 each. How much money did the company make in total?	The company sold 300 units of the first product at $50 each, so it made 300 x 50 = 15000 dollars. It sold 200 units of the second product at $75 each, so it made 200 x 75 = 15000 dollars. In total, the company made 15000 + 15000 = 30000 dollars. #### 30000
In a group of 80 students, 30 are athletes and 20 play football. What is the probability that a student who is an athlete plays football?	Let's find the number of students who are athletes and play football. Since there are 30 athletes and 20 football players, we assume that all 20 football players are athletes (could be an overestimation, but it gives the highest possible probability). So, the probability that a student who is an athlete plays football is 20/30 = 2/3 = 0.67 #### 0.67
What is the length of the hypotenuse of a right triangle with legs 3 cm and 4 cm?	Using the Pythagorean theorem, the hypotenuse is sqrt(3^2 + 4^2) = sqrt(9 + 16) = sqrt(25) = 5 #### 5
A truck travels from City A to City B at an average speed of 70 km/h and returns at an average speed of 50 km/h. What is the average speed for the entire trip?	Let's assume the distance between City A and City B is d km. The total distance traveled is 2d km. The total time taken is (d/70 + d/50) hours. Now, the average speed is the total distance divided by the total time: 2d / (d/70 + d/50) = (2*50*70) / (50+70) km/h = (7000/120) km/h = 58.33 #### 58.33
In a rectangle, the length is 5 cm more than the breadth. If the perimeter is 30 cm, what is the length of the rectangle?	Let the breadth be x cm. Then, the length is x + 5 cm. The perimeter is 30 cm, so 2(x + x + 5) = 30. Simplifying, we get 4x + 10 = 30, or 4x = 20. x = 5. So, the length is 5 + 5 = 10 cm #### 10
A vendor sells 20 packets of biscuits and 15 packets of chips every day. If he sells each packet of biscuits for 10 dollars and each packet of chips for 8 dollars, what is his average sale price per packet?	The total sale amount is 20*10 + 15*8 = 200 + 120 = 320 dollars. The total number of packets sold is 20 + 15 = 35. So, the average sale price is 320/35 = 9.14 #### 9.14
A bookstore has 15 shelves, and each shelf can hold 8 books. If the store is currently empty, how many books can be placed in total?	The bookstore has 15 shelves, and each shelf can hold 8 books. So, to find the total number of books, we multiply the number of shelves by the number of books each shelf can hold. This gives us 15 * 8 = 120. #### 120
In a bag of 12 candies, 4 are sour, 5 are sweet, and the rest are salty. What is the probability of randomly selecting a salty candy?	We are given that there are 4 sour candies and 5 sweet candies, so the number of salty candies is 12 - 4 - 5 = 3. The total number of candies is 12. So, the probability of selecting a salty candy is the number of salty candies divided by the total number of candies, which is 3/12 = 1/4 = 0.25. #### 0.25
A car travels from city A to city B at 80 km/h and returns at 60 km/h. What is the average speed for the round trip?	Let's assume the distance between city A and city B is d. Then the time taken to travel from city A to city B is d/80, and the time taken to travel from city B to city A is d/60. The total time taken is d/80 + d/60 = d(1/80 + 1/60) = d/48. The total distance traveled is 2d. So, the average speed is the total distance divided by the total time, which is 2d/(d/48) = 2*48 = 96/2 = 48. #### 48
A bike rental company has 18 bikes available for rent. If 8 bikes are currently rented out, what is the probability that a person renting a bike will get a bike with a broken seat?	We are not given the number of bikes with broken seats. So, we cannot determine the probability. This question is incomplete. #### 0
A cylindrical tank can hold 1200 liters of water. If 300 liters of water are already in the tank, what percentage of the tank is filled?	The percentage of the tank that is filled is the amount of water already in the tank divided by the total capacity, which is 300/1200 = 1/4 = 0.25 = 25%. #### 25
Sarah invested $3,200 to earn 6% annual interest for 10 years. How much interest will she earn?	First, calculate the interest rate in decimal format: 6% = 0.06. Then, multiply the investment amount, interest rate, and the number of years: $3200 x 0.06 x 10 = $1920. #### 1920
A bookstore sells 300 books per day. Each book costs $15. How much money does the bookstore make in a day?	Multiply the number of books sold and the cost of each book: 300 x $15 = $4500. #### 4500
A car travels 250 miles in 5 hours. How many miles will it travel in 12 hours?	Calculate the speed of the car in miles per hour: 250 / 5 = 50 mph. Then, multiply the speed by the number of hours: 50 x 12 = 600 miles. #### 600
What is the value of y in the equation: 3y - 2 = 14?	Add 2 to both sides of the equation: 3y = 16. Then, divide both sides by 3: y = 16 / 3 = 5.33. #### 5.33
Rachel has 24 bags of apples to pack into boxes of 4 bags each. How many boxes of apples can Rachel make?	Divide the number of bags by the number of bags per box: 24 / 4 = 6 boxes. #### 6
A bookstore sells a total of 480 novels and biographies on Friday. They sell 80 more novels than biographies. If they sell 200 biographies, how many novels did they sell?	Let's say the number of biographies is x. Then, the number of novels is x + 80. The total number of books is 480. So, x + (x + 80) = 480. Combining like terms, we get 2x + 80 = 480. Subtracting 80 from both sides, we get 2x = 400. Dividing by 2, we get x = 200. So, the number of novels is 200 + 80 = 280. #### 280
Rachel has 30 shirts in her closet. She gives 5 to her sister and buys 7 more. What percentage of her original number of shirts does she have now?	Rachel initially had 30 shirts. She gave away 5, so she had 30 - 5 = 25 shirts. Then, she bought 7 more, so she had 25 + 7 = 32 shirts. The percentage of her original number of shirts is (32/30)*100 = (32/3)*10 = (320/3) = 106.67%. #### 106.67
The trapezoid in the diagram has a height of 8 cm and two parallel sides of length 10 cm and 12 cm. What is the area of the trapezoid?	The area of the trapezoid is (1/2)*h*(a + b) = (1/2)*8*(10 + 12) = (1/2)*8*22 = 4*11 = 88. #### 88
The volume of a cube is 125 cubic inches. If the length of one side of the cube is x inches, what is x?	The volume of the cube is x^3 = 125. Taking the cube root of both sides, we get x = 5. #### 5
What is the median of the dataset 11, 13, 15, 17, 19?	First, we arrange the data in order: 11, 13, 15, 17, 19. Since there are an odd number of data points, the middle value is the median. The median is 15. #### 15
A bookstore has 18 shelves, and each shelf can hold 12 stacks of books. If the bookstore is currently holding 216 stacks of books, how many shelves are not in use?	Divide 216 by 12. This gives us the number of shelves in use, which is 18. Since all the shelves are already in use, the number of shelves not in use is 0. #### 0
A group of friends want to share some candy in the ratio 2:3:4. If they have 540 pieces of candy, how much candy will the friend with the highest share get?	First, we find the total ratio by adding 2, 3, and 4, which gives us 9. Then, we divide 540 by 9, which gives us 60. Multiply 60 by 4, since the friend with the highest share gets the 4 part of the ratio. #### 240
A farmer has 15 baskets of apples. Each basket contains 20 apples. How many apples does the farmer have in total?	Multiply 15 by 20. #### 300
A factory produces 200 toys per hour. How many toys does it produce in 7 hours?	Multiply 200 by 7. #### 1400
A library has 24 shelves of books, and each shelf can hold 30 books. If the library currently has 480 books, how many books can it still hold?	Multiply 24 by 30, which gives us 720. Then, subtract 480 from 720, since the library already has 480 books. #### 240
If a pencil is 15 cm long and is divided into three equal parts, how long is each part?	Divide the length of the pencil by 3 to get the length of each part. 15 divided by 3 is 5. #### 5
Sara's favorite book has 250 pages. She has already read 45 pages. What percentage of the book has she read?	First, find the number of pages Sara has read as a fraction of the total number of pages. 45/250 is 0.18. Multiply this by 100 to get the percentage. 0.18 * 100 is 18. #### 18
Mary has 18 cookies and wants to package them in bags of 3 cookies each. How many bags can she make?	Divide the number of cookies by the number of cookies per bag. 18 divided by 3 is 6. #### 6
A rectangular garden measures 10 meters by 5 meters. If a path that is 1 meter wide is built around the garden, what is the area of the path?	Find the area of the larger rectangle (including the path) by multiplying the length and width. This is 12 * 7, which is 84. The area of the smaller rectangle (without the path) is 10 * 5, which is 50. Subtract the smaller area from the larger area to get the area of the path. 84 - 50 is 34. #### 34
A factory produces 420 boxes of cereal per hour. If it operates for 8 hours, how many boxes of cereal does it produce?	Multiply the number of boxes produced per hour by the number of hours. 420 * 8 is 3360. #### 3360
A bookshelf has 5 shelves, and each shelf can hold 8 books. How many books can the bookshelf hold in total?	The bookshelf has 5 shelves and each shelf can hold 8 books. To find the total number of books it can hold, we multiply the number of shelves by the number of books each shelf can hold: 5 x 8 = 40. #### 40
Alex has 15 pencils in his pencil case. He adds 7 more pencils to it. How many pencils does Alex have now?	Alex had 15 pencils initially and added 7 more. To find the total number of pencils, we add the initial number of pencils to the number of pencils added: 15 + 7 = 22. #### 22
A water tank can hold 1200 liters of water. If 300 liters of water are already in the tank, how much more water can it hold?	The tank can hold 1200 liters of water. If 300 liters are already in the tank, we subtract the amount of water already in the tank from the total capacity to find the remaining capacity: 1200 - 300 = 900. #### 900
A bakery sells 30 cakes at $2.50 each. What is the total amount of money the bakery earns?	The bakery sells 30 cakes at $2.50 each. To find the total amount of money earned, we multiply the number of cakes by the price of each cake: 30 x 2.50 = 75. #### 75
A rectangular garden measures 10 meters in length and 5 meters in width. If a path that is 1 meter wide is built around the garden, what is the area of the path?	The length and width of the garden are 10 meters and 5 meters, respectively. The path is 1 meter wide, so the outer dimensions of the garden with the path are 12 meters in length and 7 meters in width. The area of the garden is 10 x 5 = 50 square meters. The area of the garden with the path is 12 x 7 = 84 square meters. The area of the path is the difference between the two areas: 84 - 50 = 34. #…
What is the value of y in the equation 3y - 2 = 14?	This equation can be solved by adding 2 to both sides of the equation, which gives 3y = 16. Dividing both sides of the equation by 3 gives y = 16 / 3. Simplifying the fraction gives y = 5 1/3. #### 5.3333
A water tank is in the shape of a cylinder with a diameter of 2 meters and a height of 3 meters. If 60% of the tank is filled with water, how many cubic meters of water are in the tank?	The volume of the cylinder is V = πr²h, where r is the radius and h is the height. Since the diameter is 2 meters, the radius is 1 meter. The volume is then V = π(1)²(3) = approximately 9.42478 cubic meters. Since 60% of the tank is filled with water, the volume of water in the tank is 0.6 × 9.42478 = approximately 5.65487 cubic meters. #### 5.65487
If Sally can paint a wall in 6 hours and John can paint the same wall in 8 hours, how long will it take for both Sally and John to paint the wall together?	Sally's rate of painting is 1/6 of the wall per hour. John's rate of painting is 1/8 of the wall per hour. The combined rate of painting is 1/6 + 1/8 = 7/24 of the wall per hour. The time it takes to paint the wall together is then 1 / (7/24) = 24/7 = approximately 3.42857 hours. #### 3.42857
A bakery sells 240 loaves of bread per day. They pack 12 loaves of bread in a box. How many boxes of bread does the bakery sell per day?	The number of boxes sold per day is the total number of loaves sold per day divided by the number of loaves per box. This is 240 / 12 = 20 boxes per day. #### 20
A car travels from City A to City B at an average speed of 60 km/h and returns at an average speed of 40 km/h. What is the average speed of the car for the entire trip?	The average speed of the car for the entire trip is the total distance traveled divided by the total time taken. Since the distance from City A to City B is the same as the distance from City B to City A, the total distance is 2 times the distance from City A to City B. Let the distance from City A to City B be d. The total time taken is then (d / 60) + (d / 40) = (2d / 60) + (3d / 60) = 5d / 60.…
If a bakery makes 24 cupcakes in a batch, and they have 4 batches, how many cupcakes do they have in total?	First, we multiply the number of cupcakes in a batch by the number of batches: 24 x 4 = 96. #### 96
Sarah has 18 pencils in her pencil case. She gives 2 pencils to her brother. How many pencils does Sarah have left?	We subtract the number of pencils Sarah gave away from the total number of pencils she had: 18 - 2 = 16. #### 16
A bookshelf has 5 shelves, and each shelf can hold 8 books. If the bookshelf is currently empty, how many books can be placed on it in total?	We multiply the number of shelves by the number of books each shelf can hold: 5 x 8 = 40. #### 40
What is the measure of the angle in a right triangle with a hypotenuse of 12 inches and one leg of 9 inches?	Using the Pythagorean theorem, we can find the length of the other leg: √(12^2 - 9^2) = √(144 - 81) = √63. Then, we use the inverse tangent function to find the angle: arctan(9/√63) ≈ 53.13 degrees. #### 53.13
Mike has 21 stickers in his sticker book. He wants to share them equally among 3 of his friends. How many stickers will each friend get?	We divide the total number of stickers by the number of friends: 21 ÷ 3 = 7. #### 7
A farmer has 150 bales of hay each weighing 20 kilograms. If he receives a new shipment of 80 bales of hay each weighing 15 kilograms, how many kilograms of hay does the farmer have in total?	The farmer has 150 bales each weighing 20 kilograms, so initially the farmer has 150 x 20 = 3000 kilograms of hay. After receiving the new shipment, the farmer will have an additional 80 x 15 = 1200 kilograms of hay. The total kilograms of hay the farmer will have is 3000 + 1200 = 4200. #### 4200
A snail is at the bottom of a 20-foot well. Each day, it climbs up 3 feet, but at night, it slips back 2 feet. How many days will it take for the snail to reach the top of the well?	Each day the snail climbs 3 feet, but at night it slips back 2 feet, so the total distance climbed each day is 3 - 2 = 1 foot. The snail needs to climb 20 feet, so it will take 20 / 1 = 20 days. #### 20
A bakery sells 250 loaves of bread per day. If each loaf costs $2.50, how much money does the bakery make in a day?	The bakery sells 250 loaves of bread each day. If each loaf costs $2.50, the total money made by the bakery is 250 x 2.50 = 625. #### 625
A rectangular garden measures 15 meters by 8 meters. A path that is 2 meters wide is built around the garden. What is the area of the path?	The garden has dimensions 15 meters by 8 meters, so its area is 15 x 8 = 120 square meters. The path is 2 meters wide, so the outer dimensions of the garden with the path are 15 + 2 + 2 = 19 meters and 8 + 2 + 2 = 12 meters. The area of the garden with the path is 19 x 12 = 228 square meters. The area of the path is 228 - 120 = 108 square meters. #### 108
A group of friends want to share some candy equally. If they have 48 pieces of candy and there are 8 friends, how many pieces of candy will each friend get?	To find the number of pieces of candy each friend will get, we divide the total number of pieces of candy by the number of friends. 48 / 8 = 6. #### 6
A rectangular garden measures 15m by 8m. A path that is 2m wide is built around the garden. What is the area of the path?	The area of the garden is 15m x 8m = 120m². The outer dimensions of the garden with the path is (15+4)m x (8+4)m = 19m x 12m = 228m². The area of the path is 228m² - 120m² = 108m². #### 108
The total cost of 12 shirts and 8 pants is $384. If the cost of 1 shirt is $24, how much does 1 pair of pants cost?	The total cost of 12 shirts is 12 x $24 = $288. The total cost of 8 pants is $384 - $288 = $96. The cost of 1 pair of pants is $96 / 8 = $12. #### 12
In a triangle, one angle is 2 times another angle, and the third angle is 30 degrees. What is the sum of the two larger angles?	If one angle is 2x, and another angle is x, then 2x + x + 30 = 180. 3x + 30 = 180. 3x = 180 - 30 = 150. x = 150/3 = 50. The larger angles are 2x = 2*50 = 100 and x = 50. The sum of the two larger angles is 100 + 50 = 150. #### 150
If a bakery sells 420 loaves of bread per week, and each loaf costs $2.50, how much money does the bakery make in a week?	The total amount of money made by the bakery in a week is 420 loaves x $2.50/loaf = $1050. #### 1050
A water tank can hold 1200 liters of water. If 3/5 of the tank is already filled, how many more liters of water can be added?	The amount of water already in the tank is (3/5) x 1200 liters = 720 liters. The amount of water that can be added is 1200 liters - 720 liters = 480 liters. #### 480
A cube has a volume of 125 cubic meters. What is the length of one side of the cube?	The formula for the volume of a cube is V = s^3, where s is the length of one side. In this case, V = 125, so 125 = s^3, which means s = 5. Therefore, the length of one side of the cube is 5. #### 5
A circle has a circumference of 20π meters. What is the diameter of the circle?	The formula for the circumference of a circle is C = 2πr, where r is the radius. In this case, C = 20π, so 20π = 2πr, which means r = 10. The diameter is twice the radius, so the diameter is 20. #### 20
What is the value of y if 3y - 2 = 14?	Add 2 to both sides of the equation to get 3y = 16. Divide both sides by 3 to get y = 16/3. Simplify to get y = 5 1/3. #### 5.33
In a triangle, the length of the base is 5 inches and the height is 6 inches. What is the length of the hypotenuse?	Use the Pythagorean theorem, which states that a^2 + b^2 = c^2, where a is the base, b is the height, and c is the hypotenuse. In this case, a = 5, b = 6, so 5^2 + 6^2 = c^2, which means c^2 = 61, so c = sqrt(61). Simplify to get c ≈ 7.81. #### 7.81
A sphere has a surface area of 36π square meters. What is the radius of the sphere?	The formula for the surface area of a sphere is A = 4πr^2, where r is the radius. In this case, A = 36π, so 36π = 4πr^2, which means r^2 = 9, so r = 3. Therefore, the radius of the sphere is 3. #### 3
A snail is at the bottom of a 20-foot well. Each day, it climbs up 3 feet, but at night, it slips back 2 feet. How many days will it take for the snail to reach the top of the well?	Let's start by identifying the pattern. The snail climbs 3 feet and slips back 2 feet, so the net progress each day is 3 - 2 = 1 foot. Since the well is 20 feet deep, the snail needs to make 20 feet of progress. Since the snail makes 1 foot of progress each day, it will take 20 feet / 1 foot/day = 20 days. However, on the 20th day, the snail will climb the last 3 feet to reach the top, so it will…
A factory produces 400 units of a product every 4 hours. How many units will it produce in 12 hours?	The factory produces 400 units every 4 hours, so its production rate is 400 units / 4 hours = 100 units/hour. To find out how many units it will produce in 12 hours, multiply the production rate by the time: 100 units/hour × 12 hours = 1200 units. #### 1200
A car travels from City A to City B at an average speed of 60 km/h and returns at an average speed of 40 km/h. What is the average speed for the round trip?	To find the average speed, first find the total distance and the total time. Let the distance between City A and City B be x km. The time taken to travel from City A to City B is x km / 60 km/h = x/60 hours. The time taken to return is x km / 40 km/h = x/40 hours. The total distance is 2x km, and the total time is x/60 + x/40 hours. Simplify the total time: x/60 + x/40 = (2x + 3x)/120 = 5x/120 ho…
A cylindrical tank can hold 1200 liters of water. If 300 liters of water are already in the tank, how much more water can be added?	The tank can hold 1200 liters of water, and 300 liters are already in the tank. Subtract the amount already in the tank from the total capacity: 1200 liters - 300 liters = 900 liters. #### 900
A bookshelf has 5 shelves, and each shelf can hold 8 books. If the bookshelf is currently empty, how many books can be placed on it in total?	The bookshelf has 5 shelves, and each shelf can hold 8 books. Multiply the number of shelves by the number of books each shelf can hold: 5 shelves × 8 books/shelf = 40 books. #### 40
Michael has 20 boxes of markers, and each box has 12 markers. How many markers does Michael have?	First, multiply the number of boxes by the number of markers in each box: 20 * 12 = 240. ####240
Mr. Thompson has a bag of oranges. He gave 20 oranges to his neighbor. If he is left with 35 oranges, how many oranges did Mr. Thompson originally have?	Let's start by using the information that Mr. Thompson is left with 35 oranges after giving 20 to his neighbor. To find the original number of oranges, add the number of oranges given away to the number of oranges left: 35 + 20 = 55. ####55
A furniture store is having a sale. They are offering a 20% discount on all sofas. If a sofa originally costs $120, what is the discount amount?	First, find 20% of the original price: 20% of 120 = 0.20 * 120 = 24. The discount amount is $24. ####24
A group of students want to share some pencils equally. If they have 72 pencils and there are 9 students, how many pencils will each student get?	Divide the total number of pencils by the number of students: 72 ÷ 9 = 8. Each student will get 8 pencils. ####8
In a certain city, 40% of the residents are adults. If there are 300 residents in total, how many adults are there in the city?	First, find 40% of the total number of residents: 40% of 300 = 0.40 * 300 = 120. There are 120 adults in the city. ####120
The volume of a rectangular prism is 2016 cubic cm. If the length of the prism is 21 cm and the width is 12 cm, what is the height of the prism?	Let us first find the area of the rectangular base using the formula Area = Length * Width = 21 * 12 = 252 square cm. Now, find the height using the formula Volume = Area * Height. Substitute the values and solve for Height. 2016 = 252 * Height. Height = 2016/252 = 8 cm. #### 8
In a game, a player earns points at a rate of 5 points per minute. If the player played for 42 minutes, how many points did the player earn?	Multiply the rate with the time to get the points earned. Points earned = Rate * Time = 5 * 42 = 210. #### 210
A sphere with a radius of 5 cm has a volume of what cubic centimeters?	Use the formula Volume = (4/3) * pi * Radius^3. Substitute the value of the radius. Volume = (4/3) * pi * 5^3 = (4/3) * 3.14 * 125 = 523.33. #### 523
Rohan has 48 cookies in a jar. He eats 12 of them. What percentage of the cookies are left?	First, find the number of cookies left. Cookies left = Total cookies - Eaten cookies = 48 - 12 = 36. Now, find the percentage. Percentage = (Cookies left / Total cookies) * 100 = (36 / 48) * 100 = 75. #### 75
11 in base 9 is equal to what in base 10?	Convert the number by multiplying the power of the base. In base 9, 11 means 1*9 + 1*1 = 10. #### 10
A bookstore has 15 shelves, and each shelf can hold 20 boxes of books. If the bookstore currently has 200 boxes of books, how many more boxes can it hold?	Let's calculate the total capacity of the bookstore first. Since there are 15 shelves and each can hold 20 boxes, the total capacity is 15 x 20 = 300. The bookstore currently has 200 boxes, so it can hold 300 - 200 = 100 more boxes. ####100
A survey of 20 students found that 12 prefer pizza, 4 prefer burgers, and the rest prefer sandwiches. What is the probability that a student randomly selected from the group prefers sandwiches?	There are 20 students in total. Since 12 prefer pizza and 4 prefer burgers, the number of students who prefer sandwiches is 20 - 12 - 4 = 4. So, the probability is 4/20 = 0.2. ####0.2
A company has 500 employees. If the company hires 10% more employees each year, how many employees will it have after 5 years?	Initially, the company has 500 employees. After 1 year, it will have 500 x 1.1 = 550 employees. After 2 years, it will have 550 x 1.1 = 605 employees. After 3 years, it will have 605 x 1.1 = 665.5 employees. After 4 years, it will have 665.5 x 1.1 = 732.05 employees. After 5 years, it will have 732.05 x 1.1 = 805.25 employees. ####805
A cyclist travels from Town A to Town B at an average speed of 25 km per hour. If the distance between the two towns is 120 km, how many hours does it take for the cyclist to travel from Town A to Town B?	To find the time, we can use the formula: time = distance / speed. Plugging in the values, we get time = 120 / 25 = 4.8 hours. ####4.8
A water tank can hold 480 liters of water. If 320 liters of water are already in the tank, how much more water can it hold?	The tank can hold 480 liters of water, and 320 liters are already in it. So, it can hold 480 - 320 = 160 more liters. ####160
A company is producing 250 units of a particular product daily. How many units will they produce in 5 days?	The company produces 250 units per day. Multiply this by the number of days they produce the product, which is 5 days. So, 250 * 5 = 1250. #### 1250
A bag contains 12 apples. 3 more apples are added. How many apples are there in the bag now?	Originally, there were 12 apples. 3 apples were added. So, the number of apples in the bag now is 12 + 3 = 15. #### 15
The scores of 5 students are 72, 85, 90, 92, and 78. What is the average score?	Add the scores of the students. So, 72 + 85 + 90 + 92 + 78 = 417. Now divide the total by the number of students, which is 5. So, 417 / 5 = 83.4. #### 83.4
A car covers a distance of 120 km in 4 hours. How many km will it cover in 7 hours?	The car covers 120 km in 4 hours. So, the speed of the car is 120 / 4 = 30 km per hour. In 7 hours, it will cover 30 * 7 = 210 km. #### 210
A rectangular swimming pool is 20 meters long and 15 meters wide. If it is 3 meters deep, what is the volume of the pool?	The volume of the pool is Length * Width * Depth = 20 * 15 * 3 = 900. #### 900
A student has 12 pencils in his pencil case, and he wants to share them equally among his 4 friends. How many pencils will each friend get?	First, add the number of pencils and the number of friends. 12 pencils ÷ 4 friends = 3 pencils per friend. #### 3
A bakery is making 250 loaves of bread per hour. How many loaves of bread can it make in 5 hours?	Multiply the number of loaves per hour by the number of hours. 250 loaves/hour × 5 hours = 1250 loaves. #### 1250
A car is traveling from City A to City B. It takes 4 hours to travel 200 miles. How many miles does it travel per hour?	Divide the distance traveled by the time taken. 200 miles ÷ 4 hours = 50 miles per hour. #### 50
A room has 8 chairs in it, and 2 more chairs are added. What percentage of the original number of chairs are the new chairs?	First, find the difference between the new number of chairs and the original number of chairs. 10 chairs - 8 chairs = 2 additional chairs. Then, divide the difference by the original number of chairs and multiply by 100. (2 ÷ 8) × 100 = 25%. #### 25
A person wants to buy 3 books that cost $15 each and 2 CDs that cost $8 each. How much will it cost in total?	Multiply the number of books by their cost and multiply the number of CDs by their cost. Then, add the costs. 3 books × $15 = $45, 2 CDs × $8 = $16, $45 + $16 = $61. #### 61
A bookshelf has {}5 shelves, and each shelf can hold {}8 books. If the bookshelf is currently empty, how many books can be placed on it in total?	There are 5 shelves and each shelf can hold 8 books. Therefore, the total number of books that can be placed on the bookshelf is 5 * 8 = 40. #### 40
Rudy has $4500 invested in a savings account earning 4% annual interest. How much will Rudy have in his account after 3 years?	Rudy has $4500 invested, and it earns 4% annual interest. Therefore, after 3 years, his investment will be worth $4500 * (1 + 0.04)^3 = $5094.56. #### 5094
A rectangular prism has a length of {}6cm, a width of {}4cm, and a height of {}3cm. What is the volume of the prism?	The volume of a rectangular prism is calculated by multiplying the length, width, and height. Therefore, the volume is 6 * 4 * 3 = 72. #### 72
A group of students wants to know the probability of rolling a number less than or equal to 4 on a six-sided fair die. What is the probability?	There are 6 possible outcomes on a six-sided die. The outcomes less than or equal to 4 are 1, 2, 3, and 4. Therefore, the probability is 4/6 = 2/3. #### 0.67
Tim has {}9 boxes of cereal in his pantry. Each box contains {}2 bags of cereal. How many bags of cereal does Tim have in total?	Tim has 9 boxes of cereal, and each box contains 2 bags. Therefore, the total number of bags of cereal is 9 * 2 = 18. #### 18
A bakery has 8 apple pies, 12 cherry pies, and 10 blueberry pies. What is the probability of randomly selecting a blueberry pie?	Total number of pies = 8 + 12 + 10 = 30. Number of blueberry pies = 10. Probability = Number of blueberry pies / Total number of pies = 10 / 30 = 1 / 3. #### 1/3
The perimeter of a square is 32 cm. What is the length of one side of the square?	Perimeter of a square = 4 × side. 32 = 4 × side. Side = 32 / 4 = 8. #### 8
A quadrilateral has angles of 70°, 80°, 90°, and x. What is the value of x?	Sum of angles in a quadrilateral = 360°. 70° + 80° + 90° + x = 360°. Simplify: 240° + x = 360°. x = 360° - 240° = 120°. #### 120
The average of 7 numbers is 15. If 4 of the numbers are 10, 12, 18, and 20, what is the average of the remaining three numbers?	Total sum of 7 numbers = Average × Number of numbers = 15 × 7 = 105. Total sum of 4 given numbers = 10 + 12 + 18 + 20 = 60. Total sum of remaining 3 numbers = 105 - 60 = 45. Average of remaining 3 numbers = 45 / 3 = 15. #### 15
A bookstore claims that 85% of their customers purchased a certain book. What is the probability that a randomly selected customer also purchased the book?	Probability = 85%. Simplify: Probability = 0.85. #### 0.85
In the figure, DE is a straight line and angle F is 30 degrees. What is the measure of angle E?	Since DE is a straight line, angle F + angle E = 180 degrees. So, angle E = 180 - 30 = 150 degrees. #### 150
A bicycle travels from Town A to Town B at an average speed of 30 km/h and returns at an average speed of 20 km/h. What is the average speed for the round trip?	Let the distance from Town A to Town B be x km. Then, time taken to travel from A to B is x/30 hours. Time taken to travel from B to A is x/20 hours. Average speed for the round trip is total distance / total time taken. So, average speed = 2x / (x/30 + x/20) = 2x / (2x/60 + x/20) = 2x / (x/30 + x/20) = 2x / (7x/60) = 24 * 10 / 7 = 34.29 km/h (approximately). #### 34
Tom is planning a road trip from Town A to Town C. If the distance between Town A and Town C is 480 miles and he drives at a constant speed of 60 miles per hour, how many hours will he take to cover the distance?	Time = distance / speed = 480 miles / 60 miles per hour = 8 hours. #### 8
If Jack has 20 packets of biscuits, and each packet has 6 biscuits, how many biscuits does Jack have in total?	Jack has 20 packets of biscuits and each packet has 6 biscuits. So, total number of biscuits = 20 * 6 = 120 biscuits. #### 120
A library sells 40 books at $5 each. What is the total amount of money the library earns?	The library sells 40 books at $5 each. So, total amount earned = 40 * $5 = $200. #### 200
A bookstore sells 500 copies of a new novel on a certain day. If the profit on each copy is 15% of the selling price, and the selling price of each copy is $5, what is the total profit of the bookstore?	The profit on each copy is 15% of $5, which is $5 x 0.15 = $0.75. The bookstore sells 500 copies, so the total profit is $0.75 x 500 = $375. #### 375
A car travels 480 miles in 8 hours. If it travels at a constant speed, how many miles does it travel per hour?	The car travels 480 miles in 8 hours. To find the speed per hour, divide the total distance by the total time: 480 / 8 = 60. #### 60
A pizza parlor sells a total of 320 small and large pizzas on Friday. If the number of large pizzas sold is 80, how many small pizzas were sold?	The total number of pizzas sold is 320. The number of large pizzas sold is 80. To find the number of small pizzas sold, subtract the number of large pizzas from the total: 320 - 80 = 240. #### 240
A carpet has 240 square feet of surface area. If it is 8 feet wide, what is its length?	The carpet has a surface area of 240 square feet. If it is 8 feet wide, the length can be found by dividing the surface area by the width: 240 / 8 = 30. #### 30
A farmer has 300 apples in a basket. If 20% of the apples are rotten, how many good apples does the farmer have?	The farmer has 300 apples. 20% of the apples are rotten, so the number of rotten apples is 300 x 0.2 = 60. The number of good apples is the total number of apples minus the number of rotten apples: 300 - 60 = 240. #### 240
A fair eight-sided die is rolled. What is the probability that the number rolled is less than 5?	The total number of outcomes is 8. The number of outcomes less than 5 is 4. The probability is the number of outcomes less than 5 divided by the total number of outcomes, which is 4/8 = 1/2 = 0.5. ####0.5
Alex can type 30 words per minute. How many words can she type in 9 minutes?	Alex can type 30 words per minute. In 9 minutes, she can type 9 x 30 = 270 words. ####270
A triangle has angles of 45 degrees, 75 degrees, and x degrees. What is the value of x?	The sum of the angles of a triangle is 180 degrees. So, 45 + 75 + x = 180. Subtracting 45 and 75 from both sides, we get x = 180 - 45 - 75 = 60. ####60
Jack has 7 groups of 2 pencils in his pencil case. How many pencils does Jack have in total?	There are 7 groups of 2 pencils. So, Jack has 2 x 7 = 14 pencils in total. ####14
In a right triangle, the length of the hypotenuse is 7 and one of the legs is 2. What is the length of the other leg?	Using Pythagoras' theorem, we get (2)^2 + (other leg)^2 = (7)^2. So, (other leg)^2 = (7)^2 - (2)^2 = 49 - 4 = 45. Taking the square root of both sides, we get other leg = √45 = 3√5. ####3√5
What is the value of y in the equation 2y - 4 = 10?	Add 4 to both sides of the equation, resulting in 2y = 14. Divide both sides by 2, resulting in y = 7. #### 7
A bookstore has 120 books on a shelf. If they want to put the same number of books on 5 shelves, how many books will they need in total?	Multiply the number of books per shelf by the number of shelves, resulting in 120 x 5 = 600. #### 600
A factory produces 400 containers of juice in a day. If each container holds 3/4 liter of juice, how many liters of juice does the factory produce in a day?	Multiply the number of containers by the capacity of each container, resulting in 400 x 3/4 = 300. #### 300
Tom has 24 pairs of socks in his drawer. If he donates 1/3 of his socks to charity, how many pairs of socks will he have left?	Divide the total number of socks by 3, resulting in 24 / 3 = 8. Subtract the donated socks from the total, resulting in 24 - 8 = 16. #### 16
A car travels 250 miles in 5 hours. How many miles does it travel per hour?	Divide the total distance by the time, resulting in 250 / 5 = 50. #### 50
A water tank can hold 480 gallons of water. If 3/8 of the tank is filled with water, how many gallons of water are in the tank?	480 x (3/8) = 180 ####
A bakery is having a sale where a customer can buy 2 cakes for $15. What is the cost of 5 cakes at this sale?	The cost of 2 cakes is $15. So, the cost of 1 cake is $15/2 = $7.5. The cost of 5 cakes is 5 x $7.5 = $37.5 ####
A telephone company charges a fixed rate of $25 plus an additional $0.05 per minute. If a call lasted for 30 minutes, what is the total cost of the call?	The fixed rate is $25. The additional charge is 30 x $0.05 = $1.5. The total cost is $25 + $1.5 = $26.5 ####
In the figure above, what is the value of y?	Since x + y + 90 = 180, y = 180 - 90 - 45 = 45 ####
A group of friends want to share some candies equally. If they have 48 candies and there are 8 friends, how many candies will each friend get?	48 / 8 = 6 ####
In a bookshelf, 18 books are fiction and 12 are non-fiction. If 5 books are both fiction and non-fiction, how many books are on the bookshelf?	Let's start by finding the total number of fiction books. Since 5 books are both fiction and non-fiction, that means there are 18 - 5 = 13 fiction-only books. Similarly, there are 12 - 5 = 7 non-fiction-only books. Now, we add up the fiction-only, non-fiction-only, and the books that are both: 13 + 7 + 5 = 25. #### 25
A store sells a total of 120 pairs of shoes per day. They sell a combination of sneakers and boots. If they sell 20 more pairs of sneakers than boots, and they sell 70 pairs of sneakers, how many pairs of boots do they sell?	Let's start by using the information that they sell 20 more pairs of sneakers than boots. Let x be the number of pairs of boots. Then, they sell x + 20 pairs of sneakers. Since they sell a total of 120 pairs of shoes, we set up the equation: x + (x + 20) = 120. Solving for x, we get: x + x + 20 = 120 => 2x + 20 = 120 => 2x = 100 => x = 50. #### 50
A rectangular garden has a length of 15 meters and a width of 8 meters. What is its perimeter?	The perimeter of a rectangle is given by the formula: perimeter = 2 * (length + width). Plugging in the values, we get: perimeter = 2 * (15 + 8) = 2 * 23 = 46. #### 46
In a right triangle, the length of the hypotenuse is 12 cm and one of the legs is 9 cm. What is the length of the other leg?	We can use the Pythagorean theorem to solve this problem. Let x be the length of the other leg. Then, we have the equation: x^2 + 9^2 = 12^2 => x^2 + 81 = 144 => x^2 = 63 => x = sqrt(63) = 3 sqrt(7). #### 3 sqrt(7)
In a set of 40 students, 28 speak Spanish, 20 speak English, and 10 speak both languages. What is the probability that a student speaks at least one language?	First, let's find the number of students who speak at least one language. We can do this by adding the number of students who speak Spanish and the number of students who speak English, and then subtracting the number of students who speak both languages: 28 + 20 - 10 = 38. Now, we can find the probability: probability = number of students who speak at least one language / total number of student…
A t-shirt company produces 240 t-shirts per hour. How many t-shirts does the company produce in 5 hours?	To find the total number of t-shirts produced, we multiply the number of t-shirts produced per hour by the number of hours. Thus, we have 240 * 5 = 1200. #### 1200
A car is traveling at a speed of 75 km/h. How far does it travel in 2.5 hours?	To find the total distance traveled, we multiply the speed by the time. Thus, we have 75 * 2.5 = 187.5. #### 187.5
In a basket, there are 18 apples. If 2/3 of the apples are red, how many red apples are there in the basket?	To find the number of red apples, we multiply the total number of apples by the fraction of red apples. Thus, we have 18 * (2/3) = 12. #### 12
A rectangular prism has a length of 6 cm, a width of 4 cm, and a height of 3 cm. What is its volume?	To find the volume, we multiply the length, width, and height. Thus, we have 6 * 4 * 3 = 72. #### 72
A bicycle is on sale for 15% off its original price of $120. How much will you pay for the bicycle?	To find the discount amount, we multiply the original price by the percentage discount. Thus, we have 120 * (15/100) = 18. Then, we subtract the discount amount from the original price to get the sale price. Thus, we have 120 - 18 = 102. #### 102
What is the sum of interior angles in a quadrilateral if three interior angles have measures of 90°, 60°, and x?	The sum of interior angles in a quadrilateral is 360°. So, 90 + 60 + x + ? = 360. Therefore, x + ? = 210. So, the fourth angle is 210 - x. The sum of interior angles is 360.
A group of 4 friends - Jack, Kelly, Liam, and Michael - are going to a concert. If they are seated in a row, and Jack and Kelly are seated next to each other, how many different seating arrangements are possible?	We can place Jack and Kelly together in one of 2 ways. Then we can arrange the remaining 2 friends in 2! ways, and finally, we place the group of Jack and Kelly in 3 positions. Thus, the total number of arrangements is 2 * 2! * 3 = 12. #### 12
In a circle, the ratio of the lengths of the arcs is 3:4. If the shorter arc has a length of 9π, what is the length of the longer arc?	The ratio of the lengths of the arcs is 3:4. So, the length of the longer arc is 9π * 4/3 = 12π. #### 12
What is the value of z, if z / 2 = 7?	We have z / 2 = 7. Multiplying both sides by 2, we get z = 7 * 2 = 14. #### 14
Emily has 20 bags of sugar to pack into boxes of 4 bags each. How many boxes of sugar can Emily make?	Emily has 20 bags of sugar to pack into boxes of 4 bags each. She can make 20 / 4 = 5 boxes of sugar. #### 5
A small bookstore has 240 books on its shelves, and it wants to put them into boxes that can hold 8 books each. How many boxes will the bookstore need?	The bookstore needs to divide the total number of books by the number of books each box can hold. 240 divided by 8 is 30. #### 30
A bag contains 3 yellow marbles, 5 black marbles, and 2 white marbles. If 3 marbles are drawn at random, what is the probability that all 3 are black?	The total number of marbles is 3 + 5 + 2 = 10. The number of ways to draw 3 black marbles is 5C3 = 10. The total number of ways to draw 3 marbles is 10C3 = 120. The probability is 10/120 = 1/12. #### 1/12
Alex can clean a house in 5 hours and her sister Mia can clean the same house in 7 hours. If both Alex and Mia work together, how many hours will it take them to clean the house?	Alex can clean the house in 5 hours, so her rate of cleaning is 1/5 of the house per hour. Mia can clean the house in 7 hours, so her rate of cleaning is 1/7 of the house per hour. Together, their rate of cleaning is 1/5 + 1/7 = 12/35 of the house per hour. To find the time it takes them to clean the house, we divide 1 by their combined rate. This gives us 35/12 hours. To simplify, we can divide …
A rabbit is at the bottom of a 16-foot hole. Each day, it climbs up 2 feet, but at night, it slips back 1 foot. How many days will it take for the rabbit to reach the top of the hole?	Each day, the rabbit climbs a net of 2 - 1 = 1 foot. To find the number of days it takes to climb 16 feet, we divide 16 by 1. This gives us 16 days. #### 16
What is the standard deviation of the dataset 3, 5, 7, 9, 11?	First, we find the mean of the dataset. This is (3 + 5 + 7 + 9 + 11)/5 = 35/5 = 7. Next, we find the squared difference from the mean for each data point: (3-7)^2 = 16, (5-7)^2 = 4, (7-7)^2 = 0, (9-7)^2 = 4, (11-7)^2 = 16. The variance is the average of these squared differences: (16 + 4 + 0 + 4 + 16)/5 = 40/5 = 8. The standard deviation is the square root of the variance: √8 = 2.83. #### 2.83
A bookshelf has 5 shelves, and each shelf can hold 8 books. If the bookshelf is currently empty, how many books can be placed on it in total?	First, multiply the number of shelves by the number of books each shelf can hold. This will give you the total number of books the bookshelf can hold. 5 * 8 = 40. #### 40
A group of friends want to share 18 cookies equally. If there are 3 friends, how many cookies will each friend get?	Divide the total number of cookies by the number of friends. 18 / 3 = 6. #### 6
A bicycle is on sale for 15% off. If the original price is 80 dollars, how much will you pay for the bicycle?	First, find 15% of the original price by multiplying it by 0.15. 80 * 0.15 = 12. Then, subtract this amount from the original price. 80 - 12 = 68. #### 68
A rectangular garden measures 10 meters by 5 meters. If a path that is 1 meter wide is built around the garden, what is the area of the path?	First, find the area of the garden. 10 * 5 = 50. Then, find the area of the larger rectangle formed by the garden and the path. The length and width of this rectangle are 10 + 2 and 5 + 2, respectively. (10 + 2) * (5 + 2) = 168. Finally, subtract the area of the garden from the area of the larger rectangle. 168 - 50 = 118. #### 118
A car travels from City A to City B at an average speed of 60 km/h and returns at an average speed of 40 km/h. What is the average speed of the car for the round trip?	First, find the total distance traveled. Since the car travels from City A to City B and back, the total distance is twice the distance between the two cities. Let this distance be x. Then, the total distance is 2x. The total time taken is the time taken to travel from City A to City B plus the time taken to travel from City B to City A. This is (x/60) + (x/40). To find the average speed, divide …
A library has a total of 480 books on two shelves. The number of books on the first shelf is 120 more than the number of books on the second shelf. How many books are on the second shelf?	Let's say the number of books on the second shelf is x. Then, the number of books on the first shelf is x + 120. Since the total number of books is 480, we can set up the equation: x + (x + 120) = 480. Simplify the equation: 2x + 120 = 480. Subtract 120 from both sides: 2x = 360. Divide both sides by 2: x = 180. #### 180
The length of a rectangle is 8 meters, and its area is 48 square meters. What is the width of the rectangle?	Let's say the width of the rectangle is x. The area of the rectangle is length multiplied by width, so we can set up the equation: 8x = 48. Divide both sides by 8: x = 6. #### 6
A bookstore sells 180 novels per week. If each novel costs $15, how much does the bookstore earn per week?	Multiply the number of novels sold by the cost of each novel: 180 x $15 = $2,700. #### 2700
Tom is 5 years older than Alex. If Tom is 20 years old, how old is Alex?	Let's say Alex's age is x. Then, Tom's age is x + 5. Since Tom is 20 years old, we can set up the equation: x + 5 = 20. Subtract 5 from both sides: x = 15. #### 15
A cyclist travels from city A to city B at an average speed of 45 km/h and returns at an average speed of 30 km/h. What is the average speed of the cyclist for the entire trip?	Let's say the distance between city A and city B is x km. The time taken to travel from A to B is x / 45 hours, and the time taken to return is x / 30 hours. The total distance traveled is 2x km, and the total time taken is x / 45 + x / 30 hours. Simplify the expression: (2x) / ((x/45) + (x/30)). Multiply numerator and denominator by 90 to eliminate fractions: (180x) / (2x + 3x). Combine like ter…
A bakery sells a total of 480 muffins and cakes on a certain day. If the ratio of muffins to cakes is 3:5, how many cakes were sold?	If the ratio of muffins to cakes is 3:5, the total parts is 3+5 = 8. The total muffins and cakes sold is 480. If we divide 480 by 8, we get 60. This is the value of 1 part. Since the question asks for number of cakes, we need to multiply 5 (the part for cakes) by 60 (the value of 1 part). 5 x 60 = 300. #### 300
A basketball player makes 35% of his three-point shots. If he attempted 60 shots, how many three-point shots did he make?	The percentage of three-point shots he made is 35% = 35/100. If he attempted 60 shots, then he made 60 * 35/100 = 21 shots. #### 21
In a pile of coins, 45 are nickels, 30 are dimes, and the rest are quarters. If there are 105 coins in total, what is the probability of randomly drawing a quarter?	There are 105 coins in total. 45 are nickels and 30 are dimes, so there are 105 - 45 - 30 = 30 quarters. The probability of randomly drawing a quarter is then 30 / 105 = 2 / 7. #### 2/7
A factory produces 540 toys per day. They operate 2 machines. Machine A produces 240 toys per day while Machine B produces 120 toys per day. How many more toys per day will they produce if they add a third machine that produces 100 toys per day?	The total number of toys produced is 540 per day. Machine A produces 240 toys and Machine B produces 120 toys, so together they produce 240 + 120 = 360 toys. The third machine produces 100 toys per day. So, the total number of toys produced after adding the third machine is 360 + 100 = 460. The difference in the number of toys produced is 460 - 540 = 80 toys per day less. #### -80
A group of students want to find the probability of rolling a number less than or equal to 4 on a six-sided fair die. What is the probability?	There are 6 possible outcomes: 1, 2, 3, 4, 5, and 6. There are 4 outcomes that are less than or equal to 4: 1, 2, 3, and 4. The probability of rolling a number less than or equal to 4 is then 4 / 6 = 2 / 3. #### 2/3
Tom can mow the lawn in 5 hours, and his brother Alex can mow the same lawn in 3 hours. How many hours will it take for both Tom and Alex to mow the lawn together?	Let's first find the total work to be done, which is 1 lawn. Then, find the work Tom can do per hour, which is 1 lawn / 5 hours = 1/5 lawn per hour. Next, find the work Alex can do per hour, which is 1 lawn / 3 hours = 1/3 lawn per hour. Then, find the combined work they can do per hour, which is (1/5 + 1/3) lawn per hour = 8/15 lawn per hour. Finally, find the time it takes for them to mow the l…
A bookstore has 300 books on a shelf. If they add 25 more books and then remove 15 books, what is the new total number of books on the shelf?	First, find the total number of books initially, which is 300 books. Then, add 25 more books, which results in 300 + 25 = 325 books. Next, remove 15 books, which results in 325 - 15 = 310 books. #### 310
A car travels from City A to City B at an average speed of 60 kilometers per hour. If the distance between the cities is 480 kilometers, how many hours will the trip take?	Find the time it takes for the trip by dividing the distance by the speed, which is 480 kilometers / 60 kilometers per hour = 8 hours. #### 8
A group of students want to share some money equally. If they have $240 and there are 8 students, how much money will each student get?	Divide the total money by the number of students to find out how much each student will get, which is $240 / 8 = $30. #### 30
A factory produces 420 units of a product per day. If they increase the production by 20 units per day, what is the new total number of units produced per day?	Find the new total number of units produced per day by adding the increase to the initial production, which is 420 + 20 = 440 units per day. #### 440
A consumer electronics company sells a total of 2100 laptops in two months. If they sell 400 more in the first month than the second, how many laptops did they sell in the second month?	Let x be the number of laptops sold in the second month. The number of laptops sold in the first month is x + 400. The total number of laptops sold is x + x + 400. This equals 2100. Therefore, 2x + 400 = 2100. 2x = 1700. x = 850. #### 850
A basket contains 12 apples, 8 oranges, and 4 bananas. What is the probability of drawing an apple at random?	There are a total of 12 + 8 + 4 fruits, which equals 24. The number of apples is 12. The probability of drawing an apple at random is 12/24, which equals 1/2. #### 1/2
The ratio of cats to dogs in a pet store is 2:3. If the store has 30 animals, how many dogs are there?	The ratio of cats to dogs is 2:3, which equals 2x:3x. The total number of animals is 2x + 3x, which equals 30. 5x = 30. x = 6. The number of dogs is 3x, which equals 3*6, or 18. #### 18
A taxi company charges a base fare of 5 dollars plus 2.5 dollars per mile. If the total fare is 20 dollars, how many miles did the taxi travel?	If the taxi traveled x miles, then the total fare is 5 + 2.5*x. This equals 20. 2.5*x = 15. x = 6. #### 6
A chocolate factory produces 32,000 pieces of candy in 8 hours. How many pieces of candy do they produce per hour?	If the factory produces x pieces of candy per hour, then they produce 8x pieces in 8 hours. 8x = 32000. x = 4000. #### 4000
Alex has 9 more pencils than his 12 books. If Alex gives 3 pencils to his sister, what is the difference between the number of pencils and books Alex has now?	Alex originally has 9 + 12 = 21 pencils and 12 books. After giving 3 pencils to his sister, he has 21 - 3 = 18 pencils. The difference between the number of pencils and books Alex has now is 18 - 12 = 6. #### 6
A box contains 8 red markers, 11 blue markers, and 5 green markers. If a marker is drawn at random, what is the probability that it is not green?	There are 8 + 11 + 5 = 24 markers in total. The probability that it is not green is the number of non-green markers divided by the total number of markers. The number of non-green markers is 24 - 5 = 19. The probability is 19/24. #### 19/24
Benny has been saving 30 dollars each month for 4 months. If Benny decides to buy a bike that costs 140 dollars, how much more money will Benny need to save?	Benny has saved 30 * 4 = 120 dollars. If he decides to buy a bike that costs 140 dollars, he still needs to save 140 - 120 = 20 dollars. #### 20
In a rectangle, the length is 12 cm and the width is 7 cm. What is the perimeter of the rectangle?	The perimeter of a rectangle is the sum of the lengths of all its sides. The perimeter is 2 x (length + width) = 2 x (12 + 7) = 2 x 19 = 38 cm. #### 38
David has 21 more marbles than his 18 stickers. If David gives 5 marbles to his brother, how many more marbles does David have than stickers?	David originally has 21 + 18 = 39 marbles and 18 stickers. After giving 5 marbles to his brother, he has 39 - 5 = 34 marbles. David has 34 - 18 = 16 more marbles than stickers. #### 16
What is the sum of the interior angles of a triangle?	The sum of the interior angles of a triangle is 180 degrees. To find the sum, we can use the formula: sum = (n - 2) x 180, where n is the number of sides. For a triangle, n = 3. So, sum = (3 - 2) x 180 = 180. #### 180
A water tank can hold 24000 liters of water. If 18000 liters of water are already in the tank, how much more water can be filled in the tank?	To find the amount of water that can be filled in the tank, we need to subtract the amount of water already in the tank from the total capacity of the tank. 24000 - 18000 = 6000. #### 6000
A bakery sells 250 loaves of bread per day. If the bakery operates 7 days a week, how many loaves of bread does it sell in a week?	To find the number of loaves of bread sold in a week, we can multiply the number of loaves sold per day by the number of days. 250 x 7 = 1750. #### 1750
The area of a rectangle is 48 square meters. If the length of the rectangle is 6 meters, what is the width of the rectangle?	To find the width of the rectangle, we can use the formula: area = length x width. Given that the area is 48 and the length is 6, we can set up the equation: 48 = 6 x width. To solve for width, we can divide both sides by 6. width = 48 / 6 = 8. #### 8
A car travels from City A to City B at an average speed of 75 kilometers per hour. The distance between the two cities is 375 kilometers. How long will the trip take?	To find the time taken for the trip, we can use the formula: time = distance / speed. Given that the distance is 375 and the speed is 75, we can plug in the values: time = 375 / 75 = 5. #### 5
Tom has 15 bags of oranges. Each bag contains 9 oranges. How many oranges does Tom have in total?	To find the total number of oranges, multiply the number of bags by the number of oranges in each bag. This gives 15 * 9 = 135. #### 135
A bookstore has 12 shelves of books, and each shelf can hold 4 rows of books. If the bookstore wants to arrange the books in 3 equal sections, how many rows of books can each section have?	First, find the total number of rows of books by multiplying the number of shelves by the number of rows each shelf can hold. This gives 12 * 4 = 48 rows. Then, divide the total number of rows by the number of sections to find the number of rows each section can have. This gives 48 / 3 = 16. #### 16
What is the surface area of a cube that has a side length of 5 cm?	The surface area of a cube is given by 6 * side^2. This gives 6 * 5^2 = 6 * 25 = 150. #### 150
The probability of a student passing a math test is 0.8. What is the probability that the student will not pass?	The probability that the student will not pass is given by 1 - probability of passing. This gives 1 - 0.8 = 0.2. #### 0.2
Rachel used 24 cups of flour to bake 4 batches of cookies. How many cups of flour did Rachel use to bake each batch?	To find the number of cups of flour used per batch, divide the total number of cups by the number of batches. This gives 24 / 4 = 6. #### 6
If a water tank can hold 1000 liters of water and 250 liters of water can fill 5 small buckets, how many buckets can be filled with the water in the tank?	If 250 liters of water can fill 5 small buckets, then 1 bucket requires 250/5 = 50 liters of water. Since the tank has 1000 liters of water, it can fill 1000/50 = 20 buckets. #### 20
What is the probability of drawing a yellow or a red pencil from a bag containing 7 yellow pencils, 5 red pencils, and 3 blue pencils?	There are a total of 7 + 5 + 3 = 15 pencils in the bag. 7 yellow pencils and 5 red pencils make a total of 12 yellow or red pencils. So, the probability is 12/15 = 4/5. #### 4/5
David scored 50, 40, and 60 on his last three math tests. What is his average score?	To find the average, add the scores and divide by the number of tests. (50 + 40 + 60) / 3 = 150 / 3 = 50. #### 50
Sam can mop a floor in 2 hours and his friend Alex can mop the same floor in 3 hours. If both Sam and Alex work together, how many hours will it take them to mop the floor?	If Sam can mop the floor in 2 hours, he can mop half the floor in 1 hour. If Alex can mop the floor in 3 hours, he can mop one-third of the floor in 1 hour. Together, they can mop half + one-third = 3/6 + 2/6 = 5/6 of the floor in 1 hour. So, they can mop the entire floor in 6/5 = 1.2 hours. #### 1.2
A box contains 3 black balls, 5 white balls, and 2 gray balls. What is the probability that a randomly selected ball is not gray?	There are a total of 3 + 5 + 2 = 10 balls in the box. 3 black balls and 5 white balls make a total of 8 balls that are not gray. So, the probability is 8/10 = 4/5. #### 4/5
A boat travels from Town A to Town B at an average speed of 45 km/h and returns at an average speed of 30 km/h. What is the average speed for the entire trip?	Let's assume the distance between Town A and Town B is x km. The time taken to travel from Town A to Town B is x/45 hours, and the time taken to travel from Town B to Town A is x/30 hours. The total distance traveled is 2x km, and the total time taken is x/45 + x/30 hours. We can find the average speed by dividing the total distance by the total time. Average speed = 2x / (x/45 + x/30) = 36 km/h …
The average of 7 numbers is 35. If the average of 4 of the numbers is 32, what is the average of the remaining 3 numbers?	Let the 4 numbers be a, b, c, and d, and let the remaining 3 numbers be e, f, and g. The average of the 7 numbers is (a + b + c + d + e + f + g) / 7 = 35. We know that (a + b + c + d) / 4 = 32. Simplifying, we get a + b + c + d = 128. Substituting this into the first equation, we get 128 + e + f + g = 245. The average of the remaining 3 numbers is (e + f + g) / 3 = (245 - 128) / 3 = 39 #### 39
In a cube, all 12 edges are labeled. What is the number of ways to choose 2 edges such that they do not form a face diagonal?	There are 12 edges in the cube. The number of ways to choose 2 edges is 12C2 = 66. The number of face diagonals in the cube is 12. The number of ways to choose 2 edges that form a face diagonal is 12. Therefore, the number of ways to choose 2 edges such that they do not form a face diagonal is 66 - 12 = 54 #### 54
A cylinder has a radius of 4 inches and a height of 12 inches. What is the volume of the cylinder?	The formula for the volume of a cylinder is V = πr^2h, where r is the radius and h is the height. Plugging in the values, we get V = π(4)^2(12) = 192π cubic inches. Simplifying, we get V ≈ 603.19 cubic inches ≈ 603 #### 603
In a set of 70 students, 45 speak Spanish, 30 speak Portuguese, and 20 speak both languages. What is the probability that a student speaks at least one language?	The number of students who speak at least one language is 45 + 30 - 20 = 55. The probability that a student speaks at least one language is 55/70 = 11/14 ≈ 0.786 #### 0.786
A swimming pool is 15 meters long, 8 meters wide, and 3 meters deep. If the pool is filled with water, what is the volume of the water?	The volume of the water is calculated by the formula: Volume = Length x Width x Depth. Plugging in the values, we get: Volume = 15 x 8 x 3 = 360 cubic meters. #### 360
A train travels from Station A to Station B. If the distance between the two stations is 360 kilometers and the train is traveling at a speed of 60 kilometers per hour, how many hours will it take to reach Station B?	The time taken to reach Station B is calculated by the formula: Time = Distance / Speed. Plugging in the values, we get: Time = 360 / 60 = 6 hours. #### 6
A bookstore is having a sale on books. If a customer buys 3 books, they get a 4th book for 25% off. If the price of each book is $15, how much will a customer pay for 4 books?	The price of the 4th book is 25% off, so the customer will pay 75% of the original price, which is 0.75 x $15 = $11.25. The total cost is the sum of the prices of the 3 original books and the discounted 4th book: $15 x 3 + $11.25 = $56.25. #### 56.25
A circular fountain measures 12 meters in diameter. If a path that is 2 meters wide is built around the fountain, what is the area of the path?	First, we need to find the radius of the fountain, which is half the diameter: Radius = 12 / 2 = 6 meters. The area of the fountain is calculated by the formula: Area = π x Radius^2. Plugging in the values, we get: Area = π x 6^2 = 113.04 square meters. The area of the path is the difference between the area of the outer circle (with radius 6 + 2 = 8 meters) and the area of the inner circle: Area…
A cyclist travels from Town A to Town B at 30 km/h and returns at 45 km/h. What is the average speed for the round trip?	Let the distance between the two towns be x. The time taken to travel from Town A to Town B is x / 30 hours, and the time taken to return is x / 45 hours. The total time taken is the sum of these two times: Total time = x / 30 + x / 45. To find the average speed, we need to find the total distance and total time, and then divide the total distance by the total time: Average speed = 2x / (x / 30 +…
There are 15 students in a class. The number of ways to select a team of 4 students is?	To find the number of ways, we use the combination formula: C(n, k) = n! / (k!(n-k)!), where n is the total number of students and k is the number of students to be selected. Plugging in the values, we get: C(15, 4) = 15! / (4!(15-4)!) = 15! / (4!11!) = 15 × 14 × 13 × 12 / 4 × 3 × 2 × 1 = 3,435. #### 3435
The ratio of red to blue marbles in a bag is 2:5. If the bag has 42 marbles, how many blue marbles are there?	Let's assume the number of red marbles is 2x and the number of blue marbles is 5x. The total number of marbles is 42, so 2x + 5x = 42. Combining like terms, we get: 7x = 42. Dividing both sides by 7 gives x = 6. Now, we can find the number of blue marbles: 5x = 5 × 6 = 30. #### 30
A plane is flying from City A to City B at an average speed of 480 km/h. The distance between the two cities is 1,920 km. How long will the flight take?	To find the time, we can use the formula: Time = Distance / Speed. Plugging in the values, we get: Time = 1,920 km / 480 km/h = 4 hours. #### 4
What is the probability of obtaining exactly two heads when flipping four fair coins?	The total number of possible outcomes when flipping four coins is 2^4 = 16. The number of ways to get exactly two heads is C(4, 2) = 4! / (2!(4-2)!) = 4! / (2!2!) = 6. The probability is the number of favorable outcomes divided by the total number of outcomes: Probability = 6 / 16 = 3/8. #### 3/8
What is the value of y if 5y - 2 = 13?	To solve for y, add 2 to both sides of the equation: 5y - 2 + 2 = 13 + 2, which gives 5y = 15. Now, divide both sides by 5: 5y / 5 = 15 / 5, which gives y = 3. #### 3
Alex has 12 boxes of pencils. He needs to put 7 pencils in each box to give to a class of students. How many pencils does Alex need?	Start by multiplying the number of boxes by the number of pencils per box. 12 * 7 = 84. So, Alex needs 84 pencils. #### 84
A storage room has 3 shelves, and each shelf can hold 10 boxes. If the storage room is currently empty, how many boxes can be placed on it in total?	Start by multiplying the number of shelves by the number of boxes per shelf. 3 * 10 = 30. So, the storage room can hold 30 boxes in total. #### 30
A jar contains 5 red marbles, 8 blue marbles, and 3 green marbles. What is the probability that a randomly selected marble is not green?	First, find the total number of marbles. 5 + 8 + 3 = 16. Then, find the number of marbles that are not green. 16 - 3 = 13. Finally, calculate the probability. 13/16. So, the probability of not selecting a green marble is 13/16. #### 13/16
A garden center sells a total of 240 plants on Monday and Tuesday. They sell 60 more on Monday than Tuesday. How many plants did they sell on Tuesday?	Let x be the number of plants sold on Tuesday. Then, the number of plants sold on Monday is x + 60. The total is 240. So, x + (x + 60) = 240. This means 2x + 60 = 240. Subtract 60 from both sides. 2x = 180. Divide both sides by 2. x = 90. So, they sold 90 plants on Tuesday. #### 90
12 in base 9 is equal to what in base 10?	In base 9, 12 represents the number 1*9 + 2*1 = 11. So, 12 in base 9 is equal to 11 in base 10. #### 11
In a bookshelf, the ratio of fiction to non-fiction books is 2:3. If there are 300 books in the bookshelf, how many non-fiction books are there?	We know that the ratio of fiction to non-fiction books is 2:3, so for every 2 fiction books, there are 3 non-fiction books. We can set up the following equation: 2x + 3x = 300, where x is the number of fiction book groups. Solving this equation gives us x = 60. There are 3 non-fiction books for every group, so the total number of non-fiction books is 3x = 180. #### 180
A factory is producing a special batch of toys for the holiday season. They need to package 480 toys into boxes that hold 8 toys each. How many boxes will they need?	To find the number of boxes needed, we need to divide the total number of toys by the number of toys that can fit in each box. This gives us 480 ÷ 8 = 60. #### 60
The angles of a quadrilateral are in the ratio 1:2:3:4. What is the measure of the smallest angle?	We know that the sum of the angles in a quadrilateral is 360°. Since the angles are in the ratio 1:2:3:4, we can set up the following equation: x + 2x + 3x + 4x = 360, where x is the measure of the smallest angle. Solving this equation gives us x = 40. The smallest angle is x = 40. #### 40
What is the sum of all possible prime factors of the number 540?	The prime factors of 540 are 2, 2, 3, 3, 3, and 5. The sum of these prime factors is 2 + 2 + 3 + 3 + 3 + 5 = 18. #### 18
A bicycle travels from City X to City Y at an average speed of 30 km/h and returns at an average speed of 20 km/h. What is the average speed of the bicycle for the entire trip?	To find the average speed for the entire trip, we need to first find the total distance traveled. Let's assume the distance between City X and City Y is d. Then, the total distance traveled is 2d. The time taken for the trip from City X to City Y is d/30, and the time taken for the return trip is d/20. The total time taken is the sum of these times: (d/30) + (d/20) = (2d + 3d)/60 = 5d/60. The ave…
Sarah can paint a room in 4 hours, and her brother can paint the same room in 6 hours. If they work together, how many hours will it take for them to paint the room?	2.4
A bakery sells 240 loaves of bread per day. If they operate 7 days a week, how many loaves of bread do they sell in a week?	1680
A square has a diagonal of 10 inches. What is the length of one side of the square?	5 sqrt(2)
A car rental company charges $30 per day plus $0.25 per mile. If a customer rented a car for 3 days and drove 120 miles, how much will they have to pay?	120
A water tank can hold 400 gallons of water. If 3/5 of the tank is already filled, how many gallons of water are already in the tank?	240
What is the value of x in the equation 3x - 2 = 7?	To solve for x, add 2 to both sides of the equation: 3x - 2 + 2 = 7 + 2, which simplifies to 3x = 9. Then, divide both sides by 3: x = 9/3. x = 3. #### 3
A group of friends want to split some money equally. If they have $120 and there are 8 friends, how much money will each friend get?	To find the amount each friend will get, divide the total amount of money ($120) by the number of friends (8). This can be represented as $120 ÷ 8 = $15. #### 15
What is the value of x in the equation x/4 + 2 = 5?	To solve for x, subtract 2 from both sides of the equation: x/4 + 2 - 2 = 5 - 2, which simplifies to x/4 = 3. Then, multiply both sides by 4: x = 3 × 4. x = 12. #### 12
A rectangle has a length of 8 cm and a width of 5 cm. What is its perimeter?	To find the perimeter of the rectangle, use the formula P = 2l + 2w, where l is the length and w is the width. Plugging in the values, we get P = 2(8) + 2(5) = 16 + 10 = 26 cm. #### 26
A bookshelf has 5 shelves, and each shelf can hold 8 books. If the bookshelf is currently empty, how many books can be placed on it in total?	To find the total number of books that can be placed on the bookshelf, multiply the number of shelves (5) by the number of books each shelf can hold (8). This can be represented as 5 × 8 = 40. #### 40
On a certain day, 75% of the customers at a grocery store used a coupon. 40% of the 75% also brought a newspaper. If 200 customers were at the store, how many customers brought a newspaper?	The number of customers who used a coupon is 75% of 200, which is 0.75 x 200 = 150. Of these, 40% brought a newspaper, which is 0.40 x 150 = 60 customers. #### 60
What is the sum of the interior angles of a regular hexagon?	A regular hexagon has 6 angles, and each angle is 180 - 120 degrees, which is 60 degrees. The sum of the interior angles is 6 x 60 = 360. #### 360
A cyclist travels from City A to City B at an average speed of 20 km/h and returns at an average speed of 30 km/h. What is the average speed of the cyclist for the round trip?	Let the distance between City A and City B be d. The time taken to travel from A to B is d / 20, and the time taken to travel from B to A is d / 30. The total time is d / 20 + d / 30, which is (3d + 2d) / 60 = 5d / 60. The total distance is 2d, so the average speed is 2d / (5d / 60) = 24. #### 24
There are 8 people in a line, and each person is wearing a hat that has the number 1, 2, 3, 4, 5, 6, 7, or 8 on it. If the sum of the numbers is 36, what number is on the hat worn by the 5th person?	If the sum of the numbers is 36, the average number is 36 / 8 = 4.5. Since the numbers are consecutive, the middle number (4th and 5th) must be 4.5, and the 5th person has the number 5. #### 5
A factory produces a total of 600 chairs and tables on a certain day. The number of chairs produced is 120 more than the number of tables produced. How many tables were produced on that day?	Let the number of tables produced be x. Then, the number of chairs produced is x + 120. The total number of chairs and tables is x + (x + 120) = 600. This gives 2x + 120 = 600, so x = 240. #### 240
A bookshelf has 5 shelves, and each shelf can hold 8 books. If the bookshelf is currently empty, how many books can be placed on it in total?	The total number of books that can be placed is equal to the number of shelves multiplied by the number of books per shelf. 5 * 8 = 40 #### 40
A bakery has 12 bags of flour, each weighing 5 kg. How much does the flour weigh in total?	The total weight of the flour is equal to the number of bags multiplied by the weight per bag. 12 * 5 = 60 #### 60
A person can paint a room in 8 hours. If two people work together, how many hours will it take to paint the room?	If one person can paint the room in 8 hours, then two people can paint the room in half the time. 8 / 2 = 4 #### 4
A car travels from city A to city B at an average speed of 60 km/h. If the distance between the cities is 240 km, how many hours will it take to travel from city A to city B?	The time taken to travel is equal to the distance divided by the average speed. 240 / 60 = 4 #### 4
A group of friends want to share some candy equally. If they have 48 candies and there are 8 friends, how many candies will each friend get?	The number of candies each friend gets is equal to the total number of candies divided by the number of friends. 48 / 8 = 6 #### 6
Tom has 3 groups of 4 balloons in his bag. How many balloons does Tom have in total?	Tom has 3 groups of 4 balloons. 3 x 4 = 12. So Tom has 12 balloons in total. #### 12
A bookstore is having a sale on books. If a customer buys 3 books, they get a fourth book for 30% off. If the original price of each book is $10, what is the total cost of four books?	The original price of each book is $10. So the price of 3 books is 3 x $10 = $30. The price of the fourth book is $10 - (30% of $10) = $10 - $3 = $7. The total cost is $30 + $7 = $37. #### 37
A group of students want to share some cookies equally. If they have 120 cookies and there are 15 students, how many cookies will each student get?	The number of cookies is 120 and the number of students is 15. To find out how many cookies each student will get, divide 120 by 15. 120 ÷ 15 = 8. Each student will get 8 cookies. #### 8
Michael has 50 stickers. He wants to share them equally among 10 of his friends. How many stickers will each friend get?	The number of stickers is 50 and the number of friends is 10. To find out how many stickers each friend will get, divide 50 by 10. 50 ÷ 10 = 5. Each friend will get 5 stickers. #### 5
A plane travels from city A to city B at an average speed of 80 km/h and returns at an average speed of 60 km/h. What is the average speed of the plane for the entire trip?	Let the distance between city A and city B be d. The time taken to travel from city A to city B is d / 80 hours. The time taken to travel from city B to city A is d / 60 hours. The total time taken is d / 80 + d / 60 = 2d / 120 + 2d / 120 = 4d / 120 hours. The total distance travelled is 2d km. The average speed is total distance / total time = 2d / (4d / 120) = 60 km/h. #### 60
Sarah spent $50 on a new bike helmet and saved the rest of her $80 allowance. How much money does Sarah have left?	The amount of money Sarah has left is the difference between her total allowance and the amount spent on the bike helmet. So, it is 80 - 50 = 30. #### 30
A bakery has 24 cupcakes. If it sells 6 on Monday, 4 on Tuesday, and 8 on Wednesday, how many cupcakes does the bakery have left?	To find out the total number of cupcakes sold, add the number of cupcakes sold on each day. Let's do it: 6 + 4 + 8 = 18. The number of cupcakes left is the difference between the total number of cupcakes and the number of cupcakes sold, so it is 24 - 18 = 6. #### 6
There are 12 students in a class. If 4 are chosen to present a project, in how many ways can the 4 students be selected from the class of 12 students?	The number of ways to choose 4 students from 12 students is the combination 12C4, which can be calculated as 12! / ((12-4)! * 4!). So, let's calculate it: 12! / (8! * 4!) = (12 * 11 * 10 * 9) / (4 * 3 * 2 * 1) = 11 * 10 * 3 * 9 = 11 * 10 * 27 = 2970. #### 495
Tom invested $2,000 in a savings account that earns 2% interest. How much interest does Tom earn after 5 months?	First, find out the interest rate per month. Since the interest rate is 2% per year, the interest rate per month is 2%/12 = 0.00166667. Now, multiply the principal amount by the interest rate per month and the number of months. The interest earned is 2000 * 0.00166667 * 5 = 8.33333. #### 8
What is the probability that out of 4 coin flips, exactly 3 are heads?	The probability of a single coin flip coming up heads is 1/2, and the probability of a single coin flip coming up tails is 1/2. The probability of exactly 3 heads out of 4 coin flips is the probability of 3 heads in a row and one tail, multiplied by the number of ways to arrange them. One such arrangement is HTTH, where H is heads and T is tails. The probability of HTTH is (1/2)^4 = 1/16. Since t…
Sam has 40 marbles in a bag. He adds 8 more marbles to the bag. How many marbles does Sam have now?	Sam initially has 40 marbles. If he adds 8 more, he now has 40 + 8 = 48 marbles. #### 48
A bookstore sells a total of 350 books per week. They sell a combination of fiction and non-fiction books. If they sell 20 more fiction books than non-fiction books, and each fiction book costs $15, how much money did the bookstore make in a week if each non-fiction book costs $10?	First, let's find the number of fiction books and non-fiction books. If they sell 20 more fiction books than non-fiction books and a total of 350 books, then the number of non-fiction books is (350 - 20)/2 = 165 books, and the number of fiction books is 165 + 20 = 185 books. Now, let's find the total money made by the bookstore. The bookstore made 165 x $10 + 185 x $15 = $4,100. #### 4100
A rectangle has a length of 12 cm and a breadth of 5 cm. What is the length of its diagonal?	The length of the diagonal can be found using the Pythagorean theorem. The diagonal is √(length^2 + breadth^2) = √(12^2 + 5^2) = √(169) = 13 cm. #### 13
A bag contains 10 identical blue balls and 5 identical red balls. If a ball is drawn at random, what is the probability that it is a blue ball?	The total number of balls is 10 + 5 = 15. The probability of drawing a blue ball is the number of blue balls divided by the total number of balls = 10/15 = 2/3. #### 2/3
A farmer sells a total of 480 kilograms of apples per day. They sell a combination of green and red apples. If they sell 40 more kilograms of green apples than red apples, and they sell 240 kilograms of green apples, how many kilograms of red apples do they sell?	Let's find the number of green apples and red apples. If they sell 40 more kilograms of green apples than red apples and a total of 480 kilograms, then the number of red apples is 240 - 40 = 200 kilograms. #### 200
A pencil box has 3 compartments, and each compartment can hold 12 pencils. If the pencil box is currently empty, how many pencils can be placed in it in total?	Let's multiply the number of compartments by the number of pencils each compartment can hold: 3 * 12 = 36. So, a total of 36 pencils can be placed in the pencil box. #### 36
Emma is saving money for a new doll and has $85. If she needs $120, how much more money does she need?	Let's subtract the amount Emma already has from the amount she needs: 120 - 85 = 35. So, Emma needs 35 more dollars. #### 35
A bakery is making cookies for a party. They need to package 48 cookies into boxes that hold 6 cookies each. How many boxes will they need?	Let's divide the total number of cookies by the number of cookies each box can hold: 48 / 6 = 8. So, the bakery will need 8 boxes. #### 8
A pair of earrings and a necklace together cost $2.80. The necklace costs $2.20 more than the earrings. How much do the earrings cost?	Let's say the cost of the earrings is x. Then the cost of the necklace is x + 2.20. Since they cost $2.80 together, we can set up the equation x + (x + 2.20) = 2.80. Solving for x, we get x = 0.30. So, the earrings cost $0.30. #### 0.30
A library has 300 books on its shelves, 40% of which are novels. If 25% of the novels are sold, how many books are left on the shelves?	First, let's find the number of novels: 40% of 300 = 0.40 * 300 = 120 novels. Next, let's find the number of novels sold: 25% of 120 = 0.25 * 120 = 30 novels sold. Now, let's subtract the number of novels sold from the total number of books: 300 - 30 = 270 books left. #### 270
A cube has a side length of 8 cm. What is its surface area?	The surface area of a cube is given by 6s^2 where s is the side length. Plugging in s=8 cm, we get 6 * 8^2 = 6 * 64 = 384. ####384
A bookshelf has 8 identical shelves, and 12 identical books are placed on each shelf. How many books are there in total?	There are 8 shelves and 12 books on each shelf. The total number of books is 8 * 12 = 96. ####96
The diameter of a circle is 28 cm. What is its circumference?	The circumference of a circle is given by pi * d where d is the diameter. Plugging in d = 28 cm, we get 3.14 * 28 = 87.92. ####8792
A bakery produces 18 identical loaves of bread and packs 6 loaves in each bag. How many bags does it produce?	The bakery produces 18 loaves and packs 6 loaves in each bag. The number of bags produced is 18 / 6 = 3. ####3
A right circular cylinder has a radius of 5 cm and a height of 10 cm. What is its curved surface area?	The curved surface area of a cylinder is given by 2 * pi * r * h where r is the radius and h is the height. Plugging in r = 5 cm and h = 10 cm, we get 2 * 3.14 * 5 * 10 = 314. ####314
A rectangular prism has a length of 9 meters, width of 4 meters, and height of 6 meters. What is its volume?	To find the volume, multiply the length, width, and height: 9 x 4 x 6 = 216. #### 216
A store is having a sale of 25% off on all shirts. If a shirt is originally priced at 50 dollars, how much will it cost after the sale?	First, find 25% of 50: 50 x 0.25 = 12.50. Then, subtract this from the original price: 50 - 12.50 = 37.50. #### 37.50
Five people are sitting at a circular table. How many different ways can they arrange themselves?	The number of ways to arrange people around a circular table is (n-1)!, where n is the number of people. So, the number of ways is (5-1)! = 4! = 4 x 3 x 2 x 1 = 24. #### 24
If a bicycle travels 25 miles in 5 hours, how many miles will it travel in 3 hours?	First, find the rate: 25 miles / 5 hours = 5 miles per hour. Then, multiply this by 3 hours to get the total distance: 5 miles/hour x 3 hours = 15 miles. #### 15
A cube has a surface area of 150 square meters. What is the length of one side?	The surface area of a cube is 6L², where L is the length of one side. So, 150 = 6L². Divide both sides by 6: 150 / 6 = L². Then, take the square root of both sides: L = √(150/6) = √25 = 5. #### 5
In a sports event, there are 15 teams participating in a tournament. Each team plays with every other team exactly once. How many matches are there in total?	If each team plays with every other team, it means there are 15 teams choosing 2 teams at a time. That is, the number of matches = 15C2 = (15 × 14)/2 = 105. #### 105
Sarah has 12 bunches of bananas in her shop, and each bunch has 9 bananas. How many bananas does Sarah have in her shop?	The total number of bananas = number of bunches × number of bananas per bunch = 12 × 9 = 108. #### 108
If it takes 5 hours to travel from City X to City Y at an average speed of 75 km per hour, how many kilometers is City X from City Y?	Since the average speed = total distance ÷ time taken, we can find the total distance = average speed × time taken = 75 km/h × 5 h = 375 km. #### 375
A rectangular garden has a length of 15 meters and a width of 8 meters. What is the perimeter of the garden?	The perimeter of a rectangle = 2 × (length + width) = 2 × (15 + 8) = 2 × 23 = 46 meters. #### 46
Alex has 120 cookies in a jar, and he wants to share them equally among 8 of his friends. How many cookies will each friend get?	The number of cookies each friend will get = total number of cookies ÷ number of friends = 120 ÷ 8 = 15. #### 15
A box contains 5 white balls, 3 black balls, and 2 red balls. What is the number of ways to select 3 balls from the box if the balls are indistinguishable?	First, we need to find the number of combinations. The formula is nCr = n! / (r! * (n - r)!). In this case, n = 10 and r = 3. Plugging in the values, we get 10! / (3! * (10 - 3)!). Simplifying, we get 10! / (3! * 7!). Solving, we get 120. #### 120
In a certain company, 25% of the employees are engineers. If there are 80 employees in total, how many engineers are there in the company?	Let's find 25% of 80. We know that 25% is the same as 1/4. So, we need to find 1/4 of 80. Dividing 80 by 4, we get 20. #### 20
A bookshelf is 16 feet long, It is divided into 3 sections in a ratio of 2:3:4, what is the length of the longest section?	First, we need to add the parts of the ratio. 2 + 3 + 4 = 9. Now, we need to divide the total length of the bookshelf by 9. 16 / 9 = 1.78. Now, we need to multiply 1.78 by 4 (since the longest section corresponds to 4). 1.78 * 4 = 7.12. #### 7
A plane travels from city A to city B at an average speed of 300 miles per hour. On its return journey, the average speed is 200 miles per hour. What is the average speed of the plane for the entire trip?	First, we need to find the total distance traveled. Since the plane travels to and fro, the total distance is the same as the distance from city A to city B. Let's call it x. The total time taken is the sum of the time taken for the to and fro journey. Time = distance / speed. The time taken for the to journey is x / 300. The time taken for the fro journey is x / 200. The total time is (x / 300) …
A fruit vendor sells 120 apples at $1.50 each and 80 bananas at $0.50 each. How much money did the fruit vendor make in total?	First, we need to find the total money made from apples. 120 apples at $1.50 each is 120 * 1.50 = 180. Next, we need to find the total money made from bananas. 80 bananas at $0.50 each is 80 * 0.50 = 40. Finally, we add the money made from apples and bananas. 180 + 40 = 220. #### 220
A rectangular prism has a length of 8 cm and a width of 5 cm. If the volume is 240 cm^3, what is the height?	First, find the area of the base by multiplying the length and width. 8 * 5 = 40. Then, divide the volume by the area to find the height. 240 / 40 = 6. #### 6
A car travels from city A to city B at 80 km/h and returns at 60 km/h. What is the average speed for the round trip?	First, find the time taken to travel from A to B. Let's assume it takes x hours. Then, the distance is 80x. When returning, the distance is the same, so it's 80x. The speed is 60 km/h, so the time taken is 80x / 60. Now, the total distance is 2 * 80x = 160x. The total time is x + 80x / 60. Average speed is total distance / total time. Average speed = 160x / (x + 80x / 60). Simplify to get average…
In a right triangle, the length of one of the legs is 5 cm and the length of the hypotenuse is 13 cm. What is the length of the other leg?	Use the Pythagorean theorem. Let the length of the other leg be x. Then, x^2 + 5^2 = 13^2. Simplify to x^2 + 25 = 169. Subtract 25 from both sides to get x^2 = 144. Take the square root to find x. x = sqrt(144) = 12. #### 12
A bakery sells a total of 250 loaves of bread on Monday and Tuesday. On Monday, they sold 30 more loaves than on Tuesday. How many loaves of bread did they sell on Tuesday?	Let the number of loaves sold on Tuesday be x. Then, the number of loaves sold on Monday is x + 30. The total number of loaves is 250, so x + (x + 30) = 250. Simplify to 2x + 30 = 250. Subtract 30 from both sides to get 2x = 220. Divide by 2 to find x. x = 220 / 2 = 110. #### 110
A triangle has angles of 40 degrees and x degrees. What is the value of x?	The sum of angles in a triangle is 180 degrees. So, 40 + x + third angle = 180. We don't know the third angle, but we can write it as 180 - 40 - x. This is equal to 140 - x. Since it's a triangle, all angles are equal to or greater than 0. So, 140 - x >= 0. Simplify to get x <= 140. Since x is an angle, x > 0. Combine the two inequalities to get 0 < x <= 140. The only possible value of x in this …
A bookstore sells 180 books at $10 each and 70 notebooks at $5 each. How much money did the bookstore make in total?	First, find the total amount of money made by selling books. 180 books at $10 each is 180 x $10 = $1800. Then, find the total amount of money made by selling notebooks. 70 notebooks at $5 each is 70 x $5 = $350. Finally, add the total amount of money made by selling books and notebooks. $1800 + $350 = $2150. #### 2150
A company has 500 employees. Of these, 300 employees are engineers and the rest are non-engineers. If the number of non-engineers doubles every year, how many non-engineers are there after 2 years?	The company has 500 employees. 300 are engineers, so the remaining 500 - 300 = 200 are non-engineers. The number of non-engineers doubles every year. After 1 year, there are 200 x 2 = 400 non-engineers. After 2 years, there are 400 x 2 = 800 non-engineers. #### 800
A dozen friends want to share 72 cookies equally. How many cookies will each friend get?	There are 72 cookies. If there are 12 friends, each friend will get 72 / 12 = 6 cookies. #### 6
What is the equation of the circle that has its center at the point (5, -2) with a radius of 4 units?	The equation of a circle with center (a, b) and radius r is (x - a)^2 + (y - b)^2 = r^2. In this case, the center is (5, -2) and the radius is 4. So the equation of the circle is (x - 5)^2 + (y + 2)^2 = 4^2. (x - 5)^2 + (y + 2)^2 = 16. #### 16
What is the value of x if 4x - 2 = 12?	To solve for x, add 2 to both sides. 4x - 2 + 2 = 12 + 2. 4x = 14. Divide both sides by 4. 4x / 4 = 14 / 4. x = 14 / 4. x = 3.5. #### 3.5
A sequence of numbers is defined recursively as b(n) = 3b(n-1) + 2, where b(1) = 3. What is b(4)?	To find b(4), we need to find b(2) and b(3) first. b(2) = 3b(1) + 2 = 3(3) + 2 = 11. b(3) = 3b(2) + 2 = 3(11) + 2 = 35. Finally, b(4) = 3b(3) + 2 = 3(35) + 2 = 107. #### 107
In the coordinate plane, the line through (2,5) and (8,-2) is perpendicular to the line through the points (3,c) and (6,1). What is the value of c?	The slope of the line through (2,5) and (8,-2) is (-2 - 5) / (8 - 2) = -7 / 6. So, the slope of the perpendicular line is 6 / 7. Then, (-2 - 5) / (8 - 2) = (1 - c) / (6 - 3) => -7 / 6 = (1 - c) / 3 => -7 / 2 = 1 - c => c = 9 / 2. #### 9/2
A person's salary increases at a rate of 5% per year. If the salary is currently $40,000, how many years will it take for the salary to increase to $50,000?	First, find the annual increase. It is 5% of $40,000, which is 0.05 * 40000 = $2000. To reach $50,000, the salary must increase by $10,000, which at $2000 per year, will take $10,000 / $2000 = 5 years. #### 5
A pool can hold 2000 gallons of water. If 400 gallons of water are already in the pool, how much more water can be added?	The maximum capacity of the pool is 2000 gallons, and 400 gallons are already in the pool. Therefore, the amount of water that can still be added is 2000 - 400 = 1600 gallons. #### 1600
A cargo plane travels from City X to City Y at an average speed of 200 km/h and returns at an average speed of 250 km/h. What is the average speed of the plane for the round trip?	First, find the total distance traveled by the plane. The distance from City X to City Y is the same as the distance from City Y to City X. Let it be d km. Then, the total distance traveled is 2d km. The total time taken is the sum of the times taken for the two trips. The time taken for the trip from City X to City Y is d / 200 h. The time taken for the trip from City Y to City X is d / 250 h. T…
In a market research, 60% of the customers surveyed said that they prefer brand A over brand B. 15% of those who prefer brand A also said that they would recommend it to friends. If 150 customers were surveyed, how many customers would likely recommend brand A to friends?	60% of 150 is 0.6 x 150 = 90 customers who prefer brand A. 15% of 90 is 0.15 x 90 = 13.5. So 13 customers would likely recommend brand A to friends. #### 13
Tiago has a rectangular garden with a length of 12 meters and a width of 5 meters. If he wants to put a fence around the entire garden, what is the perimeter of the fence?	The perimeter of a rectangle is 2(l + w) = 2(12 + 5) = 2 x 17 = 34 meters. #### 34
Emma needs 1/3 cup of sugar to make a recipe. If Emma needs to make 5 recipes, how much sugar will she need in total?	1/3 cup x 5 = 5/3 cup = 1 2/3 cups. So Emma will need 1 2/3 cups of sugar. #### 5/3
A car's speed decreases according to the equation s(t) = 60 - 10t, where s is the speed at time t in seconds. What is the speed after 2 seconds?	s(t) = 60 - 10(2) = 60 - 20 = 40. So the speed after 2 seconds is 40. #### 40
What is the mode of the dataset 3, 5, 7, 7, 9, 11?	The mode is the most frequent number in the dataset. The most frequent number in this dataset is 7. #### 7
In a survey of 50 people, 30 said they like milkshakes. What is the percentage of people who like milkshakes?	To find the percentage, divide the number of people who like milkshakes by the total number of people, and then multiply by 100%. (30 / 50) * 100 = 0.6 * 100 = 60%. #### 60
A rectangular garden has a length of 25 meters and a width of 12 meters. What is the perimeter of the garden?	The formula for the perimeter of a rectangle is P = 2(l + w). Plug in the values given. P = 2(25 + 12). P = 2(37). P = 74. #### 74
A car travels from City A to City B at an average speed of 50 kilometers per hour. If the distance between the two cities is 150 kilometers, how many hours does it take to travel from City A to City B?	The equation to solve is distance = speed * time. Plug in the values given. 150 = 50 * time. Divide both sides by 50. 150/50 = time. 3 = time. #### 3
A company produces 500 units of a product per day. If they operate 7 days a week, how many units do they produce in a week?	Multiply the number of units produced per day by the number of days. 500 * 7 = 3500. #### 3500
A cylindrical tank has a radius of 4 meters and a height of 10 meters. What is the volume of water it can hold?	The formula for the volume of a cylinder is V = πr²h. Plug in the values given. V = π(4)²(10). V = π(16)(10). V = 160π. Approximate π as 3.14. V ≈ 160 * 3.14. V ≈ 502.4. #### 502
A boutique sells 150 dresses at $25 each and 200 scarves at $5 each. How much money did the boutique make in total?	The boutique made 150 * 25 = 3750 from selling dresses and 200 * 5 = 1000 from selling scarves. So, the total amount of money made by the boutique is 3750 + 1000 = 4750. #### 4750
A swimming pool is 20 meters long and 15 meters wide. If a deck that is 2 meters wide is built around the pool, what is the area of the deck?	First, we find the area of the pool. It is 20 * 15 = 300 square meters. Then, we find the area of the pool and the deck. It is (20 + 2*2) * (15 + 2*2) = 24 * 19 = 456 square meters. So, the area of the deck is 456 - 300 = 156 square meters. #### 156
A furniture store has a sale of 25% off on all furniture. If a chair originally costs $120, how much will it cost during the sale?	The discount on the chair is 120 * 25/100 = 30. So, the price of the chair during the sale is 120 - 30 = 90. #### 90
A pentagon has angles of 70, 80, 90, 120, and x degrees. What is the value of x?	The sum of the angles of a pentagon is 540 degrees. So, 70 + 80 + 90 + 120 + x = 540. Solving for x, we get 540 - 360 = 180. Therefore, x is 180 degrees. #### 180
A restaurant sells a total of 200 burgers and salads on a certain day. The number of burgers sold is 40 more than the number of salads sold. How many salads were sold on that day?	Let x be the number of salads sold. Then, the number of burgers sold is x + 40. Since the total number of burgers and salads sold is 200, we have x + (x + 40) = 200. Solving for x, we get x = 80. Therefore, 80 salads were sold on that day. #### 80
If a bicycle wheel has 16 spokes and 8 of them are broken, what is the probability that a randomly selected spoke is broken?	The probability of a randomly selected spoke being broken is the number of broken spokes divided by the total number of spokes. 8 / 16 = 1/2 = 0.5 #### 0.5
A bakery sells 120 loaves of bread per day. If they pack 8 loaves of bread per bag, how many bags of bread do they sell per day?	The bakery sells 120 loaves of bread per day. To find the number of bags, divide the number of loaves by the number of loaves per bag. 120 / 8 = 15 #### 15
A box contains 12 identical-looking chocolates: 4 dark, 4 milk, and 4 white. What is the probability that a randomly selected chocolate is dark?	The probability of a randomly selected chocolate being dark is the number of dark chocolates divided by the total number of chocolates. 4 / 12 = 1/3 = 0.33 #### 0.33
What is the average of 18, 20, 22, and 25?	To find the average, add the numbers and divide by the count. (18 + 20 + 22 + 25) / 4 = 85 / 4 = 21.25 #### 21.25
A bus travels from city A to city B at an average speed of 30 km/h and returns at an average speed of 50 km/h. What is the average speed of the bus for the entire trip?	Let the distance from city A to city B be x. Then, the total distance travelled = 2x. The total time taken = (x / 30) + (x / 50). To find the average speed, divide the total distance by the total time. (2x) / ((x / 30) + (x / 50)) = 37.5 #### 37.5
What is the value of y if 5y - 2 = 13?	To solve for y, add 2 to both sides: 5y - 2 + 2 = 13 + 2, which gives 5y = 15. Next, divide both sides by 5: 5y / 5 = 15 / 5, giving y = 3. #### 3
A game is played with a spinner that has 8 sections, with 2 red sections, 3 blue sections, and 3 green sections. What is the probability of landing on a blue section?	The total number of outcomes is 8. The number of successful outcomes is 3, since there are 3 blue sections. The probability is the number of successful outcomes divided by the total number of outcomes, which is 3 / 8. #### 0.375
A right triangle has a hypotenuse of length 12 inches and one leg of length 9 inches. What is the length of the other leg?	Using the Pythagorean theorem, we get a^2 + 9^2 = 12^2. Solving for a, we get a^2 = 12^2 - 9^2 = 144 - 81 = 63. Taking the square root of both sides, we get a = sqrt(63) = 7.937. Rounded to two decimal places, a = 7.94. #### 7.94
A die is rolled 8 times. What is the probability that it lands on an even number exactly 4 times?	The probability of landing on an even number on a single roll is 1/2. The probability of landing on an even number exactly 4 times in 8 rolls is (1/2)^4 \* (1/2)^4 \* (8 choose 4) = 1/16 \* 1/16 \* 70 = 35/256. #### 0.137
A bag contains 20 balls, of which 5 are red, 8 are blue, and the rest are green. What is the probability of picking a green ball?	The number of green balls is 20 - 5 - 8 = 7. The probability of picking a green ball is the number of green balls divided by the total number of balls, which is 7 / 20. #### 0.35
The length of an arc of a circle is 8π inches and the radius of the circle is 8 inches. What is the measure of the central angle?	The length of an arc of a circle is given by the formula, l = r × θ. We are given that l = 8π and r = 8. Plug these values in the formula to find θ. θ = l / r = 8π / 8 = π radians. θ = π radians × 180 / π = 180 degrees. #### 180
What is the value of x if 3x + 2 = 14?	To solve for x, subtract 2 from both sides of the equation, 3x = 14 - 2 = 12. Then, divide both sides by 3, x = 12 / 3 = 4. #### 4
Ethan has 12 boxes of pens in his office. Each box contains 16 packs of pens. How many packs of pens does Ethan have in total?	Ethan has 12 boxes of pens, and each box contains 16 packs of pens. Multiply the number of boxes by the number of packs per box to find the total number of packs of pens. Total packs of pens = 12 × 16 = 192 packs. #### 192
In a right triangle, if the length of the hypotenuse is 6cm and one of the legs is 4cm, what is the length of the other leg?	Use the Pythagorean theorem, a^2 + b^2 = c^2, where a and b are the lengths of the legs, and c is the length of the hypotenuse. Let the length of the other leg be x. x^2 + 4^2 = 6^2. x^2 + 16 = 36. x^2 = 20. x = √20 = 2√5 cm. #### 2√5
A bakery claims that 90% of the surveyed customers say that they love the bakery’s new cake flavor. What is the probability that a randomly selected customer in the survey also loves the bakery’s new cake flavor?	The probability that a randomly selected customer in the survey loves the bakery’s new cake flavor is given by the percentage of customers who said they love the flavor. Probability = 90%. #### 0.9
A rectangular prism has a surface area of 240 square meters. What is the length of one side of the prism if the width and height are 4 and 5 meters, respectively?	If the surface area of a rectangular prism is 240 square meters, and the width and height are 4 and 5 meters, respectively, then the length can be calculated using the formula for the surface area of a rectangular prism: 2lw + 2lh + 2wh = S, where S is the surface area, l is the length, w is the width, and h is the height. Substituting the given values, we get: 2l(4) + 2l(5) + 2(4)(5) = 240. Simp…
A bookshelf has 12 shelves, and each shelf can hold 8 books. If the bookshelf is currently empty, how many books can be placed on it in total?	If the bookshelf has 12 shelves, and each shelf can hold 8 books, then the total number of books that can be placed on it is 12 x 8 = 96. Therefore, 96 books can be placed on it in total. #### 96
A farmer has 20 baskets of apples. Each basket has 12 apples. If the farmer wants to divide the apples equally among 4 of his workers, how many apples will each worker get?	If the farmer has 20 baskets of apples, and each basket has 12 apples, then the total number of apples is 20 x 12 = 240. If he wants to divide the apples equally among 4 workers, then each worker will get 240 / 4 = 60 apples. Therefore, each worker will get 60 apples. #### 60
In a group of 20 people, 12 people can play the guitar and 8 people can play the violin. If 3 people can play both instruments, how many people can play at least one of the two instruments?	If 12 people can play the guitar and 8 people can play the violin, then the total number of people who can play at least one instrument is 12 + 8 = 20. However, 3 people can play both instruments, so we need to subtract 3 from 20 to get the total number of people who can play at least one instrument: 20 - 3 = 17. Therefore, 17 people can play at least one of the two instruments. #### 17
A store sells 30 bicycles at $120 each. What is the total amount of money the store earns?	If the store sells 30 bicycles at $120 each, then the total amount of money the store earns is 30 x 120 = 3600. Therefore, the total amount of money the store earns is $3600. #### 3600
A farm has a total of 180 animals, consisting of cows, pigs, and chickens. If the farm has 20 more cows than pigs, and 40 chickens, how many pigs does the farm have?	Let's say the number of cows is c and the number of pigs is p. We know c = p + 20. The total number of animals is 180, so c + p + 40 = 180. Substitute c with p + 20, and we get p + 20 + p + 40 = 180. 2p + 60 = 180. Subtract 60 from both sides, and we get 2p = 120. Divide both sides by 2, and we get p = 60. #### 60
A cable is 25 meters long. It is cut into pieces of 5 meters each. How many pieces of cable can be cut?	Divide the total length of the cable by the length of each piece. 25 ÷ 5 = 5. #### 5
A ladder casts a shadow of 12 meters. If a 3-meter tall pole casts a shadow of 4 meters, what is the height of the ladder?	Set up a proportion to relate the shadow length to the object height. 4/12 = 3/x. Cross-multiply to get 4x = 36. Divide both sides by 4, and we get x = 9. #### 9
A library has 4 shelves, and each shelf has 8 books. If 3 more shelves are added, and 20 more books are added, how many books will the library have in total?	First, calculate the total number of books on the original shelves. 4 * 8 = 32. Then, add the number of new shelves and new books. 32 + 3 * 8 + 20 = 68. #### 68
A clothing store has 150 shirts, 100 pants, and 50 dresses on its racks. If 25% of the shirts, 10% of the pants, and 5% of the dresses are sold, how many items of clothing are left on the racks?	Calculate the number of shirts sold: 0.25 * 150 = 37.5. Calculate the number of pants sold: 0.1 * 100 = 10. Calculate the number of dresses sold: 0.05 * 50 = 2.5. Total number of items sold: 37.5 + 10 + 2.5 = 50. Subtract from the total number of items: 150 + 100 + 50 - 50 = 250. #### 250
A rectangle has a length of 10 cm and a width of 5 cm. What is the area of the rectangle?	The area of a rectangle is calculated by multiplying its length and width. The formula is A = l × w. In this case, A = 10 × 5 = 50 square centimeters. #### 50
Benny can paint a room in 8 hours. If he has 5 more rooms to paint, how many hours will it take him in total?	If Benny can paint a room in 8 hours, he can paint 5 rooms in 5 × 8 hours. 5 × 8 = 40. #### 40
Caroline has 12 more pencils than her 18 notebooks. If Caroline loses 4 notebooks, what is the difference between the number of pencils and notebooks Caroline has now?	Caroline has 18 notebooks and 12 more pencils than that, so she has 18 + 12 = 30 pencils. If she loses 4 notebooks, she has 18 - 4 = 14 notebooks. The difference between the pencils and notebooks is 30 - 14 = 16. #### 16
Andrew wants to buy a book that costs $24. If he has a coupon for$4 off, how much will he pay for the book?	If Andrew has a coupon for $4 off, he will pay 24 - 4 dollars for the book. 24 - 4 = 20. #### 20
A car travels 125 miles in 5 hours. How many miles will it travel in 8 hours?	The car travels 125 miles in 5 hours, so it travels 125 / 5 miles in 1 hour. In 8 hours, it will travel (125 / 5) × 8 miles. (125 / 5) × 8 = 200. #### 200
A bookstore sells 150 books per week. Each book costs $25. How much money does the bookstore make in a week?	The bookstore makes 150 * 25 = 3750 dollars per week. #### 3750
Alex is planning a bike ride from City C to City D. If the distance between City C and City D is 240 kilometers and he rides at a constant speed of 24 kilometers per hour, how many hours will he take to cover the distance?	Alex will take 240 / 24 = 10 hours to cover the distance. #### 10
In a certain game, you toss a die 3 times. What is the probability that you get exactly 2 sixes?	The total number of possible outcomes is 6 * 6 * 6 = 216. There are 15 ways to get exactly 2 sixes. The probability is 15 / 216. #### 15/216
A bag contains 18 black balls, 12 white balls, and 6 orange balls. What is the probability of drawing a black ball?	The total number of balls is 18 + 12 + 6 = 36. The probability of drawing a black ball is 18 / 36 = 1 / 2. #### 1/2
A circular swimming pool has a radius of 8 meters. If a path that is 2 meters wide is built around the pool, what is the area of the path?	The area of the pool is π * 8^2 = 64π square meters. The area of the outer circle is π * 12^2 = 144π square meters. The area of the path is 144π - 64π = 80π square meters. #### 80π
The area of a trapezoid is 48 square inches. If the height of the trapezoid is 8 inches, what is the length of the median?	Let the length of the median be x. The area of the trapezoid is the product of the median and height divided by 2, which is 48 = (x*8)/2. Solving for x, we get x = 12. #### 12
Alexia is a freelance writer, and she is paid $40 per hour. If she works for 7 hours on Monday, 4 hours on Wednesday, and 6 hours on Friday, how much will Alexia earn at the end of the week?	Alexia earns 40*7 = 280 on Monday, 40*4 = 160 on Wednesday, and 40*6 = 240 on Friday. The total earnings are 280 + 160 + 240 = 680. #### 680
A library has a total of 400 books. They have a combination of fiction and non-fiction books. If they have 80 more fiction books than non-fiction books, and they have 220 fiction books, how many non-fiction books do they have?	Let the number of non-fiction books be x. The number of fiction books is 80 more than non-fiction books, so the number of fiction books is x+80. The total number of books is 400, so x + x + 80 = 400. Solving for x, we get x = 160. #### 160
A farmer has 30 kilograms of fertilizer. He packs it into bags of 2 kilograms each. How many bags of fertilizer does the farmer have now?	The number of bags is the total weight in kilograms divided by the weight per bag, which is 30/2 = 15. #### 15
Daniel used 24 liters of paint to paint 4 rooms. How many liters of paint did Daniel use to paint each room?	The amount of paint used per room is the total amount of paint used divided by the number of rooms, which is 24/4 = 6. #### 6
There are 15 students in a class, and everyone shakes hands with each other exactly twice. How many handshakes are there in total?	The number of handshakes is equal to the number of students multiplied by the number of students minus one, divided by two, and then multiplied by two because each student shakes hands twice. It is (15 * 14 / 2) * 2 = (15 * 14) = 210. #### 210
The average of 7 numbers is 15. If 4 of the numbers are 10, 12, 18, and 20, what is the average of the remaining three numbers?	The sum of the 7 numbers is 7 * 15 = 105. The sum of the 4 given numbers is 10 + 12 + 18 + 20 = 60. The sum of the remaining 3 numbers is 105 - 60 = 45. The average is 45 / 3 = 15. #### 15
The length of a rectangular swimming pool is 20 meters and its width is 12 meters. If a deck that is 3 meters wide is built around the pool, what is the area of the deck?	The area of the deck is equal to the area of the larger rectangle minus the area of the smaller rectangle. The area of the larger rectangle is (20 + 2 * 3) * (12 + 2 * 3) = 26 * 18 = 468. The area of the smaller rectangle is 20 * 12 = 240. The area of the deck is 468 - 240 = 228. #### 228
David has been saving money for a new laptop and has $540. He wants to buy a laptop that costs $630. How much more money does David need to save?	David needs to save $630 - $540 = $90. #### 90
In a right triangle, the length of the hypotenuse is 7 and one of the legs is 4. What is the length of the other leg?	Use the Pythagorean theorem: a^2 + b^2 = c^2, where a and b are the legs and c is the hypotenuse. 4^2 + b^2 = 7^2. 16 + b^2 = 49. b^2 = 33. b = √33 = 5.73 (approximately). #### 5.73
A coffee machine can make 30 cups of coffee in 3 hours. How many cups of coffee can it make in 5 hours?	Let's assume the coffee machine makes x cups of coffee in 5 hours. Since it makes 30 cups in 3 hours, it makes 30/3 = 10 cups per hour. Therefore, in 5 hours, it will make 10 * 5 = 50 cups of coffee. #### 50
A pencil is 15 cm long. If it is divided into 3 parts, what is the length of each part?	Let's call the length of each part x. Since the pencil is divided into 3 parts, x + x + x = 15, which means 3x = 15. Therefore, x = 15/3 = 5 cm. #### 5
A basketball team scored an average of 80 points in 4 games. How many points did they score in total?	Let's call the total points scored x. Since they scored an average of 80 points in 4 games, x/4 = 80, which means x = 80 * 4 = 320 points. #### 320
A car travels 120 km in 2 hours. How many km does it travel per hour?	Let's call the km traveled per hour x. Since the car travels 120 km in 2 hours, x * 2 = 120, which means x = 120/2 = 60 km/h. #### 60
A bookshelf has 5 shelves, and each shelf can hold 8 books. If the bookshelf is currently empty, how many books can be placed on it in total?	Since there are 5 shelves, and each shelf can hold 8 books, the total number of books that can be placed is 5 * 8 = 40 books. #### 40
A cyclist is traveling from town X to town Y. The distance between the towns is 315 km. If the cyclist travels at a speed of 35 km/h, how long will it take to reach town Y?	First, let's identify the distance (d) and speed (s) of the cyclist: d = 315 km, s = 35 km/h. To find the time (t) it takes to reach town Y, we use the formula t = d / s. Plugging in the values, we get t = 315 / 35. t = 9. #### 9
A bookshelf has 5 shelves, and each shelf can hold 8 books. If the bookshelf is currently empty, how many books can be placed on it in total?	Since there are 5 shelves, and each shelf can hold 8 books, we multiply the two numbers together to find the total number of books that can be placed on the bookshelf. Total number of books = 5 x 8 = 40. #### 40
A factory produces a total of 480 units of a product per day. They produce a combination of product A and product B. If the ratio of product A to product B is 2:3, how many units of product A are produced per day?	First, let's identify the ratio of product A to product B: 2:3. We can write this as a fraction, A / (A + B) = 2 / 5. We know that A + B = 480. We can set up an equation: A / (A + 480 - A) = 2 / 5. Solving for A, we get A = 192. #### 192
In a group of 75 students, 45 speak Spanish, 30 speak French, and 20 speak both languages. What is the probability that a student speaks at least one language?	First, let's find the total number of students who speak at least one language. This is the number of students who speak Spanish or French or both. Using the inclusion-exclusion principle, we get: Total number of students who speak at least one language = 45 + 30 - 20 = 55. The probability that a student speaks at least one language is then the number of students who speak at least one language d…
A small company has 40 employees. If 1/4 of the employees are managers, how many managers work in the company?	To find the number of managers, we multiply the total number of employees by the fraction of employees who are managers. Number of managers = 40 x 1/4 = 10. #### 10
The mean of a dataset is 10 and the standard deviation is 2. What is the z-score of 8 in this dataset?	First, calculate the z-score using the formula (x - μ) / σ, where x is 8, μ is 10, and σ is 2. Then, substitute the values, (8 - 10) / 2 = -1. #### -1
A car travels from city A to city B at an average speed of 60 km/h and returns at an average speed of 40 km/h. What is the average speed of the car for the entire trip?	First, calculate the time taken for the trip from city A to city B. Let's assume the distance is x km. Then, time = distance / speed = x / 60. For the return trip, time = x / 40. Now, find the total time taken = x / 60 + x / 40 = 5x / 120. The total distance is 2x km. Average speed = total distance / total time = 2x / (5x / 120) = 48. #### 48
A factory produces 480 units of a product per day. They operate for 8 hours a day. How many units are produced per hour?	Total units produced per day = 480. Total hours operated per day = 8. Units produced per hour = Total units produced per day / Total hours operated per day = 480 / 8 = 60. #### 60
A cylindrical tank of radius 2 cm and height 10 cm is filled with water at a rate of 0.5 cm^3/s. How many seconds will it take to fill the tank?	First, find the volume of the cylindrical tank using the formula πr^2h, where r is 2 cm and h is 10 cm. Volume = π(2)^2(10) = 40π. Now, find the time taken to fill the tank = Volume / Rate of filling = 40π / 0.5 = 80π. #### 80π (approximately 251.32)
What is the value of x if x^2 + 3x - 10 = 0?	Factorize the equation x^2 + 3x - 10 = (x + 5)(x - 2) = 0. This gives x + 5 = 0 or x - 2 = 0. Solving for x, we get x = -5 or x = 2. #### -5, 2
A bakery sells a total of 480 pastries per day. It sells 120 more cakes than pies. If the number of pies sold is x, what is the total number of cakes sold?	Let's first write an expression for the number of cakes in terms of x. Number of cakes is x + 120. So the total number of pastries is x + (x + 120) = 480. Simplify by combining like terms. 2x + 120 = 480. Subtract 120 from both sides to get 2x = 360. Divide both sides by 2 to get x = 180. So the number of cakes is 180 + 120 = 300. #### 300
A company produces 150 units of a product per hour. How many units will it produce in 7.5 hours?	Multiply the number of hours by the rate of production. So 7.5 * 150 = 1125. #### 1125
A snooker player scored an average of 75 points in 5 games. How many points did the player score in total?	Multiply the number of games by the average score. So 5 * 75 = 375. #### 375
A rectangular prism has a length of 8 cm, a width of 6 cm, and a height of 4 cm. What is its volume?	Multiply the length, width, and height to get the volume. So 8 * 6 * 4 = 192. #### 192
A bicycle travels from City A to City B at an average speed of 25 km per hour. On its way back, it travels at an average speed of 20 km per hour. What is the average speed of the bicycle for the entire trip?	Let's assume the distance between City A and City B is x. So the total distance is 2x. Time = distance / speed. So the time taken to travel from City A to City B is x / 25. The time taken to travel back is x / 20. The total time taken is (x / 25) + (x / 20) = 2x / (25 * 20). The average speed is the total distance divided by the total time. So the average speed is 2x / ((2x) / (25 * 20)) = 22.5. …
Ben has 7 groups of 4 pens in his desk drawer. How many pens does Ben have in total?	7 groups of 4 pens means Ben has 7 x 4 = 28 pens. #### 28
John writes 8 sentences per minute on average. If he writes for 12 minutes, how many sentences does John write?	If John writes 8 sentences per minute for 12 minutes, he writes 8 x 12 = 96 sentences. #### 96
Olivia has a pet dog that currently weighs 18 kg. If the dog gains 2 kg each year, how much will it weigh after 4 years?	If the dog gains 2 kg each year for 4 years, the total weight gained is 2 x 4 = 8 kg. The dog will weigh 18 + 8 = 26 kg after 4 years. #### 26
Find the simple interest on $450 invested at a rate of 9% per annum for 6 years?	Simple interest is calculated as principal * rate * time. Principal is$450, rate is 9%/100 = 0.09, and time is 6 years. So, simple interest is 450 * 0.09 * 6 = 243. #### 243
Tom wants to share 24 cookies equally among 4 of his friends. How many cookies will each friend get?	If Tom has 24 cookies and wants to share them equally among 4 friends, each friend will get 24 / 4 = 6 cookies. #### 6
Emily has a rectangular garden with an area of 48 square meters. If the length is 6 meters, what is the width?	The formula for area of a rectangle is length * width. Given area is 48, length is 6, we need to find width. 48 = 6 * width. Dividing both sides by 6 gives width = 48 / 6 = 8. #### 8
A bookshelf has 12 shelves, and each shelf can hold 8 books. How many books can the bookshelf hold in total?	To find the total number of books that the bookshelf can hold, we multiply the number of shelves by the number of books each shelf can hold: 12 x 8 = 96. Therefore, the bookshelf can hold 96 books in total. #### 96
A rectangular garden measures 15 meters by 8 meters. What is the area of the garden?	To find the area of the garden, we multiply the length by the width: 15 x 8 = 120. Therefore, the area of the garden is #### 120
A group of friends want to share some money equally. If they have $360 and there are 8 friends, how much will each friend get?	To find out how much each friend will get, we divide the total amount of money by the number of friends: 360 ÷ 8 = 45. Therefore, each friend will get #### 45
A cube has a surface area of 150 square centimeters. What is the length of one side of the cube?	Since the surface area of a cube is 6 times the square of the length of one side, we can set up the equation: 6x^2 = 150. Solving for x, we get x = √(150/6) = √25 = 5. Therefore, the length of one side of the cube is #### 5
A person invested $2000 in a savings account that earns 5% interest per year. How much will the person have in the account after 1 year?	To find out how much the person will have in the account after 1 year, we add the interest to the initial investment: 2000 + (2000 x 5%) = 2000 + 100 = 2100. Therefore, the person will have #### 2100
A bakery is selling 120 loaves of bread per day. If they make 420 loaves of bread per week, how many days a week are they open?	The bakery makes 420 loaves of bread per week. Since they sell 120 loaves per day, you can divide 420 by 120 to find the number of days. 420 / 120 = 3.5. Since the bakery cannot be open half a day, they are open 3 days per week or every other day. #### 3
A person purchases a shirt for 25 dollars and a hat for 15 dollars. If he pays 2 dollars less than twice the amount he spent, how much change will he get?	The person spends 25 + 15 = 40 dollars. Twice the amount is 2 * 40 = 80 dollars. He pays 80 - 2 = 78 dollars. He gets 78 - 40 = 38 dollars change. #### 38
A bag contains 50 marbles, and 20 of them are green. If 15 more marbles are added to the bag, how many percent of the total marbles are green?	Initially, there are 50 marbles with 20 green marbles. When 15 more marbles are added, there are 50 + 15 = 65 marbles. The percentage of green marbles is (20 / 65) * 100 = 30.77%. #### 31
In a group of 18 people, 8 people can speak French, and 10 people can speak Spanish. If 2 people can speak both languages, how many people can speak at least one language?	There are 8 people who speak French, and 10 who speak Spanish. However, 2 people are counted twice. To find the total number of people speaking at least one language, add the French speakers and the Spanish speakers and subtract the overlap: 8 + 10 - 2 = 16. #### 16
A rectangular picture frame has a length of 8 inches and a width of 6 inches. If a 2-inch border is added to the frame, what is the area of the border?	The area of the frame is length * width = 8 * 6 = 48 square inches. The length of the frame with the border is 8 + 2 + 2 = 12 inches, and the width is 6 + 2 + 2 = 10 inches. The area of the frame with the border is 12 * 10 = 120 square inches. The area of the border is the area of the frame with the border minus the area of the frame: 120 - 48 = 72 square inches. #### 72
The length of a house is 12 meters. The length of a garden is 8 meters. What is the ratio of the length of the house to the length of the garden?	First, we need to simplify the ratio. Divide both numerator and denominator by the greatest common divisor. Since both numbers are divisible by 4, we can divide them by 4. Therefore, the ratio of the length of the house to the length of the garden is 3:2. #### 3/2
In a sports team, the ratio of men to women is 7:3. If there are 42 men, how many women are there?	To find the number of women, we need to find the multiplier. Since 7 multiplied by 6 is 42, the multiplier is 6. Multiply the number of women by the multiplier. Therefore, there are 3 * 6 = 18 women. #### 18
The area of a triangle is 40 cm^2. If the base of the triangle is 8 cm, what is its height?	The area of a triangle is given by the formula: area = (base * height) / 2. Plug in the given values. 40 = (8 * height) / 2. Multiply both sides by 2. 80 = 8 * height. Divide both sides by 8. Height = 80 / 8 = 10. Therefore, the height of the triangle is 10 cm. #### 10
A bookstore sells 400 books per week. They make 20 boxes of books and each box contains 15 books. How many books are left?	First, calculate the total number of books in the boxes. There are 20 boxes and each box contains 15 books. Therefore, the total number of books in the boxes is 20 * 15 = 300 books. Now, subtract the number of books in the boxes from the total number of books sold. There are 400 - 300 = 100 books left. #### 100
A laptop is on sale for 20 percent off its original price of 1200. How much will you pay for the laptop?	Calculate the discount. 20% of 1200 is 1200 * 0.2 = 240. Now, subtract the discount from the original price. The laptop will cost 1200 - 240 = 960 dollars. #### 960
Samantha has 180 pencils. She gives 25 pencils to her friend and buys 12 more. How many pencils does Samantha have now?	First, subtract the number of pencils given away: 180 - 25 = 155. Then, add the number of pencils bought: 155 + 12 = 167 #### 167
Jason has a rectangular picture frame with a perimeter of 32 inches. If the length of the frame is 8 inches, what is the width of the frame?	The formula for perimeter is P = 2l + 2w, where l is length and w is width. Plugging in the given values, 32 = 2(8) + 2w. Simplifying, 32 = 16 + 2w. Subtracting 16 from both sides, 2w = 16. Dividing both sides by 2, w = 8 #### 8
What is the value of y in the equation 3y - 2 = 14?	First, add 2 to both sides: 3y - 2 + 2 = 14 + 2. Simplifying, 3y = 16. Dividing both sides by 3, y = 16/3. Simplifying, y = 5 1/3 #### 16/3
A video game costs $40. They offer a 15% discount. How much will the video game cost after the discount?	First, calculate the discount amount: $40 x 0.15 = $6. Then, subtract the discount from the original price: $40 - $6 = $34 #### 34
A set of marbles contains 5 red, 8 blue, and 12 green marbles. What is the probability of randomly selecting a blue marble?	The total number of marbles is 5 + 8 + 12 = 25. The number of blue marbles is 8. The probability is the number of blue marbles divided by the total number of marbles: 8/25 #### 8/25
A company has 15 machines that produce identical parts. The company operates 8 hours a day. If each machine produces 20 parts per hour, how many parts does the company produce in a day?	To find the total parts produced by the company in a day, we need to multiply the number of machines by the number of parts each machine produces per hour, and then multiply the result by the number of hours the company operates. The calculation is as follows: 15 machines * 20 parts/hour/machine * 8 hours = 2400 parts #### 2400
In a school, 120 students are studying commerce, 80 students are studying arts, and the rest are studying science. If the total number of students is 250, how many students are studying science?	To find the number of students studying science, we need to subtract the number of students studying commerce and arts from the total number of students. The calculation is as follows: 250 total students - 120 commerce students - 80 arts students = 50 science students #### 50
A group of friends want to share some candy equally. If they have 48 candies and there are 8 friends, how many candies will each friend get?	To find the number of candies each friend will get, we need to divide the total number of candies by the number of friends. The calculation is as follows: 48 candies / 8 friends = 6 candies/friend #### 6
A person has $120 in his wallet. He spends $25 on breakfast, $15 on lunch, and $30 on dinner. How much money does he have left?	To find the amount of money the person has left, we need to subtract the amount he spent on breakfast, lunch, and dinner from the initial amount of money he had. The calculation is as follows: 120 initial amount - 25 breakfast - 15 lunch - 30 dinner = 50 left #### 50
A factory produces 500 units of a product per day. If the factory operates for 25 days in a month, how many units of the product are produced in a month?	To find the total units of the product produced in a month, we need to multiply the number of units produced per day by the number of days the factory operates. The calculation is as follows: 500 units/day * 25 days = 12500 units #### 12500
A rectangular swimming pool is 25 meters long and 12 meters wide. If a path that is 2 meters wide is built around the pool, what is the area of the path?	The area of the pool is 25 x 12 = 300 square meters. The area of the pool including the path is (25 + 2 x 2) x (12 + 2 x 2) = 29 x 16 = 464 square meters. The area of the path is therefore 464 - 300 = 164 square meters. #### 164
A basketball team won 75% of their 20 games in the season. How many games did they win?	20 x 0.75 = 15. #### 15
A bakery sells a total of 240 loaves of bread per day. They sell a combination of whole wheat and white bread. If they sell 30 more whole wheat loaves than white bread loaves, and they sell a total of 120 whole wheat loaves, how many white bread loaves do they sell per day?	Let x be the number of white bread loaves. Then 120 is the number of whole wheat loaves. We know that the number of whole wheat loaves is 30 more than the number of white bread loaves, so 120 = x + 30. Also, the total number of loaves is 240, so x + 120 = 240. Solving these equations, we get x = 90. #### 90
A car travels from city A to city B at an average speed of 60 kilometers per hour and returns at an average speed of 40 kilometers per hour. What is the average speed for the entire trip?	Let the distance between city A and city B be x. The total distance traveled is 2x. The time taken to travel from A to B is x/60 and the time taken to travel from B to A is x/40. The total time taken is x/60 + x/40 = (2x + 3x)/120 = 5x/120. The average speed is therefore (2x) / (5x/120) = 48. #### 48
A school has 30 teachers and 20 staff members. If 20% of the teachers and 15% of the staff members are married, how many people in the school are married?	20% of the teachers are married, so 0.2 x 30 = 6 teachers are married. 15% of the staff members are married, so 0.15 x 20 = 3 staff members are married. Therefore, 6 + 3 = 9 people in the school are married. #### 9
A company produces 2400 calculators in 8 hours. How many calculators will the company produce in 12 hours?	First, we calculate how many calculators are produced per hour: 2400 / 8 = 300. Then, we multiply this rate by 12 hours: 300 * 12 = 3600. #### 3600
John has 120 cookies packed in 8 identical boxes. How many cookies are in each box?	To find out how many cookies are in each box, we divide the total number of cookies by the number of boxes: 120 / 8 = 15. #### 15
The ratio of boys to girls in a school is 5:7. If there are 240 students, how many girls are in the school?	Let's use the ratio to set up an equation. The total number of students is the sum of the number of boys and girls, so 5x + 7x = 240, where x is the common multiplier of the ratio. Solving for x, we get x = 20. The number of girls is 7 * 20 = 140. #### 140
A rectangular garden measures 20 meters by 10 meters. If a path that is 2 meters wide is built around the garden, what is the area of the path?	The area of the garden itself is 20 * 10 = 200. The outer dimensions of the garden, including the path, are 24 meters by 14 meters. The area of the garden, including the path, is 24 * 14 = 336. Finally, the area of the path is 336 - 200 = 136. #### 136
A snail covers 15 meters in 5 hours. How many meters will it cover in 7 hours?	First, we calculate the snail's speed in meters per hour: 15 / 5 = 3. Then, we multiply this speed by the time: 3 * 7 = 21. #### 21
The probability of drawing a spade from a standard deck of 52 cards is q. What is the value of q?	There are 13 cards of each suit in a standard deck of 52 cards. There are 4 suits: hearts, diamonds, spades, and clubs. So, there are 13 spades in the deck. The probability of drawing a spade is the number of spades divided by the total number of cards, which is 52. q = 13/52 = 13/52 = 0.25 #### 0.25
A taxi travels from one end of the city to the other at an average speed of 40 km per hour. If the distance between the two ends is 240 km, how many hours does it take for the taxi to travel from one end to the other?	To find the time taken, divide the distance by the speed. time = distance / speed = 240 km / 40 km/h = 6 hours #### 6
A company sends 480 packages per day. They pack 16 packages in each box. How many boxes do they need?	To find the number of boxes, divide the number of packages by the number of packages per box. Number of boxes = 480 packages / 16 packages/box = 30 boxes #### 30
A gardener has 35 meters of wire. He cuts it into pieces of 0.7 meters each. How many pieces of wire does the gardener have now?	To find the number of pieces, divide the total length of wire by the length of each piece. Number of pieces = 35 meters / 0.7 meters/piece = 50 pieces #### 50
A driver travels from city A to city B at 70 km/h and returns at 50 km/h. What is the average speed for the round trip?	First, find the average speed for each leg of the trip. The average speed for the first leg is 70 km/h and for the second leg is 50 km/h. So, the average speed for the round trip is the harmonic mean of the two speeds. average speed = 2 * 70 * 50 / (70 + 50) km/h = 58.33 km/h #### 58.33
In a stack of 12 boxes, each box weighs 3 kilograms. If 4 more boxes are added, and each of these boxes weighs 4 kilograms, what is the total weight of the stack of boxes?	Let's calculate the total weight of the original 12 boxes: 12 x 3 = 36 kilograms. Then, calculate the weight of the 4 additional boxes: 4 x 4 = 16 kilograms. Finally, add the weights together: 36 + 16 = 52 kilograms. #### 52
A bakery is making a batch of 120 cookies. If they want to package 6 cookies in each bag, how many bags can they make?	Divide the total number of cookies by the number of cookies per bag: 120 ÷ 6 = 20 bags. #### 20
A right triangle has one leg of length 8 and a hypotenuse of length 10. What is the length of the other leg?	Use the Pythagorean theorem: a^2 + b^2 = c^2, where a and b are the legs, and c is the hypotenuse. Plugging in the values, we get: 8^2 + b^2 = 10^2, which simplifies to: 64 + b^2 = 100. Subtracting 64 from both sides, we get: b^2 = 36. Taking the square root of both sides, we get: b = 6. #### 6
If Sally can paint a house in 6 hours, and John can paint the same house in 4 hours, how long will it take for them to paint the house together?	Let's calculate the rate at which Sally paints the house: 1 house / 6 hours = 1/6 of a house per hour. Let's calculate the rate at which John paints the house: 1 house / 4 hours = 1/4 of a house per hour. When they work together, their combined rate is the sum of their individual rates: (1/6 + 1/4) = (2+3)/12 = 5/12 of a house per hour. To find the time it takes to paint the house together, divid…
What is the value of y if 3y - 2 = 14?	Add 2 to both sides of the equation to get: 3y = 14 + 2, which simplifies to: 3y = 16. Divide both sides by 3 to solve for y: y = 16 ÷ 3, which simplifies to: y = 16/3, or y = 5.33 (rounded to two decimal places). #### 5.33
Emily bought 2 baskets of apples. Each basket has 12 apples. How many apples does Emily have in total?	Emily bought 2 x 12 apples = 24 apples.#### 24
A bookstore sells 250 copies of a novel on a certain day. If the profit on each copy is 15% of the selling price, and the selling price of each copy is $4, what is the total profit of the bookstore?	First, find the profit per copy: 15% of $4 = $0.6. Next, find the total profit: 250 copies x $0.6 = $150.#### 150
In a test, 40% of the students scored above 80. If 200 students took the test, how many scored above 80?	First, convert the percentage to a decimal: 40% = 0.4. Next, find the number of students: 0.4 x 200 = 80.#### 80
A bicycle travels from Point A to Point B. If it travels 180 km in 3 hours, how many km will it travel in 5 hours?	First, find the speed: 180 km ÷ 3 hours = 60 km/hour. Next, find the distance traveled: 60 km/hour x 5 hours = 300 km.#### 300
Olivia has 15 bags of flour to pack into crates of 5 bags each. How many crates of flour can Olivia make?	Divide the number of bags by the number of bags per crate: 15 ÷ 5 = 3.#### 3
A triangle has a base of 8 cm and a height of 9 cm. What is its area?	The area of a triangle is given by (base * height)/2. (8 * 9)/2 = 72/2 = 36. ####36
A book costs 30 dollars. If a 20% discount is applied, how much will the buyer pay?	A 20% discount is equivalent to 80% of the original price. (0.8 * 30) = 24. ####24
A rectangular garden has an area of 200 square meters. If its length is 20 meters, what is its width?	The area of a rectangle is given by length times width. Let the width be w. Then, 20 * w = 200. w = 200/20. w = 10. ####10
A delivery company charges a base rate of 10 dollars and 2 dollars per mile. If a customer travelled 8 miles, how much did she pay?	The customer pays the base rate of 10 dollars plus 8 * 2 = 16 dollars. 10 + 16 = 26. ####26
What is the value of x in the equation 2x + 5 = 11?	Subtract 5 from both sides of the equation to get 2x = 11 - 5. 2x = 6. Divide both sides by 2 to get x = 6/2. x = 3. ####3
Tom can paint a room in 4 hours and his brother can paint the same room in 6 hours. If they work together, how many hours will it take them to paint the room?	If Tom can paint a room in 4 hours, then Tom's rate of work is 1 room / 4 hours = 1/4 room per hour. If his brother can paint the same room in 6 hours, then his brother's rate of work is 1 room / 6 hours = 1/6 room per hour. If they work together, their combined rate of work is (1/4 + 1/6) room per hour. To find a common denominator, convert 1/4 to 3/12 and 1/6 to 2/12. Add them to get 5/12 room …
A factory produces 300 toys in 10 hours. If they operate at the same rate, how many toys can they produce in 15 hours?	If the factory produces 300 toys in 10 hours, then they produce 300 / 10 = 30 toys per hour. To find out how many toys they can produce in 15 hours, multiply their rate of work by 15. So, 30 toys per hour * 15 hours = 450 toys. #### 450
A restaurant sells 120 burgers in 4 hours. If they sell burgers at the same rate, how many burgers can they sell in 8 hours?	If the restaurant sells 120 burgers in 4 hours, then they sell 120 / 4 = 30 burgers per hour. To find out how many burgers they can sell in 8 hours, multiply their rate of work by 8. So, 30 burgers per hour * 8 hours = 240 burgers. #### 240
A mechanic can fix 3 cars in 6 hours. If he works at the same rate, how many cars can he fix in 9 hours?	If the mechanic can fix 3 cars in 6 hours, then he fixes 3 / 6 = 1/2 car per hour. To find out how many cars he can fix in 9 hours, multiply his rate of work by 9. So, (1/2 car per hour) * 9 hours = 4.5 cars. #### 4.5
A farmer harvests 150 kilograms of wheat from a 5-hectare field. If the yield of wheat is the same per hectare, how many kilograms of wheat can he harvest from a 12-hectare field?	If the farmer harvests 150 kilograms of wheat from a 5-hectare field, then he harvests 150 / 5 = 30 kilograms per hectare. To find out how many kilograms of wheat he can harvest from a 12-hectare field, multiply his yield per hectare by 12. So, 30 kilograms per hectare * 12 hectares = 360 kilograms. #### 360
A bike travels 40 kilometers in 4 hours. How many kilometers does the bike travel per hour?	First, divide the total distance by the total time: 40 kilometers / 4 hours = 10 kilometers per hour. #### 10
The perimeter of a triangle is 30 more than its area. If the base of the triangle is 6, what is the height?	Let's call the height h. The perimeter is 2 times the base plus the height, plus the other side, which we'll call s. The area is 1/2 times the base times the height. Set up the equation: 2(6) + h + s = 30 + (1/2)(6)(h). Simplify: 12 + h + s = 30 + 3h. Since s is not given, let's use the fact that s = h (an isosceles triangle). Replace s with h: 12 + h + h = 30 + 3h. Subtract 12 and 3h from both s…
A bus is traveling from City A to City B. If the distance between the two cities is 300 kilometers and the bus is traveling at a speed of 50 kilometers per hour, how many hours will it take to reach City B?	Divide the total distance by the speed: 300 kilometers / 50 kilometers per hour = 6 hours. #### 6
The trapezoid in the diagram has a height of 10 cm, a smaller base of 7 cm, and a larger base of 11 cm. What is the area of the trapezoid?	The formula for the area of a trapezoid is 1/2 times the height times the sum of the bases. Plug in the numbers: 1/2 (10) (7 + 11) = 1/2 (10) (18) = 90. #### 90
Roderick is making a circular garden with a radius of 6 meters. If he wants to install a 1.5-meter wide path surrounding the garden, what is the area of the path?	First, find the area of the garden: A = πr^2 = π(6)^2 = 36π. Next, find the area of the larger circle (including the path): A = πr^2 = π(6 + 1.5)^2 = π(7.5)^2 = 56.25π. The area of the path is the difference between the areas: 56.25π - 36π = 20.25π. #### 63.62
A factory produces 18 boxes of crayons per hour. If the factory operates for 8 hours a day, how many boxes of crayons will it produce in a day?	The factory produces 18 boxes of crayons per hour. In 8 hours, it will produce 18 * 8 = 144 boxes. #### 144
There are 24 students in a class, and each student has 3 pencils. If 4 more students join the class, how many pencils will the class have in total?	There are 24 students, each with 3 pencils, so there are 24 * 3 = 72 pencils. If 4 more students join the class, the total number of pencils will be 72 + 4 * 3 = 72 + 12 = 84. #### 84
The average of 3 numbers is 25. If the largest number is 35, what is the sum of the other 2 numbers?	Let the 2 other numbers be x and y. The average of the 3 numbers is 25, so (x + y + 35) / 3 = 25. Multiplying both sides by 3, we get x + y + 35 = 75. Subtracting 35, we get x + y = 40. #### 40
A cuboid has a length of 5 cm, a width of 3 cm, and a height of 4 cm. What is the surface area of the cuboid?	The surface area of a cuboid is 2(lw + lh + wh). Plugging in the values, we get 2(5*3 + 5*4 + 3*4) = 2(15 + 20 + 12) = 2(47) = 94. #### 94
A television is on sale for 20 percent off its original price of 1200. How much will you pay for the television?	The discount is 20% of 1200, which is 0.2 * 1200 = 240. The price after discount is 1200 - 240 = 960. #### 960
A bakery sells a total of 35 cakes and pastries on a daily basis. If the bakery sells an equal number of cakes and pastries, how many cakes does the bakery sell in a day?	The bakery sells an equal number of cakes and pastries. 35 is divided by 2 to find the number of cakes sold. 35 ÷ 2 = 17.5 cakes. Since it's not possible to sell a fraction of cake, the bakery sells 17 cakes and 18 pastries. #### 17
A gardener wants to create a rectangular garden with a length that is 5 inches more than its width. If the area of the garden is 48 square inches, what is the length of the garden?	Let the width be w. The length is 5 inches more than the width, so it's w + 5. The area of the rectangle is length times width. w(w + 5) = 48. Expand the equation to get w^2 + 5w - 48 = 0. Solve the quadratic equation by factoring: (w + 8)(w - 6) = 0. This gives two solutions: w = -8 (which is rejected since width cannot be negative) or w = 6. The length is 6 + 5 = 11 inches. #### 11
The angles of a triangle are in the ratio 2:3:5. What is the measure of the smallest angle?	The sum of angles of a triangle is 180 degrees. Let's find the total parts in the ratio: 2 + 3 + 5 = 10 parts. Divide 180 by the total parts to find the measure of each part: 180 ÷ 10 = 18 degrees. Multiply the smallest ratio (2) by the measure of each part to find the smallest angle: 2 x 18 = 36 degrees. #### 36
A furniture store offers a discount of 10% on a table that originally costs $250. How much will a customer pay for the table after the discount?	First, find the discount by multiplying the original price by the discount percentage: $250 x 0.1 = $25. Subtract the discount from the original price to find the amount the customer will pay: $250 - $25 = $225. #### 225
A runner completes a lap around a track in 3 minutes and 45 seconds. If the runner completes 8 laps, what is the total time taken?	Convert the time taken for 1 lap from minutes and seconds to seconds: 3 minutes = 3 x 60 = 180 seconds. Add the seconds: 180 + 45 = 225 seconds for 1 lap. Multiply the time taken for 1 lap by the number of laps: 225 x 8 = 1800 seconds. Convert the total time from seconds back to minutes and seconds: 1800 ÷ 60 = 30 minutes. The remaining seconds is 1800 - 30 x 60 = 0 seconds. The total time taken …
A small bird is perched on a tree branch 15 feet above the ground. Each day, it flies down 2 feet, but at night, a strong gust of wind blows it up 1 foot. How many days will it take for the bird to reach the ground?	If the bird flies down 2 feet each day and blows up 1 foot at night, then it effectively moves down 2 - 1 = 1 foot each day. Since the bird is 15 feet above the ground, it will take 15 feet / 1 foot/day = 15 days to reach the ground. #### 15
A circular pool has a diameter of 80 meters. What is the circumference of the pool?	Circumference of a circle = pi * diameter = pi * 80 = 3.14 * 80 = 251.2. #### 251.2
In a right triangle, the length of the hypotenuse is 14 cm and one of the legs is 10 cm. What is the length of the other leg?	Let the other leg be x cm. By Pythagoras theorem, 14^2 = x^2 + 10^2. Solving for x, x = sqrt(14^2 - 10^2) = sqrt(196 - 100) = sqrt(96) = 9.8. #### 9.8
What is the probability that a randomly drawn card from a deck of cards is a spade?	There are 52 cards in a deck with 13 spades. So, probability of drawing a spade = 13/52 = 1/4 = 0.25. #### 0.25
A factory produces a total of 180 machines per day. They produce a combination of laptops and desktops. If they produce 20 more laptops than desktops, and they produce 100 laptops, how many desktops do they produce?	Let the number of desktops produced be x. Then, number of laptops produced = x + 20. We know that total machines produced = laptops + desktops = 180. So, x + 20 + x = 180. Solving for x, 2x = 180 - 20, x = 80. #### 80
If a bicycle costs $120. It's on sale for 8% off. How much will the bicycle cost after the discount?	If the bicycle costs $120, an 8% discount means we have to subtract 8% of $120, which is 8/100 * 120 = 0.08 * 120 = $9.60. So, the final cost will be $120 - $9.60 = $110.40 #### 110.40
A fair six-sided die is rolled 8 times. What is the probability that it lands on an even number exactly 5 times?	The probability of landing on an even number with a single roll is 3/6 = 1/2. So, the probability of landing on an even number 5 times and odd number 3 times is (1/2)^5 * (1/2)^3 = 1/32. There are C(8, 5) = 56 ways to order 5 even numbers and 3 odd numbers. Hence, the probability is 56 * 1/32 = 56/32 = 7/4 = 7/4 = 7/4 = 7/4 #### 7/4
A certain type of virus grows according to the equation P(t) = 2e^0.3t, where P is the population at time t in hours. What is the population after 5 hours?	Substitute t = 5 hours into the equation to get P(5) = 2e^0.3 * 5 = 2e^1.5. Use a calculator or approximation to get P(5) ≈ 2 * 4.4817 = 8.9634. #### 8.9634
Lily has a rectangular prism with a length of 5 meters, a width of 3 meters, and a height of 2 meters. If she wants to wrap the prism with wrapping paper, what is the surface area of the prism?	The surface area of the prism is 2(lw + lh + wh) = 2(5*3 + 5*2 + 3*2) = 2(15 + 10 + 6) = 2(31) = 62. #### 62
A car rental company earns $40 for each car rental. If it rents 35 cars, what is the total amount of money earned by the company?	The total amount earned by the company is the number of car rentals times the amount earned per car, which is 35 * 40 = 1400. #### 1400
A fair coin is flipped 3 times. What is the probability that the head appears exactly once?	The probability of flipping a head is 1/2 and the probability of flipping a tail is also 1/2. There are 8 possible outcomes when flipping a coin 3 times. If a head appears exactly once, the outcomes are HTT, THT, or TTH. The probability of each outcome is (1/2)^3, so the probability of flipping exactly one head is 3*(1/2)^3 = 3/8. #### 3/8
The perimeter of a rectangle is 20 centimeters, and its length is 4 centimeters. What is the width of the rectangle?	Let the width of the rectangle be w. The perimeter is 2*(l + w), where l is the length. Since the perimeter is 20, we have 2*(4 + w) = 20. 8 + 2w = 20, so 2w = 12, and w = 6. #### 6
A rectangular swimming pool measures 8 meters by 4 meters. If a deck that is 2 meters wide is built around the pool, what is the area of the deck?	The area of the pool is 8*4 = 32 square meters. The area of the deck and pool together is (8 + 2*2)*(4 + 2*2) = 12*8 = 96 square meters. So, the area of the deck is 96 - 32 = 64 square meters. #### 64
Ben has $x in his account. He deposited an additional 50 dollars and withdrew 1/5 of the total amount in his account. What fraction of his original balance did he withdraw?	Ben originally had x dollars. After depositing 50 dollars, he had x + 50 dollars. He withdrew 1/5 of x + 50, which is (x + 50)/5. As a fraction of his original balance, this is ((x + 50)/5)/x = (x + 50)/(5x) = 1/5 + 50/(5x) = 1/5 + 10/x. #### 1/5 + 10/x
The area of a trapezoid is 72 square inches, and its height is 8 inches. If the shorter base is 5 inches, what is the longer base?	Let the longer base be b. The area of a trapezoid is (h/2)*(b1 + b2), where h is the height and b1 and b2 are the bases. So, (8/2)*(5 + b) = 72. 4*(5 + b) = 72, so 5 + b = 18, and b = 13. #### 13
A bookstore sells 300 books at $5 each. How much money did the bookstore make?	The bookstore sells 300 books, and each book costs $5, so the bookstore makes 300 x 5 = 1500 dollars in total. #### 1500
In a group of 15 students, the number of ways to select a committee of 4 students is?	This is a combination problem, since order does not matter. We can use the combination formula, which is nCr = n! / (r!(n-r)!), where n is the total number of students and r is the number of students to select. In this case, n = 15 and r = 4. nCr = 15! / (4!(15-4)!) = 15! / (4!11!) = (15 * 14 * 13 * 12 * 11 * 10 * 9 * 8 * 7 * 6 * 5 * 4 * 3 * 2 * 1) / ((4 * 3 * 2 * 1) * (11 * 10 * 9 * 8 * 7 * 6 * …
A bag contains 4 red balls, 5 blue balls, and 1 green ball. What is the probability of drawing a red ball from the bag?	There are a total of 4 + 5 + 1 = 10 balls in the bag. The probability of drawing a red ball is the number of red balls divided by the total number of balls, which is 4/10 = 2/5. #### 2/5
A company has 80 employees, 40 of whom are males and the rest are females. If 15 males are promoted, what fraction of employees are promoted?	There are a total of 80 employees, and 15 males are promoted. The fraction of employees promoted is 15/80 = 3/16. #### 3/16
A circular garden has a radius of 8 meters. If a path that is 0.5 meters wide is built around the garden, what is the area of the path?	The area of the original garden is A = π * r^2 = π * 8^2 = 64π. The area of the garden with the path is A = π * (8 + 0.5)^2 = π * 8.5^2 = 72.25π. The area of the path is the difference between the two areas, which is 72.25π - 64π = 8.25π ≈ 25.88. #### 25.88
What is the average of the following set of data: 2, 4, 6, 8, 10?	To find the average, add the number in the set: 2 + 4 + 6 + 8 + 10 = 30. Next, divide the sum by the number of elements in the set: 30 ÷ 5 = 6. The average is 6. #### 6
A small rectangular garden measures 5 yards by 3 yards. If a fence is to be installed around the garden, what is the length of fencing required?	To find the length of fencing required, find the perimeter of the rectangular garden by adding the lengths of all its sides. The perimeter is 5 + 3 + 5 + 3 = 16 yards. #### 16
Mary has 150 stickers in her collection. She gives 15 stickers to her friend and buys 25 more stickers. How many stickers does Mary have now?	First, subtract the number of stickers Mary gave away from the original number: 150 - 15 = 135. Then, add the number of new stickers she bought: 135 + 25 = 160. Mary has 160 stickers now. #### 160
In a batch of cookies, 75% of the cookies were chocolate chip. 15% of the chocolate chip cookies were burnt. If there were 120 cookies in total, how many burnt cookies were there?	First, find the number of chocolate chip cookies: 120 x 0.75 = 90 cookies. Then, find the number of burnt cookies: 90 x 0.15 = 13.5. Since you can't have a fraction of a cookie, round down to 13 burnt cookies. #### 13
A right triangle has a hypotenuse of length 12 inches and one leg of length 9 inches. What is the length of the other leg?	Use the Pythagorean theorem: a^2 + b^2 = c^2, where a and b are the legs and c is the hypotenuse. 9^2 + b^2 = 12^2, so 81 + b^2 = 144. Subtract 81 from both sides: b^2 = 63. Take the square root of both sides: b = √63. b ≈ 7.937, round to 8. The length of the other leg is approximately 8 inches. #### 8
A rectangular prism has 6 faces with different areas. How many permutations of faces are possible?	The formula for permutations is n!, where n is the number of items. In this case, n is 6, so the number of permutations is 6! = 6 × 5 × 4 × 3 × 2 × 1 = 720. #### 720
A plane traveled 1200 kilometers in 8 hours. How many kilometers did it travel per hour?	Divide the total number of kilometers traveled by the number of hours to get the rate per hour. So, 1200 km ÷ 8 h = 150 km/h. #### 150
A boat travels from Port A to Port B at an average speed of 20 km/h and returns at an average speed of 30 km/h. What is the average speed for the entire trip?	Let's call the distance between Port A and Port B "d". Then, the total distance traveled is 2d. The total time taken is the sum of the times taken for each leg of the journey, which is d/20 + d/30. To get the average speed, divide the total distance by the total time. So, the average speed is 2d / (d/20 + d/30). Simplify the expression to get 24 km/h. #### 24
In a right triangle, the length of one leg is 12 and the other leg is 5. What is the length of the hypotenuse?	Use the Pythagorean theorem, which states that a^2 + b^2 = c^2, where a and b are the lengths of the legs and c is the length of the hypotenuse. Plug in the values given to get 12^2 + 5^2 = c^2. Simplify to get c^2 = 144 + 25 = 169, so c = √169 = 13. #### 13
A bookstore has 120 novels on its shelves originally. It orders 80 more to be delivered at the end of the month. How many novels will it have on its shelves at the end of the month?	Add the number of novels originally to the number of novels ordered. So, 120 + 80 = 200. #### 200
A teacher has 2 times as many students as a tutor. The tutor has 8 students. How many students does the teacher have?	Let's say the number of students the tutor has = x. Since the teacher has 2 times as many students as a tutor, the teacher has = 2 * x students. If the tutor has 8 students, then x = 8. So, the teacher has 2 * 8 students = 16 students. #### 16
A pen and a notebook together cost 5.50 dollars. The pen costs 0.70 dollars more than the notebook. How much does the notebook cost?	Let's say the cost of the notebook = x dollars. The pen costs 0.70 dollars more than the notebook, so the cost of the pen is = x + 0.70 dollars. The total cost of the pen and the notebook is 5.50 dollars, so we can set up the equation x + (x + 0.70) = 5.50. Simplifying the equation, we get 2x + 0.70 = 5.50. Subtracting 0.70 from both sides, we get 2x = 4.80. Dividing both sides by 2, we get x = 2…
From a bag containing 3 blue balls, 5 red balls, and 2 green balls, what is the probability of drawing a red ball or a blue ball?	The total number of balls = 3 + 5 + 2 = 10 balls. The number of red balls or blue balls = 3 + 5 = 8 balls. The probability of drawing a red ball or a blue ball = 8/10 = 0.8. #### 0.8
A store has 5 types of shirts and 7 types of pants. What is the number of ways to select 1 shirt and 1 pant from the store?	There are 5 ways to select 1 shirt. For each of the 5 shirts, there are 7 ways to select 1 pant. Using the fundamental counting principle, the number of ways to select 1 shirt and 1 pant = 5 * 7 = 35 ways. #### 35
A company sells 300 units of product A at $10 each and 200 units of product B at $8 each. How much money did the company make in total?	The total money made from product A = 300 * 10 = 3000 dollars. The total money made from product B = 200 * 8 = 1600 dollars. The total money made by the company = 3000 + 1600 = 4600 dollars. #### 4600
A rectangular garden has a length of 12 meters and a width of 8 meters. If a path of 2 meters is built around the garden, what is the area of the path?	To find the area of the path, we need to find the outer and inner perimeters of the garden. The outer length and width are 12 + 2 + 2 = 16 meters and 8 + 2 + 2 = 12 meters respectively. The outer perimeter is 2(16 + 12) = 56 meters. The inner perimeter is 2(12 + 8) = 40 meters. The area of the path is the difference between the outer and inner perimeters multiplied by the width of the path. The a…
A mixture of 15 liters of milk and 25 liters of water has a ratio of milk to water of 3:5. If 5 liters of milk and 5 liters of water are added to the mixture, what is the new ratio of milk to water?	Initially, there are 15 liters of milk and 25 liters of water. After adding 5 liters of milk and 5 liters of water, the new quantities are 15 + 5 = 20 liters of milk and 25 + 5 = 30 liters of water. The new ratio is 20:30, which can be simplified to 2:3. #### 2:3
A bicycle travels from city A to city B at an average speed of 20 km/h and returns at an average speed of 30 km/h. What is the average speed of the bicycle for the entire trip?	Let the distance between city A and city B be x km. The total time taken for the trip is (x/20) + (x/30) hours. The total distance is 2x km. The average speed is total distance / total time taken. The average speed is 2x / ((x/20) + (x/30)) = 24 km/h. #### 24
A factory produces 250 units of a product every day. If the factory operates for 25 days a month, how many units of the product will it produce in a year?	The factory produces 250 units every day. In a month, it produces 250 * 25 = 6250 units. In a year, it produces 6250 * 12 = 75000 units. #### 75000
In a group of 10 students, 4 students can speak French, 6 students can speak Spanish, and 2 students can speak both French and Spanish. What is the probability that a randomly selected student can speak Spanish or French?	The total number of students who can speak Spanish or French is 4 + 6 - 2 = 8. The probability is 8/10 = 0.8. #### 0.8
What is the value of y in the equation 3y - 2 = 14?	To find the value of y, add 2 to both sides of the equation, which results in 3y = 16. Then, divide both sides by 3, which gives y = 16 / 3. #### 5.33
A library has 20 shelves, and each shelf can hold 15 books. If the library is currently empty, how many books can they hold in total?	Multiply the number of shelves by the number of books each shelf can hold. This gives 20 x 15 = 300. #### 300
What is the value of x that satisfies the equation sin(x) = 1/2?	Use the inverse sine function to find the value of x. This gives x = arcsin(1/2). x = 30 degrees or π/6 radians. #### 30
David has 150 dollars. He spends 20 dollars on food, 30 on clothing, and 40 on entertainment. How much does he have left?	Subtract the amount spent from the initial amount. This gives 150 - (20 + 30 + 40) = 150 - 90 = 60. #### 60
A car travels from city A to city B at 50 km/h and returns at 30 km/h. What is the average speed for the round trip?	Let the distance between city A and city B be x. The total distance traveled is 2x. The total time taken is x/50 + x/30 = 2x/50 + 3x/50 = 5x/50 = x/10. The average speed is the total distance divided by the total time taken. This gives 2x / (x/10) = 20. #### 20
If a bakery sells 250 loaves of bread at $2 each, how much money does the bakery make in total?	The bakery sells 250 loaves of bread at $2 each. To find the total money, multiply the number of loaves and the price of each loaf. 250 * 2 = 500. #### 500
In a rectangular garden, the ratio of the lengths of the sides is 2:3. If the longer side has a length of 24, what is the length of the shorter side?	The ratio of the lengths of the sides is 2:3. Let the shorter side be 2x and the longer side be 3x. The longer side has a length of 24, so set 3x equal to 24. 3x = 24 => x = 24 / 3 => x = 8. The shorter side is 2x, so 2 * 8 = 16. #### 16
A snail moves at a speed of 0.2 km/h. If it travels for 5 hours, how many kilometers does it travel?	The snail moves at a speed of 0.2 km/h. To find the distance, multiply the speed and the time. 0.2 * 5 = 1. #### 1
If 3 people can paint a house in 6 hours, how many people are needed to paint the same house in 4 hours?	If 3 people can paint a house in 6 hours, they paint 1/6 of the house in 1 hour. To paint the same house in 4 hours, divide 1/6 by 4. (1/6) / 4 = 1/24. To paint 1 house, divide 1 by 1/24. 1 / (1/24) = 24 / 1 = 24. Divide 24 by 4 to find the number of people. 24 / 4 = 6. #### 6
In a group of people, the ratio of men to women is 2:5. If there are 15 women, how many men are there?	The ratio of men to women is 2:5. Let the number of men be 2x and the number of women be 5x. There are 15 women, so set 5x equal to 15. 5x = 15 => x = 15 / 5 => x = 3. The number of men is 2x, so 2 * 3 = 6. #### 6
A coffee shop sells a total of 300 cups of coffee and tea on a certain day. The ratio of coffee to tea is 2:3. How many cups of tea were sold?	Let x represent the number of cups of coffee and let y represent the number of cups of tea. We know the total number of cups is 300, so x + y = 300. We also know the ratio of coffee to tea is 2:3, so x/y = 2/3. We can rewrite this as x = 2y/3. Substituting this into x + y = 300, we get (2y/3) + y = 300. Solving for y, we get y = 180. #### 180
A library has 7 shelves, and each shelf can hold 12 books. If the library already has 42 books, how many more books can be placed on the shelves?	The library can hold 7 x 12 = 84 books in total. Since it already has 42 books, it can hold 84 - 42 = 42 more books. #### 42
A toy factory produces 240 toys in a day. The factory produces toy cars and dolls in a ratio of 5:3. How many dolls does the factory produce in a day?	Let x represent the number of toy cars and let y represent the number of dolls. We know the total number of toys is 240, so x + y = 240. We also know the ratio of toy cars to dolls is 5:3, so x/y = 5/3. We can rewrite this as x = 5y/3. Substituting this into x + y = 240, we get (5y/3) + y = 240. Solving for y, we get y = 90. #### 90
A rectangular garden has a length of 15 meters and a width of 8 meters. If a path that is 2 meters wide is built around the garden, what is the area of the path?	The area of the garden is 15 x 8 = 120 square meters. The area of the outer rectangle (including the path) is (15 + 2 + 2) x (8 + 2 + 2) = 19 x 12 = 228 square meters. The area of the path is 228 - 120 = 108 square meters. #### 108
In a certain store, 20% of the customers are students. If there are 250 customers in total, how many students are there in the store?	20% of 250 customers are students, so the number of students is 0.2 x 250 = 50. #### 50
A bookshelf has 18 books on it. 8 more books are added to the bookshelf. Later, 5 books are removed. How many books are on the bookshelf now?	First, 18 + 8 = 26 books. Then, 26 - 5 = 21. #### 21
If a group of 16 people share 32 pizzas equally, how many pizzas does each person get?	To find the number of pizzas each person gets, divide 32 by 16. 32 / 16 = 2. #### 2
A car travels 150 miles in 5 hours. How many miles does it travel per hour?	To find the speed of the car, divide 150 by 5. 150 / 5 = 30. #### 30
What is the value of x in the equation 2x + 5 = 11?	Subtract 5 from both sides: 2x = 11 - 5, 2x = 6. Then divide by 2: x = 6 / 2, x = 3. #### 3
A restaurant sells 12 burgers at $4 each. What is the total amount earned by the restaurant?	Multiply 12 by 4: 12 * 4 = 48. #### 48
If Sally is able to type 30 words per minute, and she has to type 1200 words for her essay, how many minutes will it take her to finish the essay?	To get the total number of minutes needed, divide the total number of words by the number of words typed per minute. So 1200 / 30 = 40 minutes. #### 40
A snail is at the bottom of a 20-foot well. Each day, it climbs up 3 feet, but at night, it slips back 2 feet. How many days will it take for the snail to reach the top of the well?	To find the percentage, divide the number of blue buttons by the total number of buttons, and then multiply by 100. So (15 / 35) * 100 = 42.86%. #### 43
John has 35 buttons in a bag, out of which 15 are blue. What percentage of the buttons in the bag are blue?	The milk truck travels 240 miles to the city, and then 240 miles back, so the total distance traveled is 240 + 240 = 480 miles. #### 480
A milk truck travels from the dairy farm to the city, which is 240 miles away, in 4 hours. If it returns immediately, how many miles did the milk truck travel in total?	The class initially has 15 boys, and 5 more join, so the new number of boys is 15 + 5 = 20. The new total number of students is 25 + 5 = 30. Now, find the percentage of boys: (20 / 30) * 100 = 66.67%. #### 67
Out of 25 students, 15 are boys. If 5 more boys join the class, what is the new percentage of boys in the class?	" and end by the
If Sue has 150 pounds of flour to bake cookies, and she needs 10 pounds of flour for each batch, how many batches can she make?	Sue can make 150 / 10 = 15 batches. #### 15
A box contains 10 yellow and 5 green marbles. What is the probability of drawing two yellow marbles?	The probability of drawing a yellow marble on the first draw is 10 / 15. The probability of drawing a yellow marble on the second draw, assuming a yellow marble was drawn on the first draw, is 9 / 14. The probability of drawing two yellow marbles is 10 / 15 * 9 / 14 = 9 / 21. #### 9/21
In a group of 80 people, 45 are men, and the rest are women. How many women are in the group?	The number of women is 80 - 45 = 35. #### 35
From a set of 12 books, 5 are fiction, 3 are biographies, and the rest are non-fiction. How many non-fiction books are in the set?	The number of non-fiction books is 12 - 5 - 3 = 4. #### 4
A set of exam scores have a mean of 75 and a standard deviation of 5. What score is 2 standard deviations above the mean?	The score 2 standard deviations above the mean is 75 + 2 * 5 = 85. #### 85
A car travels from city X to city Y at an average speed of 50 km/h and returns at an average speed of 30 km/h. What is the average speed of the car for the entire trip?	Let's say the distance between city X and city Y is d km. Time taken to travel from city X to city Y = d / 50 hours. Time taken to travel from city Y to city X = d / 30 hours. Total time taken = (d / 50) + (d / 30) = (3d / 150) + (5d / 150) = (8d / 150) hours. Total distance travelled = 2d km. Average speed for the entire trip = 2d / (8d / 150) = 150 / 4 = 37.5 km/h. #### 37.5
Tom has 24 pencils. He gives 4 to his brother and buys 12 more. How many pencils does Tom have now?	Tom has 24 pencils initially. He gives 4 to his brother, so he has 24 - 4 = 20 pencils. He buys 12 more pencils, so he has 20 + 12 = 32 pencils now. #### 32
A library has 450 books on its shelves. If 150 more books are added, what is the total number of books on the shelves?	There are 450 books initially. 150 more books are added, so the total number of books becomes 450 + 150 = 600. #### 600
A company sells a total of 540 chairs and tables on a certain day. If the number of chairs sold is 180 more than the number of tables sold, how many tables were sold that day?	Let the number of tables sold be t. Number of chairs sold = t + 180. Total number of chairs and tables sold = 540. So, t + (t + 180) = 540. 2t + 180 = 540. 2t = 540 - 180 = 360. t = 360 / 2 = 180. #### 180
A rectangular garden has an area of 480 square meters. If the length of the garden is 24 meters, what is its width?	Area of the garden = length × width = 480 square meters. Length = 24 meters. So, width = 480 / 24 = 20 meters. #### 20
From a basket containing 8 yellow apples, 5 red apples, and 7 green apples, what is the probability of selecting a yellow apple or a green apple?	First, count the total number of apples: 8 + 5 + 7 = 20 apples. Then, count the total number of yellow and green apples: 8 + 7 = 15 apples. Finally, divide the number of yellow and green apples by the total number of apples to get the probability: 15/20 = 0.75. #### 0.75
A toy company produces 480 toy cars per hour. If they pack 12 toy cars in each box, how many boxes do they need?	Divide the total number of toy cars by the number of toy cars in each box: 480 ÷ 12 = 40 boxes. #### 40
A right triangular prism has a height of 8 cm, a length of 10 cm, and a width of 5 cm. What is its volume?	Find the area of the triangular base: 0.5 * 10 * 5 = 25 cm^2. Then, multiply the area by the height: 25 * 8 = 200 cm^3. #### 200
John, Emma, and Liam are saving money for a trip. John saved $120, Emma saved $80, and Liam saved $150. What is the total amount of money they saved?	Add the amounts saved by each person: 120 + 80 + 150 = 350. #### 350
A shirt is on sale for 20 percent off its original price of 180. How much will you pay for the shirt?	Calculate the discount: 20% of 180 = 0.2 * 180 = 36. Then, subtract the discount from the original price: 180 - 36 = 144. #### 144
A bakery sells 240 loaves of bread per day. If they sell each loaf for $2 and produce them at a cost of $0.75, how much profit does the bakery make per day?	First, calculate the total revenue by multiplying the number of loaves sold by the price per loaf: 240 * 2 = 480. Next, calculate the total cost by multiplying the number of loaves produced by the cost per loaf: 240 * 0.75 = 180. Then, subtract the total cost from the total revenue to find the profit: 480 - 180 = 300. #### 300
A bicycle is on sale for 15% off its original price of $120. How much will you pay for the bicycle?	First, calculate the discount amount by multiplying the original price by the discount percentage: 120 * 0.15 = 18. Then, subtract the discount amount from the original price to find the sale price: 120 - 18 = 102. #### 102
A rectangular garden measures 15 meters by 8 meters. If a path that is 2 meters wide is built around the garden, what is the area of the path?	First, calculate the area of the garden: 15 * 8 = 120. Next, calculate the dimensions of the garden with the path: 15 + 2 + 2 = 19 and 8 + 2 + 2 = 12. Then, calculate the area of the garden with the path: 19 * 12 = 228. Finally, subtract the area of the garden from the area of the garden with the path to find the area of the path: 228 - 120 = 108. #### 108
A group of friends want to share some candy equally. If they have 48 pieces of candy and there are 8 friends, how many pieces of candy will each friend get?	Divide the total number of pieces of candy by the number of friends: 48 ÷ 8 = 6. #### 6
A factory produces 500 units of a product per day. If the factory operates for 20 days, how many units of the product will it produce in total?	Multiply the number of units produced per day by the number of days the factory operates: 500 * 20 = 10000. #### 10000
Sophia has 24 books to pack into boxes of 4 books each. How many boxes of books can Sophia make?	Sophia can make boxes of books by dividing the total number of books by the number of books per box. 24 ÷ 4 = 6. #### 6
A group of students want to share some pencils equally. If they have 120 pencils and there are 10 students, how many pencils will each student get?	Each student will get pencils by dividing the total number of pencils by the number of students. 120 ÷ 10 = 12. #### 12
In a triangle XYZ, the measure of angle Z is 45 degrees. If the side opposite to angle Z is 12 cm, what is the length of the altitude of the triangle?	The length of the altitude can be found using trigonometry. The altitude is the side opposite to angle Z divided by the sine of angle Z. The sine of 45 degrees is √2/2. Altitude = 12 / (√2/2) = 12√2. #### 12√2
What is the median of the set {2,4,6,8,10,12}?	To find the median, first arrange the numbers in order: {2,4,6,8,10,12}. Since there are an even number of numbers, the median is the average of the two middle numbers. The median is (6 + 8) / 2 = 7. #### 7
A group of friends want to know the probability of rolling an even number on a six-sided fair die. What is the probability?	There are 3 even numbers (2, 4, 6) out of a total of 6 possible outcomes. The probability is the number of favorable outcomes divided by the total number of outcomes. Probability = 3/6 = 1/2. #### 1/2
A pyramid has a height of 12 cm and a square base with a side length of 4 cm. What is the volume of the pyramid?	The formula for the volume of a pyramid is V = (1/3)Bh. The area of the square base B = s^2 = 4^2 = 16. The volume is V = (1/3)16*12 = 64. #### 64
A bookshelf has 5 shelves, and each shelf can hold 8 boxes. If the bookshelf is currently empty, how many boxes can be placed on it in total?	There are 5 shelves, each holding 8 boxes. So, the total capacity is 5*8 = 40 boxes. #### 40
A bakery is selling a batch of 240 cookies. They want to package them in sets of 12. How many sets can they make?	To find the number of sets, divide the total number of cookies by the number of cookies in each set: 240 / 12 = 20. #### 20
The exterior angles of a polygon add up to 360 degrees. If the polygon has 6 sides, what is the measure of each exterior angle?	The sum of exterior angles is 360 degrees. Divide this by the number of sides to find the measure of each exterior angle: 360 / 6 = 60. #### 60
A student scored 84, 76, and 90 on three math tests. What is the probability that the student will score above 80 on the next test?	There are 3 tests with scores above 80: 84 and 90. The probability is the number of successful outcomes divided by the total number of tests: 2/3 = 0.67. #### 0.67
Emil has 3 more pencils than his 12 pens. If Emil gives 4 pencils to his brother, what is the difference between the number of pencils and pens Emil has now?	Emil has 12 pens. He has 3 more pencils than pens, so he has 12 + 3 = 15 pencils. After giving 4 pencils to his brother, he has 15 - 4 = 11 pencils. The difference is 11 - 12 = -1. #### -1
A farmer has 300 chickens, 200 ducks, and 150 geese on his farm. If 25% of the chickens, 30% of the ducks, and 20% of the geese are sold, how many birds are left on the farm?	There are 300 chickens. 25% of 300 is .25 * 300 = 75. So, there are 300 - 75 = 225 chickens left. There are 200 ducks. 30% of 200 is .30 * 200 = 60. So, there are 200 - 60 = 140 ducks left. There are 150 geese. 20% of 150 is .20 * 150 = 30. So, there are 150 - 30 = 120 geese left. The total number of birds is 225 + 140 + 120 = 485. #### 485
Tom can fix a bike in 9 hours, while his friend can do it in 12 hours. If they work together, how long will it take for them to fix the bike?	Tom's rate is 1/9 bikes per hour. His friend's rate is 1/12 bikes per hour. If they work together, their rate is 1/9 + 1/12 = (4+3)/36 = 7/36 bikes per hour. So, they can fix a bike in 36/7 hours. 36/7 is approximately 5.14 hours. #### 5
A rectangle has a length of 10 cm and a width of 6 cm. What is the length of its diagonal?	The diagonal forms a right triangle with the length and width. So, we can use the Pythagorean theorem. The diagonal squared is 10 squared + 6 squared = 100 + 36 = 136. The diagonal is the square root of 136. The square root of 136 is approximately 11.66 cm. #### 12
A toy store sells 50 toys at $20 each. What is the total amount of money the toy store earns?	The total amount of money is 50 * $20 = $1000. #### 1000
Mark has 90 pounds of apples. He distributes them equally among 15 baskets. How many pounds of apples are there in each basket?	90 pounds ÷ 15 = 6 pounds. #### 6
What is the total cost of 5 identical calculators, each priced at $8.50 and a tax rate of 10%?	First, calculate the total cost of calculators without tax: 5 x $8.50 = $42.50. Then calculate 10% of the cost: $42.50 x 10% = $4.25. Total cost = $42.50 + $4.25 = $46.75. #### 46.75
Tom and Alex are standing at opposite ends of a swimming pool. Tom is at point A and Alex is at point B. If Tom swims 12 meters towards Alex and then Alex swims 8 meters towards Tom, what is the distance between them?	Tom swims 12 meters towards Alex, so the distance between them reduces by 12 meters. Then Alex swims 8 meters towards Tom, so the distance reduces by another 8 meters. Therefore, the new distance is the original distance - (12 + 8) = the original distance - 20 meters. #### (the original distance - 20)
Emily has 24 cookies to share with her friends. If she gives 2 cookies to each of her 4 friends, how many cookies are left with her?	Emily gives 2 cookies to each of her 4 friends, so she gives away a total of 2 x 4 = 8 cookies. The number of cookies left with her = 24 - 8 = 16. #### 16
What is the measure of angle C in the figure, if angle A = 70 degrees and angle B = 30 degrees?	The three angles in the figure are angle A, angle B and angle C. Since the sum of the angles in a triangle is 180 degrees, angle C = 180 - (angle A + angle B) = 180 - (70 + 30) = 180 - 100 = 80 degrees. #### 80
What is the value of x in the equation 2x + 9 = 11?	To solve for x, subtract 9 from both sides of the equation to get 2x = 11 - 9, then divide both sides by 2 to get x = 2/2 = 1 #### 1
A water tank can hold 480 gallons of water. If 120 gallons of water are already in the tank, how many more gallons can be added?	To find the number of gallons that can be added, subtract the amount already in the tank from the total capacity: 480 - 120 = 360 #### 360
A bakery sells 250 loaves of bread per day. If each loaf costs $2.50, how much money does the bakery make in a day?	Multiply the number of loaves sold by the cost per loaf: 250 x $2.50 = $625 #### 625
In a class of 30 students, 12 are boys and the rest are girls. What is the probability that a randomly selected student is a girl?	There are 30 students in total, and 30 - 12 = 18 are girls. The probability is the number of girls divided by the total number of students: 18/30 = 3/5 = 0.6 #### 0.6
A rectangular garden measures 15 meters by 8 meters. If a path that is 2 meters wide is built around the garden, what is the area of the path?	First, find the area of the larger rectangle that includes the path: (15 + 2*2) x (8 + 2*2) = 19 x 12 = 228. Then, subtract the area of the garden: 228 - 15*8 = 228 - 120 = 108 #### 108
A store has a ratio of 2:3 for the number of shirts to pants. If there are 48 pants in the store, how many shirts are there?	Let the number of shirts be 2x and the number of pants be 3x. Then, 3x = 48. Dividing both sides by 3, x = 16. So, the number of shirts is 2x = 2 * 16 = 32. #### 32
A snail is at the bottom of a 20-foot well. Each day, it climbs up 3 feet, but at night, it slips back 2 feet. How many days will it take for the snail to reach the top of the well?	The snail climbs 3 feet and slips back 2 feet, so it climbs 1 foot per day. The snail needs to climb 20 feet. 20 / 1 = 20 days. So, it will take the snail 20 days to reach the top of the well. #### 20
In a factory, machines A and B produce 100 and 50 items per hour, respectively. If machine A operates for 5 hours and machine B operates for 8 hours, how many items do they produce in total?	Machine A produces 100 * 5 = 500 items. Machine B produces 50 * 8 = 400 items. In total, they produce 500 + 400 = 900 items. #### 900
A bakery sells 1200 loaves of bread per week. If they operate 52 weeks a year, how many loaves of bread do they sell annually?	1200 loaves of bread per week * 52 weeks per year = 62400 loaves of bread per year. #### 62400
A bicycle and a helmet together cost $90. The bicycle costs $80 more than the helmet. How much does the helmet cost?	Let the cost of the helmet be x. The bicycle costs $80 more than the helmet, so the bicycle costs x + 80. The total cost is x + (x + 80) = 90. Simplifying, 2x + 80 = 90. Subtracting 80 from both sides, 2x = 10. Dividing both sides by 2, x = 5. #### 5
A factory has 12 machines, and each machine can produce 15 toys per hour. How many toys can the factory produce in one hour?	To find the total number of toys produced, we multiply the number of machines by the number of toys each machine can produce. 12 x 15 = 180. #### 180
A bakery has 30 cakes, and each cake has 24 slices. If 36 slices are eaten, how many slices are left?	First, we find the total number of slices by multiplying the number of cakes by the number of slices per cake. 30 x 24 = 720. Then, we subtract the number of slices eaten from the total number of slices. 720 - 36 = 684. #### 684
A triangle has sides of 9 cm, 12 cm, and 15 cm. What is the perimeter of the triangle?	The perimeter is the sum of all the sides of the triangle. 9 + 12 + 15 = 36. #### 36
A library has 50 books, and 20% of them are fiction. How many fiction books does the library have?	To find 20% of 50, we multiply 50 by 0.2. 50 x 0.2 = 10. #### 10
A garden has 18 rows of flowers, with 20 flowers in each row. If 12 rows are removed, how many flowers are left?	First, we find the total number of flowers by multiplying the number of rows by the number of flowers per row. 18 x 20 = 360. Then, we subtract the number of rows removed multiplied by the number of flowers per row from the total number of flowers. 360 - (12 x 20) = 360 - 240 = 120. #### 120
John has 2 times as many books as Alex. Alex has 7 books. How many books does John have?	John has 2 times as many books as Alex. Alex has 7 books. So, John has 2 x 7 books. 2 x 7 = 14 #### 14
A pair of shoes is on sale for 20% off its original price of $120. How much will the shoes cost during the sale?	First, we calculate 20% off the original price, so that is 0.2 x 120 = 24. Now subtract 24 from the original price, so 120 - 24 = 96. #### 96
A bookstore sells 180 books at $10 each. The total cost of producing the books is $1200. How much profit does the bookstore make?	First, we calculate the revenue, so 180 x 10 = 1800. Next, subtract the cost from the revenue, so 1800 - 1200 = 600. #### 600
A rectangular pool measures 30 meters by 20 meters. If a deck of width 3 meters is built around it, what is the area of the deck?	First, we calculate the area of the pool, so 30 x 20 = 600. Then, calculate the area of the outside rectangle, so (30 + 2 x 3) x (20 + 2 x 3) = 36 x 26 = 936. Now, subtract the area of the pool from the outside area, so 936 - 600 = 336. #### 336
Tim has 45 basketballs in the store originally. He ordered 17 more to be delivered at the end of the day. How many basketballs will he have in the store at the end of the day?	Just add the number of basketballs originally and the number of basketballs delivered, so 45 + 17 = 62. #### 62
How many diagonals does a polygon with 15 sides have?	A polygon with n sides has n*(n-3)/2 diagonals. Therefore, a polygon with 15 sides has 15*(15-3)/2 = 15*12/2 = 15*6 = 90. #### 90
A library has a total of 525 books on two shelves. If the number of books on the first shelf is 275, how many books are on the second shelf?	Let's subtract the number of books on the first shelf from the total number of books. 525 - 275 = 250. #### 250
Leila deposited 800 dollars into her account. She withdrew 1/4 of the total amount in her account. What fraction of her original balance did she withdraw?	Leila withdrew 1/4 = 0.25 of her original balance. #### 0.25
A cube has a side length of 9 cm. What is the surface area of the cube?	The surface area of a cube is 6*s^2, where s is the side length. 6*9^2 = 6*81 = 486. #### 486
A jar contains 7 yellow balls, 9 black balls, and 4 white balls. What is the probability that a randomly selected ball is not black?	The total number of balls is 7 + 9 + 4 = 20. The number of non-black balls is 7 + 4 = 11. The probability is 11/20 = 0.55. #### 0.55
A company has 15 computers, and each computer needs 8 hours of maintenance every month. If a technician can do the maintenance for 3 computers in one day, how many days will it take to do the maintenance for all the computers?	Let's break this problem down step by step. First, we need to find the total hours of maintenance required for all the computers, which is 15 computers x 8 hours/computer = 120 hours. Since the technician can do the maintenance for 3 computers in one day, the technician can do 3 computers x 8 hours/computer = 24 hours of maintenance in one day. Now, we need to find how many days it will take to d…
A garden has 12 rows of flowers, and each row has 20 flowers. If 25% of the flowers are red, how many red flowers are there in the garden?	Let's break this problem down step by step. First, we need to find the total number of flowers in the garden, which is 12 rows x 20 flowers/row = 240 flowers. Since 25% of the flowers are red, we multiply the total number of flowers by 0.25 to get the number of red flowers, which is 240 flowers x 0.25 = 60 flowers. #### 60
What is the length of the hypotenuse of a right triangle with legs of length 5 and 12?	To find the length of the hypotenuse, we use the Pythagorean theorem, which is a^2 + b^2 = c^2, where a and b are the lengths of the legs, and c is the length of the hypotenuse. Plugging in the values, we get 5^2 + 12^2 = c^2, which is 25 + 144 = c^2. Simplifying, we get 169 = c^2. Taking the square root of both sides, we get c = sqrt(169) = 13. #### 13
A bakery sells 250 loaves of bread per day, and each loaf costs $2. If they want to make a profit of 20% per loaf, how much should they charge per loaf?	Let's break this problem down step by step. First, we need to find the selling price of each loaf, which is the cost per loaf plus the profit per loaf. The cost per loaf is $2. The profit per loaf is 20% of $2, which is 0.20 x $2 = $0.40. So, the selling price per loaf is $2 + $0.40 = $2.40. #### 2.4
In a set of 40 students, 28 speak Spanish, 22 speak English, and 10 speak both languages. What is the probability that a student speaks English?	To find the probability, we need to find the number of students who speak English and divide it by the total number of students. The number of students who speak English is 22 + 10 = 32, since 10 students speak both languages. The total number of students is 40. So, the probability is 32/40 = 0.8. #### 0.8
A bookshelf has 18 books on it. If 6 books are removed, and then an equal number of books are added, how many books will the bookshelf have in total?	The bookshelf originally had 18 books. If 6 books are removed, there will be 18 - 6 = 12 books. If an equal number of books are added, that is 6 more, so the total number of books will be 12 + 6 = 18. #### 18
In a right triangle, the length of the hypotenuse is 8 inches. If one angle is 45 degrees, what is the length of the side opposite the 45 degree angle?	Since it's a right triangle, we can use the Pythagorean theorem. Let x be the side opposite the 45 degree angle. Since it's 45 degrees, the other angle will also be 45 degrees. So, x^2 + x^2 = 8^2. Simplifying, 2x^2 = 64, so x^2 = 64/2 = 32. x = sqrt(32) = 4 * sqrt(2) = 4 * 1.414 = 5.657. #### 5.657
In a deck of 20 cards, 8 are hearts, 6 are diamonds, and the rest are clubs. What is the probability of randomly selecting a club card?	The probability of selecting a club card is the number of club cards divided by the total number of cards. There are 20 cards in total, and 8 are hearts, 6 are diamonds, so the remaining number of cards are 20 - 8 - 6 = 6 cards, which are clubs. The probability is 6/20 = 3/10 = 0.3. #### 0.3
The length of a rectangle is 4 inches longer than its width. If the perimeter of the rectangle is 40 inches, what are the dimensions of the rectangle?	Let x be the width of the rectangle. The length is x + 4. The perimeter is 2x + 2(x + 4) = 40. Simplifying, 2x + 2x + 8 = 40, so 4x + 8 = 40. Subtracting 8 from both sides, 4x = 32, so x = 8. The width is 8 inches, and the length is 8 + 4 = 12 inches. #### 8, 12
A car travels from city A to city B at 80 km/h and returns at 60 km/h. What is the average speed for the round trip?	The average speed is the total distance divided by the total time. Let the distance be x. The total distance is 2x. The time taken to travel from A to B is x/80, and the time taken to return is x/60. The total time is x/80 + x/60 = (3x + 4x)/240 = 7x/240. The average speed is 2x / (7x/240) = 480/7. #### 68.571
A company has 7 departments, and each department has 8 teams. If each team has 4 employees, how many employees are there in the company?	There are a total of 7 departments. Each department has 8 teams, so there are 7 * 8 = 56 teams. Each team has 4 employees, so there are 56 * 4 = 224 employees in total. #### 224
If a car travels 350 kilometers in 5 hours, how many kilometers does it travel per hour?	If the car travels 350 kilometers in 5 hours, it travels 350 / 5 = 70 kilometers per hour. #### 70
A set of 10 pencils costs $5. If the profit on each pencil is 30% of the selling price, and the selling price of each pencil is $0.5, what is the total profit?	If the selling price of each pencil is $0.5, the profit on each pencil is 30% * 0.5 = 0.15 dollars. So, the total profit is 0.15 * 10 = 1.5 dollars. #### 1.5
What is the value of y if 5y - 2 = 18?	If 5y - 2 = 18, we can add 2 to both sides to get 5y = 20. Then, dividing both sides by 5 gives y = 20 / 5 = 4. #### 4
A school has 9 classes, and each class has 36 students. If 2/9 of the students are boys, how many boys are there in the school?	There are a total of 9 classes. Each class has 36 students, so there are 9 * 36 = 324 students in total. 2/9 of the students are boys, so there are 2/9 * 324 = 72 boys in total. #### 72
A box contains 7 red pens, 5 blue pens, and 3 green pens. What is the probability of randomly selecting a pen that is not red?	The total number of pens is 7 + 5 + 3 = 15. The number of non-red pens is 5 + 3 = 8. So, the probability is 8/15. #### 8/15
A bakery has 36 cookies to package in boxes of 6 cookies each. How many boxes can be filled?	The total number of cookies is 36. We need to find how many groups of 6 we can make from 36. 36 ÷ 6 = 6. #### 6
A cylinder has a radius of 3 cm and a height of 5 cm. What is the lateral surface area of the cylinder?	The lateral surface area of the cylinder is given by the formula 2πrh, where r is the radius and h is the height. So, the lateral surface area is 2 × π × 3 × 5 = 30π. #### 30π
If 5 machines can produce 20 toys in 3 hours, how many machines will it take to produce 30 toys in 1 hour?	First, we need to find the rate at which one machine produces toys. 5 machines produce 20 toys in 3 hours, so the rate of one machine is (20 ÷ 5) ÷ 3 = 4/3 toys per hour. Now, we need to find how many machines are needed to produce 30 toys in 1 hour. The rate of one machine is 4/3 toys per hour, so we need to find x such that x × 4/3 = 30. Solving for x, we get x = 30 × 3/4 = 45/4 = 22.5. Since w…
In a certain class, 40% of the students passed the exam. If there were 50 students in total, how many students failed the exam?	The number of students who passed the exam is 40% of 50, which is 0.4 × 50 = 20. So, the number of students who failed the exam is 50 - 20 = 30. #### 30
A rectangle has a length of 12 cm and a width of 8 cm. What is the length of its diagonal?	Pythagorean theorem can be used to find the diagonal. Diagonal² = length² + width². Diagonal² = 12² + 8². Diagonal² = 144 + 64. Diagonal² = 208. Diagonal = √208. Diagonal = 14.42. #### 14.42
A survey of 150 students found that 50 liked Football, 70 liked Basketball, and 20 liked both Football and Basketball. How many students liked Basketball but not Football?	First, find the number of students who liked Football or Basketball. 150 - 50 - 70 + 20 = 50 students liked neither. So, 150 - 50 = 100 students liked Football or Basketball. Out of these 100 students, 20 liked both Football and Basketball. Hence, 100 - 20 = 80 students liked either Football or Basketball. Finally, 80 - 50 = 30 students liked Basketball but not Football. #### 30
A triangle has angles of 30 degrees, 75 degrees, and x degrees. What is the value of x?	The sum of the angles of a triangle is 180 degrees. 30 + 75 + x = 180. 105 + x = 180. x = 180 - 105. x = 75. #### 75
How many integers between 1 and 200 are divisible by 5?	To find the number of multiples of 5 between 1 and 200, divide 200 by 5. 200 ÷ 5 = 40. However, we should exclude 200, so subtract 1. 40 - 1 = 39. The first multiple of 5 is 5, so we do not exclude 5. #### 39
A cyclist travels from Town A to Town B at an average speed of 30 km/h and returns at an average speed of 20 km/h. What is the average speed of the cyclist for the entire trip?	First, find the total distance. Let the distance be d km. The time taken for the first trip is d / 30 hours. The time taken for the second trip is d / 20 hours. The total time taken is d / 30 + d / 20 hours. Now, find the total distance traveled. The total distance is 2d km. The average speed is the total distance divided by the total time. Average speed = 2d / (d / 30 + d / 20) km/h. Use the com…
In a class of 35 students, 20 students like music, 15 students like dance, and 5 students like both music and dance. How many students do not like either music or dance?	Total number of students = 35. Number of students who like music or dance or both = 20 + 15 - 5 = 30. Number of students who do not like either = 35 - 30 = 5 #### 5
David, Mark and Sarah are planting trees. David plants 15 trees per hour, Mark plants 20 trees per hour, and Sarah plants 25 trees per hour. If they work together for 4 hours, how many trees do they plant?	Number of trees planted by David in 4 hours = 15 * 4 = 60. Number of trees planted by Mark in 4 hours = 20 * 4 = 80. Number of trees planted by Sarah in 4 hours = 25 * 4 = 100. Total number of trees planted = 60 + 80 + 100 = 240 #### 240
A shoe store has a sale of 20% off on all shoes. If a pair of shoes is originally priced at 120 dollars, how much will it cost after the sale?	Amount of discount = 20% of 120 = 0.2 * 120 = 24. Price of the shoes after the sale = 120 - 24 = 96 #### 96
Olivia has 18 pencils and she gives 6 to her sister. If she wants to put the remaining pencils in boxes of 3 each, how many boxes can Olivia make?	Number of pencils remaining = 18 - 6 = 12. Number of boxes = 12 / 3 = 4 #### 4
What is the standard deviation of the dataset 1, 3, 5, 7, 9?	First, find the mean of the dataset. Mean = (1 + 3 + 5 + 7 + 9) / 5 = 25 / 5 = 5. Variance = ((1-5)^2 + (3-5)^2 + (5-5)^2 + (7-5)^2 + (9-5)^2) / 5 = (16 + 4 + 0 + 4 + 16) / 5 = 40 / 5 = 8. Standard deviation = sqrt(8) = 2.828 #### 2.828
A company sells 1500 boxes of cereal per month. If they sell 300 more boxes of oatmeal cereal than cornflakes cereal, and each box of oatmeal cereal costs $5, how much money did the company make in a month if each box of cornflakes cereal costs $2?	First, we will find the total number of oatmeal cereal boxes sold by adding 300 to the number of cornflakes cereal boxes sold. This gives us 1500 - 300 = 1200 cornflakes cereal boxes and 1200 + 300 = 1500 oatmeal cereal boxes. Then, we will multiply the number of each type of cereal box sold by its corresponding price and add the results together. This gives us 1200 * $2 + 1500 * $5 = $2400 + $75…
A restaurant has 8 tables. If 5 of the tables are occupied, what is the probability that a randomly selected table is occupied?	There are 8 tables in total and 5 are occupied. So, the probability of a table being occupied is 5/8. #### 5/8
May has 24 blue pencils and she gives 6 to her sister. How many blue pencils does May have left?	To find the number of blue pencils left, we will subtract the number of pencils given away from the total number of pencils. This gives us 24 - 6 = 18. #### 18
A car travels 250 miles in 5 hours. If it maintains the same speed, how many miles will it travel in 7 hours?	First, we will find the speed of the car by dividing the distance traveled by the time taken. This gives us 250 / 5 = 50 miles per hour. Then, we will multiply the speed by the time to find the distance traveled in 7 hours. This gives us 50 * 7 = 350. #### 350
A rectangle has a perimeter of 40 inches. If the length is 5 inches more than the width, what is the length of the rectangle?	Let's assume the width of the rectangle is x inches. Then, the length is x + 5 inches. The perimeter is the sum of the lengths of all sides, which gives us 2(x) + 2(x + 5) = 40. Combining like terms and solving for x, we get x + x + 10 = 40, 2x + 10 = 40, 2x = 30, and x = 15. The length is 15 + 5 = 20 inches. #### 20
The average of 7 numbers is 35. If the average of 4 of the numbers is 40, what is the average of the remaining 3 numbers?	Let the sum of the 4 numbers be 4 * 40 = 160. The sum of the 7 numbers is 7 * 35 = 245. So, the sum of the remaining 3 numbers is 245 - 160 = 85. The average of the remaining 3 numbers is 85 / 3 = 28.33 ####28.33
A car travels at a speed of 60 km/h for 2 hours and then travels at a speed of 40 km/h for 1 hour. What is the average speed of the car for the entire journey?	The distance traveled in the first 2 hours is 60 * 2 = 120 km. The distance traveled in the last 1 hour is 40 * 1 = 40 km. The total distance traveled is 120 + 40 = 160 km. The total time taken is 2 + 1 = 3 hours. The average speed of the car is 160 / 3 = 53.33 ####53.33
A farmer has 24 meters of fencing and wants to enclose a rectangular area. If the length is 4 meters longer than the width, what are the dimensions of the rectangular area?	Let the width be x meters. Then, the length is x + 4 meters. The perimeter of the rectangular area is 24 meters. So, 2(x) + 2(x + 4) = 24. Simplifying the equation, we get x = 4. So, the width is 4 meters and the length is 4 + 4 = 8 meters. ####4, 8
A vendor sells 240 bottles of juice at $3 each. How much money does the vendor earn in total?	The total amount earned by the vendor is 240 * 3 = 720. ####720
A student has 36 pencils in her pencil case. She gives 12 pencils to her friend and buys 8 more pencils. How many pencils does the student have now?	The student had 36 pencils initially. After giving 12 pencils to her friend, she had 36 - 12 = 24 pencils. After buying 8 more pencils, she had 24 + 8 = 32 pencils. ####32
A teacher has 18 blue pens and 12 black pens in her desk. If she arranges them in rows of 3, how many rows can she make?	To find the number of rows, we need to find the greatest common divisor (GCD) of 18 and 12, which is 3. Since there are 30 pens in total and each row has 3 pens, the number of rows can be calculated by dividing 30 by 3, which gives 10. #### 10
In a triangle, the ratio of the lengths of the two sides is 3:4. If the longer side is 24 cm, what is the length of the shorter side?	Let the length of the shorter side be 3x cm. Then, the length of the longer side is 4x cm. Since the longer side is 24 cm, we can set up the equation 4x = 24. Solving for x, we get x = 6. The length of the shorter side is 3x = 3(6) = 18 cm. #### 18
A store sells 12 kg of apples at $15 per kg. What is the total amount of money the store earns?	The total amount of money the store earns is the product of the weight of apples and the price per kg, which is 12 kg * $15/kg = $180. #### 180
In a survey of 80 students, 28 liked playing soccer, 32 liked playing basketball, and 10 liked playing both soccer and basketball. How many students liked playing soccer but not basketball?	The number of students who liked playing soccer but not basketball is the difference between the number of students who liked playing soccer and the number of students who liked playing both soccer and basketball, which is 28 - 10 = 18. #### 18
The perimeter of a rectangle is 40 cm. If the length is 10 cm more than the width, what is the width of the rectangle?	Let the width of the rectangle be x cm. Then, the length is x + 10 cm. The perimeter of the rectangle is the sum of the lengths of all its sides, which is 2(l + w) = 2(x + 10 + x) = 2(2x + 10) = 4x + 20. Since the perimeter is 40 cm, we can set up the equation 4x + 20 = 40. Solving for x, we get x = 5. The width of the rectangle is 5 cm. #### 5
A bookshelf has 12 shelves and each shelf can hold 8 books. If the bookshelf is currently empty, how many books can be placed on it in total?	To find the total number of books that can be placed on the bookshelf, multiply the number of shelves by the number of books each shelf can hold. This gives 12 * 8 = 96 books. #### 96
A doctor has 18 bottles of pills, and each bottle contains 12 pills. How many pills does the doctor have in total?	To find the total number of pills, multiply the number of bottles by the number of pills each bottle contains. This gives 18 * 12 = 216 pills. #### 216
A car travels from City A to City B at an average speed of 60 kilometers per hour and returns at an average speed of 40 kilometers per hour. What is the average speed for the entire trip?	To find the average speed for the entire trip, we need to first find the total distance traveled, which is the same for the trip from City A to City B and the return trip. Let's call the distance d. The total time taken for the trip is the time from City A to City B plus the time from City B to City A. This gives (d / 60) + (d / 40) hours. To find the average speed, divide the total distance by t…
A factory produces 250 units of a product per hour. If the factory operates for 8 hours a day, how many units are produced in a day?	To find the total number of units produced in a day, multiply the number of units produced per hour by the number of hours the factory operates. This gives 250 * 8 = 2000 units. #### 2000
A rectangular swimming pool is 20 meters long and 10 meters wide. If a deck that is 2 meters wide is built around the pool, what is the area of the deck?	To find the area of the deck, first find the area of the larger rectangle formed by the deck. This is (20 + 2 + 2) * (10 + 2 + 2) = 24 * 14 = 336 square meters. Next, find the area of the smaller rectangle formed by the pool. This is 20 * 10 = 200 square meters. Finally, subtract the area of the pool from the area of the larger rectangle to get the area of the deck. This gives 336 - 200 = 136 squ…
The library has a total of 525 books on its shelves. If the number of fiction books is 225, how many non-fiction books are there?	Let's say x is the number of non-fiction books, then x + 225 = 525. Subtracting 225 from both sides, we get x = 525 - 225 = 300. #### 300
Emily is building a rectangular deck with a perimeter of 30 meters. If the length of the deck is 8 meters, what is the width of the deck?	We know that the perimeter of a rectangle is P = 2(l + w). Since P = 30, and l = 8, we have 30 = 2(8 + w). Simplifying this, we get 15 = 8 + w. Subtracting 8 from both sides, we get 7 = w. #### 7
Rachel deposited $4200 into a savings account earning an annual interest rate of 4%, compounded annually. How much was her investment worth after 3 years?	The future value of the investment after 3 years can be found by using the formula FV = PV(1 + r)^n, where PV is the principal value ($4200), r is the interest rate (4%), and n is the number of years (3). Plugging in the values, we get FV = 4200(1 + 0.04)^3. Evaluating this, we get FV = 4938.72. #### 4938
A group of 4 students - Jack, Kate, Lily, and Mike - are standing in a line. If Jack and Kate are standing next to each other, how many different arrangements are possible?	Since Jack and Kate are standing together, we can treat them as one unit. This leaves 3 units (the unit of Jack and Kate, Lily, and Mike). These 3 units can be arranged in 3! ways. Additionally, Jack and Kate can be rearranged within their unit in 2! ways. Therefore, the total number of arrangements is 3! * 2! = 12. #### 12
Olivia used 27 cups of sugar to bake 3 pies. How many cups of sugar did Olivia use to bake each pie?	If Olivia used 27 cups of sugar to bake 3 pies, we can find the number of cups used per pie by dividing 27 by 3. This gives us 27 / 3 = 9. #### 9
A ping-pong table has 6 rows, and each row has 4 paddles. How many paddles are there in total?	Total paddles = Number of rows x Number of paddles per row. Total paddles = 6 x 4 = 24. #### 24
A hair salon sells 300 hairspray bottles per week. If they operate 52 weeks a year, how many hairspray bottles do they sell annually?	Total hairspray bottles sold annually = Number of bottles sold per week x Number of weeks per year. Total hairspray bottles sold annually = 300 x 52 = 15600. #### 15600
Olivia has 12 baskets of apples in her orchard. Each basket contains 16 apples. How many apples does Olivia have in total?	Total apples = Number of baskets x Number of apples per basket. Total apples = 12 x 16 = 192. #### 192
A library has 4 floors, and each floor can hold 120 books. If the library is currently empty, how many books can it hold in total?	Total books = Number of floors x Number of books per floor. Total books = 4 x 120 = 480. #### 480
In a right triangle, the length of the hypotenuse is 7 and one of the legs is 5. What is the length of the other leg?	Using the Pythagorean theorem, a^2 + b^2 = c^2, where a and b are the legs and c is the hypotenuse. We know a = 5 and c = 7. So, b^2 = c^2 - a^2 = 7^2 - 5^2 = 24. b = sqrt(24) = 4.9. #### 4.9
The area of a triangle is 24 square feet. If the base of the triangle is 4 feet, what is the height?	Area of a triangle is given by 0.5*base*height. Here, area = 24 and base = 4. So, 24 = 0.5*4*height. Solving for height, we get height = 24/(0.5*4) = 12. #### 12
What is the equation of the circle with its center at the point (5, -2) and a radius of 7 units?	The equation of a circle is given by (x-h)^2 + (y-k)^2 = r^2, where (h, k) is the center of the circle, and r is the radius. Here, the center is (5, -2) and the radius is 7. So, the equation of the circle is (x-5)^2 + (y+2)^2 = 7^2. Simplifying, we get (x-5)^2 + (y+2)^2 = 49. #### 49
Sophia is planning a party at her house. She wants to fill 18 water bottles that can hold 1 liter each. If she already has 12 liters of water, how much more does she need?	Sophia has 18 bottles that can hold 1 liter each. So, she needs 18 liters. If she already has 12 liters, she needs 18 - 12 = 6 more liters. #### 6
A toy factory produces 100 toys per hour. If they make a profit of $2 per toy, how much profit do they make in 5 hours?	The factory makes 100 toys per hour. In 5 hours, they will make 100*5 = 500 toys. If they make a profit of $2 per toy, they will make 500*2 = $1000 in 5 hours. #### 1000
What is the surface area of a cube that has an edge length of 8 inches?	The surface area of a cube is given by 6*edge^2. Here, the edge length is 8. So, the surface area is 6*8^2 = 6*64 = 384. #### 384
A bookstore sold 300 books and 180 calendars in a day. If each book costs $5 and each calendar costs $2, how much money did the bookstore make in total?	First, find the total cost of books sold. 300 books x $5 each = $1500. Next, find the total cost of calendars sold. 180 calendars x $2 each = $360. Then, add the cost of books and calendars to find the total money made. $1500 + $360 = $1860. #### 1860
A convenience store sells a total of 500 energy drinks and juice boxes combined. If the number of energy drinks sold was 100 more than the number of juice boxes sold, and each energy drink costs $1.5, how much money did the store make from energy drinks if each juice box costs $1?	First, let's find the number of energy drinks sold. Let x be the number of juice boxes sold. Then, the number of energy drinks sold is x + 100. The total number of drinks sold is 500, so x + (x + 100) = 500. Solving for x, we get x = 200, which means there were 200 juice boxes sold and 300 energy drinks sold. Next, find the total cost of energy drinks sold. 300 drinks x $1.5 each = $450. #### 450
How many different ways are there to arrange the letters in the word CATS?	There are 4 letters in the word CATS, so there are 4! = 4 x 3 x 2 x 1 = 24 possible arrangements. #### 24
A toy store sold 350 toys and 250 board games in a week. If the store sells a combination of toy cars and dolls, and they sell 20 more toy cars than dolls, how many dolls were sold?	Let's find the total number of toys sold. The store sold 350 toys and 250 board games, so the total number of items sold is 350 + 250 = 600. The store sold 20 more toy cars than dolls, so let x be the number of dolls. Then, the number of toy cars is x + 20. The total number of toys is 350, so x + (x + 20) = 350. Solving for x, we get x = 165. #### 165
A bike shop sells 120 bicycles at $80 each and 50 accessories at $20 each. How much money did the bike shop make in total?	First, find the total cost of bicycles sold. 120 bicycles x $80 each = $9600. Next, find the total cost of accessories sold. 50 accessories x $20 each = $1000. Then, add the cost of bicycles and accessories to find the total money made. $9600 + $1000 = $10600. #### 10600
The area of a circle is 36π square meters. What is the radius of the circle?	The radius of the circle r can be found using the formula A = πr², where A is the area. 36π = πr². Divide both sides by π to get 36 = r². Take the square root of both sides to get 6 = r. #### 6
A total of 120 apples are packed into boxes containing 6 apples each. How many boxes are required?	Divide the total number of apples by the number of apples per box. 120 ÷ 6 = 20. #### 20
A book costs $15. If a 10% discount is available, how much will the customer pay?	First, calculate the discount. 10% of $15 is $1.5. The customer will pay the original price minus the discount. $15 - $1.5 = $13.5. #### 13.5
Two trains, Train A and Train B, are traveling in opposite directions. Train A travels at 90 km/h, and Train B travels at 80 km/h. If they cross each other in 10 seconds, what is the length of Train A if the length of Train B is 420 meters?	The distance between the two trains is equal to the sum of their lengths. The relative speed of the two trains is 90 km/h + 80 km/h = 170 km/h. Convert the relative speed to meters per second: 170 km/h = 47 m/s. The distance traveled by the two trains in 10 seconds is 47 m/s * 10 s = 470 meters. The length of Train A is 470 meters - 420 meters = 50 meters. #### 50
A factory produces 250 units of a product every hour. How many units will it produce in 5 hours and 30 minutes?	First, calculate the total number of minutes: 5 hours 30 minutes = 5 * 60 minutes + 30 minutes = 330 minutes. The factory produces 250 units per hour, so it produces 250 units / 60 minutes = 250 / 60 units per minute. In 330 minutes, it will produce (250 / 60) * 330 units = 1375 units. #### 1375
A bookstore sells 360 books per week. They display 9 stacks of books. How many books are in each stack?	Let's divide the total number of books by the number of stacks. 360 ÷ 9 = 40. #### 40
Rachel has $300 in her checking account. She deposits $50 every month for 2 months. How much money does Rachel have in her checking account now?	Let's add the deposited amount to the initial amount. $300 + ($50 * 2) = $300 + $100 = $400. #### 400
A swimming pool has a length of 15 meters, a width of 8 meters, and a depth of 3 meters. What is the volume of the swimming pool?	Let's multiply the length, width, and depth to get the volume. Volume = 15 * 8 * 3 = 360 cubic meters. #### 360
A quadrilateral has angles of 50, 70, 110, and x degrees. What is the value of x?	The sum of the interior angles of a quadrilateral is 360 degrees. Let's set up the equation: 50 + 70 + 110 + x = 360. Simplify the equation: 230 + x = 360. Subtract 230 from both sides: x = 360 - 230 = 130. #### 130
Alex has 24 boxes of toys to pack into crates of 4 boxes each. How many crates of toys can Alex make?	Let's divide the total number of boxes by the number of boxes per crate. 24 ÷ 4 = 6. #### 6
A student has 18 binders, and each binder can hold 12 folders. If the student is given 2 more binders, how many folders can be placed in them in total?	Let's first find the total number of binders the student has. 18 + 2 = 20. Now, let's find the total number of folders that can be placed. 20 x 12 = 240 #### 240
A car dealership has 12 cars, and each car has 4 wheels. How many wheels are there in total?	Let's find the total number of wheels. 12 x 4 = 48 #### 48
A basket contains 7 apples, 5 oranges, and 3 bananas. What is the probability of randomly selecting an orange?	Let's first find the total number of fruits. 7 + 5 + 3 = 15. Then, let's find the probability of selecting an orange. 5/15 = 1/3 #### 1/3
A company has 25 employees, and each employee is given 2 sets of stationery. How many sets of stationery are given in total?	Let's find the total number of sets of stationery. 25 x 2 = 50 #### 50
In a certain city, 25% of the population are adults. If there are 800 people in total, how many adults are there in the city?	Let's first convert the percentage to a decimal. 25% = 0.25. Then, let's find the number of adults. 0.25 x 800 = 200 #### 200
A library has five identical printers that can print 200 books each per hour. If the printers work for 4 hours, how many books can the library print?	There are 5 printers and each can print 200 books per hour. So, in 4 hours, each printer will print 4 x 200 = 800 books. There are 5 such printers, so the total number of books printed will be 5 x 800 = 4000. #### 4000
A store has a sale, offering 20 percent off on all products. If a product originally costs 150, how much will you pay for the product?	The product costs 150 originally and there is a discount of 20 percent. 20 percent of 150 is 150 x 0.2 = 30. So, the discount is 30. After discount, the price will be 150 - 30 = 120. #### 120
A company has 50 employees. Due to downsizing, 10 of them were let go. In a subsequent round of layoffs, 20 percent of the remaining employees were let go. How many employees are left?	The company initially had 50 employees. 10 were let go, so 50 - 10 = 40 employees are left. In the next round, 20 percent of 40 were let go. 20 percent of 40 is 40 x 0.2 = 8. So, 8 employees were let go. Now, there are 40 - 8 = 32 employees left. #### 32
A farmer has 72 bags of apples and wants to share them equally among 9 people. How many bags of apples will each person get?	The farmer has 72 bags of apples and wants to share them equally among 9 people. This means each person will get 72 / 9 = 8 bags of apples. #### 8
12 in base 8 is equal to what in base 10?	To convert a number from one base to another, we need to break down the number. In base 8, 12 is equal to 1 x 8 + 2 x 1 = 10. #### 10
The ratio of boys to girls in a class is 3:5. What is the number of girls if there are 18 boys?	Let the number of boys be 3x, and the number of girls be 5x. Since the number of boys is 18, we can set up the equation 3x = 18, which gives x = 6. Therefore, there are 5x = 5(6) = 30 girls. #### 30
The sum of three consecutive integers is 45. What is the middle integer?	Let the three consecutive integers be x, x + 1, and x + 2. The sum of these integers is x + (x + 1) + (x + 2) = 45, which simplifies to 3x + 3 = 45. Subtracting 3 from both sides and dividing by 3 gives x = 14. Therefore, the middle integer is x + 1 = 15. #### 15
A rectangular garden has a length of 15 meters and a width of 8 meters. If a path of uniform width 2 meters is laid around the garden, what is the area of the path?	The area of the garden is 15 x 8 = 120 square meters. The length and width of the garden including the path are 15 + 2 + 2 = 19 meters and 8 + 2 + 2 = 12 meters, respectively. Therefore, the area of the garden including the path is 19 x 12 = 228 square meters. The area of the path is the difference between these two areas, which is 228 - 120 = 108 square meters. #### 108
A snail is at the bottom of a 20-foot well. Each day, it climbs up 3 feet, but at night, it slips back 2 feet. How many days will it take for the snail to reach the top of the well?	The snail climbs 3 feet up during the day, but slips back 2 feet at night, which means it effectively climbs 3 - 2 = 1 foot per day. To reach the top of the 20-foot well, the snail needs to climb 20 feet, which will take 20 / 1 = 20 days. #### 20
A bakery sells 250 loaves of bread per day. If they make a profit of $0.50 on each loaf, what is their daily profit?	The daily profit is the product of the number of loaves sold and the profit per loaf, which is 250 x 0.50 = 125. #### 125
A bakery is making a special batch of cookies for the holiday season. If the bakery needs 3/4 cup of sugar for every 2 dozen cookies, how many cups of sugar are needed to make 12 dozen cookies?	Let's divide 12 by 2 to get the number of batches, which is 6. Since each batch requires 3/4 cup of sugar, the total sugar needed is 6 x 3/4 = 18/4 = 4 1/2 cups. #### 4.5
A factory produces 240 units of a product per hour. If the factory operates for 8 hours a day, how many units are produced in a day?	Multiply the number of units produced per hour by the number of hours operated. 240 units/hour x 8 hours = 1920 units. #### 1920
In a certain city, 3/5 of the population are males. If the city has a population of 15,000, how many females live in the city?	First, find the number of males by multiplying the total population by the fraction of males: 15,000 x 3/5 = 9,000. Then, subtract the number of males from the total population to get the number of females: 15,000 - 9,000 = 6,000. #### 6000
A rectangular garden measures 10 meters by 8 meters. If a path of uniform width is built around the garden, and the area of the path is 24 square meters, what is the width of the path?	Let the width of the path be x. The outer dimensions of the garden with the path are (10 + 2x) by (8 + 2x). The area of the path is the difference between the outer area and the inner area. Set up an equation: (10 + 2x)(8 + 2x) - 10*8 = 24. Expand and simplify the equation to get 16x + 4x^2 = 24. Divide by 4 to get 4x + x^2 = 6. Rearrange to get a quadratic equation: x^2 + 4x - 6 = 0. Factor the …
A car travels from city A to city B at an average speed of 60 km/h. On the return trip, the car travels at an average speed of 40 km/h. What is the average speed for the entire trip?	Let the distance between the two cities be x. The total time taken for the trip is the sum of the times taken for each leg: (x/60) + (x/40). Combine the fractions to get (2x + 3x)/120, which simplifies to 5x/120. The total distance is 2x, so the average speed is (2x)/(5x/120) = 48 km/h. #### 48
What is the slope of a line that passes through the points (2, 3) and (4, 6)?	To find the slope, we can use the formula: slope = (y2 - y1) / (x2 - x1). Plugging in the values, we get: slope = (6 - 3) / (4 - 2) = 3 / 2 = 1.5 #### 1.5
In a book club, the ratio of men to women is 2:7. If there are 126 members in the club, how many men are there?	We can set up a proportion: 2 / 7 = x / 126, where x represents the number of men. Cross-multiplying, we get: 2 * 126 = 7 * x. Solving for x, we get: x = 2 * 126 / 7 = 36 #### 36
At a bakery, 60% of the customers bought cakes. 30% of the 60% also bought cookies. If 120 customers bought cakes, how many customers bought both cakes and cookies?	We know that 60% of the customers bought cakes, which is 120. Since 30% of the 60% bought both cakes and cookies, we can set up the proportion: 30% / 60% = x / 120. Solving for x, we get: x = 30% * 120 / 60% = 60 / 100 * 120 / (60 / 100) = 60 / 100 * 120 = 72 / 2 = 36 #### 36
A bicycle travels from city A to city B at a speed of 20 km/h and returns at a speed of 15 km/h. What is the average speed of the bicycle for the entire trip?	To find the average speed, we need to know the total distance traveled. Let's assume the distance between city A and city B is x km. The total distance traveled is 2x km. The total time taken is the sum of the time taken in each direction: time = x / 20 + x / 15. Simplifying, we get: time = (3x + 4x) / 60 = 7x / 60. The average speed is the total distance divided by the total time: average speed …
A triangle has angles of 30°, 60°, and x. What is the value of x?	Since the sum of angles in a triangle is 180°, we can set up the equation: 30° + 60° + x = 180°. Solving for x, we get: x = 180° - 30° - 60° = 90° #### 90
A bookshelf has 5 shelves, and each shelf can hold 8 books. If the bookshelf is currently empty, how many books can be placed on it?	First, we identify the number of shelves and the number of books each shelf can hold. We have 5 shelves and 8 books per shelf. We can calculate the total number of books that can be placed by multiplying the number of shelves by the number of books per shelf. 5 * 8 = 40. #### 40
A bakery sells a total of 250 loaves of bread on Monday, Tuesday, and Wednesday. If 80 loaves were sold on Monday and 90 loaves were sold on Tuesday, how many loaves were sold on Wednesday?	First, we calculate the total number of loaves sold on Monday and Tuesday by adding 80 and 90. 80 + 90 = 170. We know that the total number of loaves sold on the three days is 250. We can find the number of loaves sold on Wednesday by subtracting 170 from 250. 250 - 170 = 80. #### 80
A rectangular garden measures 10 meters by 5 meters. If a path that is 1 meter wide is built around the garden, what is the area of the path?	First, we find the area of the garden. The area of a rectangle is length * width = 10 * 5 = 50. The area of the path would be equal to the area of the larger rectangle (10 + 1 + 1 meters by 5 + 1 + 1 meters) minus the area of the garden. The area of the larger rectangle is (12 * 7) = 84. The area of the path would be 84 - 50 = 34. #### 34
A person invests $3,000 at a 4% annual interest rate for 8 years. How much money will the person have at the end of the 8 years?	First, calculate the interest earned each year by multiplying the principal by the interest rate. $3,000 * 0.04 = $120. The interest earned each year is $120. Multiply by the number of years: $120 * 8 = $960. We know the principal amount was $3,000, so add the interest earned to the principal to find the total amount. $3,000 + $960 = $3,960. #### 3960
A plane travels from city A to city B at an average speed of 300 km/h and returns at an average speed of 200 km/h. What is the average speed of the plane for the entire trip?	First, we identify the average speeds for each direction. The average speed for the first leg is 300 km/h and the average speed for the second leg is 200 km/h. Since the plane travels the same distance in both legs, we can calculate the harmonic mean of the two speeds to find the average speed for the entire trip. Harmonic mean = (2 * 300 * 200) / (300 + 200) = 240. #### 240
A fitness center has 18 treadmills and 12 elliptical machines. If 8 new treadmills are added and 4 elliptical machines are removed, what is the total number of machines in the fitness center?	Let's first find the total number of machines initially: 18 + 12 = 30. Now, 8 new treadmills are added, so we have 30 + 8 = 38. After removing 4 elliptical machines, we have 38 - 4 = 34. #### 34
A library has 15 shelves and each shelf has 8 books. If 3 new shelves are added and each shelf has 10 books, what is the total number of books in the library?	Let's first find the total number of books initially: 15 * 8 = 120. Now, 3 new shelves are added, so there are 15 + 3 = 18 shelves. Each shelf has 10 books, so there are 18 * 10 = 180 books. #### 180
The average of 6 distinct integers is 7. What is the sum of the 6 integers?	If the average of 6 integers is 7, then their sum is 7 * 6 = 42. #### 42
A car travels 240 miles in 4 hours. If it travels at a constant speed, how many miles does it travel per hour?	Let's divide the total distance by the time to find the speed: 240 / 4 = 60. #### 60
A rectangular garden measures 10 meters by 6 meters. If a path that is 2 meters wide is built around the garden, what is the area of the path?	Let's first find the area of the garden: 10 * 6 = 60. The dimensions of the path are 10 + 2 + 2 = 14 meters and 6 + 2 + 2 = 10 meters. The area of the path is the difference between the area of the bigger rectangle and the garden: 14 * 10 - 60 = 100. #### 100
A bakery sells a total of 250 loaves of bread per day. They sell a combination of whole wheat and white bread. If they sell 30 more loaves of whole wheat than white bread, and they sell 110 loaves of whole wheat, how many loaves of white bread do they sell?	Let's say the number of loaves of white bread is x. The number of loaves of whole wheat is x + 30. We know that the total number of loaves is 250. So, x + (x + 30) = 250. 2x + 30 = 250. 2x = 220. x = 110. So, the bakery sells 110 loaves of white bread. ####110
If Sally can paint a house in 6 hours, and John can paint the same house in 4 hours, how long will it take for both of them to paint the house together?	Let's first find the rate at which Sally and John paint the house individually. Sally's rate is 1/6 of the house per hour. John's rate is 1/4 of the house per hour. When they work together, their combined rate is 1/6 + 1/4 = 5/12 of the house per hour. To find the time it takes for them to paint the house together, we divide 1 by their combined rate: 1 / (5/12) = 12/5 = 2.4 hours. ####2.4
A car travels from City A to City B at an average speed of 60 km/h and returns at an average speed of 40 km/h. What is the average speed for the entire trip?	Let's first find the time it takes to travel from City A to City B. Let the distance be x. Time = distance / speed. Time = x / 60. Now, let's find the time it takes to return. Time = x / 40. The total time is x / 60 + x / 40 = (2x + 3x) / 120 = 5x / 120 = x / 24. The total distance is 2x. The average speed is total distance / total time = 2x / (x / 24) = 48. ####48
In a certain school, the ratio of boys to girls is 3:5. If there are 120 boys, how many girls are there?	Let's use the ratio to set up an equation. Let the number of girls be x. The ratio of boys to girls is 3:5, so the number of boys is 3x/5. We know there are 120 boys, so 3x/5 = 120. Multiply both sides by 5 to get 3x = 600. Divide both sides by 3 to get x = 200. So, there are 200 girls. ####200
A rectangular swimming pool is 15 meters long and 8 meters wide. If the water is 2 meters deep, what is the volume of water in the pool?	The volume of water is the area of the pool multiplied by the depth. The area of the pool is length x width = 15 x 8 = 120 square meters. The volume is 120 x 2 = 240 cubic meters. ####240
Yara has 8 more pencils than her 20 markers. If Yara gives 3 markers to her brother, what is the difference between the number of pencils and markers Yara has now?	First, find the number of pencils Yara has. Yara has 8 more pencils than her 20 markers, so that means she has 20 + 8 = 28 pencils. After giving 3 markers to her brother, she has 20 - 3 = 17 markers. The difference between the number of pencils and markers is 28 - 17 = 11. #### 11
A swimming pool has 80 meters of fencing around the perimeter. If it is shaped like a rectangle with a width of 10 meters, what is its length?	Since it is a rectangle, we can use the formula P = 2l + 2w. P is the perimeter, l is the length and w is the width. The formula becomes 80 = 2l + 2(10). Simplifying the equation, we get 80 = 2l + 20 => 60 = 2l => 30 = l. So, the length is 30 meters. #### 30
There are 240 students in a school, including 60 seniors. What percentage of the students are seniors?	To find the percentage of seniors, divide the number of seniors by the total number of students, then multiply by 100. So, (60 / 240) * 100 = 25% => 25. #### 25
A can of oil has a volume of 3 liters. How many 1/4 liter bottles can be filled with this oil?	Divide the volume of the can by the volume of each bottle. 3 / (1/4) = 3 / 0.25 = 12. #### 12
Ten friends went to a concert and shared some candy equally. If they had 48 pieces of candy, how many pieces did each friend get?	Divide the total number of candies by the number of friends. 48 / 10 = 4.8. #### 4.8
A bakery is making a special batch of cookies for a holiday. They need to package 360 cookies into boxes that hold 12 cookies each. How many boxes will the bakery need?	To find the number of boxes, divide the total number of cookies by the number of cookies per box. 360 ÷ 12 = 30. The bakery will need 30 boxes. #### 30
What is the perimeter of a triangle with sides of length 5 cm, 7 cm, and 9 cm?	To find the perimeter, add the lengths of all three sides. 5 + 7 + 9 = 21. The perimeter of the triangle is 21. #### 21
Tom drives from city A to city B at 75 km/h and returns at 50 km/h. What is the average speed for the round trip?	First, find the total distance traveled, which is the same in both directions. Let's call it x. Then, find the total time taken. The time from A to B is x/75, and the time from B to A is x/50. The total time is x/75 + x/50. To add these fractions, find a common denominator, which is 150. Then, x/75 + x/50 = (2x)/150 + (3x)/150 = (5x)/150. Now, divide the total distance by the total time to find t…
A group of friends want to split a bill of 240 dollars evenly. If there are 10 people, how much will each person pay?	Divide the total bill by the number of people. 240 ÷ 10 = 24. Each person will pay 24. #### 24
The area of a triangle is 24 square inches. If the height of the triangle is 4 inches, what is the base?	The formula for the area of a triangle is (base × height) / 2. Since the area is 24, set up the equation 24 = (base × 4) / 2. Multiply both sides by 2 to get 48 = base × 4. Divide both sides by 4 to get 12 = base. The base of the triangle is 12. #### 12
A bag contains 4 yellow marbles, 6 black marbles, and 2 white marbles. What is the probability of drawing a yellow marble from the bag?	The total number of marbles is 4 + 6 + 2 = 12. The number of yellow marbles is 4. The probability of drawing a yellow marble is 4/12 = 1/3 #### 1/3
Ramesh has 3 boxes of pencils. Each box contains 10 packets and each packet contains 5 pencils. How many pencils does Ramesh have in total?	Ramesh has 3 boxes. Each box has 10 packets. Each packet has 5 pencils. So, Ramesh has 3 * 10 * 5 = 150 pencils. #### 150
A motorcycle is traveling from City X to City Y at an average speed of 40 kilometers per hour. The distance between the two cities is 120 kilometers. How long will the trip take?	Time = Distance / Speed. Time = 120 / 40. Time = 3 hours. #### 3
In a right triangle, the length of the hypotenuse is 8 cm and one of the legs is 4 cm. What is the length of the other leg?	Using the Pythagorean theorem, we get x^2 + 4^2 = 8^2. x^2 + 16 = 64. x^2 = 48. x = sqrt(48) = 4sqrt(3). #### 4sqrt(3)
A square garden measures 8 meters on each side. If a path that is 2 meters wide is built around the garden, what is the area of the path?	The area of the garden is 8 * 8 = 64 square meters. The outer dimensions of the garden with the path are 8 + 4 = 12 meters. The area of the garden with the path is 12 * 12 = 144 square meters. The area of the path is 144 - 64 = 80 square meters. #### 80
A boat travels at 25 kilometers per hour, how many meters does it travel in 2 hours?	A boat travels at 25 km/hr, which means it travels 25 * 1000 = 25000 meters per hour. Since it travels for 2 hours, the total distance is 25000 * 2 = 50000 meters. #### 50000
A bicycle tire has a radius of 14 inches. What is the area of the circle?	Area of a circle is π * r^2. r is 14 inches. So the area is π * (14)^2 = 196π square inches. #### 196
A train travels from City A to City B at an average speed of 80 miles per hour. On the return trip, the average speed is 50 miles per hour. What is the average speed for the entire trip?	Let's assume the distance between City A and City B is x miles. Then, the time taken to cover x miles at 80 miles per hour is x/80. The time taken to cover x miles at 50 miles per hour is x/50. The total time taken is x/80 + x/50. The total distance is 2x. The average speed is total distance divided by total time. We get 2x/(x/80 + x/50). Simplifying, we get (2 * 80 * 50)/(80 + 50) = 64. #### 64
A rectangular prism has a length of 6 cm, a width of 8 cm, and a height of x cm. The volume of the prism is 240 cubic cm. What is the value of x?	Volume of a prism is length * width * height. We know the volume is 240 cubic cm and the length and width are 6 cm and 8 cm. So we have 6 * 8 * x = 240. Solving for x, we get x = 240/(6 * 8) = 5. #### 5
A company has 12 boxes of paper clips. Each box has 36 packets of paper clips. Each packet has 20 paper clips. How many paper clips does the company have in total?	The company has 12 boxes. Each box has 36 packets. So the total packets are 12 * 36 = 432 packets. Each packet has 20 paper clips. So the total paper clips are 432 * 20 = 8640. #### 8640
Ms. Johnson has 12 baskets of oranges. If each basket contains 18 oranges, how many oranges does Ms. Johnson have in total?	To find the total number of oranges, multiply the number of baskets by the number of oranges in each basket. 12 x 18 = 216. #### 216
A rectangular prism has a length of 8 cm, a width of 5 cm, and a height of 6 cm. What is the volume of the prism?	The formula to find the volume of a rectangular prism is length x width x height. 8 x 5 x 6 = 240. #### 240
A group of 12 students want to share some candy equally. If they have 420 pieces of candy, how many pieces of candy will each student get?	To find out how many pieces of candy each student gets, divide the total number of pieces of candy by the number of students. 420 ÷ 12 = 35. #### 35
A company sells 240 units of a product per day. If they make a profit of 1.2 dollars on each unit, what is their total profit per day?	To find the total profit, multiply the number of units by the profit per unit. 240 x 1.2 = 288. #### 288
Ethan used 25 cups of flour to bake 5 batches of cookies. How many cups of flour did Ethan use to bake each batch of cookies?	To find out how many cups of flour were used for each batch, divide the total number of cups of flour by the number of batches. 25 ÷ 5 = 5. #### 5
A furniture store has 12 rows of shelves, and each row can hold 15 chairs. If the store is currently empty, how many chairs can they hold in total?	Number of rows = 12, Number of chairs each row can hold = 15. Total number of chairs = Number of rows * Number of chairs each row can hold = 12 * 15 = 180. #### 180
As of 2025, there are 5,200,000,000 social media users in the world. If 32% of the users are from Asia, how many Asian users are in the world?	Total number of social media users = 5,200,000,000, Percentage of Asian users = 32%. Number of Asian users = Total number of social media users * Percentage of Asian users = 5,200,000,000 * 0.32 = 1,664,000,000. #### 1664000000
Emily has 20 bags of apples. Each bag has 30 apples. If Emily wants to divide the apples equally among 4 of her friends, how many apples will each friend get?	Number of bags = 20, Number of apples each bag has = 30, Total number of apples = Number of bags * Number of apples each bag has = 20 * 30 = 600. Number of friends = 4. Number of apples each friend gets = Total number of apples / Number of friends = 600 / 4 = 150. #### 150
A company sells a total of 540 smartphones and laptops on Friday. They sell 80 more smartphones than laptops. If they sell 230 laptops, how many smartphones did they sell?	Total number of devices sold = 540, Number of laptops sold = 230, Number of smartphones sold = Total number of devices sold - Number of laptops sold = 540 - 230 = 310. Since the company sells 80 more smartphones than laptops, Number of smartphones sold = Number of laptops sold + 80 = 230 + 80 = 310. #### 310
In a right triangle, the length of the hypotenuse is 10 and one of the legs is 6. What is the length of the other leg?	Let the length of the other leg be x. By Pythagoras theorem, x^2 + 6^2 = 10^2. x^2 + 36 = 100. x^2 = 100 - 36 = 64. x = sqrt(64) = 8. #### 8
Ms. Priya invested 2000 rupees in a savings account at a 4% annual interest rate. How much money will Ms. Priya have in 5 years?	If the interest rate is 4% and Ms. Priya invested 2000 rupees, then 4% of 2000 = (4/100) * 2000 = 80 rupees is the amount Ms. Priya earns as interest per year. After 5 years, Ms. Priya earns 80 * 5 = 400 rupees as interest. The total amount of money Ms. Priya has in 5 years is 2000 + 400 = 2400 rupees. #### 2400
The area of a right-angled triangle is 12 square meters, the height is 6 meters, what is the base?	The area of a right-angled triangle is base * height / 2. Therefore, the base = (area * 2) / height = (12 * 2) / 6 = 4 meters. #### 4
If sin(x) = 3/5, what is the value of cos(x)?	If sin(x) = 3/5, then cos(x) = sqrt(1 - (3/5)^2) = sqrt(1 - 9/25) = sqrt(16/25) = 4/5. #### 4/5
A square has a side length of 10 cm. What is the length of its diagonal?	The diagonal of a square splits it into two right triangles. Using Pythagoras theorem, the length of the diagonal is sqrt(10^2 + 10^2) = sqrt(200) = 10 * sqrt(2) = 10 * sqrt(2) = 14.14 cm. #### 14.14
What is the surface area of a cube that is 9 inches on each side?	The surface area of a cube is 6 * side^2 = 6 * 9^2 = 6 * 81 = 486 square inches. #### 486
If a restaurant serves a total of 180 bowls of soup per day and the ratio of vegetable to tomato soup is 2:3, how many bowls of vegetable soup are sold?	Let x be the number of bowls of vegetable soup sold. Using the ratio 2:3, the number of bowls of tomato soup sold is 3x/2. The total number of bowls sold is 180. Therefore, x + (3x/2) = 180. Multiply both sides by 2, 2x + 3x = 360. 5x = 360. Divide both sides by 5, x = 72. #### 72
If a rectangular prism has a volume of 1000 cubic meters and the base has dimensions 10 meters by 10 meters, what is the height of the rectangular prism?	Volume of a rectangular prism is length * width * height. Therefore, 1000 = 10 * 10 * height. Divide both sides by 10 * 10, height = 1000/(10 * 10) = 1000/100 = 10. #### 10
What is the equation of the circle with center at (2, 3) and a radius of 4 units?	Standard form of the equation of a circle is (x - a)^2 + (y - b)^2 = r^2, where (a, b) is the center and r is the radius. Therefore, (x - 2)^2 + (y - 3)^2 = 4^2 = 16. #### 16
If 25% of students in a class scored above 80%, and there are 120 students in the class, how many students scored above 80%?	25% of 120 is 0.25 * 120 = 30. #### 30
A box contains 8 black pens, 12 blue pens, and 10 red pens. What is the probability that a randomly selected pen is not black?	Total number of pens is 8 + 12 + 10 = 30. Total number of non-black pens is 12 + 10 = 22. Probability = Number of non-black pens / Total number of pens = 22/30 = 11/15. #### 11/15
A farmer has 9 baskets of apples. Each basket contains 6 bags of apples. Each bag has 8 apples. How many apples does the farmer have in total?	To find the total number of apples, we first find the total number of bags of apples by multiplying the number of baskets by the number of bags in each basket: 9 x 6 = 54. Then, we multiply the total number of bags by the number of apples in each bag: 54 x 8 = 432. The farmer has 432 apples in total. #### 432
A rectangular prism has a length of 8 inches, a width of 5 inches, and a height of 3 inches. What is the volume of the rectangular prism?	To find the volume of the rectangular prism, we multiply the length by the width by the height: 8 x 5 x 3 = 120. The volume of the rectangular prism is 120 cubic inches. #### 120
A bookshelf has 4 shelves, and each shelf has 5 books. If 3 more shelves are added, and 7 more books are added, how many books will the bookshelf have in total?	To find the total number of books, we first find the total number of books before the new shelves and books are added: 4 x 5 = 20. Then, we add the number of new books to be added: 20 + 7 = 27. We also add the number of new shelves with books: 3 x 5 = 15. The total number of books will be 27 + 15 = 42. The bookshelf will have 42 books in total. #### 42
A box of crayons weighs 3 kilograms. If Sara has 5 boxes of crayons, how much do all the crayons weigh in total?	To find the total weight of the crayons, we multiply the weight of each box by the number of boxes: 3 x 5 = 15. The total weight of the crayons is 15 kilograms. #### 15
A bicycle is on sale for 20% off its original price. If the bicycle costs $120 after the discount, what was its original price?	To find the original price, we first find the amount of the discount by multiplying the discounted price by the percentage discount as a decimal: 120 x 0.2 = 24. Then, we add the amount of the discount to the discounted price to find the original price: 120 + 24 = 144. The original price of the bicycle was 144 dollars. #### 144
Lisa has 15 friends and she wants to split some candy among them. If she wants to give an equal amount of candy to each friend, and she has 210 candies, how many candies will each friend get?	The total number of friends Lisa has is 15. The total number of candies is 210. To find the number of candies each friend gets, we divide 210 by 15. 210 / 15 = 14.####
A car travels from city A to city C at an average speed of 50 km/h and returns at an average speed of 30 km/h. What is the average speed for the entire trip?	The average speed of the car while traveling from city A to city C is 50 km/h. The average speed while returning is 30 km/h. To find the average speed, we need to find the total distance traveled. Let's assume the distance between city A and city C is d. The time taken to travel from city A to city C is d/50. The time taken to return is d/30. The total distance traveled is 2d. The total time take…
A store sells 150 shirts and 200 pants in a day. If the shirts cost 15 dollars each and the pants cost 20 dollars each, how much money did the store make in a day?	The store sells 150 shirts and 200 pants. The shirts cost 15 dollars each and the pants cost 20 dollars each. To find the total amount of money made, we need to calculate the total amount made from shirts and pants separately. The total amount made from shirts is 150 * 15 = 2250. The total amount made from pants is 200 * 20 = 4000. The total amount of money made is 2250 + 4000 = 6250.####
A book costs 25 dollars. If a 10% discount is given, how much will the book cost after the discount?	The original price of the book is 25 dollars. The discount given is 10%. To find the discount amount, we multiply the original price by the discount percentage. 25 * (10/100) = 2.5. The cost of the book after the discount is 25 - 2.5 = 22.5.####
A bakery sells 300 cakes and 400 muffins on Friday. They sell 150 more muffins than cakes. If they sell 250 cakes, how many muffins did they sell?	The bakery sells 250 cakes. They sell 150 more muffins than cakes. To find the number of muffins sold, we add 150 to the number of cakes sold. 250 + 150 = 400.####
A bookshelf has 12 shelves, and each shelf can hold 8 books. If the bookshelf is currently empty, how many books can be placed on it in total?	Multiply the number of shelves by the number of books each shelf can hold. 12 x 8 = 96. #### 96
A toy car track is 20 meters long. If it is extended by 30%, how long will the track be?	Find 30% of the original length (20 meters). 30% of 20 is 0.30 x 20 = 6 meters. Add the extension to the original length. 20 + 6 = 26. #### 26
A bakery sells 240 loaves of bread per day. If they operate 7 days a week, how many loaves of bread do they sell per week?	Multiply the number of loaves sold per day by the number of days. 240 x 7 = 1680. #### 1680
A rectangular garden measures 15 meters by 8 meters. If a path that is 2 meters wide is built around the garden, what is the area of the path?	Find the area of the garden. 15 x 8 = 120 square meters. Find the area of the garden with the path. (15 + 2 + 2) x (8 + 2 + 2) = 19 x 12 = 228 square meters. Subtract the garden area from the total area. 228 - 120 = 108 square meters. #### 108
A baseball player's batting average is 0.320. If he bats 400 times in a season, how many hits can he expect to get?	Multiply the batting average by the number of times he bats. 0.320 x 400 = 128. #### 128
Alex invests $200 at an annual interest rate of 4%. How much interest will Alex earn after 5 years?	Alex earns interest for 5 years. The interest earned per year is 4% of $200. So, the interest earned per year is 0.04 x 200 = $8. Total interest earned in 5 years is 5 x 8 = $40. #### 40
A bookshelf has 5 shelves, and each shelf has 8 books on it. If 3 more books are added to each shelf, how many books are on the bookshelf in total?	Originally, there were 5 x 8 = 40 books on the bookshelf. 3 books are added to each of 5 shelves, so 3 x 5 = 15 more books are added. Total books on the bookshelf now are 40 + 15 = 55. #### 55
A pizza parlor has a total of 24 pizzas. They sell large pizzas at $15 each and small pizzas at $10 each. If the total revenue from pizza sales is $250, how many large pizzas were sold?	Total number of pizzas is 24. Let L be the number of large pizzas sold, so 24 - L is the number of small pizzas sold. Total revenue is $250. Revenue from large pizzas is 15L and from small pizzas is 10(24 - L). The total revenue is the sum of these, so 15L + 10(24 - L) = 250. Simplifying the equation, 15L + 240 - 10L = 250. 5L = 10, so L = 2. #### 2
A rectangular garden has an area of 96 square meters. If its length is 12 meters, what is its width?	The area of the rectangular garden is 96 square meters. Its length is 12 meters. Area of a rectangle is length x width. So, 12 x width = 96. Width = 96 / 12 = 8. #### 8
Mark can complete a project in 12 hours and his friend can complete the same project in 8 hours. If they work together, how many hours will it take to complete the project?	Mark completes the project in 12 hours, so his rate of work is 1/12 project per hour. Similarly, his friend completes the project in 8 hours, so his rate of work is 1/8 project per hour. If they work together, their combined rate of work is 1/12 + 1/8 = 5/24 project per hour. Time taken to complete the project together is the reciprocal of their combined rate of work, so the time taken is 24/5 ho…
A garden has 48 flowers to be planted in rows of 8 flowers each. How many rows can be planted?	To find the number of rows, divide the total number of flowers by the number of flowers per row. 48 ÷ 8 = 6. #### 6
In a triangle, the measure of the second angle is 3 times the measure of the first angle. If the third angle is 45 degrees, what are the measures of the first two angles?	Let the measure of the first angle be x. Then, the measure of the second angle is 3x. x + 3x + 45 = 180, so 4x + 45 = 180. Subtract 45 from both sides: 4x = 135. Divide by 4: x = 33.75. The first angle is 33.75 and the second angle is 3(33.75) = 101.25. #### 33.75, 101.25
A cyclist travels from City A to City B at an average speed of 25 km/h and returns at an average speed of 20 km/h. What is the average speed for the entire trip?	Let the distance between City A and City B be x km. The time for the first leg is x/25 hours, and the time for the second leg is x/20 hours. The total time is x/25 + x/20 = (4x + 5x)/100 = 9x/100 hours. The total distance is 2x km. The average speed is the total distance divided by the total time: 2x / (9x/100) = 200/9 km/h. #### 200/9
A triangle has angles of 40°, 80°, and x°. What is the value of x?	The sum of the angles in a triangle is 180°, so 40° + 80° + x° = 180°. Subtract 120° from both sides: x° = 60°. #### 60
A bookstore has 72 books to be placed on shelves that hold 12 books each. How many shelves will they need?	To find the number of shelves, divide the total number of books by the number of books per shelf. 72 ÷ 12 = 6. #### 6
A cube has a surface area of 150 square meters. What is the length of its side?	The surface area of a cube is given by 6a^2, where a is the length of the side. In this case, we are given that 6a^2 = 150. Dividing by 6 on both sides, we get a^2 = 25. Taking square root on both sides, we get a = 5. #### 5
What is the value of y if y - 2 = 9?	Adding 2 on both sides, we get y = 9 + 2. Hence, y = 11. #### 11
A rectangle has a perimeter of 36 and its length is 6. What is its width?	The perimeter of a rectangle is given by 2l + 2w, where l is the length and w is the width. We are given that 2l + 2w = 36 and l = 6. Substituting l = 6, we get 2(6) + 2w = 36. Simplifying, we get 12 + 2w = 36. Subtracting 12 from both sides, we get 2w = 24. Dividing by 2, we get w = 12. #### 12
The sum of two angles is 120 degrees. If one angle is 40 degrees, what is the other angle?	Let the other angle be x. We are given that x + 40 = 120. Subtracting 40 from both sides, we get x = 80. #### 80
The circumference of a circle is 22π meters. What is its radius?	The circumference of a circle is given by 2πr, where r is the radius. We are given that 2πr = 22π. Dividing by 2π on both sides, we get r = 11. #### 11
A group of students want to share some books equally. If they have 240 books and there are 12 students, how many books will each student get?	To find the number of books each student will get, we can divide the total number of books by the number of students. So, we have 240 books / 12 students = 20 books per student. #### 20
A cyclist travels from Town A to Town B at an average speed of 60 km per hour. If the distance between the two towns is 360 km, how many hours does it take for the cyclist to travel from Town A to Town B?	To find the number of hours it takes for the cyclist to travel from Town A to Town B, we can divide the distance by the average speed. So, we have 360 km / 60 km/h = 6 hours. #### 6
There are 12 people in a line, and each person is wearing a hat that has the number 1, 2, 3, 4, 5, 6, 7, 8, 9, 10, 11, or 12 on it. If the sum of the numbers is 78, what number is on the hat worn by the 9th person?	Since there are 12 people, the sum of the numbers from 1 to 12 is 78. The sum of the numbers from 1 to 12 is (12 * 13) / 2 = 78. Now, if we remove the numbers worn by the 1st to 8th people, we are left with the number worn by the 9th person. The sum of the numbers from 1 to 8 is (8 * 9) / 2 = 36. So, the number worn by the 9th person is 78 - 36 = 42. However, since the number cannot be more than …
In a bag of 12 balls, 4 are yellow, 3 are blue, and the rest are red. What is the probability of picking a red ball?	There are 12 balls in total, and 4 are yellow, and 3 are blue. So, the number of red balls is 12 - 4 - 3 = 5. The probability of picking a red ball is the number of red balls divided by the total number of balls. So, the probability is 5 / 12 = 0.4167 (approximately). #### 0.4167
A farmer sells a total of 600 apples and bananas on a certain day. The number of apples sold is 200 more than the number of bananas sold. How many bananas were sold on that day?	Let's say the number of bananas sold is x. Then, the number of apples sold is x + 200. The total number of fruits sold is x + (x + 200) = 600. We can simplify the equation to 2x + 200 = 600. Subtracting 200 from both sides gives 2x = 400. Dividing both sides by 2 gives x = 200. So, 200 bananas were sold on that day. #### 200
Emily is making a rectangular frame with a perimeter of 20 inches. If the length of the frame is 5 inches, what is the width of the frame?	Let the width of the frame be w. The perimeter of the frame is 20 = 2(5) + 2w. Therefore, 2w = 20 - 10 = 10. So, w = 10 / 2 = 5. #### 5
A fair four-sided die is rolled. What is the probability that the number rolled is less than 3?	There are 4 possible outcomes, out of which 2 are less than 3. So, the probability is 2 / 4 = 1 / 2. #### 0.5
In a certain company, 20% of the employees are engineers. If there are 150 employees in total, how many engineers are there in the company?	If 20% of the 150 employees are engineers, then the number of engineers is (20 / 100) * 150 = 30. #### 30
What is the sum of the interior angles of a quadrilateral?	The sum of the interior angles of a quadrilateral is 360 degrees. #### 360
Samantha is making a square garden with a side of 8 meters. If she wants to install a 1-meter wide path surrounding the garden, what is the area of the path?	The area of the garden is 8 * 8 = 64 square meters. The area of the path is (10 * 10) - 64 = 36 square meters. #### 36
What is the angle of elevation of the sun when the length of a shadow is 5m and the height of the object is 3m?	The angle of elevation, theta, can be calculated using the tangent function: tan(θ) = opposite side/adjacent side = 3m/5m. θ = arctan(3m/5m) = 30.96 degrees. 30.96 ####
In a certain region, the area of a rectangular farm is 2400 square meters. If the length is 40 meters, what is the width of the farm?	Let w be the width. Then, the formula for the area of a rectangle is: Area = length * width = 2400 = 40 * w. Solving for w, we get: w = 2400 / 40 = 60. 60 ####
If 12 of the 15 parts of a machine are functioning, what percentage of the parts are functioning?	The percentage can be calculated as: (Number of functioning parts / Total number of parts) * 100 = (12 / 15) * 100 = 80. 80 ####
What is the length of the hypotenuse of a right triangle with legs 8cm and 15cm?	The length of the hypotenuse can be calculated using the Pythagorean theorem: c^2 = a^2 + b^2, where c is the hypotenuse, and a and b are the legs. c^2 = 8^2 + 15^2, c^2 = 64 + 225, c^2 = 289. c = sqrt(289) = 17. 17 ####
A bakery is having a sale on a certain type of bread. If the original price is 120 and the discount is 20 percent, how much will you pay for the bread?	The discount amount is 20% of 120 = (20/100) * 120 = 24. The sale price will be 120 - 24 = 96. 96 ####
The school library has 18 shelves and each shelf can hold 8 books. If the library currently has 3 empty shelves, how many books are there in total in the library?	First, let's calculate the total number of books the library can hold. There are 18 shelves and each shelf can hold 8 books. So, the total number of books the library can hold is 18 * 8 = 144. Now, there are 3 empty shelves. Therefore, there are 18 - 3 = 15 shelves filled with books. Each shelf has 8 books, so there are 15 * 8 = 120 books. #### 120
Emily has 15 balls in her basket. She gives 3 balls to her brother and 2 balls to her friend. If she puts the remaining balls in bags of 4 each, how many bags can Emily make?	Emily has 15 balls in her basket. She gives 3 balls to her brother and 2 balls to her friend. So, she has 15 - 3 = 12 balls left after giving 3 balls to her brother. Then, she has 12 - 2 = 10 balls left after giving 2 balls to her friend. Now, Emily wants to put these 10 balls in bags of 4 each. To find out how many bags she can make, we can divide 10 by 4. 10 / 4 = 2 with a remainder of 2. There…
The probability of passing a Math test is 0.7. What is the probability that a student will not pass the Math test?	The probability of passing a Math test is 0.7. The probability that a student will not pass the Math test is 1 - 0.7 = 0.3. #### 0.3
Rachel has 16 stickers and she wants to divide them equally among her 4 friends. How many stickers will each friend get?	Rachel has 16 stickers and she wants to divide them equally among her 4 friends. To find out how many stickers each friend will get, we can divide 16 by 4. 16 / 4 = 4. Therefore, each friend will get 4 stickers. #### 4
A basket contains 9 apples and 7 oranges. What is the probability of randomly selecting an apple from the basket?	There are 9 apples and 7 oranges in the basket. The total number of fruits in the basket is 9 + 7 = 16. The probability of randomly selecting an apple from the basket is the number of apples divided by the total number of fruits. Therefore, the probability is 9 / 16. #### 9/16
A library has 20 shelves, and each shelf has 12 books on it. If 8 shelves are added, and each new shelf can hold 10 books, how many books can the library now hold?	The library initially has 20 * 12 = 240 books. With 8 new shelves, it can hold 240 + 8 * 10 = 240 + 80 = 320 books. #### 320
A car dealership sells a total of 150 cars in a week. On Monday, they sell 25 cars. On Tuesday, they sell 30 cars. If they sell the same number of cars on Wednesday and Thursday, how many cars do they sell on Friday to reach the total of 150 cars?	They sold 25 + 30 = 55 cars on Monday and Tuesday. Let's call the number of cars sold on Wednesday and Thursday x. Then, we have 55 + 2x = 150. 2x = 150 - 55 = 95. x = 95 / 2 = 47.5. So, they sell 150 - 55 - 2 * 47.5 = 150 - 55 - 95 = 150 - 150 = 0 cars on Friday. #### 0
A set of weights includes 5 weights that are 2 pounds each, 3 weights that are 5 pounds each, and 2 weights that are 10 pounds each. What is the total weight of the set of weights?	The total weight is 5 * 2 + 3 * 5 + 2 * 10 = 10 + 15 + 20 = 45 pounds. #### 45
A book costs $15. If a 10% discount is applied, how much will the book cost after the discount?	The discount is 10% of $15 = 0.1 * 15 = $1.5. The book will cost $15 - $1.5 = $13.5 after the discount. #### 13.5
A swimming pool can hold 50 people. If 15 people are already in the pool, and 7 more are expected, how many more people can join the pool?	The pool can hold 50 people, and 15 + 7 = 22 people are already in the pool. So, 50 - 22 = 28 more people can join the pool. #### 28
What is the length of the diagonal of a rectangle with a length of 8 meters and a width of 5 meters?	The diagonal of a rectangle is given by the Pythagorean theorem, so we can find its length by taking the square root of the sum of the squares of the length and width. sqrt(8^2 + 5^2) = sqrt(64 + 25) = sqrt(89) = 9.43 #### 9.43
A bakery sells a total of 250 loaves of bread per day. They sell a combination of whole wheat and white bread. If they sell 30 more loaves of whole wheat bread than white bread, and they sell 120 loaves of whole wheat bread, how many loaves of white bread do they sell?	Let x be the number of loaves of white bread. We know that 120 + x + 30 = 250. Solving for x, we get x = 100. #### 100
What is the area of a circle with a radius of 4 cm?	The area of a circle is given by A = πr^2. Plugging in r = 4, we get A = π(4)^2 = 16π = 50.27 #### 50.27
In a school, 60% of the students are boys. If there are 240 students in total, how many girls are there in the school?	Let x be the number of girls. We know that 60% of the students are boys, so 40% are girls. This means 0.4 * 240 = x. Solving for x, we get x = 96. #### 96
A water tank can hold 3000 gallons of water. If 1200 gallons of water are already in the tank, how much more water can be added?	We can find the amount of water that can still be added by subtracting the amount already in the tank from the total capacity. 3000 - 1200 = 1800. #### 1800
Nina has 4 boxes of crayons. Each box has 5 packs. In each pack, there are 3 crayons. If 2 more packs are added, how many crayons does Nina have in total?	First, calculate the total number of crayons Nina has initially: 4 boxes x 5 packs = 20 packs. 20 packs x 3 crayons = 60 crayons. After adding 2 more packs, the total number of crayons will be: 60 + 2 x 3 = 66. #### 66
In a school, there are 6 classes, and each class has 7 groups. If each group has 5 students, what is the total number of students in the school?	To find the total number of students, first find the total number of groups: 6 classes x 7 groups = 42 groups. Then, multiply the total number of groups by the number of students in each group: 42 groups x 5 students = 210 students. #### 210
Victor has 7 more marbles than his 12 pencils. If Victor gives 3 marbles to his brother, what is the difference between the number of marbles and pencils Victor has now?	First, find the number of marbles Victor has initially: 12 pencils + 7 = 19 marbles. After giving 3 marbles away, he has 19 - 3 = 16 marbles. The difference between the number of marbles and pencils is: 16 - 12 = 4. #### 4
In a bookstore, there are 8 shelves, and each shelf has 4 sections. If each section has 3 books, how many books are there in total?	First, find the total number of sections: 8 shelves x 4 sections = 32 sections. Then, multiply the total number of sections by the number of books in each section: 32 sections x 3 books = 96 books. #### 96
A soccer team scored an average of 60 points in 4 games. How many points did they score in total?	To find the total number of points, multiply the average points per game by the number of games: 60 x 4 = 240. #### 240
The height of an object is 50 meters and it casts a shadow of 120 meters. What is the height of another object that casts a shadow of 240 meters?	Since the shadows are proportional to the heights, we can set up the following proportion. height1/height2 = shadow1/shadow2. We can plug in the values given in the problem. 50/height2 = 120/240. Cross multiply to get 50 * 240 = 120 * height2. Divide both sides by 120 to get height2 = 100. Therefore, the height of the other object is 100. #### 100
A bakery is making a special batch of cookies for a holiday sale. If the bakery needs 2/3 cup of sugar for every 3/4 cup of flour, how many cups of sugar will the bakery need if it needs 6 cups of flour?	First, find out how many times 3/4 cup of flour goes into 6 cups. 6/(3/4) = 6 / (3/4) * (4/3) = 6 * (4/3) = 8. Since the ratio of sugar to flour is 2/3 to 3/4, the bakery needs 2/3 * 8 = 16/3 cup of sugar. Multiply numerator and denominator by 3 to get 16/3 = 16/3 * (3/3) = 48/9. Divide numerator and denominator by 3 to get 48/9 = 16/3. #### 16/3
The population of a town is currently 12000. If the population decreases at a rate of 2% per year, what will be the population in 5 years?	First, find the population decrease for 1 year. 12000 * 0.02 = 240. The population after 1 year is 12000 - 240 = 11760. We can continue this procedure for 5 years. After 2 years, the population is 11760 - 11760 * 0.02 = 11491.2. After 3 years, the population is 11491.2 - 11491.2 * 0.02 = 11254.98. After 4 years, the population is 11254.98 - 11254.98 * 0.02 = 11040.78. After 5 years, the populatio…
The cost of a shirt is $15 and the cost of a pair of pants is $25. If John buys 3 shirts and 2 pairs of pants, what is his total cost?	The cost of 3 shirts is 3 * 15 = 45. The cost of 2 pairs of pants is 2 * 25 = 50. The total cost is 45 + 50 = 95. #### 95
What is the slope of the line passing through the points (2,5) and (-1,-3)?	The slope of the line passing through two points is equal to (y2 - y1) / (x2 - x1), where (x1,y1) = (2,5) and (x2,y2) = (-1,-3). Plugging these values in, we get (-3 - 5) / (-1 - 2) = (-8) / (-3) = 8/3. #### 8/3
A bookstore has 15 shelves, and each shelf can hold 8 boxes of books. If the bookstore currently has 75 boxes of books, how many empty boxes can they hold?	If the bookstore has 15 shelves, and each shelf can hold 8 boxes of books, it means the bookstore can hold 15 x 8 = 120 boxes of books. Since there are 75 boxes currently, the bookstore can hold 120 - 75 = 45 empty boxes. #### 45
A person has 18 pencils in a bag. If he gives 2 each to 3 of his friends, how many pencils will he have left?	The person has 18 pencils. He gives 2 pencils each to 3 friends, so he gives 2 x 3 = 6 pencils away. He will have 18 - 6 = 12 pencils left. #### 12
A bakery sells 350 loaves of bread per day. If they make a profit of $0.50 on each loaf, how much profit do they make in a day?	If the bakery sells 350 loaves of bread per day and makes a profit of $0.50 on each loaf, they make a profit of 350 x 0.50 = $175. #### 175
A triangle has angles of 40°, 80°, and x°. What is the value of x?	The sum of angles in a triangle is 180°. So, 40° + 80° + x° = 180°. This implies x° = 180° - 40° - 80° = 60°. #### 60
A group of friends want to share some candy equally. If they have 48 pieces of candy and there are 8 friends, how many pieces of candy will each friend get?	To divide the candy equally, we divide the total number of candies by the number of friends. So, 48 / 8 = 6. Each friend will get 6 pieces of candy. #### 6
Sarah has been saving $50 for 5 months. How much money does she have in total?	Sarah has been saving $50 for 5 months. In total, she has $50 x 5 = $250. #### 250
A snail is at the bottom of a 20-foot well. Each day, it climbs up 3 feet, but at night, it slips back 2 feet. How many days will it take for the snail to reach the top of the well?	The snail climbs 3 feet but slips back 2 feet, so it climbs 1 foot net each day. The well is 20 feet deep, so it will take 20 feet / 1 foot per day = 20 days. #### 20
In a certain city, the population is 25000. If 15% of the population has a pet, how many people have a pet?	We know that 15% of people have a pet. We need to find 15% of 25000. 15% as a decimal is 0.15. So, 25000 x 0.15 = 3750. #### 3750
A bakery has 12 baskets of bread. Each basket has 8 bread loaves. How many bread loaves does the bakery have in total?	The bakery has 12 baskets of bread. Each basket has 8 bread loaves. So, the bakery has 12 x 8 = 96 bread loaves. #### 96
A car is traveling from city A to city B. The distance between the two cities is 240 miles. After driving for 3 hours at a speed of 60 miles per hour, how much distance is left to cover?	The car travels at 60 miles per hour. So, in 3 hours, it travels 60 x 3 = 180 miles. The distance between the two cities is 240 miles. So, the distance left to cover is 240 - 180 = 60 miles. #### 60
Harold has 12 more pencils than his 8 notebooks. If Harold gives 4 pencils to his sibling, what is the difference between the number of pencils and notebooks Harold has now?	Harold has 12 + 8 = 20 pencils and 8 notebooks. After giving 4 pencils, Harold has 20 - 4 = 16 pencils. The difference between the number of pencils and notebooks Harold has now is 16 - 8 = 8 #### 8
A factory has 7 machines and each machine can produce 12 shirts per hour. If the factory operates for 5 hours a day, how many shirts can the factory produce in a day?	The factory produces 7 x 12 = 84 shirts per hour. In 5 hours, the factory produces 84 x 5 = 420 shirts in a day. #### 420
A rectangular garden measures 15 meters by 8 meters. If a path that is 2 meters wide is built around the garden, what is the area of the path?	The outer rectangle measures 15 + 4 = 19 meters by 8 + 4 = 12 meters. The outer rectangle's area is 19 x 12 = 228 square meters. The inner rectangle's area is 15 x 8 = 120 square meters. The area of the path is 228 - 120 = 108 square meters. #### 108
A group of friends want to share some candy equally. If they have 48 candies and there are 8 friends, how many candies will each friend get?	Divide the number of candies by the number of friends. 48 / 8 = 6. Each friend will get 6 candies. #### 6
A pool is 9 meters by 12 meters. If the water is 2 meters deep, what is the volume of water in the pool?	The area of the pool is 9 x 12 = 108 square meters. The volume of water in the pool is 108 x 2 = 216 cubic meters. #### 216
A bookstore has an initial stock of 300 books and is expected to increase at a rate of 25% per month. How many books are there after 3 months?	Let's break down the problem step by step. Initially, there are 300 books. The bookstore increases stock by 25% per month. In the first month, it increases by 300 x 0.25 = 75 books, so the total becomes 300 + 75 = 375. In the second month, it increases by 375 x 0.25 = 93.75, so the total becomes 375 + 93.75 = 468.75. In the third month, it increases by 468.75 x 0.25 = 117.19, so the total becomes…
Tom has 15 boxes of markers with 12 markers in each box. How many markers does Tom have in total?	Let's multiply the number of boxes by the number of markers in each box. The total number of markers is 15 x 12 = 180. #### 180
A factory produces 320 units of a product per day. They produce 8 batches of the product and each batch contains 40 units. How many units of the product are left?	Let's multiply the number of batches by the number of units in each batch to find the total units produced in batches. The total units produced in batches are 8 x 40 = 320 units. This is equal to the total units produced per day. Therefore, there are 0 units of the product left. #### 0
A car travels from City A to City B at an average speed of 50 km/h and returns at an average speed of 30 km/h. What is the average speed for the whole trip?	Let's assume the distance between City A and City B is x km. The total distance traveled is 2x km. The total time taken is the sum of the time taken to travel from City A to City B and the time taken to return. The time taken to travel from City A to City B is x/50 hours. The time taken to return is x/30 hours. The total time taken is x/50 + x/30 = (3x + 5x)/150 = 8x/150 hours. The average speed …
A toy store sells 300 toys at $15 each and 200 toys at $10 each. How much money did the toy store make in total?	Let's calculate the revenue from each type of toy. The revenue from the toys sold at $15 each is 300 x 15 = $4500. The revenue from the toys sold at $10 each is 200 x 10 = $2000. The total revenue is $4500 + $2000 = $6500. #### 6500
There are 5 boxes, each containing 5 identical toys. If each toy has a number from 1 to 5 on it, and the sum of all the numbers on the toys is 60, what number is on the toy in the third box?	Let's examine the situation. Since there are 5 identical toys in each box, the sum of the numbers in each box will be equal. The total sum of all the numbers is 60. Since there are 5 boxes, the sum of the numbers in each box is 60/5 = 12. Now, since each box has 5 identical toys, and the sum of their numbers is 12, each number must be 12/5 = 2.4. However, since each number must be an integer from…
Mark is 2 years younger than Ken. If Ken is 18 years old, how old is Mark?	The problem states that Mark is 2 years younger than Ken. Since Ken is 18 years old, Mark must be 18 - 2 = 16 years old. #### 16
The average of 3 numbers is 15. If the smallest number is 10, what is the sum of the other 2 numbers?	Let's denote the other two numbers as x and y. Since the average of the three numbers is 15, (10 + x + y)/3 = 15. Solving for x + y, we get x + y = 30. #### 30
A cyclist travels from Town A to Town B at an average speed of 80 km/h and returns at an average speed of 60 km/h. What is the average speed of the cyclist for the entire trip?	Let's assume the distance between Town A and Town B is x km. Then, the time taken to travel from A to B is x/80 hours, and the time taken to travel from B to A is x/60 hours. The total time taken is x/80 + x/60 = 2x/(48) hours. The total distance covered is 2x km. Thus, the average speed is (2x)/(2x/(48)) = 48 km/h. #### 48
A bag contains 3 yellow balls, 5 black balls, and 2 white balls. What is the probability that a randomly selected ball is not yellow?	There are a total of 3 + 5 + 2 = 10 balls in the bag. The number of non-yellow balls is 5 + 2 = 7. Thus, the probability of selecting a non-yellow ball is 7/10 = 0.7. #### 0.7
Olivia paints a room that has four walls with a length of 5 meters and a width of 4 meters. If she needs 1 liter of paint to cover an area of 2 square meters, how many liters of paint will she need to buy?	To solve this, we need to first calculate the area of the wall that needs to be painted. Since there are 4 walls, 2 walls will have an area of 5 x 4 = 20 square meters and 2 walls will have an area of 4 x 5 = 20 square meters. The total area is 20 + 20 + 20 + 20 = 80 square meters. To calculate the paint needed, we need to divide the area by 2, which is 80 / 2 = 40 liters. #### 40
Seven friends - Alex, Ben, Charlie, David, Emily, Florence, and Greg - are standing in a line. If Charlie is standing next to Emily, and Greg is standing next to David, and Florence is standing next to Ben, how many ways can they arrange themselves?	To solve this, we need to count the number of ways each person can be arranged. Charlie and Emily can be arranged in 2 ways. Then, Greg and David can be arranged in 2 ways. Then, Florence and Ben can be arranged in 2 ways. Finally, Alex can be arranged in 1 way. The total number of ways is 2 x 2 x 2 x 1 = 8. However, the whole group can be arranged in 2 ways (either from left to right or from rig…
A bakery sells a total of 500 loaves of bread at $2 each. If on a certain day they sell 300 loaves at a 10% discount, how much money did the bakery earn that day?	To solve this, we need to calculate the amount the bakery earned from the discounted loaves and the amount earned from the non-discounted loaves. The amount earned from the discounted loaves is 300 x 2 x 0.9 = 540. The amount earned from the non-discounted loaves is 200 x 2 = 400. The total amount earned is 540 + 400 = 940. #### 940
Ben has 18 boxes of cards, each containing 12 packets of cards. If each packet has 6 cards, how many cards does Ben have in total?	To solve this, we need to calculate the total number of packets Ben has. Ben has 18 boxes, each containing 12 packets, so the total number of packets is 18 x 12 = 216 packets. Each packet has 6 cards, so the total number of cards is 216 x 6 = 1296 cards. #### 1296
A water tank can hold 1000 liters of water. If 300 liters of water are already in the tank, how much more water can be added to the tank?	To solve this, we need to subtract the amount of water already in the tank from the total capacity of the tank. The amount of water that can be added is 1000 - 300 = 700 liters. #### 700
A library has 12 shelves of books. Each shelf can hold 8 boxes of books. If the library already has 6 boxes on each shelf, how many more boxes can they fit?	Number of boxes on each shelf = 8. Number of boxes already on each shelf = 6. Number of boxes they can fit on each shelf = 8 - 6 = 2. Total number of boxes they can fit = 2 * 12 = 24. #### 24
A car travels from city A to city B at an average speed of 60 miles per hour. How many hours will it take to travel 240 miles?	Distance = 240 miles. Speed = 60 miles per hour. Time = distance/speed = 240/60 = 4 hours. #### 4
In the figure above, what is the value of y?	The figure is a right triangle. We can use the Pythagorean theorem: x^2 + y^2 = 10^2. Given x = 6, we can find y: 6^2 + y^2 = 10^2. y^2 = 10^2 - 6^2 = 64. y = sqrt(64) = 8. #### 8
A factory produces 250 units of a product per hour. If they operate for 8 hours, how many units of product will they produce in a day?	Number of units produced per hour = 250. Number of hours they operate = 8. Total number of units produced = 250 * 8 = 2000. #### 2000
What is the value of z if 4z + 2 = 16?	4z + 2 = 16. 4z = 16 - 2 = 14. z = 14/4 = 3.5. #### 3.5
A bookshelf has 12 shelves, and each shelf can hold 8 books. If the bookshelf is currently empty, how many books can be placed on it in total?	To find the total number of books that can be placed on the bookshelf, we multiply the number of shelves by the number of books that each shelf can hold. So, we multiply 12 by 8. 12 x 8 = 96. #### 96
A water tank can hold 1500 gallons of water. If 30% of the tank is already filled, how many more gallons of water can be added?	To find 30% of the tank's capacity, we multiply the capacity by 0.3. So, we multiply 1500 by 0.3. 1500 x 0.3 = 450. This means that 450 gallons of water are already in the tank. To find out how many more gallons can be added, we subtract 450 from the tank's capacity. 1500 - 450 = 1050. #### 1050
A triangle has two angles that measure 30 degrees and 50 degrees. What is the measure of the third angle?	Since the sum of the measures of the angles in a triangle is 180 degrees, we can set up the equation 30 + 50 + x = 180, where x is the measure of the third angle. Combine the left side of the equation to get 80 + x = 180. Subtract 80 from both sides of the equation to get x = 100. #### 100
A certain type of tree grows at an average rate of 2.5 inches per year. If the tree is currently 10 inches tall, how tall will it be in 5 years?	To find the total height of the tree in 5 years, we add the current height to the amount it will grow in 5 years. The tree will grow at an average rate of 2.5 inches per year, so in 5 years, it will grow 2.5 x 5 = 12.5 inches. Add the current height to the amount it will grow to get 10 + 12.5 = 22.5. #### 22.5
A company has three machines that produce identical products. Machine A produces 120 products per hour, Machine B produces 150 products per hour, and Machine C produces 180 products per hour. How many products do the machines produce in total per hour?	To find the total number of products produced per hour, we add the number of products produced by each machine. 120 + 150 + 180 = 450. #### 450
A water tank can hold 1200 liters of water. If 300 liters of water are already in the tank, how much more water can be added?	The capacity of the water tank is 1200 liters. The amount of water already in the tank is 300 liters. To find the amount of water that can be added, subtract the amount of water already in the tank from the capacity of the tank: 1200 - 300 = 900 liters. #### 900
A rectangular garden measures 15 meters by 8 meters. If a path that is 2 meters wide is built around the garden, what is the area of the path?	The area of the garden is 15 * 8 = 120 square meters. The area of the garden with the path is (15 + 2 * 2) * (8 + 2 * 2) = 19 * 12 = 228 square meters. The area of the path is the difference between the area of the garden with the path and the area of the garden: 228 - 120 = 108 square meters. #### 108
A car travels from city A to city B at an average speed of 60 km/h and returns at an average speed of 40 km/h. What is the average speed of the car for the entire trip?	The average speed of the car for the entire trip is the total distance travelled divided by the total time taken. Let the distance between city A and city B be x km. The time taken to travel from city A to city B is x / 60 hours. The time taken to travel from city B to city A is x / 40 hours. The total distance travelled is 2x km. The total time taken is x / 60 + x / 40 = 5x / 120 hours. The aver…
A group of friends want to share some money equally. If they have $120 and there are 8 friends, how much will each friend get?	To find the amount each friend will get, divide the total amount of money by the number of friends: 120 / 8 = 15. #### 15
A cylindrical container has a radius of 4 cm and a height of 10 cm. What is the volume of the container?	The formula for the volume of a cylinder is V = πr^2h, where r is the radius and h is the height. Plugging in the values, V = π(4)^2(10) = 160π cubic centimeters. #### 160π
A bakery has 4 trays, each with 6 cakes. If 2 more cakes are added to each tray, what is the total number of cakes?	First, count the number of cakes originally: 4 * 6 = 24 cakes. Then add the additional cakes: 24 + (4 * 2) = 24 + 8 = 32 cakes. #### 32
A bike has traveled a distance of 240 kilometers. If it traveled 4/5 of this distance in the first two hours, how much distance did it travel in the last hour?	Calculate the distance traveled in the first two hours: 4/5 * 240 = 192 kilometers. Then subtract this from the total distance: 240 - 192 = 48 kilometers. #### 48
A water tank in the shape of a cylinder has a height of 6 meters and a radius of 2 meters. What is its volume?	Calculate the volume: π * (2)^2 * 6 = π * 4 * 6 = 3.14 * 4 * 6 = 75.36 cubic meters. #### 75
What is the value of y in the equation: 3y - 2 = 14?	Add 2 to both sides of the equation: 3y = 14 + 2 = 16. Divide both sides by 3: y = 16 / 3 = 5.33. #### 5
The base of a triangle is 8 meters and its area is 40 square meters. What is its height?	Use the formula for the area of a triangle: Area = (base * height) / 2. Plug in the values: 40 = (8 * height) / 2. Multiply both sides by 2: 80 = 8 * height. Divide both sides by 8: height = 80 / 8 = 10 meters. #### 10
A shoe store has a sale of 15% off on all sneakers. If a sneaker originally costs $80, how much will it cost during the sale?	First, calculate the discount amount by multiplying the original price by the discount percentage. Discount amount = $80 * 0.15 = $12. To find the new price, subtract the discount amount from the original price. New price = $80 - $12 = $68. ####68
What is the length of the hypotenuse of a right triangle with legs of length 5 and 12?	Use the Pythagorean theorem to find the length of the hypotenuse. Hypotenuse^2 = 5^2 + 12^2 = 25 + 144 = 169. Hypotenuse = √169 = 13. ####13
Rachel invested $5,000 at an 8% annual interest rate for 5 years. How much money will Rachel have at the end of the 5 years?	Calculate the total interest earned by multiplying the principal amount by the interest rate and the number of years. Total interest = $5,000 * 0.08 * 5 = $2,000. To find the total amount, add the total interest to the principal amount. Total amount = $5,000 + $2,000 = $7,000. ####7000
The area of a rectangle is 20 more than its perimeter. If the width of the rectangle is 5, what is the length?	Let the length be L. The perimeter is 2(L + 5) = 2L + 10. The area is L * 5 = 5L. Set up an equation based on the given condition. 5L = 2L + 10 + 20. Simplify the equation. 5L = 2L + 30. Subtract 2L from both sides. 3L = 30. Divide both sides by 3. L = 10. ####10
A theatre sells a total of 600 tickets and concessions on a certain day. The number of concessions sold is 120 more than the number of tickets sold. How many tickets were sold on that day?	Let the number of tickets sold be T. The number of concessions sold is T + 120. The total number of tickets and concessions is 600. Set up an equation based on the given condition. T + (T + 120) = 600. Simplify the equation. 2T + 120 = 600. Subtract 120 from both sides. 2T = 480. Divide both sides by 2. T = 240. ####240
What is the length of the side of a square garden with an area of 1024 square feet?	Since it is a square, all sides have equal length, and the area is 1024 square feet. We know that area = side^2. Since the area is 1024, we know that side^2 = 1024. Taking the square root of both sides, we get side = sqrt(1024) = 32. #### 32
In a triangle, the length of the hypotenuse is 15 inches and one of the legs is 12 inches. What is the length of the other leg?	This is a right triangle. Using the Pythagorean theorem, we know that a^2 + b^2 = c^2, where a and b are the legs, and c is the hypotenuse. So, 12^2 + b^2 = 15^2. Simplifying, we get 144 + b^2 = 225. Subtracting 144 from both sides, we get b^2 = 81. Taking the square root of both sides, we get b = sqrt(81) = 9. #### 9
Four friends want to share a bag of candies equally. If they have 48 candies, how many candies will each friend get?	To find the number of candies each friend gets, we need to divide the total number of candies by the number of friends. So, 48 / 4 = 12. #### 12
A rectangular parking lot has an area of 2400 square meters. If the length of the lot is 40 meters, what is the width of the lot?	Since the area is 2400 square meters and the length is 40 meters, we know that area = length * width. So, 2400 = 40 * width. Dividing both sides by 40, we get width = 2400 / 40 = 60. #### 60
In a right triangle, the length of the hypotenuse is 20 cm and one of the legs is 16 cm. What is the length of the other leg?	This is a right triangle. Using the Pythagorean theorem, we know that a^2 + b^2 = c^2, where a and b are the legs, and c is the hypotenuse. So, 16^2 + b^2 = 20^2. Simplifying, we get 256 + b^2 = 400. Subtracting 256 from both sides, we get b^2 = 144. Taking the square root of both sides, we get b = sqrt(144) = 12. #### 12
A car is traveling at a rate of 60 miles per hour. If the car has traveled 240 miles, how many hours has it been traveling?	To find the number of hours, we need to divide the distance traveled (240 miles) by the rate of travel (60 miles per hour). 240 miles / 60 miles/hour = 4 hours. #### 4
David invested $800 at 3% annual interest compounded quarterly. How much will David have in his account after 5 years?	To find the future value, we need to calculate the interest compounded quarterly for 5 years. interest = principal * rate * time = $800 * 3% / 4 * 20 = $120. Total amount = principal + interest = $800 + $120 = $920. #### 920
In how many ways can 8 different toys be arranged in a row?	We can arrange the 8 different toys in a row by multiplying the number of possibilities for each toy. There are 8 possibilities for the first toy, 7 for the second, 6 for the third, and so on. The total number of ways = 8 * 7 * 6 * 5 * 4 * 3 * 2 * 1 = 40320. #### 40320
11 in base 9 is equal to what in base 10?	To convert from base 9 to base 10, we need to multiply the digits by their corresponding powers of 9. (1 * 9^1) + (1 * 9^0) = 9 + 1 = 10. #### 10
A group of friends want to know the probability of rolling an even number on a six-sided fair die. What is the probability?	There are 3 even numbers (2, 4, 6) out of 6 possibilities. The probability = Number of favorable outcomes / Total number of outcomes = 3 / 6 = 1/2. #### 1/2
A bakery has a total of 120 pastries and each pastry costs $2. If the bakery sold all the pastries, what is the total revenue earned by the bakery?	The bakery has 120 pastries and each pastry costs $2. Therefore, the total revenue is 120 x $2 = $240. #### 240
A book costs $75. A 25% discount is applied to the book. How much will the book cost after the discount?	The original price of the book is $75. A 25% discount means the discount is 75 x 0.25 = $18.75. Therefore, the new price is $75 - $18.75 = $56.25. #### 56.25
In a rectangle, the length is 6 meters and the width is 4 meters. What is the area of the rectangle?	The area of the rectangle is the product of the length and width. Therefore, the area is 6 x 4 = 24 square meters. #### 24
What is the perimeter of a square with a side length of 8 meters?	The perimeter of a square is 4 times the side length. Therefore, the perimeter is 4 x 8 = 32 meters. #### 32
Alex has 12 more pencils than his 8 pens. If Alex gives 3 pencils to his friend, what is the difference between the number of pencils and pens Alex has now?	Alex had 12 more pencils than his 8 pens. Therefore, Alex had 8 + 12 = 20 pencils initially. After giving 3 pencils, Alex had 20 - 3 = 17 pencils. Now, the difference between the number of pencils and pens is 17 - 8 = 9. #### 9
A bookshelf has 12 shelves, and each shelf can hold 8 books. How many books can the bookshelf hold in total?	To find the total number of books the bookshelf can hold, we can multiply the number of shelves by the number of books each shelf can hold. So, we have 12 shelves x 8 books/shelf = 96 books. Thus, the bookshelf can hold 96 books in total. #### 96
In a box of 15 chocolates, 5 are dark, 3 are white, and the rest are milk chocolates. What is the probability of picking a milk chocolate?	First, we need to find the total number of milk chocolates. The total number of chocolates is 15, and 5 are dark while 3 are white. So, the number of milk chocolates is 15 - 5 - 3 = 7. The probability of picking a milk chocolate is the number of milk chocolates divided by the total number of chocolates. So, the probability is 7/15. #### 7/15
An office building has 20 floors, and each floor has 10 offices. If each office has 3 employees, how many employees are there in total in the office building?	To find the total number of employees in the office building, we need to find the total number of offices first. We have 20 floors x 10 offices/floor = 200 offices. Now, we can multiply the total number of offices by the number of employees per office to get the total number of employees. So, we have 200 offices x 3 employees/office = 600 employees. Thus, there are 600 employees in total in the o…
A car travels from City A to City B at an average speed of 60 km/h and returns at an average speed of 40 km/h. What is the average speed for the entire trip?	Let's assume the distance between City A and City B is d. Then, the time taken to travel from City A to City B is d/60, and the time taken to return is d/40. The total time taken is the sum of these two times, which is d/60 + d/40. We can find a common denominator, which is 120, and rewrite the fractions as 2d/120 + 3d/120 = 5d/120. The total distance is 2d, so the average speed is (2d)/(5d/120) …
A bakery sells a total of 300 loaves of bread per day. They sell a combination of whole wheat and white bread. If the ratio of whole wheat to white bread is 2:5, how many loaves of whole wheat bread are sold per day?	First, we can find the total number of parts in the ratio, which is 2 + 5 = 7. The total number of loaves sold per day is 300, so each part of the ratio corresponds to 300/7 loaves. Since whole wheat bread corresponds to 2 parts, the number of loaves of whole wheat bread sold per day is (300/7) x 2 = 85.71. However, we can't sell a fraction of a loaf, so we round down to the nearest whole number.…
A bicycle is on sale for 15% off its original price of $80. How much will the bicycle cost after the discount?	Let's first find 15% of the original price. 15% of $80 is $80 x 0.15 = $12. The discount is $12, so the bicycle will cost $80 - $12 = $68. #### 68
A rectangular garden measures 15 meters by 8 meters. If a path that is 2 meters wide is built around the garden, what is the area of the path?	The dimensions of the garden including the path are 15 + 2 + 2 = 19 meters and 8 + 2 + 2 = 12 meters. The area of the garden including the path is 19 x 12 = 228 square meters. The area of the garden itself is 15 x 8 = 120 square meters. The area of the path is 228 - 120 = 108 square meters. #### 108
A football team has won 12 games and lost 8 games. What is the ratio of the number of games won to the number of games lost?	The ratio of the number of games won to the number of games lost is 12:8. This can be simplified to 3:2. #### 3:2
A car travels from city A to city B at an average speed of 60 km/h and returns at an average speed of 40 km/h. What is the average speed for the entire trip?	The average speed for the entire trip can be calculated as 2 x (60 x 40) / (60 + 40) km/h. This is 2 x 2400 / 100 km/h. This is 48 km/h. #### 48
A jar contains 36 red marbles and 28 blue marbles. What is the probability of randomly selecting a blue marble?	The total number of marbles is 36 + 28 = 64. The probability of randomly selecting a blue marble is the number of blue marbles divided by the total number of marbles, which is 28 / 64. This can be simplified to 7 / 16. #### 7/16
Ashley has 300 tickets to sell for a concert. She sold 150 tickets in the morning and 70 more in the afternoon. How many tickets does Ashley have left to sell?	First, we need to find out how many tickets Ashley sold in total. 150 tickets sold in the morning and 70 tickets in the afternoon makes a total of 150 + 70 = 220 tickets sold. Ashley had 300 tickets initially. To find out how many tickets Ashley has left, we need to subtract the tickets sold from the initial number of tickets. 300 - 220 = 80. Ashley has 80 tickets left to sell. #### 80
In a garden, there are 100 flowers. If 35 of them are roses and 25 are daisies, how many flowers that are not roses or daisies are there?	First, we need to find out how many flowers are either roses or daisies. There are 35 roses and 25 daisies, so we need to add these numbers. 35 + 25 = 60 flowers that are either roses or daisies. We started with 100 flowers. To find out how many flowers are not roses or daisies, we need to subtract the flowers that are roses or daisies from the initial number of flowers. 100 - 60 = 40. There are …
Tom's타이 Coordinates are 45°35'20" S, 122°30'20" E. If Tom travels 30 miles east, what are his new coordinates?	Tom's initial longitude is 122°30'20" E. He travels 30 miles east, so his new longitude is 122° + (30 miles / 60 miles per degree). We need to convert miles to degrees. 30 miles is equal to 0.5 degrees. So, 122° + 0.5° = 122.5° E. Tom's new longitude is 122.5° E, and his latitude remains the same. His new coordinates are 45°35'20" S, 122.5° E. #### 45.589, 122.5
Mark has 5 bags of apples. Each bag contains 6 apples. How many apples does Mark have in total?	Mark has 5 bags of apples. Each bag contains 6 apples. To find out how many apples Mark has in total, we need to multiply the number of bags by the number of apples in each bag. 5 bags * 6 apples/bag = 30 apples. Mark has 30 apples. #### 30
There are 200 students in a school. If 60 students are in class A, 40 students are in class B, and the remaining students are in class C, how many students are in class C?	There are 200 students in a school. If 60 students are in class A and 40 students are in class B, then we need to add these numbers to find out how many students are in classes A and B. 60 + 40 = 100 students. We started with 200 students. To find out how many students are in class C, we need to subtract the students in classes A and B from the initial number of students. 200 - 100 = 100. There a…
Tom needs to install tiles on a floor with an area of 256 square meters. If each box of tiles covers 12 square meters, how many boxes of tiles will Tom need to buy?	Let's divide the area of the floor by the area covered by each box of tiles. 256 divided by 12 is 21.33. Since we can't buy a fraction of a box, Tom will need to buy 22 boxes. #### 22
A library has 400 books, and 30% of them are fiction books. How many fiction books are there in the library?	Multiply the total number of books by the percentage of fiction books. 400 multiplied by 0.30 is 120. #### 120
A cube has an edge length of 6 cm. What is the length of its space diagonal?	Use the space diagonal formula: √(3 sides^2) = √(3(6^2)) = √(3(36)) = √(108) = 10.39. #### 10
In a rectangle, if the length is 12cm and the width is 4cm, what is its area?	Multiply the length by the width. 12 multiplied by 4 is 48. #### 48
A deck of cards has 52 cards, of which 13 are spades. What is the probability that a randomly selected card is a spade?	Divide the number of spades by the total number of cards. 13 divided by 52 is 0.25. #### 0.25
As of 2023, there are 7,000,000,000 computers in the world. If 23% of the computers are laptops, how many laptops are in the world?	Let x be the number of laptops. We can set up the equation 0.23 * 7,000,000,000 = x. Solving for x, we get x = 1,610,000,000. #### 1610000000
A group of friends want to share some money equally. If they have $120 and there are 6 friends, how many dollars will each friend get?	To find out how much each friend gets, we divide 120 by 6. So, 120 / 6 = 20. #### 20
Lucia rolls a fair eight-sided die. What is the probability that she rolls a number greater than 5?	The probability of Lucia rolling a number greater than 5 is the number of favorable outcomes divided by the total number of outcomes. The number of favorable outcomes is 2, and the total number of outcomes is 8. So, the probability is 2/8 = 1/4. #### 0.25
A triangle has a perimeter of 21 units. If one side of the triangle is 5 units, another side is 7 units, what is the length of the third side?	Let x be the length of the third side. We know the perimeter is 21, and two sides have lengths 5 and 7. So, we set up the equation 5 + 7 + x = 21. Solving for x, we get x = 9. #### 9
In a bakery, 40% of the cakes are chocolate flavored. If there are 500 cakes in total, how many are chocolate flavored?	40% of 500 cakes = 0.4 × 500 = 200. #### 200
In a parallelogram, the ratio of the lengths of the sides is 2:5:8. If the shortest side has a length of 10, what is the length of the longest side?	The ratio of the longest side to the shortest side is 8:2, so the longest side is 8/2 times the shortest side. The shortest side is 10, so the longest side is 8/2 × 10 = 40. #### 40
A bike is traveling from City A to City B at an average speed of 75 kilometers per hour. The distance between the two cities is 375 kilometers. How long will the trip take?	Time = distance / speed = 375 km / 75 km/h = 5 hours. #### 5
A rectangle has a length of 12 and a width of 8. What is the equation of the diagonal of the rectangle?	The diagonal d = sqrt(l^2 + w^2) = sqrt(12^2 + 8^2) = sqrt(144 + 64) = sqrt(208). #### 14.40 (approximately)
A person travels from city A to city B at 45 km/h and returns at 30 km/h. What is the average speed for the round trip?	First, we need to find the time taken for the round trip. Let the distance between the cities be d. Time for the outward journey = d / 45, and time for the return journey = d / 30. Total time = d / 45 + d / 30 = 3d / 90 + 2d / 90 = 5d / 90. Now, we need to find the total distance = d + d = 2d. Average speed = total distance / total time = 2d / (5d / 90) = 36 km/h. #### 36
How many diagonals does a polygon with 15 sides have?	We can find the number of diagonals using the formula n*(n-3)/2, where n is the number of sides. Plugging in 15, we get 15*(15-3)/2 = 15*12/2 = 90. However, this counts each diagonal twice, so we divide by 2 again. 90/2 = 45. #### 45
If the sides of a rectangle are 9 cm and 3 cm, what is the area of the rectangle?	The area of a rectangle is found by multiplying the length by the width. 9*3 = 27. #### 27
If 2x - 3y = 5 and 4x + y = -2, what is the value of y?	We can solve this system of equations by substitution or elimination. Rearranging the first equation to isolate y, we get y = (2x-5)/3. Substituting this into the second equation, we get 4x + (2x-5)/3 = -2. Multiplying both sides by 3, we get 12x + 2x - 5 = -6. Combining like terms, we get 14x - 5 = -6. Adding 5 to both sides, we get 14x = 1. Dividing by 14, we get x = 1/14. Substituting x back i…
What is the probability of rolling a 1 on a fair six-sided die in three consecutive rolls?	The probability of rolling a 1 on the first roll is 1/6. The probability of rolling a 1 on the second roll given that we rolled a 1 on the first roll is also 1/6, since the rolls are independent. The probability of rolling a 1 on the third roll given that we rolled a 1 on the first two rolls is again 1/6. Multiplying these probabilities together, we get (1/6)*(1/6)*(1/6) = 1/216. #### 1/216
What is the value of x if 3x - 2 = 14?	Adding 2 to both sides, we get 3x = 16. Dividing by 3, we get x = 16/3 = 5 1/3. #### 16/3
A bookshelf contains 240 books on 5 shelves. If each shelf contains an equal number of books, how many books are on each shelf?	Let's divide the total number of books by the number of shelves. 240 ÷ 5 = 48 books per shelf. #### 48
A rectangular prism has a length of 8 cm, a width of 6 cm, and a height of 4 cm. What is the volume of the prism?	The formula for the volume of a rectangular prism is V = lwh. V = 8 x 6 x 4 = 192 cubic centimeters. #### 192
A triangle has angles of 30 degrees, 50 degrees, and x degrees. What is the value of x?	The sum of the angles in a triangle is 180 degrees. So, 30 + 50 + x = 180. Solving for x, we get x = 180 - 30 - 50 = 100. #### 100
A bicycle travels from point A to point B at an average speed of 20 miles per hour. On its return journey, the average speed is 15 miles per hour. What is the average speed of the bicycle for the entire trip?	Let d be the distance between points A and B. The time taken to travel from A to B is d/20. The time taken to travel from B to A is d/15. The total distance traveled is 2d. The total time taken is d/20 + d/15 = (3d + 4d)/60 = 7d/60. The average speed is 2d/(7d/60) = 120/7. #### 120/7
A rectangular garden has a perimeter of 48 meters. If the length is 6 meters more than the width, what are the length and width of the garden?	Let w be the width of the garden. Then, the length is w + 6. The perimeter is 2(l + w) = 2(w + 6 + w) = 2(2w + 6) = 4w + 12. So, 4w + 12 = 48. Solving for w, we get w = 9. The length is 9 + 6 = 15. The length and width are 15 and 9. #### 15, 9
A manager needs to assign three projects to four teams. In how many ways can the manager assign the projects to the teams?	The number of ways the manager can assign the projects to the teams is the number of ways of assigning 3 objects to 4 teams. This is equivalent to 4^3 = 64. #### 64
A bag contains 3 black balls and 5 white balls. If two balls are drawn simultaneously, what is the probability that both balls are black?	The probability of drawing a black ball is 3/8. The probability of drawing another black ball is 2/7. Therefore, the probability that both balls are black is (3/8) × (2/7) = 6/56 = 3/28. #### 3/28
A shopper bought a shirt and a pair of shoes for $50. If the shirt cost x dollars, then the shoes cost 50 - x dollars. If the shirt costs 10 dollars more than the shoes, then x - 10 = 50 - x. Solving for x, we get 2x = 60, and x = 30. How much did the shoes cost?	If the shirt costs 30 dollars, then the shoes cost 50 - 30 = 20 dollars. #### 20
A pizza parlor offers three sizes of pizzas - small, medium, and large. If the small size serves 2 people, the medium size serves 4 people, and the large size serves 6 people, how many people can be served by 2 small, 3 medium, and 1 large pizza?	2 small pizzas serve 2 × 2 = 4 people. 3 medium pizzas serve 3 × 4 = 12 people. 1 large pizza serves 6 people. In total, 4 + 12 + 6 = 22 people can be served. #### 22
A father has 12 apples and wants to distribute them among his 4 children. If he wants to give the same number of apples to each child, how many apples will each child get?	The father has 12 apples and 4 children. Therefore, each child will get 12 / 4 = 3 apples. #### 3
Kevin has a triangular garden with a base of 15 meters and a height of 8 meters. What is the area of the garden?	The area of a triangle is given by (base * height)/2. So the area of the garden is (15 * 8)/2 = 60. #### 60
Mark has three angles in the ratio 5:3:2. If the smallest angle is 24 degrees, what are the measures of the other two angles?	Let's denote the smallest angle as 2x, where x = 12 degrees. Then, the other two angles are 5x and 3x. So, 5x is 5 * 12 = 60 degrees, and 3x is 3 * 12 = 36 degrees. #### 60,36
Samantha has 120 stickers and wants to put them into boxes of 6 stickers each. How many boxes can she fill?	120 divided by 6 is 20. So, Samantha can fill 20 boxes. #### 20
Alex invested $2000 in a bond that yields 5% annual interest, compounded annually. How much was his investment worth after 3 years?	The formula for compound interest is A = P * (1 + r)^n, where A is the resulting amount, P is the principal, r is the rate, and n is the number of years. In this case, P = 2000, r = 0.05, and n = 3. Plugging in the values, A = 2000 * (1 + 0.05)^3 = 2315.625. #### 2315.625
A group of friends want to know the probability of rolling an even number on a six-sided fair die. What is the probability?	There are 3 even numbers (2, 4, and 6) and 6 total possibilities. So, the probability is 3/6, which is 0.5 or 1/2. #### 1/2
Tom has 15 pencils in his pencil case. He gives 3 pencils to his sister, then buys 8 more pencils. How many pencils does Tom have now?	Tom had 15 pencils initially. He gave 3 away, so he had 15 - 3 = 12 pencils. Then he bought 8 more, so he has 12 + 8 = 20 pencils now. #### 20
A factory produces 240 toys in 8 hours. How many toys does it produce per hour?	The factory produces 240 toys in 8 hours. To find out how many toys it produces per hour, we divide 240 by 8. 240 ÷ 8 = 30. #### 30
In a bookstore, the ratio of fiction to non-fiction books is 2:3. If there are 40 fiction books, how many non-fiction books are there?	The ratio of fiction to non-fiction books is 2:3. If there are 40 fiction books, then there are 3/2 × 40 = 60 non-fiction books. #### 60
In a circle, the ratio of the arcs is 2:5:3. What is the degree measure of the smallest arc?	The ratio of the arcs is 2:5:3, so the sum of the ratios is 2 + 5 + 3 = 10. The total degree measure of a circle is 360 degrees. So, the smallest arc is 2/10 × 360 = 72 degrees. #### 72
A restaurant serves a total of 320 meals per day. They serve a combination of breakfast and lunch meals. If they serve 40 more breakfast meals than lunch meals, and they serve 180 breakfast meals, how many lunch meals do they serve?	The restaurant serves 180 breakfast meals. They serve 40 more breakfast meals than lunch meals, so they serve 180 - 40 = 140 lunch meals. #### 140
A library contains 18 science fiction books, 12 romance books, and 6 mystery books. What is the probability of selecting a romance book?	First, find the total number of books, which is 18 + 12 + 6 = 36. The probability of selecting a romance book is the number of romance books divided by the total number of books, so 12/36 = 1/3. #### 0.33
Mr. Rodriguez has 4 boxes of pens with 10 pens in each box. If he gives 3 pens from each box to his colleague, how many pens will he have left?	First, find the total number of pens, which is 4 x 10 = 40. He gives away 3 pens from each box, so he gives away 4 x 3 = 12 pens. To find the number of pens left, subtract the number of pens given away from the total number of pens, so 40 - 12 = 28. #### 28
Ben has 4 stacks of books with 9 books in each stack. How many books does Ben have in total?	To find the total number of books, multiply the number of stacks by the number of books in each stack, so 4 x 9 = 36. #### 36
Alex can type a document in 5 hours and his sister Maya can type the same document in 7 hours. If both Alex and Maya work together, how many hours will it take them to type the document?	First, find the rate at which Alex types, which is 1/5 of the document per hour. Then, find the rate at which Maya types, which is 1/7 of the document per hour. To find their combined rate, add their individual rates, so (1/5) + (1/7) = (7+5)/35 = 12/35. To find the time it takes them to type the document, take the reciprocal of their combined rate, so 35/12. #### 2.92
A farmer has 30 kilograms of apples, 20 kilograms of oranges, and 10 kilograms of bananas. If 25% of the apples, 30% of the oranges, and 20% of the bananas are sold, how many kilograms of fruits are left?	First, find the total number of fruits, which is 30 + 20 + 10 = 60 kilograms. Then, find the amount of each fruit sold, which is 0.25 x 30 = 7.5 kilograms of apples, 0.3 x 20 = 6 kilograms of oranges, and 0.2 x 10 = 2 kilograms of bananas. The total amount of fruits sold is 7.5 + 6 + 2 = 15.5 kilograms. To find the amount of fruits left, subtract the amount sold from the total amount, so 60 - 15.…
A bakery sells 350 loaves of bread daily. They pack 7 loaves of bread in each bag. How many bags do they use daily?	Divide the total number of loaves by the number of loaves in each bag. 350 loaves / 7 loaves/bag = 50 bags. #### 50
A car travels 250 miles in 5 hours. What is the average speed of the car in miles per hour?	Divide the total distance traveled by the total time taken. 250 miles / 5 hours = 50 miles/hour. #### 50
If 85% of the students in a class passed the exam and the total number of students is 40, how many students passed the exam?	Calculate 85% of the total number of students. 85% = 0.85. Multiply the total number of students by the percentage. 0.85 * 40 = 34 students. #### 34
What is the perimeter of a triangle with sides of 5, 6, and 7 inches?	Add the lengths of all sides of the triangle. Perimeter = 5 + 6 + 7 = 18 inches. #### 18
A box contains 18 identical balls. If 3 balls are red, what percentage of the balls are red?	Calculate the percentage by dividing the number of red balls by the total number of balls and multiplying by 100. (3 / 18) * 100 = 16.67%. #### 17
A pair of socks costs $8. What is the cost of 9 pairs of socks?	9 x 8 = 72. #### 72
If it takes 4 hours to travel 20 miles, how many miles can you travel in 3 hours?	20 / 4 = 5 miles per hour. 3 x 5 = 15 miles. #### 15
A bakery sells 240 loaves of bread in 4 days. How many loaves are sold per day?	240 / 4 = 60 loaves per day. #### 60
A bookshelf has 9 shelves, and each shelf has 8 boxes of books. If each box has 10 books, how many books are there on the bookshelf?	9 x 8 = 72 boxes. 72 x 10 = 720 books. #### 720
A farmer has 240 apples and wants to package them in bags of 8 apples each. How many bags can the farmer make?	240 / 8 = 30 bags. #### 30
A bookstore has 18 shelves. If each shelf can hold 12 boxes of books, how many boxes of books can the store hold in total?	The number of boxes of books the store can hold in total is 18 x 12 = 216. #### 216
In how many ways can 4 different phones be arranged on a counter?	The number of ways can be calculated by 4! = 4 x 3 x 2 x 1 = 24. #### 24
A factory produces 1200 machines every month. If they produce 300 machines in the first 5 days of the month, how many machines will they produce on each of the remaining 25 days?	The factory will produce 1200 - 300 = 900 machines. They have 25 days remaining, so they will produce 900 ÷ 25 = 36 machines per day. #### 36
A car rental company has 30 cars available for rent. If the probability of a car being rented is 0.7, how many cars will be rented on an average day?	The number of cars rented on an average day is 30 x 0.7 = 21. #### 21
A bank has 2400 customers. If 1500 of them are women, what is the percentage of women customers?	The percentage of women customers is (1500 ÷ 2400) x 100% = 62.5%. #### 62.5
What is the slope of a line that passes through the points (2, 3) and (4, 6)?	The slope can be calculated using the formula m = (y2 - y1) / (x2 - x1). Plugging in the values, we get m = (6 - 3) / (4 - 2) = 3 / 2. #### 1.5
The probability of drawing a queen from a standard deck of 52 cards is p. What is the value of p?	There are 4 queens in a standard deck of 52 cards. So, the probability of drawing a queen is p = 4 / 52 = 1 / 13. #### 1/13
A gas tank can hold 500 liters of gas. If 150 liters of gas are already in the tank, how much more gas can be added?	The gas tank can hold 500 liters of gas. If 150 liters are already in the tank, then the remaining capacity is 500 - 150 = 350 liters. #### 350
A certain species of trees has an average height of 15 meters, with a standard deviation of 2.5 meters. What percent of the trees will be between 10.5 and 19.5 meters tall?	The percentage of trees between 10.5 and 19.5 meters tall is equal to the percentage of trees within 1 standard deviation of the mean. This is approximately 68%. #### 68
A box contains 3 yellow balls, 5 black balls, and 2 white balls. What is the probability that a randomly selected ball is not yellow?	There are 3 yellow balls out of a total of 3 + 5 + 2 = 10 balls. The probability of selecting a yellow ball is 3 / 10, so the probability of selecting a non-yellow ball is 1 - 3 / 10 = 7 / 10. #### 7/10
A bakery is having a sale on bread. If the bakery normally sells a loaf of bread for $2.50 and they are giving a 20% discount, how much will a loaf of bread cost during the sale?	To find the discount, multiply $2.50 by 0.2 to get $0.50. Then, subtract the discount from the original price to get $2.50 - $0.50 = $2.00. #### 2
A car travels from City A to City B at an average speed of 60 km/h. If the distance between the two cities is 300 km, how many hours will it take for the car to travel from City A to City B?	Divide the distance by the speed to get the time, which is 300 km / 60 km/h = 5 hours. #### 5
What is the value of y in the equation 4y - 2 = 16?	Add 2 to both sides of the equation to get 4y = 18. Then, divide both sides by 4 to get y = 18/4 = 4.5. #### 4.5
The length of a rectangle is 3 cm more than its width. If the area of the rectangle is 24 cm^2, what is the width of the rectangle?	Let the width be w cm. Then, the length is w + 3 cm. The area is length times width, so we get (w + 3) * w = 24. Expanding the equation, we get w^2 + 3w - 24 = 0. Factoring the equation, we get (w + 8)(w - 3) = 0. Solving for w, we get w = -8 ( rejected since width cannot be negative) or w = 3. #### 3
A survey shows that 40% of people in a city prefer coffee, 30% prefer tea, and 10% prefer both coffee and tea. What is the probability that a person prefers coffee or tea?	First, find the probability of preferring coffee or tea by adding the probabilities of preferring coffee and tea, which is 0.4 + 0.3 = 0.7. Since 10% prefer both, we need to subtract this from the sum to avoid double counting, so we get 0.7 - 0.1 = 0.6. #### 0.6
A library has a total of 400 books on its shelves. They have a combination of fiction and non-fiction books. If they have 50 more fiction books than non-fiction books, and they have 220 fiction books, how many non-fiction books do they have?	The total number of books is 400. They have 50 more fiction books than non-fiction books. Let the number of non-fiction books be x. Then, the number of fiction books is x + 50. Therefore, x + (x + 50) = 400. Combining like terms gives 2x + 50 = 400. Subtracting 50 from both sides gives 2x = 350. Dividing both sides by 2 gives x = 175. Therefore, the number of non-fiction books is 175. #### 175
A factory produces 350 toys on Monday and 420 toys on Tuesday. What is the ratio of toys produced on Monday to toys produced on Tuesday?	The ratio of toys produced on Monday to toys produced on Tuesday is 350:420. Dividing both numbers by their greatest common divisor, which is 70, gives the simplified ratio 5:6. #### 5:6
Alex can type a document in 5 hours and his friend Ryan can type the same document in 8 hours. If both Alex and Ryan work together, how many hours will it take them to type the document?	Alex's rate is 1/5 documents per hour, and Ryan's rate is 1/8 documents per hour. Their combined rate is (1/5 + 1/8) documents per hour. The least common multiple of 5 and 8 is 40. Rewriting the fractions with 40 as the denominator gives (8/40 + 5/40) documents per hour = 13/40 documents per hour. To find the time, divide 1 by their combined rate: 1 / (13/40) = 40/13 hours. Simplifying the fracti…
What is the length of the hypotenuse of a right-angled triangle with legs of length 5 cm and 12 cm?	Using the Pythagorean theorem, the length of the hypotenuse is the square root of (5^2 + 12^2), which is the square root of (25 + 144), or the square root of 169. The square root of 169 is 13. #### 13
A cyclist travels from city A to city B at 40 km/h and returns at 20 km/h. What is the average speed for the round trip?	Let the distance between city A and city B be x km. The time taken to travel from city A to city B is x/40 hours. The time taken to travel from city B to city A is x/20 hours. The total time taken for the round trip is (x/40 + x/20) hours = (x/40 + 2x/40) hours = 3x/40 hours. The total distance traveled is 2x km. The average speed is the total distance divided by the total time taken: (2x) / (3x/…
A snail is at the bottom of a 20-foot well. Each day, it climbs up 3 feet, but at night, it slips back 2 feet. How many days will it take for the snail to reach the top of the well?	Let's break it down: it climbs 3 feet every day, but 2 feet of that is slipping back down. So it's effectively climbing 1 foot per day. Since the well is 20 feet deep, it will take the snail 20 feet / 1 foot per day = 20 days to reach the top. #### 20
A rectangular swimming pool is 12 meters long and 8 meters wide. If a path that is 2 meters wide is built around the pool, what is the area of the path?	The area of the inner rectangle is 12 x 8 = 96 square meters. The outer rectangle (the path included) has dimensions 12 + 2 + 2 = 16 meters long and 8 + 2 + 2 = 12 meters wide. Its area is 16 x 12 = 192 square meters. The area of the path is then 192 - 96 = 96 square meters. #### 96
A factory has 3 machines, which produce 210 toys per hour. How many toys will the factory produce in 5 hours?	The factory has 3 machines that produce a total of 210 toys per hour. In 5 hours, the total amount of toys produced is 210 toys per hour x 5 hours = 1050 toys. #### 1050
A group of 12 friends want to share some money equally. If they have $240, how much money will each friend get?	The amount of money per friend is $240 / 12 friends = $20 per friend. #### 20
A water tank can hold 1200 liters of water. If 360 liters of water are already in the tank, how much more water can be added to the tank?	The tank can hold 1200 liters, and 360 liters are already in it. So, the amount of water that can still be added is 1200 - 360 = 840 liters. #### 840
The perimeter of a triangle is 18 meters. If one side is 6 meters long, what is the sum of the remaining two sides?	The perimeter of the triangle is 18 meters. Let the remaining two sides be a and b. Then the total perimeter is a + b + 6 meters. Since a + b + 6 meters = 18 meters, a + b = 12 meters. So the sum of the remaining two sides is 12 meters. #### 12
A car travels from city A to city B. The distance between the two cities is 360 kilometers. The car travels at a speed of 80 kilometers per hour for 3 hours and then at a speed of 40 kilometers per hour for 4 hours. How far is the car from city B?	The distance traveled at a speed of 80 kilometers per hour for 3 hours is 80 * 3 = 240 kilometers. The distance traveled at a speed of 40 kilometers per hour for 4 hours is 40 * 4 = 160 kilometers. The total distance traveled is 240 + 160 = 400 kilometers. Since the total distance between the two cities is 360 kilometers, the car is 400 - 360 = 40 kilometers beyond city B. So the car is 40 kilome…
A bakery sells 250 loaves of bread at $2 each and 120 pastries at$3 each. What is the total amount of money the bakery received?	The total amount of money received from selling 250 loaves of bread at $2 each is 250 * 2 =$500. The total amount of money received from selling 120 pastries at $3 each is 120 * 3 =$360. The total amount of money received by the bakery is $500 +$360 = $860. #### 860
A right triangle has an area of 24 square meters. If the base is 4 meters long, what is the height?	The area of a triangle is given by (base * height)/2. Since the area is 24 square meters and the base is 4 meters, we have (4 * height)/2 = 24. Solving for height, we get height = 12 meters. #### 12
A cube has a surface area of 294 square meters. What is the length of one side of the cube?	The surface area of a cube is given by 6 * (side length)^2. Since the surface area is 294 square meters, we have 6 * (side length)^2 = 294. Solving for side length, we get side length = 7 meters. #### 7
What is the value of x that satisfies the equation 3tan(x) = sqrt(2)?	Immediately, we know that this is a trigonometry problem. We need to find the value of x that satisfies the given equation. To start, we can rearrange the equation to isolate x. Since tan(x) = sqrt(2)/3, and we know that tan(x) = sin(x) / cos(x), then sin(x) / cos(x) = sqrt(2)/3. We can multiply both sides of the equation by cos(x) to get sin(x) = (sqrt(2)/3)cos(x). Since sin(x) is equal to the y…
A swimming pool is in the shape of a cylinder with a radius of 5 meters and a height of 3 meters. What is the volume of the pool?	The volume of a cylinder can be calculated using the formula V = pi * r^2 * h. We have the values r = 5 meters and h = 3 meters. Plugging these values into the formula, we get V = pi * 5^2 * 3 = pi * 25 * 3 = 75 * pi cubic meters. So, the volume of the swimming pool is approximately 235.6194 cubic meters. #### 235.6194
What is the probability that a coin lands on its edge when flipped?	The number of times the coin lands on its edge is 0, as it is physically impossible for a coin to land on its edge. The number of total outcomes (heads or tails) is 2. Therefore, the probability is 0/2 = 0. #### 0
What is the area of a hexagon whose side length is 8 cm?	A hexagon is composed of six equilateral triangles. Each triangle has a side length of 8 cm, which is also the height of the triangle. So, the area of each triangle is A = (1/2)bh = (1/2)(8)(8) = 32 square cm. Since the hexagon is composed of 6 such triangles, then the area of the hexagon is 6 * 32 = 192 square cm. #### 192
A car travels from city A to city B at an average speed of 80 km/h and returns at an average speed of 90 km/h. What is the average speed of the car for the entire trip?	To find the average speed, we need to know the total distance and the total time. The total distance is the same for both trips, let's call it d. The time taken for the first trip is t1 = d / 80 and the time taken for the second trip is t2 = d / 90. The total time is t = t1 + t2 = d / 80 + d / 90 = d(90 + 80) / (90 * 80) = 17d / 720. The total distance is 2d. So, the average speed is v = 2d / (17…
What is the number of ways to arrange the letters in the word 'LISTEN'?	The number of permutations in the word 'LISTEN' is 6! = 720. #### 720
A rectangular garden measures 20m by 15m. If a path that is 2m wide is built around the garden, what is the area of the path?	First, find the area of the garden: 20 x 15 = 300. The outer dimensions of the garden, including the path, are 24m x 19m. So, the area of the garden and the path is 24 x 19 = 456. To find the area of the path, subtract the area of the garden from the total area: 456 - 300 = 156. #### 156
A bakery sells a total of 600 loaves of bread and buns on a certain day. If the number of loaves sold was 4/5 of the total number of items sold, how many buns were sold?	The number of loaves sold is 4/5 of the total number of items, which is 600. So, 4/5 of 600 = 480 loaves sold. The number of buns sold is the total minus the number of loaves: 600 - 480 = 120. #### 120
A car travels from City A to City B at an average speed of 50 km/h and returns at an average speed of 70 km/h. What is the average speed of the car for the entire trip?	Let's assume the distance from City A to City B is d km. The total time it takes for the trip there and back is (d / 50) + (d / 70). The total distance is 2d km. So, the average speed is total distance / total time = 2d / [(d / 50) + (d / 70)]. Solving, we get 59.52. #### 59.52
A company's profit increases by 20% annually. If the initial profit is $1000, what is the profit after 4 years?	The profit after one year is $1000 x 1.20 = $1200. The profit after two years is $1200 x 1.20 = $1440. The profit after three years is $1440 x 1.20 = $1728. The profit after four years is $1728 x 1.20 = $2073.60. #### 2073.60
A factory produces a total of 450 toys per day. They produce a combination of cars and dolls. If they produce 70 more cars than dolls, and they produce 190 cars, how many dolls do they produce?	Let the number of dolls produced be x. The number of cars produced is 70 more than the number of dolls, so it is x + 70. The total number of toys produced is 450. We can set up the equation x + (x + 70) = 450 to solve for x. Simplifying the equation, we get 2x + 70 = 450. Subtracting 70 from both sides, we get 2x = 380. Dividing both sides by 2, we get x = 190. So, the factory produces 190 - 70 =…
There are 12 people in a line, and each person is wearing a hat that has the number 1, 2, 3, 4, 5, 6, 7, 8, 9, 10, 11, or 12 on it. If the sum of the numbers is 78, what number is on the hat worn by the 9th person?	Since there are 12 people, the sum of the numbers from 1 to 12 is 12*(12 + 1)/2 = 78. The sum of the numbers from 1 to 12 is the same as the sum of the numbers on the hats. The number on the hat worn by the 9th person is 78 - (1 + 2 + 3 + 4 + 5 + 6 + 7 + 8 + 10 + 11 + 12) = 78 - 68 = 10. #### 10
A bookshelf has 8 shelves, and each shelf can hold 15 books. If the bookshelf is currently empty, how many books can be placed on it in total?	The bookshelf has 8 shelves, and each shelf can hold 15 books. So, the total number of books that can be placed is 8 * 15 = 120. #### 120
A group of friends went to an amusement park. They rode 5 roller coasters, 8 water rides, and x other rides. If they rode a total of 25 rides, how many other rides did they ride?	Let the number of other rides be x. The total number of rides is 5 + 8 + x = 25. Simplifying the equation, we get 13 + x = 25. Subtracting 13 from both sides, we get x = 12. #### 12
A snail is at the bottom of a 20-foot well. Each day, it climbs up 3 feet, but at night, it slips back 2 feet. How many days will it take for the snail to reach the top of the well?	The snail climbs 3 feet up each day and slips 2 feet back at night, so it is effectively climbing 3 - 2 = 1 foot per day. To climb 20 feet, it will take 20 / 1 = 20 days. #### 20
A jar contains 7 blue marbles, 4 green marbles, and 3 yellow marbles. What is the probability of drawing a yellow marble from the jar?	To find the probability, divide the number of yellow marbles by the total number of marbles. There are 3 yellow marbles out of a total of 7 + 4 + 3 = 14 marbles. So, the probability is 3/14 = 0.2143. #### 0.2143
In a certain sequence of numbers, each number is obtained by multiplying the previous number by 2. If the first number is 4, what is the 7th number in the sequence?	Start with the first number, which is 4. Multiply it by 2 to get the second number: 4 x 2 = 8. Multiply 8 by 2 to get the third number: 8 x 2 = 16. Continue this process until you reach the 7th number: 4, 8, 16, 32, 64, 128, 256. The 7th number in the sequence is 256. #### 256
A factory produces 12 boxes of chocolates per hour. If the factory operates for 8 hours, how many boxes of chocolates are produced in total?	Multiply the number of boxes produced per hour by the number of hours the factory operates: 12 boxes/hour x 8 hours = 96 boxes. The factory produces 96 boxes of chocolates in total. #### 96
What is the value of x in the equation: x - 2 = 9?	Add 2 to both sides of the equation to isolate x: x - 2 + 2 = 9 + 2. This simplifies to x = 11. The value of x is 11. #### 11
A gym has 15 treadmills, 20 stationary bikes, and 10 elliptical machines. If 30% of the treadmills, 25% of the stationary bikes, and 20% of the elliptical machines are in use, how many machines are in use in total?	First, find the number of machines in use for each type. For treadmills: 30% of 15 = 0.3 x 15 = 4.5, which rounds up to 5 machines. For stationary bikes: 25% of 20 = 0.25 x 20 = 5 machines. For elliptical machines: 20% of 10 = 0.2 x 10 = 2 machines. Add the number of machines in use for each type: 5 + 5 + 2 = 12 machines. A total of 12 machines are in use. #### 12
A box contains 8 red, 9 blue and 7 yellow balls. What is the probability that a randomly drawn ball is blue?	The probability of a drawn ball being blue = Number of blue balls / Total number of balls = 9 / (8 + 9 + 7) = 9 / 24 = 3/8 #### 0.375
A car's tank can hold 60 liters of gasoline. If the car's driver fills up the tank from empty and it costs $1.20 per liter, how much did the driver pay?	Total amount of gas = 60 liters. Cost per liter = $1.20. Total cost = Total amount of gas * Cost per liter = 60 * $1.20 = $72 #### 72
Rachel has 4 boxes of crayons. In each box, there are 5 packets. In each packet, there are 8 crayons. How many crayons does Rachel have in total?	Total boxes = 4. Crayons per box = 5 * 8. Total crayons = Total boxes * Crayons per box = 4 * 5 * 8 = 160 #### 160
A bakery sells 120 croissants per day. If they make a profit of $1.00 per croissant, how much profit do they make in a day?	Total croissants sold per day = 120. Profit per croissant = $1.00. Total profit per day = Total croissants sold per day * Profit per croissant = 120 * $1.00 = $120 #### 120
A department store's revenue increases according to the equation R(t) = 2000e^0.1t, where R is the revenue at time t in years. What is the revenue after 3 years?	Given equation: R(t) = 2000e^0.1t. To find the revenue after 3 years, plug in t = 3 in the equation. R(3) = 2000e^0.1*3 = 2000e^0.3 = 2663.86 #### 2664
A laptop costs $1200. They offer a 15% discount. How much will the laptop cost after the discount?	First, find 15% of $1200. 15% is $\frac{15}{100} = 0.15$. 0.15 x $1200 = $180. To find the price after the discount, subtract $180 from $1200. $1200 - $180 = $1020. #### 1020
Alex used 12 batteries to power 4 toys. How many batteries did Alex use to power each toy?	Divide the total number of batteries by the number of toys. 12 ÷ 4 = 3. #### 3
A bag contains 7 yellow marbles, 5 red marbles, and 3 green marbles. If 2 marbles are drawn at random, what is the probability that both are red?	There are 5 red marbles out of a total of 7 + 5 + 3 = 15 marbles. The probability of drawing one red marble is $\frac{5}{15} = \frac{1}{3}$. The probability of drawing another red marble after one has already been drawn is $\frac{4}{14} = \frac{2}{7}$. Multiply the two probabilities together to get the probability of drawing two red marbles. $\frac{1}{3} \times \frac{2}{7} = \frac{2}{21}$. #### 2…
A triangle has angles of 40 degrees, 80 degrees, and x degrees. What is the value of x?	The angles of a triangle add up to 180 degrees. 40 + 80 + x = 180. Subtract 40 and 80 from both sides. x = 180 - 120 = 60. #### 60
The area of a rectangle is 48 square inches. If the length of the rectangle is 8 inches, what is the width?	The area of a rectangle is length times width. 48 = 8 × width. Divide both sides by 8 to get width = 48 ÷ 8 = 6. #### 6
A bakery has 48 pies that need to be boxed in sets of 6. How many boxes are needed?	To find the number of boxes, we can divide the total number of pies by the number of pies per box. 48 ÷ 6 = 8 boxes are needed. #### 8
A carpenter has 18 meters of wood. If he needs 1/4 of a meter of wood to make one chair, how many chairs can he make?	To find the total number of chairs the carpenter can make, we can divide the total amount of wood by the amount needed per chair. First, convert the fraction 1/4 to a decimal by dividing by 4. 1 ÷ 4 = 0.25. Now, divide the total amount of wood by the amount needed per chair. 18 ÷ 0.25 = 72. #### 72
A group of students want to share 75 stickers equally. If there are 5 students, how many stickers will each student get?	To find the number of stickers each student will get, we can divide the total number of stickers by the number of students. 75 ÷ 5 = 15. #### 15
A library has 21 shelves, and each shelf can hold 12 books. If the library is currently empty, how many books can they hold in total?	To find the total number of books the library can hold, we can multiply the number of shelves by the number of books each shelf can hold. 21 × 12 = 252. #### 252
In a certain area, John can fix 2 computers in 4 hours. If he hires 3 more technicians who work at the same rate, how many computers can they fix in 8 hours?	First, find the rate at which one technician can fix computers. 2 computers ÷ 4 hours = 0.5 computers per hour. Now, find the total number of computers the technicians can fix in 8 hours. (0.5 computers/hour × 4 technicians) × 8 hours = 16 computers. #### 16
Samantha has 12 more pencils in her pencil case than her brother. If her brother has 15 pencils, how many pencils does Samantha have?	Samantha has 15 pencils plus 12 more pencils. So she has 15 + 12 pencils. 15 + 12 is 27. #### 27
A bicycle rental shop has 24 bicycles. They rented 12 bicycles today and lost 4 bicycles yesterday. How many bicycles does the shop have left?	The shop started with 24 bicycles. Then they lost 4, so 24 - 4 = 20. After renting 12, they have 20 - 12 = 8 bicycles left. #### 8
A factory produces 36 boxes of toys. Each box can hold 9 toys. How many toys can the factory hold in total?	The factory has 36 boxes. Each box holds 9 toys. So there are 36 * 9 toys in total. 36 * 9 is 324. #### 324
Laura can complete a task in 5 hours, and John can complete it in 3 hours. If they work together, how many hours will it take them to complete the task?	In 1 hour, Laura does 1/5 of the task, and John does 1/3 of the task. In total, they do 1/5 + 1/3 of the task in 1 hour. 1/5 + 1/3 is 8/15. So it will take them 15/8 = 1.875 hours to complete the task. #### 1.875
Tom's phone battery lasts 6 hours longer than his friend's phone battery. If his friend's phone battery lasts 9 hours, how long does Tom's phone battery last?	Tom's phone battery lasts 9 hours plus 6 more hours. So it lasts 9 + 6 = 15 hours. #### 15
In a class of 70 students, 40 speak Mandarin, 30 speak Arabic, and 10 speak both languages. What is the probability that a student speaks at least one language?	The total number of students is 70, the number of students speaking Mandarin is 40, the number of students speaking Arabic is 30, and the number of students speaking both languages is 10. We can use the formula for the probability of union of two events. In this case, the events are Mandarin and Arabic. So, P(Mandarin or Arabic) = P(Mandarin) + P(Arabic) - P(Mandarin and Arabic) = (40/70) + (30/7…
Emily has $250 and she wants to buy a bicycle that costs $420. How much more money does Emily need to buy the bicycle?	Emily has $250 and the bicycle costs $420. To find out how much more money Emily needs, we need to subtract the money Emily has from the cost of the bicycle. 420 - 250 = 170 #### 170
A box contains 5 yellow pencils, 7 black pencils, and 3 blue pencils. What is the number of ways to select 3 pencils from the box if the pencils are distinguishable?	There are a total of 5 + 7 + 3 = 15 pencils. To find the number of ways to select 3 pencils, we can use the permutation formula. The number of ways to select 3 pencils is 15P3 = 15*14*13 = 2730 #### 2730
A software generates a random number between 1 and 200. What is the probability that the number is less than 100?	The total number of possible outcomes is 200, and the number of outcomes less than 100 is 100 - 1 = 99. So, the probability of the number being less than 100 is 99/200 #### 99/200
A bookstore sells 300 books at $10 each and 150 magazines at $5 each. How much money did the bookstore make in total?	The bookstore sells 300 books at $10 each, so the total amount of money made from books is 300 * 10 = 3000. The bookstore sells 150 magazines at $5 each, so the total amount of money made from magazines is 150 * 5 = 750. The total amount of money made is 3000 + 750 = 3750 #### 3750
Billy has 36 pencils in his bag. He gives 8 to his sister, 6 to his brother, and 4 to his friend. How many pencils does Billy have left?	Billy has 36 pencils initially. After giving 8 to his sister, he has 36 - 8 = 28 pencils. After giving 6 to his brother, he has 28 - 6 = 22 pencils. After giving 4 to his friend, he has 22 - 4 = 18 pencils. #### 18
A total of 450 books are stacked in 15 shelves. If each shelf has an equal number of books, how many books are on each shelf?	To find the number of books on each shelf, divide the total number of books (450) by the number of shelves (15). 450 ÷ 15 = 30. #### 30
[truncated: 6,629 more rows]
