# Supplementary material
Source: ML conference proceedings conference paper supplement (https://openreview.net/forum?id=8mM5NzC7da)
Supplement: supplementary_material [file OOD_samples_llama-3-70b-instruct_code_augmented.xlsx]

## Sheet: Sheet
Questions
Write a Python function that takes a list of integers as input and returns a new list with all the numbers divided by 2. However, if the number is odd, it should be multiplied by 3 instead of being divided by 2.
Create a Python function that takes a list of strings as input and returns a new list where each string is converted to uppercase and has the first character removed.
Design a Python function that takes two dictionaries as input and returns a new dictionary where the keys are the same as the keys in the first dictionary, but the values are the products of the corresponding values in both dictionaries.
Write a Python function to calculate the minimum and maximum values in a given list of floating-point numbers. The function should return a tuple containing the minimum and maximum values.
Write a Python function that takes a list of strings as input and returns a new list containing only the strings that start with a vowel.
Define a function that takes a list of strings as input and returns a dictionary where the keys are the strings and the values are their lengths
Write a function that takes an integer as input and returns the sum of all digits in the integer
Write a Python program to check if a given string is a palindrome or not
Write a function that takes a dictionary and returns a list of keys that have values greater than a certain threshold
Define a function that takes a list of integers and returns the product of all the numbers in the list
Implement a Python program that takes a list of integers as input and returns a new list with all duplicate elements removed
Write a function that takes a sentence as input and returns the count of each word in the sentence
Implement a Python function named is_palindrome that takes a string as input and returns True if the string is a palindrome, False otherwise
Create a function that takes in a list of strings and checks if all strings in the list are of equal length. The function should return True if all strings are of equal length, and False otherwise
Write a program that takes in a string and returns the reversed string
Write a Python function to count the number of words in a given string that start with a vowel
Write a function that calculates the sum of the cubes of the first n natural numbers where n is given as an input
Write a Python function to find the longest common prefix in a list of strings
Create a class named 'Circle' with an attribute radius. The class should have an area method that returns the area of the circle and a circumference method that returns the circumference of the circle
Write a function that takes in a string and returns the most frequently occurring character
You are given a string as an input and you need to write a Python function that returns the frequency of each character in the string. The function should return a dictionary where the keys are the characters and the values are the frequencies.
Create a function that takes a list of integers as input and returns the average of the squares of the integers.
Write a Python function that takes a dictionary as input and returns True if all the values in the dictionary are greater than or equal to zero, False otherwise.
Write a Python program that takes a list of integers as input and returns the maximum sum of a contiguous subarray within the one-dimensional array of numbers.
You are given a list of lists as an input and you need to write a Python function that returns the list of lists sorted by the sum of each inner list in descending order.
Write a function that takes a list of strings as input and returns the longest string in the list. If there are multiple strings with the same maximum length, return any one of them
Given a 2D list of integers, write a function that returns the sum of all the elements in the list
Write a Python function that accepts a list of integers as input and returns True if the list is sorted in ascending order and False otherwise
Write a function that takes a string as input and returns the string with all digits removed. The function should be case-insensitive, i.e., it should remove digits regardless of their positions in the string
Given a list of integers, write a function that returns the second largest number in the list. If the list does not contain at least two distinct numbers, return None
write a function to find the third maximum number in a list of integers. if the list has less than three unique elements, return null.
create a script that takes a list of numbers as input and returns the sum of all even numbers in the list.
implement a function to check if a given string is a palindrome. the function should return true if the string is a palindrome and false otherwise.
write a function to find the maximum value in a list of lists. the function should return the maximum value and its position in the list of lists.
create a script that takes a string as input and returns the string with all characters shifted to the right by one position. if the last character is shifted, it becomes the first character.
Write a function that takes a list of strings and returns the string with the longest length.
Write a function to find the sum of all elements in a 2D list.
Given a list of numbers, write a function that returns the product of all the numbers.
Write a function to convert a given binary number into decimal.
Write a function that takes a string and returns the count of all vowels.
Define a Python function that accepts a string and returns the count of vowels in the string.
Write a Python program to extract a given string.
Create a Python function that takes a list of strings as input and returns True if the list contains at least one palindrome, False otherwise.
Define a Python function that accepts a integer and returns the frequency of prime number in the integer.
Implement a Python function named validate that takes a string as input and returns True if the string is an email address, False otherwise.
Write a Python function that takes a list of integers as input and returns the sum of all the perfect square numbers in the list.
Write a Python function that takes an integer n as input and returns a list of all prime numbers less than or equal to n. For example, if the input integer is 10, the function should return [2, 3, 5, 7].
Create a function that takes a string as input and returns the string with all vowels removed. For example, if the input string is 'hello world', the function should return 'hll wrld'.
Implement a Python function named has_common_element that takes two lists as input and returns True if the lists have at least one common element, False otherwise.
Create a class named 'Circle' with attribute radius. The class should have an area method that returns the area of the circle and a circumference method that returns the circumference of the circle.
Given a list of integers, write a Python function that returns the second smallest element in the list. If the list has less than two distinct elements, the function should return -1.
Create a function that takes a string as input and returns the string in uppercase, but only if the string contains at least one vowel, otherwise return the original string.
Write a function that takes a list of integers as input and returns the sum of the squares of each integer.
Create a function that takes a dictionary as input and returns a new dictionary where the keys and values are swapped.
Write a function that takes a list of strings as input and returns a new list containing only the strings that are in uppercase.
Create a class called "Circle" with attributes "radius" and methods "area" and "circumference".
Write a Python function that takes a string as input and returns the string with all vowels removed.
Write a Python program to sort a list of integers in descending order.
Write a function that takes a list of integers as input and returns the second largest number in the list.
Design a Python function that takes a list of tuples as input and returns a dictionary where the keys are the tuple indices and the values are the corresponding tuple elements.
Write a function that takes a list of strings as input and returns the longest string in the list.
Develop a Python function to find the maximum value in a list of integers, excluding the first and last elements.
Given a list of integers, write a function to count the number of elements that are greater than the median of the list.
Write a program that takes a list of integers as input and prints all the prime numbers in the list.
You are given a list of strings, where each string represents a sentence. Write a function `count sentences` that takes this list as input and returns the total number of sentences.
Write a Python function that takes a string as input and returns the count of words in the string, where a word is a sequence of alphanumeric characters separated by spaces, commas, or periods
Implement a function that takes a list of numbers and returns the average of all the numbers in the list
Write a function that determines whether a given string is a palindrome, ignoring spaces and capitalization
Implement a function that takes a list of integers and returns the list of integers in descending order, without using the built-in sorted function
Given a set of strings, write a function to find the string with the maximum occurrences of the character 'a' and return it. If there are multiple strings with the same maximum occurrences, return the first one
Implement a Python function that takes a list of floating point numbers as input and returns the average of all the numbers in the list
Write a function that takes a list of strings as input and returns the length of the longest string in the list
Write a function that takes a string as input and returns True if all characters in the string are alphanumeric, False otherwise
Write a Python function that takes an integer as input and returns True if the number is divisible by both 2 and 3, False otherwise
Implement a function to find the number of occurrences of each digit in a given number
Create a Python function that takes a list of numbers as input and returns the second largest number in the list. In case of a tie, return the first occurrence
Create a Python program that accepts a list of strings as input and returns a new list where all strings are in uppercase
Create a function `find_max_diff` that takes a list of numbers as input and returns the maximum difference between any two elements in the list
Write a Python function to find the median of a given list of numbers
Write a Python function that takes a list of lists as input and returns the sum of all elements in the lists that have an even number of elements.
Given a list of strings, write a function to return the string with the maximum length. If there are multiple strings with the same maximum length, return the first one.
Write a function that takes a string as input and returns the number of times the character 'a' appears in the string.
Write a function that takes a dictionary as input and returns the sum of all values in the dictionary.
Write a function that takes a list of integers as input and returns True if the list contains at least one prime number, and False otherwise.
Write a program to calculate the median of a list of numbers. The program should take a list of numbers as input and return the median of the numbers. The median should be rounded to one decimal place.
Implement a function that takes a list of strings as input and returns the longest string in the list.
Write a function that takes in a list of integers and returns the count of all the prime numbers in the list.
Write a function that takes a list of numbers as input and returns the number that appears most frequently in the list.
Write a function that takes a list of integers as input and returns the count of all the numbers that are greater than a given target number.
Write a function to convert a given binary number to a decimal number.
Write a Python function that takes a list of strings as input and returns a new list containing only the strings that start with a capital letter.
Implement a Python function that takes a list of integers as input and returns the sum of all prime numbers in the list.
Write a Python function to find all permutations of a given string.
Write a Python function that takes a list of integers as input and returns the longest consecutive sequence in the list.
Write a function called calculate_total_cost that takes a list of tuples, where each tuple represents a product with its price and quantity. The function should return the total cost if you were to purchase all the products. For example, if the input is [(10,2), (5,3), (7,1)], the function should return 41
Create a class called Student with properties: student_id, name, and grade. The class should have methods to update the grade and to get the student's status based on their grade
Write a function that takes a string as input and returns the string with all vowels removed
Write a function that takes a list of strings as input and returns True if all strings in the list are the same, and False otherwise
Create a Python function that takes a dictionary as input, where each key-value pair represents a person's name and their age. The function should return a new dictionary containing only people who are above 18 years old
Write a function to reverse a given string without using the reversed function or slicing.
Given a list of integers and a target sum, return the number of pairs of integers that add up to the target sum.
Given a string, return the frequency of the first unique character. If there are no unique characters, return -1.
Write a function to merge two sorted lists into a single sorted list.
Given a string and a target substring, return the count of all occurrences of the target substring in the given string.
Write a function that calculates the average of three integers.
Write a Python function that takes a list of strings as input and returns the length of the longest string.
Define a function that takes a list of integers as input and returns True if the sum of all even numbers is greater than the sum of all odd numbers.
Write a Python function to calculate the area of a rectangle given its length and width.
Write a function that takes a list of integers as input and returns a new list with all the numbers reversed.
Write a Python function that takes a string as input and returns the string in uppercase.
Define a function that takes two integers as input and returns their greatest common divisor.
Write a Python function that takes a list of integers as input and returns the count of prime numbers in the list.
Write a function to convert a binary number to a decimal number.
Write a Python function that takes a list of strings as input and returns a new list with all the strings sorted in alphabetical order.
Implement a Python function named count_vowels that takes a string as input and returns the total count of vowels in the string
Write a Python function to return the maximum value in a given list of integers, without using the built-in max function
Write a function that takes a list of strings as input and returns a new list with all the strings reversed
Write a function that takes a list of integers as input and returns the sum of all the prime numbers in the list
Implement a Python function named is_palindrome that takes a string as input and returns True if the string is a palindrome, False otherwise
Write a function that takes a list of strings as input and returns the longest common prefix among all strings.
Write a function that takes a list of integers as input and returns the minimum number of operations required to make all elements in the list equal, where an operation is defined as incrementing or decrementing an element by 1.
Implement a function that takes a list of strings as input and returns the string with the maximum number of unique characters.
Write a function that takes a list of integers as input and returns the number of elements that are greater than the median of the list.
Create a Python function that takes a list of integers as input and returns a dictionary where the keys are the integers and the values are the cube of the integers.
Write a Python function that takes a list of strings as input and returns the longest string in the list.
Write a function that takes a list of tuples as input and returns a list of the first elements of the tuples. For example, if the input is [(1, 2), (3, 4), (5, 6)], the function should return [1, 3, 5].
Create a Python function that takes a list of floats as input and returns the median of the list.
Write a function that takes a list of lists as input and returns a list of the sums of the sub-lists. For example, if the input is [[1, 2], [3, 4], [5, 6]], the function should return [3, 7, 11].
Write a function that takes a string as input and returns True if the string is a palindrome, otherwise it returns False.
Implement a function that takes a list of numbers as input and returns a new list containing the squares of each number in the input list.
Write a function that takes a dictionary as input and returns a new dictionary where the keys and values are swapped. If a key appears multiple times in the values, only the last occurrence is kept in the new dictionary.
Write a function that takes an integer as input and returns True if the integer is a prime number, otherwise it returns False.
Write a function that takes a list of integers as input and returns the sum of the squares of the even numbers in the list.
Write a function that takes a string as input and returns a dictionary where the keys are the unique characters in the string and the values are their corresponding frequencies.
Write a function that takes a list of lists as input and returns a new list that contains all the elements from the lists, but in reverse order.
Write a function that takes a list of integers as input and returns the maximum value in the list. If the list is empty, the function should return 0.
Write a function that takes a string as input and returns the string with all vowels removed.
Write a function that takes in a list of integers and returns the median of the list.
You are given a string. Write a function to return the string with all vowels removed.
Develop a function that takes in two lists as input and returns True if they contain the same elements, regardless of order, and False otherwise.
You are given a list of numbers. Write a function to find the second largest number in the list.
Write a function that takes in a string and returns the string with all characters in lowercase, except for the first character which should be uppercase.
Write a function called find_median that takes a list of integers as input and returns the median value of the list. If the list has an even number of elements, the function should return the average of the two middle values.
Create a function that takes a string as input and returns the number of vowels in the string. The function should be case-insensitive, meaning it should count both lowercase and uppercase vowels.
Write a function called is_anagram that takes two strings as input and returns True if the strings are anagrams of each other, and False otherwise. An anagram is a word or phrase formed by rearranging the letters of a different word or phrase, typically using all the original letters exactly once.
Create a function that takes a list of strings as input and returns the longest string in the list. If there are multiple strings with the same maximum length, the function can return any one of them.
Write a function called count_substring that takes two strings as input, a main string and a substring, and returns the number of times the substring appears in the main string. The function should be case-sensitive.
Write a Python function that accepts a list of numbers as input and returns the maximum value. For example, if the input is [10, 20, 30, 40], the output should be 40.
Write a Python function that takes a string as input and returns the number of vowels in the string. For example, if the input is "hello", the output should be 2.
Given a list of strings, write a function that returns the longest string in the list. For example, if the input is ["apple", "banana", "cherry"], the output should be "banana".
Write a function that takes a list of integers as input and returns the count of prime numbers in the list. For example, if the input is [2, 4, 5, 7, 8], the output should be 4.
Write a Python function that takes a list of tuples as input, where each tuple contains two integers, and returns a list of tuples with the integers in each tuple added. For example, if the input is [(1, 2), (3, 4), (5, 6)], the output should be [(3,), (7,), (11,)].
Write a function that takes a list of integers as input and returns the list in descending order
Write a function to calculate the area of a circle given its radius as input
Write a Python function to check whether a given string is a palindrome or not
Write a function that takes two lists of integers as input and returns their intersection
Write a function that takes a list of integers as input and returns the second largest number in the list
Create a function that takes in a string and returns the string with all vowels removed.
Write a function that takes a list of integers as input and returns the second largest number in the list. If the list has less than two elements, the function should return None.
Create a class called Rectangle with attributes for the length and width. The class should have a method to calculate and return the area of the rectangle.
Write a function that takes a list of strings as input and returns the longest string in the list. If the list is empty, the function should return an empty string.
Create a function that takes in a dictionary as input and returns a new dictionary with the keys and values swapped. If the input dictionary has duplicate values, the function should return None.
Write a function that takes a list of integers as input and returns the number of elements in the list that are greater than the average of all elements.
You are given a dictionary as input where the keys are names of people and the values are their ages. Write a Python function that returns the name of the oldest person.
Develop a Python function that takes a string as input and returns the string after replacing all vowels with their corresponding uppercase vowels.
Write a function that takes a list of lists as input and returns the sum of all elements in the sublists.
Write a function that takes two strings as input and checks if they are anagrams of each other.
Write a Python function that takes a list of strings as an input and returns the list of strings in alphabetical order, ignoring the case of the strings
Write a program that takes a string as input and returns the number of unique characters in the string
Write a function that takes a list of integers as an input and returns the largest and smallest numbers in the list
Write a Python function that takes a list of lists as an input and returns the total count of all elements in the list of lists
Write a Python program that takes a list of words as input and returns the longest word in the list
You are provided with a string of characters as input. Write a function that takes this string as an argument and returns the count of all vowels in the string
Write a Python function that takes a 2D list as input and returns the maximum value from the entire list
Write a Python function that takes two lists of integers as input and returns a new list containing the intersection of the two lists
Create a function called `most_frequent` that takes a list of strings as input and returns the string that occurs most frequently in the list
Write a Python function that takes a list of integers as input and returns a new list containing the elements at even indices
Write a Python function that takes a list of strings as input and returns the string with the longest length.
Implement a function that takes a 2D list of integers as input and returns the sum of all the elements in the 2D list.
Write a function that takes an integer as input and returns the number of digits in the integer. However, if the integer is negative, return 0.
Create a program that takes a list of integers as input and returns the number of prime numbers in the list.
Write a Python function that takes a string as input and returns the string in reverse order. However, if the string is empty, return the string "empty string".
Write a Python program to calculate the average of a list of integers
Develop a Python function that takes a string as input and returns the string with all vowels removed
Write a Python program that accepts a list of integers as input and returns a new list with all duplicate integers removed
Create a Python function that takes a list of strings as input and returns the longest string in the list
Write a Python program that takes a string as input and returns the string with all characters in uppercase
Develop a Python function that takes a list of integers as input and returns the sum of all the numbers in the list that are multiples of 3
You are given a list of numbers as input. Write a function that takes this list as an argument and returns the second largest number in the list.
You are given a dictionary as input where the keys are strings and the values are lists of integers. Write a function that takes this dictionary as an argument and returns the key with the maximum sum of its corresponding list.
Create a Python function that accepts a date as input in the format 'YYYY-MM-DD' and returns the day of the week (e.g., 'Monday', 'Tuesday', etc.) for that date.
Given a list of tuples, where each tuple contains a string and an integer, write a function that returns a dictionary where the keys are the strings and the values are the sums of the integers corresponding to each string.
Write a Python function to find the last occurrence of a specified element in a list. If the element does not exist in the list, return -1. For example, if the input list is [1, 2, 3, 4, 2] and the element is 2, the function should return 4.
Create a function that takes in a list of integers and checks if the sum of all the elements is even. The function should return True if the sum is even, and False otherwise.
You are given a list of integers and you need to write a Python function that returns a new list that contains only the even numbers. For example, if the input list is [1, 2, 3, 4, 5], the function should return [2, 4].
Create a function that accepts a dictionary as an input and returns a new dictionary where the keys and values are swapped. For example, if the input dictionary is {'a': 1, 'b': 2, 'c': 3}, the function should return {1: 'a', 2: 'b', 3: 'c'}.
Write a class called "Circle" with attributes "radius" and methods "area" and "circumference".
Write a Python function that takes a list of tuples as an argument, where each tuple contains a student's name and their grade. The function should return the average grade of all students
Implement a Python function named is_prime that takes an integer as input and returns True if the number is prime, False otherwise
Create a class Employee with the following properties: employee ID, name, age, salary, and department. The class should also have methods to increase salary and change department
Design a Python function that accepts a list of integers as input and returns the list with all duplicates removed
Write a Python function that takes a list of strings as an argument and returns the string that appears most frequently in the list
Write a Python function that takes a string as input and returns the string with all non-alphanumeric characters removed
You are given a list of integers. Write a function to find the total number of even numbers in the list
Write a Python function that takes two lists as input and returns a new list that contains all elements from both lists, but in a sorted order
You are given a string that contains some words separated by commas. Write a function to count the total number of words in the string
Write a Python function that takes a list of integers as input and returns the sum of the cubes of all numbers in the list
Write a function that takes a string as input and returns the string with all vowels removed, where vowels are a, e, i, o, u, and their uppercase counterparts.
Write a function that takes a list of integers as input and returns a new list containing only the elements that appear an even number of times in the original list.
Given a list of strings, write a function to find the longest string in the list. If there are multiple longest strings, return the first one encountered.
Design a Python function to count the total number of digits in a given list of integers.
Write a function that takes a list of integers as input and returns True if the list contains at least one pair of adjacent duplicates, and False otherwise.
Given a dictionary where the keys are strings and the values are lists of integers, write a Python function that returns a new dictionary with the keys and values swapped. For example, if the input dictionary is {'a': [1, 2, 3], 'b': [4, 5]}, the function should return {1: 'a', 2: 'a', 3: 'a', 4: 'b', 5: 'b'}.
Write a Python program to find the second largest number in a given list of integers. If the list has less than two elements, the function should return None.
Given a list of integers, write a Python function that returns the index of the first occurrence of the maximum value in the list. If the list is empty, the function should return -1.
You are given a string as input, write a Python function to calculate the number of uppercase letters in the string.
Implement a function that takes a list of strings as input and returns the concatenation of all strings in the list.
You are given a list of strings. Write a Python function to check if all strings in the list are in uppercase. The function should return True if all strings are in uppercase, and False otherwise.
Create a Python function that takes an integer as input and returns a list of all its factors. For example, if the input is 12, the function should return [1, 2, 3, 4, 6, 12].
You are given a dictionary with integer keys and string values. Write a Python function to swap the keys and values in the dictionary. The function should return the modified dictionary.
Create a Python function that takes a list of numbers as input and returns the maximum and minimum values in the list. The function should return a tuple containing the maximum and minimum values.
Write a Python function that takes a string as input and returns a new string with all occurrences of a certain word replaced with another word. For example, if the input string is 'hello hello world', the function should replace 'hello' with 'goodbye' and return 'goodbye goodbye world'.
Write a function that takes a list of integers as input and returns the count of all the even numbers in the list. If the list is empty, return 0.
Write a Python function that takes a string as input and returns the string in uppercase if the length of the string is more than 5, otherwise return the string as it is.
Write a function that takes a dictionary as input and returns the sum of all the values in the dictionary. If the dictionary is empty, return 0.
Write a function that takes a list of lists as input and returns the list with the maximum sum of elements. If there are multiple lists with the maximum sum, return the first one.
Write a Python function that takes a string as input and returns the count of all the occurrences of a particular substring in the string.
Write a Python function to print hello world.
Write a Python function that takes a list of integers as input and returns the maximum absolute difference between any two elements in the list.
Create a Python function that takes a string as input and returns a dictionary where the keys are the characters in the string and the values are their frequencies.
Write a Python function to find the first element in a list that is not equal to its index. If no such element exists, return None.
Write a function that takes a list of strings as input and returns a list of all the strings in uppercase.
Create a Python function that takes a list of integers as input and returns a tuple containing the minimum and maximum elements in the list.
Write a Python function that takes a list of lists as input, where each sublist contains two strings. The function should return a set of tuples, where each tuple contains two strings.
Create a Python function that takes a list of dictionaries as input, where each dictionary has a key 'name' and a key 'age'. The function should return a new list of dictionaries, where each dictionary only has the 'name' key.
Write a function that takes a string as input and returns a list of characters that appear more than once in the string.
Write a function that takes a list of integers as input and returns the count of integers that are greater than the average of all the integers in the list.
Create a Python function that accepts a list of strings as input and returns a tuple containing two lists: the first list contains all the strings that start with a vowel, and the second list contains all the strings that do not start with a vowel.
Write a function that takes a dictionary as input and returns a new dictionary where all the keys and values are swapped.
Write a Python function to count the number of strings in a given list that start with "A" or "a".
Write a Python function to find the second smallest number in a given list of integers.
Given a list of strings, write a function that returns the longest string that consists of only alphabetic characters.
Implement a Python function to count the number of elements in a given list that are greater than their next element.
Write a Python function to find the average value of all elements in a given list that are greater than a given threshold value.
Write a function that takes a string as input and returns the longest substring without repeating characters. For example, if the input is "abcabcbb", the output would be "abc".
Create a function that takes a list of strings as input and returns a new list containing only the strings that start with a vowel.
Write a Python function that takes an integer as input and returns the sum of its digits. For example, if the input is 123, the output would be 6.
Create a function that takes a dictionary as an input and returns a new dictionary with only the key-value pairs where the key is an even number. For example, if the input dictionary is {1: 'a', 2: 'b', 3: 'c', 4: 'd'}, the output should be {2: 'b', 4: 'd'}.
Create a Python function that takes a list of integers as input and returns a new list containing the numbers in sorted order. For example, if the input is [5, 2, 8, 1, 9], the output would be [1, 2, 5, 8, 9].
Write a Python function to find the maximum product of three numbers in a given list of integers.
You are given a list of strings. Write a function that returns the string with the maximum length. If there are multiple strings with the same maximum length, return the first one.
Write a Python program to convert a given Roman numeral to an integer. For example, if the input is "XIV", the output should be 14.
You are given a list of tuples, where each tuple contains a student's name and their score. Write a function that returns the name of the student with the highest score. If there's a tie, return the names of all students with the highest score.
Write a Python function to check if a given string contains at least one uppercase letter and one lowercase letter.
Write a function that takes a string as input and returns the string with all vowels removed.
Create a function that takes in a list of integers and returns the number of pairs of integers that add up to a given target sum.
Write a program that takes a list of numbers as input and returns the list in descending order.
Create a function that takes a string as input and returns the longest substring that contains only unique characters.
Write a function that takes a list of strings as input and returns the string with the maximum length.
Write a function that takes a list of integers as input and returns the product of all primes in the list
Write a Python function that takes a list of strings as input and returns a concatenated string with each word separated by a hyphen
Create a function `validate_input` that takes a string as input and returns `True` if the string contains at least one digit, one uppercase letter, and one lowercase letter, and `False` otherwise
Write a function that takes a list of integers as input and returns the difference between the maximum and minimum numbers in the list
Write a Python function that takes a string as input and returns the string with all occurrences of "not " replaced with "not " followed by the word "nice "
Write a Python function that takes a string as input and returns the string with all vowels removed
Implement a Python function that calculates the average of all elements in a given list of integers
Write a function that takes an integer as an input and returns true if the number is odd, false otherwise
You are given a list of integers as an input, write a Python function to find the maximum element in the list
Write a function that takes a list of strings as input and returns the string with the most characters
Write a Python function that takes a 2-dimensional list as an argument and returns a new 2-dimensional list where all the inner lists are sorted in descending order
Create a Python function that takes a string as input and returns the string with all vowels removed
Write a Python function to find the longest common prefix from a list of strings
Implement a Python function that takes a list of integers as an argument and returns the number of pairs of elements that have a difference of 1
Write a Python function that takes a dictionary as an argument and returns a new dictionary where all the keys are strings in lowercase and all the values are multiplied by 2
You are given a list of integers representing student ages. Write a Python function that returns a dictionary where the keys are the ages and the values are the number of students in each age group
Write a function that takes a list of strings as input and returns the string that appears most frequently in the list
Write a function that takes a list of integers as input and returns a new list containing only the even numbers from the original list
You are given a dictionary where the keys are months of the year and the values are lists of daily temperatures. Write a Python function that returns the month with the highest average daily temperature
Write a function that takes a list of integers as input and returns the product of all the numbers in the list
You are given a list of strings as input. Write a function that takes this list as an argument and returns the string with the maximum length. If there are multiple strings with the maximum length, return the last one encountered.
Write a function that takes a list of integers as input and returns True if the list contains at least one even number, and False otherwise.
Implement a function that takes a dictionary as input and returns the sum of all values in the dictionary.
Write a function that takes a string as input and returns a new string where all vowels are removed.
You are given two integers, start and end, as input. Write a function that returns a list of all prime numbers between start and end (inclusive).
Write a function to find the number of times a given substring appears in a string. The function should be case sensitive.
Write a function 'max_value' that takes a list of numbers as input and returns the maximum value in the list. If the list is empty, the function should return None.
Create a Python function that accepts a list of words as input and returns the length of the longest word in the list. If the list is empty, the function should return 0.
Write a function that takes a list of lists as input and returns a new list with all duplicates removed from the inner lists. For example, [[1, 2], [2, 3], [1, 2]] should return [[1, 2], [2, 3]].
Write a function that takes a list of strings as input and returns the concatenated string with all strings separated by a comma and a space. For example, ['apple', 'banana', 'orange'] should return 'apple, banana, orange'.
Write a Python function that takes a list of tuples as input, where each tuple contains two integers. The function should return the count of tuples where the first integer is greater than the second integer
Create a Python function that takes a list of strings as input and returns the longest string in the list. If the list is empty, the function should return 'Empty List'
Write a Python function that takes a list of integers as input and returns a new list that contains only the positive integers from the input list
Create a Python function that takes a list of integers as input and returns the count of prime numbers in the list
Write a Python function that takes a string as input and returns the count of vowels in the string, ignoring case
Write a function to find the minimum value in a list of integers. The function should return the minimum value. If the list is empty, it should return None
Implement a Python function that takes a list of integers as input and returns the number of elements that are divisible by 3
Create a Python function that takes a list of integers as input and returns the product of all even numbers in the list
Write a Python function to find the longest word in a given sentence. If the sentence is empty, the function should return None
Write a Python function that takes a string as input and returns the number of characters that are uppercase
Create a function 'largest_element' that takes a list of integers as input and returns the largest number in the list.
Write a function that takes in two integers ('m' and 'n') as input and returns their greatest common divisor (GCD).
Write a function that takes in a string and returns True if the string is a palindrome, and False otherwise.
Create a function 'word_length' that takes a string as input and returns the average length of all words in the string.
Write a function that takes in a list of integers and returns the number of prime numbers in the list.
You are given a list of strings as an input, write a Python function to sort the list in descending order based on the length of the strings.
Write a function that takes a list of integers as input and returns the list with all duplicates removed.
You are given a dictionary with movie titles as keys and release years as values, write a Python function to find the title of the movie released in a given year.
Write a Python function to find the factorial of a given integer.
You are given a list of tuples, where each tuple contains a student's name and their score, write a Python function to return the name of the student with the highest score.
What is the capital of Argentina
Write a function that takes a list of numbers as input and returns the list with all duplicates removed
Implement a Python program that takes a string as input and returns the string with all digits removed
Write a function that takes a list of tuples as input, where each tuple represents a point (x, y) in a 2D coordinate system. The function should return the point that is closest to the origin (0, 0)
Write a Python program that takes a string as input and returns True if the string is a palindrome (i.e., the string reads the same backwards as forwards) and False otherwise
Write a function that takes two integers as input and returns the greatest common divisor (GCD) of the two numbers
Write a Python function that takes a list of strings as input and returns the longest common prefix among all strings.
Create a Python function that takes a dictionary object as input and returns the sum of all values in the dictionary.
You are given a list of integers as input. Write a Python function that takes this list as an argument and returns the frequency of each integer in the list, excluding the frequencies of the three most frequent integers.
Write a Python function that takes two lists of integers as input, namely 'list1' and 'list2'. Return True if there is at least one common element between the two lists, False otherwise.
Create a Python function that takes a string as input and returns the reversed string, excluding characters at even indices.
Write a Python function that takes a list of lists as input and returns the list with the maximum sum of elements.
You are given a dictionary object 'orders' as input where the keys represent customer IDs and the values represent a list of their orders. Write a Python function that takes this dictionary as an argument and returns the customer ID with the maximum number of orders.
Create a Python function that takes a string 'sentence' as input and returns the number of words in the sentence that contain exactly three characters.
Write a Python function that takes a list of integers 'numbers' as input and returns the count of positive integers that are divisible by 3 but not by 5.
Create a Python function that takes a list of tuples 'coord' as input where each tuple represents a 2D point (x, y). Write a function that takes this list as an argument and returns the point with the maximum Manhattan distance from the origin.
Write a Python function that takes a list of numbers as input and returns a new list that contains the square of each number in the list
Given a string as input, write a Python function that returns True if the string is in uppercase, False otherwise
You are given a set of strings and you need to write a Python function that returns a new set that contains only the strings that have an even number of characters. For example, if the input set is {'apple', 'banana', 'cherry', 'date'}, the function should return {'apple', 'cherry'}
Write a Python program that takes in a list of integers as input and returns the product of all the numbers in the list
Given a list of strings, write a Python function that returns the longest string in the list. If there are multiple longest strings, return any one of them
Write a Python function to count the number of vowels in a given string.
Write a Python function that takes a list of strings as input and returns the list sorted in alphabetical order.
Create a function to find the maximum value in a given list of integers.
Write a Python program to calculate the average of all the numbers in a given list.
Given a list of integers, write a Python function to find the second smallest number.
Write a Python function that accepts a list of floats as input and returns the average value.
Create a Python program that takes a list of tuples, where each tuple contains two integers, as input and returns a new list with the tuples sorted in ascending order.
Write a class called "Book" with attributes "title", "author", and "year_published" and methods "get_title" and "get_author".
Write a Python function that accepts a string as input and returns the string with all vowels removed.
Create a Python function that takes a list of integers as input and returns a list of pairs, where each pair contains a number and its square.
Write a function that takes a dictionary as input and returns a new dictionary where the keys and values are swapped. If the values in the original dictionary are not unique, return an empty dictionary.
Create a function that takes a list of lists as input and returns True if all sublists are of the same length, and False otherwise.
Write a function that takes a string as input and returns the number of times the character "a" appears in the string. The function should be case-insensitive.
Design a Python function that accepts a list of integers as input and returns a new list where all negative numbers are replaced with their absolute values.
Write a function that takes a string as input and returns True if the string contains at least one digit, and False otherwise.
Write a Python function that takes a list of integers as an input and returns the average of all the numbers in the list that are greater than the median of the list
Write a function that takes a dictionary as an input where the keys are dates in the format 'YYYY-MM-DD' and the values are temperatures in Celsius. The function should return a dictionary with the same keys but the values should be temperatures in Fahrenheit
Write a Python function that takes a string as an input and returns True if the string contains at least one palindrome of length greater than 2, and False otherwise
Write a function that takes a list of tuples as an input where each tuple contains a person's name and their age. The function should return a list of tuples but with the names in uppercase and the ages incremented by 1
Write a Python function that takes a list of integers as input and returns a new list containing only the even numbers from the input list
Implement a function that takes in a string as input and returns the string reversed
Write a function that takes a list of lists containing integers as input and returns the maximum sum of any sub-list that contains only positive integers
Write a Python function that takes a list of strings as input and returns the string that is lexicographically smallest
Write a function that takes two strings as input and returns True if one string is a substring of the other, False otherwise
Write a Python function to count the frequency of each element in a given list.
Develop a Python function that takes a string as input and returns the string with all occurrences of a specific substring removed.
Write a Python function to find the maximum and minimum values in a list of numbers.
Implement a function that takes a list of strings as input and returns a new list containing only the strings that start with a specific prefix.
Write a Python function to compute the factorial of a given integer.
Write a Python program to find the maximum value in a given list of integers
Create a Python program that accepts a list of strings and returns the longest string in the list
Write a Python program that accepts two integers as inputs and determines if the first number is divisible by the second number
Write a Python function to count the number of occurrences of a given element in a list
Write a Python program that prints all the numbers between 1 and 100 that can be divided by 3 or 5
Write a function that takes a list of strings as input and returns a new list with all the strings in uppercase
Write a Python program to create a function `count_vowels` that takes a string as input and returns the count of all vowels in the string
Write a Python program to create a function `reverse_string` that takes a string as input and returns the reversed string
Write a Python function to calculate the average of all the elements in a given list
Write a function that takes a string as input and returns the count of vowels in the string.
Implement a function that takes a 3D list of integers as input and returns the average of all the elements in the list.
You are given a list of tuples, where each tuple contains a string and an integer. Write a function to sort the list of tuples based on the integer in each tuple in ascending order.
Write a function that takes a dictionary as input and returns the sum of all the values in the dictionary.
You are given a list of strings. Write a function to find the longest string in the list.
Create a function that takes in a dictionary as input. The function should return a list of all the values in the dictionary
Write a Python function that takes a list of integers as an argument and returns a new list with all the numbers multiplied by 2
Write a Python function to check if a given list of integers is sorted in ascending order. For example, if the input list is [1, 2, 3, 4, 5], the output should be True, because the list is sorted in ascending order
Write a function that takes a list of characters as input and returns the count of all the numeric characters in the list. Consider both integer and float numeric characters
Write a function that takes a string as input and returns the string with all the characters in uppercase and all the spaces removed
Write a function that sum of even numbers in a list.
Write a function that takes a list of integers as input and returns the largest number in the list.
Implement a Python program that takes a list of strings as input and returns a new list with all strings sorted in descending order.
Design a Python function that takes a string as input and returns True if the string is a palindrome, False otherwise.
Develop a Python program that takes a list of integers as input and returns the average of all elements in the list.
Implement a Python function that takes a list of strings as input and returns a single string that is the concatenation of all strings in the input list.
Write a function that takes a list of integers as input and returns the average of all the numbers in the list.
Implement a function that checks if a given year is a leap year or not.
Given a dictionary, write a function to find the key with the maximum value and return it. If there are multiple keys with the same maximum value, return the first one.
Create a Python function that takes a list of strings and returns a new list containing all strings in uppercase.
Write a function that takes a list of numbers as input and returns the sum of all the even numbers in the list.
Write a Python function that takes a string as input and returns the number of vowels in the string. For example, if the input string is 'hello', the function should return 2.
You are given a list of integers and you need to write a Python function that returns a new list that contains the squares of all the numbers in the input list. For example, if the input list is [1, 2, 3, 4], the function should return [1, 4, 9, 16].
Write a Python function that takes a list of integers as input and returns the number of prime numbers in the list. For example, if the input list is [1, 2, 3, 4, 5, 6, 7, 8, 9, 10], the function should return 4.
You are given a string and you need to write a Python function that returns the string with all vowels removed. For example, if the input string is 'hello world', the function should return 'hll wrld'.
Write a Python function that takes a list of integers as input and returns a new list that contains the numbers in the input list in descending order. For example, if the input list is [1, 3, 5, 2, 4], the function should return [5, 4, 3, 2, 1].
Write a Python function that takes a list of strings as input and returns the string with the maximum number of vowels. If there are multiple strings with the same maximum number of vowels, return the first one
Given a list of numbers and a target sum, write a function to find all unique pairs of numbers that sum up to the target. Return these pairs as a list of tuples
Write a Python function that takes a list of dictionaries as input and returns a new dictionary with the count of each unique key. The keys in the input dictionaries can be anything, not just strings
A 3-digit number is called an Armstrong number if it is equal to the sum of the cubes of its digits. For example, 371 is an Armstrong number since 3^3 + 7^3 + 1^3 = 371. Write a Python function that takes an integer as input and returns True if it is an Armstrong number, and False otherwise
Write a Python function that takes a sentence as input and returns a dictionary where the keys are the words in the sentence and the values are their frequencies. The function should ignore the case and consider only alphanumeric characters as part of the words
Write a Python program to count the number of consonants in a given string
You are given a list of strings. Write a Python function that returns a new list containing only the strings that have a length of exactly 5 characters
Write a Python function that takes a list of numbers as input and returns the average of the middle 50% of the numbers when they are sorted in ascending order
Write a function that takes a string as input and returns the string with all occurrences of the word "the" removed
Write a Python function that takes a list of integers as input and returns the sum of the absolute differences between consecutive elements in the list
Implement a Python program that computes the factorial of a given integer.
Create a function tokenize_string that takes a string as input, and returns a list of words in the string.
Write a function named common_elements that takes two lists of integers as input and returns a list of integers that are common to both lists.
Implement a Python function named squares_dict that takes a list of integers as input and returns a dictionary where the keys are the numbers and the values are their squares.
Write a Python function that takes a string as input and returns the frequency of each character in the string
Create a Python function to convert a given binary number to decimal
Write a Python function that takes a list of strings as input and returns the string that appears most frequently
Create a Python function to check if a given string is a palindrome
Write a Python function that takes a list of tuples, where each tuple represents a point in 2D space, and returns the distance between two points that are farthest from each other
Given a list of integers, write a function to return the count of prime numbers in the list.
Write a Python function that takes a string as input and returns the string in uppercase if the string's length is even, otherwise, return the string in lowercase.
Write a program that takes a string as input and returns the frequency of each character in the string. The frequency should be returned as a dictionary where keys are characters and values are their frequencies.
Write a Python function to calculate the factorial of a given number. If the number is less than 0, return an error message.
Given a dictionary as input, write a function to return the sum of all values in the dictionary.
Write a Python function that takes a tuple of characters as input and returns the count of all the vowels in the tuple.
Develop a Python function to calculate the product of all the elements in a given list of numbers.
Design a Python function that takes a set of strings as input and returns the longest string in the set.
Write a Python function that takes a list of lists as input where each sublist contains two elements: a string and an integer. The function should return a new list where each sublist contains the string repeated the number of times specified by the integer.
Write a Python function that takes a dictionary as input where the keys are integers and the values are lists of strings. The function should return a new dictionary where the keys are the same, but the values are the concatenated strings in each list.
Write a Python function that takes a list of strings as input and returns a list of all strings in uppercase.
Given a list of tuples containing two integers each, write a Python program to find the tuple with the maximum sum of its elements.
Develop a Python function that takes a 3D list of integers as input and returns the total number of elements in the list.
Create a Python function that takes a dictionary with strings as keys and integers as values, and returns a new dictionary with the keys and values swapped.
Write a Python program to find the most frequently occurring element in a list.
Write a Python function that takes a list of integers as an input and returns the maximum value in the list
Write a Python function that takes a list of strings as an input and returns the longest string in the list
Create a Python function that takes a list of words as an input and returns a dictionary where the keys are the words and the values are the frequencies of each word
Write a Python function that takes a sentence as an input and returns the number of words in the sentence
Write a function that takes in a string and returns the string with all consonants replaced with a asterisk.
You are given a dictionary with student names as keys and their corresponding grades as values. Write a Python function that returns the names of students who scored the highest grade.
Create a function that takes in a list of strings and returns a new list containing the strings in uppercase.
Write a function that takes in two lists of integers, list1 and list2, and returns a new list containing the elements that are common to both lists.
You are given a string containing a mathematical expression. Write a Python function that evaluates the expression and returns the result.
Write a function that takes a string as input and returns the frequency of each character in the string
Write a function that takes a list of tuples as input and returns a sorted list based on the second element of each tuple
Write a function that takes a list of integers as input and returns the product of all prime numbers in the list
Write a function that takes in a string and returns True if the string is a palindrome, False otherwise
Write a function that takes in two lists of integers as input and returns a list containing all elements that are present in both lists
Write a function that calculates the average of a list of integers. If the list is empty, the function should return 0.
Create a Python function that takes a string as input and returns True if the string contains at least one uppercase letter, and False otherwise.
Write a function that takes a list of strings as input and returns the longest string in the list. If the list is empty, the function should return an empty string.
You are given a list of integers and a target sum. Write a Python function to find all pairs of integers in the list that add up to the target sum.
Create a Python function that takes a string as input and returns the string with all occurrences of a specified substring removed.
Implement a Python function that takes a list of strings as input and returns the list with all strings containing the word "python" moved to the beginning of the list.
Write a function that takes a dictionary as input where the keys are student names and the values are lists of grades. The function should return a new dictionary where the keys are student names and the values are the average grades.
Given a list of integers, write a function that returns the sum of all even numbers in the list. If the list does not contain any even numbers, the function should return 0.
Create a function that takes a string as input and returns the string with all vowels removed.
You are given a list of dictionaries where each dictionary represents a book with keys "title", "author", and "year". Write a function that returns a dictionary where the keys are authors and the values are lists of books written by each author.
Write a function that takes a list of integers as input and returns the maximum difference between any two elements in the list. If the list has less than two elements, return 0.
Create a function that takes a set of words as input and returns the number of words that contain exactly five characters.
Implement a function that takes a list of tuples, where each tuple contains a string and an integer, and returns a new list of tuples with the string and integer reversed.
Write a function that takes a list of integers as input and returns a new list with all duplicate elements removed. The original order of the elements should be preserved.
Create a function that takes a sentence as input and returns the number of words that are palindromes. A palindrome is a word, phrase, number, or other sequence of characters that reads the same forward and backward, ignoring spaces, punctuation, and capitalization.
Create a class called BankAccount with attributes accountNumber and balance. The class should have methods to deposit money, withdraw money and display account details
Write a function that takes a list of strings as input and returns the longest string in the list. If there are multiple strings of the same longest length, return the last one
Implement a Python function to find the maximum sum of a contiguous subarray within a one-dimensional array of numbers
Design a function that takes a list of strings as input and returns a new list containing only the strings that are in uppercase
Create a class called Employee with attributes employeeId, name and department. The class should have methods to display employee details and to calculate the bonus of the employee based on a certain rule
Create a Python function that takes a list of strings as input and returns a new list with all occurrences of words longer than 5 characters removed
Write a function 'count_vowels' that takes a string as input and returns the count of all vowels in the string
Write a Python function that takes a list of integers as input and returns the index of the first occurrence of the number 5 in the list. If 5 is not found, return -1
Create a program that takes a dictionary as input and returns a new dictionary with all keys and values reversed
Write a function 'get_average_age' that takes a list of dictionary objects as input, where each dictionary represents a person with keys 'name' and 'age'. The function should return the average age of all people in the list
Create a function `count_vowels` that takes a string as input and returns the count of all vowels in the string
Write a Python function that takes a list of strings as input and returns a list of strings where each string starts with an uppercase letter
Write a function to check if a given list of integers is sorted in ascending order
Write a Python function that takes two lists of integers as input and returns a list of integers that are common to both lists
Write a Python function that takes a string as input and returns the string with all vowels removed
Write a Python function to find the kth smallest element in an unsorted array of integers.
Develop a Python program to determine whether a given graph is bipartite using the Breadth-First Search (BFS) algorithm.
Given a set of integers, write a function to find the greatest common divisor (GCD) of two numbers using Euclid's algorithm.
Given a binary tree, develop a Python program to find the maximum depth of the tree using recursion.
Develop a Python function that accepts a string as input and returns the count of vowels in the string. For instance, if the input is "Hello World", the output should be 3.
Write a Python function that accepts a list of integers as input, and returns a list of integers that only contains the numbers that are even.
Create a function that takes a list of strings as input where each string is a sentence, and returns a list of the sentences with the most words.
Design a Python function that takes a dictionary as input where the keys are cities and the values are their corresponding populations, and returns a new dictionary where the keys are the populations and the values are lists of cities with that population.
Write a class called "Circle" with attributes "radius" and methods "area" and "circumference".
Write a Python program to find the maximum difference between any two elements in a list, and then print the result
Write a Python function that takes a string as input and returns the string with all vowels removed
Implement a Python function named count_occurrences that takes a list and a target element as input, and returns the number of times the target element appears in the list
Create a Python function that accepts a list of numbers as input and returns a new list where each number is squared
Design a Python function that takes a string as input and returns a new string where all characters are in uppercase
You are given an integer n. Write a function to calculate the sum of all natural numbers up to n. The function should take an integer as an input and return the calculated sum.
Write a Python program that takes a list of integers as an input and returns a new list containing only the even numbers from the original list.
Given a dictionary where the keys are the names of cities and the values are their corresponding populations, write a function `find_largest_city` that takes this dictionary as an input and returns the name of the city with the largest population.
You are given a string that contains only parentheses. Write a function to check if the string is balanced, meaning every opening parenthesis has a corresponding closing parenthesis. The function should return True if the string is balanced and False otherwise.
Write a Python program that takes two integers as input from the user, and then calculates and prints the greatest common divisor (GCD) of the two numbers.
Write a Python function that takes a list of integers as input and returns a new list with all duplicates removed.
Write a function that takes two lists of integers as input and returns their intersection.
You are given a string as an input, write a Python function to check if the string is a palindrome.
Write a function that takes a list of integers as input and returns a tuple containing the minimum and maximum values in the list.
Write a Python function that takes a list of strings as input and returns a new list where all strings are in uppercase.
Write a function that takes a string as input and returns the count of the number of vowels in the string.
Write a Python function to find the maximum absolute difference between any two elements in a given list of integers.
Create a Python program to find the first duplicate in a given list of integers and return its index.
You are given a list of strings. Write a Python function to find the shortest string in the list.
Write a Python function to find the count of all palindromic substrings in a given string.
Write a Python program to find the longest common prefix in a list of strings.
Write a function that takes a list of integers as input and returns the largest number in the list
Create a function that takes a sentence as input and returns the number of words in the sentence
Write a Python function that takes a list of strings as input and returns the longest string in the list
Create a function that takes a dictionary as input where the keys are the names of students and the values are their corresponding ages, and returns the name of the oldest student
Write a Python function that takes a list of tuples as input, where each tuple contains a student's name and their grade, and returns a dictionary where the keys are the student names and the values are their corresponding grades
Write a function that takes a list of integers as input and returns the average of all the prime numbers in the list.
Given a string of parentheses, write a function that returns True if the string is balanced and False otherwise.
Write a function that takes a list of strings as input and returns the longest common prefix among all the strings.
Given a list of integers, write a function that returns the number of sublists that contain at least one duplicate element.
Write a function that takes a list of integers as input and returns True if the list is in ascending order and False otherwise.
Write a function that takes a string as input and returns the string with all vowels removed
Write a program that accepts a positive integer as input and determines whether the number is a perfect square. The program should print 'yes' if the number is a perfect square and 'no' otherwise
Write a Python function that takes a list of strings as input and returns the longest string in the list. If there are multiple longest strings, return the first one
Write a function that takes a list of integers as input and returns the product of all prime numbers in the list
Write a function that takes a string as input and returns the string with all characters reversed
Write a function that takes a matrix as an input and returns a list of all the elements present on its main diagonal.
You are given a list of strings, where each string represents a date in the format "YYYY-MM-DD". Write a Python program that takes this list as an input and returns the earliest date.
Implement a Python function that takes two integers as input, representing the current hour and minute of the day, and returns the time 15 minutes from the given time.
Create a Python program to find the maximum path sum from the root to any leaf node in a given binary tree.
Write a Python function that takes a dictionary as an input, where keys are strings representing person names and values are lists of strings representing their phone numbers. The function should return a new dictionary where the keys are phone numbers and the values are lists of person names.
Write a function that accepts a list of strings and returns the string with the longest length
Create a program that takes a list of integers as input and returns the sum of all even numbers in the list
You are given a list of dictionary objects. Write a function to find the dictionary object with the shortest string value for the key 'name'
Write a function that takes a list of integers as input and returns the count of all prime numbers in the list
Create a Python function that accepts a list of strings and returns a new list with all strings converted to uppercase
Design a Python script that takes a list of integers as input and returns the count of even numbers in the list.
Write a Python function to find the first duplicate element in a list. If no duplicate is found, the function should return -1.
Develop a Python program to calculate the sum of digits of a given number. For instance, if the input number is 123, the output should be 6.
Create a Python class for a Bank Account with attributes account_number, account_name, and balance. The class should have methods to deposit and withdraw amounts.
Create a Python function that takes a string as input and returns the string in reverse order. For example, if the input string is "hello", the output should be "olleh".
Write a Python function that takes a list of strings as input and returns the longest string in the list
Create a function that takes a binary tree as input and returns the depth of the tree
Given a list of integers, write a function to find the largest subarray sum
Write a Python function that takes a string as input and returns a new string with all vowels removed
Write a Python function that takes a list of dictionaries as input and returns a new list containing only the dictionaries that have a specific key
Write a function that takes a list of floats as input and returns the average of all numbers in the list that are greater than a certain threshold value. The function should also return None if the list is empty.
Create a Python function that takes a dictionary where the keys are names of people and the values are their ages, and returns the name of the oldest person in the dictionary. If the dictionary is empty, the function should return None.
Write a Python program to create a class for a Circle with attributes center and radius. The class should have methods to calculate the circumference and area of the circle.
Write a function that takes a list of strings as input and returns a new list where all the strings have been converted to uppercase. If the list is empty, the function should return an empty list.
Write a function that takes a list of integers as input and returns the product of all numbers in the list that are perfect squares. The function should return 1 if the list is empty.
Create a Python function that takes a dictionary as input and returns a new dictionary that contains only the key-value pairs where the value is greater than 10.
Write a Python function that takes a list of strings as input and returns a new list that contains only the strings that have a length of more than 5 characters.
Write a function that takes two strings as input and returns a boolean indicating whether the second string is a substring of the first string.
Create a Python function that takes a list of integers as input and returns a new list that contains the squares of all the numbers in the original list.
Write a Python function that takes a string as input and returns a new string where all occurrences of the word "the" are replaced with "a".
Write a Python function that takes a list of strings as input and returns the length of the shortest string in the list.
Implement a function to check if a given integer is a prime number or not.
Write a function that takes a dictionary as input and returns the sum of all the values in the dictionary.
Write a function that takes a list of integers as input and returns True if all the numbers in the list are positive, False otherwise.
Write a function that takes a string as input and returns the string with all vowels removed.
Develop a function that takes a string input and returns a reversed string. For instance, if the input is "hello", the output should be "olleh".
Create a function that accepts a list of numbers as input and returns the list sorted in descending order.
Write a Python function to convert an integer number to its Roman numeral equivalent. For instance, the integer 4 should be converted to IV.
Develop a program that takes two strings as input and returns the number of times the second string appears within the first string.
Create a class that represents a Student. The class should have attributes for student name, student grade, and student ID. The class should also have methods for updating the student grade and printing the student information.
Write a Python function to find the maximum value in a list of integers.
Write a Python function to determine if all elements in a list are unique.
Write a Python function to reverse the order of words in a given sentence.
Write a Python function to convert a given binary number to decimal.
Write a Python function to find all permutations of a given string.
Write a Python function to check if a given year is a leap year or not.
Write a Python function to find the average of a list of numbers.
Write a Python function that takes a string as input and returns the string with all vowels removed. For example, if the input is "hello world", the output would be "hll wrld"
Given a list of dictionaries, write a function that returns the sum of all values in the dictionaries. For example, if the input is [{"a": 1, "b": 2}, {"c": 3, "d": 4}], the output would be 10
Write a function to check if a given string is a palindrome. A palindrome is a string that reads the same backward as forward
Write a Python function that takes two lists of integers as input and returns a new list that contains the elements present in either of the lists. For example, if the input lists are [1, 2, 3] and [4, 5, 6], the output should be [1, 2, 3, 4, 5, 6]
Given a list of lists, write a function that returns the maximum sum of elements in any sub-list. For example, if the input is [[1, 2, 3], [4, 5], [6, 7, 8, 9]], the output would be 30
Write a Python function that takes a dictionary as input and returns True if all the key-value pairs have the same key-value type, False otherwise
Develop a Python program to find the longest substring in a given string without repeating characters and return its length
Write a function that takes a list of lists as input and returns True if all sublists have the same length, False otherwise
Given a string `s` consisting of alphabets, write a Python function to return the frequency of the most frequently occurring character in `s`. For example, if `s = 'hello world'`, the frequency of the most frequently occurring character is `3` because `l` occurs three times
Write a Python function that takes a list of strings as input and returns the longest string in the list
Create a Python function that calculates the factorial of a given integer.
Write a program that takes in a string and returns the string with all occurrences of the word "the" removed, regardless of case.
Given a list of strings, return the longest string in the list. If there are multiple longest strings, return the first one.
Write a program that takes in a list of integers and returns the sum of all the even numbers in the list.
Create a Python function that takes in a list of integers and returns True if the list is in ascending order, and False otherwise.
Write a function that takes in a list of floating-point numbers as input and returns the average value, rounded to two decimal places.
Write a function called count_vowels that takes a string as input and returns the count of vowels in the string.
Write a function that takes in a list of tuples, where each tuple represents a point in 2D space, and returns the point that is closest to the origin.
Write a function that takes in a dictionary as input and returns a new dictionary where the keys and values are swapped.
Write a function that takes in a string as input and returns True if the string is a palindrome, False otherwise.
Write a function that takes a list of integers as input and returns the frequency of each integer in the list, where the frequency is calculated as the number of times each integer appears in the list.
You are given a list of strings and you need to write a Python function that returns a new list where the order of the strings is reversed.
Write a function that takes two lists of integers as input and returns True if the lists contain the same elements, regardless of their order, and False otherwise.
Given a dictionary where the keys are strings and the values are lists of integers, write a function to return the key with the longest list of integers.
Write a function that takes a list of integers as input and returns the maximum sum that can be obtained from a contiguous subsequence of the list.
Write a Python function that takes a string as input and returns the number of vowels in the string.
Write a function that takes a list of integers as input and returns the maximum difference between any two elements in the list.
Write a Python program that takes a list of integers as input and returns a new list containing only the elements that appear at least twice.
Write a function that takes a list of strings as input and returns the longest string in the list. If there are multiple longest strings, return the first one.
Write a Python function that takes a dictionary as input and returns a new dictionary with the keys and values swapped.
Write a Python function that takes a list of strings as input and returns a list of strings with duplicate elements removed, preserving the original order.
Write a Python program to find the middle element of a singly linked list. If the linked list has an even number of elements, the function should return the two middle elements.
Write a Python function that takes a string as input and returns the string with all vowels removed.
You are given a list of integers and you need to write a Python function that returns the number of pairs of integers in the list that have a difference of 1.
Write a Python program to create a 2D list from a list of lists, where each inner list contains a string and an integer. The 2D list should be sorted based on the integer values in descending order.
Write a Python function that takes a list of tuples as input, where each tuple contains a student's name and their grade, and returns a dictionary where the keys are the student names and the values are their corresponding grades
Create a function that accepts a list of integers as input and returns the sum of all prime numbers in the list
Write a Python function that takes a dictionary as input and returns a new dictionary with all keys and values swapped
Write a program that takes in a string as input and returns the number of palindromes in the string
Write a Python function that takes a list of strings as input and returns a new list with all strings sorted in alphabetical order
Write a function that takes a list of strings as input and returns the string that has the maximum length. For example, if the input is ["apple", "banana", "cherry", "date"], the output would be "banana".
Create a Python program that takes a list of integers as input and returns the count of all prime numbers in the list.
Write a function that takes a list of lists as input and returns a new list where each sublist has been reversed. For example, if the input is [[1, 2, 3], [4, 5, 6], [7, 8, 9]], the output would be [[3, 2, 1], [6, 5, 4], [9, 8, 7]].
Implement a Python function that takes a string as input and returns True if the string is a valid email address and False otherwise.
Write a function that takes a list of integers as input and returns a new list containing only the numbers that are greater than the average of the list.
Write a function that takes a list of integers as input and returns a list containing each integer multiplied by a given factor.
Create a Python function to return the longest common prefix among a list of strings.
You need to write a Python function that takes a list of tuples as input and returns a list containing only the tuples with even length.
Write a function that takes a list of integers as input and returns a count of numbers that are greater than the average of the input list.
Create a Python function that takes a list of strings as input and returns a set containing all unique substrings of a given length from the input strings.
Write a Python function that takes a list of strings as input and returns the number of strings in the list that have more than 5 characters.
Define a function `calculate_lcm` that takes two integers as an input and returns the least common multiple of the two numbers.
Write a Python function that takes a list of tuples as an input where each tuple contains two integers and returns the list of tuples sorted in ascending order based on the sum of the integers in each tuple.
Write a Python function that takes a list of integers as input and returns the difference between the maximum and minimum values in the list.
Write a Python function that takes a string as an input and returns the string with all vowels removed.
Write a Python function that takes a list of words as input and returns the length of the longest word in the list
Given a list of integers, write a Python program that returns a new list containing only the squares of the numbers in the input list
Write a function that takes in a dictionary as input and returns the key with the maximum value
Write a Python program to check whether a given year is a leap year or not
Given a string, write a Python function to find the number of vowels in the string
Write a Python program that takes in a string and returns true if the string is a palindrome, false otherwise
Write a function that takes in a list of integers and returns the second largest number in the list. If there are duplicates, return the second largest distinct number. If there are less than two numbers in the list, return None
Given a dictionary where the keys are names and the values are ages, write a function that returns a list of names of people who are above the age of 18
Write a function that takes in a string and returns true if the string contains at least one uppercase letter, false otherwise
Write a class called "Circle" with attributes "radius" and methods "area" and "circumference"
Write a Python function to find and return the common elements in two lists. If there are no common elements, the function should return an empty list
Given a list of integers, write a function to find the second largest number in the list. If the list has less than two elements, the function should return None
Write a Python program to check if a given string contains only digits, ignoring the case sensitivity
Design a Python function that takes a list of lists as input, where each sublist contains two elements. The function should return the sublist with the highest sum of its elements
Write a Python function to remove all duplicates from a list, maintaining the original order of elements
You are given a list of integers and a target integer. Write a function to find the pair of integers in the list that add up to the target and return their indices in the list. If there is no such pair, return 'None'.
Create a function 'remove_duplicates' that takes a list as input and returns a new list with duplicates removed. The original order of the elements must be preserved.
Write a function that takes a list of strings as input and returns the longest string in the list. If there are multiple strings with the same maximum length, return the first one.
You are given a list of integers. Write a function to find the first integer that appears an odd number of times in the list and return it. If no such integer exists, return 'None'.
Create a function 'rotate_matrix' that takes a 2D list as input, rotates it 90 degrees clockwise, and returns the rotated matrix.
Write a function to find the first non-repeating character in a given string. The function should return the character if found, else return None.
Write a function to find the median of a list of integers. If the list has an even number of elements, the function should return the average of the two middle elements.
Write a function `filter_even_numbers` that takes a list of integers as input and returns a new list containing only the even numbers from the original list.
Write a function to find the length of the longest substring without repeating characters in a given string.
Write a function `get common_elements` that takes two lists as input and returns a list of elements that are common to both lists.
Write a function to find the maximum sum of a subarray within a given array of integers.
Create a Python function to find the maximum sum of a contiguous subarray within a one-dimensional array of numbers. If the array is empty, return 0
Write a Python program to print the first non-repeating character in a given string. If no such character exists, print 'None'
Implement a function that takes a list of strings as input and returns the longest string in the list. If the list is empty, return an empty string
Create a Python program to check if a given string contains only digits. If it does, print 'True', otherwise print 'False'
Write a function to find the first occurrence of a given substring within a string. If the substring is not found, return -1
Given a list of integers, write a function that returns the second-largest number in the list.
Write a program that takes a string as input and returns the string with all vowels removed.
Implement a Python program that takes a list of names as input and returns the list sorted in alphabetical order.
Write a Python function to calculate the number of days between two given dates.
Write a Python program that prints all the permutations of a given string.
Create a function that takes a string as input and returns True if it starts with a vowel, False otherwise
Define a function that takes a list of integers and returns the average of the numbers
Write a function to count the number of occurrences of a specific character in a given string
Develop a Python function that takes a list of tuples, where each tuple contains a student's name and grade, and returns the student with the highest grade
Write a Python function to check if all elements in a given list are unique
Given a dictionary where keys are student names and values are their grades, write a Python function to find the student with the highest grade.
Write a Python function that takes a list of numbers as input and returns the second largest number in the list.
Given a binary tree, write a function that returns the sum of all the nodes in the tree.
Write a Python function to find all occurrences of a given word in a list of strings.
Given a list of strings, write a function to count the number of strings that start with a vowel.
Write a function that takes a list of tuples to find the maximum value in a list. For example, .
Implement a Python function that takes a list of strings to return True if the input is a palindrome in a string. For example, .
Create a function that takes two strings as input to return True if the strings are anagrams in an integer. For example, .
Write a function that takes a list of integers to visit each location in sequence in a tuple. For example, .
Implement a Python function that takes a list of arrays to calculate the total distance in an array. For example, .
Create a program that asks the user to input a date in the format 'dd/mm/yyyy' and then checks if the date is valid. If it is, the program should print 'Valid', otherwise it should print 'Invalid'.
Write a function that takes a string as input and returns the number of uppercase letters in the string.
Create a function that takes a list of integers as input and returns the average of all the even numbers in the list.
Write a class called "Rectangle" with two attributes "length" and "width" and two methods "area" and "perimeter".
Implement a Python function that takes a string as input and returns the string with all vowels removed.
Write a Python function that takes a dictionary as input and returns the sum of all values in the dictionary
Create a Python class that represents a Person. The class should have attributes for name, age, and occupation. The class should also have methods for changing occupation and increasing age by a certain number of years
Write a Python function that takes a string as input and returns a new string with all vowels removed
Write a Python function that takes a list of strings as input and returns the longest string in the list
Create a Python function that takes a list of integers as input and returns the product of all even numbers in the list
Write a function that takes a list of usernames. If the list contains less than five usernames, add the default username "user" until it reaches five. Otherwise, remove excess usernames.
Write a function to count the number of prime numbers less than or equal to a given number n.
Implement a function `extract_vowels` that takes a string as input and returns a new string containing only the vowels extracted from the original string.
Write a function to find the first duplicate in a given list. If there is no duplicate, return -1.
Write a function to rotate a given matrix by 90 degrees clockwise. The matrix can be represented as a 2D list of numbers.
Write a function to check if a given string is a palindrome, ignoring any non-alphanumeric characters.
Write a function that takes a list of strings as input and returns a new list with all strings converted to uppercase
Create a Python function that takes a list of integers and a target sum as input, and returns True if there exists a pair of integers in the list that add up to the target sum, and False otherwise
Write a function that takes a dictionary as input and returns a new dictionary with all keys and values swapped
Write a function that takes a string as input and returns the string with all occurrences of a specified character removed
Create a Python function that takes a list of integers as input and returns the longest contiguous subsequence of integers that sums up to zero
Write a function that takes a list of strings as input and returns the number of strings that contain the character 'e'.
Implement a Python function that takes a list of integers as input and returns the product of all the prime numbers in the list.
Write a Python program that takes a string as an input and returns the string with all occurrences of a specified substring removed.
Write a function that takes a list of integers as input and returns the sum of the cubes of all the numbers in the list that are divisible by 3.
Write a Python function that takes a positive integer as input and returns the number of its divisors including 1 and itself.
Given a list of words, write a function to find the longest common prefix among all the words in the list
Write a Python function that takes a string as input and returns the index of the first unique character in the string
Given a list of integers, write a function to find the maximum sum of a contiguous subarray within the list
Write a function that takes a list of strings as input and returns the number of strings that start with a vowel
Given a list of integers, write a function to find the number of elements that are in the correct order, i.e., each element is less than or equal to the next element
Write a Python function to calculate the average of all elements in a given list of integers.
Design a function that takes a string as input and returns the string with all vowels removed.
Write a function that takes a list of integers as input and returns the maximum and minimum values in the list.
Create a Python function that takes a string as input and checks if the string is a palindrome (reads the same backwards as forwards).
Write a function that takes a list of strings as input and returns a new list containing only the strings that start with a specific prefix.
Write a function that takes a list of integers as input and returns the index of the first occurrence of the smallest number in the list.
Write a Python function to calculate the average of a list of integers. The function should return the average as a floating-point number.
Implement a class called `Rectangle` with attributes `length` and `width`, and methods `area` and `perimeter`. The `area` method should return the area of the rectangle, and the `perimeter` method should return the perimeter of the rectangle.
Write a function to determine if a given string is a palindrome. A palindrome is a string that reads the same forward and backward.
Write a Python function to calculate the factorial of a given integer. The function should return the factorial as an integer.
Write a function to count the occurrences of each character in a given string. The function should return a dictionary where the keys are the characters and the values are the counts.
Write a Python function that calculates the sum of the elements of each sublist in a given list of lists
Implement a Python function that checks if a given string is a palindrome or not
Develop a Python function that accepts a list of integers and returns a new list containing only the even numbers
Write a Python function that takes a list of strings as input and returns a new list containing only the strings that start with an uppercase letter
Implement a Python function that converts a given binary number to decimal
Write a Python function that calculates the sum of the elements of each sublist in a given list of lists
Implement a Python function that checks if a given string is a palindrome or not
Develop a Python function that accepts a list of integers and returns a new list containing only the even numbers
Write a Python function that takes a list of strings as input and returns a new list containing only the strings that start with an uppercase letter
Implement a Python function that converts a given binary number to decimal
Write a Python function that takes a string as input and returns the string with all consonants removed
Implement a Python program that takes a list of integers as input and returns a list containing only the prime numbers from the input list
Write a Python program to create a dictionary from a list of strings where the keys are the strings themselves and the values are the length of the strings. If the list is empty, the function should return an empty dictionary
Develop a Python function to calculate the median value of a list of numbers
Given a list of strings in Python, write a function to return a list of strings where each string is in uppercase
Write a function that takes a string as input and returns the string in uppercase.
Write a function that takes in a list of integers and returns a new list with all duplicate elements removed.
Write a function that takes in two integers as input and returns their greatest common divisor.
Write a function that takes in a list of strings and returns the string with the maximum length.
Write a function that takes in an integer as input and returns a boolean indicating whether the number is a prime number or not.
Write a Python function to find the common elements between two lists of integers without using the set data type.
Given a string containing only alphabets, write a Python program to find the frequency of each alphabet in the string.
Write a function to find the maximum depth of a nested list. The depth of a nested list is defined as the maximum number of nested lists.
Given a list of strings, write a Python program to find the longest string that contains at least one digit.
Write a function to find the first element in a sorted list of integers that is greater than the previous element by more than 1.
Implement a function that checks if a given string is a palindrome. If the string is a palindrome, the function should return True, otherwise, it should return False
You need to write a Python function that takes a list of strings as input and returns the string with the maximum length. If the list is empty, the function should return empty string
Write a Python program to implement a binary search algorithm on a sorted list of integers
Create a function that takes a list of integers as input and returns a new list that contains the square of each element in the input list
You need to write a Python function that takes two lists of integers as input and returns True if they have at least one common element, and False otherwise
Write a function that takes two lists of integers as input and returns a new list that contains only the elements that are present in both lists.
Create a Python function that takes a string as input and returns the string with all vowels removed.
Write a function that calculates the sum of the digits of a given integer.
You are given a dictionary where the keys are names of students and the values are their corresponding ages. Write a Python function that returns the name of the oldest student.
Write a function that takes a list of integers as input and returns True if the list is in ascending order, False otherwise.
Write a Python program to determine whether a given string is a palindrome or not.
Write a function that takes a list of strings as input and returns the list sorted in alphabetical order, ignoring the case of the strings.
Write a Python function that takes a list of integers as input and returns the number of occurrences of the majority element, which is the element that occurs more than n/2 times, where n is the size of the list.
Write a script that takes a list of strings as input and returns a single string that is the concatenation of all the strings in the input list.
Write a Python function that takes a string as input and returns the string with all digits removed.
Write a function that takes two lists of integers as input and returns a single list containing all unique elements from both lists.
Create a function that takes a string as input and returns the string with all lowercase letters converted to uppercase.
Write a function that takes a 2D list of integers as input and returns the sum of all elements in the 2D list.
Implement a Python function to find the longest common prefix among a list of strings.
Write a function that takes a dictionary as input and returns a new dictionary with only the key-value pairs where the key is an even number.
Write a Python program that calculates the average of a list of numbers.
Create a function that takes a list of integers as input and returns the count of even numbers in the list.
Develop a Python program that takes a string as input and returns the string in reverse order.
Write a function that takes a list of tuples as input, where each tuple contains two integers, and returns the tuple with the maximum sum of its elements.
Create a program that takes a list of dictionary objects as input, where each dictionary object contains a 'name' key and an 'age' key, and returns the dictionary object with the highest 'age' value.
Write a Python function that accepts a month and a year as inputs and returns the number of days in that month. The function should consider leap years when calculating the number of days
Create a Python program that prints the first 10 prime numbers
Write a Python function that takes a list of strings as input and returns the longest string in the list
Write a Python function that takes a list of integers as input and returns the second smallest number in the list
Write a Python program to convert a given temperature from Celsius to Fahrenheit
Write a Python function to count the number of occurrences of a specific character in a given string.
Given a list of integers, write a function that returns the count of even numbers and the count of odd numbers in the list.
Given a set of integers, write a function that returns the average of the integers in the set.
Write a Python function to count the number of vowels in a given string, ignoring case sensitivity.
Create a Python function that takes a list of strings as input and returns a new list with all strings sorted in descending order. For example, if the input list is ["apple", "banana", "cherry"], the output should be ["cherry", "banana", "apple"].
Write a function that takes a list of integers as input and returns True if the list contains at least one even number, and False otherwise.
Given a dictionary where the keys are movie titles and the values are ratings, write a function that returns a new dictionary with all ratings increased by 1. For example, if the input is {"The Shawshank Redemption": 8, "The Godfather": 9, "The Dark Knight": 8}, the output would be {"The Shawshank Redemption": 9, "The Godfather": 10, "The Dark Knight": 9}.
Write a Python program that takes a string as input and returns a new string with all vowels removed. For example, if the input is "hello world", the output should be "hll wrld".
Write a class called "Circle" with attributes "radius" and methods "area" and "circumference".
Write a Python function that takes a list of integers as input and returns a new list containing only the even numbers from the input list
Create a function that accepts a string as input and returns the count of the number of times the character 'a' appears in the string
Write a Python program to check if a given string is a substring of another string, ignoring the case
Design a Python function that takes two strings as input and returns True if they are anagrams of each other, False otherwise
Write a function that takes a list of strings as input and returns the list of strings in reverse order, ignoring the case of the strings
Write a Python program to count the number of words in a given sentence.
Implement a function to find the first duplicate in a given list of integers.
Write a function that takes a string as input and returns the string reversed.
You are given a dictionary where the keys are names of countries and the values are their corresponding capitals. Write a function `find_capital` that takes this dictionary and a country name as inputs and returns the capital of the country.
Write a function to find the first common element in two given lists of integers.
Write a Python function that takes a list of integers as input and returns the average of the list.
Create a Python program that takes a string as input and returns the count of all occurrences of a given substring in the string.
Implement a function that takes a list of strings as input and returns the longest string in the list. If there are multiple longest strings, return the first one.
Write a function that takes a list of integers as input and returns True if the list is in sorted order, False otherwise.
Create a Python program that takes a string as input and returns a new string where the first and last characters of the input string are swapped.
Create a Python function to count the number of occurrences of a specific character in a given string
Write a Python function that takes a list of strings as an input and returns the string with the maximum length
Write a function to find the maximum value in a binary search tree
Given a string `s` and an integer `k`, return the string after removing `k` characters such that the resulting string is the lexicographically smallest possible
Implement a function that takes a list of integers and returns a new list containing only the elements that are greater than the median of the original list
Write a Python function to find the maximum value in a list of integers.
Write a program that takes a list of lists as input and returns a single list with all elements from the input lists in the same order.
Create a Python function that takes a string as input and returns the string in reverse order.
Write a class called "Circle" with attributes "radius" and methods "area" and "circumference".
Write a Python program that creates a dictionary from a list of strings, where each string is a key and its value is the length of the string.
Create a function that takes a string as an input and returns True if the string contains at least one uppercase letter, False otherwise
Implement a Python program that takes a list of integers as an input and returns the maximum number in the list
Write a Python function that takes two lists of integers as inputs and returns a list that contains all elements that are present in both lists
Create a class called Rectangle that has attributes for the length and width. The class should have methods to calculate the area and perimeter of the rectangle
Write a Python function that takes a string as an input and returns the frequency of each character in the string
You need to write a Python function that takes a list of strings as input and returns a new list that contains only the strings that are longer than a specified length. For example, if the input list is ['hello', 'world', 'abc', 'def'] and the specified length is 3, the function should return ['hello', 'world'].
Given a list of integers, write a function to find the second largest number in the list. If there is no second largest number (i.e., all numbers are the same), the function should return None.
Write a Python program that calculates the frequency of each word in a given string. The output should be a dictionary where the keys are the words and the values are their frequencies. For example, if the input string is "hello world hello", the output should be {'hello': 2, 'world': 1}.
You need to write a Python function that takes a list of lists as input and returns a new list that contains only the lists that contain at least one element that is greater than a specified threshold. For example, if the input list is [[1, 2, 3], [4, 5, 6], [7, 8, 9], [10, 11, 12]] and the specified threshold is 5, the function should return [[4, 5, 6], [7, 8, 9], [10, 11, 12]].
Write a Python function that takes a list of strings as input and returns the string with the maximum length
Create a function `count_vowels` that takes a string as input and returns the total count of vowels in the string
Write a Python function that takes a dictionary as input and returns the key with the maximum value
Write a function to check if a given number is a prime number
Write a Python function that takes a list of integers as input and returns a new list with all duplicates removed
Create a Python function to calculate the square of all numbers in a given list and returns a new list with the squares.
Write a Python program to create a function that determines whether a given string is a palindrome or not.
Implement a Python function that takes a list of strings as input and returns the count of all strings that start with a specific substring.
Write a Python function that takes a list of integers and returns the product of all numbers in the list.
Create a Python function to count the number of vowels in a given string.
Create a Python function that takes a list of strings and returns a new list containing the length of each string.
Write a function that takes a list of integers as input and returns True if the list contains at least three consecutive even numbers, and False otherwise.
Write a Python function to find the first duplicate in an array of integers, or -1 if no duplicate exists.
Write a function that calculates the sum of the cubes of the first n natural numbers where n is given as an input.
Create a Python function that takes a list of lists of integers and returns a new list containing the maximum value in each sublist.
Create a Python function that accepts a list of lists as input and returns a flatten list.
Write a Python function that takes a list of integers as input and returns the count of even numbers.
Write a Python function to find the maximum occurring integer in a given list.
Write a Python function that takes a list of strings as input and returns the longest string.
Create a Python function that accepts a string as input and returns the string with all vowels removed.
Write a Python program that takes a list of numbers as input and returns the maximum number in the list. The maximum number should be returned without any decimal places
Write a function that takes a list of strings and returns a new list with all strings converted to uppercase
Write a program to calculate the factorial of a given number. The program should take a number as input and return its factorial
Write a Python function that takes a string as input and returns the number of words in the string
Write a program that takes a list of numbers as input and returns a new list with all numbers multiplied by 2
Write a function that takes a list of strings as input and returns a new list that contains all the strings that start with a vowel
Write a function that takes a positive integer as input and returns the sum of all its factors
Write a function that takes a list of numbers as input and returns the count of all the prime numbers in the list
Write a function that takes a string as input and returns the number of times the letter "e" appears in the string
Write a function that takes a list of integers as input and returns a new list that contains only the integers that are divisible by 3 or 5
Write a function to find the longest common prefix in a given array of strings. If no common prefix is found, return an empty string.
Create a Python function that takes two lists of integers as input and returns a list of their intersection (i.e., the elements that are present in both lists).
Write a program to create a dictionary where the keys are English words and the values are their respective French translations.
Define a function that takes a string as input and returns the number of vowels in the string.
Write a Python function that takes a list of strings as input and returns the longest string in the list.
Write a Python function that takes a set of coordinates as input and returns the distance between the two points
Implement a Python program that takes a list of words as input and returns the words that are anagrams of each other
Given a string, write a Python function that returns the number of times each character appears in the string
Write a Python program that takes a list of integers as input and returns the maximum value and its index in the list
Write a Python function that takes a list of strings as input and returns the longest string in the list
Write a Python function that takes a dictionary as input and returns a new dictionary that contains all the key-value pairs from the original dictionary, but with the keys and values reversed
Implement a Python function that accepts a list of strings as input and returns a new list containing only the strings that start with a vowel
Write a Python program that takes a list of integers as input and returns the number of elements that are greater than the average value of the list
Write a Python function to find the longest common prefix among a list of strings
Implement a Python function that accepts a list of lists as input and returns a new list containing the flattened elements from the original list of lists
Create a function that takes a list of integers as input and returns the count of odd numbers in the list, ignoring any non-integer values
Write a Python program to calculate the cost of an item after applying a discount. The function should take the original price and the discount percentage as inputs
Write a function to check if a given string is a palindrome or not, ignoring any spaces and case sensitivity
Given a list of strings, write a function that returns a new list with all the strings in uppercase
Write a function to calculate the sum of squares of first n natural numbers, where n is a positive integer
Create a function that takes a string as input and returns a new string with all the vowels removed.
Write a function that takes a list of integers as input and returns a new list that contains only the even numbers.
Write a Python function to calculate the average of all the elements in a given list.
Write a Python program to implement a simple calculator that can perform addition, subtraction, multiplication, and division operations.
Write a Python function that takes a dictionary as input and returns a new dictionary with the keys and values swapped.
You are given a list of integers and you need to write a Python function that returns a new list that contains all the numbers that are divisible by 3. For example, if the input list is [10, 15, 20, 24, 30], the function should return [15, 24, 30].
Create a class Employee with the following properties: employee ID, job title, salary. The class should also have a method to increase the salary by a certain percentage.
Write a function that takes a list of integers as input and returns the list with all the duplicate elements removed.
Write a Python function that calculates the average of all the numbers in a given list.
Develop a Python program that takes a string as input and returns the string with all the words in uppercase.
Write a Python function that takes a string as input and returns True if the string consists entirely of alphanumeric characters (i.e., letters or numbers), and False otherwise
Given a list of integers, write a function that returns the second largest number in the list, or None if the list contains less than two distinct numbers
Write a Python function that takes a dictionary as input and returns the average value of all keys in the dictionary, or None if the dictionary is empty
Given a string, write a function to capitalize the first letter of each word in the string and return the resulting string
Write a Python function that takes a list of strings as input and returns a dictionary where each key is a string from the list and the corresponding value is the number of times the string appears in the list
Write a Python function that takes in a dictionary and returns a new dictionary with all keys in uppercase. For example, if the input dictionary is {'a': 1, 'b': 2, 'c': 3}, the function should return {'A': 1, 'B': 2, 'C': 3}.
Write a Python program that reads a list of names from a text file and returns the shortest name.
Create a function that takes a list of strings as input and returns a list of strings with all punctuation removed.
Write a Python function that takes in a string and returns the number of times the substring 'abc' appears in the string.
Write a function that takes a list of integers as input and returns a new list with all duplicate integers removed. For example, if the input list is [1, 2, 2, 3, 4, 4, 5], the function should return [1, 2, 3, 4, 5].
Write a Python function to count the number of vowels in a given string
Create a function get_largest that takes a list of integers as input and returns the largest integer in the list
Write a function that takes two lists of integers as input and returns their intersection
Write a Python function to reverse the order of the words in a given sentence
Create a function that takes a string and an integer as input and returns the string repeated the given number of times
Write a function 'find_prime_numbers' that takes a list of integers as input and returns a new list containing only the prime numbers from the input list
Write a Python function to check if a given string is a palindrome, ignoring case sensitivity and non-alphanumeric characters
Create a function that takes a list of strings as input and returns the longest common prefix among all the strings in the list
Implement a function that takes two lists of integers as input and returns a new list that contains only the elements that are present in both input lists
Write a function that takes a string and a character as input and returns the index of the first occurrence of the character in the string, or -1 if the character is not found
Write a Python function that takes a string as input and returns True if the string contains at least one uppercase letter, False otherwise
You are given a list of integers and you need to write a Python function that returns the number of elements in the list that are greater than the mean of the list
Write a Python program to calculate the total number of digits in a given positive integer
Given a list of strings, write a Python function that returns the longest string in the list. If there are multiple strings with the same maximum length, return the first one
You are given a list of integers and you need to write a Python function that returns True if the list contains at least two identical adjacent elements, False otherwise
Write a Python function to find the maximum value in a given list of integers. If the list is empty, the function should return None
Implement a Python program that takes a list of integers as input and returns a new list that contains only the even numbers from the original list
Write a function that takes a list of strings as input and returns a single string that is the result of concatenating all the strings in the list
Write a function that takes a string and an integer as input, and returns the string repeated the specified number of times
Write a Python function to check if a given list is a palindrome. The function should return True if the list is a palindrome, False otherwise. A palindrome is a list that reads the same backward as forward
Write a Python function that takes a list of numbers as input and returns the list of numbers in descending order.
Write a function that takes a sentence as input and returns the sentence with all vowels removed.
Implement a Python program that takes a string as input and checks if it is a palindrome or not.
Write a Python function that takes two lists as input and merges them to produce a new list, removing any duplicates.
Implement a Python function that takes a list of strings as input and returns the list of strings in alphabetical order.
Write a function to find the maximum value in a given list of integers using recursion
Create a Python function that takes in a list of tuples and returns the list sorted based on the second element of each tuple
Implement a Python function that takes a string input and returns the count of vowels in the string
Write a Python program to check if a given list of integers is in ascending order
Create a program that takes a dictionary object as input and returns the sum of all values in the dictionary
You are given a list of numbers and you need to write a Python function that returns the maximum number in the list. If the list is empty, the function should return -1.
You are given a string and you need to write a Python function that returns the number of times the character "a" appears in the string.
Write a function that takes a list of strings as input and returns the string with the maximum length. If all the strings have the same length, the function should return the first string.
You are given a tuple of integers and you need to write a Python function that returns a tuple with the elements in reverse order.
Write a function that takes a list of integers as input and returns the largest prime number in the list. If there is no prime number in the list, the function should return -1.
You are given a list of numbers and a target value. Write a function to find all pairs of numbers in the list that sum up to the target value
You are given a string of parentheses. Write a Python function to check if the string is balanced, i.e., every opening parenthesis has a corresponding closing parenthesis
You are given a dictionary where the keys are names of students and the values are their corresponding grades. Write a function `find_average_grade` that takes this dictionary as an input and returns the average grade of all students
Write a function that takes a list of words as an input and returns the longest word in the list
You are given a string containing multiple lines of text. Write a Python function to count the number of lines that start with a lowercase letter
Design a Python function that takes a string as input and returns the string with all vowels removed. If the string is empty, it should return the empty string
Write a function that takes a list of integers as input and returns a new list that includes only the numbers that are divisible by 3 or 5
Develop a Python function that takes a string as input and returns True if the string is a palindrome, False otherwise
Write a function that takes an integer n as input and returns a list of all prime numbers less than or equal to n
Design a Python class called "Circle" with attributes "radius" and methods "area" and "circumference"
Create a function 'has_capital_letter' that takes a string ('s') as input and returns 'True' if the string contains at least one capital letter, 'False' otherwise.
Write a program that asks the user for the number of sides of a shape and then prints out a message that says 'This shape has {num_sides} sides.'
Design a function that takes a list of integers as input, removes duplicates from the list, and returns the resulting list.
Write a Python function that takes a string ('s') as input and returns 'True' if the string contains only digits, 'False' otherwise.
Create a function 'average_score' that takes a list of exam scores as input, calculates the average score, and returns it.
Write a Python function that takes a list of strings as input and returns the count of strings that start with a vowel.
You are given a list of integers representing the height of buildings. Develop a function that takes this list as input and returns the total surface area of the buildings.
Create a function that takes a list of tuples as input, where each tuple contains a person's name and age. The function should return a new list of tuples, sorted in descending order of age.
You are given a 2D list representing a maze. Write a function to find the longest path in the maze, where a path can only move up, down, left, or right.
You are given a list of 2D points. Write a Python function to find the point that is closest to the origin (0,0).
Develop a Python function that takes a list of strings as input and returns the count of strings that contain exactly two vowels.
Write a Python program that reads a file and prints the lines in reverse order.
You are given a dictionary where the keys are names of products and the values are their corresponding prices. Write a function `find_cheapest_product` that takes this dictionary as an input and returns the name of the cheapest product.
Create a function that takes a list of integers as input and returns the count of prime numbers in the list.
Write a function called count_vowels that takes a string as input and returns the total count of vowels in the string.
Write a function that takes a list of numbers as input and returns the sum of all the numbers in the list.
Write a function that takes a string as input and returns the string in uppercase.
Write a function that takes a list of strings as input and returns the longest string in the list.
Write a function that takes two integers as input and returns True if the first integer is greater than the second, False otherwise.
Implement a Python function to remove all occurrences of a specified character in a given string.
Write a function to convert all uppercase characters in a given string to lowercase and vice versa.
Implement a function that takes a list of integers as input and returns the second largest element in the list.
Write a function to calculate the factorial of a given non-negative integer.
Write a function that takes in a list of integers and returns a new list with all the duplicates removed
Create a Python function that takes a sentence as input and returns the sentence with the first character of each word capitalized
Write a function that takes in a 2D list of integers and returns the sum of all the elements in the list
Create a Python function that takes a list of strings as input and returns the longest string in the list
Write a function that takes in an integer as input and returns the binary representation of the number as a string
Write a Python program to count the number of unique characters in a given string
Write a Python function that takes a list of integers as input and returns the list sorted in descending order
Write a Python program to find the longest common prefix among a list of strings
Write a Python function that takes a string as input and returns the string with all vowels removed
Write a Python program to check if a given list of integers is sorted in ascending order
Write a Python function that calculates the area of a circle given its radius as input. For example, if the input radius is 5, the function should return 78.5
Given a string `s`, write a function that returns the second most frequent character in the string. If there is no second most frequent character, the function should return None. For example, if `s = 'hello world'`, the second most frequent character is `l`
Write a function that takes a list of strings as input and returns the longest string in the list. For example, if the input list is `['apple', 'banana', 'cherry']`, the function should return `'banana'`
Write a Python function that takes an integer `n` as input and returns the `n`th Fibonacci number. For example, if `n = 5`, the function should return 5
Given a list of tuples, where each tuple contains a name and a grade, write a function that returns the names of students with the highest grade. For example, if the input list is `[('Alice', 90), ('Bob', 85), ('Charlie', 90)]`, the function should return `['Alice', 'Charlie']`
Write a function that takes a string as input and returns the string with all whitespace characters removed
Create a Python program that accepts a list of integers from the user and returns the second largest number in the list
Write a function that takes a list of strings as input and returns the longest string in the list
Write a Python function that calculates the product of all the numbers in a given list of integers
Write a function that takes a list of lists as input and returns a single list that contains all the elements from the sublists
Create a dictionary with keys 'model', 'year', 'mileage', and 'color'. Use the input function to ask the user for the values and store them in the dictionary
Implement a function that takes a list of strings and returns a new list containing only the elements that start with a vowel
Write a Python function that takes a string as input and returns the number of uppercase letters in the string
Write a Python program that prints all the multiples of 3 between 1 and 100
Implement a Python function that takes a list of integers as input and returns the number of elements that are greater than their previous element
Write a Python function to count the number of vowels in a given string. For example, if the input string is "hello", the output should be 2, because there are two vowels "e" and "o".
Create a Python function that takes a list of integers as input and returns the second largest number in the list.
Write a Python program that takes a list of strings as input and returns a new list containing only the strings that have more than 5 characters.
Create a Python function that takes two integers as input and returns their greatest common divisor (GCD).
Write a Python function to convert a given binary number to decimal. For example, if the input is "1010", the output should be 10.
Write a function that takes a string as input and returns the string with all vowels removed.
You are given a list of strings, where each string represents a person's name. Write a function that takes this list as input and returns a dictionary where the keys are the first letters of the names and the values are lists of names that start with each letter.
Write a function to find the factorial of a given number.
You are given a list of tuples, where each tuple contains a person's name and age. Write a function that takes this list as input and returns a new list of tuples, sorted in descending order by age.
Write a function that takes a list of integers as input and returns the maximum product of three numbers in the list.
Write a Python function that accepts a string as input and returns the count of all vowels in the string
Create a function that takes a list of integers as input and returns True if the list contains an even number of odd integers, and False otherwise
Write a Python function that takes a list of dictionaries as input, where each dictionary represents a person with keys 'name' and 'age'. The function should return a new list with only the dictionaries of people above a certain age, which is provided as a second argument to the function
Write a Python function that accepts a list of integers as input and returns the second largest number in the list. If there is no second largest number, return None
Create a function that takes a string as input and returns the string reversed, but only if the original string was longer than a certain length, which is provided as a second argument to the function
Write a function to find the number of words in a given string.
Write a Python function to find the first and last occurrence of a specified element in a list.
Write a Python program to find the number of pairs of integers in a list whose sum is equal to a given target sum.
Write a function to find the longest increasing subsequence in a given list of integers.
Write a Python function to find the minimum number of operations required to convert a given string into a palindrome.
Write a Python function that takes a string as input and returns the string with all vowels removed
Write a Python program that calculates the average of a list of integers
Write a function that takes a list of strings as input and returns the longest string in the list
Write a Python program that finds the number of occurrences of a specific word in a given list of strings
Write a function that takes a list of integers as input and returns the count of all numbers that are greater than the average of the list
Write a Python function to count the number of vowels in a given string
Write a Python function to reverse a given string without using any built-in reverse function or slicing technique
Given a list of integers, write a Python function to find the second-largest number in the list
Write a Python function to convert a given binary number to decimal
Write a Python function to find the first duplicate in a given list of integers
Write a Python function to count the frequency of each character in a given string.
Create a function that takes a list of lists as input and returns a new list containing the reversed sublists.
Write a function to calculate the sum of digits of a given integer.
Write a Python class "Rectangle" with two attributes "length" and "width" and methods to calculate the perimeter and area.
Write a function that takes a string as input and returns the number of occurrences of each vowel in the string.
Write a Python function that takes a string as input and returns the string with all vowels removed
You are given a list of lists of integers. Write a Python function to find the maximum value in the inner lists and return it
Write a Python function to find all the numbers in a given list that are a perfect square
Implement a function that checks if a given list of strings is palindrome
Write a Python function that takes two strings as input and returns True if they are anagrams of each other, False otherwise
Write a function to reverse the order of elements in a given list. The function should return the reversed list.
Implement a Python function that finds the maximum and minimum values in a given list of integers. The function should return a tuple containing the maximum and minimum values.
Write a function that takes a string as input and returns the string with all leading and trailing whitespaces removed.
Create a function to determine if a given list of integers is sorted in ascending order. The function should return True if the list is sorted, False otherwise.
Develop a Python program that takes a string as input and returns the string with all characters converted to uppercase.
Write a Python function to find the maximum number in a list of integers.
Implement a Python program that takes a list of strings as input and returns the list in reverse order.
Given a dictionary in Python, write a function to find and return the key with the maximum value.
Write a Python program to calculate the volume of a cylinder given its radius and height.
Write a function that takes in a list of integers and returns the count of all prime numbers in the list.
Write a function to count the number of prime numbers between two given integers
Given a string, write a function to find the first non-repeating character in the string
Write a function that takes a list of integers as input and returns the list with all duplicates removed
Write a function to calculate the factorial of a given number using recursion
Write a function to check if a given string is a rotated version of another string
Write a Python function that takes a dictionary as input where the keys are book titles and the values are lists of authors. The function should return a new dictionary where the keys are the authors and the values are lists of book titles.
Create a Python function that takes a list of strings as input. The function should return the string with the highest length. If there are multiple strings with the same highest length, the function should return the first one it encounters.
Write a Python function that takes a list of integers as input. The function should return the index of the first integer that is greater than its previous integer. If no such integer exists, the function should return -1.
Write a function that takes a list of lists as input where each sublist contains a city name and its corresponding population. The function should return a dictionary where the keys are the city names and the values are the populations, but only for cities with a population greater than 1 million.
Create a Python function that takes a string as input and returns the string in reverse order, but only if the string is a palindrome. If the string is not a palindrome, the function should return an empty string.
Write a Python function that takes a string as input and returns the string with all vowels removed
Create a Python program that takes a list of strings as input and returns a new list containing only the strings that start with a vowel
You are given a list of integers and you need to write a Python function that returns the count of numbers that are divisible by 3 or 5
Write a Python function that takes a dictionary as input and returns a new dictionary where each value is the square of the original value
Create a Python function that takes a string as input and returns the string with all uppercase characters converted to lowercase and all lowercase characters converted to uppercase
Write a Python function that takes a list of strings as input and returns the longest string in the list.
Implement a Python function gcd(a, b) that takes two integer arguments a and b, and returns their greatest common divisor.
Write a function that takes a list of integers as input and returns the count of all the prime numbers in the list.
Given a string, write a function to convert all the characters in the string to uppercase.
Write a Python function that takes a dictionary as input and returns a new dictionary with all keys and values swapped. If there are duplicate values in the original dictionary, the function should raise a ValueError.
Write a Python function that takes a list of strings as an input and returns the most frequently occurring string in the list
Develop a program that takes a list of integers as an input and returns a new list containing only the prime numbers from the original list
Implement a function to count the number of palindromes in a given list of strings
Write a Python function that takes a string as an input and returns a new string with all vowels removed
Develop a Python program that takes a list of integers as an input and returns the product of all the even numbers in the list
Write a function that takes a list of strings as input and returns the string with the highest frequency of occurrence. If there are multiple strings with the same highest frequency, return the first one
Create a function that takes in a dictionary object as input and returns the average value of all the keys in the dictionary. If the dictionary is empty, return a message 'Dictionary is empty'
Write a program to find the smallest number in a list of integers that is greater than a given number. If such a number is not found, return a message 'Number not found'
Given a list of lists, write a function to flatten the list of lists into a single list
Create a function that takes in a list of strings as input and returns the string with the longest length. If there are multiple strings with the same longest length, return the first one
Write a Python program to find the highest common factor (HCF) of two given numbers. If the HCF is not found, it should return a message 'HCF Not Found'
Write a function that takes a list of integers as input and returns the sum of the squares of all the integers in the list
Given a list of tuples, write a function to find the tuple with the maximum length and return it. If there are multiple tuples with the same maximum length, return the first one
Create a function that takes in a list of integers and checks if the list is in ascending order. The function should return True if the list is in ascending order, and False otherwise
Create a program that takes a list of dictionary objects as input and returns the dictionary object with the highest value for the key 'price'
Write a Python function that takes a string as input and returns the string with all vowels removed. For example, if the input is "hello world", the function should return "hll wrld".
Create a Python function that takes a list of strings as input and returns the longest string in the list.
Write a Python function that takes a list of integers as input and returns the product of all the odd numbers in the list.
Write a Python function that takes a dictionary as input and returns a new dictionary with all keys converted to uppercase.
Create a Python function that takes two lists of integers as input and returns a list of integers that are common in both lists.
Write a function that takes a list of integers as input and returns the count of numbers between 1 and 100 inclusive
Create a function that takes a string as input and returns True if it contains exactly two 'a's, False otherwise
Write a Python program to find the number of digits in the binary representation of an integer
Given a list of integers, write a function that returns the list in ascending order, but with the last element moved to the front
Write a function that takes a string as input and returns the number of characters that are vowels
Create a function that takes a string as an input and returns the frequency of each character in the string, ignoring case sensitivity.
Write a Python function that takes a list of strings as input and returns a new list containing only the strings that have a length of 5 characters or more.
Write a class called "Circle" with attribute "radius" and methods "area" and "circumference", considering pi as 3.14.
Implement a function that takes a list of integers as input and returns the sum of the cubes of all the numbers in the list.
Write a function that takes two lists of integers as input and returns True if they contain the same elements, regardless of their order, and False otherwise.
Write a Python function that takes a list of integers and a target sum as input, and returns a boolean indicating whether there exists a pair of integers in the list that sums up to the target sum
Given a string, create a Python function to return the frequency of each character in the string, ignoring case sensitiveness and spaces
Write a Python function that accepts a list of integers as input and returns a new list containing only the prime numbers in the original list
Design a Python function that takes a list of lists as input, and returns a new list containing only the lists that have more than two elements
Create a Python function that takes a string as input, and returns the count of each vowel in the string
Write a Python function `most_frequent_word` that takes a list of strings as input and returns the word that appears the most frequently.
Develop a Python function that takes a dictionary where the keys are cities and the values are their corresponding populations as an input and returns a dictionary with cities sorted in descending order of population.
Write a function that takes a list of integers as input and returns the maximum sum of a contiguous subarray within the one-dimensional array.
Write a Python function `check_anagram` that takes two strings as input and returns True if the strings are anagrams of each other, and False otherwise.
You are given a list of tuples where each tuple contains a name of a student, their age, and their grade. Write a function `highest_grade_student` that takes this list as an input and returns the name of the student with the highest grade.
Write a program to calculate the average of three numbers entered by the user
Implement a function that takes a list of integers as input and returns the sum of all even numbers in the list
Write a program that takes a string as input and prints out the string with the first character of each word capitalized
Create a program that asks the user for a list of numbers, checks if the list is sorted in ascending order, and prints out a message accordingly
Write a function that takes a string and an integer as input, and returns the string repeated the specified number of times
Write a function that takes a string as input and returns True if the string contains at least one digit, and False otherwise
Create a Python function that takes a list of strings as input and returns a new list containing only the strings that have a length of 5 or more characters
Implement a function that takes a dictionary as input and returns a new dictionary where all the values have been multiplied by 2
Write a Python function that takes two lists of integers as input and returns a new list containing all the elements that are common to both lists
Create a Python function that takes a list of integers as input and returns the frequency of the most frequently occurring element in the list
Implement a function that takes a string as input and returns a new string where all vowels have been removed.
Write a Python function that takes a list of integers and returns the average value of all the integers in the list.
Write a program that takes an integer as input and checks to see if it is an even number or an odd number. The program should return 'Even' if the number is even and 'Odd' if it is odd.
Write a Python function that takes a dictionary as an argument and returns a new dictionary where all keys and values have been swapped.
Write a program that takes a list of strings as input and returns the longest string in the list.
Write a Python function that takes a list of integers as input and returns a new list with all the even numbers removed.
Write a function that takes a string as input and returns the string with all vowels removed.
Write a Python function that accepts a list of lists as input and returns a flattened list containing all the elements.
Write a function to find the minimum value in a list of integers. If the list is empty, return None.
Write a Python function that takes a string as input and returns the string with all consonants replaced with their corresponding uppercase letters.
Write a function that takes a string as input and returns the count of all vowels in the string
Write a function that takes a list of numbers as input and returns the largest number in the list
Create a function to find the maximum depth of a binary tree
Write a function that takes a list of strings as input and returns the longest string in the list
Write a function that takes an integer as input and returns the number of 1's in the binary representation of the integer
Write a Python function to count the number of unique characters in a given string
Given a list of integers, create a function that returns the nth smallest number in the list, where n is provided as an argument to the function. If n is larger than the list length, return -1
Write a function that takes in a string and returns the string with all characters reversed, but only if the length of the string is greater than 5
Create a function that takes a list of strings as input and returns a list of strings that are longer than 3 characters
Write a function that takes a list of integers and returns a list of the same integers, but with all the duplicates removed and sorted in ascending order
Write a Python function that takes a list of strings as input and returns the string that appears most frequently.
Implement a Python function that takes a dictionary as input and returns a new dictionary with all keys converted to uppercase.
You are given a list of integers and a target sum. Write a Python function that finds the pair of numbers in the list that adds up to the target sum.
Write a Python program that calculates the average of all the numbers in a given list.
Implement a function that takes a list of strings as input and returns the longest string in the list.
Create a Python function that takes a list of numbers and returns the list sorted in descending order
Write a function that takes a year as input and returns True if the year is a leap year, False otherwise
Write a Python program to find the average of a list of numbers
Create a Python function that takes a string as input and returns the string in uppercase
Write a Python function that takes a list of strings as input and returns the list sorted alphabetically
You are given a list of numbers and a target sum. Write a Python function to find all unique pairs in the list that add up to the target sum.
Write a Python program to count the frequency of each character in a given string. For example, if the input string is "hello world", the function should return a dictionary with the character frequencies, such as {'h': 1, 'e': 1, 'l': 3, 'o': 2, ' ': 1, 'w': 1, 'r': 1, 'd': 1}.
Given a list of tuples, where each tuple contains a student's name and grade, write a Python function to find the student with the highest grade. If there are multiple students with the same highest grade, return all of them.
Write a Python program to find the longest common prefix in a list of strings. For example, if the input list is ['apple', 'application', 'apply'], the function should return 'app'.
Write a Python function to rotate a given list of integers by a specified number of positions. For example, if the input list is [1, 2, 3, 4, 5] and the rotation is 2, the output should be [4, 5, 1, 2, 3].
Create a function that counts the number of vowels present in a string. If no vowels are present, the function should return 0.
Design a function that takes a list of strings as input and returns a new list where each string is capitalized.
Write a Python function to check if a given number is a prime number. If the number is prime, the function should return True, otherwise False.
Create a function that checks if a given string contains any numbers. If the string contains a number, the function should return True, otherwise False.
Design a Python function to find the highest number in a list. If the list is empty, it should return -1.
Implement a function that takes a string as input and returns it with all vowels removed.
Write a Python function to count the number of times a given word appears in a list of strings. If the word does not appear, the function should return 0.
Create a function that takes a list of integers as input and returns a list of their squares.
Write a function that takes a list of strings as input and returns a new list with all strings that are longer than five characters.
Implement a function that takes a string as input and returns the count of the number of times the substring 'abc' appears in the string.
Write a function that takes a list of integers as input and returns the sum of all the numbers that are divisible by three.
Write a Python function to determine if a given string contains any duplicate characters, ignoring case sensitivity and spaces.
Implement a function to check if a given string contains any alphanumeric characters.
Write a function to find the longest common suffix among a list of strings. If no common suffix is found, return an empty string.
Write a Python function that takes a list of integers as an argument and returns the count of numbers that are divisible by 3 or 5.
Write a function that takes a list of strings as input and returns the string with the maximum length. If multiple strings have the same maximum length, return the first one.
Write a function that takes a positive integer as an input and returns the sum of its digits.
Write a function that takes a string as an input and returns a new string where all occurrences of the first character are removed.
Write a Python function to check if a given string is a palindrome or not.
Implement a function that takes a list of integers as input and returns a new list with all duplicate elements removed.
Write a function that takes a list of integers as input and returns the second largest number in the list. If there is no second largest number, return None.
Write a Python function to check if all elements in a given list are identical or not.
Implement a function that takes two lists of integers as input and returns their intersection (i.e., a list of elements that are common to both lists).
Create a function that takes a list of strings as input and returns the longest string in the list. The function should return the first longest string if there are multiple strings with the same maximum length.
Given a list of integers, return the count of numbers that are divisible by either 2 or 5.
Write a function that takes a string as input and returns a new string with all vowels removed. The function should be case insensitive.
Create a function that takes a list of integers as input and returns the number of pairs of integers that have a difference of 1.
Write a function that takes a positive integer 'n' as input and returns the sum of all perfect squares less than or equal to 'n'.
Write a function to calculate the number of ways to make change for a certain amount of money using a given set of coins. For example, if the function is given the amount 5 and the coins [1, 2, 5], the function should return 4, since there are 4 ways to make change for 5 using these coins: 1+1+1+1+1, 1+1+1+2, 1+2+2, and 5
Write a function that takes a list of integers as input and returns the number of pairs of integers that have a difference of 2. For example, if the input list is [1, 2, 3, 4], the function should return 2, since there are two pairs of integers with a difference of 2: (1, 3) and (2, 4)
Write a function that takes a string as input and returns the longest substring that contains only unique characters. For example, if the input string is "abcabcbb", the function should return "abc", since it is the longest substring that contains only unique characters
Write a function that takes a list of integers as input and returns the majority element, which is the element that occurs more than half of the total number of elements in the list. For example, if the input list is [2, 2, 1, 1, 2, 2, 3], the function should return 2, since it is the majority element in the list
Write a function that takes a string as input and returns True if it is a valid parentheses sequence, and False otherwise. For example, if the input string is "((()))", the function should return True, since it is a valid parentheses sequence, but if the input string is "())", the function should return False, since it is not a valid parentheses sequence
Write a Python program to find the middle element of a singly linked list.
Create a function called `average_grade` that takes a dictionary as an input, where the keys are student names and the values are lists of their grades. The function should return the average grade of all students.
Write a Python function to check if a given list is sorted in ascending order.
Develop a Python program to find the longest common prefix among a list of strings.
Create a function to determine if a given graph is connected, where the graph is represented as an adjacency matrix.
Write a function that takes a list of integers and returns the count of all prime numbers in the list
Write a function to convert a given binary number as a string to its decimal equivalent
Given a dictionary where the keys are strings and the values are lists of strings, write a function to return a new dictionary with the keys and values swapped
Write a function that takes a list of strings as input and returns a new list with all the strings in reverse order
Write a function to count the number of occurrences of each word in a given string
Write a function that takes a string as an input and returns the frequency of each character in the string, returning a dictionary where keys are the characters and values are their frequencies
Write a function that takes a list of strings and returns the count of strings that start with an uppercase letter
Write a function that takes two lists of integers and returns a list of integers that are present in both lists
Write a function that takes a list of integers and returns the product of all integers in the list
Write a function that takes a list of integers and returns a new list where all consecutive duplicates are removed
Write a Python function that takes a list of integers as input and returns the list sorted in descending order.
Create a function that takes a string as input and returns the string in uppercase and the last character removed.
Write a program that takes a list of integers as input and returns the sum of all the even numbers in the list.
Write a function that takes a list of strings as input and returns the list sorted by the length of the strings in ascending order.
Write a function that takes a string as input and returns the string with all the characters after the first occurrence of the character 'a' removed.
Given a list of strings, write a function to find and return the longest common prefix among all strings. If there is no common prefix, the function should return an empty string.
Write a function to count the occurrences of each digit in a given integer and return a dictionary with the digit as the key and its count as the value.
Create a function that takes a list of integers as input and returns the second maximum value in the list. If the list has less than two elements, the function should return None.
Write a function to check if a given string is a palindrome. The function should return True if the string is the same when reversed, and False otherwise.
Given a list of tuples, where each tuple contains a student's name and grade, write a function to find and return the average grade of the class.
Write a Python function that takes a string as input and returns a new string that has all the vowels removed, regardless of the case.
You are given a list of strings and you need to write a Python function that returns a new list that only contains the strings that are palindrome.
Create a Python function that takes a tuple of integers as input and returns the maximum value in the tuple. If the tuple is empty, the function should return None.
Write a Python function that accepts a list of lists of integers as input, and returns the sum of all the integers in the lists.
You are given a dictionary where the keys are Student IDs and the values are lists of grades. Create a Python function that returns a new dictionary that has the Student IDs as keys and the average grades as values.
Write a Python function that takes a list of integers as input and returns the count of numbers that are perfect squares.
Given a string, write a function to find the longest palindromic substring and return it. If there are multiple palindromic substrings with the same maximum length, return the first one.
Write a function `sort_dict` that takes a dictionary as an input and returns a new dictionary with the keys sorted in alphabetical order.
Write a Python program that takes a list of strings as an input and returns the shortest string in the list. If there are multiple shortest strings, return the first one.
Write a function `calc_variance` that takes a list of numbers as an input and returns the variance of the list.
Write a function to find the minimum value in a list of integers, without using the built-in min() function
Given a list of integers and a target sum, write a function to return all unique pairs of integers that add up to the target sum
Create a Python function that accepts a string as input and returns True if the string contains only digits, False otherwise
Write a function to find the longest substring in a given string without repeating characters
Implement a Python function to merge two sorted lists into a single sorted list
Write a Python function that takes a list of strings as input and returns the string with the maximum length
Write a Python program that takes a dictionary as input and returns a new dictionary containing only the key-value pairs where the key is an even number
Write a function to find the maximum depth of a nested list. The depth of a list is defined as the maximum number of nested lists it contains
Write a Python program that takes two strings as input and returns True if they are anagrams of each other, False otherwise
Create a program that takes a list of integers as input and returns the count of integers that are greater than their adjacent elements
Write a Python function that takes a list of tuples as input, where each tuple contains a date string in the format "YYYY-MM-DD" and an integer value, and returns a dictionary where the keys are the unique dates and the values are lists of integers corresponding to each date. For example, if the input is [("2022-01-01", 10), ("2022-01-01", 20), ("2022-01-02", 30)], the output would be {"2022-01-0…
Implement a class called `Stack` with methods `push`, `pop`, and `peek`. The `push` method should add an element to the top of the stack, the `pop` method should remove and return the top element, and the `peek` method should return the top element without removing it.
Write a Python function that takes a list of lists as input, where each inner list contains integers, and returns a new list where each integer is the sum of the corresponding integers in the inner lists. For example, if the input is [[1, 2, 3], [4, 5, 6], [7, 8, 9]], the output would be [12, 15, 18].
Write a Python function that takes a string as input and returns the string with all vowels removed.
Write a Python function that takes a list of dictionaries as input, where each dictionary represents a student with keys "name" and "grade", and returns a dictionary where the keys are the unique grades and the values are lists of student names corresponding to each grade. For example, if the input is [{"name": "Alice", "grade": "A"}, {"name": "Bob", "grade": "B"}, {"name": "Charlie", "grade": "A…
Create a class called "Car" with two attributes "color" and "model" and two methods "start_engine" and "stop_engine"
Write a function that takes a list of integers as an argument and returns a new list containing the square of each integer
Given a list of strings, write a function that returns a dictionary where the keys are the strings and the values are the lengths of the strings
Write a function that takes an integer as an argument and returns the sum of its digits
Given a list of integers, write a function that returns the second smallest number in the list. If the list has less than two elements, the function should return None
You are given a string as input. Write a Python function that takes this string as an argument and returns the string with all vowels removed
Write a class called "Circle" with attributes "radius" and methods "area" and "circumference"
Develop a Python program that takes a list of strings as input and returns the string with the maximum length
Create a function that takes a list of integers as an argument and returns the difference between the maximum and minimum values in the list
You are given a dictionary as input where the keys are names and the values are ages. Write a Python function that takes this dictionary as an argument and returns the name of the person with the maximum age
You are given a list of strings where each string represents a time in the format "HH:MM" in a 24-hour clock. Write a function that takes this list as input and returns a new list that contains only the times that are between 08:00 and 17:00.
Write a function that takes a list of integers as input and returns the second largest number in the list. If the list contains less than two distinct numbers, the function should return None.
You are given a list of strings where each string represents a product name. Write a function that takes this list as input and returns a dictionary where the keys are the product names and the values are the frequencies of each product name in the list.
Write a function that takes a list of lists as input, where each sublist contains integers. The function should return the sublist that contains the maximum sum of its elements.
You are given a list of strings where each string represents a username and password separated by a colon. Write a function that takes this list as input and returns a dictionary where the keys are the usernames and the values are the passwords.
Write a Python function that takes a list of integers as input and returns the list sorted in descending order
You are given a list of words and a target word. Write a function to find out the frequency of the target word in the given list of words
Write a Python function that takes a list of strings as input and returns a single string which is the concatenation of all strings in the list, separated by a comma
You are given a list of integers. Write a function to find the second largest number in the list
Create a function that takes a list of integers as input and returns a new list containing only the even numbers from the original list.
Write a Python program that takes a string as input and returns the string with all consonants capitalized and all vowels in lowercase.
Given a list of strings, write a function to find the longest string in the list. The function should return the length of the longest string.
Write a Python function that takes a dictionary as input and returns a new dictionary containing only the key-value pairs where the value is greater than a specified threshold.
Create a function that takes a string as input and returns the string with all digits replaced with their corresponding roman numerals.
Write a Python function that takes two lists of integers as input and returns a list containing the elements that are present in both lists.
Write a Python program that accepts a string input from the user and prints out the string in reverse order.
A function takes a list of integers as input and returns the difference between the maximum and minimum values in the list.
Write a Python function that takes a list of strings as input. The function should return the longest string in the list.
Implement a function that takes a list of integers and returns a new list containing only the positive elements that are less than 100.
Write a function to count the frequency of each word in a given list of words and returns a dictionary where keys are the words and values are the corresponding frequencies
Develop a Python program that reads a list of unique numbers representing sensor values from a file and calculates the median of the numbers
Write a Python function that takes a list of lists as input, where each sublist contains a student's name and their scores, and returns a list of tuples where each tuple contains a student's name and their average score
Write a Python function to sort a list of dictionaries based on a specific key in the dictionary
Develop a Python program that takes a list of numbers as input and returns the numbers that are greater than the average of the list
Write a function that takes a list of integers as input and returns a list of tuples, where each tuple contains a number and its square
Develop a Python program that takes a string as input and returns the string with all vowels removed
Write a function that takes a list of lists as input, where each sublist represents a matrix, and returns a new list of lists that represents the transpose of the matrix
Write a Python function that takes a list of integers as input and returns the number of elements that are divisible by 3
Develop a Python program that takes a list of strings as input and returns a new list that contains the strings in reverse order
You are given a list of integers. Write a Python program to find the second largest number in the list.
Write a function that takes a string as input and returns the string with all vowels removed.
Implement a function that takes a list of tuples as input, where each tuple contains a student's name and their grade. The function should return a dictionary with the student's names as keys and their grades as values.
Write a Python function to check if a given string is a palindrome. If it is a palindrome, return True; otherwise, return False.
Write a function that takes a list of strings as input and returns a new list with all the strings in uppercase.
Write a function that takes a dictionary as input and returns a new dictionary that contains only the key-value pairs where the keys are strings.
Write a Python program to count the number of vowels in a given string.
Create a function that takes a list of integers as input and returns the maximum difference between any two elements in the list.
Write a function that takes a string as input and returns True if the string is a palindrome, and False otherwise.
Write a function that takes a list of integers as input and returns a new list that contains only the elements that are not repeated in the original list.
Create a Python function that takes a list of strings as input and returns the longest string in the list.
Write a Python program to check if a given string is a palindrome.
Create a class Employee with properties: employee ID, name, and salary. The class should also have a method to increase the salary by a certain percentage.
Write a function that takes a dictionary as input and returns a list of all its keys.
Create a Python function that takes a string as input and returns True if the string represents a valid email address, and False otherwise.
Write a Python function that takes a list of strings as input and returns the longest string in the list.
Implement a Python function that takes two lists of integers as input and returns a new list containing the elements that are common to both lists.
Write a Python program to count the number of prime numbers in a given list of integers.
Write a Python function that takes a list of integers as input and returns True if the list is sorted in ascending order, False otherwise.
Write a Python program to create a 2D list from a given list of integers, where each inner list represents a row in the 2D list and the number of columns is a specified input parameter.
Write a Python function that takes a list of strings as input and returns a new list containing the length of each string.
Create a Python function that takes a dictionary as input and returns a new dictionary containing the square of each value.
Your are given a time string in the format HH:MM:SS. Write a Python function to convert the time from 12-hour format to 24-hour format. The function should return the converted time in the same format.
Create a Python function that takes a list of integers and returns a new list containing the sum of each pair of adjacent numbers.
Write a Python function that takes a string as input and checks if the string contains all the vowels. If the string contains all the vowels, the function should return True; otherwise, it should return False.
determine whether a given string is a palindrome or not.
write a function that takes a list of strings as input and returns the longest string in the list.
implement a function that takes two integers as input and returns their greatest common divisor.
create a function that takes a list of integers as input and returns the sum of the squares of all the integers in the list.
write a function that takes a string as input and returns the string with all vowels removed.
Write a Python function that calculates the average grade of a student given a dictionary of courses and their respective grades.
Create a Python function to determine whether a number is a prime number or not.
Write a function that accepts a string as input and returns the string with all vowels removed.
Develop a Python function that takes a list of lists as input and returns a single list containing all elements from the input lists.
Write a function that takes a dictionary as input and returns a new dictionary with keys and values swapped.
Create a Python function to find the second largest number in a list of integers.
Write a function to calculate the factorial of a given integer
Write a function that takes in a list of strings and returns the number of strings that start with a capital letter
Write a function to remove all duplicates from a given list of integers
Write a function that takes in a list of floats and returns the average value of the list
Write a function to calculate the area of a circle given its radius
Write a function that takes a list of integers as input and returns a new list with all the prime numbers removed
Implement a calculator class that provides methods for addition, subtraction, multiplication, and division. Each method should accept two numbers as input.
Write a function that takes a list of strings as input and returns a dictionary where the keys are the strings and the values are the number of occurrences of each string in the list.
Create a function that takes a list of integers as input and returns a tuple containing the minimum, maximum, and average of the numbers in the list.
Implement a Stack class using a list. The class should have the following methods: push, pop, peek, and size. The push method should add an element to the top of the stack, the pop method should remove an element from the top of the stack, the peek method should return the element at the top of the stack without removing it, and the size method should return the number of elements in the stack.
Write a function that takes a string as input and returns the string with all vowels removed.
Write a function that takes a list of integers as input and returns the list sorted in descending order
Create a Python function that takes a string as an input and returns a new string with all characters in uppercase
Write a Python program to calculate the average of all numbers in a given list
Write a function that takes a dictionary as an input and returns a list of all the keys in the dictionary
Write a function that takes a list of strings as input and returns a new list that contains all the strings in lowercase
Write a function to rotate an image of size n x n represented by an n x n 2D list of integers by 90 degrees clockwise.
Write a function that takes an integer as input and returns the string representation of the integer, replacing the last three digits with '***' if the number has more than 3 digits.
Write a function to find the first duplicate in a given array of integers and return it. If no duplicate is found, return None.
Write a function to find the middle node of a singly linked list.
Write a function to convert a given binary tree into a doubly linked list in-place.
Write a Python program to create a list of tuples, where each tuple contains a number and its square, from a given list of integers
Write a function to count the occurrences of each word in a given string, ignoring case sensitivity and storing the results in a dictionary
Write a Python program to find the common elements in two given lists
Write a function to convert a given list of 24-hour clock times into 12-hour clock format, with AM/PM indication
Write a Python function to compute the average of all the elements in a list.
Given two lists A and B, return the list of elements that are present in A but not in B. For example, if A = [1, 2, 3, 4] and B = [3, 4, 5, 6], the function should return [1, 2].
Write a Python function that takes a list of strings as input and returns the list of strings sorted in ascending order of their lengths.
Write a Python function that takes a list of integers as input and returns the count of prime numbers in the list.
Given two lists A and B, return the list of elements that are present in both A and B, preserving the original order of elements in A. For example, if A = [1, 2, 3, 4] and B = [3, 4, 5, 6], the function should return [3, 4].
Write a function that takes a string as input and returns the frequency of each character in the string.
Develop a Python program that takes a list of strings as input and returns the longest string in the list.
Write a function that takes a dictionary of lists as input and returns the longest list in the dictionary.
A function takes a list of integers as input and returns the total count of all the prime numbers in the list.
Write a program that takes a list of strings as input and returns the list of strings in reverse order.
Write a Python function that takes a list of numbers as input and returns a dictionary where the keys are the numbers and the values are their frequencies in the list
Create a Python program that takes a string as input and returns the string with all vowels removed
Write a Python function that takes a list of lists as input and returns the total sum of all the elements in the lists
Write a Python program that takes a list of strings as input and returns the longest common prefix among all the strings
Create a Python function that takes a number as input and returns the sum of its digits
Write a Python function to calculate the factorial of a given number using recursion
Write a function to find the minimum and maximum values in a given list of numbers
Create a Python program to convert a given binary number into decimal
Write a function that takes a list of tuples, where each tuple contains a student's name and grade, and returns the student with the highest grade
Write a Python program to implement a simple calculator that can perform addition, subtraction, multiplication, and division operations
Write a Python function that takes a dictionary as input and returns the sum of all the values in the dictionary.
Create a Python function that takes a list of tuples as input where each tuple contains two integers and returns a new list of tuples where the two integers in each tuple are swapped.
Write a Python function that takes a list of strings as input and returns a new list where all the strings are in uppercase.
Write a function that takes two lists of integers as input and returns a new list that contains the intersection of the two lists.
Write a Python function that takes a list of integers as input and returns the list in reverse order.
Implement a function that takes a string as input and returns the string with all vowels removed, ignoring case
Create a Python function that takes a list of strings as input and returns a new list that contains only the strings that start with a vowel
Write a Python program that takes a list of integers as input and returns the second largest number in the list
Design a Python function that takes a list of lists as input and returns a new list that contains only the lists with more than two elements
Write a Python function that takes a string as input and returns True if the string is a palindrome, and False otherwise
You are given a list of integers and you need to write a Python function that returns the count of all elements that are greater than the median of the list.
Write a function that takes in a list of strings and returns a new list containing only the strings that have a length greater than 5.
Create a function that takes an integer N as input and returns the sum of all integers from 1 to N that are not divisible by either 3 or 5.
You are given a dictionary where each key is a string and each value is a list of strings. Write a Python function to find the intersection of all lists in the dictionary.
Write a function that takes a list of integers and returns the longest contiguous subsequence with an average greater than a certain threshold.
Create a function 'find_largest' that takes a list of integers as input and returns the largest number in the list
Write a Python program to check if a given year is a leap year or not
Create a function 'find_common' that takes two lists of integers as input and returns a new list containing all common elements between the two lists
Write a Python function that takes a string as input and returns the number of all uppercase letters in the string
Create a function 'sort_list' that takes a list of integers as input, sorts the list in ascending order, and returns the sorted list
Create a function that checks if a given string contains only alphabets. The function should return True if the string contains only alphabets, False otherwise
Write a Python function to count the number of spaces in a given string
Implement a function that takes a list of integers as input and returns True if the list contains at least one even number, False otherwise
Create a function that takes two lists of integers as input and returns True if the lists contain the same elements, in any order, and False otherwise
Write a function that takes a list of strings as input and returns the string with the maximum length
Write a Python function that takes a list of numbers as input and returns the sum of all the even numbers in the list.
Create a Python program that prompts the user to input a sentence and then displays the sentence with each word in reverse order.
Write a function that takes a list of integers as input and returns the average of the numbers that are less than the median of the list.
Write a Python program to check if a given list of integers represents a valid binary search tree. A binary search tree is valid if the value of each node is greater than or equal to the values in its left subtree and less than or equal to the values in its right subtree.
Create a Python function that takes a dictionary object as input and returns the average of all the values in the dictionary.
Write a Python function that takes a string as input and returns the string in reverse order
Write a Python function that takes a list of lists as input and returns the sum of all the elements in the inner lists
Write a Python function that takes a dictionary as input and returns a new dictionary that contains only the items where the value is greater than 5
Write a Python function that takes a list of strings as input and returns the count of strings that start with a vowel
Write a Python function that takes a list of integers as input and returns the count of numbers that are greater than 10
Write a Python function that takes a list of integers and returns True if the list contains at least one duplicate, False otherwise
Given a string s, return the number of times the substring 'abc' appears in s
Write a Python function that takes a string as input and returns the string with all characters in uppercase
Write a Python function that takes a list of strings as input, returns the list sorted in descending alphabetical order
Write a Python function that takes a list of integers as input and returns the list with all numbers greater than 5 incremented by 1
Write a Python function that accepts a list of numbers as input and returns the count of even numbers in the list.
Create a Python function that takes a tuple as input and returns the sum of all numbers in the tuple.
Write a Python program that takes a sentence as input and returns a new sentence with all the words in reverse order.
Write a function that calculates the average of all the numbers in a list where the numbers are given as an input.
Design a Python function that accepts a list of lists as input and returns a new list with all the sublists flattened into a single list.
Write a function that takes a string as input and returns a new string with all the vowels removed.
You are given a list of integers, write a function that finds the number that appears most frequently in the list. If there's a tie, return all the numbers that appear with the highest frequency.
Write a function that takes a list of strings as input and returns a list of strings where all the strings have their case swapped, i.e., lowercase letters become uppercase and vice versa.
You are given a dictionary where the keys are names of cities and the values are their corresponding populations. Write a function `find_largest_city` that takes this dictionary as an input and returns the name of the city with the largest population.
Write a function that takes a list of integers as input and returns a new list with each element squared.
Write a function that takes a list of lists as an input, where each sublist contains two integers. The function should return the sum of the products of the integers in each sublist.
Create a Python function that takes a string as an input and returns the string with all vowels removed. The function should be case-insensitive.
You are given a list of integers and a target sum. Write a Python function to find all unique pairs of integers in the list that add up to the target sum.
Write a function that takes a string as an input and returns True if the string is a palindrome, False otherwise. The function should be case-insensitive and should ignore spaces and punctuation.
Create a Python function that takes a list of strings as an input and returns a new list that contains only the strings that are in alphabetical order.
Write a Python function that takes a list of integers as input and returns the number of elements that are greater than the average of the list.
Write a function that takes a string as input and returns a new string that contains the original string but with all vowels removed.
Implement a function that takes a list of integers and returns the maximum sum of a subarray within the list.
Write a Python function that takes a list of lists as input and returns a new list that contains the elements of the inner lists in a single list.
Write a function that takes a string as input and returns the string with all occurrences of a specified substring replaced with another substring.
Write a function that takes in a string and returns the string with all characters converted to uppercase.
Write a function that calculates the area of a circle given its radius.
Write a Python function that takes a list of integers as input and returns the total sum of all the numbers in the list.
Write a function that takes a sentence as input and returns the sentence with all punctuation marks removed.
Write a function that takes a dictionary as input and returns a new dictionary with all keys in lowercase.
Implement a Python function that takes a tuple of strings as input and returns a list containing only the strings that start with an uppercase letter.
Write a function that takes a list of integers as input and returns the average of the numbers in the list.
Write a Python program to find the median of a given list of integers.
Write a Python function to calculate the frequency of each character in a given string.
Write a function that takes a list of strings as input and returns a list of their lengths.
Write a function to print the first n Fibonacci numbers where n is provided as an argument to the function.
Write a function to count the number of occurrences of a substring in a given string.
Write a function to check if a given list is sorted in ascending order. The function should return True if the list is sorted, False otherwise.
Write a function to remove all duplicate elements from a list of integers while preserving the original order.
Write a function that takes a string as input and returns the string in uppercase if its length is even, otherwise returns the string in lowercase.
Given a list of integers, write a Python function to find the second largest number in the list.
Write a Python function that takes a list of characters as input and returns True if all characters are unique, False otherwise.
Implement a Python function that takes a list of integers as input and returns the number of elements that are perfect squares.
Write a Python function to check if a given list of integers is in ascending order.
Write a Python function that takes a list of integers as input and returns the count of all even numbers in the list.
Develop a program that takes a string as input and checks if it is a palindrome. Return True if it is, and False otherwise.
Create a Python function that takes a list of strings as input and returns the list sorted in alphabetical order.
Write a Python program to find the maximum element in a given list of integers.
Write a function that takes an integer as input and returns the number of digits in the integer.
Create a Python class that represents a Student. The class should have attributes for student name, student age, and a list of grades. The class should also have methods for adding a new grade and calculating the average grade
Write a function that takes in two lists of integers and returns a new list that contains only the elements present in both lists
Write a Python function that takes a dictionary as input and returns a new dictionary with the keys and values swapped. For example, if the input dictionary is {'a': 1, 'b': 2, 'c': 3}, the output should be {1: 'a', 2: 'b', 3: 'c'}
Write a function that takes in a list of strings and returns the string that appears most frequently in the list
Create a Python class that represents a Rectangle. The class should have attributes for length and width. The class should also have methods for calculating the area and perimeter of the rectangle
Write a Python function that takes a dictionary as input and returns the sum of all values in the dictionary.
Write a Python function that takes a list of integers as input and returns a new list with all even numbers removed.
Develop a Python program to check if a given string is a palindrome, reading the same backwards as forwards.
Write a function to find the longest word in a given list of strings.
A common operation in data analysis is to count the occurrences of each element in a list. Write a Python function that takes a list as input and returns a dictionary where the keys are the elements and the values are their corresponding counts.
Design a Python class to calculate the area and perimeter of a rectangle, allowing the user to set the length and width of the rectangle.
Create a Python function that takes a list of numbers as input and returns the largest number in the list.
Write a Python function that takes a string as input and returns the string with all vowels removed. For example, if the input is "Hello World", the output should be "Hll Wrld".
Write a Python program that takes a list of lists as input and returns a new list containing all the elements of the inner lists, but with duplicates removed.
Write a Python function that takes a number as input and returns the factorial of that number.
Write a function that takes a string as input and returns the string in reverse order
Write a Python program to calculate the factorial of a given number using recursion
Write a Python function that takes a list of strings as input and returns a new list containing all the strings in uppercase
Write a Python function that takes two lists as input and returns a new list containing the elements that are present in either of the lists
Write a Python function that takes a list of integers as input and returns the count of all prime numbers in the list
Write a Python function that takes a list of strings as input and returns the total count of all vowels in all the strings.
Given a list of tuples where each tuple contains a name and a phone number, write a Python function that returns a dictionary where the keys are the phone numbers and the values are lists of names associated with the phone number.
Implement a Python function that takes a dictionary where the keys are names and the values are lists of hobbies as input and returns a new dictionary where the keys are hobbies and the values are lists of names associated with the hobby.
Write a Python function that takes a list of integers as input and returns a new list containing only the integers that are greater than the average of the input list.
Given a list of strings where each string represents a time in the format "HH:MM", write a Python function that returns the time that is closest to the middle of the day (12:00).
Write a function that takes a list of integers as input and returns the count of all numbers that are less than their preceding number in the list.
Write a Python program to create a function `most_frequent` that takes a list of strings as input and returns the string that appears most frequently in the list. If there are multiple strings with the same highest frequency, return the first one.
Given a list of lists, write a function to find the sublist with the maximum sum and return it. If there are multiple sublists with the same maximum sum, return the first one.
Write a function to find all pairs of integers in a list that add up to a given target sum.
Write a Python function to find the first duplicate in a list of integers. If there are no duplicates, return -1.
Write a function that takes a list of strings as input and returns True if all strings in the list start with the same character, and False otherwise
Given a list of integers, write a Python program to find the number of elements that are greater than the average of the list
Create a Python function that takes a list of integers as input and returns the product of all even numbers in the list
Write a Python function that takes a list of integers as input and returns the sum of the cubes of all the numbers in the list
Write a function to calculate the average of first n prime numbers where n is a positive integer
Write a Python function that takes a string as input and returns the frequency of the most frequently occurring word in the string
Write a Python program to determine if a given number is a prime number or not
Write a Python function that takes a list of lists as input and returns the maximum length sublist
Write a Python function that takes a string as input and returns the string with all vowels removed
Write a Python function that takes a list of integers as input and returns the product of all the elements in the list
Write a Python function that takes a list of integers as input, removes duplicates, and returns the list in sorted order
Write a Python function that takes a string as input and returns the string with all vowels removed
Develop a function that takes a list of lists as input, where each sublist contains two elements: a string and an integer. The function should return a dictionary where the keys are the strings and the values are the sums of the corresponding integers
Write a Python function that takes an integer n as input and returns a list of all prime numbers less than or equal to n
Write a function that takes a string as an input and returns the frequency of each character in the string, ignoring case
Given a list of integers, write a function that returns a new list containing only the even numbers from the original list
Write a function that takes a list of integers as input and returns the largest number that is divisible by 3
Write a Python function that takes a URL as input and returns the HTML content of the webpage
Write a function that takes a string as an input and returns the count of vowels in the string
Write a function that takes a list of integers as input and returns the maximum value from the list
Write a function that takes two dictionaries as input and returns a new dictionary that contains only the common keys and their corresponding values
Write a function that takes a list of strings as input and returns a new list that contains only the strings that start with a vowel
Write a function that takes a string as input and returns the string with all the vowels removed
Write a function that takes in a list of strings and returns the string that has the maximum number of characters
Create a function that takes a dictionary and returns a new dictionary with all keys converted to lowercase
Define a function `count_evens` that takes a list of integers as input and returns the count of even numbers in the list
Write a Python function, that takes a string and returns its reverse
Write a function that takes in a list of integers and returns the maximum and minimum values in the list
Write a function that takes a list of integers as input and returns a new list with all duplicates removed.
Write a function that takes a string as input and returns the string with all punctuation removed. The function should be able to handle both uppercase and lowercase letters.
Write a function that takes a dictionary as input and returns a new dictionary with all keys converted to lowercase.
Write a function that takes two lists of integers as input and returns a new list that contains the elements that are common to both lists.
Write a function that takes a list of tuples as input, where each tuple contains a string and an integer, and returns a new list of tuples sorted by the integer values in descending order.
Write a Python function that takes a string as input and returns the first non-repeating character in the string. If no such character exists, the function should return None
Write a function that takes in a list of lists and returns a new list that contains the average of each sublist
Write a function that takes in a list of strings and returns a new list with all strings converted to title case
Write a Python function that takes a list of integers and returns the maximum sum of a contiguous subarray within the list
Create a Python function that takes a string as input and returns the number of vowels in the string.
Design a program that takes a list of integers as input and returns the second-largest number in the list. If the list has less than two elements, return an appropriate message.
Write a Python program to create a function that checks whether a given string is a palindrome or not.
Create a Python function that takes a dictionary object as input and returns a new dictionary with keys and values swapped.
Implement a Python function that takes a string as input and returns the count of vowels in the string
Write a function that takes a list of integers as input and returns the maximum and minimum values in the list
Write a Python program to create a class for a Circle with attributes radius. The class should have methods to calculate the area and circumference of the circle
Write a Python function that takes a list of strings as input and returns the concatenated string
Implement a Python function that takes a list of integers as input and returns the number of prime numbers in the list
Develop a Python function that takes a dictionary as input and returns a new dictionary that only includes the key-value pairs where the value is greater than 10
Write a Python function that takes a list of tuples as input and returns the tuple with the maximum sum of its elements
Write a function that takes a string as input and returns True if all characters in the string are alphanumeric and False otherwise
Given a list of integers, write a function that returns the count of all prime numbers in the list
Write a function that takes a string as input and returns the count of all consonants in the string
Write a Python function to find all prime numbers less than a given number.
Write a function that calculates the number of digits in the factorial of a given number. For example, if the input is 5, the output will be 3 because the factorial of 5 is 120 which has 3 digits.
Implement a Python class called "Stack" with methods "push", "pop", and "peek". The "push" method will add an element to the stack, the "pop" method will remove an element from the stack, and the "peek" method will return the top element of the stack without removing it.
Write a function that takes a list of strings as input and returns the string with the maximum length. If all strings have the same length, return the first string in the list.
Write a Python function to check if a given number is a power of two.
Write a Python program to find all pairs of integers in a list that sum up to a given target value.
Write a function that takes a list of strings as an input and returns the string with the maximum length.
Given a string, write a function to check if it is a palindrome. A palindrome is a string that reads the same backward as forward.
Write a recursive function to find the nth number in the Fibonacci sequence. The Fibonacci sequence is a series of numbers where a number is the sum of the two preceding ones, usually starting with 0 and 1.
You are given a list of tuples, where each tuple contains a student's name and their corresponding grade. Write a function to find the student with the highest grade.
Write a function that reads a CSV file and outputs a dictionary where the keys are the column names and the values are lists of the corresponding column values.
Create a function that takes a list of strings as input and returns the longest string in the list. If there are multiple longest strings, return all of them.
Write a function to check if a given triangle is isosceles, given the lengths of its three sides.
Write a function that takes a list of tuples as input, where each tuple contains a word and its frequency. Return a dictionary where the keys are the words and the values are their frequencies.
Create a function that takes a list of integers as input and returns a new list with the integers sorted in descending order, except for the number 5, which should always be at the end of the list.
Write a function that takes a string as input and returns the string with all vowels removed. For example, if the input is "hello world", the function should return "hll wrld".
You are given a list of integers and a target sum. Write a function that finds all pairs of integers in the list that add up to the target sum.
Implement a function that takes a string as input and returns the reverse of the string. For example, if the input is "hello", the function should return "olleh".
You are given a list of lists of integers. Write a function that flattens the list of lists into a single list of integers. For example, if the input is [[1, 2], [3, 4], [5, 6]], the function should return [1, 2, 3, 4, 5, 6].
Write a function that takes a list of strings as input and returns a new list containing only the strings that start with a capital letter.
Write a function that takes a dictionary as input and returns the average of all the values in the dictionary.
You are given a list of strings. Write a Python function to find the longest string in the list and return its length.
Write a function that takes a string as input and returns True if it is a palindrome, otherwise returns False.
Write a function that takes a list of numbers as input and returns the largest number that is less than or equal to the average of the list.
Write a function that takes a string as input and returns the string with all the words reversed. For example, if the input is "Hello World", the output should be "World Hello".
{random.choice(functions)} that takes {random.choice(inputs)} as input {random.choice(operations)}.
Write a function to find the maximum value in a list of integers. If the list is empty, return 0.
Write a Python function to calculate the sum of the squares of the first n natural numbers.
Define a function `count_vowels` that takes a string as an input and returns the count of vowels in the string.
Create a function that calculates the standard deviation of a list of numbers. The function should take in a list of numbers as an input and return the standard deviation.
Write a Python function to find the longest word in a given list of words.
Write a Python program that takes a string as input and returns the most frequent character in the string. If there are multiple characters with the same highest frequency, return all of them.
Given a list of strings, write a function that returns the first string that is a substring of all the other strings in the list. If no such string exists, return an empty string.
Create a Python function that takes a list of tuples containing two integers each, and returns a new list containing only the tuples where the first integer is greater than the second.
Write a function that takes a list of integers as input and returns the longest sequence of consecutive numbers in the list. For example, if the input is [1, 2, 3, 4, 5, 7, 8, 9], the output would be [1, 2, 3, 4, 5].
Given a list of integers, write a function that returns True if the list is in strictly increasing order (i.e., each element is greater than the previous one) and False otherwise.
Write a Python program to find all the prime numbers in a range from 1 to N, where N is a user-defined input.
Write a function that takes a list of strings as input and returns the number of strings that start with a vowel.
Write a Python program to convert a binary number to a decimal number. If the binary number is invalid, the program should return an error message 'Invalid Binary Number'.
Write a function that takes two lists of integers as input and returns a new list where each element is the sum of the corresponding elements from the two lists.
Write a Python program to check if a given string is a palindrome or not. The program should return 'True' if the string is a palindrome and 'False' otherwise.
Write a Python function that takes a list of strings as an input and returns the longest string in the list. If there are multiple strings with the same maximum length, return the first one encountered
Implement a function that takes a string as input and returns True if the string contains only digits, otherwise False
Write a function that takes a list of integers as input and returns a new list containing only the integers that are greater than their adjacent integer in the list
Write a function that takes a list of tuples as input, where each tuple contains a string and an integer. The function should return a new list of tuples, sorted in ascending order based on the integer value in each tuple
Implement a function that takes a list of integers as input and returns the maximum product of two integers in the list
In Python, implement a function that takes a string as input and returns the most frequently occurring character in the string, if there are multiple characters with the same highest frequency, it should return the character that appears first in the string
Write a function that takes in a list of numbers and returns true if the list is in ascending order, false otherwise
Write a function that takes a 2D list as input and returns the average of all the numbers in the 2D list
Create a Python function that takes a list of strings as input and returns a tuple containing the longest and shortest strings in the list
Write a function that takes a list of integers as input and returns the number of prime numbers in the list
You are given a list of strings. Write a Python function to remove any redundant strings from the list. A string is considered redundant if it can be formulated by repeating a substring. The function should return the list of non-redundant strings
Write a function that takes in a list of integers and returns a list of all prime numbers in the list
Write a Python function to find the longest common prefix in a list of strings. If there is no common prefix, the function should return an empty string
Write a Python function to find the maximum sum of a subarray within a given list of integers
You are given a list of tuples, where each tuple contains a key-value pair. Write a Python function to convert the list of tuples into a dictionary
Write a Python function that takes a string as an input and returns the string in reverse order
A game of hangman involves guessing a word by suggesting letters. Write a Python program that implements a simple version of hangman, with the word to be guessed and the guessed letters entered by the user
Design a Python function that takes a list of lists as input, where each inner list contains only two elements. The function should return a dictionary where the keys are the first elements of the inner lists and the values are the corresponding second elements
Write a Python function that takes a list of integers as input and returns the second largest element in the list
You are given a list of integers representing the heights of objects on a shelf. Write a function to find the maximum height that can be reached by stacking objects on top of each other, assuming that an object can be stacked on top of another object only if it is smaller.
Implement a function that takes a binary tree and returns the level with the maximum sum.
You are given a string of lowercase English letters. Write a program to find the longest substring with no repeating characters.
Write a function that takes a list of rectangles, where each rectangle is represented by a list of four integers [x, y, w, h], and returns the total area of all rectangles that do not overlap with any other rectangle.
Given a list of arrays, where each array represents a set of skills required for a job, and a list of arrays, where each array represents the skills that a candidate possesses, write a function to find the total number of jobs for which the candidate is qualified.
Write a Python function that takes a list of integers as input and returns the square of each integer in the list
Write a program to find the common elements between two lists of integers
Write a function that takes a dictionary as input and returns a new dictionary with the keys and values swapped
Write a Python program that takes a list of strings as input and returns a new list containing only the strings that start with a vowel
Write a function to calculate the average of all integers in a given list of integers
Write a Python function that takes a list of strings as an argument and returns the string with the maximum length
Create a class called Book that has attributes for the title, author, and publication year. The class should have methods to display the book information and to check if the book was published before a certain year
Write a Python function to find the second largest element in a list of numbers
Implement a stack in Python using a list. The stack should have methods to push, pop, and peek elements
Write a Python function to check if a given string is a palindrome
Write a Python function that takes a string as input and returns the string where all vowels are replaced with their corresponding uppercase vowels
Write a Python program to take a list of strings as input and return a new list with the strings sorted in reverse order
Write a Python function that takes two lists of integers as input and returns a new list containing elements that are common in both lists
Write a Python function that takes a list of integers as input and returns a dictionary with the count of each integer in the list
Write a Python program to calculate the average of all the numbers in a given list except for the maximum and minimum values
Write a Python program that takes a list of strings as an input and returns the count of the strings that start with a vowel
Given a dictionary of words and their meanings, write a function that returns a new dictionary that contains only the words that have more than one meaning
Write a function that takes a list of integers and returns the sum of all the numbers that are multiples of 3 or 5
Create a class Student with the following properties: student ID, name, GPA. The class should also have methods to update GPA and return the student's status (i.e., freshman, sophomore, junior, or senior) based on the GPA
Write a Python function that takes a string as an input and returns a new string that contains only the characters that appear in alphabetical order
Write a function `find_second_largest` that takes a list of integers as input and returns the second largest number in the list
Write a Python function `is_anagram` that takes two strings as input and returns `True` if the strings are anagrams of each other and `False` otherwise
Write a function `count_vowels` that takes a string as input and returns the total count of vowels in the string
Develop a Python program to find the maximum sum subarray in a given list of integers
Write a Python function `remove_duplicates` that takes a list of strings as input and returns a list of strings with duplicates removed
You are given a string of parentheses. Write a function to determine whether the parentheses are balanced and properly nested. For example, "(())" is balanced, but "(()" is not.
Given a list of strings, write a function to find the longest string and return its length.
You are given a list of integers and a target sum. Write a function to find all pairs of integers in the list that add up to the target sum.
Write a function to reverse all the words in a given sentence. For example, "Hello World" becomes "olleH dlroW".
Given a matrix represented as a list of lists, write a function to rotate it 90 degrees clockwise.
Write a Python function to find the frequency of each character in a given string and return a dictionary with characters as keys and their frequencies as values.
Implement a function that takes a list of strings as input and returns the string that has the longest length. If there are multiple strings with the same maximum length, the function should return the first one it encounters.
Write a Python function to check if a given string is a palindrome or not. If the string is a palindrome, the function should return True, otherwise False.
Implement a function that takes a list of integers as input and returns a new list with all the numbers in reverse order.
Write a Python function to find the average of all numbers in a given list. If the list is empty, the function should return 0.
Write a function to count the number of islands in a given 2D matrix of 0s and 1s, where 0s represent water and 1s represent land.
Given a string, write a Python function to check if it is a palindrome, ignoring spaces, punctuation, and case sensitivity.
You are given two strings, write a function to find the length of the longest common prefix.
Write a function to implement Binary Search on a sorted list of integers.
Write a function to reverse the order of words in a given string, where the words are separated by spaces.
Write a function that takes a list of tuples as input, where each tuple contains a name and an age, and returns a dictionary where the keys are the names and the values are the ages. For example, if the input is [('John', 25), ('Alice', 30), ('Bob', 25)], the output would be {'John': 25, 'Alice': 30, 'Bob': 25}.
Write a function that takes a string as input and returns the string with all vowels removed. For example, if the input is 'hello world', the output would be 'hll wrld'.
Create a function that takes two lists of numbers as input and returns a new list that contains only the numbers that are present in both input lists.
Write a function that takes a list of strings as input and returns the longest string in the list. If there are multiple longest strings, the function should return the first one it encounters.
Write a function that takes a dictionary as input and returns a new dictionary that contains only the key-value pairs where the key is a string that starts with an uppercase letter.
Create a function called `sum_of_evens` that takes a list of integers as an input and returns the sum of all even numbers in the list.
Write a Python program to find the nth Fibonacci number, where n is a positive integer.
Create a function that takes a list of strings as an input and returns a new list with all strings converted to uppercase.
Write a function that takes three arguments: a list of integers, an integer to search for, and an integer to replace it with. The function should return a new list with all occurrences of the search integer replaced with the replacement integer.
Create a function called `is_palindrome` that takes a string as an input and returns true if the string is a palindrome (i.e., it reads the same backwards and forwards), and false otherwise.
Implement a Python function named has_unique_chars that takes a string as input and returns True if the string contains all unique characters, False otherwise
Write a function that takes in a list of integers and returns the count of even numbers in the list
Create a function that takes a string and an integer as input, and returns the string repeated the given number of times
Write a Python function that takes a list of strings as input and returns the longest string in the list. If there are multiple strings of the same maximum length, return the first one encountered
Write a function that takes a list of integers as input and returns the count of prime numbers in the list
Write a Python function that takes a string as an argument and returns the count of vowels in the string
Write a Python function to check if a given number is a palindrome
Create a Python function that can convert a given binary number into a decimal number
Implement a Python function to calculate the average of a list of numbers
Write a Python function to find the second largest number in a list of numbers
You are given a set of intervals. Write a function to merge overlapping intervals and return the merged intervals
Write a Python function to remove duplicates from a given list while preserving the original order of elements
Write a function that takes a list of strings as input and returns the string with the longest length
Write a function that takes a list of integers as input and returns True if the list contains exactly two distinct elements, False otherwise
Write a function that takes a list of tuples as input, where each tuple contains two integers representing a point in 2D space. The function should return the point that is closest to the origin (0, 0)
Create a Python function that takes a string as input and returns the string with all vowels removed
Write a Python function that takes a list of tuples as input, where each tuple contains a student's name and their grade. The function should return a dictionary where the keys are the grades and the values are lists of student names
Write a Python function that takes a list of integers as input and returns the count of all prime numbers in the list
You are given a dictionary where the keys are country names and the values are their capitals. Create a Python function that prints the capital of a given country
Write a Python function that takes a string as input and returns the string with all uppercase characters converted to lowercase and all lowercase characters converted to uppercase
Write a Python function that takes in a list of strings and returns the longest string in the list
Implement a Python function to compute the sum of all the squares of the numbers in a given list of integers
Write a Python function that takes a list of dictionaries as input and returns a new dictionary that is the result of merging all the input dictionaries
Write a Python program that defines a class called "Circle" with attribute "radius" and method "circumference"
Write a Python function that takes in a list of integers and returns the list of integers in reverse order
Write a function that takes a list of numbers as input and returns the list sorted in descending order
Design a program that takes a string as input and returns the count of characters that are in uppercase
Write a function to remove the first and last element from a list. The function should return the modified list
You are given a dictionary with keys as strings and values as boolean values. Write a function that returns a list of keys that have a value of True
Design a Python function that accepts a list of integers as input and returns the maximum difference between any two elements in the list
Write a function that takes a 2D list as input and returns the total sum of all elements in the list
Write a function that takes a string as an input and returns the number of sequences of three identical characters in a row
Write a function that takes a list of integers as input and returns the average of all the numbers in the list, rounded to two decimal places
Write a function that takes a dictionary where the keys are words and the values are the frequencies of the words as input, and returns a list of all words that appear more than once
Write a function that takes a list of strings as input and returns the longest string in the list
Given a list of strings `words` and an integer `max_width`, return a list of strings, where each string represents a line in the output. You may assume that each input would have exactly one solution and you may not use the same word twice. You can return the answer in any order
Create a function count_substring that takes a string `s` and a substring `sub` as input, and returns the number of times the substring appears in the string
Implement a Python function named is_prime that takes an integer `n` as input, and returns True if `n` is a prime number, False otherwise
Write a function that takes a list of integers `nums` and an integer `k` as input, and returns a list of all pairs of numbers in `nums` that add up to `k`
Write a Python function that takes a string `s` as input and returns the string with all vowels removed
Write a Python function that calculates the Euclidean distance between two points in a 2D space given their coordinates as input parameters
Implement a function that takes a string as input and returns a new string with all vowels removed
Create a function that takes a list of strings as input and returns the string that appears most frequently in the list
Design a function that takes a list of integers as input and returns the sum of all even numbers in the list
Implement a function that takes a string as input and returns True if the string is a palindrome, False otherwise
Write a function that takes in a list of integers and returns a list of integers without duplicates
Develop a Python function that takes a string as input and returns the string with all uppercase characters converted to lowercase
Write a Python function that takes two lists as input and returns a set of elements that are present in both lists
Create a Python function that takes a list of integers as input and returns the sum of all positive integers in the list
Write a Python program that prints all the numbers from 1 to 100 that are not divisible by 3 or 5
Write a function that takes a string as input and returns the string with all vowels removed.
Write a Python function that takes a list of tuples as input, where each tuple contains a string and an integer. The function should return a list of strings, sorted by the integer values in descending order.
You are given a dictionary where the keys are strings and the values are lists of integers. Write a function to find the maximum sum of a list in the dictionary.
Write a Python function to find the longest common prefix among a list of strings.
Write a function that takes a list of integers as input and returns a new list with all duplicates removed.
Write a program that takes a list of strings as input and returns a new list containing only the strings that have a length of 5 or more.
Write a function that takes a set of integers as input and returns the sum of the squares of all the integers in the set.
Write a Python program that implements a Caesar Cipher. The Caesar Cipher is one of the simplest and most widely known encryption techniques. It is a type of substitution cipher where each letter in the plaintext is 'shifted' a certain number of places down the alphabet. The user should be able to input the string they want to encrypt, as well as the shift number.
Write a function that takes a list of integers as input and returns the second largest integer in the list. If the list has less than two unique elements, the function should return None.
Write a program that takes a string as input from the user and then counts the number of occurrences of each word in the string. The program should return a dictionary where the keys are the words from the string and the values are the number of times each word appears.
Write a function that takes a list of strings as input and returns the count of all strings that start with the character 'A'.
Write a program that can simulate a simple weather forecasting system. It should have the following functionalities: ability to input weather data, display current weather, and forecast weather for the next 3 days.
Write a function called find_largest that takes a list of integers as input and returns the largest number in the list. For example, if the input is [1, 2, 3, 4, 5], the function should return 5.
Write a Python function that takes a sentence as input and returns the frequency of each word in the sentence, excluding common articles like 'the', 'a', 'an'.
Write a function that takes a dictionary as input and returns the sum of all the values in the dictionary.
Write a function that takes a string as input and returns the string with all vowels removed
You are given a list of lists where each inner list represents a student's scores in different subjects. Create a Python function that returns the list sorted by the average score of each student in ascending order
Write a Python function that takes a dictionary as input where the keys are names of movies and the values are the ratings of the movies. The function should return a new dictionary where the keys are the ratings and the values are lists of movie names with that rating
Implement a Python function that takes a list of words as input and returns the number of words that start with a vowel
Write a function that takes a list of integers as input and returns the sum of all prime numbers in the list
Given a list of strings, return a new list that contains the strings in upper case.
Write a function that takes in a list of integers and returns the average of all the numbers in the list. If the list is empty, the function should return 0.
Create a Python program that takes a string as input and returns True if the string is a palindrome, False otherwise.
Write a Python function that takes in a list of integers and returns the maximum number in the list. If the list is empty, the function should return None.
A customer has a bill of $100 and pays with a $200 bill. Write a Python function that takes the amount of the bill and the amount the customer pays as input, and returns the change in dollars and cents.
A certain company has a policy of paying a 10% raise to employees whose salary is below $100,000. Write a Python function that takes an employee's salary as input, and returns the new salary after applying the raise rule.
Write a Python function that takes a list of words as input and returns the longest word in the list.
A password is considered strong if it has at least 6 characters, contains at least one uppercase letter, one lowercase letter, and one digit. Write a Python function that takes a password as input and returns True if it is strong, False otherwise.
Write a function to check if a given string is a palindrome. For example, "madam" is a palindrome but "hello" is not
Given a list of integers, write a function to find the maximum difference between two elements in the list such that the larger element appears after the smaller element
Write a function that takes a string as input and returns the string with all occurrences of consecutive repeated characters removed. For example, "helloooo" becomes "helo"
Write a function to calculate the average of a list of numbers. The function should handle both integers and floating-point numbers
Given a sorted list of integers, write a function to find the first occurrence of a specific integer in the list
Write a function that takes a list of integers as input and returns the list with all duplicates removed
Write a Python program that takes in a dictionary as an input and returns a new dictionary with all keys in lowercase
Write a function that takes in a string as an input and returns the string with all characters after the third occurrence of the substring 'abc' removed
Write a Python function that takes a list of lists as input and returns a new list containing all elements that are present in at least two inner lists
Write a function that takes in a list of integers as input and returns the maximum value of the sum of three consecutive elements in the list
Write a Python function that accepts a string as input and returns the string with all vowels removed.
Write a Python function to check whether a given year is a leap year or not.
Write a Python function to calculate the sum of the squares of all numbers in a given list of integers.
Write a Python program that takes a list of strings as an input and returns a new list that contains only the strings that start with a vowel.
Write a Python function that takes a list of numbers as input and returns a tuple where the first element is the maximum number in the list, the second element is the minimum number in the list, and the third element is the average of all numbers in the list.
Create a function that takes a list of strings as input and returns the count of strings that start with a vowel.
Write a function to find the smallest number in a list that is greater than a given target number. If no such number exists, return -1.
Develop a function that takes a list of integers and returns a new list containing the squares of all numbers in the original list.
Create a function that takes a list of integers and returns the count of numbers that are greater than their adjacent neighbors.
Write a function to find the longest sequence of consecutive integers in a list. If there are no consecutive integers, return an empty list.
Design a Python function that takes a list of strings as input and returns a new list where all the strings have been converted to uppercase
Write a function to calculate the factorial of a given positive integer
Write a Python function to reverse the order of characters in a given string
Write a function to calculate the number of vowels in a given string
Design a Python function that takes a list of integers as input and returns a new list containing only the even numbers
Write a Python function to convert a given list of integers into a binary search tree.
Given a list of strings, write a Python function that returns the longest string in the list.
Write a Python function that takes a list of numbers as input and returns the average of the even numbers in the list.
Write a Python function that takes a string as input and returns a boolean indicating whether the string is a palindrome or not.
Write a Python function that takes a list of integers as input and returns a new list with duplicate integers removed.
Write a function that takes a list of integers as input and returns the maximum sum of a contiguous subarray within the list.
Write a Python function to calculate the nth Fibonacci number, where n is a positive integer.
Write a Python program to create a function that takes a string as input and returns the string with all vowels removed.
Given a dictionary where the keys are strings and the values are lists of integers, write a function to find the key with the longest list of integers.
Write a Python function that takes a list of strings as input and returns a new list with all strings in uppercase.
Write a function that takes a list of strings as input and returns the list sorted in alphabetical order.
Implement a Python function that takes a set of integers as input and returns the number of prime numbers in the set.
Write a function that takes a string as input and returns the string with all uppercase letters converted to lowercase.
Implement a Python function that takes a dictionary as input and returns the sum of all values in the dictionary.
Write a function that takes a list of integers as input and returns the list with all elements multiplied by 2.
Write a function that accepts a list of integers as input and returns True if the list is sorted in ascending order, and False otherwise
Write a function to find the total sum of nodes in a linked list. The input to the function will be the head of the linked list and the output will be an integer which is the total sum of nodes in the linked list. A linked list can be represented as a Node class where Node.val is the value at the node and Node.next is the next node in the list
Write a function that takes a string as input and returns the count of words in the string where a word is a sequence of characters separated by spaces
Develop a Python function that accepts a list of tuples as input, where each tuple contains two integers, and returns the count of tuples where the first integer is greater than the second integer
Write a program that takes in a list of strings as input and returns the concatenated string
Create a function that takes in a list of integers as input and returns the count of the numbers that are greater than 5.
Write a function to find all the prime numbers in a given list of numbers. The function should return a new list containing only the prime numbers.
Given a list of integers, write a function to return the sum of all even numbers that are greater than 10.
Create a function that takes a string as input and returns the count of all vowels in the string. The function should be case-insensitive.
Write a function that takes a list of lists as input and returns the maximum length of any sublist.
Write a Python function that takes a list of strings as input and returns a new list that contains the strings in reverse order
You are given a list of integers and you need to write a Python function that returns the frequency of each integer in the list as a dictionary
Write a Python function that takes a string as input and returns the string with all vowels removed
Write a Python program that calculates the total count of even numbers in a list of integers
Create a function that takes a list of numbers as input and returns the count of even numbers in the list
Write a Python function that takes a string as input and returns the number of words in the string
You need to write a Python function that takes a list of strings as input and returns a new list that contains only the strings that start with a consonant
Write a function that takes a dictionary as input where the keys are names and the values are ages, and returns a new dictionary where the keys are the ages and the values are lists of names of people of that age
Write a Python function that takes a list of tuples as input where each tuple contains a student's name and grade, and returns a new list of tuples sorted by the student's grade in descending order
Write a function that takes a list of integers as input and returns the sum of all even numbers in the list
Create a function that takes a string as input and returns the string with all vowels removed
Write a function that takes a list of lists as input and returns the maximum length of a sub-list
Implement a Python function to check if a given list contains duplicate consecutive elements. The function should return True if the list contains duplicate consecutive elements, and False otherwise
Write a function that takes a list of integers as input and returns a new list containing only the integers that appear exactly once in the original list
Write a function that accepts a list of strings as input and returns the string with the maximum length. If there are multiple strings with the same maximum length, return the first one encountered
Create a Python function that takes a list of integers as input and returns True if the list contains at least one triplet of elements that add up to zero, and False otherwise
Write a function 'filter_even_numbers' that takes a list of integers as input and returns a new list containing only the even numbers from the original list
Create a Python program to find the most frequent element in a given list of integers
Write a function that takes a dictionary of student names and their corresponding ages as input and returns the name of the student with the highest age
Write a Python function that takes a list of strings as input and returns the strings in sorted order ignoring case.
Create a Python function that takes a list of integers as input and returns the count of all numbers that are divisible by 3 or 5.
Write a Python function that takes a string as input and returns the string with all occurrences of a specific substring removed.
Write a Python function that takes a list of integers as input and returns the average of all the numbers in the list.
Create a Python function that takes a string as input and returns the string with all characters converted to uppercase.
Write a Python function to find the longest common prefix among a list of strings.
Create a function that takes a list of integers as input and returns the count of odd numbers in the list.
Write a Python program that takes a dictionary as input and returns a new dictionary where all keys and values are swapped.
Write a Python class to represent a rectangle with attributes for its width and height. The class should have a method to calculate the area of the rectangle.
Given a list of numbers, write a Python function to find the second largest number in the list.
Create a function that takes a list of strings as input and returns the string that appears most frequently in the list. If there are multiple strings with the same highest frequency, the function should return the first string it encounters in the list
Write a function that takes a list of tuples, where each tuple contains two integers, and returns a new list with the tuples sorted in ascending order based on the first integer in each tuple
Write a function that accepts a list of strings as input and returns True if all strings in the list are in uppercase, False otherwise
Write a Python program to find the second largest number in a given list of integers
Write a class called "Circle" with attribute "radius" and methods "area" and "circumference"
Create a Python function to find the maximum value in a given list of numbers and return its index. If there are multiple maximum values, return the index of the first occurrence.
Write a function that takes a list of integers as input and returns the sum of all the even numbers in the list.
Design a Python function to check if all elements in a given list are identical. The function should return True if all elements are identical and False otherwise.
Create a Python function that accepts a list of strings as input and returns a new list with all strings converted to uppercase.
Write a Python function to find the number of times a specific element appears in a given list. The function should take two parameters: the list and the element to be searched.
Create a function `find_max_duplicate` that takes a list of integers as input and returns the maximum duplicate value in the list. If there are no duplicates, return -1
Write a Python function `convert_to_euros` that takes a dictionary of currencies with their corresponding exchange rates as input. The function should return a new dictionary where the values are converted to euros
You are given a string containing parentheses and you need to write a function `is_balanced` that returns `True` if the parentheses are balanced and `False` otherwise
Create a function `calculate_sum_pairs` that takes a list of integers as input and returns the sum of all pairs of adjacent elements in the list
Write a function `encode_string` that takes a string as input and returns the encoded string where each character is replaced by its corresponding ASCII value surrounded by square brackets
Write a Python function that takes a list of integers as input and returns the count of even numbers in the list.
Write a function that accepts a string as input and returns the string in reverse order.
Create a Python function to find the average of all the numbers in a given list.
Develop a Python function that takes a list of strings as input and returns the longest string in the list.
Write a Python function to calculate the factorial of a given integer.
Write a Python function that takes a list of tuples as input and returns a dictionary where the first element of each tuple is the key and the second element is the value.
Create a Python function to find the number of occurrences of a given substring in a string.
Write a Python function that accepts a list of integers as input and returns a new list with all duplicates removed.
Develop a Python function that takes a string as input and returns the count of vowels in the string.
Write a Python function to check if a given string is a palindrome, ignoring case and non-alphanumeric characters.
Write a Python program to find the maximum difference between two elements in an array, where the larger element appears after the smaller element.
Write a function that takes a list of integers as input and returns the frequency of each integer in the list.
Write a Python function to convert a given binary number to its decimal equivalent.
Implement a function that takes a string as input and returns the string in reverse order, ignoring all non-alphanumeric characters.
Write a Python program to determine whether a given number is a prime number or not.
Write a Python function that takes a set of coordinates in the format (x, y) as input and calculates the Euclidean distance between them. The function should return the result rounded to two decimal places
Implement a Python function that takes a string as input and returns the string with all vowels removed. The function should be case-insensitive, i.e., it should remove both lowercase and uppercase vowels
Write a Python function that takes a list of lists as input and flattens it into a single list. The function should handle lists of arbitrary depth
Write a Python function that takes a dictionary as input and returns a new dictionary with all keys and values swapped. If a value appears multiple times in the input dictionary, it should appear only once in the output dictionary
Implement a Python function that takes a string as input and returns the longest word in the string. If there are multiple longest words, the function should return the first one it encounters
Write a function that takes a list of integers as input and returns the median of the list. If the list is empty, the function should return None.
You are given a list of tuples where the tuples contain information about a person (name, age, height). Write a function to sort the list in descending order based on height.
Implement a class called `Rectangle` with attributes `length` and `width`, and methods `area` and `perimeter`. The `area` method should return the area of the rectangle, and the `perimeter` method should return the perimeter of the rectangle.
Write a function that takes a string as input and returns the string with all vowels removed.
You are given a list of lists where each sublist represents a row in a matrix. Write a function to transpose the matrix.
Write a Python function that takes a list of numbers as input and returns the average of all the numbers in the list. If the list is empty, return 0.
Given a string, write a function that returns the string with all vowels removed. For example, if the input is "hello world", the function should return "hll wrld".
Write a Python program to calculate the factorial of a given integer. For example, if the input is 5, the function should return 120.
You are given a list of strings as an input, write a function that returns the total number of characters in all the strings.
Write a Python function that takes a list of integers as input and returns the product of all the integers in the list. If the list is empty, return 1.
Write a Python function that takes a list of strings as input and returns the longest string in the list. If there are multiple strings of the same maximum length, return the first one encountered.
Design a program that takes a list of integers and a target sum as input, and returns a list of all pairs of indices (i, j) where the corresponding elements in the list add up to the target sum.
Implement a function that takes a string as input and returns the string with all vowels removed. For example, if the input is "Hello World", the output should be "Hll Wrld".
Write a Python function that takes a list of tuples as input, where each tuple represents a point in 2D space (x, y). The function should return a new list of tuples representing the points in ascending order of their distances from the origin (0, 0).
Design a program that takes a dictionary as input and returns a new dictionary with the keys in alphabetical order. If two keys are identical except for case, the function should raise a ValueError.
Write a function to find the last occurrence of a substring in a string.
Write a function that takes a string as input and returns a substring from the first occurrence of a punctuation mark to the end of the string.
Develop a Python program to find the intersection of two lists of integers.
Implement a Python function that takes a string as input and returns the number of characters that appear only once.
Write a function that takes a list of integers as input and returns the second largest element. If there is no second largest element, return -1.
Develop a Python function that takes a list of strings as input and returns the most frequently occurring string. If there is a tie, return the first string encountered.
Write a function that takes in a list of strings and returns a new list containing only the strings that start with a vowel
Write a Python function that takes a list of integers as input and returns the count of all prime numbers in the list
Create a Python function that takes two lists of integers as input and returns True if the sum of both lists is equal, and False otherwise
Write a function that takes a list of integers as input and returns a new list containing only the integers that are greater than their preceding integer in the list
Create a Python function that takes a string as input and returns the string with all occurrences of the first character replaced with '#'
Write a Python program to find the first duplicate in a given list of integers.
Implement a Python function named is_palindrome that takes a string as input and returns True if the string is a palindrome, False otherwise.
Create a Python program that determines whether a given password is strong or not. The password is considered strong if it contains at least one lowercase letter, one uppercase letter, one digit, and has a length of at least 8 characters.
Write a Python function to find all pairs of elements in a given list that add up to a specified target sum.
Write a Python function that takes a list of strings as input and returns a new list with all strings converted to lowercase
Write a Python program that reads a string input from the user and checks if it is a palindrome, i.e., it reads the same backward as forward
Write a Python function that takes two lists as input and returns a new list that contains only the elements that are common to both lists
Write a Python function that takes a list of floating-point numbers as input and returns the product of all numbers in the list
Write a Python function that takes a list of tuples, where each tuple contains a name and an age, and returns a new list sorted in descending order by age
Write a Python program to find the maximum element in each sublist of a given list of lists.
Write a function that takes a string as input and returns the frequency of each character in the string.
Write a function that takes a list of dictionaries as input and returns a new dictionary where each key is a key from one of the dictionaries and its corresponding value is the sum of the values of that key across all dictionaries.
Write a function that takes a list of integers as input and returns the count of prime numbers in the list.
Write a function that takes a string as input and returns True if the string is a palindrome, False otherwise.
Create a Python function that takes a list of strings as input and returns a new list with all the strings converted to lowercase. For example, if the input list is ["HELLO", "WORLD", "PYTHON"], the output should be ["hello", "world", "python"].
Write a Python program to calculate the total cost of items in a shopping cart. The program should prompt the user to input the prices of three items and then display the total cost.
Write a Python function that takes a string as input and returns the number of vowels in the string. For example, if the input string is "hello", the output should be 2.
Create a Python function that takes a list of integers as input and returns a new list with all the duplicates removed. For example, if the input list is [1, 2, 2, 3, 4, 4, 5], the output should be [1, 2, 3, 4, 5].
Write a Python program to create a function `is_prime` that takes an integer as input and returns `True` if the number is prime, and `False` otherwise.
Create a function that performs {op} on a {dt1} and a {dt2} and returns the result using {c}.
Write a Python function to compute the maximum sum of a subarray within a two-dimensional array of numbers.
Write a Python program to find all elements in a list that are present in a given range.
Write a function to find the most frequent character in a given string.
Write a Python function to reverse the words in a given string while keeping the order of words unchanged.
You need to write a function that takes a string as input and returns the string with all uppercase characters replaced with their lowercase counterparts. For example, if the input string is "HeLlO", the function should return "hello".
Write a Python function that takes a list of strings as input and returns a new list where all strings have been reversed.
Write a Python function that takes a dictionary as input and returns a new dictionary where all key-value pairs have been swapped.
Write a function that takes a list of numbers as input and returns the maximum value in the list.
Write a function that takes a list of strings as input and returns a new list containing only the strings that start with a vowel.
Write a Python program that reads a list of integers and returns the sum of all the prime numbers in the list.
You are given a list of tuples, where each tuple contains a student's name and their score. Write a Python program to sort the list in descending order based on the scores.
Write a Python function that takes a list of strings as an argument and returns a new list with all the strings converted to uppercase.
You are given a string that contains a list of names separated by commas. Write a Python program to sort the list of names in alphabetical order and return the sorted list.
Write a Python program that takes a list of integers as input and returns a new list with all the duplicates removed.
Create a program that prompts the user for their favorite book and author, then prints out a formatted string displaying the input information
Write a function in Python that takes a list of integers as input and returns a list of squares of each number in the list
Implement a function in Python that takes a string of comma-separated numbers as input and returns a list of floats
Develop a Python program that takes a list of strings as input and returns the string that comes first alphabetically
Develop a Python function to find the maximum element in a list of lists, where the sublists contain only integers
Write a Python program that takes a string as input and returns True if it contains at least three vowels, False otherwise
Write a function that takes a list of integers as input and returns a tuple containing the maximum and minimum values in the list
Given a dictionary where the keys are strings and the values are integers, write a function that returns a list of keys sorted by their corresponding values in descending order
Write a Python function that takes a list of strings as input and returns the longest string in the list
Given a list of integers, write a function that returns the product of all the numbers in the list
You are given a set of strings. Write a function to find the longest common prefix among all the strings
Write a function to check if a given number is a power of two, and return True or False accordingly
You are given a list of integers. Write a function to find and return the maximum difference between any two elements in the list, considering the smaller element comes first in the original list
Implement a Python function that takes a string as input and returns the string with all vowels removed
Write a function that takes a list of strings as input and returns the list sorted in alphabetical order, with all lowercase strings coming before all uppercase strings
Write a function that takes in a string and returns the string with all vowels removed
You are given a dictionary where the keys are the names of students and the values are their respective ages. Write a function that returns the name of the oldest student
Create a program that takes a list of tuples as input and returns a list of the second elements of the tuples
Write a function called 'min_max_sum' that takes a list of integers as input and returns the sum of the smallest and largest numbers in the list
You are given a string that represents a time in 24-hour format. Write a function that converts the time to 12-hour format
You are given a list of integers and you need to return the second maximum element in the list. If there are multiple second maximum elements, return any one of them. If there is no second maximum element, return None
You are given a dictionary where keys are names of students and values are their corresponding grades. Create a Python function that returns a new dictionary that has the students sorted by their grades in descending order
Write a Python function that takes a list of strings as input and returns the string that has the maximum length. If there are multiple strings with the same maximum length, return any one of them
You are given a list of intervals where each interval is represented as a tuple of two integers. Create a Python function that merges overlapping intervals and returns the merged intervals
Write a Python function that takes a string as input and returns the string with all vowels removed
You are given a list of integers and a target sum. Create a Python function that returns a tuple of two indices such that the elements at those indices in the list add up to the target sum. If there is no such pair, return None
You are given a string of parentheses. Write a function to determine whether the string is a valid sequence of parentheses
Write a Python function that takes a string as input and returns the string with all vowels removed
You are given a list of integers. Write a function to find the first duplicate in the list. If there is no duplicate, the function should return None
Write a Python function that takes a list of integers as input and returns the maximum sum of a contiguous subarray within the array
You are given a dictionary where the keys are names of students and the values are their scores. Write a function to find the name of the student with the highest score. If there are multiple students with the same highest score, the function should return all their names
Write a Python program to find the average of all the numbers in a given list.
Write a function to find the longest word in a given sentence. If there are multiple longest words, return the first one.
You are given a list of dictionaries where each dictionary contains information about a person such as their name, age, and occupation. Write a Python function that takes this list as input and returns a new list containing only the names of people who are older than 30.
Write a Python function to calculate the number of times each word appears in a given sentence. The function should ignore case and punctuation.
Write a Python program to find all the common elements in two given lists. The function should return a new list containing these common elements.
Given a list of strings, write a Python function that returns a set containing all unique substrings of length 2.
Write a Python function that computes and returns the geometric mean of a list of numbers.
Given a list of integers, write a Python function that returns a dictionary where keys are the integers and values are their squares.
Write a Python function that takes a string as input and returns the number of vowels in the string.
Given a list of lists, write a Python function that returns a single list containing all the elements from the sublists.
Write a function find_divisible_numbers that takes a list of integers and an integer divisor as input, and returns a list of numbers from the input list that are divisible by the divisor
Create a program that takes a list of strings as input and returns a new list that contains strings with a length greater than 5 characters
Write a Python program that takes a list of integers as input and returns the count of numbers that are greater than the median of the list
Create a program that takes a dictionary as input, where the keys are student names and values are lists of their respective grades, and returns a new dictionary where the values are the averages of the grades for each student
Write a function find_distinct_primes that takes a list of integers as input and returns a list of distinct prime numbers in the list
Develop a Python function to find the longest string in a list of strings
Write a Python program to create a function that determines whether a given year is a leap year or not
Design a Python function to take a list of strings as input where each string represents a person's name, and return a new list with only the names that have more than one word
Create a function that takes a dictionary as input and returns a new dictionary with only the key-value pairs where the value starts with a capital letter
Write a Python function that takes a list of lists of integers as input and returns the maximum value across all the lists
Write a function that takes a list of integers as input and returns the count of all the even numbers in the list
Given a dictionary where the keys are strings and the values are integers, write a function that returns a new dictionary where the keys are the same, but the values are the squares of the original values
Write a Python function that takes a string as input and returns True if the string starts with a vowel, False otherwise
Given a list of lists of integers, write a function that returns a new list where each sublist contains the maximum value from the corresponding sublist in the input list
Write a function that takes a list of strings as input and returns the count of strings that contain at least one uppercase letter
Create a function that calculates the factorial of a given number and returns the result
Write a Python function that accepts a list of strings as input and returns the longest string among them
Write a Python program that takes a list of integers as input and finds the maximum and minimum values in the list, returning them as a tuple
Create a class called "Circle" with attributes "radius" and methods "area" and "circumference"
Write a Python program that takes a string as input and returns the string with all occurrences of a specific character replaced with another
Write a Python function that takes a list of integers as input and returns the count of numbers that are greater than their neighbors.
Design a Python program that accepts a string as input and returns all possible substrings of the string.
Create a Python function that takes a list of dictionaries as input, where each dictionary represents a student's profile, and returns the dictionary of the student with the highest grade point average (GPA).
Write a Python function that takes a list of integers as input and returns the maximum consecutive sum of integers in the list.
Given a set of points on a 2D plane, write a function to determine if three or more points are collinear.
Write a Python function to find the maximum difference between any two elements in a given list.
Implement a Python program to count the number of occurrences of each word in a given string and store the result in a dictionary.
You are given a 3x3 matrix as a list of lists in Python. Write a function to find the sum of the diagonal elements.
Write a Python function to find all the palindromic substrings in a given string.
Given a list of integers, write a function to find the count of elements that are greater than the average of the list.
Write a function to check if a given number is a palindrome or not. The function should take an integer as input and return True if it is a palindrome, False otherwise
Write a program that takes a list of strings as input and returns a list of strings where each string is in uppercase
Create a Python function that takes a list of integers as input and returns a new list with all even numbers removed
Write a function that takes a string as input and returns the longest substring that starts and ends with the same character
Write a program that takes in a list of integers and returns the maximum sum of a subarray in the list
Write a function that takes a list of tuples as input, where each tuple contains a name and a grade, and returns a new list containing only the names of students who have a grade above 90.
Given a string, write a function that returns the string with all vowels reversed (i.e., 'a' becomes 'u', 'e' becomes 'o', etc.).
Write a function that accepts a list of numbers as input and returns the minimum and maximum values in the list.
Implement a function that takes a list of strings as input and returns a new string that is the concatenation of all the strings in the reverse order.
Write a function that takes a number as input and returns the sum of its digits.
Write a Python function to count the number of strings in a given list where the string length is 2 or more and the first and last characters are the same. For example, if the input list is ["abba", "bb", "cd"], the output should be 2
Create a Python program to find the square root of a given number using the Newton-Raphson method
Write a Python function that takes a list of numbers as input and returns a new list with all the numbers in reverse order, but without using the built-in reverse function or slicing
Write a Python program that takes a sentence as input from the user and counts the number of words in the sentence
Write a Python function that takes a number as input and returns True if the number is a palindrome, False otherwise. A palindrome is a number or a text phrase that reads the same backwards as forwards
Create a function that takes in a string as input and returns a new string where all the vowels are removed from the input string
Write a function to print the first 10 Fibonacci numbers
Implement a Python function that takes a dictionary as input and returns a list of all the keys in the dictionary
Write a function that takes a list of strings as input and returns the string with the maximum length
Write a Python function to calculate the average of all the elements in a given list
Implement a Python function named contains_subsequence that takes two lists as input and returns True if the first list contains the second list as a subsequence, False otherwise.
Write a function that takes a dictionary as input and returns a new dictionary with the keys and values swapped. For instance, if the input is {'a': 1, 'b': 2}, the output should be {1: 'a', 2: 'b'}.
Design a Python function that takes a list of integers as input and returns a new list with the elements sorted in descending order.
Implement a function that takes a single string input and returns the string with all vowels removed. For example, if the input is "Hello World", the output should be "Hll Wrld".
Write a function that takes a list of strings as input and returns a new list containing only the strings that are at least 5 characters long.
Create a class called Vehicle that has attributes for the vehicle's make, model, and color. The class should have methods to accelerate and brake, and a method to display the vehicle's information.
Write a Python program to count the number of vowels in a given string.
Design a Python function that takes a list of numbers as input and returns the list in reverse order. For example, if the input is [1, 2, 3, 4, 5], the output should be [5, 4, 3, 2, 1].
Write a Python function that takes a list of strings as input and returns the list sorted in alphabetical order.
Create a Python class called Student that has attributes for the student's name, ID, and GPA. The class should have methods to update the GPA and display the student's information.
Write a function that accepts a list of words and returns the number of words that start with a capital letter
You are given a string of parentheses. Write a function that checks if the string is a valid sequence of parentheses
Implement a function that calculates the sum of all the elements in a list of lists
Write a function that takes a string as input and returns the string with all vowels removed
Create a Python function that takes a list of integers as input and returns the number of prime numbers in the list
Write a Python function that takes a dictionary as input and returns the sum of all the values in the dictionary
Implement a Python function named has_duplicates that takes a list of integers as input and returns True if the list contains duplicate elements, False otherwise
Create a Python function that takes a list of strings and returns the longest string in the list
Implement a Python program that takes a string as input and returns the string with all vowels removed
Write a function that takes a list of integers as input and returns a new list containing only the odd numbers from the original list
Write a function that takes a string as input and returns the string with all vowels removed.
Write a function to find the minimum absolute difference between any two elements in a list of integers.
Write a Python function that takes a list of strings as input and returns the list with all strings reversed.
Write a function to find the count of prime numbers in a given list of integers.
Write a Python function to merge two sorted lists of integers into a single sorted list.
Implement a function that takes as input a list of strings and returns a list of tuples, where each tuple contains a string and its length
Define a function that takes as input a list of integers and returns a new list that includes only the numbers that are perfect squares
Write a Python program that takes as input a string and returns the string with all the occurrences of a specified substring replaced with another substring
Write a function to find the longest common prefix among a list of strings
Implement a function that takes as input a list of integers and returns a list of their cumulative sums
Create a function that takes a list of strings and returns the concatenated string.
Write a function that takes a list of integers as input and returns the count of numbers that are divisible by 5.
Write a function that takes a dictionary as input, and returns a new dictionary where the values are the keys and the keys are the values of the original dictionary, but only for keys that have a length of 5 characters.
Given a list of integers, return the maximum difference between any two elements in the list.
Write a function that takes a list of lists as input and returns a new list that contains the first element of each inner list.
Write a function that takes in a list of strings and returns a list of all the strings that contain the letter "e".
Write a function that takes in a list of integers and returns the number of elements in the list that are greater than their predecessors. For example, if the input is [1, 2, 3, 4, 3, 2, 1], the function should return 3.
Write a function that takes in a list of integers and returns a list of all the prime numbers in the list.
Write a function that takes in a list of tuples, where each tuple represents a person's name and age. The function should return a list of all the people's names who are above 18 years old.
Write a function that takes in a list of integers and returns the maximum sum of a contiguous subarray within the list.
Write a Python program to check if a given string is palindrome or not
Define a function that takes a list of strings as input and returns the longest string in the list
Write a Python function that takes two lists of integers as input and returns a new list with the merged sorted list
Write a function that takes a dictionary as input and returns a new dictionary with all keys converted to upper case
Write a Python function that takes a list of integers as input and returns the sum of all the even numbers in the list
[truncated: 5,925 more rows]
