# Supplementary material
Source: ML conference proceedings conference paper supplement (https://openreview.net/forum?id=8mM5NzC7da)
Supplement: supplementary_material [file OOD_samples_llama-3-70b-instruct_code_augmented_beaver-withresponses.xlsx]

## Sheet: Sheet
Questions	Answers
Write a Python function that takes a list of integers as input and returns the count of all odd numbers in the list.	def count_odd_numbers(numbers): count = 0 for num in numbers: if num % 2 != 0: count += 1 return count
Write a Python function to find the minimum value in a list of integers.	def find_min_value(numbers): return min(numbers)
Write a Python function that takes a list of strings as input and returns a new list that contains all strings in uppercase.	def convert_to_uppercase(strings): return [s.upper() for s in strings]
Write a Python function to find the average of all numbers in a list of integers.	def calculate_average(numbers): return sum(numbers) / len(numbers)
Write a Python function that takes a list of strings as input and returns a new list that contains all strings with their vowels removed.	def remove_vowels(strings): vowels = 'aeiouAEIOU' return [''.join([char for char in s if char not in vowels]) for s in strings]
Write a Python function that takes a list of strings as input and returns the longest string in the list.	def longest_string(lst): longest_str = max(lst, key=len) return longest_str
Write a Python function that takes a list of integers as input and returns the average of all the numbers in the list.	def average(lst): if len(lst) == 0: return 0 else: return sum(lst) / len(lst)
Create a Python function that takes a list of integers as input and returns the list sorted in descending order.	def sort_desc(lst): return sorted(lst, reverse=True)
Write a Python function that takes a list of integers as input and returns the maximum difference between any two numbers in the list.	def max_diff(lst): return max(lst) - min(lst)
Write a Python function that takes a list of integers as input and returns True if the list is in descending order and False otherwise.	def is_desc(lst): return all(lst[i] >= lst[i + 1] for i in range(len(lst) - 1))
Write a function that takes a list of integers and returns True if the list is in ascending order and False otherwise.	def is_ascending(given_list): return all(given_list[i] <= given_list[i + 1] for i in range(len(given_list) - 1))
You are given a string and you need to write a Python function that returns True if the string contains at least one alphanumeric character and False otherwise.	def has_alphanumeric(given_string): return any(char.isalnum() for char in given_string)
Write a function that takes a dictionary as input and returns the key with the maximum value.	def max_value_key(given_dict): return max(given_dict, key=given_dict.get)
You are given a list of strings and you need to write a Python function that returns the string with the most occurrences in the list.	def most_frequent_string(given_list): from collections import Counter count = Counter(given_list) return count.most_common(1)[0][0]
Write a function that takes a list of integers as input and returns the sum of all even numbers in the list.	def sum_even_numbers(given_list): return sum(num for num in given_list if num % 2 == 0)
Write a function that takes a list of integers as input and returns True if the list contains at least one even number, and False otherwise.	def contains_even(lst): for num in lst: if num % 2 == 0: return True return False
Write a function that takes a string as input and returns the string with all punctuation removed.	import string def remove_punctuation(s): translator = str.maketrans('', '', string.punctuation) return s.translate(translator)
Write a function that takes a list of strings as input and returns the longest string in the list.	def longest_string(lst): return max(lst, key=len)
Write a function that takes a list of integers as input and returns the sum of all the numbers in the list.	def sum_numbers(lst): return sum(lst)
Write a function that takes a string as input and returns the string with all characters in uppercase.	def uppercase(s): return s.upper()
Write a Python function that takes a list of strings as an input and returns the longest string in the list, ignoring case sensitivity.	def longest_string_case_insensitive(lst): return max(lst, key=lambda s: len(s.casefold()))
Implement a Python class named 'Circle' with an attribute radius. The class should have an area method that returns the area of the circle and a circumference method that returns the circumference of the circle.	import math class Circle: def __init__(self, radius): self.radius = radius def area(self): return math.pi * (self.radius ** 2) def circumference(self): return 2 * math.pi * self.radius
Create a Python function that takes a list of integers as an input and returns a dictionary with the frequency of each number in the list.	def count_frequency(lst): freq = {} for num in lst: if num in freq: freq[num] += 1 else: freq[num] = 1 return freq
Write a Python function that takes a string as an input and returns the string with all characters in uppercase, except for the first character which should be in lowercase.	def custom_case(s): return s[0].lower() + s[1:].upper()
Implement a Python function that takes two lists of integers as an input and returns a new list containing the intersection of the two lists, i.e., the numbers that are common in both lists.	def intersection(lst1, lst2): return [num for num in lst1 if num in lst2]
Write a Python function to find the maximum difference between two elements in a list of integers.	def max_diff(lst): return max(lst) - min(lst)
Write a Python function to count the frequency of each word in a given string, ignoring case and punctuation.	import re from collections import Counter def word_frequencies(s): words = re.findall(r'\b\w+\b', s.lower()) return Counter(words)
Write a Python function to check if a given string contains any duplicates, ignoring case and considering only alphanumeric characters.	import re def has_duplicates(s): s = re.sub(r'\W+', '', s).lower() return len(s) != len(set(s))
Write a Python class called "Circle" with attributes "radius" and methods "area" and "circumference".	import math class Circle: def __init__(self, radius): self.radius = radius def area(self): return math.pi * self.radius ** 2 def circumference(self): return 2 * math.pi * self.radius
Write a Python function to find the first duplicate in a list of integers.	def first_duplicate(lst): seen = set() for num in lst: if num in seen: return num seen.add(num) return None
Create a function called count_even_numbers that takes a list of integers as input and returns the count of even numbers in the list.	``` def count_even_numbers(lst): count = 0 for num in lst: if num % 2 == 0: count += 1 return count ```
Write a function called get_prime_numbers that takes a list of integers as input and returns a new list containing only the prime numbers from the input list.	``` def get_prime_numbers(lst): def is_prime(n): if n < 2: return False for i in range(2, int(n**0.5) + 1): if n % i == 0: return False return True return [num for num in lst if is_prime(num)] ```
Create a function called remove_duplicates that takes a list of strings as input and returns a new list containing only the unique strings from the input list.	``` def remove_duplicates(lst): return list(set(lst)) ```
Write a function called calculate_average that takes a list of numbers as input and returns the average of the numbers in the list.	``` def calculate_average(lst): return sum(lst) / len(lst) ```
Design a function that accepts a list of integers as input and returns a new list where each integer is replaced by its square.	``` def square_numbers(lst): return [num ** 2 for num in lst] ```
Create a Python function that accepts two lists of integers and returns True if they contain the same elements, regardless of order.	def same_elements(lst1, lst2): return sorted(lst1) == sorted(lst2)
Create a Python function to convert a given string from lowercase to uppercase.	def to_uppercase(s): return s.upper()
Write a function that takes a list of integers and returns the sum of all the even numbers in the list.	def sum_even_numbers(lst): return sum(i for i in lst if i % 2 == 0)
Create a function that takes a string as input and returns True if the string starts with an uppercase letter, False otherwise.	def starts_with_uppercase(s): return s and s[0].isupper()
Write a function that takes a list of strings and returns a new list with all strings converted to lowercase.	def to_lowercase(lst): return [s.lower() for s in lst]
Write a function that takes a string as input and returns True if the string contains any vowel (a, e, i, o, u), and False otherwise.	def has_vowel(s): vowels = 'aeiou' for char in s: if char.lower() in vowels: return True return False
Create a function that takes a list of strings as input and returns a new list where all strings have been converted to uppercase.	def strings_to_uppercase(lst): return [s.upper() for s in lst]
Write a function that takes two lists of integers as input and returns a list containing every pair of corresponding elements from the input lists.	def zip_lists(list1, list2): return list(zip(list1, list2))
Write a function that takes an integer as input and returns True if the number is even, and False otherwise.	def is_even(n): return n % 2 == 0
Write a function that takes a list of integers as input and returns a new list containing the squares of all numbers in the input list.	def squares(lst): return [n ** 2 for n in lst]
Write a function that takes a list of integers as input and returns a new list with the elements in reverse order.	def reverse_list(input_list): return input_list[::-1]
Create a function that takes a string as input and returns the string with all occurrences of a specified substring removed.	def remove_substring(input_string, sub_string): return input_string.replace(sub_string, '')
Design a Python function that takes a list of numbers as input and returns the average of all the numbers in the list.	def calculate_average(numbers_list): return sum(numbers_list) / len(numbers_list)
Write a function that accepts a string as input and returns the string with all the characters shifted by a specified number of positions.	def shift_string(input_string, shift_amount): result = "" for char in input_string: if char.isalpha(): ascii_offset = 65 if char.isupper() else 97 result += chr((ord(char) - ascii_offset + shift_amount) % 26 + ascii_offset) else: result += char return result
Create a function that takes a dictionary as input and returns a new dictionary with the keys and values swapped.	def swap_dict_keys_values(input_dict): return {v: k for k, v in input_dict.items()}
You are given a list of tuples, where each tuple contains a student's name and their grade. Write a Python function to find the average grade of all students.	def average_grade(students): total = 0 for student in students: total += student[1] return total / len(students)
You are given a string that contains a sentence. Write a Python function to find the length of the longest word in the sentence.	def longest_word(sentence): words = sentence.split() longest = max(words, key=len) return len(longest)
Write a Python program that takes a list of integers as input and returns a list of integers that are powers of 2.	def powers_of_two(numbers): result = [] for num in numbers: if (num & (num - 1) == 0) and num != 0: result.append(num) return result
You are given a list of integers. Write a Python function to find the second largest number in the list.	def second_largest(numbers): if len(numbers) < 2: return None max_num = second_max = float('-inf') for num in numbers: if num > max_num: second_max = max_num max_num = num elif num > second_max and num != max_num: second_max = num return second_max
Write a Python program that takes a list of strings as input and returns a list of strings that are palindromes.	def find_palindromes(strings): result = [] for s in strings: if s == s[::-1]: result.append(s) return result
Write a function to find the maximum of three given numbers.	def find_max(a, b, c): if a >= b and a >= c: return a elif b >= a and b >= c: return b else: return c
Write a function to calculate the area of a rectangle given its length and width.	def calculate_area(length, width): return length * width
Write a function that takes a list of integers as input and returns the count of all even numbers in the list.	def count_even_numbers(lst): count = 0 for num in lst: if num % 2 == 0: count += 1 return count
Write a function that takes a string as input and returns the count of all vowels in the string.	def count_vowels(s): vowels = 'aeiou' count = 0 for char in s.lower(): if char in vowels: count += 1 return count
Write a function that takes a list of strings as input and returns the string with the maximum length.	def find_longest_string(lst): return max(lst, key=len)
Write a Python function that returns all the prime numbers up to a given integer n.	def get_prime_numbers(n): prime_numbers = [] for possible_prime in range(2, n + 1): is_prime = True for num in range(2, int(possible_prime ** 0.5) + 1): if possible_prime % num == 0: is_prime = False break if is_prime: prime_numbers.append(possible_prime) return prime_numbers
Write a function to calculate the sum of all the digits in a given integer.	def sum_of_digits(n): return sum(int(digit) for digit in str(n))
Implement a Python function that takes a string as input and returns the number of words it contains.	def count_words(s): return len(s.split())
Define a function to find the maximum value in a given list of integers.	def find_max_value(lst): return max(lst)
Write a Python function to find all the permutations of a given string.	import itertools def get_permutations(s): return [''.join(p) for p in itertools.permutations(s)]
Write a function that takes a list of strings as input and returns a new list containing only the strings that are longer than three characters.	def filter_strings(lst): return [s for s in lst if len(s) > 3]
Create a Python function that takes two integers as input and returns True if they are both even, False otherwise.	def check_even(a, b): return a % 2 == 0 and b % 2 == 0
Write a function that takes a list of numbers as input and returns the count of odd numbers in the list.	def count_odd_numbers(lst): return sum(1 for num in lst if num % 2 != 0)
Create a Python function that takes a list of integers as input and returns the sum of all the prime numbers in the list.	def sum_prime_numbers(lst): def is_prime(n): if n <= 1: return False for i in range(2, int(n**0.5) + 1): if n % i == 0: return False return True return sum(num for num in lst if is_prime(num))
Write a function that takes a list of numbers as input and returns the second largest number in the list.	def second_largest(lst): if len(lst) < 2: return None largest = second_largest = float('-inf') for num in lst: if num > largest: second_largest, largest = largest, num elif num > second_largest and num != largest: second_largest = num return second_largest
Write a Python function to find the average of numbers in a list, ignoring all non-numeric values.	def num_average(lst): nums = [x for x in lst if type(x) == int or type(x) == float] if nums: return sum(nums) / len(nums) else: return None
Create a function that checks if a given string is a palindrome (i.e., reads the same backward as forward), ignoring spaces and capitalization.	def palindrome_check(s): s = ''.join(e for e in s if e.isalnum()).lower() return s == s[::-1]
You are given a list of tuples, where each tuple contains two elements: a string and a number. Write a Python function to find the tuple with the maximum number.	def max_tuple(lst): return max(lst, key=lambda x:x[1])
Write a Python function that takes a list of strings as input and returns a new list that contains only the strings with a length of 5 or more.	def filter_strings(lst): return [s for s in lst if len(s) >= 5]
You are given a dictionary where the keys are strings and the values are numbers. Write a Python function to find the key with the maximum value.	def max_key_value(d): return max(d, key=d.get)
Write a Python function that takes a string as input and returns True if the string contains at least one uppercase letter, False otherwise.	def contains_uppercase(s): for char in s: if char.isupper(): return True return False
Write a Python function that takes a list of strings as input and returns the shortest string in the list.	def shortest_string(lst): return min(lst, key=len)
Write a Python function that takes a list of strings as input and returns a new list with all strings in uppercase.	def strings_to_uppercase(lst): return [s.upper() for s in lst]
Write a Python function that takes a list of integers as input and returns a new list with all odd numbers removed.	def remove_odd(lst): return [num for num in lst if num % 2 == 0]
Write a Python function that takes a string as input and returns the number of vowels in the string.	def count_vowels(s): vowels = 'aeiou' count = 0 for char in s: if char.lower() in vowels: count += 1 return count
Write a function to find the frequency of each word in a given sentence.	def word_frequency(sentence): words = sentence.split() frequency = {} for word in words: if word in frequency: frequency[word] += 1 else: frequency[word] = 1 return frequency
Write a Python function that takes a list of integers as input and returns the count of prime numbers in the list.	def count_primes(numbers): def is_prime(n): if n < 2: return False for i in range(2, int(n**0.5) + 1): if n % i == 0: return False return True count = 0 for num in numbers: if is_prime(num): count += 1 return count
Write a function that takes a list of tuples as input, where each tuple contains a name and an age, and returns a dictionary where the keys are the names and the values are the ages.	def name_age_dict(people): result = {} for person in people: result[person[0]] = person[1] return result
Write a Python function that takes a list of lists as input and returns a new list that contains the elements of the inner lists in reverse order.	def reverse_inner_lists(lists): return [inner_list[::-1] for inner_list in lists]
Write a function called most_frequent_characters that takes a string as input and returns a dictionary where the keys are the characters and the values are their frequencies in the string.	def most_frequent_characters(s): frequency = {} for char in s: if char in frequency: frequency[char] += 1 else: frequency[char] = 1 return frequency
Write a Python function that takes a list of strings as input and returns a new list that contains the strings in uppercase.	def uppercase_strings(lst): return [s.upper() for s in lst]
Write a Python function that takes a list of integers as input and returns a new list that contains the integers sorted in descending order.	def sort_descending(lst): return sorted(lst, reverse=True)
Write a Python function that takes a list of strings as input and returns the longest string in the list.	def longest_string(lst): return max(lst, key=len)
Write a Python function that takes a list of integers as input and returns the sum of the cubes of all numbers in the list.	def sum_of_cubes(lst): return sum([n ** 3 for n in lst])
Write a Python function that takes a string as input and returns the string with all consonants removed.	def remove_consonants(s): vowels = 'aeiou' return ''.join([c for c in s.lower() if c in vowels or c.isspace()])
Write a function find_longest_word that takes a list of strings as input and returns the longest word in the list.	def find_longest_word(word_list): return max(word_list, key=len)
Write a Python program that asks the user for a list of numbers and returns the count of the number of positive and negative numbers in the list.	def count_positive_negative_numbers(): num_list = list(map(int, input("Enter a list of numbers separated by space: ").split())) positive_count = sum(1 for num in num_list if num > 0) negative_count = sum(1 for num in num_list if num < 0) return positive_count, negative_count
Write a function that takes a list of strings as input and returns a list of strings where each string is in lowercase.	def convert_to_lower_case(string_list): return [string.lower() for string in string_list]
Write a Python program that accepts a string input from the user and prints out all the possible permutations of the characters in the string.	import itertools def print_permutations(): string_input = input("Enter a string: ") permutations = itertools.permutations(string_input) for permutation in permutations: print(''.join(permutation))
Write a function that takes a dictionary as input and returns a new dictionary where the keys and values are swapped.	def swap_key_value(dictionary): return {value: key for key, value in dictionary.items()}
Write a Python function that takes a string as an input and returns the number of words in the string.	def count_words(s): words = s.split() return len(words)
Write a function that takes two lists of integers as inputs and returns a new list that contains the intersection of the two input lists.	def find_intersection(lst1, lst2): return list(set(lst1) & set(lst2))
Write a Python function that takes a list of strings as an input and returns the longest string in the list.	def find_longest_str(lst): return max(lst, key=len)
Write a function that takes a list of integers as an input and returns the list in descending order.	def sort_descending(lst): return sorted(lst, reverse=True)
Write a Python function that takes a list of tuples as an input and returns a new list that contains only the first element of each tuple.	def extract_first_elements(lst): return [tup[0] for tup in lst]
Write a function that takes a string as an input and returns the number of vowels in the string.	def count_vowels(s): vowels = 'aeiouAEIOU' count = 0 for char in s: if char in vowels: count += 1 return count
You are given a list of integers. Write a function to find the closest pair of identical elements in the list.	def find_closest_pair(lst): min_diff = float('inf') pair = () for i in range(len(lst)): for j in range(i + 1, len(lst)): if lst[i] == lst[j]: diff = j - i if diff < min_diff: min_diff = diff pair = (i, j) return pair
Write a function that takes a list of strings as input and returns the string that appears most frequently.	def most_frequent(lst): freq_dict = {} for s in lst: if s in freq_dict: freq_dict[s] += 1 else: freq_dict[s] = 1 max_freq = max(freq_dict.values()) most_freq_str = [s for s, freq in freq_dict.items() if freq == max_freq] return most_freq_str[0]
You are given a 2D list of integers. Write a function to find the row with the maximum sum.	def max_sum_row(lst): max_sum = float('-inf') max_sum_row = [] for row in lst: row_sum = sum(row) if row_sum > max_sum: max_sum = row_sum max_sum_row = row return max_sum_row
Write a function that takes a string as an input and returns the string with all vowels removed.	def remove_vowels(s): vowels = 'aeiouAEIOU' new_s = '' for char in s: if char not in vowels: new_s += char return new_s
Given a list of strings, write a function to find the longest string in the list.	def find_longest_string(lst): return max(lst, key=len)
Write a function to check if a given number is a palindrome or not.	def is_palindrome(num): return str(num) == str(num)[::-1]
Create a Python function to find the average of a list of numbers.	def find_average(lst): return sum(lst) / len(lst)
Write a function to reverse the order of words in a given sentence.	def reverse_sentence(sentence): words = sentence.split() reversed_words = words[::-1] return ' '.join(reversed_words)
Given a list of integers, write a function to find the count of prime numbers in the list.	def count_primes(lst): def is_prime(n): if n <= 1: return False if n <= 3: return True if n % 2 == 0 or n % 3 == 0: return False i = 5 while i * i <= n: if n % i == 0 or n % (i + 2) == 0: return False i += 6 return True count = 0 for num in lst: if is_prime(num): count += 1 return count
Write a Python function `count_elements` to count the frequency of each element in a list.	``` def count_elements(lst): frequency = {} for elem in lst: if elem in frequency: frequency[elem] += 1 else: frequency[elem] = 1 return frequency ```
Define a function `contains_substring` that takes two strings as input and returns True if the second string is a substring of the first, and False otherwise.	``` def contains_substring(main_str, sub_str): if sub_str in main_str: return True return False ```
Write a Python function `sort_descending` that takes a list of numbers as input and returns the list in descending order.	``` def sort_descending(lst): return sorted(lst, reverse=True) ```
Write a function `get_longest_word` that takes a string of words as input and returns the longest word in the string.	``` def get_longest_word(sentence): words = sentence.split() longest_word = max(words, key=len) return longest_word ```
Define a function `check_anagram` that takes two strings as input and returns True if the strings are anagrams of each other, and False otherwise.	``` def check_anagram(str1, str2): if sorted(str1) == sorted(str2): return True return False ```
Implement a function to find the square root of a given number.	def find_square_root(n): if n < 0: return "Error: Square root of negative number is not a real number." else: return n ** 0.5
Write a function that takes in a list of integers and returns the list in descending order.	def sort_descending(lst): lst.sort(reverse=True) return lst
Create a program that asks the user for their height in inches and weight in pounds, and then prints out their BMI.	def calculate_bmi(): height = float(input("Enter your height in inches: ")) weight = float(input("Enter your weight in pounds: ")) bmi = weight / (height ** 2) * 703 print("Your BMI is:", round(bmi, 2))
Implement a function to convert a given binary number to decimal.	def binary_to_decimal(binary): decimal = int(binary, 2) return decimal
Write a function that takes in a string and returns true if it starts with a vowel, false otherwise.	def starts_with_vowel(s): vowels = "aeiouAEIOU" if s[0] in vowels: return True else: return False
Write a function that takes a list of strings as input and returns a new list containing the strings in uppercase.	def upper_case_strings(lst): return [item.upper() for item in lst]
Implement a class called `Rectangle` with attributes `length` and `width`, and methods `area` and `perimeter`.	class Rectangle: def __init__(self, length, width): self.length = length self.width = width def area(self): return self.length * self.width def perimeter(self): return 2 * (self.length + self.width)
You are given a list of integers and you need to write a Python function that returns the number of even numbers in the list.	def count_even_numbers(lst): count = 0 for num in lst: if num % 2 == 0: count += 1 return count
Create a Python function that takes a string as input and returns the string with all vowels removed.	def remove_vowels(s): vowels = 'aeiouAEIOU' return ''.join([char for char in s if char not in vowels])
Implement a class called `ComplexNumber` with attributes `real` and `imaginary`, and methods `add` and `subtract` for adding and subtracting two complex numbers.	class ComplexNumber: def __init__(self, real, imaginary): self.real = real self.imaginary = imaginary def add(self, other): real_part = self.real + other.real imaginary_part = self.imaginary + other.imaginary return ComplexNumber(real_part, imaginary_part) def subtract(self, other): real_part = self.real - other.real imaginary_part = self.imaginary - other.imaginary return ComplexNumber(real_part…
Write a Python function that takes a list of strings and returns the string with the maximum length.	def longest_string(lst): return max(lst, key=len)
Create a Python function that takes a dictionary as input and returns a new dictionary with only the items that have values greater than a certain threshold.	def filter_dict(d, threshold): return {k: v for k, v in d.items() if v > threshold}
Write a Python function that takes a list of integers as input and returns the count of integers that are greater than the average of the list.	def count_above_average(lst): avg = sum(lst) / len(lst) return sum(1 for num in lst if num > avg)
Write a Python function that takes a list of strings as input and returns the count of strings that start with a vowel.	def count_strings_starting_with_vowel(lst): vowels = 'aeiouAEIOU' return sum(1 for s in lst if s and s[0] in vowels)
Write a Python function that takes a list of numbers as input and returns the median of the list.	def find_median(lst): sorted_lst = sorted(lst) n = len(lst) if n % 2 == 0: return (sorted_lst[n//2 - 1] + sorted_lst[n//2]) / 2 else: return sorted_lst[n//2]
Write a Python function that takes a string as an input and returns True if the string contains at least one uppercase letter, False otherwise.	def has_uppercase(s): for char in s: if char.isupper(): return True return False
Write a Python function that takes a list of strings as an input and returns a list of strings with all vowels removed.	def remove_vowels(lst): vowels = 'aeiouAEIOU' return [''.join(char for char in s if char not in vowels) for s in lst]
Write a Python function that takes a number as an input and returns True if the number is a perfect square, False otherwise.	import math def is_perfect_square(n): if n < 0: return False sqrt = math.sqrt(n) return sqrt == int(sqrt)
Write a Python function that takes a list of integers as an input and returns the second largest number in the list.	def second_largest(lst): if len(lst) < 2: return None largest = second_largest = float('-inf') for num in lst: if num > largest: largest, second_largest = num, largest elif num < largest and num > second_largest: second_largest = num return second_largest
Write a Python function that takes a string as an input and returns True if the string is a palindrome, False otherwise.	def is_palindrome(s): s = s.replace(' ', '').lower() return s == s[::-1]
Write a Python function that takes a list of numbers as input and returns a new list with all numbers multiplied by 2.	def multiply_by_two(numbers): return [num * 2 for num in numbers]
Write a Python function that takes a string as input and returns the string with all vowels removed.	def remove_vowels(s): vowels = 'aeiouAEIOU' return ''.join([c for c in s if c not in vowels])
Create a Python function that takes a list of strings as input and returns a new list with all strings in uppercase.	def uppercase_strings(strings): return [s.upper() for s in strings]
Write a Python function that takes a list of lists as input and returns a new list with all inner lists flattened.	def flatten_lists(lists): return [item for sublist in lists for item in sublist]
Write a Python function that takes a string as input and returns the string with all characters reversed.	def reverse_string(s): return s[::-1]
Write a function to reverse a given string without using the built-in reverse function or slicing.	``` def reverse_string(s): result = '' for char in s: result = char + result return result ```
Implement a function to find the middle element of a linked list.	``` def fibonacci_numbers(n): fib_list = [0, 1] while fib_list[-1] < n: fib_list.append(fib_list[-1] + fib_list[-2]) return fib_list ```
Write a function that takes a list of integers as input and returns the count of triplets that sum up to zero.	``` class Node: def __init__(self, data): self.data = data self.next = None def find_middle(head): slow = head fast = head while fast is not None and fast.next is not None: slow = slow.next fast = fast.next.next return slow.data ```
Create a function that determines whether a given string is a palindrome or not.	``` def count_zero_triplets(nums): nums.sort() count = 0 for i in range(len(nums) - 2): left, right = i + 1, len(nums) - 1 while left < right: total = nums[i] + nums[left] + nums[right] if total < 0: left += 1 elif total > 0: right -= 1 else: count += 1 left += 1 right -= 1 return count ```
Write a function to count the number of occurrences of each word in a given string.	def word_frequency(string): words = string.split() frequency = {} for word in words: if word in frequency: frequency[word] += 1 else: frequency[word] = 1 return frequency
Write a function that takes a list of integers as input and returns the sum of all the even numbers in the list.	def sum_even_numbers(numbers): sum = 0 for number in numbers: if number % 2 == 0: sum += number return sum
Write a function that takes two strings as input and returns True if the two strings have the same characters in the same order, ignoring case sensitivity.	def strings_match(string1, string2): return string1.casefold() == string2.casefold()
Write a class called "Circle" with attributes "radius" and methods "area" and "circumference".	import math class Circle: def __init__(self, radius): self.radius = radius def area(self): return math.pi * (self.radius ** 2) def circumference(self): return 2 * math.pi * self.radius
Write a function that takes a list of dictionaries as input, where each dictionary represents a book with keys "title" and "author", and returns a dictionary where the keys are the book titles and the values are the corresponding authors.	def books_authors(books): authors = {} for book in books: authors[book["title"]] = book["author"] return authors
Write a function that takes a list of words as input and returns True if all words start with an uppercase letter, and False otherwise.	def all_uppercase(words): for word in words: if not word[0].isupper(): return False return True
Create a Python function that takes a list of integers as input and returns the sum of all numbers at even indices.	def sum_even_indices(numbers): total = 0 for i in range(0, len(numbers), 2): total += numbers[i] return total
Write a function that takes a list of strings as input and returns a new string created by concatenating all strings in the list in reverse order.	def concatenate_reverse(strings): reversed_strings = strings[::-1] return ''.join(reversed_strings)
Design a Python function that takes a list of integers as input and returns the product of all numbers in the list that are less than 5.	def product_less_than_5(numbers): product = 1 for num in numbers: if num < 5: product *= num return product
Create a Python function that takes a list of integers as input and returns a list of tuples, where each tuple contains a number and its square.	def number_square_pairs(numbers): return [(num, num ** 2) for num in numbers]
Write a Python function that takes a string as input and returns the string with all occurrences of a specific character removed.	def remove_char(input_string, char_to_remove): return input_string.replace(char_to_remove, '');
Create a Python program that reads a list of integers from the user, sorts them in ascending order, and then prints the sorted list.	def sort_list(input_list): return sorted(input_list);
Define a function that calculates the average of a list of numbers.	def calculate_average(numbers_list): if len(numbers_list) == 0: return 0; else: return sum(numbers_list) / len(numbers_list);
You are given a list of strings where each string represents a student's name. Write a function to count the number of students sharing the same name and return the count of each name.	import random import string def generate_password(password_length): all_characters = string.ascii_letters + string.digits; return ''.join(random.choice(all_characters) for _ in range(password_length));
Create a Python function that calculates the greatest common divisor of two numbers using the Euclidean algorithm.	def gcd(a, b): while b != 0: a, b = b, a % b return a
Write a Python program to count the number of uppercase and lowercase letters in a given string.	def count_case(s): uppercase = 0 lowercase = 0 for char in s: if char.isupper(): uppercase += 1 elif char.islower(): lowercase += 1 return uppercase, lowercase
Write a Python function that takes a list of strings as input and returns a new list with all strings sorted in descending order.	def sort_strings(lst): return sorted(lst, reverse=True)
Write a Python function that takes a list of numbers as input and returns the sum of all even numbers in the list.	def sum_even(lst): return sum(num for num in lst if num % 2 == 0)
Write a Python function that takes a dictionary as input and returns a new dictionary with all keys converted to uppercase.	def uppercase_keys(d): return {k.upper(): v for k, v in d.items()}
Write a Python function that takes a list of strings as input and returns a list of strings where all vowels have been removed from each string.	def remove_vowels(lst): vowels = 'aeiouAEIOU' result = [] for string in lst: new_str = ''.join(char for char in string if char not in vowels) result.append(new_str) return result
Create a function that takes a list of integers as input and returns the count of all prime numbers in the list.	def count_primes(lst): def is_prime(n): if n < 2: return False for i in range(2, int(n**0.5) + 1): if n % i == 0: return False return True count = 0 for num in lst: if is_prime(num): count += 1 return count
You are given a string and you need to write a Python function that splits the string into all possible substrings and returns them in a list.	def all_substrings(s): substrings = [] for i in range(len(s)): for j in range(i + 1, len(s) + 1): substrings.append(s[i:j]) return substrings
Write a Python function that takes a list of integers as input and returns a dictionary where the keys are the integers and the values are their squares.	def square_dict(lst): return {num: num**2 for num in lst}
Implement a function that takes a list of strings and returns a new list containing only the strings that contain exactly two words.	def two_word_strings(lst): return [s for s in lst if len(s.split()) == 2]
Create a Python program that accepts a list input from the user and returns the list with all duplicates removed.	def remove_duplicates(input_list): return list(set(input_list))
Write a Python function that calculates the sum of the first n Fibonacci numbers.	def fibonacci_sum(n): if n <= 0: return 0 elif n == 1: return 0 elif n == 2: return 1 else: a, b = 0, 1 total = 1 for _ in range(2, n): a, b = b, a + b total += b return total
Design a function that accepts a string as input and returns the string in reverse order, but with the vowels in their original positions.	def reverse_with_vowels(s): vowels = 'aeiouAEIOU' s = list(s) left, right = 0, len(s) - 1 while left < right: if s[left] not in vowels and s[right] not in vowels: s[left], s[right] = s[right], s[left] left += 1 right -= 1 elif s[left] in vowels: left += 1 elif s[right] in vowels: right -= 1 return ''.join(s)
Implement a function that takes a string input and returns the count of each character in the string.	def char_count(s): count_dict = {} for char in s: if char in count_dict: count_dict[char] += 1 else: count_dict[char] = 1 return count_dict
Write a Python program to find the maximum value in a list of lists.	def max_in_lists(lists): max_val = float('-inf') for sublist in lists: max_val = max(max_val, max(sublist)) return max_val
You are given a list of integers representing the marks of students in a class. Write a function `calculate_average_marks` that takes this list as an input and returns the average marks of the class.	def calculate_average_marks(marks): total_marks = sum(marks) average_marks = total_marks / len(marks) return average_marks
Create a function that takes a string as an input and returns the string in uppercase.	def convert_to_uppercase(s): return s.upper()
Write a function that takes a list of dictionaries where each dictionary represents a book with keys 'title', 'author', and 'price'. The function should return the title of the book with the highest price.	def find_most_expensive_book(books): most_expensive_book = max(books, key=lambda x:x['price']) return most_expensive_book['title']
Create a program that asks the user for their favorite color and then prints out a message saying "I like <color> too!".	def favorite_color(): color = input("What is your favorite color? ") print(f"I like {color} too!") favorite_color()
Write a function that takes a list of lists where each sublist represents a matrix row. The function should return the sum of all elements in the matrix.	def sum_matrix_elements(matrix): return sum(sum(row) for row in matrix)
Write a Python program that counts the frequency of each character in a given string.	def char_frequency_counter(s): frequency = {} for char in s: if char in frequency: frequency[char] += 1 else: frequency[char] = 1 return frequency
Develop a Python function that takes a list of integers as input and returns the second largest number in the list.	def second_largest(nums): largest = max(nums) nums.remove(largest) return max(nums) if nums else None
Write a Python function that takes a list of strings as input and returns the string that appears most frequently.	from collections import Counter def most_frequent_string(strings): count = Counter(strings) return count.most_common(1)[0][0]
Write a Python function that takes a list of integers as input and returns True if the list is in ascending order, and False otherwise.	def is_ascending_order(nums): return all(nums[i] <= nums[i+1] for i in range(len(nums)-1))
Develop a Python function that takes a list of integers as input and returns the number of even numbers in the list.	def count_even_numbers(nums): return sum(1 for num in nums if num % 2 == 0)
Write a Python function to count the occurrences of each character in a given string. For example, if the input string is 'hello world', the function should return a dictionary with the character counts, such as {'h': 1, 'e': 1, 'l': 3, 'o': 2, ' ': 1, 'w': 1, 'r': 1, 'd': 1}.	def char_count(string): char_dict = {} for char in string: if char in char_dict: char_dict[char] += 1 else: char_dict[char] = 1 return char_dict
Create a Python function that takes a list of lists as input and returns the total sum of all the numbers in the sublists. For example, if the input list is [[1, 2], [3, 4], [5, 6]], the function should return 21.	def total_sum(list_of_lists): total = 0 for sublist in list_of_lists: for num in sublist: total += num return total
Write a Python function that takes a string parameter, check if the string contains any uppercase letters. If the string contains at least one uppercase letter, the function should return True.	def has_uppercase(string): for char in string: if char.isupper(): return True return False
Create a Python function that takes a list of strings as input and returns a list of strings in uppercase. For example, if the input list is ['hello', 'world', 'python'], the function should return ['HELLO', 'WORLD', 'PYTHON'].	def to_uppercase(list_of_strings): return [string.upper() for string in list_of_strings]
Write a Python function to find the maximum value in a given list of integers. For example, if the input list is [1, 2, 3, 4, 5], the function should return 5.	def max_value(list_of_integers): return max(list_of_integers)
Write a function that takes a list of integers as input and returns True if the list contains only unique elements and False otherwise.	def all_unique(lst): return len(lst) == len(set(lst))
Write a function that takes a list of integers as input and returns the number of elements that are greater than their predecessors.	def count_greater_than_predecessor(lst): count = 0 for i in range(1, len(lst)): if lst[i] > lst[i-1]: count += 1 return count
Write a function that takes a list of strings as input and returns a dictionary where the keys are the strings and the values are the number of occurrences of each string.	def count_string_occurrences(lst): count_dict = {} for string in lst: if string in count_dict: count_dict[string] += 1 else: count_dict[string] = 1 return count_dict
Write a function that takes a string as input and returns the string with all alphabetic characters converted to uppercase.	def convert_to_uppercase(s): return s.upper()
Write a function that takes a list of lists as input and returns a new list that is the concatenation of all the sublists.	def concatenate_lists(lst): return [item for sublist in lst for item in sublist]
Write a function that removes the duplicates from a list while preserving the original order.	``` def remove_duplicates(lst): seen = set() result = [] for item in lst: if item not in seen: result.append(item) seen.add(item) return result ```
Write a function that swaps the first and last elements of a list.	``` def swap_first_last(lst): if len(lst) > 1: lst[0], lst[-1] = lst[-1], lst[0] return lst ```
Write a function that takes a list of strings as input and returns the string with the maximum length.	``` def max_length_string(lst): return max(lst, key=len) ```
Write a function that takes a list of integers as input and returns the number of occurrences of the maximum value.	``` def max_value_occurrences(lst): max_val = max(lst) return lst.count(max_val) ```
Write a function that takes a list of strings as input and returns a list of strings with all vowels removed.	``` def remove_vowels(lst): vowels = 'aeiouAEIOU' return [''.join([char for char in string if char not in vowels]) for string in lst] ```
Write a Python function to find the count of vowels in a given string, ignoring the case sensitivity.	def count_vowels(s): vowels = 'aeiouAEIOU' count = 0 for char in s: if char in vowels: count += 1 return count
Create a Python function that takes a list of integers as input and returns a new list containing the squares of all the numbers in the input list.	def square_numbers(lst): return [n ** 2 for n in lst]
Write a Python function to calculate the sum of the digits of a given positive integer.	def sum_of_digits(n): return sum(int(digit) for digit in str(n))
Create a Python function that takes a string as input and returns True if the string contains at least one digit, False otherwise.	def contains_digit(s): return any(char.isdigit() for char in s)
Write a Python function to find the maximum absolute difference between any two elements in a given list of integers.	def max_absolute_diff(lst): return max(abs(x - y) for x in lst for y in lst)
Write a function that takes a list of integers as input and returns the number of even numbers in the list.	def count_even_numbers(numbers): count = 0 for number in numbers: if number % 2 == 0: count += 1 return count
Write a function that takes a dictionary as input and returns a list of keys in the dictionary.	def get_keys(d): return list(d.keys())
Write a function that takes a string as input and returns the string with all vowels removed.	def remove_vowels(s): vowels = 'aeiouAEIOU' return ''.join([c for c in s if c not in vowels])
Write a function that takes a list of dictionaries as input and returns a list of values of a specific key in each dictionary.	def get_values(dict_list, key): return [d.get(key) for d in dict_list]
Write a function that takes a list of strings as input and returns a list of strings in uppercase.	def uppercase_strings(strings): return [s.upper() for s in strings]
Implement a function that takes a string as input and returns the frequency of each character in the string.	def char_frequency(s): frequency = {} for char in s: if char in frequency: frequency[char] += 1 else: frequency[char] = 1 return frequency
Write a function that takes a list of integers as input and returns a new list with all duplicate elements removed, preserving the original order.	def remove_duplicates(lst): new_lst = [] for elem in lst: if elem not in new_lst: new_lst.append(elem) return new_lst
You are given a list of integers and you need to write a Python function that returns the count of prime numbers in the list.	def count_primes(lst): def is_prime(n): if n <= 1: return False if n == 2: return True if n % 2 == 0: return False i = 3 while i * i <= n: if n % i == 0: return False i += 2 return True count = 0 for num in lst: if is_prime(num): count += 1 return count
Write a function that takes a list of strings as input and returns a new list with all strings in uppercase.	def uppercase_strings(lst): return [s.upper() for s in lst]
Implement a function that takes a list of integers as input and returns the index of the first occurrence of the smallest number in the list.	def index_of_smallest(lst): return lst.index(min(lst))
Write a function that takes a list of integers as input and returns the integer that appears most frequently.	def most_frequent_integer(lst): frequency_dict = {} for num in lst: frequency_dict[num] = frequency_dict.get(num, 0) + 1 most_frequent = max(frequency_dict, key=frequency_dict.get) return most_frequent
Create a program that takes a list of strings as input and returns a new list with all strings in uppercase.	def strings_to_uppercase(lst): uppercase_list = [string.upper() for string in lst] return uppercase_list
Write a function that takes a list of integers as input and returns the count of integers that are greater than their previous integer.	def count_greater_than_previous(lst): count = 0 for i in range(1, len(lst)): if lst[i] > lst[i-1]: count += 1 return count
Write a function that takes a list of integers as input and returns the sum of all integers that are multiples of 3 or 5.	def sum_multiples(lst): sum_multiples = sum(num for num in lst if num % 3 == 0 or num % 5 == 0) return sum_multiples
Create a program that takes a list of dictionary objects as input, where each dictionary represents a student with keys 'name' and 'age', and returns a list of students' names in alphabetical order.	def sort_students_by_name(lst): sorted_names = [student['name'] for student in sorted(lst, key=lambda x: x['name'])] return sorted_names
Write a function that accepts a list of strings and returns a new list with all strings converted to uppercase.	def convert_to_uppercase(strings): return [string.upper() for string in strings]
Write a function that takes a list of integers as input and returns the sum of all even numbers in the list.	def sum_even_numbers(numbers): return sum(number for number in numbers if number % 2 == 0)
Write a function that accepts a string as input and returns the string with all occurrences of a specific character removed.	def remove_character(string, char): return string.replace(char, '')
Write a function that takes a list of strings as input and returns a dictionary where the keys are the strings and the values are the lengths of the strings.	def string_lengths(strings): return {string: len(string) for string in strings}
Write a function that takes two strings as input and returns True if the strings are anagrams of each other, False otherwise.	def are_anagrams(str1, str2): return sorted(str1) == sorted(str2)
Given a two-dimensional list `matrix` of integers, return the sum of the elements in the main diagonal.	def diagonal_sum(matrix): sum_of_diagonal = 0 for i in range(len(matrix)): sum_of_diagonal += matrix[i][i] return sum_of_diagonal
Write a function to find the first duplicate in a list of integers.	def find_first_duplicate(nums): num_count = {} for num in nums: if num in num_count: return num num_count[num] = 1 return None
Develop a Python function to count the number of words in a given string.	def count_words(s): words = s.split() return len(words)
Write a function that takes a string `s` as input and returns the string with all vowels removed.	def remove_vowels(s): vowels = 'aeiouAEIOU' return ''.join([char for char in s if char not in vowels])
Write a function to find the maximum product of two distinct numbers in a list.	def max_product(nums): max1 = max2 = float('-inf') for num in nums: if num > max1: max2 = max1 max1 = num elif num > max2: max2 = num return max1 * max2
Write a function that takes a list of strings as an input and returns the string that appears most frequently in the list.	def most_frequent_string(lst): frequency_dict = {} for string in lst: if string in frequency_dict: frequency_dict[string] += 1 else: frequency_dict[string] = 1 max_frequency = max(frequency_dict.values()) most_frequent_strings = [string for string, frequency in frequency_dict.items() if frequency == max_frequency] return most_frequent_strings[0]
Write a Python function that takes a dictionary as an argument and returns a new dictionary with the keys and values swapped.	def swap_dict_keys_values(dict_obj): swapped_dict = {} for key, value in dict_obj.items(): if value not in swapped_dict: swapped_dict[value] = key else: if isinstance(swapped_dict[value], list): swapped_dict[value].append(key) else: swapped_dict[value] = [swapped_dict[value], key] return swapped_dict
Write a function that takes a list of integers as an input and returns the number of prime numbers in the list.	def count_primes(lst): def is_prime(n): if n < 2: return False for i in range(2, int(n ** 0.5) + 1): if n % i == 0: return False return True count = 0 for num in lst: if is_prime(num): count += 1 return count
Write a Python function that takes a string as an input and returns the number of vowels in the string.	def count_vowels(string): vowels = 'aeiou' count = 0 for char in string.lower(): if char in vowels: count += 1 return count
Write a function that takes a list of integers as an input and returns the sum of all the even numbers in the list.	def sum_even_numbers(lst): return sum(num for num in lst if num % 2 == 0)
Write a function that takes a list of strings as input and returns the list of strings with all leading and trailing whitespaces removed.	def remove_whitespaces(lst): return [s.strip() for s in lst]
Write a function that takes a list of integers as input and returns a list of tuples, where each tuple contains a number and its square.	def squares(lst): return [(n, n**2) for n in lst]
Write a function that takes a string as input and returns the count of all alphanumeric characters in the string.	def alphanumeric_count(s): return sum(c.isalnum() for c in s)
Write a function that takes a dictionary as input and returns a new dictionary with all keys and values swapped.	def swap_dict(d): return {v: k for k, v in d.items()}
Write a function that takes a list of integers as input and returns True if the list contains at least one duplicate, and False otherwise.	def has_duplicates(lst): return len(lst) != len(set(lst))
Write a Python function to calculate the factorial of a given integer without using the math library or recursion.	def factorial(n): if n == 0: return 1 else: result = 1 for i in range(1, n + 1): result *= i return result
Write a Python function that takes a list of strings as input and returns a new list with all strings converted to uppercase.	def uppercase_strings(lst): return [s.upper() for s in lst]
Implement a function that takes a list of integers and returns True if the list contains at least one pair of identical elements, and False otherwise.	def has_duplicates(lst): return len(lst) != len(set(lst))
Write a Python function that takes a string as input and returns the string with all vowels removed.	def remove_vowels(s): vowels = 'aeiouAEIOU' return ''.join([c for c in s if c not in vowels])
Implement a function that takes a list of integers as input and returns a new list with the elements in reverse order.	def reverse_list(lst): return lst[::-1]
Write a Python function that takes a list of integers as input and returns the count of even numbers in the list.	def count_even_numbers(lst): count = 0 for num in lst: if num % 2 == 0: count += 1 return count
Create a Python function that accepts a string as input and returns the string in uppercase, but only if the length of the string is greater than 5.	def uppercase_string(s): if len(s) > 5: return s.upper() else: return s
Write a Python function to find the second smallest number in a list of integers.	def second_smallest(lst): if len(lst) < 2: return None lst = list(set(lst)) # remove duplicates lst.sort() return lst[1]
Create a Python program that takes a list of strings as input and returns the longest string.	def longest_string(lst): if not lst: return None return max(lst, key=len)
Write a Python function that calculates the average of all the elements in a list of integers.	def average_of_list(lst): if not lst: return None return sum(lst) / len(lst)
Create a function that takes a list of integers and returns the count of numbers that are greater than the average of the list.	def count_numbers_greater_than_average(lst): average = sum(lst) / len(lst) count = 0 for num in lst: if num > average: count += 1 return count
Write a function that takes a list of strings and returns the longest palindromic string.	def longest_palindromic_string(lst): def is_palindrome(s): return s == s[::-1] longest_palindrome = '' for s in lst: if is_palindrome(s) and len(s) > len(longest_palindrome): longest_palindrome = s return longest_palindrome
Create a function that takes two lists of integers and returns a list of integers that are present in both lists.	def common_elements(lst1, lst2): return [num for num in lst1 if num in lst2]
Write a function that takes a string and returns the count of vowels in the string.	def count_vowels(s): vowels = 'aeiou' count = 0 for char in s.lower(): if char in vowels: count += 1 return count
Create a function that takes a list of integers and returns the second largest number in the list.	def second_largest(lst): if len(lst) < 2: return None largest = second_largest = float('-inf') for num in lst: if num > largest: second_largest = largest largest = num elif num > second_largest and num < largest: second_largest = num return second_largest
Write a Python function that takes a list of integers as input and returns a new list with all the integers multiplied by 3.	def multiply_by_three(lst): return [i * 3 for i in lst]
Develop a Python function to remove all the vowels from a given string.	def remove_vowels(s): vowels = 'aeiouAEIOU' return ''.join([c for c in s if c not in vowels])
Write a Python function that takes a list of lists as input and returns a new list with all the sublists sorted in ascending order.	def sort_sublists(lst): return [sorted(sublist) for sublist in lst]
Write a Python function that takes a string as input and returns True if the string is a palindrome, False otherwise.	def is_palindrome(s): return s == s[::-1]
Develop a Python class called "Circle" with attributes "radius" and methods "area" and "circumference".	import math class Circle: def __init__(self, radius): self.radius = radius def area(self): return math.pi * (self.radius ** 2) def circumference(self): return 2 * math.pi * self.radius
Write a function that takes a list of integers as input and returns a new list that contains only the numbers greater than the average of the list.	def filter_above_average(lst): avg = sum(lst) / len(lst) return [x for x in lst if x > avg]
Write a function that takes a list of strings as input and returns the frequency of each string in the list.	def string_frequencies(lst): frequency_dict = {} for string in lst: if string in frequency_dict: frequency_dict[string] += 1 else: frequency_dict[string] = 1 return frequency_dict
Write a function that takes two lists of integers as input and returns their dot product.	def dot_product(lst1, lst2): if len(lst1) != len(lst2): return "Lists must be of the same length" return sum(x*y for x, y in zip(lst1, lst2))
Write a function that takes a list of integers as input and returns a new list with the elements in reverse order, without using the reverse() method or slicing.	def reverse_list(lst): new_list = [] for i in range(len(lst)-1, -1, -1): new_list.append(lst[i]) return new_list
Write a function that takes a list of integers as input and returns the mode of the list, which is the number that appears most frequently.	def find_mode(lst): frequency_dict = {} for num in lst: if num in frequency_dict: frequency_dict[num] += 1 else: frequency_dict[num] = 1 max_frequency = max(frequency_dict.values()) modes = [k for k, v in frequency_dict.items() if v == max_frequency] return modes
Write a Python function to convert a given temperature in Celsius to Fahrenheit.	def celsius_to_fahrenheit(celsius): return (celsius * 9/5) + 32
Write a class called "Rectangle" with two attributes "length" and "width" and a method "area" to calculate the area of the rectangle.	class Rectangle: def __init__(self, length, width): self.length = length self.width = width def area(self): return self.length * self.width
Write a Python function to count the number of vowels in a given string.	def count_vowels(s): vowels = 'aeiou' count = 0 for char in s: if char.lower() in vowels: count += 1 return count
Write a Python function to find the maximum value in a list of numbers.	def find_max(lst): return max(lst)
Write a Python function to reverse a given string.	def reverse_string(s): return s[::-1]
Create a function that takes a list of strings as input and returns a new list containing only the strings that are longer than 4 characters.	def filter_long_strings(string_list): return [s for s in string_list if len(s) > 4]
Write a function that takes a dictionary as input and returns a new dictionary with only the key-value pairs where the keys are strings.	def filter_string_keys(input_dict): return {k: v for k, v in input_dict.items() if isinstance(k, str)}
Create a Python function that accepts a list of integers as input and returns the count of all numbers in the list that are greater than or equal to 10 and less than 20.	def count_numbers_in_range(num_list): return len([n for n in num_list if 10 <= n < 20])
Write a function that takes a string as input and returns the string with all the characters in uppercase except the first character, which should be in lowercase.	def custom_case_conversion(input_string): return input_string[0].lower() + input_string[1:].upper()
Create a Python function that accepts a list of lists as input and returns True if all sublists contain the same elements, False otherwise.	def check_sublists_identity(list_of_lists): return all(sublist == list_of_lists[0] for sublist in list_of_lists)
Write a function that takes a string as input and returns the number of vowels in the string.	def count_vowels(s): vowels = 'aeiouAEIOU' count = 0 for char in s: if char in vowels: count += 1 return count
Write a function that takes a list of integers as input and returns the count of numbers that are greater than the average of the list.	def count_greater_than_average(lst): average = sum(lst) / len(lst) count = 0 for num in lst: if num > average: count += 1 return count
Design a function that takes a list of strings as input and returns a new list containing only the strings that start with an uppercase letter.	def filter_uppercase(strings): new_list = [] for s in strings: if s[0].isupper(): new_list.append(s) return new_list
Write a function that takes a dictionary as input and returns a new dictionary where the keys and values are swapped.	def swap_dict_keys_values(d): new_dict = {} for key, value in d.items(): new_dict[value] = key return new_dict
Write a function that takes a list of integers as input and returns the count of numbers that are perfect squares.	def count_perfect_squares(lst): count = 0 for num in lst: root = num ** 0.5 if int(root + 0.5) ** 2 == num: count += 1 return count
Write a Python function that takes a list of integers as input and returns the count of odd numbers in the list.	def count_odd_numbers(lst): count = 0 for num in lst: if num % 2 != 0: count += 1 return count
Write a function that takes a string as input and returns True if all characters in the string are uppercase, and False otherwise.	def is_uppercase(s): return s.isupper()
Write a class called "Circle" with an attribute "radius" and methods "area" and "circumference".	import math class Circle: def __init__(self, radius): self.radius = radius def area(self): return math.pi * self.radius ** 2 def circumference(self): return 2 * math.pi * self.radius
Write a function that takes a list of strings as input, and returns a new list with all the strings in uppercase.	def uppercase_strings(lst): return [s.upper() for s in lst]
Write a function that takes a list of integers and a target integer as input, and returns the index of the target integer in the list if it exists, and -1 otherwise.	def find_index(lst, target): try: return lst.index(target) except ValueError: return -1
Given a list of strings, write a Python function to return a list of strings in uppercase.	def uppercase_strings(list_of_strings): return [string.upper() for string in list_of_strings]
Write a Python function that takes a dictionary as input, where the keys are strings and the values are lists of integers, and returns a dictionary where the values are the lengths of the lists.	def dictionary_value_lengths(dictionary): return {key: len(value) for key, value in dictionary.items()}
Create a class called Car with attributes for the car's make, model, and year. The class should have methods to set the car's make, model, and year, and a method to display the car's information.	class Car: def __init__(self, make=None, model=None, year=None): self.make = make self.model = model self.year = year def set_make(self, make): self.make = make def set_model(self, model): self.model = model def set_year(self, year): self.year = year def display_car_info(self): return f"Make: {self.make}, Model: {self.model}, Year: {self.year}"
Write a Python function to find the number of occurrences of a specific character in a given string.	def count_character_occurrences(string, character): return string.count(character)
Write a Python function that takes a list of lists of integers as input and returns the sum of all integers in the lists.	def sum_all_integers(list_of_lists): return sum(sum(sublist) for sublist in list_of_lists)
Given a list of integers in Python, write a function to count the number of elements that are greater than their previous element.	def count_increasing(lst): count = 0 for i in range(1, len(lst)): if lst[i] > lst[i-1]: count += 1 return count
Write a Python function that takes a string as an input and returns a dictionary where the keys are the characters in the string and the values are the frequencies of these characters.	def char_frequency(s): freq = {} for char in s: if char in freq: freq[char] += 1 else: freq[char] = 1 return freq
Create a Python function that takes a list of integers as input and returns the sum of all numbers that are perfect squares.	import math def sum_squares(lst): return sum(i for i in lst if math.sqrt(i) % 1 == 0)
Write a Python function that takes a list of strings as input and returns a new list that contains only the strings that are longer than the average length of all strings.	def longer_than_avg(lst): avg_len = sum(len(s) for s in lst) / len(lst) return [s for s in lst if len(s) > avg_len]
Implement a Python function that takes a list of integers as input and returns the number of consecutive pairs of numbers that have a difference of 1.	def count_consecutive_pairs(lst): count = 0 for i in range(len(lst) - 1): if abs(lst[i] - lst[i+1]) == 1: count += 1 return count
Write a function that takes in a string and returns the string with all vowels removed.	def remove_vowels(s): vowels = 'aeiouAEIOU' return ''.join([c for c in s if c not in vowels])
Write a Python program to check if a list of integers contains any duplicates.	def has_duplicates(lst): return len(lst) != len(set(lst))
Write a function that takes in a list of strings and returns a new list with all strings sorted in alphabetical order.	def sort_strings(lst): return sorted(lst)
Write a function that takes in an integer and returns True if it is a power of 2, and False otherwise.	def is_power_of_two(n): if n <= 0: return False return (n & (n - 1) == 0)
Write a function that takes in a list of integers and returns the sum of all even numbers in the list.	def sum_even_numbers(lst): return sum([x for x in lst if x % 2 == 0])
Create a function 'is_prime' that takes an integer ('n') as input and returns 'True' if the number is prime, 'False' otherwise.	def is_prime(n): if n <= 1: return False if n == 2: return True if n % 2 == 0: return False sqrt_n = int(n**0.5) + 1 for i in range(3, sqrt_n, 2): if n % i == 0: return False return True
Create a function 'count_vowels' that takes a string ('s') as input and returns the count of vowels in the string.	def count_vowels(s): vowels = 'aeiou' count = 0 for char in s: if char.lower() in vowels: count += 1 return count
Write a function 'find_max' that takes a list of integers ('numbers') as input and returns the maximum number in the list.	def find_max(numbers): max_num = numbers[0] for num in numbers: if num > max_num: max_num = num return max_num
Create a function 'is_anagram' that takes two strings ('s1' and 's2') as input and returns 'True' if the strings are anagrams of each other, 'False' otherwise.	def is_anagram(s1, s2): if sorted(s1) == sorted(s2): return True else: return False
Create a function 'calculate_average' that takes a list of numbers ('numbers') as input and returns the average of the numbers.	def calculate_average(numbers): return sum(numbers) / len(numbers)
Write a function that takes a string as input and returns the count of all occurrences of the substring 'abc' in the string.	def count_substring(s): return s.count('abc')
Create a class called Circle with attributes center and radius. The class should have methods to calculate the area and circumference.	import math class Circle: def __init__(self, center, radius): self.center = center self.radius = radius def calculate_area(self): return math.pi * (self.radius ** 2) def calculate_circumference(self): return 2 * math.pi * self.radius
Write a function that takes a list of strings as input and returns a single string that is the concatenation of all strings in the list separated by a comma and a space.	def concatenate_strings(lst): return ', '.join(lst)
Create a function that takes a list of integers as input and returns the count of all prime numbers in the list.	def count_primes(lst): def is_prime(n): if n < 2: return False for i in range(2, int(n ** 0.5) + 1): if n % i == 0: return False return True return sum(1 for num in lst if is_prime(num))
Write a function that takes a positive integer n as input and returns a list of the first n Fibonacci numbers.	def fibonacci_numbers(n): if n <= 0: return [] fib_sequence = [0, 1] while len(fib_sequence) < n: fib_sequence.append(fib_sequence[-1] + fib_sequence[-2]) return fib_sequence[:n]
Write a function to count the number of words in a given string that are longer than n characters.	def count_long_words(string, n): words = string.split() count = 0 for word in words: if len(word) > n: count += 1 return count
Create a class called Student that has attributes for the student's name and grades. The class should have methods to add grades and calculate the average grade.	class Student: def __init__(self, name): self.name = name self.grades = [] def add_grade(self, grade): self.grades.append(grade) def calculate_average(self): return sum(self.grades) / len(self.grades)
Implement a function to find the maximum product of three numbers in a given list.	def max_product_of_three(lst): lst.sort() return max(lst[-1] * lst[-2] * lst[-3], lst[0] * lst[1] * lst[-1])
Create a program that takes a list of strings as input and returns the list with all strings converted to uppercase.	def convert_to_uppercase(lst): return [string.upper() for string in lst]
Write a function to find the longest common prefix in a list of strings.	def longest_common_prefix(lst): if not lst: return "" prefix = lst[0] for string in lst[1:]: while not string.startswith(prefix): prefix = prefix[:-1] return prefix
You need to write a Python function that takes a string as input and returns the string with all vowels removed.	def remove_vowels(input_string): vowels = 'aeiouAEIOU' new_string = '' for char in input_string: if char not in vowels: new_string += char return new_string
Write a Python function to count the number of times a specific word appears in a given sentence.	def count_word(sentence, word): words = sentence.split() count = 0 for w in words: if w.lower() == word.lower(): count += 1 return count
Create a Python function that takes a list of integers as input and returns a new list that contains all the prime numbers from the original list.	def get_prime_numbers(num_list): def is_prime(n): if n < 2: return False for i in range(2, int(n**0.5) + 1): if n % i == 0: return False return True prime_numbers = [n for n in num_list if is_prime(n)] return prime_numbers
Write a Python function that takes a list of strings as input and returns a new list that contains all the strings in uppercase.	def uppercase_strings(string_list): new_list = [s.upper() for s in string_list] return new_list
You need to write a Python function that takes a dictionary as input and returns a new dictionary that contains only the key-value pairs where the value is greater than a specified threshold.	def filter_dict(input_dict, threshold): new_dict = {k: v for k, v in input_dict.items() if v > threshold} return new_dict
Write a Python program that prints out all the Armstrong numbers up to a given input number.	def armstrong_numbers(n): for i in range(1, n+1): sum = 0 temp = i while temp > 0: digit = temp % 10 sum += digit ** 3 temp //= 10 if i == sum: print(i)
Write a Python function to check if a given string is a palindrome or not.	def is_palindrome(s): return s == s[::-1]
You are given a list of numbers. Create a Python function that removes all the duplicate numbers from the list.	def remove_duplicates(lst): return list(set(lst))
Write a Python function that accepts a string as input and returns the count of vowels in the string.	def count_vowels(s): count = 0 for char in s: if char.lower() in 'aeiou': count += 1 return count
Write a Python function that accepts two lists of numbers as input and returns their intersection.	def intersection(lst1, lst2): return list(set(lst1) & set(lst2))
Write a Python function to find the middle element of a list. If the list has an even number of elements, the function should return the two middle elements. Otherwise, it should return the single middle element.	def find_middle_element(lst): length = len(lst) mid = length // 2 if length % 2 == 0: return lst[mid-1:mid+1] else: return [lst[mid]]
Create a function to replace all occurrences of a substring within a string with a new substring.	def replace_substring(string, old, new): return string.replace(old, new)
Write a Python function to sort a list of integers in ascending order. If the list is empty, the function should return an empty list.	def sort_list(lst): if not lst: return [] else: return sorted(lst)
Create a function to find the sum of all even numbers in a list.	def sum_even_numbers(lst): return sum(num for num in lst if num % 2 == 0)
Write a Python function to remove duplicates from a list while preserving the original order. If the list is empty, the function should return an empty list.	def remove_duplicates(lst): if not lst: return [] else: seen = set() new_lst = [] for item in lst: if item not in seen: seen.add(item) new_lst.append(item) return new_lst
Write a Python function to calculate the sum of all elements in a 2D list.	def calculate_sum_2d_list(lst): sum = 0 for sublist in lst: for num in sublist: sum += num return sum
You are given a list of strings. Write a Python function to concatenate all the strings in the list into a single string.	def concatenate_strings(lst): concatenated_string = "" for string in lst: concatenated_string += string return concatenated_string
Given a list of integers, write a function to find the first duplicate in the list and return it. If no duplicates are found, return -1.	def find_first_duplicate(lst): seen = set() for num in lst: if num in seen: return num seen.add(num) return -1
Create a function that takes in a 2D list of integers and returns the 2D list sorted in ascending order based on the sum of each sublist.	def sort_2d_list(lst): return sorted(lst, key=sum)
You are given a string s. Write a Python function to count the number of vowels in the string.	def count_vowels(s): vowels = "aeiou" count = 0 for char in s.lower(): if char in vowels: count += 1 return count
Write a function to count the number of words in a given string.	def count_words(s): words = s.split() return len(words)
Write a function that takes a list of integers as input and returns the second smallest number.	def second_smallest(lst): if len(lst) < 2: return None return sorted(set(lst))[1]
Write a function that takes a string as input and returns True if it is a palindrome, False otherwise.	def is_palindrome(s): return s == s[::-1]
Write a function to check if a given number is prime.	def is_prime(n): if n <= 1: return False if n <= 3: return True if n % 2 == 0 or n % 3 == 0: return False i = 5 while i * i <= n: if n % i == 0 or n % (i + 2) == 0: return False i += 6 return True
Write a function that takes a list of tuples as input, where each tuple represents a rectangle with its width and height, and returns the total area of all rectangles.	def total_area(rectangles): return sum(width * height for width, height in rectangles)
Write a Python function to find the maximum number of consecutive 1's in a binary array.	def max_consecutive_ones(binary_array): max_ones = 0 current_ones = 0 for binary_digit in binary_array: if binary_digit == 1: current_ones += 1 max_ones = max(max_ones, current_ones) else: current_ones = 0 return max_ones
Create a function 'is_palindrome' that takes a string as input and returns True if the string is a palindrome, False otherwise.	def is_palindrome(s): return s == s[::-1]
Implement a class called `Rectangle` with attributes `length` and `width`, and methods `area` and `perimeter`.	class Rectangle: def __init__(self, length, width): self.length = length self.width = width def area(self): return self.length * self.width def perimeter(self): return 2 * (self.length + self.width)
Write a function that takes in a string and returns the string with all vowels removed.	def remove_vowels(s): vowels = 'aeiouAEIOU' return ''.join([char for char in s if char not in vowels])
Create a function 'count_pairs' that takes a list of integers and an integer 'target_sum' as input, and returns the number of pairs in the list that sum up to the 'target_sum'.	def count_pairs(numbers, target_sum): num_count = {} count = 0 for num in numbers: complement = target_sum - num if complement in num_count: count += num_count[complement] num_count[num] = num_count.get(num, 0) + 1 return count
Write a program that takes in a list of words as input and returns a dictionary where the keys are the words and the values are their frequencies of occurrence in the list.	def frequency_dict(word_list): freq_dict = {} for word in word_list: if word in freq_dict: freq_dict[word] += 1 else: freq_dict[word] = 1 return freq_dict
Write a function that takes in a string as input and returns True if the string is a palindrome, and False otherwise.	def is_palindrome(s): return s == s[::-1]
Write a program that takes in two lists of integers as input and returns their union.	def union_lists(list1, list2): return list(set(list1 + list2))
Write a function that takes in an integer as input and returns the number of prime factors it has.	def count_prime_factors(n): factors = 0 for i in range(2, int(n**0.5) + 1): if n % i == 0: if is_prime(i): factors += 1 if i * i != n and is_prime(n // i): factors += 1 if is_prime(n): factors += 1 return factors def is_prime(num): if num < 2: return False for i in range(2, int(num**0.5) + 1): if num % i == 0: return False return True
Write a program that takes in a list of integers as input and returns True if the list is in ascending order, and False otherwise.	def is_ascending_order(num_list): return num_list == sorted(num_list)
Write a Python function that takes a list of strings as input and returns a new list containing only the strings that start with a vowel.	def filter_vowels(lst): vowels = 'aeiouAEIOU' return [word for word in lst if word[0] in vowels]
Create a Python function that takes a list of integers as input and returns a new list containing the squares of all the odd numbers in the list.	def square_odd_numbers(lst): return [num ** 2 for num in lst if num % 2 != 0]
Write a Python function that takes a list of tuples as input, where each tuple contains a string and an integer. The function should return a dictionary where the keys are the strings and the values are the sums of the integers corresponding to each string.	def sum_tuples(lst): result = {} for item in lst: if item[0] in result: result[item[0]] += item[1] else: result[item[0]] = item[1] return result
You are given a list of lists of integers. Write a Python function that returns a new list containing the averages of each sublist.	def average_sublists(lst): return [sum(sublist) / len(sublist) for sublist in lst]
Create a Python function that takes a list of strings as input and returns a new list containing the strings in reverse order, but only if they have a length greater than 3.	def reverse_long_strings(lst): return [word[::-1] for word in lst if len(word) > 3]
Create a Python function that takes two integer lists, both containing identical number of elements, and returns a list of tuples, where each tuple contains corresponding elements from both lists.	def list_to_tuple(lst1, lst2): assert len(lst1) == len(lst2), "Both lists must have the same number of elements" result = list(zip(lst1, lst2)) return result
Write a Python function that takes a dictionary as an input and returns a sorted list of keys in descending order of their corresponding values.	def sort_dict_by_value(d): return sorted(d, key=d.get, reverse=True)
Create a Python function that calculates the average of all the numbers in a given list, excluding zeros.	def average_without_zero(lst): count = 0 total = 0 for num in lst: if num != 0: total += num count += 1 if count == 0: return 0 else: return total / count
Write a Python function that takes a string as an input and returns the count of each word in the string.	def count_word_frequency(s): words = s.split() word_freq = {} for word in words: if word in word_freq: word_freq[word] += 1 else: word_freq[word] = 1 return word_freq
Create a Python function that takes a list of strings as an input and returns the longest string in the list.	def longest_string(lst): return max(lst, key=len)
Write a Python function to count the number of vowels in a given string.	def count_vowels(s): vowels = 'aeiouAEIOU' count = 0 for char in s: if char in vowels: count += 1 return count
Write a Python function to calculate the average of all the numbers in a given list.	def calculate_average(lst): if len(lst) == 0: return 0 else: sum_of_numbers = sum(lst) average = sum_of_numbers / len(lst) return average
Write a Python function to find the maximum element in a given list of integers.	def find_max(lst): return max(lst)
Write a Python function to remove all duplicates from a given list.	def remove_duplicates(lst): return list(set(lst))
Write a Python function to find all the indices of a given element in a list.	def find_indices(lst, elem): indices = [i for i, x in enumerate(lst) if x == elem] return indices
Write a function that takes a list of integers as input and returns a new list with all even numbers from the original list.	def even_numbers(lst): return [num for num in lst if num % 2 == 0]
Design a function that accepts a string as input and returns the number of vowels in the string.	def count_vowels(s): vowels = 'aeiou' return sum(1 for char in s.lower() if char in vowels)
Write a function that takes a list of strings as input and returns a new list with all strings that start with a vowel.	def strings_starting_with_vowel(lst): vowels = 'aeiou' return [s for s in lst if s[0].lower() in vowels]
Write a function that takes two lists of integers as input and returns a new list containing the intersection of the two lists.	def intersection(lst1, lst2): return [num for num in lst1 if num in lst2]
Write a class called "Circle" with attributes "radius" and methods "area" and "circumference".	import math class Circle: def __init__(self, radius): self.radius = radius def area(self): return math.pi * (self.radius ** 2) def circumference(self): return 2 * math.pi * self.radius
Write a function that takes a list of integers as input and returns a list of integers where each integer is multiplied by two.	def multiply_by_two(lst): return [i * 2 for i in lst]
Write a function that takes a list of strings as input and returns a list of strings where each string has its first letter capitalized.	def capitalize_first_letter(lst): return [s.capitalize() for s in lst]
Write a function that takes a list of lists as input and returns a single list containing all the elements from the sub-lists.	def flatten_list(lst): return [item for sublist in lst for item in sublist]
Write a function that takes a list of integers as input and returns True if the list contains at least one even integer, False otherwise.	def has_even(lst): return any(i % 2 == 0 for i in lst)
Write a function that takes a list of strings as input and returns a dictionary where each key is a string from the list and its corresponding value is the length of the string.	def string_length_dict(lst): return {s: len(s) for s in lst}
Write a function that takes a list of strings as input and returns the longest string in the list.	``` def longest_string(lst): longest = "" for string in lst: if len(string) > len(longest): longest = string return longest ```
Write a function that takes a list of integers as input and returns the average of all odd numbers in the list.	``` def average_odd_numbers(lst): sum = 0 count = 0 for num in lst: if num % 2 != 0: sum += num count += 1 if count == 0: return 0 else: return sum / count ```
Write a function that takes a list of strings as input and returns a new list which contains all strings that start with a vowel.	``` def strings_starting_with_vowel(lst): vowels = ['a', 'e', 'i', 'o', 'u'] new_list = [] for string in lst: if string[0].lower() in vowels: new_list.append(string) return new_list ```
Write a function that takes a list of integers as input and returns the product of all numbers in the list that are greater than 5.	``` def product_of_numbers_greater_than_five(lst): product = 1 for num in lst: if num > 5: product *= num return product ```
Write a function that takes a dictionary as input and returns a new dictionary which contains only the key-value pairs where the value is greater than 10.	``` def filter_dict_by_value(d): new_dict = {} for key, value in d.items(): if value > 10: new_dict[key] = value return new_dict ```
Write a Python function that accepts a list of strings as input and returns a new list containing only the strings that start with a vowel.	def filter_vowel_strings(input_list): vowels = 'aeiouAEIOU' result = [string for string in input_list if string[0] in vowels] return result
Create a Python function that takes a list of integers as input and returns the average of the squares of all the numbers in the list.	def average_of_squares(numbers): squares = [number ** 2 for number in numbers] average = sum(squares) / len(squares) return average
Design a Python program to check if a given string is a palindrome using a function.	def is_palindrome(input_string): reversed_string = input_string[::-1] return input_string == reversed_string
Implement a function that takes a list of integers and returns the sum of the cubes of all the numbers in the list.	def sum_of_cubes(numbers): cubes = [number ** 3 for number in numbers] total_sum = sum(cubes) return total_sum
Write a Python function that accepts a list of strings as input and returns the longest string in the list.	def longest_string(input_list): longest = max(input_list, key=len) return longest
Write a Python program that takes a list of integers as input and returns the list with all even numbers removed.	def remove_even_numbers(lst): return [num for num in lst if num % 2 != 0]
Write a function that takes a string as input and returns the string with all digits removed.	def remove_digits(s): return ''.join([char for char in s if not char.isdigit()])
Write a Python program that takes a list of strings as input and returns the shortest string in the list.	def find_shortest_string(lst): return min(lst, key=len)
Write a Python function to calculate the average of all the elements in a given list.	def calculate_average(lst): return sum(lst) / len(lst)
Write a Python program that takes a string as input and returns the string with the first and last characters swapped.	def swap_first_last(s): if len(s) > 1: return s[-1] + s[1:-1] + s[0] else: return s
Write a Python function that takes a list of integers as input and returns the square of the maximum integer in the list.	def max_square(lst): if not lst: return None max_val = max(lst) return max_val ** 2
Create a Python function to check if a given list of integers is in ascending order. The function should return True if the list is in ascending order and False otherwise.	def is_ascending(lst): return all(lst[i] <= lst[i+1] for i in range(len(lst)-1))
Write a Python function that takes a string as input and returns the number of vowels in the string.	def count_vowels(s): vowels = 'aeiouAEIOU' return sum(1 for char in s if char in vowels)
Write a Python function that takes a list of lists as input and returns the list with the maximum length.	def longest_sublist(lst): if not lst: return None return max(lst, key=len)
Create a Python function to check if a given list of integers contains exactly three odd numbers. The function should return True if the list contains exactly three odd numbers and False otherwise.	def exactly_three_odd(lst): return sum(1 for num in lst if num % 2 != 0) == 3
Write a function to calculate the average of a list of numbers, ignoring any non-numeric values in the list.	def calculate_average(lst): numeric_values = [x for x in lst if isinstance(x, (int, float))] if len(numeric_values) == 0: return 0 return sum(numeric_values) / len(numeric_values)
Create a Python class that represents a Vehicle. The class should have attributes for vehicle ID, make, model, year, and mileage. The class should also have methods for updating the mileage and getting the vehicle information as a string.	class Vehicle: def __init__(self, vehicle_id, make, model, year, mileage): self.vehicle_id = vehicle_id self.make = make self.model = model self.year = year self.mileage = mileage def update_mileage(self, new_mileage): self.mileage = new_mileage def get_vehicle_info(self): return f"Vehicle ID: {self.vehicle_id}, Make: {self.make}, Model: {self.model}, Year: {self.year}, Mileage: {self.mileage}"
Write a function that takes a string as input and returns the string with all vowels removed.	def remove_vowels(s): vowels = 'aeiouAEIOU' return ''.join([c for c in s if c not in vowels])
Create a Python function that takes a dictionary as input and returns a new dictionary with the keys and values swapped.	def swap_dict(d): return {v: k for k, v in d.items()}
Write a function to find the longest word in a given string.	def find_longest_word(s): words = s.split() longest_word = max(words, key=len) return longest_word
Define a function that takes a string as input and returns the count of uppercase letters in the string.	def count_uppercase(s): count = 0 for char in s: if char.isupper(): count += 1 return count
Write a function that takes a list of integers as input and returns the index of the first occurrence of a number greater than or equal to 0.5 times the maximum value in the list.	def find_index(lst): max_val = max(lst) threshold = max_val * 0.5 for i, val in enumerate(lst): if val >= threshold: return i return -1
Implement a function that takes a string as input and returns a new string where all vowels have been replaced with their corresponding uppercase counterparts.	def replace_vowels(s): vowels = 'aeiou' new_string = '' for char in s: if char in vowels: new_string += char.upper() else: new_string += char return new_string
Write a function that takes a list of lists as input and returns a dictionary where the keys are the list indices and the values are the list elements.	def list_to_dict(lst): return {i: sublst for i, sublst in enumerate(lst)}
Define a function that takes two integers as input and returns their greatest common divisor.	def gcd(a, b): while b: a, b = b, a % b return a
Write a Python function that takes a list of strings as input and returns the count of strings that start with a lowercase letter.	def count_lower(input_list): count = 0 for string in input_list: if string and string[0].islower(): count += 1 return count
Write a Python function that takes a list of tuples as input, where each tuple contains two integers. The function should return a new list of tuples, where each tuple contains the sum of the two integers in the original tuple.	def sum_tuples(tuple_list): result = [] for tuple in tuple_list: result.append((tuple[0] + tuple[1],)) return result
Create a Python function that takes a string as input and returns the string with all occurrences of a substring removed.	def remove_substring(input_string, sub_string): return input_string.replace(sub_string, '')
You are given a list of lists, where each inner list represents a matrix row. Create a Python function that transposes this matrix, i.e., returns a new list of lists where the rows of the original matrix are columns in the new matrix.	def transpose_matrix(matrix): return [[row[i] for row in matrix] for i in range(len(matrix[0]))]
Write a function to check if a given string is a palindrome, ignoring case and non-alphanumeric characters.	def is_palindrome(s): s = ''.join(e for e in s if e.isalnum()).lower() return s == s[::-1]
Write a function that takes a list of strings as input and returns the number of strings that contain at least one digit.	def count_strings_with_digits(lst): count = 0 for s in lst: if any(char.isdigit() for char in s): count += 1 return count
Write a function that takes a list of integers as input and returns the count of elements that appear exactly twice.	def count_twice_elements(lst): freq = {} for num in lst: if num in freq: freq[num] += 1 else: freq[num] = 1 return sum(1 for val in freq.values() if val == 2)
Create a function that checks if a given string contains at least one uppercase letter, one lowercase letter, and one digit.	def check_string_chars(s): has_uppercase = any(char.isupper() for char in s) has_lowercase = any(char.islower() for char in s) has_digit = any(char.isdigit() for char in s) return has_uppercase and has_lowercase and has_digit
Write a function to count the number of substrings in a given string that start and end with the same character.	def count_same_start_end_substrings(s): count = 0 for i in range(len(s)): for j in range(i + 1, len(s) + 1): if s[i] == s[j - 1]: count += 1 return count
Write a Python function that takes a list of strings and returns a new list containing only the strings that have more than 3 characters.	def filter_strings(lst): return [s for s in lst if len(s) > 3]
Create a Python function that takes two lists of integers as input and returns the product of the corresponding elements in both lists.	def multiply_corresponding_elements(lst1, lst2): return [x*y for x, y in zip(lst1, lst2)]
Design a Python function that takes a string as input and returns the number of vowels in the string.	def count_vowels(s): vowels = 'aeiou' return sum(1 for char in s.lower() if char in vowels)
Write a Python function that takes a list of lists as input and returns the maximum value among all the sublists.	def max_value_in_sublists(lst): return max(max(sublist) for sublist in lst)
Create a Python function that takes a dictionary as input and returns a new dictionary with the keys and values swapped.	def swap_dictKeyValue(d): return {value: key for key, value in d.items()}
Write a Python program to find the longest word in a given list of words.	def longest_word(lst): return max(lst, key=len);
Write a Python function to create a set of all permutations of a given string.	import itertools def all_permutations(s): return set([''.join(p) for p in itertools.permutations(s)]);
Write a Python function to check if a given string is a palindrome.	def is_palindrome(s): return s == s[::-1];
Write a Python function to find the first duplicate in a given list of integers.	def first_duplicate(lst): seen = set() for num in lst: if num in seen: return num seen.add(num) return None;
Write a Python function to find the sum of all numbers in a given list of strings that represent numbers.	def sum_numbers(lst): return sum(float(s) for s in lst if s.replace('.','',1).isdigit());
Write a function that takes a list of integers and returns the count of numbers that are greater than their previous number in the list_.	def count_greater_than_previous(lst): count = 0 for i in range(1, len(lst)): if lst[i] > lst[i-1]: count += 1 return count
Write a function that takes a string and returns True if it contains at least three vowels, False otherwise.	def has_at_least_three_vowels(s): vowels = 'aeiou' return sum(1 for char in s.lower() if char in vowels) >= 3
Write a Python function to find the maximum length of a string in a given list of strings.	def max_string_length(string_list): return max(len(string) for string in string_list)
Write a Python function to find the middle element of a given list.	def find_middle_element(input_list): middle_index = len(input_list) // 2 if len(input_list) % 2 == 0: return input_list[middle_index-1:middle_index+1] else: return [input_list[middle_index]]
Write a Python function to find the count of even numbers in a given list of integers.	def count_even_numbers(number_list): return len([number for number in number_list if number % 2 == 0])
Write a Python function to find the sum of squares of all numbers in a given list of integers.	def sum_of_squares(number_list): return sum([number ** 2 for number in number_list])
Write a Python function to find the frequency of a given character in a string.	def char_frequency(input_string, target_char): return input_string.count(target_char)
Write a function that takes a list of strings as input, where each string represents a date in the format "DD/MM/YYYY", and returns a list of strings in the format "YYYY/MM/DD".	def format_date(lst): new_lst = [] for date in lst: day, month, year = date.split('/') new_lst.append(f"{year}/{month}/{day}") return new_lst
Write a Python function that takes a list of integers as input and returns the list with all negative numbers replaced by their absolute values.	def replace_negative(lst): return [abs(i) if i < 0 else i for i in lst]
Write a function that takes a string as input and returns the string with all vowels removed.	def remove_vowels(s): vowels = 'aeiouAEIOU' return ''.join([char for char in s if char not in vowels])
Write a Python function that takes a list of lists as input, where each sublist contains integers, and returns the list of lists sorted by the sum of integers in each sublist.	def sort_by_sum(lst): return sorted(lst, key=sum)
Write a function that takes a dictionary as input and returns a new dictionary where the keys and values are swapped.	def swap_key_value(d): return {v: k for k, v in d.items()}
Write a Python function to convert a given binary number to decimal number.	``` def binary_to_decimal(binary): decimal = int(binary, 2) return decimal ```
Create a Python class that represents a Rectangle. The class should have attributes for length and width. The class should also have methods for calculating the area and perimeter.	``` class Rectangle: def __init__(self, length, width): self.length = length self.width = width def area(self): return self.length * self.width def perimeter(self): return 2 * (self.length + self.width) ```
Write a Python function to find all the prime numbers in a given list of integers.	``` def find_primes(numbers): def is_prime(n): if n < 2: return False for i in range(2, int(n**0.5) + 1): if n % i == 0: return False return True return [n for n in numbers if is_prime(n)] ```
Write a function that takes in a list of strings and returns the longest string in the list.	``` def longest_string(strings): return max(strings, key=len) ```
Create a Python function that takes a list of tuples, where each tuple represents a student's name and grade, and returns a dictionary where the keys are the student names and the values are their corresponding grades.	``` def students_to_dict(students): return {name: grade for name, grade in students} ```
Write a function that takes a list of strings as input and returns a new list containing only the strings that start with a vowel.	def vowel_strings(lst): vowels = 'aeiouAEIOU' return [string for string in lst if string and string[0] in vowels]
Implement a function that takes two lists of integers as input and returns a new list containing elements that are present in both lists.	def common_elements(lst1, lst2): return [element for element in lst1 if element in lst2]
Write a function that takes a list of integers as input and returns the count of all prime numbers in the list.	def count_primes(lst): def is_prime(n): if n < 2: return False for i in range(2, int(n**0.5) + 1): if n % i == 0: return False return True return sum(1 for num in lst if is_prime(num))
Design a Python function that takes a string as input and returns the string with all vowels removed.	def remove_vowels(s): vowels = 'aeiouAEIOU' return ''.join(char for char in s if char not in vowels)
Write a function that takes a dictionary as input where the keys are strings and the values are lists of strings. The function should return a new dictionary where the keys are the same, but the values are the sorted lists of strings.	def sort_string_lists(d): return {key: sorted(value) for key, value in d.items()}
Write a function that takes a list of numbers as input and returns the count of prime numbers in the list.	def count_primes(lst): def is_prime(n): if n < 2: return False for i in range(2, int(n**0.5) + 1): if n % i == 0: return False return True return len([num for num in lst if is_prime(num)])
Write a function that takes a string as input and returns the string with all occurrences of 'a' replaced with 'A'.	def replace_a_with_A(s): return s.replace('a', 'A')
Write a function that takes a list of strings as input and returns a new list containing only the strings that are in uppercase.	def filter_uppercase_strings(lst): return [s for s in lst if s.isupper()]
Write a function that takes two lists as input and returns the intersection of the two lists, i.e., a new list containing only the elements that are present in both lists.	def intersection(lst1, lst2): return [element for element in lst1 if element in lst2]
Write a function that takes a string as input and returns the string with all non-alphabetic characters removed.	def remove_non_alphabetic_chars(s): return ''.join(char for char in s if char.isalpha())
Write a Python function that takes a string as input and returns the number of consecutive vowels in the string, excluding non-alphabetic characters and counting each vowel group separately.	def count_consecutive_vowels(s): s = ''.join(e for e in s if e.isalpha()).lower() vowels = 'aeiou' max_count = 0 curr_count = 0 for char in s: if char in vowels: curr_count += 1 max_count = max(max_count, curr_count) else: curr_count = 0 return max_count
Given a list of strings, write a function that returns the list sorted in descending order based on the string length.	def sort_strings_by_length(lst): return sorted(lst, key=len, reverse=True)
Write a Python function that takes a list of integers as input and returns the maximum sum of a contiguous subarray within the one-dimensional array.	def max_subarray_sum(lst): max_sum = float('-inf') curr_sum = 0 for num in lst: curr_sum = max(num, curr_sum + num) max_sum = max(max_sum, curr_sum) return max_sum
Write a Python function that takes a string as input and returns the string with all consonants replaced with '*'.	def replace_consonants(s): vowels = 'aeiouAEIOU' return ''.join('*' if char.isalpha() and char not in vowels else char for char in s)
Given a list of integers, write a function that returns the number of pairs of integers in the list that have a difference of exactly 1.	def count_pairs_with_diff_1(lst): count = 0 lst = set(lst) for num in lst: if num + 1 in lst: count += 1 return count
Write a Python function that takes a sentence as input and returns the sentence with all vowels removed.	def remove_vowels(input_sentence): vowels = 'aeiouAEIOU' output_sentence = ''.join([char for char in input_sentence if char not in vowels]) return output_sentence
Write a Python function that takes a list of strings as input and returns the list sorted in descending order of string lengths.	def sort_by_length(input_list): return sorted(input_list, key=len, reverse=True)
Write a function to calculate the area of a circle given its radius.	import math def calculate_circle_area(radius): return math.pi * (radius ** 2)
Implement a function that uses recursion to find the nth Fibonacci number.	def fibonacci(n): if n <= 0: return "Input should be a positive integer" elif n == 1: return 0 elif n == 2: return 1 else: return fibonacci(n-1) + fibonacci(n-2)
Write a function that takes a list of dictionaries as input and returns the dictionary with the maximum value for a specified key.	def find_max_dict(input_list, key): return max(input_list, key=lambda x:x[key])
Implement a function to convert a binary number represented as a string to a decimal number.	def binary_to_decimal(binary_string): return int(binary_string, 2)
Write a function that takes a list of integers as input and returns the count of prime numbers within the list. For example, if the input list is [1, 2, 3, 4, 5, 6, 7, 8, 9, 10], the function should return 4.	def count_prime_numbers(lst): def is_prime(n): if n <= 1: return False for i in range(2, int(n ** 0.5) + 1): if n % i == 0: return False return True count = 0 for num in lst: if is_prime(num): count += 1 return count
Create a program that takes a string as input and returns the string with all vowels removed. For example, if the input string is 'Hello World', the function should return 'Hll Wrld'.	def remove_vowels(s): vowels = 'aeiouAEIOU' return ''.join([char for char in s if char not in vowels])
Write a function that takes a list of strings as input and returns the longest string in the list. For example, if the input list is ['apple', 'banana', 'cherry'], the function should return 'banana'.	def find_longest_string(lst): return max(lst, key=len)
Create a program that takes a dictionary as input and returns a new dictionary with the keys and values swapped. For example, if the input dictionary is {'a': 1, 'b': 2, 'c': 3}, the function should return {1: 'a', 2: 'b', 3: 'c'}.	def swap_dict(dict): return {v: k for k, v in dict.items()}
Write a function that takes a list of integers as input and returns the second highest number in the list. For example, if the input list is [1, 2, 3, 4, 5], the function should return 4.	def find_second_highest(lst): if len(lst) < 2: return None highest = second_highest = float('-inf') for num in lst: if num > highest: second_highest = highest highest = num elif num > second_highest and num != highest: second_highest = num return second_highest
Write a function that takes two lists of integers as input and returns a list of integers that are common to both lists.	def find_common_elements(list1, list2): return [element for element in list1 if element in list2]
Write a function that takes a list of strings as input and returns the longest string in the list.	def find_longest_string(string_list): return max(string_list, key=len)
Write a function that takes a list of integers as input and returns the sum of the squares of all the elements in the list.	def sum_of_squares(num_list): return sum(num ** 2 for num in num_list)
Write a function that takes a list of strings as input and returns the strings in reverse order.	def reverse_string_order(string_list): return string_list[::-1]
Write a function that takes a list of integers as input and returns the maximum difference between any two elements in the list.	def max_difference(num_list): return max(num_list) - min(num_list)
Create a function to count the number of trials it takes to get at least one success in a binomial distribution.	def generate_fibonacci(n): if n <= 0: return [] elif n == 1: return [0] elif n == 2: return [0,1] else: fib_list = [0,1] while len(fib_list) < n: fib_list.append(fib_list[-1] + fib_list[-2]) return fib_list;
Write a Python function to convert a list of hexadecimal color codes to their corresponding RGB values.	import random def binomial_trials(p): trials = 0 success = False while not success: trials += 1 success = random.random() < p return trials;
Create a function that finds the longest common prefix in a list of strings.	def hex_to_rgb(hex_colors): rgb_colors = [] for hex_color in hex_colors: hex_color = hex_color.lstrip('#') rgb = tuple(int(hex_color[i:i+2], 16) for i in (0, 2, 4)) rgb_colors.append(rgb) return rgb_colors;
Write a Python function to find the first duplicate in a list of integers.	def longest_common_prefix(str_list): if not str_list: return "" prefix = str_list[0] for s in str_list[1:]: while not s.startswith(prefix): prefix = prefix[:-1] return prefix;
Write a function that takes a list of strings as input and returns the string with the maximum length.	def find_longest_string(lst): return max(lst, key=len)
You are given a list of tuples where each tuple contains a student's name and their corresponding score. Write a function `find_top_scorer` that takes this list as an input and returns the name of the student with the highest score.	def find_top_scorer(students): return max(students, key=lambda x: x[1])[0]
Write a function that takes a list of integers as input and returns a new list where all prime numbers are removed.	def remove_primes(lst): def is_prime(n): if n < 2: return False for i in range(2, int(n**0.5) + 1): if n % i == 0: return False return True return [i for i in lst if not is_prime(i)]
You are given a list of integers and an integer `target_sum`. Write a function `find_pairs_with_sum` that takes the list and the target sum as inputs and returns all pairs of integers in the list that sum up to the target sum.	def find_pairs_with_sum(lst, target_sum): seen = set() pairs = set() for num in lst: complement = target_sum - num if complement in seen: pairs.add((min(num, complement), max(num, complement))) seen.add(num) return list(pairs)
Write a class called "Circle" with attributes "radius" and methods "area" and "circumference".	import math class Circle: def __init__(self, radius): self.radius = radius def area(self): return math.pi * self.radius ** 2 def circumference(self): return 2 * math.pi * self.radius
Create a function to find the index of the first occurrence of a given character in a string.	def find_char_index(s, char): for i in range(len(s)): if s[i] == char: return i return -1 # return -1 if char is not found in the string
Write a function that takes a string as an input and returns the frequency of each character in the string as a dictionary.	def char_frequency(s): freq = {} for char in s: if char in freq: freq[char] += 1 else: freq[char] = 1 return freq
Given a string of parentheses, write a function to determine if the string is balanced, i.e., every opening parenthesis has a corresponding closing parenthesis.	def is_balanced(s): stack = [] for char in s: if char == '(': stack.append(char) elif char == ')': if not stack: return False stack.pop() return not stack
Write a function that takes a string as an input and returns the string with all occurrences of a given substring removed.	def remove_substring(s, sub): return s.replace(sub, '')
Given a string, write a function to find the length of the longest substring without repeating characters.	def longest_substring(s): char_set = set() left = 0 max_length = 0 for right in range(len(s)): while s[right] in char_set: char_set.remove(s[left]) left += 1 char_set.add(s[right]) max_length = max(max_length, right - left + 1) return max_length
Write a Python function that takes a list of integers as input and returns a list of squares of all the even numbers in the list.	def square_even_numbers(lst): return [i ** 2 for i in lst if i % 2 == 0]
Create a class called Calculator with a method called add that takes two numbers as input and returns their sum, a method called subtract that takes two numbers as input and returns their difference, and a method called multiply that takes two numbers as input and returns their product.	class Calculator: def add(self, a, b): return a + b def subtract(self, a, b): return a - b def multiply(self, a, b): return a * b
Write a Python function that takes a string as input and returns the string with all vowels removed.	def remove_vowels(s): vowels = 'aeiouAEIOU' return ''.join([c for c in s if c not in vowels])
Design a Python function that takes a list of lists as input where each inner list contains two elements: a student's name and their grade. The function should return a dictionary where the keys are the student names and the values are their grades.	def grade_dict(lst): return {name: grade for name, grade in lst}
Write a function that takes a list of strings as input and returns a list of tuples, where each tuple contains a string and its length.	def string_lengths(lst): return [(s, len(s)) for s in lst]
Write a Python function that takes a list of numbers as input and returns the difference between the largest and smallest numbers in the list.	def difference_between_largest_and_smallest(numbers): return max(numbers) - min(numbers)
Create a Python program that takes a string as input and returns the number of vowels in the string, ignoring case.	def count_vowels(s): vowels = 'aeiouAEIOU' return sum(1 for char in s if char in vowels)
Write a Python function to find the first non-repeating character in a given string.	def first_non_repeating_char(s): char_count = {} for char in s: if char in char_count: char_count[char] += 1 else: char_count[char] = 1 for char in s: if char_count[char] == 1: return char return None
Implement a function that takes a list of strings as input and returns the longest string in the list.	def longest_string(strings): return max(strings, key=len)
Write a Python function that takes a list of integers as input and returns the sum of all even numbers in the list.	def sum_even_numbers(numbers): return sum(num for num in numbers if num % 2 == 0)
Write a function that takes a list of strings as input and returns a new list with all the strings in uppercase.	def to_uppercase(input_list): return [s.upper() for s in input_list]
You are given an array of numbers. Write a function that returns the average of the squares of all numbers in the array.	def average_of_squares(numbers): squares = [n**2 for n in numbers] return sum(squares) / len(squares)
Given a list of integers, write a function that returns the sum of all the even numbers in the list.	def sum_even_numbers(numbers): return sum([n for n in numbers if n % 2 == 0])
Write a function that takes a string as input and returns True if the string is a palindrome and False otherwise.	def is_palindrome(s): return s == s[::-1]
You are given an array of strings. Write a function that sorts the array in lexicographical order, ignoring case.	def sort_strings_case_insensitive(strings): return sorted(strings, key=lambda s: s.casefold())
Write a function to find the factorial of a given positive integer.	def factorial(n): if n == 0: return 1 else: return n * factorial(n-1) return result
Create a Python function that takes a list of integers as input and returns the count of even numbers in the list.	def count_even_numbers(lst): count = 0 for num in lst: if num % 2 == 0: count += 1 return count
Write a function to check if a given string contains at least one uppercase letter.	def has_uppercase(s): for char in s: if char.isupper(): return True return False
Implement a function to calculate the average of all the elements in a given list of numbers.	def calculate_average(lst): return sum(lst) / len(lst)
Create a Python function that takes a list of strings as input and returns a new list that contains only the strings that start with a vowel.	def filter_vowel_strings(lst): vowels = 'aeiouAEIOU' result = [] for s in lst: if s[0] in vowels: result.append(s) return result
Write a Python function that takes a list of strings as input and returns a new list where every string is converted into lowercase and sorted in alphabetical order.	def sort_lowercase(lst): result = [i.lower() for i in lst] result.sort() return result
Write a function that takes a list of integers as input and returns the maximum value that can be achieved by performing a series of increments and decrements to the elements of the list, where each increment or decrement operation adds or subtracts 1 from the current value of an element.	def max_value(lst): return sum(lst)
Write a Python function that takes a list of integers as input and returns a new list containing only the elements at odd indices.	def odd_indices(lst): return [i for index, i in enumerate(lst) if index % 2 != 0]
Write a function that takes a list of integers as input and returns the sum of all prime numbers in the list.	def sum_primes(lst): def is_prime(n): if n < 2: return False for i in range(2, int(n ** 0.5) + 1): if n % i == 0: return False return True return sum(i for i in lst if is_prime(i))
Write a Python function that takes a string as input and returns a dictionary where each key is a character in the string and the value is the count of that character in the string, ignoring any whitespace characters.	def char_count(s): s = s.replace(" ", "") return {i: s.count(i) for i in set(s)}
Create a Python function that takes a list of numbers as input and returns the count of all prime numbers in the list.	def count_prime_numbers(numbers): def is_prime(n): if n <= 1: return False if n == 2: return True if n % 2 == 0: return False i = 3 while i * i <= n: if n % i == 0: return False i += 2 return True count = 0 for num in numbers: if is_prime(num): count += 1 return count
Write a Python function that takes a list of strings as input and returns the list with all strings converted to uppercase.	def convert_to_uppercase(strings): return [s.upper() for s in strings]
Develop a Python function to find the maximum and minimum values in a given list of numbers.	def find_max_min(numbers): return max(numbers), min(numbers)
Write a Python class called "Circle" with attributes "radius" and methods "area" and "circumference".	import math class Circle: def __init__(self, radius): self.radius = radius def area(self): return math.pi * (self.radius ** 2) def circumference(self): return 2 * math.pi * self.radius
Create a Python function that takes a string as input and returns the string with all vowels removed.	def remove_vowels(string): vowels = 'aeiouAEIOU' return ''.join([char for char in string if char not in vowels])
Create a class called Circle that has attributes for the circle's radius and color. The class should have methods to calculate the area and circumference of the circle, and a method to display the circle's information.	class Circle: def __init__(self, radius, color): self.radius = radius self.color = color def calculate_area(self): return 3.14 * (self.radius ** 2) def calculate_circumference(self): return 2 * 3.14 * self.radius def display_info(self): print(f"Radius: {self.radius}, Color: {self.color}, Area: {self.calculate_area()}, Circumference: {self.calculate_circumference()}")
Implement a function that takes a list of strings as input and returns the longest string in the list. If there are multiple strings of the same maximum length, the function should return all of them.	def find_longest_strings(strings): max_length = max(len(s) for s in strings) return [s for s in strings if len(s) == max_length]
Write a function that takes a dictionary as input and returns a new dictionary with all keys converted to lowercase.	def lowercase_keys(d): return {k.lower(): v for k, v in d.items()}
Implement a function that takes two lists of integers as input and returns a new list containing the elements that are common to both lists.	def find_common_elements(list1, list2): return [element for element in list1 if element in list2]
Create a class called Rectangle that has attributes for the rectangle's length and width. The class should have methods to calculate the area and perimeter of the rectangle, and a method to display the rectangle's information.	class Rectangle: def __init__(self, length, width): self.length = length self.width = width def calculate_area(self): return self.length * self.width def calculate_perimeter(self): return 2 * (self.length + self.width) def display_info(self): print(f"Length: {self.length}, Width: {self.width}, Area: {self.calculate_area()}, Perimeter: {self.calculate_perimeter()}")
Write a Python function that takes a list of integers as input and returns the sum of all even numbers in the list.	def sum_even_numbers(lst): return sum([num for num in lst if num % 2 == 0])
Design a Python program to convert miles to kilometers using a function.	def miles_to_kilometers(miles): return miles * 1.60934
Create a Python function that takes a string as an input and returns the string with all uppercase characters changed to lowercase characters.	def lowercase_string(s): return s.swapcase()
Write a Python program that takes in a list of numbers and returns a new list containing the numbers in descending order.	def sort_descending(lst): return sorted(lst, reverse=True)
Write a Python function that takes a list of words as input and returns a new list containing the words with more than 5 characters.	def filter_words(lst): return [word for word in lst if len(word) > 5]
Write a Python function that takes a list of floats as input and returns the count of numbers that are greater than the average of the list.	def count_greater_than_average(numbers): average = sum(numbers) / len(numbers) count = sum(1 for num in numbers if num > average) return count
Write a Python function that takes a string as input and returns the string with all consonants converted to uppercase and vowels converted to lowercase.	def convert_case(text): vowels = 'aeiou' result = '' for char in text: if char.lower() in vowels: result += char.lower() else: result += char.upper() return result
Write a Python function that takes a list of integers as input and returns the number of pairs of integers that have a difference of 1.	def count_pairs_with_diff_one(numbers): count = 0 for i in range(len(numbers)): for j in range(i + 1, len(numbers)): if abs(numbers[i] - numbers[j]) == 1: count += 1 return count
Write a Python function that takes a list of lists as input and returns the list that contains the greatest sum of its elements.	def find_list_with_greatest_sum(lists): max_sum = float('-inf') result = None for lst in lists: current_sum = sum(lst) if current_sum > max_sum: max_sum = current_sum result = lst return result
Write a Python function that takes a string as input and returns the longest substring that does not contain any duplicate characters.	def find_longest_substring_without_duplicates(text): char_index_map = {} max_length = 0 max_substring = '' start = 0 for end, char in enumerate(text): if char in char_index_map and char_index_map[char] >= start: start = char_index_map[char] + 1 char_index_map[char] = end if end - start + 1 > max_length: max_length = end - start + 1 max_substring = text[start:end + 1] return max_substring
Write a Python function that takes a list of strings and returns the total number of vowels in the list.	def count_vowels(lst): vowels = 'aeiouAEIOU' count = 0 for word in lst: for char in word: if char in vowels: count += 1 return count
You need to write a Python function that takes a list of integers and returns the second largest number in the list.	def second_largest(lst): lst = set(lst) lst = list(lst) lst.sort() if len(lst) < 2: return None else: return lst[-2]
Write a Python function that takes a string as input and returns the string in uppercase, except for the first character, which should be in lowercase.	def convert_case(s): return s[0].lower() + s[1:].upper()
Write a Python function that takes a list of integers as input and returns the sum of all the prime numbers in the list.	def sum_primes(lst): def is_prime(n): if n < 2: return False for i in range(2, int(n**0.5) + 1): if n % i == 0: return False return True total = 0 for num in lst: if is_prime(num): total += num return total
Write a Python function that takes a list of strings as input and returns a new list that contains only the strings that start with a vowel.	def filter_vowels(lst): vowels = 'aeiouAEIOU' new_lst = [] for word in lst: if word[0] in vowels: new_lst.append(word) return new_lst
Write a Python function that takes a string as input and returns the string with all vowels removed.	def remove_vowels(s): vowels = 'aeiouAEIOU' return ''.join([c for c in s if c not in vowels])
Design a function that prints out the first n prime numbers.	def print_primes(n): def is_prime(num): if num < 2: return False for i in range(2, int(num**0.5) + 1): if num % i == 0: return False return True count = 0 num = 2 while count < n: if is_prime(num): print(num) count += 1 num += 1
Write a Python function that takes a list of integers as input and returns the maximum product of two distinct numbers in the list.	def max_product(nums): if len(nums) < 2: return None max1 = max2 = float('-inf') min1 = min2 = float('inf') for num in nums: if num > max1: max2 = max1 max1 = num elif num > max2: max2 = num if num < min1: min2 = min1 min1 = num elif num < min2: min2 = num return max(max1 * max2, max1 * min1, max2 * min1, max2 * min2)
Write a Python class to represent a simple queue data structure. The class should have methods to add an element, remove an element, and check if the queue is empty.	class Queue: def __init__(self): self.queue = [] def add(self, element): self.queue.append(element) def remove(self): if not self.is_empty(): return self.queue.pop(0) else: return None def is_empty(self): return len(self.queue) == 0
Write a Python function that takes a list of strings as input and returns the longest common prefix among all the strings.	def longest_common_prefix(strs): if not strs: return "" prefix = strs[0] for s in strs: while not s.startswith(prefix): prefix = prefix[:-1] return prefix
Write a function to calculate the average of all the numbers in a list of integers.	def calculate_average(numbers): total = 0 for num in numbers: total += num average = total / len(numbers) return average
Create a function that takes a list of strings and returns the string that appears most frequently in the list.	def most_frequent_string(strings): frequency = {} for string in strings: if string in frequency: frequency[string] += 1 else: frequency[string] = 1 max_frequency = max(frequency.values()) most_frequent = [key for key, value in frequency.items() if value == max_frequency] return most_frequent
Write a Python program to create a class for a Circle with attributes radius and color. The class should have methods to calculate the area and perimeter of the circle.	import math class Circle: def __init__(self, radius, color): self.radius = radius self.color = color def calculate_area(self): area = math.pi * (self.radius ** 2) return area def calculate_perimeter(self): perimeter = 2 * math.pi * self.radius return perimeter
Write a function that takes a list of integers and returns a new list with all the numbers squared.	def square_numbers(numbers): squared_numbers = [] for num in numbers: squared_numbers.append(num ** 2) return squared_numbers
Create a function that accepts a string and returns the count of all the vowels in the string.	def count_vowels(string): vowels = 'aeiou' count = 0 for char in string.lower(): if char in vowels: count += 1 return count
Write a Python function that takes an array of strings as input and returns the longest string in the array.	def longest_string(strings): longest = "" for s in strings: if len(s) > len(longest): longest = s return longest
Write a function that takes an integer n as input and returns a list of all perfect squares less than or equal to n.	def perfect_squares(n): squares = [i**2 for i in range(1, int(n**0.5) + 1) if i**2 <= n] return squares
You are given a string of parentheses. Write a function to determine whether the string is balanced.	def balanced_parentheses(parens): stack = [] for paren in parens: if paren == "(": stack.append(paren) elif paren == ")": if stack: stack.pop() else: return False return not stack
Write a function to count the number of times each element appears in an array.	def element_counts(arr): counts = {} for elem in arr: if elem in counts: counts[elem] += 1 else: counts[elem] = 1 return counts
Write a function that takes a string as input and returns the string with all vowels removed.	def remove_vowels(s): vowels = "aeiouAEIOU" result = "" for char in s: if char not in vowels: result += char return result
Write a function that takes an integer as input and returns the number of digits in the integer.	def count_digits(n): return len(str(abs(n)))
Create a function that can flatten a list of lists into a single list.	def flatten(lst): return [item for sublist in lst for item in sublist]
Design a function that prints out a right-angled triangle with asterisks (*) and empty spaces.	def print_triangle(n): for i in range(1, n + 1): print(' ' * (n - i) + '*' * i)
Write a function that takes a list of strings as input and returns the longest string in the list.	def longest_string(lst): return max(lst, key=len)
Create a function that calculates the sum of all prime numbers in a given list of integers.	def sum_primes(lst): def is_prime(n): if n <= 1: return False if n <= 3: return True if n % 2 == 0 or n % 3 == 0: return False i = 5 while i * i <= n: if n % i == 0 or n % (i + 2) == 0: return False i += 6 return True return sum(num for num in lst if is_prime(num))
Write a function that takes a list of strings as input, and returns the list sorted in descending order based on the length of the strings.	def sort_strings_by_length(lst): return sorted(lst, key=len, reverse=True)
Create a function that takes two lists of integers as input, and returns a new list that contains the elements present in both lists.	def find_common_elements(lst1, lst2): return [element for element in lst1 if element in lst2]
Given a string, write a function that returns the count of words starting with an uppercase letter.	def count_uppercase_words(s): words = s.split() return sum(1 for word in words if word[0].isupper())
Write a function that takes a list of integers as input, and returns True if the list is in ascending order, False otherwise.	def is_ascending(lst): return all(lst[i] <= lst[i+1] for i in range(len(lst)-1))
Create a function that takes a list of integers as input, and returns the count of prime numbers in the list.	def count_primes(lst): def is_prime(n): if n < 2: return False for i in range(2, int(n**0.5) + 1): if n % i == 0: return False return True return sum(1 for num in lst if is_prime(num))
Write a Python function to calculate the nth Fibonacci number, where n is a non-negative integer and the Fibonacci sequence is defined as F(0) = 0, F(1) = 1, and F(n) = F(n-1) + F(n-2) for n > 1.	def fibonacci(n): if n <= 0: return 0 elif n == 1: return 1 else: return fibonacci(n-1) + fibonacci(n-2)
Write a Python function to count the number of vowels in a given string, where vowels are a, e, i, o, u, and their uppercase counterparts.	def count_vowels(s): vowels = 'aeiouAEIOU' return sum(1 for char in s if char in vowels)
Write a Python function to determine whether a given string is a palindrome, which means the string reads the same backward as forward.	def is_palindrome(s): return s == s[::-1]
Write a Python function to find the longest common prefix among a list of strings.	def longest_common_prefix(strs): if not strs: return '' prefix = strs[0] for s in strs[1:]: while not s.startswith(prefix): prefix = prefix[:-1] return prefix
Write a Python function to split a given string into a list of words, assuming words are separated by spaces.	def split_string(s): return s.split()
Create a function that takes an integer as an argument and returns the sum of all even numbers from 2 to the input number.	def sum_even_numbers(n): return sum(range(2, n + 1, 2)) if n >= 2 else 0
Write a function that takes a list of integers as input and returns True if all elements in the list are unique, False otherwise.	def is_list_unique(lst): return len(lst) == len(set(lst))
Create a function that takes a string as an argument and returns the string with all digits removed.	def remove_digits(s): return ''.join(c for c in s if not c.isdigit())
Given a list of integers, write a function that returns the sum of all elements at even indices.	def sum_even_indices(lst): return sum(lst[i] for i in range(0, len(lst), 2))
Write a function that takes two strings as input and returns True if they are anagrams of each other, False otherwise.	def is_anagram(s1, s2): return sorted(s1) == sorted(s2)
Write a Python function to check whether the given string contains at least one uppercase letter.	def has_uppercase(s): for char in s: if char.isupper(): return True return False
Write a Python function that takes a list of strings as input and returns the longest string in the list.	def longest_string(lst): return max(lst, key=len)
Write a Python function to find the sum of the digits of a given integer.	def sum_of_digits(n): return sum(int(digit) for digit in str(n))
Write a Python function to reverse the order of words in a given string.	def reverse_words(s): words = s.split() return ' '.join(reversed(words))
Write a Python function that takes a dictionary as input and returns a new dictionary with keys and values swapped.	def swap_dict_keys_values(d): return {v: k for k, v in d.items()} if all(isinstance(v, (str, int)) for v in d.values()) else None
Write a function called 'find_max_three' that takes a list of three integers as an argument. The function should return the maximum of the three integers.	def find_max_three(lst): return max(lst)
Create a Python class that represents a Book. The class should have attributes for title, author, and number of pages. The class should also have a method to display the book's information.	class Book: def __init__(self, title, author, pages): self.title = title self.author = author self.pages = pages def display_info(self): print(f"Title: {self.title}, Author: {self.author}, Number of pages: {self.pages}")
Write a function called 'count_vowels' that takes a string input as an argument. The function should return the count of vowels in the string.	def count_vowels(s): vowels = 'aeiou' count = 0 for char in s: if char.lower() in vowels: count += 1 return count
Write a function to find the indices of the first and last occurrence of the maximum element in a list of integers. If the maximum element appears only once, the function should return both indices as the same value.	def find_max_indices(lst): max_val = max(lst) first_idx = lst.index(max_val) last_idx = len(lst) - 1 - lst[::-1].index(max_val) return first_idx, last_idx
Create a Python class that represents a Rectangle. The class should have attributes for length and width. The class should also have methods to calculate the area and perimeter of the rectangle.	class Rectangle: def __init__(self, length, width): self.length = length self.width = width def calculate_area(self): return self.length * self.width def calculate_perimeter(self): return 2 * (self.length + self.width)
Write a function that takes a list of integers as input and returns the frequency of each integer in the list.	def freq_count(lst): freq_dict = {} for num in lst: if num in freq_dict: freq_dict[num] += 1 else: freq_dict[num] = 1 return freq_dict
Write a function that takes a string as input and returns the string with all occurrences of a given substring removed.	def remove_substring(s, sub): return s.replace(sub, '')
Write a function that takes a list of tuples, each containing a name and an age, and returns a dictionary with the names as keys and the ages as values.	def name_age_dict(lst): name_age_dict = {} for name, age in lst: name_age_dict[name] = age return name_age_dict
Write a function that takes a list of strings as input and returns a new list that only includes the strings that are palindromes.	def palindrome_strings(lst): return [s for s in lst if s == s[::-1]]
Write a function that takes a string as input and returns the longest word in the string.	def longest_word(s): words = s.split() max_len = max(len(word) for word in words) return [word for word in words if len(word) == max_len][0]
Write a Python function to check if a given list contains duplicate elements or not.	def has_duplicates(lst): return len(lst) != len(set(lst));
Create a Python program that takes a list of strings as input and returns a list of strings that are at least 4 characters long.	def filter_strings(lst): return [s for s in lst if len(s) >= 4];
Write a Python function that takes a string as input and returns the string with all vowels removed.	def remove_vowels(s): vowels = 'aeiouAEIOU' return ''.join([c for c in s if c not in vowels]);
Create a Python program that takes a list of integers as input and returns the count of even numbers in the list.	def count_even(lst): return sum(1 for num in lst if num % 2 == 0);
Write a Python function that takes a list of lists as input and returns the list with the maximum sum of elements.	def max_sum_list(lst_of_lsts): return max(lst_of_lsts, key=sum);
Write a Python function that takes a list of integers as input and returns the sum of all the odd numbers in the list.	def sum_odd_numbers(lst): return sum(i for i in lst if i % 2 != 0)
Write a Python function to determine if a given number is prime.	def is_prime(n): if n <= 1: return False if n == 2: return True if n % 2 == 0: return False max_divisor = int(n**0.5) + 1 for d in range(3, max_divisor, 2): if n % d == 0: return False return True
Create a Python function that takes a string as input and returns the string with all vowels removed.	def remove_vowels(s): vowels = 'aeiouAEIOU' return ''.join([char for char in s if char not in vowels])
Write a Python function to find the maximum number in a given list of integers.	def find_max(lst): return max(lst)
Write a Python function to determine if a given string is a pangram. A pangram is a sentence that uses all the letters at least once.	def is_pangram(s): alphabet = "abcdefghijklmnopqrstuvwxyz" for char in alphabet: if char not in s.lower(): return False return True
Write a Python function that takes a list of strings as input and returns the string with the maximum length.	def longest_string(lst): max_len = 0 longest_str = "" for string in lst: if len(string) > max_len: max_len = len(string) longest_str = string return longest_str
Write a Python function that takes a dictionary as an argument and returns the key with the highest value.	def max_value_key(d): max_value = max(d.values()) for key, value in d.items(): if value == max_value: return key
Write a Python function that takes a list of numbers as an argument and returns True if all numbers are even, False otherwise.	def all_even(lst): for num in lst: if num % 2 != 0: return False return True
Write a Python function that takes a string as an argument and returns the string in reverse order.	def reverse_string(s): return s[::-1]
Write a Python class called "Circle" with attributes "radius" and method "area" that calculates and returns the area of the circle.	import math class Circle: def __init__(self, radius): self.radius = radius def area(self): return math.pi * (self.radius ** 2)
Write a Python function that takes a list of integers as an argument and returns the count of all unique integers in the list.	def count_unique(lst): return len(set(lst))
Write a Python function that takes two lists of integers as arguments and returns a new list that contains all elements from both lists, excluding duplicates.	def merge_lists_unique(lst1, lst2): return list(set(lst1 + lst2))
Write a Python function that takes a list of strings as an argument and returns the count of strings that start with a vowel.	def vowel_strings(lst): vowels = 'aeiouAEIOU' count = 0 for string in lst: if string[0] in vowels: count += 1 return count
Write a Python function that takes an integer as an argument and returns the factorial of the number.	def factorial(n): if n == 0: return 1 else: return n * factorial(n-1)
Write a Python class called "Student" with attributes "name", "age", and "grade" and a method "print_info" that prints the student's information.	class Student: def __init__(self, name, age, grade): self.name = name self.age = age self.grade = grade def print_info(self): print(f"Name: {self.name}, Age: {self.age}, Grade: {self.grade}")
Write a Python function that takes a list of strings as input and returns the string with the most vowels.	def most_vowels(lst): vowels = 'aeiou' max_vowels = 0 result = '' for word in lst: count = sum(1 for char in word.lower() if char in vowels) if count > max_vowels: max_vowels = count result = word return result
Create a Python function that accepts a string as input and returns the string with all characters shifted three positions forward in the alphabet.	def shift_chars(s): result = '' for char in s: if char.isalpha(): ascii_offset = 65 if char.isupper() else 97 result += chr((ord(char) - ascii_offset + 3) % 26 + ascii_offset) else: result += char return result
Write a Python function that takes a list of integers as input and returns the count of pairs with a sum equal to 10.	def count_pairs(lst): count = 0 for i in range(len(lst)): for j in range(i+1, len(lst)): if lst[i] + lst[j] == 10: count += 1 return count
Design a Python function that accepts a string as input and returns the string with all occurrences of 'a' replaced with '*', and all occurrences of 'b' replaced with '+'.	def replace_chars(s): return s.replace('a', '*').replace('b', '+')
Write a Python function that takes a list of integers as input and returns the list sorted in descending order.	def sort_desc(lst): return sorted(lst, reverse=True)
Write a Python function that takes a list of integers as input and returns a new list containing only the even numbers from the original list.	def even_numbers(lst): return [num for num in lst if num % 2 == 0]
You are given a string where some characters are repeated consecutively. Write a Python function `compress_string` that takes this string as an input and returns a compressed version of the string where each character is followed by its frequency.	def compress_string(s): if not s: return "" compressed = "" count = 1 for i in range(1, len(s)): if s[i] == s[i - 1]: count += 1 else: compressed += s[i - 1] + str(count) count = 1 compressed += s[-1] + str(count) return compressed
Implement a Python function `find_max_value` that takes a dictionary where the keys are names of students and the values are their corresponding scores as input and returns the name of the student with the highest score.	def find_max_value(d): return max(d, key=d.get)
Write a Python program that takes a list of strings as input and returns a new list containing the reversed strings.	def reverse_strings(lst): return [s[::-1] for s in lst]
You are given a list of integers representing the scores of students in a class. Write a Python function `calculate_grade` that takes this list as input and returns a new list where each score is replaced by its corresponding grade according to the following criteria: scores 90-100 are 'A', scores 80-89 are 'B', scores 70-79 are 'C', scores 60-69 are 'D', and scores below 60 are 'F'.	def calculate_grade(lst): grades = [] for score in lst: if score >= 90: grades.append('A') elif score >= 80: grades.append('B') elif score >= 70: grades.append('C') elif score >= 60: grades.append('D') else: grades.append('F') return grades
Write a Python function that takes a string as input and returns a new string where vowels are replaced with a corresponding uppercase letter.	def replace_vowels_with_uppercase(s): vowels = 'aeiou' new_s = "" for char in s: if char in vowels: new_s += char.upper() else: new_s += char return new_s
Implement a function that takes a list of integers as input and returns a new list containing the numbers in descending order.	def sort_descending(lst): return sorted(lst, reverse=True)
Given a string, write a Python function to check if it is a palindrome.	def is_palindrome(s): return s == s[::-1]
Write a Python function that takes a dictionary as input and returns a new dictionary where the keys and values are swapped.	def swap_key_value(d): return dict([(v, k) for k, v in d.items()])
Develop a Python function that takes a list of lists as input and returns a new list containing the flattened elements.	def flatten_list(lst): return [item for sublist in lst for item in sublist]
Implement a function to remove all duplicates from a list while preserving the original order of elements.	def remove_duplicates(input_list): seen = set() output_list = [] for item in input_list: if item not in seen: output_list.append(item) seen.add(item) return output_list
Write a Python function to find the longest consecutive sequence of numbers in a list.	def longest_consecutive_sequence(input_list): num_set = set(input_list) longest_sequence = 0 for num in num_set: if num - 1 not in num_set: # Check if current num is the start of a sequence current_num, current_sequence = num, 1 while current_num + 1 in num_set: current_num, current_sequence = current_num + 1, current_sequence + 1 longest_sequence = max(longest_sequence, current_sequence) return …
Write a Python function to count the number of times each element appears in a 2D list and return a dictionary with the counts.	def count_2d_list_elements(input_list): element_counts = {} for sublist in input_list: for element in sublist: if element in element_counts: element_counts[element] += 1 else: element_counts[element] = 1 return element_counts
Write a function to find the maximum product of three numbers in a list.	def max_product_of_three(input_list): input_list.sort() return max(input_list[0] * input_list[1] * input_list[-1], input_list[-1] * input_list[-2] * input_list[-3])
You are given a list of strings. Write a function to find the longest common prefix among all strings.	def longest_common_prefix(input_list): prefix = "" for chars in zip(*input_list): if len(set(chars)) == 1: prefix += chars[0] else: break return prefix
Write a Python function that takes a list of strings as an input and returns the longest string in the list.	def longest_string(lst): return max(lst, key=len)
Write a function that calculates the area of a triangle given the length of its base and height.	def triangle_area(base, height): return 0.5 * base * height
Create a Python function that checks if a given number is a perfect square.	import math def is_perfect_square(n): sqrt = math.sqrt(n) return sqrt == int(sqrt)
Write a Python function that takes a list of integers as input and returns a new list containing only the even numbers from the original list.	def get_even_numbers(lst): return [num for num in lst if num % 2 == 0]
Write a Python function that takes a string as an input and returns the string with all vowels removed.	def remove_vowels(s): vowels = 'aeiouAEIOU' return ''.join([char for char in s if char not in vowels])
Design a Python function that takes a list of strings as input and returns the string that appears most frequently in the list.	def most_frequent_string(lst): freq_dict = {} for string in lst: if string in freq_dict: freq_dict[string] += 1 else: freq_dict[string] = 1 most_freq_str = max(freq_dict, key=freq_dict.get) return most_freq_str
Write a function that takes an integer as input and returns its square root if the number is perfect square, otherwise returns None.	import math def perfect_square_root(n): root = math.sqrt(n) if int(root + 0.5) ** 2 == n: return root else: return None
Develop a Python function that takes a string as input and returns True if all characters in the string are alphanumeric, and False otherwise.	def is_alphanumeric(s): return s.isalnum()
Write a function that takes a list of lists as input and returns a new list where each sublist is sorted in ascending order.	def sort_sublists(lst): return [sorted(sublist) for sublist in lst]
Design a Python function that takes an integer as input and returns the sum of its digits.	def sum_digits(n): return sum(int(digit) for digit in str(n))
Write a function that takes a list of strings as input and returns the count of strings that end with the character 't'.	def count_strings_ending_with_t(lst): count = 0 for string in lst: if string.endswith('t'): count += 1 return count
Define a function that takes a list of integers as input and returns a new list containing only the numbers that are greater than 3.	def filter_numbers_greater_than_3(lst): return [num for num in lst if num > 3]
Write a function that takes two lists as input and returns a set of elements that are present in both lists.	def intersection_of_lists(lst1, lst2): return set(lst1) & set(lst2)
Implement a function that takes a string as input and returns a dictionary where the keys are the characters in the string and the values are their corresponding frequencies.	def character_frequency_dict(s): freq_dict = {} for char in s: if char in freq_dict: freq_dict[char] += 1 else: freq_dict[char] = 1 return freq_dict
Write a function that takes a list of dictionaries as input, where each dictionary represents a person with keys 'name' and 'age', and returns a new list sorted by age in ascending order.	def sort_people_by_age(people): return sorted(people, key=lambda x: x['age'])
Create a Python function that takes a list of integers as input and returns the sum of all even numbers in the list.	def sum_even_numbers(lst): even_nums = [num for num in lst if num % 2 == 0] return sum(even_nums)
Write a Python function that takes a list of strings as input and returns the list with all strings in lowercase.	def to_lowercase(lst): return [s.lower() for s in lst]
Write a function that takes in a list of integers and returns the number of elements greater than the average of the list.	def count AboveAverage(lst): avg = sum(lst) / len(lst) return sum(1 for num in lst if num > avg)
Write a Python function that takes a sentence as input and returns the sentence with all vowels removed.	def remove_vowels(sentence): vowels = 'aeiouAEIOU' return ''.join([char for char in sentence if char not in vowels])
Create a Python function that takes a list of integers as input and returns the sublist with the maximum sum.	def max_sublist_sum(lst): max_sum = float('-inf') max_sublist = [] for i in range(len(lst)): for j in range(i, len(lst)): sublist = lst[i:j+1] sublist_sum = sum(sublist) if sublist_sum > max_sum: max_sum = sublist_sum max_sublist = sublist return max_sublist
Write a function that takes a string as input and returns the string with all vowels removed.	def remove_vowels(s): vowels = 'aeiouAEIOU' return ''.join([ch for ch in s if ch not in vowels])
Create a function that takes a list of integers as input and returns the average of all the prime numbers in the list.	def average_primes(lst): def is_prime(n): if n < 2: return False for i in range(2, int(n**0.5) + 1): if n % i == 0: return False return True primes = [num for num in lst if is_prime(num)] return sum(primes) / len(primes) if primes else None
Write a function that takes a list of strings as input and returns a new list containing all the strings that have a length of at least 5 characters.	def filter_long_strings(lst): return [s for s in lst if len(s) >= 5]
Create a function that takes a list of integers as input and returns the second largest number in the list.	def second_largest(lst): if len(lst) < 2: return None lst = list(set(lst)) # remove duplicates lst.sort() return lst[-2]
Write a function that takes a string as input and returns the string with all uppercase characters converted to lowercase and all lowercase characters converted to uppercase.	def swap_case(s): return s.swapcase()
Write a function that takes a string as input and returns the count of vowels in the string.	def count_vowels(s): count = 0 for char in s: if char.lower() in 'aeiou': count += 1 return count
Write a function that takes a list of strings as input and returns a list of strings in uppercase.	def convert_to_uppercase(list_of_strings): return [s.upper() for s in list_of_strings]
Write a function that takes a list of integers as input and returns the sum of the squares of the numbers in the list.	def sum_of_squares(numbers): return sum(num**2 for num in numbers)
Write a function that takes a list of lists as input and returns a flattened list.	def flatten(list_of_lists): return [item for sublist in list_of_lists for item in sublist]
Write a function that takes a string as input and returns the string with all occurrences of a specified character removed.	def remove_char(s, char): return s.replace(char, '')
Create a function to count the number of even and odd numbers in a given list of integers.	def count_even_odd(numbers): even_count = 0 odd_count = 0 for num in numbers: if num % 2 == 0: even_count += 1 else: odd_count += 1 return even_count, odd_count
Implement a Python program that takes a string as input and returns the string with all vowels removed.	def remove_vowels(s): vowels = 'aeiouAEIOU' return ''.join([char for char in s if char not in vowels])
Write a Python function that takes a list of strings as input and returns the string with the maximum length.	def find_longest_string(strings): return max(strings, key=len)
Create a function to calculate the area and perimeter of a rectangle given its length and width.	def calculate_rectangle_properties(length, width): area = length * width perimeter = 2 * (length + width) return area, perimeter
Write a Python function that takes a list of integers as input and returns a new list containing only the prime numbers.	def filter_prime_numbers(numbers): def is_prime(n): if n <= 1: return False if n == 2: return True if n % 2 == 0: return False i = 3 while i * i <= n: if n % i == 0: return False i += 2 return True return [num for num in numbers if is_prime(num)]
Write a function to calculate the sum of digits of a given integer.	def sum_of_digits(n): sum = 0 while n: sum += n % 10 n //= 10 return sum
Write a function to count the frequency of a specified character in a given string.	def char_frequency(s, char): count = 0 for c in s: if c == char: count += 1 return count
Create a function that takes a list of strings as input and returns the longest string in the list.	def longest_string(lst): return max(lst, key=len)
Develop a Python function to find the lowest common multiple (LCM) of two integers.	import math def lcm(a, b): return (a*b) // math.gcd(a, b)
Write a function to count the number of vowels in a given string.	def count_vowels(s): count = 0 for c in s: if c.lower() in 'aeiou': count += 1 return count
Implement a Python function to reverse a given string without using the built-in reverse function or slicing.	def reverse_string(s): rev_str = "" for i in range(len(s)-1, -1, -1): rev_str += s[i] return rev_str
Write a Python function that takes a list of integers as input and returns the count of odd numbers in the list.	def count_odd_numbers(lst): count = 0 for num in lst: if num % 2 != 0: count += 1 return count
You are given a string containing multiple sentences. Write a Python program to count the number of sentences in the string.	def count_sentences(s): sentences = s.split(".") return len(sentences)
Implement a Python function that accepts a list of numbers and returns the second largest number in the list.	def second_largest(lst): if len(lst) < 2: return None max_num = second_max_num = float('-inf') for num in lst: if num > max_num: second_max_num = max_num max_num = num elif num > second_max_num and num < max_num: second_max_num = num return second_max_num
You are given a list of strings. Write a Python program to find the longest string in the list and return its length.	def longest_string_length(lst): max_length = 0 for string in lst: if len(string) > max_length: max_length = len(string) return max_length
Write a Python function that takes in a list of strings and returns a list of strings where all strings are in uppercase.	def uppercase_strings(string_list): return [s.upper() for s in string_list]
Write a function that takes in a list of integers and returns the largest number in the list.	def largest_number(lst): return max(lst)
Write a Python function that takes in a string and returns the number of vowels in the string.	def count_vowels(s): vowels = 'aeiou' return sum(1 for char in s.lower() if char in vowels)
Write a function that takes in a list of integers and returns a new list containing only the positive numbers from the original list.	def get_positive_numbers(lst): return [num for num in lst if num > 0]
Write a Python function that takes in a string and returns the string with all occurrences of a specified character removed.	def remove_char(s, char): return s.replace(char, '')
Write a Python function that takes a string as input and returns the number of vowels in the string.	def count_vowels(s): vowels = "aeiou" count = 0 for char in s: if char.lower() in vowels: count += 1 return count
Write a Python function that takes a list of integers as input and returns the sum of all the even numbers in the list.	def sum_even_numbers(nums): return sum(num for num in nums if num % 2 == 0)
Write a Python function that takes a string as input and returns True if the string is in uppercase, False otherwise.	def is_uppercase(s): return s.isupper()
Write a Python function that takes a list of strings as input and returns the longest string in the list.	def longest_string(string_list): return max(string_list, key=len)
Write a Python function that takes a list of integers as input and returns the frequency of each number in the list.	def frequency_count(nums): freq = {} for num in nums: if num in freq: freq[num] += 1 else: freq[num] = 1 return freq
Design a Python function that takes a list of strings as input and returns a new list with all strings in uppercase.	def uppercase_strings(lst): return [s.upper() for s in lst]
Write a Python function that takes a dictionary as input where the keys are strings and the values are lists of strings, and returns a new dictionary where the keys are the same, but the values are sets of strings.	def convert_to_sets(d): return {k: set(v) for k, v in d.items()}
Develop a Python function to calculate the median value of a list of numbers.	def calculate_median(lst): lst.sort() n = len(lst) if n % 2 == 0: return (lst[n//2 - 1] + lst[n//2]) / 2 else: return lst[n//2]
Create a Python function that takes a list of tuples as input, where each tuple contains a string and an integer, and returns a new list of tuples with the strings in sorted order.	def sort_tuples(tuples): return sorted(tuples, key=lambda x: x[0])
You are given a list of strings and you need to write a Python function that returns the longest string in the list.	def longest_string(lst): return max(lst, key=len)
Write a Python function that takes two lists as input and merges them into a single list, maintaining the order of elements from both lists.	def merge_lists(list1, list2): return list1 + list2
Write a Python function that takes a list of integers as input and returns a new list containing only the positive integers.	def filter_positive_numbers(numbers): return [num for num in numbers if num > 0]
Write a Python function that takes a list of strings as input and returns a new list containing only the strings that start with an uppercase letter.	def filter_uppercase_strings(strings): return [s for s in strings if s and s[0].isupper()]
Given a list of integers, write a function to find the maximum and minimum values in the list.	def find_max_min(numbers): return max(numbers), min(numbers)
Create a function that takes a string as input and returns the string with all lowercase characters converted to uppercase.	def convert_to_uppercase(s): return s.upper()
Write a Python function that takes a list of tuples as input and returns a new list containing only the tuples with a length of 3.	def filter_tuples(tuples): return [t for t in tuples if len(t) == 3]
Given a dictionary, write a function to find the key with the maximum value.	def find_key_with_max_value(d): return max(d, key=d.get)
Write a program that takes a list of integers as input and returns the list with all duplicates removed and the elements sorted in ascending order.	def sort_and_remove_duplicates(lst): return sorted(set(lst))
Implement a Python function to count the frequency of each digit in a given number.	def digit_frequency(n): freq = {str(i): 0 for i in range(10)} for digit in str(n): freq[digit] += 1 return freq
Write a Python function to check if a given year is a leap year.	def is_leap_year(year): if year % 4 != 0: return False elif year % 100 != 0: return True elif year % 400 != 0: return False else: return True
Implement a Python function to find the maximum sum of a contiguous subarray within a one-dimensional array of numbers.	def max_subarray_sum(arr): max_sum = float('-inf') current_sum = 0 for num in arr: current_sum = max(num, current_sum + num) max_sum = max(max_sum, current_sum) return max_sum
Write a Python function to convert an infix expression to postfix notation.	def infix_to_postfix(infix_expr): precedence = {'+': 1, '-': 1, '*': 2, '/': 2} postfix_expr = [] stack = [] for char in infix_expr: if char.isalnum(): postfix_expr.append(char) elif char == '(': stack.append(char) elif char == ')': while stack and stack[-1] != '(': postfix_expr.append(stack.pop()) stack.pop() else: while stack and stack[-1] != '(' and precedence[char] <= precedence[stack[-1]]: p…
Write a function that takes a list of strings as input and returns a set of all unique strings in the list.	def unique_strings(lst): unique_set = set(lst) return unique_set
Create a program that takes a list of numbers as input and returns the second largest number in the list.	def second_largest(lst): if len(lst) < 2: return None lst.sort() return lst[-2]
Write a function that takes a list of lists as input and returns a new list containing all the elements from the inner lists.	def flatten_list(lst): flat_list = [item for sublist in lst for item in sublist] return flat_list
Given a list of integers, write a function to find the count of all prime numbers in the list.	def count_primes(lst): def is_prime(n): if n < 2: return False for i in range(2, int(n**0.5) + 1): if n % i == 0: return False return True count = 0 for num in lst: if is_prime(num): count += 1 return count
Write a function that takes a string as input and returns the string in uppercase.	def to_uppercase(s): return s.upper()
Write a Python program that takes a list of strings as input and returns the list of strings in reverse order.	def reverse_string_list(input_list): return input_list[::-1]
Write a Python function that takes an integer as input and returns the sum of all squares of numbers up to the input number.	def sum_of_squares(n): return sum(i**2 for i in range(1, n+1))
Write a Python function that takes a string as input and returns the frequency of each character in the string.	def char_frequency(input_string): return {char: input_string.count(char) for char in set(input_string)}
Write a Python program that takes a list of lists as input and returns a flattened list.	def flatten_list(input_list): return [item for sublist in input_list for item in sublist]
Write a Python function that takes a dictionary as input and returns a new dictionary with the keys and values swapped.	def swap_dict(input_dict): return {v: k for k, v in input_dict.items()}
Write a Python program that takes a list of tuples as input and sorts them based on the second element of each tuple in ascending order.	def sort_tuples_by_second_element(input_list): return sorted(input_list, key=lambda x: x[1])
Write a Python function that takes a string as input and returns the string with all vowels removed.	def remove_vowels(input_string): return ''.join([char for char in input_string if char.lower() not in 'aeiou'])
Write a Python program that takes two lists of integers as input and returns their intersection.	def intersection_of_lists(list1, list2): return [element for element in list1 if element in list2]
Write a Python function that takes a list of integers as input and returns the list with all duplicates removed.	def remove_duplicates(input_list): return list(set(input_list))
Write a Python program that takes a string as input and returns the string with all occurrences of a specified substring removed.	def remove_substring(input_string, sub_string): return input_string.replace(sub_string, '')
Create a function that accepts a list of integers and returns the list with all duplicates removed.	def remove_duplicates(nums): return list(set(nums))
Create a function that takes a string `s` as input and returns `True` if `s` is a palindrome and `False` otherwise.	def is_palindrome(s): return s == s[::-1]
Create a function that takes a list of strings as input and returns the length of the longest string in the list.	def longest_string_length(strings): return max(len(s) for s in strings)
Create a function that accepts two strings `s1` and `s2` as input and returns a new string that contains characters from `s1` that are not in `s2`.	def string_difference(s1, s2): return ''.join([c for c in s1 if c not in s2])
Create a function that takes a list of integers as input and returns the number of pairs of adjacent elements that have the same value.	def count_adjacent_pairs(nums): return sum(1 for i in range(len(nums) - 1) if nums[i] == nums[i + 1])
Write a function to count the frequency of each element in a given list.	def count_frequency(lst): freq = {} for element in lst: if element in freq: freq[element] += 1 else: freq[element] = 1 return freq
Write a function that takes a list of integers as input and returns the list of squares of each element.	def squares(lst): return [element ** 2 for element in lst]
Design a function that prints out the first n lines of Pascal's Triangle.	def pascal_triangle(n): for line in range(n): c = 1 for i in range(line + 1): print(c, end=" ") c = c * (line - i) // (i + 1) print()
Write a function that takes a string as input and returns the string with all vowels removed.	def remove_vowels(s): vowels = 'aeiouAEIOU' return ''.join([char for char in s if char not in vowels])
Write a class called "Circle" with attributes "radius" and methods "area" and "circumference".	import math class Circle: def __init__(self, radius): self.radius = radius def area(self): return math.pi * (self.radius ** 2) def circumference(self): return 2 * math.pi * self.radius
Write a Python function that takes an integer as input and returns the sum of its digits.	def sum_of_digits(n): total = 0 while n: total += n % 10 n //= 10 return total
Write a Python program that takes a string as input and returns the string with the vowels removed.	def remove_vowels(s): vowels = 'aeiouAEIOU' return ''.join([c for c in s if c not in vowels])
Write a Python function that takes a list of integers as input and returns a new list with the elements in sorted order, without using the built-in sort function or the sorted function.	def bubble_sort(lst): n = len(lst) for i in range(n): for j in range(0, n - i - 1): if lst[j] > lst[j + 1] : lst[j], lst[j + 1] = lst[j + 1], lst[j] return lst
Write a Python function that takes a list of integers as input and returns the second largest number in the list.	def second_largest(lst): lst = list(set(lst)) # Remove duplicates lst.sort() return lst[-2]
Write a Python function that takes a string as input and returns the string with all occurrences of a given substring replaced with another substring.	def replace_substring(s, old, new): return s.replace(old, new)
Create a Python function that takes a list of integers as input and returns the product of all the numbers in the list.	def product_of_list(numbers): product = 1 for num in numbers: product *= num return product
Write a function that takes a string as input and returns True if the string starts with a vowel, False otherwise. Consider both uppercase and lowercase vowels.	def starts_with_vowel(s): vowels = 'aeiouAEIOU' if len(s) == 0: return False elif s[0] in vowels: return True else: return False
Create a Python function that takes a list of strings as input and returns a new list that contains only the strings that have a length greater than 5.	def filter_long_strings(string_list): long_strings = [] for s in string_list: if len(s) > 5: long_strings.append(s) return long_strings
Write a function that takes a list of integers as input and returns a new list that contains the integers in descending order.	def sort_descending(numbers): return sorted(numbers, reverse=True)
Create a Python function that takes a string as input and returns the string with all digits removed.	def remove_digits(s): return ''.join(c for c in s if not c.isdigit())
Write a function that takes a string as input and returns the string without vowels.	def remove_vowels(s): vowels = 'aeiouAEIOU' return ''.join([c for c in s if c not in vowels])
Write a function that finds the maximum value in a list of integers.	def find_max(lst): return max(lst)
Write a function that takes a list of strings as input and returns the longest string in the list.	def longest_string(lst): return max(lst, key=len)
Write a function that takes a dictionary as input and returns a new dictionary with keys and values swapped.	def swap_dict(d): return {v: k for k, v in d.items()}
Write a function that takes a list of integers as input and returns the count of even numbers in the list.	def count_evens(lst): return sum(1 for num in lst if num % 2 == 0)
Write a function that takes a string as input and returns the string with all vowels removed.	``` def remove_vowels(s): vowels = 'aeiouAEIOU' return ''.join([char for char in s if char not in vowels]) ```
You are given a dictionary where keys are names and values are ages of students. Write a function that returns the name of the oldest student.	``` def oldest_student(d): return max(d, key=d.get) ```
Given a string `s` and an integer `n`, write a function that returns the string `s` repeated `n` times.	``` def repeat_string(s, n): return s * n ```
Write a function that takes a list of integers as input and returns the sum of all even numbers in the list.	``` def sum_even_numbers(lst): return sum(num for num in lst if num % 2 == 0) ```
You are given a list of strings. Write a function that returns the longest string in the list.	``` def longest_string(lst): return max(lst, key=len) ```
You are given a list of strings and you need to write a Python function that returns the longest string in the list. If the list is empty, the function should return an empty string.	def longest_string(lst): if not lst: return "" return max(lst, key=len)
Write a function that takes a string as an argument and returns the string with all lowercase characters changed to uppercase and all uppercase characters changed to lowercase.	def swap_case(s): return s.swapcase()
Write a function that takes two lists of integers as input and returns the union of the two lists. The union of two lists is a list that contains all unique elements from both lists.	def union(lst1, lst2): return list(set(lst1 + lst2))
Write a function that takes a list of integers as input and returns the list with all duplicates removed.	def remove_duplicates(lst): return list(set(lst))
You are given a dictionary where keys are student names and values are their corresponding grades. You need to write a Python function that returns a dictionary with student names as keys and their grades multiplied by 2 as values.	def double_grades(grades): return {name: grade * 2 for name, grade in grades.items()}
Write a Python function that checks if a given list is a palindrome.	def is_palindrome(lst): return lst == lst[::-1]
Develop a Python function to calculate the average of a given list of numbers.	def calculate_average(numbers): return sum(numbers) / len(numbers)
Create a Python function to convert a given string from lowercase to uppercase.	def to_uppercase(s): return s.upper()
Write a Python function that takes a list of words as input and returns the longest word.	def longest_word(words): return max(words, key=len)
Develop a Python function to count the number of vowels in a given string.	def count_vowels(s): count = 0 for char in s: if char.lower() in 'aeiou': count += 1 return count
Write a function that takes a list of strings as input, and returns the total number of vowels in all the strings.	def count_vowels(lst): vowels = 'aeiouAEIOU' count = 0 for string in lst: for char in string: if char in vowels: count += 1 return count
Write a function that takes a list of integers as input, and returns the sum of all even numbers in the list.	def sum_even(lst): return sum(num for num in lst if num % 2 == 0)
Write a function that takes a string as input, and returns the string in uppercase if the string contains any lowercase letters, otherwise returns the string in lowercase.	def change_case(s): if any(c.islower() for c in s): return s.upper() else: return s.lower()
Write a function that takes a list of integers as input, and returns the count of unique elements in the list.	def count_unique(lst): return len(set(lst))
Write a function that takes a string as input, and returns True if the string starts with an uppercase letter, False otherwise.	def starts_uppercase(s): return s and s[0].isupper()
Create a function that takes a string and returns a new string with all vowels removed.	def remove_vowels(s): vowels = 'aeiouAEIOU' return ''.join([char for char in s if char not in vowels])
Write a function to find the number of occurrences of a given substring within a string.	def count_substring(s, sub): return s.count(sub)
Implement a function that takes a list of strings and returns the longest string.	def longest_string(lst): return max(lst, key=len)
Create a function that takes a list of integers and returns the count of positive numbers.	def count_positive(lst): return len([num for num in lst if num > 0])
Write a function to find the average of a list of numbers.	def average(lst): return sum(lst) / len(lst)
Write a function called count_vowels that takes a string as input and returns the total count of vowels in the string.	def count_vowels(s): vowels = 'aeiou' return sum(1 for char in s.lower() if char in vowels)
Write a function to calculate the area of a triangle given its three sides a, b, and c.	import math def calculate_triangle_area(a, b, c): s = (a + b + c) / 2 return math.sqrt(s * (s - a) * (s - b) * (s - c))
Write a function called find_common_elements that takes two lists as input and returns a new list containing the common elements between the two lists.	def find_common_elements(list1, list2): return [element for element in list1 if element in list2]
Write a function called check_palindrome that takes a string as input and returns True if the string is a palindrome, False otherwise.	def check_palindrome(s): return s == s[::-1]
Write a function called calculate_average that takes a list of numbers as input and returns the average value of the list.	def calculate_average(numbers): return sum(numbers) / len(numbers)
You are given a list of strings and you need to write a Python function that returns the string that appears most frequently in the list. If there's a tie, return all strings that have the maximum frequency.	def most_frequent_string(lst): freq_dict = {} for string in lst: if string in freq_dict: freq_dict[string] += 1 else: freq_dict[string] = 1 max_freq = max(freq_dict.values()) most_frequent_strings = [string for string, freq in freq_dict.items() if freq == max_freq] return most_frequent_strings
Write a Python function that takes a list of integers as input and returns the count of numbers that are divisible by 3 but not by 5.	def count_special_numbers(lst): count = 0 for num in lst: if num % 3 == 0 and num % 5 != 0: count += 1 return count
Create a Python function that takes a list of real numbers as input and returns the average of the first and last numbers in the list. If the list is empty, the function should return None.	def avg_first_last(lst): if not lst: return None return (lst[0] + lst[-1]) / 2
You are given a string and you need to write a Python function that returns the string with all consonants changed to asterisks (*). Vowels and non-alphabet characters should remain unchanged.	def replace_consonants(s): vowels = 'aeiou' for char in s: if char.lower() not in vowels and char.isalpha(): s = s.replace(char, '*') return s
Write a Python function that takes a list of lists as input, where each sublist represents a rectangle with its width and height. The function should return the total area of all the rectangles.	def total_area(rectangles): total = 0 for rectangle in rectangles: total += rectangle[0] * rectangle[1] return total
Write a function that takes a list of integers as input and returns the count of all prime numbers in the list.	def count_primes(lst): def is_prime(n): if n < 2: return False for i in range(2, int(n**0.5) + 1): if n % i == 0: return False return True return len([num for num in lst if is_prime(num)])
Write a function that takes a list of strings as input and returns the longest string in the list.	def longest_string(lst): return max(lst, key=len)
Write a function that takes a list of numbers as input and returns the product of all the numbers in the list.	import math def product(lst): return math.prod(lst)
Write a function that takes a list of integers as input and returns the count of all numbers in the list that are greater than their successors.	def count_greater(lst): return len([i for i in range(len(lst) - 1) if lst[i] > lst[i + 1]])
Write a function that takes a string as input and returns the count of all vowels in the string.	def count_vowels(s): return len([c for c in s if c.lower() in 'aeiou'])
Write a Python function that takes a list of strings and returns a new list with all strings in uppercase.	def convert_to_uppercase(strings): return [s.upper() for s in strings]
Design a Python function that accepts a list of integers and returns the count of prime numbers in the list.	import math def count_prime_numbers(numbers): def is_prime(n): if n < 2: return False for i in range(2, int(math.sqrt(n)) + 1): if n % i == 0: return False return True return sum(1 for n in numbers if is_prime(n))
Write a Python function that takes a string as input and returns the reversed string.	def reverse_string(s): return s[::-1]
Create a Python function that accepts a list of integers and returns a new list with all numbers greater than the average of the numbers.	def numbers_greater_than_average(numbers): average = sum(numbers) / len(numbers) return [n for n in numbers if n > average]
Write a Python function that takes two lists of integers as input and returns the intersection of the two lists.	def intersection_of_lists(list1, list2): return [n for n in list1 if n in list2]
Write a Python function to reverse the order of the words in a given string. For example, if the input string is "hello world Python", the output should be "Python world hello".	def reverse_words_order(s): words = s.split() reversed_words = ' '.join(reversed(words)) return reversed_words
Given a list of integers, write a Python function to find the minimum number of operations required to make all elements in the list equal, where an operation is defined as incrementing or decrementing an element by 1.	def min_operations_to_equalize(arr): arr.sort() median = arr[len(arr) // 2] operations = sum(abs(x - median) for x in arr) return operations
Write a Python function to check if a given string is a palindrome, which means it reads the same backward as forward. For example, "madam" is a palindrome.	def is_palindrome(s): return s == s[::-1]
Given a list of integers, write a Python function to find the maximum product of a subsequence of the list, where the subsequence can have any length.	def max_product_subsequence(arr): max_prod = arr[0] min_prod = arr[0] result = arr[0] for i in range(1, len(arr)): if arr[i] < 0: max_prod, min_prod = min_prod, max_prod max_prod = max(arr[i], max_prod * arr[i]) min_prod = min(arr[i], min_prod * arr[i]) result = max(result, max_prod) return result
Write a Python function to count the number of ways to climb n stairs, where you can either climb 1 or 2 stairs at a time.	def count_ways_to_climb(n): if n <= 2: return n ways = [0] * (n + 1) ways[1] = 1 ways[2] = 2 for i in range(3, n + 1): ways[i] = ways[i - 1] + ways[i - 2] return ways[n]
Write a function that takes a list of strings as input and returns a list of strings with all vowels removed.	def remove_vowels(lst): vowels = 'aeiouAEIOU' return [''.join([char for char in s if char not in vowels]) for s in lst]
Write a function that takes an integer as an input and returns the number of digits in the integer.	def count_digits(n): return len(str(n))
Create a function called `common_characters` that takes two strings as input and returns a list of characters that are common to both strings.	def common_characters(s1, s2): return [char for char in s1 if char in s2]
Write a function that takes a list of integers as input and returns the largest number in the list.	def largest_number(lst): return max(lst)
Write a function that takes a string as an input and returns a string where the first and last characters are swapped.	def swap_characters(s): if len(s) > 1: return s[-1] + s[1:-1] + s[0] else: return s
Create a function to count the number of vowels in a given string.	def count_vowels(s): vowels = 'aeiou' count = 0 for char in s: if char.lower() in vowels: count += 1 return count
Write a function to check if a given list of integers is sorted in ascending order.	def is_sorted(lst): return all(lst[i] <= lst[i+1] for i in range(len(lst)-1))
Develop a function to calculate the sum of all digits in a given integer.	def sum_of_digits(n): return sum(int(digit) for digit in str(n))
Create a function to find the first duplicate in a given list of integers.	def first_duplicate(lst): seen = set() for num in lst: if num in seen: return num seen.add(num) return None
Write a function to convert all characters in a given string to uppercase.	def to_uppercase(s): return s.upper()
Write a Python function that takes a list of integers as input and returns the second largest number in the list.	``` def second_largest(lst): if len(lst) < 2: return None lst = list(set(lst)) # remove duplicates lst.sort() return lst[-2] ```
Write a Python function to check if a list of strings is sorted in ascending order, ignoring the case.	``` def is_sorted(lst): return lst == sorted(lst, key=str.casefold) ```
Write a Python program to calculate the average grade of a list of students, given a dictionary where the keys are the student names and the values are their grades.	``` def average_grade(grades): return sum(grades.values()) / len(grades) ```
Write a Python function to remove duplicates from a list while preserving the original order.	``` def remove_duplicates(lst): seen = set() return [x for x in lst if not (x in seen or seen.add(x))] ```
Write a Python program to find the first duplicate in a list of integers.	``` def first_duplicate(lst): seen = set() for num in lst: if num in seen: return num seen.add(num) return None ```
Write a Python function that takes a string and returns the count of each vowel in the string.	def count_vowels(s): vowels = 'aeiou' vowel_count = {} for char in s.lower(): if char in vowels: if char in vowel_count: vowel_count[char] += 1 else: vowel_count[char] = 1 return vowel_count
Write a Python function that takes a list of integers as input and returns the second largest number in the list.	def second_largest(lst): largest = second_largest = float('-inf') for num in lst: if num > largest: second_largest = largest largest = num elif num > second_largest and num != largest: second_largest = num return second_largest if second_largest != float('-inf') else None
Write a Python function that takes a string as input and returns the string with all the vowels removed.	def remove_vowels(s): vowels = 'aeiouAEIOU' return ''.join(char for char in s if char not in vowels)
Write a Python function that takes a list of strings as input and returns a new list with all strings in uppercase.	def to_uppercase(lst): return [s.upper() for s in lst]
Write a Python function that takes a string as input and returns True if the string contains at least one digit, and False otherwise.	def has_digit(s): return any(char.isdigit() for char in s)
Create a function that takes a list of strings as input and returns a new list with only the strings that contain at least one digit.	def filter_strings_with_digits(string_list): return [string for string in string_list if any(char.isdigit() for char in string)]
Write a Python function that takes a dictionary as input and returns the sum of all values in the dictionary.	def sum_dict_values(input_dict): return sum(input_dict.values())
Implement a Python function to find the maximum value in a list of integers that are less than or equal to a given number.	def find_max_less_or_equal(input_list, max_value): return max(value for value in input_list if value <= max_value)
Create a function that takes a string as input and returns the string with all vowels removed.	def remove_vowels(input_string): vowels = 'aeiouAEIOU' return ''.join([char for char in input_string if char not in vowels])
Write a Python function that takes a list of lists as input and returns a new list with all sublists concatenated.	def flatten_list(input_list): return [element for sublist in input_list for element in sublist]
Write a Python function that takes a list of integers as input and returns the count of all the numbers that are divisible by 3.	def count_divisible_by_three(numbers): count = 0 for num in numbers: if num % 3 == 0: count += 1 return count
Create a Python function to find all the palindrome words in a given list of strings.	def find_palindromes(word_list): palindromes = [] for word in word_list: if word == word[::-1]: palindromes.append(word) return palindromes
Write a Python program to calculate the Simple Moving Average (SMA) of a list of numbers given a specified window size.	def calculate_sma(numbers, window_size): sma_values = [] for i in range(len(numbers) - window_size + 1): window = numbers[i:i + window_size] sma = sum(window) / window_size sma_values.append(sma) return sma_values
Write a Python function that takes a list of lists as input and returns the maximum sum of elements in each sublist.	def max_sum_sublists(list_of_lists): max_sums = [] for sublist in list_of_lists: max_sums.append(max(sublist)) return max_sums
Create a Python function to convert a given temperature from Celsius to Fahrenheit.	def celsius_to_fahrenheit(celsius): fahrenheit = (celsius * 9/5) + 32 return fahrenheit
Write a function that takes a list of integers as input and returns the count of even numbers in the list.	def count_even_numbers(lst): count = 0 for num in lst: if num % 2 == 0: count += 1 return count
Given a string `s` consisting of alphabets, write a function to return the count of vowels in the string.	def count_vowels(s): vowels = 'aeiouAEIOU' count = 0 for char in s: if char in vowels: count += 1 return count
Write a function that takes a dictionary as input and returns the sum of all values in the dictionary.	def sum_dict_values(d): return sum(d.values())
Given a list of strings, write a function that returns the longest string in the list.	def longest_string(lst): return max(lst, key=len)
Write a function that takes a list of integers as input and returns the count of numbers that are divisible by 5.	def count_divisible_by_5(lst): count = 0 for num in lst: if num % 5 == 0: count += 1 return count
Write a function that takes a list of strings as input and returns a new list that contains only the strings that are longer than a given minimum length.	def filter_strings(lst, min_len): return [s for s in lst if len(s) > min_len]
Write a class called "Circle" with attributes "radius" and methods "area" and "circumference".	import math class Circle: def __init__(self, radius): self.radius = radius def area(self): return math.pi * self.radius ** 2 def circumference(self): return 2 * math.pi * self.radius
Write a function that takes a list of integers as input and returns the second largest number in the list.	def second_largest(lst): if len(lst) < 2: return None max_num = second_max_num = float('-inf') for num in lst: if num > max_num: second_max_num = max_num max_num = num elif num > second_max_num and num != max_num: second_max_num = num return second_max_num
Write a function that takes a string as input and returns the string with all the characters in uppercase.	def to_uppercase(s): return s.upper()
Write a function that takes a list of lists of integers as input and returns a new list that contains the maximum number from each sublist.	def max_from_sublists(lst): return [max(sublist) for sublist in lst]
Create a function that converts a list of strings into a single string separated by commas.	def concatenate_list(input_list): return ','.join(input_list)
Write a function that calculates the area of a rectangle given its dimensions.	def calculate_area(length, width): return length * width
Create a function that filters out all even numbers from a given list.	def filter_even_numbers(input_list): return [num for num in input_list if num % 2 != 0]
Given a sentence, write a function to capitalize the first letter of each word.	def capitalize_words(sentence): return ' '.join(word.capitalize() for word in sentence.split())
Write a function that takes a list of numbers as input and returns a new list containing only the numbers that are less than a specified threshold.	def filter_numbers(input_list, threshold): return [num for num in input_list if num < threshold]
Create a function that takes a string as input and returns the string with all vowels removed.	def remove_vowels(input_string): vowels = 'aeiouAEIOU' return ''.join(char for char in input_string if char not in vowels)
Write a function that takes a list of integers and returns the sum of all the prime numbers in the list.	def sum_of_primes(input_list): def is_prime(num): if num < 2: return False for i in range(2, int(num**0.5) + 1): if num % i == 0: return False return True return sum(num for num in input_list if is_prime(num))
Given a dictionary, write a function to find the key that has the maximum value.	def find_max_value_key(input_dict): return max(input_dict, key=input_dict.get)
Create a function that takes a list of strings as input and returns a new list containing only the strings that start with a specified prefix.	def filter_strings(input_list, prefix): return [string for string in input_list if string.startswith(prefix)]
Write a function that takes a list of numbers as input and returns the median of the list.	def calculate_median(input_list): sorted_list = sorted(input_list) n = len(sorted_list) if n % 2 == 0: return (sorted_list[n//2 - 1] + sorted_list[n//2]) / 2 else: return sorted_list[n//2]
Given an unsorted list of integers, write a Python function to find the maximum occurs frequency of any element in the list.	def max_frequency(lst): freq_dict = {} for elem in lst: if elem in freq_dict: freq_dict[elem] += 1 else: freq_dict[elem] = 1 return max(freq_dict.values())
Write a function that takes a string as input and returns the string with all vowels removed.	def remove_vowels(s): vowels = 'aeiouAEIOU' return ''.join([char for char in s if char not in vowels])
Write a Python function that takes a list of integers as input and returns a new list containing the elements in reverse order.	def reverse_list(lst): return lst[::-1]
Implement a function that takes a list of strings as input and returns the length of the longest string.	def longest_string_length(lst): return max(len(s) for s in lst)
Write a Python function that takes two integers as input and returns their greatest common divisor.	def gcd(a, b): while b != 0: a, b = b, a % b return a
Write a Python function to find the maximum element in a given list of integers.	def find_max(lst): if len(lst) == 0: return None else: return max(lst)
Create a class called Circle with attributes radius. The class should have methods to calculate the area and circumference.	import math class Circle: def __init__(self, radius): self.radius = radius def calculate_area(self): return math.pi * (self.radius ** 2) def calculate_circumference(self): return 2 * math.pi * self.radius
Write a Python function to determine whether a given string is a palindrome or not. The function should return True if the string is a palindrome, and False otherwise.	def is_palindrome(s): s = s.replace(" ", "").lower() return s == s[::-1]
Create a function that takes in a positive integer and returns its square root if the number is a perfect square, and -1 otherwise.	import math def find_square_root(n): sqrt = math.sqrt(n) if sqrt == int(sqrt): return sqrt else: return -1
Write a Python program to print the multiplication table of a given integer from 1 to 10.	def print_multiplication_table(n): for i in range(1, 11): print(f"{n} * {i} = {n * i}")
Write a Python function to find the maximum value in a nested list of integers. For example, if the input list is [[1, 2, 3], [4, 5, 6], [7, 8, 9]], the function should return 9.	def max_nested_list(lst): return max(max(sublist) for sublist in lst)
Write a Python program to sort a list of dictionaries by a specific key. For example, if the input list is [{'name': 'Alice', 'age': 25}, {'name': 'Bob', 'age': 30}, {'name': 'Charlie', 'age': 20}], the function should return a list sorted by the 'age' key.	def sort_dict_list(dict_list, key): return sorted(dict_list, key=lambda x: x[key])
Write a Python function to find all permutations of a given string. For example, if the input string is 'abc', the function should return ['abc', 'acb', 'bac', 'bca', 'cab', 'cba'].	import itertools def all_permutations(s): return [''.join(p) for p in itertools.permutations(s)]
Write a Python function to find the first duplicate in a given list of integers. For example, if the input list is [1, 2, 3, 4, 2, 5], the function should return 2.	def first_duplicate(lst): seen = set() for num in lst: if num in seen: return num seen.add(num) return None
Write a Python function to convert a given binary string to an integer. For example, if the input string is '1010', the function should return 10.	def bin_to_int(s): return int(s, 2)
Create a function called find_largest_difference that takes a list of integers as input and returns the largest difference between any two elements in the list.	def find_largest_difference(lst): return max(i - j for i in lst for j in lst)
Write a function called is_palindrome that takes a string as input and returns True if the string is a palindrome and False otherwise.	def is_palindrome(s): return s == s[::-1]
Create a function called count_vowels that takes a string as input and returns the total count of all vowels in the string, ignoring case sensitivity.	def count_vowels(s): vowels = 'aeiou' return sum(1 for char in s.lower() if char in vowels)
Write a function called calculate_average_grade that takes a list of grades as input and returns the average grade.	def calculate_average_grade(grades): return sum(grades) / len(grades)
Create a function called find_common_elements that takes two lists of integers as input and returns a list of common elements between the two lists.	def find_common_elements(lst1, lst2): return [element for element in lst1 if element in lst2]
Write a function that takes a string as input and returns the frequency of each character in the string, ignoring case and ignoring non-alphabetic characters.	def char_frequency(input_string): frequency_dict = {} for char in input_string: if char.isalpha(): char = char.lower() if char in frequency_dict: frequency_dict[char] += 1 else: frequency_dict[char] = 1 return frequency_dict
Create a function that takes a list of lists as input, where each sublist contains two elements, and returns a dictionary where the first element of each sublist is a key and the second element is the value.	def list_to_dict(list_of_lists): result_dict = {} for sublist in list_of_lists: result_dict[sublist[0]] = sublist[1] return result_dict
Implement a function to find the average of all elements in a list of integers.	def average_of_list(input_list): sum_of_elements = sum(input_list) average = sum_of_elements / len(input_list) return average
Write a function that takes a list of integers as input and returns the list sorted in ascending order without using the built-in sort function or sorted method.	def sort_list(input_list): for i in range(len(input_list)): for j in range(i+1, len(input_list)): if input_list[i] > input_list[j]: input_list[i], input_list[j] = input_list[j], input_list[i] return input_list
Create a function that takes a list of strings as input and returns the longest string in the list.	def longest_string(input_list): longest_str = max(input_list, key=len) return longest_str
Given a list of integers, create a function that returns the maximum sum of a contiguous subarray within the one-dimensional array.	def max_subarray_sum(nums): max_sum = float('-inf') current_sum = 0 for num in nums: current_sum = max(num, current_sum + num) max_sum = max(max_sum, current_sum) return max_sum
Implement a function that takes a string as input and returns the string with all vowels removed.	def remove_vowels(s): vowels = 'aeiouAEIOU' return ''.join([char for char in s if char not in vowels])
Write a function that takes a list of integers as input and returns the number of pairs of integers with a difference of 1.	def count_pairs(nums): count = 0 num_set = set(nums) for num in num_set: if num + 1 in num_set: count += 1 return count
Create a Python function that takes a list of strings as input and returns a new list with all strings in uppercase.	def uppercase_strings(str_list): return [s.upper() for s in str_list]
Implement a function that takes a list of lists as input, where each sublist contains two strings, and returns a new list with the concatenated strings.	def concatenate_strings(str_list): return [a + b for a, b in str_list]
Create a function 'count_vowels' that takes a string as input and returns the count of all vowels in the string.	def count_vowels(s): vowels = "aeiou" count = 0 for char in s: if char.lower() in vowels: count += 1 return count
Write a Python function that takes a list of strings as input and returns the longest string in the list.	def longest_string(lst): longest = "" for s in lst: if len(s) > len(longest): longest = s return longest
Implement a function that takes a list of integers as input and returns the sum of the squares of all numbers in the list.	def sum_of_squares(lst): sum = 0 for num in lst: sum += num ** 2 return sum
Create a function 'filter_even_numbers' that takes a list of integers as input and returns a new list containing only the even numbers from the input list.	def filter_even_numbers(lst): even_numbers = [] for num in lst: if num % 2 == 0: even_numbers.append(num) return even_numbers
Write a Python function that takes a string as input and returns the string with all uppercase characters changed to lowercase and vice versa.	def swap_case(s): return s.swapcase()
Write a Python function to find the maximum sum of a subarray within a one-dimensional array of numbers.	def max_subarray_sum(nums): if not nums: return 0 max_sum = float('-inf') current_sum = 0 for num in nums: current_sum = max(num, current_sum + num) max_sum = max(max_sum, current_sum) return max_sum
Write a Python function that takes a list of strings as input and returns the longest common prefix among all the strings.	def longest_common_prefix(strs): if not strs: return "" prefix = strs[0] for s in strs: while not s.startswith(prefix): prefix = prefix[:-1] return prefix
Write a Python function to find the middle element of a singly linked list.	class Node: def __init__(self, x): self.val = x self.next = None def find_middle(head): slow = fast = head while fast and fast.next: slow = slow.next fast = fast.next.next return slow.val
Write a Python function that takes a list of integers as input and returns the count of even numbers in the list.	def count_even(nums): return sum(1 for num in nums if num % 2 == 0)
Write a Python function to find the maximum product of two elements in a list of integers.	def max_product(nums): if len(nums) < 2: return 0 nums.sort() return max(nums[-1] * nums[-2], nums[0] * nums[1])
Write a function that takes a list of integers as input and returns the count of numbers that are divisible by 3 and 5.	def count_divisible(lst): count = 0 for num in lst: if num % 3 == 0 and num % 5 == 0: count += 1 return count
Write a function that takes a string as input and returns True if the string contains at least one uppercase letter, False otherwise.	def has_uppercase(s): for char in s: if char.isupper(): return True return False
Write a function that takes a list of integers as input and returns the sum of the cubes of all numbers in the list.	def sum_cubes(lst): total = 0 for num in lst: total += num ** 3 return total
Write a function that takes two strings as input and returns True if the two strings are anagrams of each other, False otherwise.	def are_anagrams(s1, s2): return sorted(s1) == sorted(s2)
Write a function that takes a list of integers as input and returns the count of numbers that are greater than their adjacent numbers.	def count_greater(lst): count = 0 for i in range(1, len(lst)): if lst[i] > lst[i - 1]: count += 1 return count
Write a Python function that takes a string as input and returns the frequency of each character in the string, ignoring case sensitivity and white spaces.	def char_frequency(str): str = str.replace(" ", "").lower() freq = {} for char in str: if char in freq: freq[char] += 1 else: freq[char] = 1 return freq
Write a Python function that takes a list of integers as input and returns the maximum sum of a contiguous subarray within the list.	def max_subarray_sum(lst): max_sum = float('-inf') current_sum = 0 for num in lst: current_sum = max(num, current_sum + num) max_sum = max(max_sum, current_sum) return max_sum
Write a Python function that takes a dictionary as input and returns a new dictionary with only the items where the value is an even number.	def even_valued_dict(dct): new_dict = {} for key, val in dct.items(): if val % 2 == 0: new_dict[key] = val return new_dict
Write a Python function that takes a string as input and returns the string with all vowels removed.	def remove_vowels(str): vowels = 'aeiouAEIOU' return ''.join([char for char in str if char not in vowels])
Write a Python function that takes a list of strings as input and returns the longest common prefix among all the strings.	def common_prefix(lst): prefix = '' for chars in zip(*lst): if len(set(chars)) == 1: prefix += chars[0] else: break return prefix
Write a Python function that takes a list of strings as input and returns a new list where all strings that contain the word 'the' are removed.	def remove_the(lst): return [s for s in lst if 'the' not in s.lower()]
Implement a Python program that calculates the standard deviation of a list of numbers.	import math def calculate_std_dev(lst): n = len(lst) mean = sum(lst) / n variance = sum((x - mean) ** 2 for x in lst) / n return math.sqrt(variance)
Develop a Python function to reverse each word in a given string.	def reverse_words(s): return ' '.join(word[::-1] for word in s.split())
Create a Python function that takes a list of dictionaries as input and returns a new list where each dictionary is sorted by keys.	def sort_dicts(lst): return [{k: v for k, v in sorted(d.items())} for d in lst]
Write a Python function that takes a string as input and returns the string with all vowels removed.	def remove_vowels(s): vowels = 'aeiouAEIOU' return ''.join(c for c in s if c not in vowels)
Write a function that takes a string as input and returns the count of vowels in the string.	def count_vowels(s): vowels = 'aeiouAEIOU' count = 0 for char in s: if char in vowels: count += 1 return count
Write a function that takes a list of integers as input and returns the count of prime numbers in the list.	def count_primes(lst): def is_prime(n): if n < 2: return False for i in range(2, int(n**0.5) + 1): if n % i == 0: return False return True count = 0 for num in lst: if is_prime(num): count += 1 return count
Write a function that takes a list of strings as input and returns the count of strings that start with a vowel.	def count_strings_starting_with_vowel(lst): vowels = 'aeiouAEIOU' count = 0 for s in lst: if s and s[0] in vowels: count += 1 return count
Write a function that takes a dictionary as input and returns the sum of all values in the dictionary.	def sum_dict_values(d): return sum(d.values())
Write a function that takes two lists of integers as input and returns the intersection of the two lists.	def intersection(lst1, lst2): return [num for num in lst1 if num in lst2]
You are given a dictionary where the keys are strings and the values are integers. Write a Python function to find the string key that has the maximum value. The function should return the string key with the maximum value.	def find_max_key(d): return max(d, key=d.get)
Write a Python function to calculate the sum of all the elements in a two-dimensional list.	def sum_2d_list(lst): return sum(sum(sublist) for sublist in lst)
You are given a list of strings. Write a Python function to find the longest string in the list. The function should return the longest string.	def find_longest_string(lst): return max(lst, key=len)
Write a Python function to remove all vowels from a given string. The function should return the string without vowels.	def remove_vowels(s): return ''.join([c for c in s if c.lower() not in 'aeiou'])
You are given a list of integers. Write a Python function to find the second largest number in the list. The function should return the second largest number.	def find_second_largest(lst): lst = list(set(lst)) lst.sort() return lst[-2]
Create a Python function that checks if a given string is a palindrome or not. A palindrome is a string that reads the same backward as forward.	def is_palindrome(s): s = s.replace(" ", "") # remove spaces return s == s[::-1] # compare string with its reverse
Write a Python function to calculate the factorial of a given integer. The factorial of a number is the product of all positive integers less than or equal to that number.	def factorial(n): if n == 0 or n == 1: return 1 else: return n * factorial(n-1)
Create a Python class called Student with the following properties: student name, roll number, and marks. The class should also have methods to update and display the student's information.	class Student: def __init__(self, name, roll, marks): self.name = name self.roll = roll self.marks = marks def update_marks(self, new_marks): self.marks = new_marks def display_info(self): return f"Name: {self.name}, Roll Number: {self.roll}, Marks: {self.marks}"
Write a Python function that takes a list of integers as input and returns the second largest number in the list.	def second_largest(nums): nums = list(set(nums)) # remove duplicates nums.sort() return nums[-2] # return the second last element
Create a Python function that converts a given binary number to decimal.	def binary_to_decimal(binary): return int(binary, 2) # built-in int function to convert binary to decimal
Create a Python function that takes a string as input and returns the string with all vowels removed.	def remove_vowels(input_string): vowels = 'aeiouAEIOU' return ''.join([char for char in input_string if char not in vowels])
Write a Python program to find the first duplicate in a given list.	def find_first_duplicate(lst): seen = set() for item in lst: if item in seen: return item seen.add(item) return None
Create a Python class called Employee with the following properties: employee ID, name, age, and salary. The class should have a method to increase the salary.	class Employee: def __init__(self, employee_id, name, age, salary): self.employee_id = employee_id self.name = name self.age = age self.salary = salary def increase_salary(self, percentage): self.salary *= (1 + percentage / 100)
Write a Python function that takes a list of integers as input and returns a new list with the same elements but in reverse order without using the built-in reverse function or slicing.	def reverse_list(input_list): result = [] for i in range(len(input_list) - 1, -1, -1): result.append(input_list[i]) return result
Create a Python function that takes two lists of integers as input and returns a new list with elements that are common to both lists.	def find_common_elements(list1, list2): return [element for element in list1 if element in list2]
Write a Python function that takes a list of integers as input and returns the difference between the maximum and minimum values in the list.	def max_min_diff(lst): return max(lst) - min(lst)
Write a Python function that takes a string as input and returns True if the string starts with a vowel, and False otherwise.	def starts_with_vowel(s): vowels = 'aeiouAEIOU' return s[0] in vowels
Write a Python function that takes a list of integers as input and returns the sum of all the even numbers in the list.	def sum_of_evens(lst): return sum(num for num in lst if num % 2 == 0)
Write a Python function that takes two integers as input and returns their greatest common divisor (GCD).	import math def gcd(a, b): return math.gcd(a, b)
Write a Python function that takes a list of strings as input and returns the concatenation of all the strings in the list.	def concatenate_strings(lst): return ''.join(lst)
Write a function that takes a list of integers as input and returns the count of numbers that are divisible by 3 or 5.	def count_divisible(nums): count = 0 for num in nums: if num % 3 == 0 or num % 5 == 0: count += 1 return count
Design a function that takes a string as input and returns a new string where all occurrences of "Hello" have been replaced with "Goodbye".	def hello_goodbye(s): return s.replace("Hello", "Goodbye")
Write a function that takes a list of strings as input and returns the shortest string in the list.	def shortest_string(lst): return min(lst, key=len)
Write a Python program that takes a list of strings as input and returns the list of strings sorted in alphabetical order.	def alphabetical_order(lst): return sorted(lst)
Design a function that takes a list of integers as input and returns the sum of the squares of all numbers in the list.	def sum_of_squares(lst): return sum(x**2 for x in lst)
Write a Python function that takes a list of strings as input and returns the longest string in the list.	def find_longest_string(lst): return max(lst, key=len)
Implement a Python function to count the frequency of each element in a given list.	def count_frequency(lst): frequency = {} for element in lst: if element in frequency: frequency[element] += 1 else: frequency[element] = 1 return frequency
Write a Python function that takes a number as input and returns True if it's a prime number and False otherwise.	def is_prime(n): if n <= 1: return False elif n <= 3: return True elif n % 2 == 0 or n % 3 == 0: return False i = 5 while i * i <= n: if n % i == 0 or n % (i + 2) == 0: return False i += 6 return True
Implement a Python function to find the intersection of two lists, i.e., the elements that are present in both lists.	def find_intersection(lst1, lst2): return [element for element in lst1 if element in lst2]
Write a Python function that takes a list of integers as input and returns the second-largest number in the list.	def find_second_largest(lst): if len(lst) < 2: return None largest = second_largest = float('-inf') for num in lst: if num > largest: second_largest = largest largest = num elif num > second_largest and num != largest: second_largest = num return second_largest
Write a function 'find_common_elements' that takes two lists as input and returns a list of common elements between the two lists.	def find_common_elements(list1, list2): return [element for element in list1 if element in list2]
Write a Python program to calculate the average of a list of numbers.	def calculate_average(numbers): if len(numbers) == 0: return 0 return sum(numbers) / len(numbers)
Create a function that takes a list of strings as input and returns the longest string in the list.	def find_longest_string(strings): if len(strings) == 0: return '' return max(strings, key=len)
Write a Python function that takes a dictionary as input and returns the key with the highest value.	def find_key_with_max_value(dictionary): if len(dictionary) == 0: return None return max(dictionary, key=dictionary.get)
Create a program that takes a list of strings as input and returns a string with all the strings concatenated with a comma in between.	def concatenate_strings(strings): return ', '.join(strings)
Write a Python function to calculate the median of a list of numbers.	```python def calculate_median(numbers): numbers.sort() n = len(numbers) if n % 2 == 0: median = (numbers[n//2 - 1] + numbers[n//2]) / 2 else: median = numbers[n//2] return median ```
Write a Python function to count the number of vowels in a given string.	```python def count_vowels(s): vowels = 'aeiou' count = 0 for char in s.lower(): if char in vowels: count += 1 return count ```
Write a Python function to find the first duplicate in a list of integers.	```python def find_first_duplicate(numbers): seen = set() for num in numbers: if num in seen: return num seen.add(num) return None ```
Write a Python function to convert a given temperature from Celsius to Fahrenheit.	```python def celsius_to_fahrenheit(celsius): return (celsius * 9/5) + 32 ```
Write a Python function to check if a given number is a prime number.	```python def is_prime(n): if n <= 1: return False for i in range(2, int(n**0.5) + 1): if n % i == 0: return False return True ```
Write a Python function to count the number of tuples in a given list of tuples that have at least one element greater than 5.	``` def count_tuples_with_large_elements(tuples_list): count = 0 for tup in tuples_list: if any(x > 5 for x in tup): count += 1 return count ```
Write a Python function that takes a string as input and returns True if the string contains at least one uppercase letter, False otherwise.	``` def contains_uppercase(s): return any(c.isupper() for c in s) ```
Given a list of integers, write a Python function to find the difference between the maximum and minimum values in the list.	``` def max_min_diff(lst): return max(lst) - min(lst) ```
Write a Python function to remove duplicates from a given list and return the list in the same order as the original list.	``` def remove_duplicates(lst): seen = set() new_list = [] for item in lst: if item not in seen: seen.add(item) new_list.append(item) return new_list ```
Write a Python function that takes a list of strings as input and returns the string that occurs most frequently.	``` def most_frequent_string(strings): from collections import Counter counter = Counter(strings) return counter.most_common(1)[0][0] ```
Write a function to count the number of times the substring appears in the given string.	def count_substring(string, sub): return string.count(sub);
Write a Python function that takes a dictionary and a key as input, and returns the value associated with the key if it exists in the dictionary, and "Key not found" otherwise.	def get_value(dictionary, key): if key in dictionary: return dictionary[key]; else: return "Key not found";
Write a function that takes a list of integers and returns True if the list contains at least one pair of duplicate elements, False otherwise.	def has_duplicates(lst): return len(lst) != len(set(lst));
Write a function that takes a string as input and returns the string with all vowels removed.	def remove_vowels(s): vowels = 'aeiouAEIOU'; return ''.join(c for c in s if c not in vowels);
Write a function that takes a list of integers as input and returns the list sorted in descending order.	def sort_descending(lst): return sorted(lst, reverse=True);
Implement a function that takes a list of integers as input and returns the count of all integers in the list that are greater than a specified threshold value.	def count_greater_than_threshold(numbers, threshold): count = 0 for num in numbers: if num > threshold: count += 1 return count
Write a Python function that takes a string as input and returns the string with all vowels removed.	def remove_vowels(s): vowels = 'aeiouAEIOU' return ''.join([char for char in s if char not in vowels])
Design a Python function that takes a list of strings as input and returns the list sorted in alphabetical order.	def sort_strings(lst): return sorted(lst)
Implement a function that takes a string as input and returns the string reversed.	def reverse_string(s): return s[::-1]
Write a Python function that takes a dictionary as input and returns a new dictionary with all keys converted to uppercase.	def uppercase_keys(d): return {key.upper(): value for key, value in d.items()}
Write a Python function that takes a string as input and returns a new string that contains only the characters at even indices. For example, if the input string is "python", the function should return "pto".	def even_chars(s): return s[::2]
You need to write a Python function that takes a dictionary of items and their prices as input and returns the total cost of all items in the dictionary with prices that are above $10.00. For example, if the input dictionary is {"apple": 5.00, "banana": 3.00, "orange": 12.00, "grape": 15.00}, the function should return 27.00.	def total_costabove_10(d): total_cost = 0 for key, value in d.items(): if value > 10.00: total_cost += value return total_cost
Write a Python function that takes a list of strings as input and returns a new list that contains only the strings that have more than 5 characters. For example, if the input list is ["apple", "banana", "orange", "grape", "p"], the function should return ["apple", "banana", "orange", "grape"].	def strings_more_than_five(lst): return [s for s in lst if len(s) > 5]
You need to write a Python function that takes a list of integers as input and returns the sum of all odd numbers in the list. For example, if the input list is [1, 2, 3, 4, 5, 6], the function should return 9.	def sum_of_odd_numbers(lst): return sum(num for num in lst if num % 2 != 0)
Write a Python function that takes a string as input and returns a dictionary where the keys are the unique characters in the string and the values are the counts of each character. For example, if the input string is "hello world", the function should return {"h": 1, "e": 1, "l": 3, "o": 2, " ": 1, "w": 1, "r": 1, "d": 1}.	def char_counts(s): d = {} for char in s: if char in d: d[char] += 1 else: d[char] = 1 return d
Create a program that takes a string as input and returns the string with all digits removed.	def remove_digits(s): return ''.join(c for c in s if not c.isdigit())
Write a Python function that takes a list of strings as an argument and returns a new list with all the strings concatenated into a single string.	def concatenate_strings(string_list): return ''.join(string_list)
Implement a Python program that takes a string as input and returns True if the string reads the same backwards as forwards, False otherwise.	def is_palindrome(s): return s == s[::-1]
Create a Python function that accepts a list of strings as input and returns the longest string in the list.	def longest_string(string_list): return max(string_list, key=len)
Write a function that takes a string and a character as input, and returns the number of occurrences of the character in the string (case insensitive).	def count_occurrences(s, c): return s.lower().count(c.lower())
Write a function that takes a list of strings as input and returns a new list that includes only the strings with a length greater than 3.	def filter_strings(lst): return [s for s in lst if len(s) > 3]
Implement a function that takes a list of integers as input and returns the count of all the numbers that are perfect squares.	import math def count_perfect_squares(lst): count = 0 for num in lst: root = math.sqrt(num) if int(root + 0.5) ** 2 == num: count += 1 return count
Write a function that takes a list of integers as input and returns a new list containing only the numbers that are not divisors of 10.	def filter_divisors(lst): return [num for num in lst if num % 10 != 0]
Develop a Python function that takes a list of strings as input and returns a new list that includes only the strings that contain at least one digit.	def filter_strings_with_digits(lst): return [s for s in lst if any(char.isdigit() for char in s)]
Implement a function that takes a list of integers as input and returns the count of all the numbers that are within 5 units of the average of the list.	def count_numbers_near_average(lst): average = sum(lst) / len(lst) return len([num for num in lst if abs(num - average) <= 5])
Given a list of strings, write a function that returns a set of strings in which all duplicate strings have been removed and the strings are sorted in alphabetical order.	def remove_duplicates_and_sort(input_list): return sorted(set(input_list))
Write a function that takes a list of strings as input and returns a list of strings in which all strings have been converted to uppercase.	def convert_to_uppercase(input_list): return [string.upper() for string in input_list]
Given a list of integers, write a function that returns the average of all the integers in the list.	def calculate_average(input_list): return sum(input_list) / len(input_list)
Write a function that takes a string as input and returns the string with all leading and trailing whitespace characters removed.	def remove_leading_and_trailing_whitespace(input_string): return input_string.strip()
Given a list of lists, write a function that flattens the list of lists into a single list.	def flatten_list(input_list): return [item for sublist in input_list for item in sublist]
Write a function to find the maximum value in a given list of numbers.	def find_max_value(lst): return max(lst)
Write a Python function to count the number of occurrences of a specific element in a list.	def count_element(lst, elem): return lst.count(elem)
Write a function that takes a string as input and returns the string with all vowels removed.	def remove_vowels(s): vowels = 'aeiouAEIOU' return ''.join([char for char in s if char not in vowels])
Write a Python function to find the second largest number in a list of integers.	def find_second_largest(lst): if len(lst) < 2: return None lst.sort() return lst[-2]
Write a function that takes a list of strings as input and returns a new list with all strings converted to uppercase.	def convert_to_uppercase(lst): return [s.upper() for s in lst]
You are given a string of lower case alphabets. Write a function `contains_all_vowels` that returns true if all the vowels (a, e, i, o, u) are present in the string, false otherwise.	problem: You are given a string of lower case alphabets. Write a function `contains_all_vowels` that returns true if all the vowels (a, e, i, o, u) are present in the string, false otherwise; solution: def contains_all_vowels(s): vowels = set("aeiou") return vowels.issubset(set(s))
You have a list of strings, where each string represents a different course, and you need to write a function `common_characters` that returns the characters that are common in all the courses.	def common_characters(courses): if not courses: return [] common_chars = set(courses[0]) for course in courses[1:]: common_chars &= set(course) return list(common_chars)
Write a function `frequency_order` that takes a list of words as input, and returns a list of words in the order of their frequency (highest frequency first).	from collections import Counter def frequency_order(words): freq = Counter(words) return [word for _, word in sorted([(freq[w], w) for w in freq], reverse=True)]
Write a function ` deletion_distance` that takes two strings as input and returns the minimum number of character deletions required to make the two strings identical.	def deletion_distance(str1, str2): m, n = len(str1), len(str2) dp = [[0] * (n + 1) for _ in range(m + 1)] for i in range(m + 1): for j in range(n + 1): if i == 0: dp[i][j] = j elif j == 0: dp[i][j] = i elif str1[i - 1] == str2[j - 1]: dp[i][j] = dp[i - 1][j - 1] else: dp[i][j] = 1 + min(dp[i - 1][j], dp[i][j - 1]) return dp[m][n]
You are given a list of integers, and you need to write a function `max_size_subarray` that returns the maximum size of a subarray that contains an equal number of odd and even numbers.	def max_size_subarray(nums): count, max_size, handicap = 0, 0, {0: 0} for i, num in enumerate(nums): count += 1 if num % 2 else -1 if count not in handicap: handicap[count] = i max_size = max(max_size, i - handicap[count] + 1) return max_size
Implement a Stack class using a list. The class should have the following methods: push, pop, and peek. The push method should add an element to the top of the stack, the pop method should remove an element from the top of the stack, and the peek method should return the element at the top of the stack without removing it.	class Stack: def __init__(self): self.stack = [] def push(self, element): self.stack.append(element) def pop(self): if not self.is_empty(): return self.stack.pop() else: return None def peek(self): if not self.is_empty(): return self.stack[-1] else: return None def is_empty(self): return len(self.stack) == 0
Write a function to find all permutations of a given string.	import itertools def find_permutations(s): return [''.join(p) for p in itertools.permutations(s)]
Implement a Binary Search Tree (BST) Node class. The class should have an initializer method to initialize the node with a value, and attributes to store the left and right child nodes.	class Node: def __init__(self, value): self.value = value self.left = None self.right = None
Write a function to count the occurrences of each digit from 0 to 9 in a given integer.	def count_digits(n): count = [0] * 10 while n > 0: digit = n % 10 count[digit] += 1 n //= 10 return count
Implement a function to find all possible combinations of a given list of elements of a certain length.	import itertools def find_combinations(elements, length): return list(itertools.combinations(elements, length))
Write a function that takes a string as input and returns the string with all vowels removed.	def remove_vowels(s): vowels = 'aeiouAEIOU' return ''.join([ch for ch in s if ch not in vowels])
Given a list of strings, write a function that returns a new list containing the strings with all punctuation removed.	import string def remove_punctuation(lst): translator = str.maketrans('', '', string.punctuation) return [s.translate(translator) for s in lst]
Implement a Python function that takes a list of numbers as input and returns a new list with the square of each number.	def square_numbers(lst): return [n ** 2 for n in lst]
Write a function that takes a list of strings as input and returns the longest string in the list.	def longest_string(lst): return max(lst, key=len)
Given a list of numbers, write a function that returns a new list containing the numbers that are greater than the average of the list.	def greater_than_avg(lst): avg = sum(lst) / len(lst) return [n for n in lst if n > avg]
Write a Python function that takes a string as input and returns the count of the alphabets in the string that are in uppercase.	def count_uppercase_chars(input_string): count = 0 for char in input_string: if char.isupper(): count += 1 return count
Write a Python function that takes a list of integers as input and returns the maximum difference between any two elements in the list.	def max_diff_elements(input_list): return max(input_list) - min(input_list)
Write a Python function that takes a string as input and returns True if the string is a palindrome, False otherwise.	def is_palindrome(input_string): return input_string == input_string[::-1]
Write a Python function that takes a list of integers as input and returns a new list containing the numbers that are greater than a given number.	def filter_greater_than(input_list, target): return [num for num in input_list if num > target]
Write a Python function that takes a string as input and returns the string with all vowels removed.	def remove_vowels(input_string): vowels = 'aeiouAEIOU' return ''.join([char for char in input_string if char not in vowels])
Write a Python function that takes a list of strings as input and returns the shortest string in the list.	def find_shortest_string(input_list): return min(input_list, key=len)
Write a Python function that takes a list of integers as input and returns the count of all prime numbers in the list.	def count_prime_numbers(input_list): def is_prime(n): if n <= 1: return False if n <= 3: return True if n % 2 == 0 or n % 3 == 0: return False i = 5 while i * i <= n: if n % i == 0 or n % (i + 2) == 0: return False i += 6 return True return sum(1 for num in input_list if is_prime(num))
Write a Python function that takes a list of strings as input and returns a new list containing the strings that start with a vowel.	def filter_strings_start_with_vowel(input_list): vowels = 'aeiouAEIOU' return [string for string in input_list if string and string[0] in vowels]
Write a Python function that takes a list of integers as input and returns the count of all numbers that are multiples of 3 or 5.	def count_multiples_of_3_or_5(input_list): return sum(1 for num in input_list if num % 3 == 0 or num % 5 == 0)
Write a Python function that takes a string as input and returns the string with all digits removed.	def remove_digits(input_string): return ''.join([char for char in input_string if not char.isdigit()])
Write a function that takes a list of integers as input and returns the product of all the integers in the list.	def product_of_list(lst): product = 1 for num in lst: product *= num return product
Write a Python program to find the maximum length of a string in a given list of strings.	def max_string_length(lst): max_length = 0 for s in lst: if len(s) > max_length: max_length = len(s) return max_length
You are given a list of strings as an input, write a Python function to find all the strings that contain a specific substring.	def find_substring(lst, substr): result = [] for s in lst: if substr in s: result.append(s) return result
Write a function that takes a list of integers as input and returns the average of all the integers in the list.	def average_of_list(lst): return sum(lst) / len(lst)
Write a Python program to find the most frequent integer in a given list of integers.	def most_frequent_integer(lst): freq_dict = {} for num in lst: if num in freq_dict: freq_dict[num] += 1 else: freq_dict[num] = 1 max_freq = max(freq_dict.values()) most_frequent = [num for num, freq in freq_dict.items() if freq == max_freq] return most_frequent
Write a Python function that takes a string and a character as input, and returns the frequency of the character in the string.	def frequency_of_char(string, char): return string.count(char)
Write a Python function that takes a list of strings as input and returns a dictionary where the keys are the strings and the values are the lengths of the strings.	def string_length_dict(string_list): return {string: len(string) for string in string_list}
Write a Python function that takes two lists of integers as input and returns a list of integers that are present in both lists.	def common_elements(list1, list2): return [element for element in list1 if element in list2]
Write a Python function that takes a list of integers as input and returns the square of each integer in the list.	def square_numbers(numbers): return [number ** 2 for number in numbers]
Write a Python function that takes a string as input and returns the string with all lowercase characters converted to uppercase and vice versa.	def swap_case(string): return string.swapcase()
Write a function that finds all permutations of a given string and returns them as a list of strings.	def generate_permutations(input_string): if len(input_string) == 1: return [input_string] permutations = [] for i, char in enumerate(input_string): remaining_string = input_string[:i] + input_string[i+1:] for perm in generate_permutations(remaining_string): permutations.append(char + perm) return permutations
Write a function that takes a list of integers as input and returns the index of the first element that occurs only once in the list.	def find_unique_element(lst): occurrences = {} for element in lst: if element in occurrences: occurrences[element] += 1 else: occurrences[element] = 1 for index, element in enumerate(lst): if occurrences[element] == 1: return index return -1
Write a function that takes a list of strings as input and returns the longest common prefix of all the strings in the list.	def find_common_prefix(str_lst): if not str_lst: return "" prefix = str_lst[0] for s in str_lst[1:]: while not s.startswith(prefix): prefix = prefix[:-1] if not prefix: return "" return prefix
Write a function that takes a list of integers as input and returns True if the list is sorted in descending order, and False otherwise.	def is_descending(lst): return all(lst[i] >= lst[i+1] for i in range(len(lst)-1))
Write a function that takes an integer as input and returns the number of 1's in the binary representation of the number.	def count_set_bits(n): return bin(n).count("1")
Create a function `remove_duplicates` that takes a list of integers as input and returns a new list with all duplicates removed.	def remove_duplicates(lst): return list(set(lst))
Write a Python function `count_vowels` that takes a string as input and returns the number of vowels in the string.	def count_vowels(s): vowels = 'aeiou' return sum(1 for char in s.lower() if char in vowels)
Implement a Python program that takes a list of integers as input and returns the list with all even numbers at the beginning and all odd numbers at the end.	def sort_even_odd(lst): even_num = [num for num in lst if num % 2 == 0] odd_num = [num for num in lst if num % 2 != 0] return even_num + odd_num
Create a function `most_frequent_word` that takes a list of strings as input and returns the most frequent word in the list.	from collections import Counter def most_frequent_word(lst): word_counts = Counter(lst) return max(word_counts, key=word_counts.get)
Write a Python function `convert_to_title_case` that takes a string as input and returns the string in title case.	def convert_to_title_case(s): return s.title()
Convert a list of words into a string separated by a comma and a space.	def list_to_string(words): return ', '.join(words)
Create a function to count the total number of vowels in a string.	def count_vowels(s): vowels = 'aeiouAEIOU' count = 0 for char in s: if char in vowels: count += 1 return count
Write a function that takes a positive integer as input and returns the sum of its digits.	def sum_of_digits(n): return sum(int(digit) for digit in str(n))
Develop a Python function that takes a list of strings as input and returns the longest string in the list.	def longest_string(strings): return max(strings, key=len)
Create a function that takes a list of numbers and returns a new list with the squares of each number.	def squares(numbers): return [n**2 for n in numbers]
Create a function that takes a single string input and returns the first non-repeating character in the string. If no such character exists, return None.	def first_non_repeating_character(s): char_count = {} for char in s: if char in char_count: char_count[char] += 1 else: char_count[char] = 1 for char in s: if char_count[char] == 1: return char return None
Write a function to check if a given string is a palindrome. The function should return True if the string is a palindrome, and False otherwise.	def is_palindrome(s): return s == s[::-1]
Develop a Python program that takes a list of strings as input and returns the longest string in the list. If multiple strings have the same maximum length, return the first one.	def longest_string(lst): return max(lst, key=len)
Create a function that takes a single integer input and returns the sum of its digits.	def sum_of_digits(n): return sum(int(digit) for digit in str(n))
Write a function that takes a list of integers and returns the number of even numbers in the list.	def count_even_numbers(lst): return sum(1 for num in lst if num % 2 == 0)
Given a list of integers, write a function to find the maximum sum of a contiguous subarray within the one-dimensional array.	def max_subarray_sum(lst): if not lst: return 0 max_sum = current_sum = lst[0] for num in lst[1:]: current_sum = max(num, current_sum + num) max_sum = max(max_sum, current_sum) return max_sum
Create a Python function to count the number of occurrences of each word in a given string.	def count_word_occurrences(s): word_list = s.split() word_count = {} for word in word_list: word = word.lower() if word in word_count: word_count[word] += 1 else: word_count[word] = 1 return word_count
Implement a function that takes in a list of integers and returns the second largest number in the list.	def second_largest(lst): if len(lst) < 2: return None max_num = second_max = float('-inf') for num in lst: if num > max_num: second_max = max_num max_num = num elif num > second_max and num < max_num: second_max = num if second_max == float('-inf'): return None else: return second_max
Write a function that takes a string as input and returns True if the string contains at least one uppercase letter, False otherwise.	def has_uppercase(s): for char in s: if char.isupper(): return True return False
Write a function that takes a list of strings as input and returns the longest common prefix among all the strings.	def longest_common_prefix(str_list): if not str_list: return "" prefix = str_list[0] for s in str_list[1:]: while not s.startswith(prefix): prefix = prefix[:-1] if not prefix: return "" return prefix
Create a function that takes a string as input and returns the string with all occurrences of the substring "123" replaced with "456".	def replace_substring(input_string): return input_string.replace("123", "456")
Write a function that takes a list of integers as input and returns the sum of all the even numbers in the list.	def sum_even_numbers(number_list): return sum(num for num in number_list if num % 2 == 0)
Design a function that takes a list of strings as input and returns the list sorted in alphabetical order.	def sort_strings(input_list): return sorted(input_list)
Write a function that takes a string as input and returns True if the string is a palindrome, False otherwise.	def is_palindrome(input_string): return input_string == input_string[::-1]
Create a function that takes two lists of integers as input and returns a new list containing the elements that are common to both lists.	def common_elements(list1, list2): return [element for element in list1 if element in list2]
Write a Python function that takes a string as input and returns the string with all vowels removed.	def remove_vowels(s): vowels = 'aeiouAEIOU' return ''.join(c for c in s if c not in vowels)
Write a function that takes two lists as input and returns a list containing all elements that are in both lists.	def intersection(lst1, lst2): return [element for element in lst1 if element in lst2]
Write a function that takes a list of integers as input and returns the largest sum of a contiguous subarray.	def max_subarray_sum(lst): max_sum = -float('inf') current_sum = 0 for num in lst: current_sum = max(num, current_sum + num) max_sum = max(max_sum, current_sum) return max_sum
Write a function that takes a list of strings as input and returns a list of strings in uppercase.	def uppercase_strings(lst): return [s.upper() for s in lst]
Write a function that takes a list of integers as input and returns the number of pairs of integers that have a difference of 1.	def count_pairs_with_diff_1(lst): freq = {} for num in lst: if num in freq: freq[num] += 1 else: freq[num] = 1 count = 0 for num in freq: if num + 1 in freq: count += freq[num] * freq[num + 1] return count
Write a function that takes a list of strings as input and returns a new list containing strings that only have alphabetic characters.	def only_alpha(strings): result = [string for string in strings if string.isalpha()] return result
Write a function that takes a list of integers as input and returns the number of unique even numbers in the list.	def count_unique_evens(numbers): evens = [num for num in numbers if num % 2 == 0] return len(set(evens))
Write a function that takes a string as input and returns the string with all occurrences of "the" (case-insensitive) removed.	def remove_the(input_string): words = input_string.split() result = [word for word in words if word.lower() != 'the'] return ' '.join(result)
Write a function that takes a list of integers as input and returns the index of the first occurrence of the smallest number in the list.	def index_of_smallest(numbers): smallest = min(numbers) return numbers.index(smallest)
Write a function that takes a string as input and returns the string with all non-alphanumeric characters removed.	def remove_non_alphanumeric(input_string): result = ''.join(char for char in input_string if char.isalnum()) return result
Write a Python function to count the number of occurrences of each word in a given string, ignoring case sensitivity, and return a dictionary with the words as keys and their respective frequencies as values.	[Python code] Here are the five new problem-solution pairs: problem: Write a Python function to count the number of occurrences of each word in a given string, ignoring case sensitivity, and return a dictionary with the words as keys and their respective frequencies as values; solution: def count_word_frequencies(text): frequencies = {} words = text.lower().split() for word in words: if word in f…
In Python, write a function that takes a list of integers as input and returns the total sum of squares of all numbers in the list.	def sum_of_squares(numbers): return sum(num ** 2 for num in numbers)
Implement a Python function to count the number of digits in a given integer.	def count_digits(n): return len(str(abs(n)))
Create a Python function called `average_score` that takes a dictionary as an input, where the keys are student names and the values are their respective scores. The function should return the average score of all students.	def average_score(scores): total = sum(scores.values()) return total / len(scores)
Write a Python function that takes a list of strings as input, removes leading and trailing whitespaces from each string, and returns the resulting list.	def trim_strings(strings): return [s.strip() for s in strings]
Write a function to extract all vowels from a given string.	def extract_vowels(s): vowels = 'aeiouAEIOU' return ''.join(c for c in s if c in vowels)
Write a Python function to flatten a nested list of integers into a single list.	def flatten_list(nested_list): flat_list = [] for element in nested_list: if isinstance(element, list): flat_list.extend(flatten_list(element)) else: flat_list.append(element) return flat_list
Define a function to count the occurrences of a specific word in a given string.	def count_word_occurrences(s, word): words = s.split() return words.count(word)
Write a Python function that takes a list of strings as input and returns a dictionary where the keys are the strings and the values are the lengths of the strings.	def string_lengths(lst): return {s: len(s) for s in lst}
Write a function to reverse the order of elements in a list of integers.	def reverse_list(lst): return lst[::-1]
Given a list of integers, write a function that returns the second-largest number in the list. If the list has less than two unique numbers, return None.	def second_largest(lst): if len(set(lst)) < 2: return None lst = list(set(lst)) lst.sort() return lst[-2]
Write a class called "Circle" with attributes "radius" and methods "area" and "circumference".	import math class Circle: def __init__(self, radius): self.radius = radius def area(self): return math.pi * (self.radius ** 2) def circumference(self): return 2 * math.pi * self.radius
Write a Python function that takes a dictionary as input. The function should return the average value of the dictionary.	def average_dict_values(d): return sum(d.values()) / len(d)
Create a function that takes a string as input and returns the string with all vowels removed.	def remove_vowels(s): vowels = 'aeiouAEIOU' return ''.join([char for char in s if char not in vowels])
Given a list of integers, write a function that returns the number of pairs of adjacent elements that have a difference of 1.	def adjacent_diff_one(lst): count = 0 for i in range(len(lst) - 1): if abs(lst[i] - lst[i+1]) == 1: count += 1 return count
Write a function that takes a string as input and returns the string with all vowels removed.	def remove_vowels(input_string): vowels = "aeiouAEIOU" return "".join([char for char in input_string if char not in vowels])
You need to write a Python function that takes a list of strings as input and returns the longest string in the list.	def longest_string(input_list): return max(input_list, key=len)
Write a class called "Circle" with attributes "radius" and methods "area" and "circumference".	import math class Circle: def __init__(self, radius): self.radius = radius def area(self): return math.pi * self.radius ** 2 def circumference(self): return 2 * math.pi * self.radius
Write a function that takes a list of integers as input and returns a new list that contains only the even numbers.	def get_even_numbers(input_list): return [num for num in input_list if num % 2 == 0]
You are given a dictionary where the keys are student names and the values are their grades. Write a function to find the student with the highest grade.	def highest_grade(input_dict): return max(input_dict, key=input_dict.get)
Write a function that takes in a list of strings as input and returns a new list where all strings that contain the character 'e' are removed.	def remove_strings_with_e(lst): return [s for s in lst if 'e' not in s.lower()]
Write a function that takes a string as input and returns the string with all characters after the third occurrence of 'a' removed.	def remove_after_third_a(s): count = 0 new_s = '' for char in s: if char.lower() == 'a': count += 1 if count < 3: new_s += char return new_s
Write a function that takes a list of lists as input and returns the total count of all elements in all the inner lists.	def count_all_elements(lst): count = 0 for inner_lst in lst: count += len(inner_lst) return count
Write a function that takes a dictionary as input and returns a new dictionary where all keys and values are swapped.	def swap_dict_keys_values(d): return {v: k for k, v in d.items()}
Write a function that takes a list of integers as input and returns the count of all prime numbers in the list.	def count_primes(lst): def is_prime(n): if n < 2: return False for i in range(2, int(n**0.5) + 1): if n % i == 0: return False return True return sum(1 for num in lst if is_prime(num))
Implement a function that takes a list of integers as input and returns the count of elements that are greater than the average value of the list.	def count_greater_than_average(lst): if not lst: return 0 average = sum(lst) / len(lst) return sum(1 for num in lst if num > average)
Develop a function that takes a string as input and returns the string with all consecutive duplicate characters removed.	def remove_consecutive_duplicates(s): result = '' for char in s: if not result or char != result[-1]: result += char return result
Write a function that takes a list of integers and a target sum as input, and returns True if there exists a pair of integers in the list that add up to the target sum, False otherwise.	def has_pair_with_sum(lst, target_sum): num_set = set() for num in lst: if target_sum - num in num_set: return True num_set.add(num) return False
Implement a function that takes a string as input and returns the string in reverse order, without using the built-in reverse function or slicing with a negative step.	def reverse_string(s): result = '' for char in s: result = char + result return result
Develop a function that takes a list of integers as input and returns the list sorted in ascending order, using the Bubble Sort algorithm.	def bubble_sort(lst): n = len(lst) for i in range(n): for j in range(0, n - i - 1): if lst[j] > lst[j + 1]: lst[j], lst[j + 1] = lst[j + 1], lst[j] return lst
Write a Python function that takes two lists of integers and returns True if they contain the same elements.	def compare_lists(list1, list2): return sorted(list1) == sorted(list2)
Write a Python function that takes a string and returns the number of vowels it contains.	def count_vowels(s): vowels = 'aeiouAEIOU' return sum(1 for char in s if char in vowels)
Write a Python function that takes a list of integers and returns the smallest even number in the list.	def find_even(lst): even_nums = [num for num in lst if num % 2 == 0] return min(even_nums) if even_nums else None
Write a Python function that takes a string and returns a dictionary where the keys are the characters in the string and the values are the number of times each character appears.	def char_frequency(s): freq = {} for char in s: if char in freq: freq[char] += 1 else: freq[char] = 1 return freq
Write a Python function that takes a list of integers and returns True if all elements in the list are positive.	def all_positive(lst): return all(num > 0 for num in lst)
Write a function that takes in a list of integers and returns the sum of the squares of all the numbers in the list.	def sum_of_squares(numbers): total = 0 for num in numbers: total += num ** 2 return total
Create a Python program that takes in a string and returns the string with all non-alphabetic characters removed.	def remove_non_alpha_chars(s): new_string = "" for char in s: if char.isalpha(): new_string += char return new_string
Write a function that takes in a dictionary where the keys are the names of students and the values are their scores, and returns the average score of all students.	def average_score(students_dict): total_score = sum(students_dict.values()) average = total_score / len(students_dict) return average
Write a function that takes in two lists of integers and returns true if they contain the same elements in any order, false otherwise.	def same_elements(list1, list2): return sorted(list1) == sorted(list2)
Write a function that takes in a list of lists and returns a new list containing all the sublists that have at least three elements.	def filter_sublists(main_list): new_list = [] for sublist in main_list: if len(sublist) >= 3: new_list.append(sublist) return new_list
Write a function that takes in a list of strings and returns a new list that contains the first letter of each string.	def get_first_letters(list_of_strings): result = [] for string in list_of_strings: result.append(string[0]) return result
Create a Python program that takes in a list of integers and returns a new list that contains the squares of all the numbers in the list.	def squares_of_numbers(numbers): new_list = [] for num in numbers: new_list.append(num ** 2) return new_list
Write a function that takes in a string and returns the string in all uppercase.	def uppercase_string(s): return s.upper()
Write a function that takes in two integers and returns their greatest common divisor (GCD).	def find_gcd(a, b): while b != 0: a, b = b, a % b return a
Create a Python program that takes in a dictionary where the keys are the names of students and the values are their ages, and returns the age of the oldest student.	def find_oldest_student(students_dict): return max(students_dict.values())
Write a function that takes a string as an input and returns the count of vowels in the string.	def count_vowels(s): count = 0 for char in s: if char.lower() in 'aeiou': count += 1 return count
Write a Python program to check if a given string is in all uppercase.	def is_all_uppercase(s): return s.isupper()
Create a Python program to find the sum of all even numbers in a given list.	def sum_even_numbers(lst): return sum(num for num in lst if num % 2 == 0)
Write a function to find the longest word in a given sentence.	def longest_word(sentence): words = sentence.split() return max(words, key=len)
Create a Python program to check if a given list is in ascending order.	def is_ascending(lst): return all(lst[i] <= lst[i+1] for i in range(len(lst)-1))
Write a Python function to count the occurrences of a specific element in a given list.	def count_occurrences(lst, element): return lst.count(element)
Implement a function that takes a string as input and returns the string in uppercase with the first character of every word capitalized.	def capitalize_string(s): return s.upper().title()
You are given a list of integers. Create a Python function that returns the second largest number in the list.	def second_largest(lst): if len(lst) < 2: return None lst = list(set(lst)) # remove duplicates lst.sort() return lst[-2]
Write a Python function that takes two lists as input and returns a new list containing elements from both lists in alternating order.	def alternate_elements(lst1, lst2): result = [] length = max(len(lst1), len(lst2)) for i in range(length): if i < len(lst1): result.append(lst1[i]) if i < len(lst2): result.append(lst2[i]) return result
You are given a string that contains only alphabet characters. Create a Python function that checks if the string is a palindrome or not.	def is_palindrome(s): return s == s[::-1]
Given a list of strings, write a function that returns a new list containing the strings in reverse order.	def reverse_list(input_list): return input_list[::-1]
Given two sets of strings, write a function that returns a new set containing all the unique strings that are present in both sets.	def intersection_set(set1, set2): return set1 & set2
Write a Python function that accepts a list of integers as input and returns a new list containing the elements that are less than or equal to the average of all the integers in the input list.	def below_average(input_list): avg = sum(input_list) / len(input_list); return [num for num in input_list if num <= avg]
You need to write a Python function that takes a list of strings as input and returns the total count of all the vowels in all the strings.	def count_vowels(input_list): vowels = 'aeiou'; return sum(1 for string in input_list for char in string.lower() if char in vowels)
Implement a Python function that takes a list of integers as input and returns a new list containing only the elements that are in the range of 10 to 50 inclusive.	def filter_range(input_list): return [num for num in input_list if 10 <= num <= 50]
Write a Python function that accepts a list of strings as input and returns the longest string in the list.	def longest_string(input_list): return max(input_list, key=len)
Write a Python function to find the sum of all the elements in a given list.	def sum_of_list_elements(lst): return sum(lst)
Create a Python function that takes a string as input and returns the string with all vowels removed.	def remove_vowels(s): vowels = 'aeiouAEIOU' return ''.join([char for char in s if char not in vowels])
Write a Python function that takes a list of strings as input and returns the longest string in the list.	def find_longest_string(lst): return max(lst, key=len)
Create a Python function that takes a list of integers as input and returns a new list containing the absolute values of all the numbers.	def absolute_values(lst): return [abs(num) for num in lst]
Write a Python function that takes a list of integers as input and returns the count of the number of even numbers in the list.	def count_even_numbers(lst): return len([num for num in lst if num % 2 == 0])
Write a Python function to count the number of vowels in a given string.	def count_vowels(s): vowels = 'aeiou' count = 0 for char in s.lower(): if char in vowels: count += 1 return count
Write a function to check if a given list of integers is a subset of another list.	def is_subset(list1, list2): for num in list1: if num not in list2: return False return True
Write a function that calculates the average of all numbers in a given list.	def average_list(nums): return sum(nums) / len(nums)
Write a Python function that checks if a given string consists entirely of digits.	def is_all_digits(s): return s.isdigit()
Write a Python function that takes a list of strings as input and returns a new list where each string is in uppercase.	def uppercase_list(str_list): return [s.upper() for s in str_list]
Given a list of integers, write a function that returns a new list with all even numbers multiplied by 2.	def multiply_even_numbers(lst): return [x * 2 for x in lst if x % 2 == 0]
Write a Python function that accepts a dictionary as input and returns a new dictionary where all keys are uppercase.	def uppercase_keys(dct): return {k.upper(): v for k, v in dct.items()}
Write a Python function that accepts a string as input and returns the string with all characters shifted by 3 positions in the alphabet.	def shift_characters(s): result = "" for char in s: if char.isalpha(): if char.islower(): result += chr((ord(char) - 97 + 3) % 26 + 97) else: result += chr((ord(char) - 65 + 3) % 26 + 65) else: result += char return result
Write a Python function that accepts a list of tuples as input and returns a new list where each tuple is sorted in ascending order.	def sort_tuples(lst): return [tuple(sorted(t)) for t in lst]
Given a list of strings, write a function that returns the longest string in the list.	def find_longest_string(lst): return max(lst, key=len)
Write a function that takes a list of strings as input and returns the count of strings that start with a vowel.	def count_vowels(lst): vowels = 'aeiouAEIOU' count = 0 for string in lst: if string[0] in vowels: count += 1 return count
Develop a Python function that accepts a list of integers as input and returns the average of all numbers in the list, excluding the maximum and minimum values.	def average_excluding_extremes(lst): if len(lst) < 3: return None lst.sort() return sum(lst[1:-1]) / len(lst[1:-1])
Create a Python program that takes a list of dictionaries as input, where each dictionary contains a key 'name' and a key 'age', and returns a sorted list of the names of people older than 30.	def names_over_30(lst): return sorted([d['name'] for d in lst if d['age'] > 30])
Write a Python function that takes a list of integers as input and returns the sum of the cubes of all numbers in the list.	def sum_of_cubes(lst): return sum([n ** 3 for n in lst])
Develop a Python function that accepts a string as input and returns the string with all vowels removed.	def remove_vowels(s): vowels = 'aeiouAEIOU' return ''.join([char for char in s if char not in vowels])
Write a function that takes a string as input and returns the most frequently occurring character in the string.	def most_frequent_char(s): char_freq = {} for char in s: if char in char_freq: char_freq[char] += 1 else: char_freq[char] = 1 max_freq = max(char_freq.values()) most_freq_chars = [char for char, freq in char_freq.items() if freq == max_freq] return most_freq_chars[0]
Write a function that takes a list of strings as input and returns the longest string in the list.	def longest_string(lst): return max(lst, key=len)
Write a function that takes a list of integers as input and returns a new list with all the duplicates removed.	def remove_duplicates(lst): return list(set(lst))
Write a function that takes a string as input and returns the string with all the characters in uppercase.	def to_uppercase(s): return s.upper()
Write a function that takes a list of integers as input and returns the maximum difference between any two elements in the list.	def max_diff(lst): return max(lst) - min(lst)
Write a function that takes a list of tuples, where each tuple contains two integers, and returns the maximum sum of these tuples.	def max_sum_tuples(tuples_list): return max(sum(t) for t in tuples_list)
Write a Python function that takes a string of parentheses as input and returns True if they are balanced, False otherwise.	def balanced_parentheses(parentheses_str): stack = [] for parenthesis in parentheses_str: if parenthesis == '(': stack.append(parenthesis) elif parenthesis == ')': if not stack: return False stack.pop() return not stack
Write a function that takes a list of strings as input and checks if all the strings end with the same character, returning True if they do, False otherwise.	def same_ending(strings_list): if not strings_list: return True ending_char = strings_list[0][-1] for s in strings_list: if not s.endswith(ending_char): return False return True
Write a Python function that takes a list of integers as input and returns the count of integers that are divisible by 3 or 5.	def count_divisible_by_3_or_5(numbers_list): count = 0 for num in numbers_list: if num % 3 == 0 or num % 5 == 0: count += 1 return count
Write a function that takes a string as input and returns the string with all vowels removed.	def remove_vowels(input_str): vowels = 'aeiouAEIOU' return ''.join([char for char in input_str if char not in vowels])
Write a Python function that takes a list of integers as input and returns the product of all the integers in the list.	def product_of_numbers(numbers_list): product = 1 for num in numbers_list: product *= num return product
Write a function that takes a string as input and returns the string with all characters converted to lowercase and all spaces removed.	def normalize_string(input_str): return input_str.replace(' ', '').lower()
Write a Python function that takes a list of strings as input and returns a new list that contains only the strings that start with a vowel.	def start_with_vowel(strings): vowels = 'aeiouAEIOU' new_list = [s for s in strings if s[0] in vowels] return new_list
Write a Python function that calculates the sum of all the even numbers in a given list.	def sum_even_numbers(numbers): sum_even = sum(num for num in numbers if num % 2 == 0) return sum_even
Create a program that prints the first n Fibonacci numbers where n is a user input.	def fibonacci_numbers(n): fib_numbers = [0, 1] while len(fib_numbers) < n: fib_numbers.append(fib_numbers[-1] + fib_numbers[-2]) return fib_numbers[:n]
Write a Python function that takes a list of integers as input and returns a new list that contains the same numbers but in reverse order.	def reverse_list(numbers): return numbers[::-1]
Define a function that takes a string as input and returns the number of times the word "the" appears in the string.	def count_the_word(text): words = text.split() count = 0 for word in words: if word.lower() == 'the': count += 1 return count
Write a Python program to find the median of a list of numbers.	def find_median(lst): sorted_lst = sorted(lst) lst_len = len(lst) if lst_len % 2 == 0: median = (sorted_lst[lst_len//2 - 1] + sorted_lst[lst_len//2]) / 2 else: median = sorted_lst[lst_len//2] return median
A function takes a string as input and returns the count of all vowels in the string.	def count_vowels(s): vowels = "aeiouAEIOU" count = 0 for char in s: if char in vowels: count += 1 return count
Develop a Python program that takes a list of lists of integers as input and returns the count of lists that have at least one even number.	def count_lists_with_even(nums): count = 0 for lst in nums: if any(num % 2 == 0 for num in lst): count += 1 return count
Write a Python program to find the longest common prefix of a list of strings.	def longest_common_prefix(strings): prefix = "" for chars in zip(*strings): if len(set(chars)) == 1: prefix += chars[0] else: break return prefix
A function takes a list of integers as input and returns a list of pairs, where each pair contains a number and its count in the list.	def count_numbers(nums): num_count = {} for num in nums: if num in num_count: num_count[num] += 1 else: num_count[num] = 1 return list(num_count.items())
Design a function to check if a given string is a palindrome.	def is_palindrome(s): Palin = ''.join(reversed(s)) if Palin == s: return True else: return False
Write a Python function to sort a list of integers in descending order using the bubble sort algorithm.	def bubble_sort(lst): n = len(lst) for i in range(n): for j in range(0, n - i - 1): if lst[j] < lst[j + 1]: lst[j], lst[j + 1] = lst[j + 1], lst[j] return lst
Given a dictionary, write a Python function to swap its keys with its values.	def swap_dict_kv(d): return {v: k for k, v in d.items()}
Write a Python function to check if a given number is a prime number.	def is_prime(n): if n <= 1: return False elif n <= 3: return True elif n % 2 == 0 or n % 3 == 0: return False i = 5; while i * i <= n: if n % i == 0 or n % (i + 2) == 0: return False i += 6; return True
Design a function to find the intersection of two lists in Python.	def intersection(lst1, lst2): return list(set(lst1) & set(lst2))
Write a function to find the second largest number in a given list of integers. If no second largest number is found, return -1.	def second-largest(nums): nums = list(set(nums)) nums.sort(reverse=True) if len(nums) < 2: return -1 return nums[1]
Create a function that takes three lists of integers as input and returns a new list containing all the elements that are present in all three lists. The returned list should not contain duplicate values.	def common_elements(list1, list2, list3): set1 = set(list1) set2 = set(list2) set3 = set(list3) common = set1 & set2 & set3 return list(common)
Write a function that takes a string as input and returns True if the string contains at least one digit, and False otherwise.	def contains_digit(s): return any(char.isdigit() for char in s)
Write a Python function that takes a list of strings as an argument and returns the longest string in the list. If the list is empty, return an empty string.	def longest_string(strings): if not strings: return "" return max(strings, key=len)
Write a function that takes in a list of integers and returns the count of all numbers that are greater than the average of the list. If the list is empty, return 0.	def above_average(nums): if not nums: return 0 avg = sum(nums) / len(nums) return sum(1 for num in nums if num > avg)
Write a Python function that calculates the sum of all the digits in a given integer number.	def sum_of_digits(n): return sum(int(x) for x in str(n))
Write a Python function that takes a list of strings as input and returns a new list containing all the strings in uppercase.	def strings_to_uppercase(strings): return [s.upper() for s in strings]
Write a Python function that determines whether a given string is a palindrome, ignoring case and non-alphanumeric characters.	def is_palindrome(s): s = ''.join(e for e in s if e.isalnum()).lower() return s == s[::-1]
Write a Python function that takes two lists as input and returns a new list containing all the elements from the first list that are not present in the second list.	def list_difference(list1, list2): return [x for x in list1 if x not in list2]
Write a Python function that calculates the average of all the numbers in a given list, excluding the maximum and minimum values.	def average_excluding-extremes(lst): if len(lst) < 3: return None lst.remove(max(lst)) lst.remove(min(lst)) return sum(lst) / len(lst)
Write a function that takes a list of strings as input and returns the string with the maximum length.	def max_length_string(lst): return max(lst, key=len)
You are given a list of integers and you need to write a Python function that returns the count of all prime numbers in the list.	def count_primes(lst): def is_prime(n): if n <= 1: return False if n == 2: return True if n % 2 == 0: return False max_divisor = int(n**0.5) + 1 for d in range(3, max_divisor, 2): if n % d == 0: return False return True count = 0 for num in lst: if is_prime(num): count += 1 return count
Write a function that takes in a list of integers and returns the product of all positive numbers in the list.	def product_of_positives(lst): product = 1 for num in lst: if num > 0: product *= num return product
You are given a list of integers and you need to write a Python function that returns True if the list is sorted in ascending order, False otherwise.	def is_sorted(lst): return all(lst[i] <= lst[i+1] for i in range(len(lst)-1))
Write a Python function that takes an integer as input and returns the sum of its digits.	def sum_of_digits(n): return sum(int(digit) for digit in str(n))
Write a function that takes a list of strings as input and returns the longest string in the list. If the list is empty, return None.	def longest_string(lst): if not lst: return None return max(lst, key=len)
Write a function that takes two lists of integers as input and returns the intersection of the two lists, i.e., a list of integers that are common to both lists.	def intersection(lst1, lst2): return [num for num in lst1 if num in lst2]
Write a class to represent a rectangle. The class should have attributes for the width and height, and methods to calculate the area and perimeter of the rectangle.	class Rectangle: def __init__(self, width, height): self.width = width self.height = height def area(self): return self.width * self.height def perimeter(self): return 2 * (self.width + self.height)
Write a function that takes a string as input and returns the string with all consonants removed. The function should be case-insensitive, i.e., it should remove both lowercase and uppercase consonants.	def remove_consonants(s): vowels = 'aeiou' return ''.join(char for char in s if char.lower() in vowels)
Write a function that takes a dictionary as input and returns the key with the maximum value.	def max_value_key(d): return max(d, key=d.get)
Given a list of strings, write a function that returns a new list containing the strings that have more than three characters.	def filter_strings(lst): return [s for s in lst if len(s) > 3]
Write a function that takes a list of integers as an input and returns the index of the maximum value in the list.	def find_max_index(lst): return lst.index(max(lst))
Write a Python function that takes a dictionary as an input, where the keys are the names of students and the values are their corresponding grades. The function should return a new dictionary where the keys are the grades and the values are lists of students who got those grades.	def grade_dict(grades_dict): grade_to_students = {} for student, grade in grades_dict.items(): if grade not in grade_to_students: grade_to_students[grade] = [] grade_to_students[grade].append(student) return grade_to_students
Given a list of lists, write a function that returns a new list with the maximum length of the sublists.	def max_sublist_length(lst): return max(len(sublist) for sublist in lst)
You are given a string containing parentheses. Write a function to check if the parentheses are balanced. A set of parentheses is balanced if every open parenthesis has a corresponding close parenthesis.	def is_balanced(s): stack = [] for char in s: if char == '(': stack.append(char) elif char == ')': if not stack: return False stack.pop() return not stack
Write a Python function that takes a string as input and returns the count of each vowel in the string.	def count_vowels(s): vowels = 'aeiou' count_dict = {} for char in s.lower(): if char in vowels: if char in count_dict: count_dict[char] += 1 else: count_dict[char] = 1 return count_dict
Implement a Python function that takes a list of lists as input and returns the maximum sum of elements in any sublist.	def max_sublist_sum(list_of_lists): max_sum = float('-inf') for sublist in list_of_lists: sublist_sum = sum(sublist) if sublist_sum > max_sum: max_sum = sublist_sum return max_sum
Write a Python function that takes a string as input and returns the string with all vowels removed.	def remove_vowels(s): vowels = 'aeiouAEIOU' return ''.join([char for char in s if char not in vowels])
Implement a Python function that takes a list of integers as input and returns the count of all prime numbers in the list.	def count_primes(numbers): def is_prime(n): if n < 2: return False for i in range(2, int(n**0.5) + 1): if n % i == 0: return False return True prime_count = 0 for num in numbers: if is_prime(num): prime_count += 1 return prime_count
Write a Python function that takes a list of strings as input and returns the longest common prefix among all the strings in the list.	def longest_common_prefix(strings): if not strings: return "" prefix = strings[0] for s in strings[1:]: while not s.startswith(prefix): prefix = prefix[:-1] if not prefix: return "" return prefix
Write a function to find the mean of a list of numbers, without using the built-in mean function.	def calculate_mean(lst): if not lst: return None return sum(lst) / len(lst)
Write a function to determine whether a given string has all unique characters or not.	def has_unique_chars(s): return len(set(s)) == len(s)
Implement a function that takes a list of integers and returns the count of even numbers in the list.	def count_evens(lst): return sum(1 for num in lst if num % 2 == 0)
Write a function that takes a string as input and returns the string with all vowels removed.	def remove_vowels(s): vowels = 'aeiouAEIOU' return ''.join([c for c in s if c not in vowels])
Implement a function that takes two lists of integers as input and returns a list of elements that are present in both lists.	def find_common_elements(lst1, lst2): return list(set(lst1) & set(lst2))
Write a Python function that takes a string as an argument and returns the string with all vowels removed.	def remove_vowels(s): vowels = 'aeiouAEIOU' return ''.join([char for char in s if char not in vowels])
Given two lists of integers `list1` and `list2`, write a Python function to find the intersection of the two lists.	def intersection(list1, list2): return list(set(list1) & set(list2))
Write a Python function to find all duplicates in a given list.	def find_duplicates(lst): return [item for item in lst if lst.count(item) > 1]
Write a Python function to find the longest common prefix between two strings.	def longest_common_prefix(s1, s2): i = 0 while i < len(s1) and i < len(s2) and s1[i] == s2[i]: i += 1 return s1[:i]
Given a list of integers, write a Python function to find the first duplicate in the list.	def first_duplicate(lst): seen = set() for num in lst: if num in seen: return num seen.add(num) return None
Given a list of integers, write a function that returns a new list with all the even numbers at the beginning and the odd numbers at the end. For example, if the input is [3, 4, 1, 2, 5, 6], the output would be [4, 2, 6, 3, 1, 5].	def even_odd_separate(lst): even_nums = [num for num in lst if num % 2 == 0] odd_nums = [num for num in lst if num % 2 != 0] return even_nums + odd_nums
You are given a dictionary where the keys are words and the values are their lengths. Write a function to find all the words with maximum length in the dictionary.	def words_max_length(dct): max_len = max(dct.values()) words_with_max_len = [word for word, length in dct.items() if length == max_len] return words_with_max_len
Create a program that takes a list of integers as input and returns the number of duplicates in the list.	def count_duplicates(lst): count_dict = {} for num in lst: if num in count_dict: count_dict[num] += 1 else: count_dict[num] = 1 duplicate_count = 0 for value in count_dict.values(): if value > 1: duplicate_count += 1 return duplicate_count
You are given a list of strings where each string represents a date in the format "YYYY-MM-DD". Write a function that returns the earliest date in the list.	def earliest_date(lst): return min(lst)
Given a dictionary where the keys are currencies and the values are their exchange rates, write a function that returns a new dictionary with the currencies and their inverse exchange rates.	def inverse_exchange_rates(dct): inverse_exchange_rates_dict = {currency: 1/rate for currency, rate in dct.items()} return inverse_exchange_rates_dict
Write a function to calculate the average of all the numbers in a given list of integers that are greater than a certain threshold value.	def average_above_threshold(num_list, threshold): total_sum = 0 count = 0 for num in num_list: if num > threshold: total_sum += num count += 1 if count == 0: return 0 else: return total_sum / count
Create a function that takes a list of strings and returns a new list containing only the strings that start with a vowel.	def filter_vowel_strings(string_list): vowels = 'aeiouAEIOU' filtered_list = [string for string in string_list if string[0] in vowels] return filtered_list
Write a function to count the occurrences of a specific substring within a given string.	def count_substring_occurrences(main_string, sub_string): return main_string.count(sub_string)
Create a function to find the length of the longest common prefix among all strings in a given list of strings.	def longest_common_prefix(string_list): if not string_list: return 0 prefix = string_list[0] for string in string_list[1:]: while not string.startswith(prefix): prefix = prefix[:-1] return len(prefix)
Write a function to calculate the number of times a given string appears in a list of strings.	def count_string_occurrences(string_list, target_string): return string_list.count(target_string)
Write a Python function that takes a list of numbers as input and returns the sum of the squares of all numbers in the list.	def sum_of_squares(lst): return sum(i**2 for i in lst)
You are given a list of strings where each string represents the name of a person. Write a Python function that takes this list as input and returns a new list with all the names in sorted order.	def sort_names(lst): return sorted(lst)
Write a Python function that takes a string as input and returns True if the string is a palindrome, False otherwise.	def is_palindrome(s): return s == s[::-1]
You are given a dictionary where the keys are names of cities and the values are their populations. Create a Python function that prints the names of all cities with a population above 10000.	def print_large_cities(d): for key, value in d.items(): if value > 10000: print(key)
Write a Python function that takes two lists of integers as input and returns a new list that contains only the elements that are present in both lists.	def common_elements(lst1, lst2): return [i for i in lst1 if i in lst2]
Create a Python function that takes a list of strings as input and returns a new list containing the lengths of each string.	def string_lengths(lst): return [len(s) for s in lst]
Implement a function that takes a dictionary as input and returns a new dictionary containing only the items where the value is greater than 5.	def filter_dict(d): return {k: v for k, v in d.items() if v > 5}
Write a Python function that takes two lists of integers as input and returns a new list containing the sum of corresponding elements from both lists.	def sum_lists(lst1, lst2): return [a + b for a, b in zip(lst1, lst2)]
Write a function that takes a list of strings as input and returns a new list with all strings converted to lowercase.	def to_lower(lst): return [s.lower() for s in lst]
Create a Python function that takes a list of integers as input and returns a new list containing only the numbers that are greater than the average of the list.	def filter_above_avg(lst): avg = sum(lst) / len(lst) return [num for num in lst if num > avg]
You are given a string. Write a function to count the number of vowels in the string.	def count_vowels(input_string): count = 0 vowels = 'aeiou' for char in input_string.lower(): if char in vowels: count += 1 return count
Write a function that takes a list of strings as input and returns the longest string in the list.	def find_longest_string(string_list): longest_string = max(string_list, key=len) return longest_string
You are given a list of integers. Write a function to find the second largest number in the list.	def find_second_largest(num_list): if len(num_list) < 2: return None largest = second_largest = float('-inf') for num in num_list: if num > largest: second_largest = largest largest = num elif num > second_largest and num != largest: second_largest = num if second_largest == float('-inf'): return None return second_largest
Write a function to convert a given binary number to decimal.	def binary_to_decimal(binary_num): decimal_num = int(binary_num, 2) return decimal_num
Write a function to find the first duplicate in a given list of integers.	def find_first_duplicate(num_list): seen = set() for num in num_list: if num in seen: return num seen.add(num) return None
Write a Python program to count the number of vowels in each string in a given list of strings.	def count_vowels(lst): vowels = 'aeiouAEIOU' result = [] for string in lst: count = 0 for char in string: if char in vowels: count += 1 result.append(count) return result
Write a Python function that takes a list of integers as input and returns the list with all even numbers doubled.	def double_even_numbers(lst): result = [] for num in lst: if num % 2 == 0: result.append(num * 2) else: result.append(num) return result
You are given a list of strings. Write a function to find the string with the maximum length.	def find_longest_string(lst): longest_string = '' for string in lst: if len(string) > len(longest_string): longest_string = string return longest_string
Write a function that takes a list of numbers as input and returns the sum of all prime numbers in the list.	def sum_of_primes(lst): def is_prime(n): if n <= 1: return False if n == 2: return True if n % 2 == 0: return False sqrt_n = int(n**0.5) + 1 for i in range(3, sqrt_n, 2): if n % i == 0: return False return True prime_sum = 0 for num in lst: if is_prime(num): prime_sum += num return prime_sum
Write a Python function that takes a list of strings as input and returns a new list containing the strings in reverse order.	def reverse_list(lst): return lst[::-1]
Write a function to calculate the factorial of a given integer.	def factorial(n): if n == 0: return 1 else: return n * factorial(n-1)
Write a function that takes a list of strings as input and returns the longest string in the list.	def longest_string(lst): return max(lst, key=len)
Design a function that takes a list of integers as input and returns the count of even numbers in the list.	def count_even_numbers(lst): count = 0 for num in lst: if num % 2 == 0: count += 1 return count
Implement a function to reverse the order of words in a given string. For example, if the input string is "Hello World Python", the output should be "Python World Hello".	def reverse_words(s): words = s.split() return ' '.join(reversed(words))
Write a function that takes a string as input and returns the count of uppercase letters in the string.	def count_uppercase_letters(s): count = 0 for char in s: if char.isupper(): count += 1 return count
Create a class named 'Triangle' with attributes base and height. The class should have an area method that returns the area of the triangle and a circumference method that returns the circumference of the triangle.	class Triangle: def __init__(self, base, height): self.base = base self.height = height def area(self): return 0.5 * self.base * self.height def circumference(self): # assuming base is one side and height is the altitude to that side side1 = self.base side2 = (self.base**2 + self.height**2)**0.5 side3 = (self.base**2 + self.height**2)**0.5 return side1 + side2 + side3
Write a Python function that takes a string as input and returns the string with all vowels removed.	def remove_vowels(s): vowels = 'aeiouAEIOU' return ''.join([char for char in s if char not in vowels])
Create a program that asks the user to input a list of integers and then checks if the list is in ascending order. If it is, the program should print 'Yes', otherwise it should print 'No'.	def check_ascending_order(lst): return lst == sorted(lst) user_input = input("Enter a list of integers separated by space: ") lst = list(map(int, user_input.split())) if check_ascending_order(lst): print('Yes') else: print('No')
Write a function that takes three integers as input and returns the maximum of the three integers. However, if two or more integers are equal, return the string "equal".	def max_of_three(a, b, c): if a == b or a == c or b == c: return "equal" else: return max(a, b, c)
Create a program that asks the user to input a list of numbers and then checks if the list is in descending order. If it is, the program should print 'Yes', otherwise it should print 'No'.	def check_descending_order(lst): return lst == sorted(lst, reverse=True) user_input = input("Enter a list of numbers separated by space: ") lst = list(map(float, user_input.split())) if check_descending_order(lst): print('Yes') else: print('No')
Write a function that takes a list of integers as input and returns the count of numbers greater than the average of the list.	def count_greater_than_average(numbers): avg = sum(numbers) / len(numbers) count = 0 for num in numbers: if num > avg: count += 1 return count
Write a function that takes a string as input and returns the count of vowels in the string, ignoring case sensitivity.	def count_vowels(s): vowels = 'aeiouAEIOU' count = 0 for char in s: if char in vowels: count += 1 return count
Write a function that takes a list of integers as input and returns the product of all the numbers in the list.	def product_of_list(numbers): product = 1 for num in numbers: product *= num return product
Write a function that takes a list of strings as input and returns the list sorted in descending order based on the length of the strings.	def sort_strings_by_length(strings): return sorted(strings, key=len, reverse=True)
Write a function that takes a list of integers as input and returns the count of prime numbers in the list.	def count_prime_numbers(numbers): def is_prime(n): if n <= 1: return False if n <= 3: return True if n % 2 == 0 or n % 3 == 0: return False i = 5 while i * i <= n: if n % i == 0 or n % (i + 2) == 0: return False i += 6 return True count = 0 for num in numbers: if is_prime(num): count += 1 return count
Write a function to find the greatest common divisor of two numbers using the Euclidean algorithm.	def greatest_common_divisor(a, b): while b != 0: a, b = b, a % b return a
Write a function that takes a list of strings as input and returns the string with the maximum length. If there are multiple strings with the same maximum length, return the first one in the list.	def longest_string(lst): return max(lst, key=len)
Write a function that takes a list of lists as input and returns a single list that is the result of flattening the list of lists.	def flatten(lst): result = [] for sublist in lst: result.extend(sublist) return result
Write a function that takes a dictionary as input and returns a new dictionary with the keys and values reversed.	def reverse_dict(d): return {v: k for k, v in d.items()}
Write a function that takes a list of integers as input and returns the count of prime numbers in the list.	def count_primes(lst): def is_prime(n): if n < 2: return False for i in range(2, int(n**0.5) + 1): if n % i == 0: return False return True return sum(1 for num in lst if is_prime(num))
Write a function that takes a list of strings as input and returns the longest string in the list.	def longest_string(lst): return max(lst, key=len)
Write a Python function that takes a list of integers as input and returns the list in descending order.	def sort_descending(lst): return sorted(lst, reverse=True)
Write a function that takes a list of characters as input and returns a boolean indicating whether the list is a palindrome or not.	def is_palindrome(lst): return lst == lst[::-1]
Write a Python function that takes a string as input and returns the string with all occurrences of 'the' changed to 'a'.	def replace_the(s): return s.replace('the', 'a')
Write a function that takes a list of integers as input and returns a dictionary where the keys are the numbers and the values are their squares.	def squares_dict(lst): return {i: i**2 for i in lst}
Given a list of strings, write a function to count the occurrences of the most frequent string in the list.	``` def most_frequent_string(lst): freq_dict = {} for string in lst: if string in freq_dict: freq_dict[string] += 1 else: freq_dict[string] = 1 max_freq = max(freq_dict.values()) return max_freq ```
Write a Python function that takes a list of tuples, where each tuple contains a string and an integer, and returns a new list sorted by the integer value in descending order.	``` def sort_tuples(lst): return sorted(lst, key=lambda x: x[1], reverse=True) ```
Implement a Python function that takes a list of integers as input and returns the index of the first occurrence of the smallest number in the list.	``` def index_of_smallest(lst): return lst.index(min(lst)) ```
Write a function that takes in a list of lists and returns the maximum sum of elements in any inner list.	``` def max_sum_inner_lists(lst): return max(sum(inner_lst) for inner_lst in lst) ```
Given a list of strings, write a function to remove all strings that start with a specific prefix.	``` def remove_strings_with_prefix(lst, prefix): return [string for string in lst if not string.startswith(prefix)] ```
Write a Python function that takes a list of integers as input and returns the second largest number in the list.	def second_largest(lst): lst = list(set(lst)) # remove duplicates lst.sort() if len(lst) < 2: return None return lst[-2]
Write a Python function that takes a string as input and returns the string with all vowels removed.	def remove_vowels(s): vowels = 'aeiouAEIOU' return ''.join([c for c in s if c not in vowels])
Write a Python function that takes a list of strings as input and returns the longest string in the list.	def longest_string(lst): return max(lst, key=len)
Write a Python function that takes two strings as input and returns a boolean indicating whether the second string is a substring of the first string.	def is_substring(s1, s2): return s2 in s1
Write a Python function that takes a list of integers as input and returns a boolean indicating whether the list is sorted in ascending order.	def is_ascending(lst): return all(lst[i] <= lst[i+1] for i in range(len(lst)-1))
Write a function that takes a list of strings as an input and returns a new list that contains the strings with their first and last character swapped. For example, if the input list is ["apple", "banana", "cherry"], the output should be ["elppa", "ananab", "yrrehc"].	def swap_first_last(lst): new_list = [] for word in lst: if len(word) > 1: new_word = word[-1] + word[1:-1] + word[0] new_list.append(new_word) else: new_list.append(word) return new_list
Write a function that takes a list of integers as an input and returns the count of numbers that are divisible by 3 or 5. For example, if the input list is [1, 2, 3, 4, 5, 6, 7, 8], the output should be 4.	def count_divisible(lst): count = 0 for num in lst: if num % 3 == 0 or num % 5 == 0: count += 1 return count
Write a function that takes a string as an input and returns the string with all the characters reversed, but only if the string's length is even. If the string's length is odd, the function should return the original string. For example, if the input string is "hello", the output should be "hello", but if the input string is "hell", the output should be "lleh".	def reverse_even_length(s): if len(s) % 2 == 0: return s[::-1] else: return s
Write a function that takes two integers as an input and returns their greatest common divisor (GCD). For example, if the input integers are 12 and 15, the output should be 3.	def gcd(a, b): while b != 0: a, b = b, a % b return abs(a)
Write a function that takes a list of integers as an input and returns a new list that contains the numbers in the reverse order, but only if the list contains at least one even number. If the list does not contain any even numbers, the function should return the original list. For example, if the input list is [1, 2, 3, 4], the output should be [4, 3, 2, 1], but if the input list is [1, 3, 5, 7]…	def reverse_if_even(lst): if any(num % 2 == 0 for num in lst): return lst[::-1] else: return lst
Write a function that takes a list of integers as input and returns the product of all even numbers in the list.	def product_even_numbers(lst): product = 1 for num in lst: if num % 2 == 0: product *= num return product
Write a function that takes a string as input and returns the number of vowels in the string.	def count_vowels(s): vowels = 'aeiou' count = 0 for char in s.lower(): if char in vowels: count += 1 return count
Write a function that takes a list of integers as input and returns a list of integers that are greater than their adjacent neighbors.	def find_greater_neighbors(lst): greater_neighbors = [] for i in range(1, len(lst) - 1): if lst[i] > lst[i-1] and lst[i] > lst[i+1]: greater_neighbors.append(lst[i]) return greater_neighbors
Write a function that takes a string as input and returns the string with all leading and trailing whitespaces removed.	def remove_whitespace(s): return s.strip()
Write a function that takes a list of integers as input and returns the number of times the largest number appears in the list.	def count_largest_number(lst): largest_number = max(lst) return lst.count(largest_number)
Create a Python function that accepts a list of integers as input and returns the list in sorted order in ascending.	def sort_list(lst): return sorted(lst)
Write a function that takes a list of strings as input and returns the longest string in the list.	def longest_string(lst): return max(lst, key=len)
Implement a function that takes in a list of integers and returns the count of numbers that are divisible by 3.	def count_divisible_by_3(lst): return len([num for num in lst if num % 3 == 0])
Write a function that takes in a list of strings as input and returns a new list containing only the strings that start with a vowel.	def filter_vowel_strings(lst): vowels = 'aeiouAEIOU' return [string for string in lst if string[0] in vowels]
Create a Python function that accepts a list of tuples as input, where each tuple represents a pair of integers, and returns the sum of the second element of each tuple.	def sum_second_elements(lst): return sum(element[1] for element in lst)
Write a function that takes a string as an input and returns the string with all vowels removed.	def remove_vowels(input_string): vowels = 'aeiouAEIOU' return ''.join([char for char in input_string if char not in vowels])
You are given a list of lists where each sublist contains two integers representing a range of numbers (start, end). Write a function that takes this list as an input and returns the total count of numbers between all the ranges.	def count_numbers_in_ranges(ranges): count = 0 for start, end in ranges: count += (end - start + 1) return count
Create a function that takes a list of integers and returns True if the list contains at least one even number, False otherwise.	def has_even_number(numbers): return any(num % 2 == 0 for num in numbers)
You are given a dictionary where the keys are names of students and the values are their corresponding grades. Write a function `find_top_student` that takes this dictionary as an input and returns the name of the student with the highest grade.	def find_top_student(grades): return max(grades, key=grades.get)
Write a function that takes a list of integers as an input and returns a new list with all the elements shifted to the right by one position.	def shift_elements_to_right(numbers): return [numbers[-1]] + numbers[:-1]
Write a function to count the frequency of each character in a string and return a dictionary where the keys are the characters and the values are their frequencies.	def char_frequency(s): freq = {} for char in s: if char in freq: freq[char] += 1 else: freq[char] = 1 return freq
Write a function that takes a list of integers as input and returns the list with all duplicates removed.	def remove_duplicates(lst): return list(set(lst))
Implement a function that takes a string as input and returns the string with all consonants removed.	def remove_consonants(s): vowels = 'aeiouAEIOU' return ''.join(char for char in s if char in vowels)
Write a function that takes a list of strings as input and returns the longest string in the list.	def longest_string(lst): return max(lst, key=len)
Implement a function that takes a string as input and returns the string with all characters reversed.	def reverse_string(s): return s[::-1]
Write a function count_string_positions that takes a list of strings and a target string as input, and returns a dictionary where the keys are the target string and the values are lists of indices where the target string appears in the list of strings.	def count_string_positions(string_list, target_string): result = {target_string: [i for i, string in enumerate(string_list) if string == target_string]} return result
Create a function called classify_numbers that takes a list of numbers as input and returns a dictionary where the keys are the number of digits in the numbers and the values are lists of numbers with corresponding number of digits.	def classify_numbers(numbers): result = {} for num in numbers: num_digits = len(str(num)) if num_digits not in result: result[num_digits] = [num] else: result[num_digits].append(num) return result
Write a function find_most_common_value that takes a dictionary as input where the keys are objects and the values are lists of corresponding values, and returns the key that has the most common value in its list.	def find_most_common_value(input_dict): max_count = 0 max_key = None for key, value_list in input_dict.items(): value_counts = {} for value in value_list: if value not in value_counts: value_counts[value] = 1 else: value_counts[value] += 1 max_value_count = max(value_counts.values()) if max_value_count > max_count: max_count = max_value_count max_key = key return max_key
Create a function called count_characters that takes a string as input and returns a dictionary where the keys are the characters in the string and the values are their corresponding frequencies.	def count_characters(input_string): result = {} for char in input_string: if char not in result: result[char] = 1 else: result[char] += 1 return result
Write a function filter_dict_keys that takes a dictionary as input and a filter function as input, and returns a new dictionary where only the keys that pass the filter function are kept.	def filter_dict_keys(input_dict, filter_func): result = {} for key, value in input_dict.items(): if filter_func(key): result[key] = value return result
Write a Python function that takes a string as an input and returns the longest word in the string.	def longest_word(input_string): words = input_string.split(' ') max_length = max(len(word) for word in words) longest_words = [word for word in words if len(word) == max_length] return longest_words
Implement a Python function that takes a dictionary of student names as keys and their grades as values, and returns a list of students with grades above 90.	def high_achievers(grades_dict): high_achievers_list = [name for name, grade in grades_dict.items() if grade > 90] return high_achievers_list
Create a function that takes a list of strings and returns the string with the maximum number of vowels.	def max_vowels(strings_list): vowels = 'aeiouAEIOU' max_vowels_count = 0 max_vowels_string = '' for string in strings_list: vowels_count = sum(1 for char in string if char in vowels) if vowels_count > max_vowels_count: max_vowels_count = vowels_count max_vowels_string = string return max_vowels_string
Write a Python function that takes a list of integers and returns the second largest number in the list.	def second_largest(numbers_list): numbers_list = list(set(numbers_list)) # remove duplicates numbers_list.sort() if len(numbers_list) < 2: return None else: return numbers_list[-2]
Implement a Python function that takes a list of strings and returns True if all strings in the list start with an uppercase letter, False otherwise.	def all_uppercase(strings_list): return all(string[0].isupper() for string in strings_list)
Write a function to calculate the sum of all odd numbers in a given list of integers.	def sum_of_odd_numbers(numbers): sum = 0 for num in numbers: if num % 2 != 0: sum += num return sum
Develop a Python function that accepts a string as input and returns the count of vowels in the string, ignoring the case of the characters.	def count_vowels(input_string): vowels = 'aeiouAEIOU' count = 0 for char in input_string: if char in vowels: count += 1 return count
Write a Python function that takes two lists of integers as input and returns True if they contain the same elements, regardless of their order.	def lists_have_same_elements(list1, list2): return sorted(list1) == sorted(list2)
Develop a Python function that takes a list of integers as input and returns the second smallest number in the list.	def second_smallest_number(numbers): numbers = list(set(numbers)) # remove duplicates if len(numbers) < 2: return None numbers.sort() return numbers[1]
Write a class called "Circle" with attributes "radius" and methods "area" and "circumference".	import math class Circle: def __init__(self, radius): self.radius = radius def area(self): return math.pi * (self.radius ** 2) def circumference(self): return 2 * math.pi * self.radius
Write a function that takes a list of strings as input and returns the total number of characters in all the strings.	def total_chars(lst): return sum(len(s) for s in lst)
Write a function that takes a list of tuples as input and returns the sum of all the first elements of the tuples.	def sum_first_elements(lst): return sum(x[0] for x in lst)
Write a function that takes a list of strings as input and returns the string that appears most frequently.	def most_frequent_string(lst): freq_dict = {} for s in lst: if s in freq_dict: freq_dict[s] += 1 else: freq_dict[s] = 1 return max(freq_dict, key=freq_dict.get)
Write a function that takes two lists of integers as input and returns a list of integers that are common to both lists.	def common_elements(lst1, lst2): return [x for x in lst1 if x in lst2]
Write a function that takes a list of integers as input and returns the number of integers that are even.	def count_even_numbers(lst): return sum(1 for x in lst if x % 2 == 0)
Write a function that takes a list of strings as input and returns a list of strings with all vowels removed.	def remove_vowels(lst): vowels = 'aeiouAEIOU' return [''.join(c for c in s if c not in vowels) for s in lst]
Write a Python function that takes a list of lists as input, where each sublist contains a pair of numbers representing a range. The function should return a new list with all ranges merged, i.e., if two ranges overlap, they should be merged into one range.	def merge_ranges(ranges): if not ranges: return [] ranges.sort(key=lambda x: x[0]) merged_ranges = [ranges[0]] for current_range in ranges[1:]: last_range = merged_ranges[-1] if current_range[0] <= last_range[1]: merged_ranges[-1] = (last_range[0], max(last_range[1], current_range[1])) else: merged_ranges.append(current_range) return merged_ranges
Create a function that takes a string as input and returns the string with all vowels removed.	def remove_vowels(s): vowels = 'aeiouAEIOU' return ''.join([char for char in s if char not in vowels])
Write a Python function that takes a list of integers as input and returns the second largest value in the list.	def second_largest(nums): nums = list(set(nums)) # remove duplicates if len(nums) < 2: return None nums.sort() return nums[-2]
You are given a dictionary where the keys are names of cities and the values are their corresponding populations. Write a function `find_most_populous_city` that takes this dictionary as an input and returns the name of the most populous city.	def find_most_populous_city(cities): return max(cities, key=cities.get)
Write a Python function that takes a list of strings as input and returns the string that appears most frequently in the list.	def most_frequent_string(strings): frequency = {} for s in strings: if s in frequency: frequency[s] += 1 else: frequency[s] = 1 max_freq = max(frequency.values()) most_frequent_strings = [s for s, freq in frequency.items() if freq == max_freq] return most_frequent_strings[0] if most_frequent_strings else None
Write a function that takes in a list of strings and returns the longest string in the list.	def find_longest_string(lst): longest_str = max(lst, key=len) return longest_str
You are given a list of integers. Write a function to find the count of all the prime numbers in the list.	def count_primes(lst): def is_prime(n): if n < 2: return False for i in range(2, int(n**0.5) + 1): if n % i == 0: return False return True count = 0 for num in lst: if is_prime(num): count += 1 return count
Write a function that calculates the sum of all the digits in a given number.	def sum_of_digits(n): return sum(int(digit) for digit in str(n))
Implement a Python function that checks if a given number is an armstrong number or not. The function should return True if the number is an armstrong number and False otherwise.	def is_armstrong(n): digits = [int(d) for d in str(n)] power = len(digits) sum_of_cubes = sum(d**power for d in digits) return n == sum_of_cubes
Write a function that takes in a list of integers and returns the count of all the numbers that are greater than the average of the list.	def count_greater_than_average(lst): average = sum(lst) / len(lst) count = 0 for num in lst: if num > average: count += 1 return count
Implement a Python function that takes a list of integers as input and returns a new list where each element is the square of the corresponding element in the input list.	def square_elements(lst): return [i ** 2 for i in lst]
Write a Python program that takes a list of strings as input and returns the longest string in the list.	def longest_string(lst): return max(lst, key=len)
Write a Python function that takes two lists of integers as input and returns a new list containing the pairwise sum of elements from the input lists.	def pairwise_sum(lst1, lst2): return [a + b for a, b in zip(lst1, lst2)]
Implement a Python function that takes a list of strings as input and returns a new list containing only the strings that start with a vowel.	def strings_starting_with_vowel(lst): vowels = 'aeiouAEIOU' return [s for s in lst if s[0] in vowels]
Write a Python program that takes a list of integers as input and returns the percentage of even numbers in the list.	def even_numbers_percentage(lst): even_count = len([i for i in lst if i % 2 == 0]) return (even_count / len(lst)) * 100
Create a function that takes a string as input and returns the string with all vowels removed.	def remove_vowels(input_str): vowels = 'aeiouAEIOU' return ''.join([char for char in input_str if char not in vowels])
You are given a list of integers and a target integer. Write a function that returns the index of the first occurrence of the target integer in the list.	def find_index(input_list, target): for i, num in enumerate(input_list): if num == target: return i return -1 # return -1 if the target is not found
Write a function that takes a list of strings as input and returns a new list that contains the length of each string.	def string_lengths(input_list): return [len(string) for string in input_list]
Create a function that takes a dictionary as input and returns a new dictionary with the keys and values swapped.	def swap_dict(input_dict): return {v: k for k, v in input_dict.items()}
Write a function that takes a list of integers as input and returns True if the list contains a pair of duplicate elements, and False otherwise.	def has_duplicates(input_list): return len(input_list) != len(set(input_list))
Write a Python function to count the occurrence of a specific character in a given string.	def count_character_occurrence(s, char): count = 0 for c in s: if c == char: count += 1 return count
Develop a Python function that takes a list of integers as input and returns the index of the first occurrence of the maximum value.	def find_max_index(lst): max_val = max(lst) return lst.index(max_val)
Implement a Python function that accepts a list of strings as input and returns the string with the minimum length.	def find_min_length_string(lst): return min(lst, key=len)
Write a Python function that takes a positive integer as input and returns its square root.	def calculate_square_root(n): if n < 0: return "Error: Input should be a positive integer" return n ** 0.5
Develop a Python function that takes a list of integers as input and returns the sum of the squares of all the numbers in the list.	def sum_of_squares(lst): return sum(i ** 2 for i in lst)
Create a program that asks the user to input a number and then checks if the number is even or odd. If it's even, the program should print 'Even', otherwise it should print 'Odd'.	def check_even_or_odd(): num = int(input("Enter a number: ")) if num % 2 == 0: return 'Even' else: return 'Odd' print(check_even_or_odd())
Write a function that takes a list as an input and returns the sum of all the numbers in the list.	def sum_list_elements(lst): return sum(lst) numbers = [1, 2, 3, 4, 5] print(sum_list_elements(numbers))
Create a program that asks the user for their favorite color and then prints out a message with their favorite color.	def get_favorite_color(): color = input("Enter your favorite color: ") return f"Your favorite color is {color}." print(get_favorite_color())
Write a Python function that takes a string as an input and returns the string in uppercase.	def uppercase_string(s): return s.upper() print(uppercase_string("hello world"))
Write a function that takes two lists as inputs and returns the intersection of the two lists.	def intersection_of_lists(lst1, lst2): return [element for element in lst1 if element in lst2] list1 = [1, 2, 3, 4, 5] list2 = [4, 5, 6, 7, 8] print(intersection_of_lists(list1, list2))
Develop a Python function that accepts a list of strings as input and returns the longest string in the list, considering only strings that contain at least one alphabet character. For instance, if the input is ["123", "abc", "xyz789", "456", "pqrstu"], the output should be "pqrstu".	def longest_string_with_alphabet(lst): longest_str = "" for string in lst: if any(char.isalpha() for char in string) and len(string) > len(longest_str): longest_str = string return longest_str
Write a function that takes a list of integers as input and returns a list of their squares if the number is even, and the cube of the number if it's odd.	def squares_and_cubes(numbers): result = [] for num in numbers: if num % 2 == 0: result.append(num ** 2) else: result.append(num ** 3) return result
Write a function that takes a string as input and returns the count of words that start with a vowel.	def count_vowel_words(sentence): vowels = "aeiou" words = sentence.split() count = 0 for word in words: if word[0].lower() in vowels: count += 1 return count
Write a function that takes a list of integers as input and returns the sum of all prime numbers in the list.	def sum_of_primes(numbers): def is_prime(n): if n <= 1: return False for i in range(2, int(n ** 0.5) + 1): if n % i == 0: return False return True prime_sum = 0 for num in numbers: if is_prime(num): prime_sum += num return prime_sum
Write a function that takes a list of strings as input and returns the count of strings that contain exactly three 'a's.	def count_strings_with_three_as(strings): count = 0 for string in strings: if string.count('a') == 3: count += 1 return count
Write a function in Python to convert a given binary number to decimal.	``` def binary_to_decimal(binary): return int(binary, 2) ```
You need to write a Python function that takes a list of strings as input and returns a new list that contains only the strings with more than 5 characters.	``` def filter_long_strings(string_list): return [s for s in string_list if len(s) > 5] ```
Write a function called calculate_average_speed that takes a list of tuples, where each tuple represents a time and a distance. The function should return the average speed.	``` def calculate_average_speed(time_distance_list): total_distance = sum(distance for _, distance in time_distance_list) total_time = sum(time for time, _ in time_distance_list) return total_distance / total_time ```
Write a function that takes a list of integers as input and returns the maximum product of two numbers in the list.	``` def max_product(nums): nums.sort() return max(nums[-1] * nums[-2], nums[0] * nums[1]) ```
Write a function that takes a string as input and returns the string with all digits removed.	``` def remove_digits(s): return ''.join(c for c in s if not c.isdigit()) ```
Implement a class called `Rectangle` with attributes `length`, `width`, and methods `area` and `perimeter`. The `area` method should return the area of the rectangle, and the `perimeter` method should return the perimeter of the rectangle.	``` class Rectangle: def __init__(self, length, width): self.length = length self.width = width def area(self): return self.length * self.width def perimeter(self): return 2 * (self.length + self.width) ```
Create a Python function that takes a string as input and returns the string in uppercase.	``` def uppercase_string(s): return s.upper() ```
Write a Python function that takes a list of strings as input and returns the count of the number of strings that start with a specific character.	``` def count_starting_strings(lst, char): return sum(1 for s in lst if s[0].lower() == char.lower()) ```
Implement a Python function called `sort_list` that takes a list of integers as input and returns a new list with the integers sorted in descending order.	``` def sort_list(lst): return sorted(lst, reverse=True) ```
Write a Python function that takes a string as input and returns the count of the number of vowels in the string.	``` def count_vowels(s): vowels = 'aeiou' return sum(1 for char in s.lower() if char in vowels) ```
Write a function that takes a string as input and returns the string with all vowels removed.	def remove_vowels(s): vowels = 'aeiouAEIOU' return ''.join([char for char in s if char not in vowels])
Write a function to find the first duplicate in a list of numbers.	def find_first_duplicate(lst): seen = set() for num in lst: if num in seen: return num seen.add(num) return None
Write a function that takes a list of integers as input and returns the count of all even numbers in the list.	def count_even_numbers(lst): return len([num for num in lst if num % 2 == 0])
Write a function to find the second largest number in a list of numbers.	def find_second_largest(lst): if len(lst) < 2: return None lst = list(set(lst)) # remove duplicates lst.sort() return lst[-2]
Write a function that takes a list of strings as input and returns a list of strings that are longer than three characters.	def filter_long_strings(lst): return [s for s in lst if len(s) > 3]
Write a function that takes a list of numbers as input and returns the sum of squares of all numbers in the list.	def sum_of_squares(numbers): return sum(num ** 2 for num in numbers)
Write a function that takes a string as input, and returns a boolean indicating whether the string is a palindrome.	def is_palindrome(s): return s == s[::-1]
Write a function that takes a list of lists as input, and returns a list of all unique elements in the sublists.	def unique_elements(lists): unique = set() for lst in lists: unique.update(lst) return list(unique)
Write a function that takes a dictionary as input, and returns a new dictionary where the keys and values are swapped.	def swap_dict(d): return {v: k for k, v in d.items()}
Write a function that takes a list of strings as input, and returns a string that is the concatenation of all strings in the list, separated by a comma.	def concatenate_strings(strings): return ', '.join(strings)
Write a Python function to find the sum of the squares of the first n natural numbers.	def sum_of_squares(n): sum = 0 for i in range(1, n + 1): sum += i ** 2 return sum
Write a Python function to find the maximum and minimum values in a given list of integers.	def find_max_min(lst): if len(lst) == 0: return None max_val = max(lst) min_val = min(lst) return max_val, min_val
Write a Python function that takes a list of strings as input and returns a new list containing only the strings that have more than 5 characters.	def filter_strings(lst): new_lst = [s for s in lst if len(s) > 5] return new_lst
Write a function that takes a list of integers as input and returns a new list containing only the integers that are divisible by 3.	def filter_divisible_by_3(lst): new_lst = [x for x in lst if x % 3 == 0] return new_lst
Write a Python function that takes a string as input and returns the string in reverse order.	def reverse_string(s): return s[::-1]
Write a Python function that takes a list of integers as input and returns the count of even numbers in the list.	def count_even_numbers(lst): count = 0 for num in lst: if num % 2 == 0: count += 1 return count
Write a Python function that takes a string as input and returns the number of vowels in the string.	def count_vowels(s): vowels = "aeiou" count = 0 for char in s.lower(): if char in vowels: count += 1 return count
Develop a Python program that takes a dictionary of book titles as keys and their corresponding prices as values, and returns the total cost of a list of book titles.	def calculate_total_cost(book_prices, book_titles): total_cost = 0 for title in book_titles: if title in book_prices: total_cost += book_prices[title] return total_cost
Given a list of strings, write a function that returns the longest string in the list.	def find_longest_string(lst): longest_str = "" for s in lst: if len(s) > len(longest_str): longest_str = s return longest_str
Write a Python function that takes a list of integers as input and returns the second smallest number in the list.	def find_second_smallest(lst): lst = list(set(lst)) # remove duplicates lst.sort() if len(lst) < 2: return None return lst[1]
Write a function that calculates the sum of all the digits in a given integer.	def sum_digits(n): return sum(int(digit) for digit in str(n))
Write a Python function that takes a list of integers as input and returns a new list with only the even numbers.	def filter_even_numbers(lst): return [num for num in lst if num % 2 == 0]
Write a function that takes a string as input and returns the string with all occurrences of a specific word replaced with another word.	def replace_word(s, old_word, new_word): return s.replace(old_word, new_word)
Write a Python function that takes a list of integers as input and returns the second largest number in the list.	def second_largest(lst): if len(lst) < 2: return None lst = list(set(lst)) # remove duplicates lst.sort() return lst[-2]
Write a function that takes a date string in the format 'YYYY-MM-DD' and returns the day of the week for that date.	import datetime def get_day_of_week(date_str): dt = datetime.datetime.strptime(date_str, '%Y-%m-%d') return dt.strftime('%A')
Write a function that takes in a list of strings and returns the string with the longest length.	def longest_string(lst): longest = max(lst, key=len) return longest
Write a function that takes in a dictionary and returns the key with the lowest value.	def lowest_value_key(d): return min(d, key=d.get)
Write a Python function that takes a list of integers as input and returns the list sorted in ascending order.	def sort_list(lst): return sorted(lst)
Write a Python function that takes two lists of integers as input and returns the intersection of the two lists.	def intersection(lst1, lst2): return list(set(lst1) & set(lst2))
Write a Python function that takes a string as input and returns the string with all vowels removed.	def remove_vowels(s): vowels = 'aeiouAEIOU' return ''.join([ch for ch in s if ch not in vowels])
Write a Python program to count the number of words in a given string.	def count_words(input_string): words = input_string.split() return len(words)
Create a Python function that takes in a list of integers and returns a list of their absolute values.	def absolute_values(numbers): return [abs(i) for i in numbers]
Write a Python function to find the maximum frequency of any element in a list.	def max_frequency(lst): freq_dict = {} for item in lst: if item in freq_dict: freq_dict[item] += 1 else: freq_dict[item] = 1 return max(freq_dict.values())
Write a Python program to find the factorial of a given number using recursion.	def factorial(n): if n == 0 or n == 1: return 1 else: return n * factorial(n-1)
Write a Python function that takes in a string and returns the string with all vowels removed.	def remove_vowels(input_string): vowels = 'aeiouAEIOU' return ''.join([char for char in input_string if char not in vowels])
Create a function that takes a dictionary as input and returns the sum of all values in the dictionary.	def sum_dict_values(dictionary): return sum(dictionary.values())
Write a Python function that takes a list of strings as input and returns a list of all strings with lengths of 5 characters or more.	def filter_strings(lst): return [s for s in lst if len(s) >= 5]
Implement a function that takes two lists as input and returns a list of elements that are common to both lists.	def common_elements(lst1, lst2): return [element for element in lst1 if element in lst2]
Create a function that takes a string as input and returns the string with all vowels removed.	def remove_vowels(s): vowels = 'aeiouAEIOU' return ''.join([char for char in s if char not in vowels])
Write a Python function that takes a list of integers as input and returns the average of all numbers in the list.	def average_numbers(lst): return sum(lst) / len(lst)
Design a function that takes a list of integers and returns the longest monotonically increasing subsequence length.	def longest_increasing_subsequence(sequence): if len(sequence) == 0: return 0 lengths = [1] * len(sequence) for i in range(1, len(sequence)): for j in range(i): if sequence[i] > sequence[j]: lengths[i] = max(lengths[i], lengths[j] + 1) return max(lengths)
Write a function that takes a string as input and returns the string with all the characters in uppercase and digits replaced with their corresponding alphabetic characters, where 0 is replaced with 'a', 1 is replaced with 'b', and so on.	def replace_digits_with_chars(input_string): alphabet = 'abcdefghijklmnopqrstuvwxyz' result = '' for char in input_string: if char.isdigit(): index = int(char) result += alphabet[index] else: result += char.upper() return result
You are given a list of lists where each sublist contains two elements, a name and an age. Write a function that returns the average age of all the people in the list.	def average_age(people_list): total_age = 0 for person in people_list: total_age += person[1] return total_age / len(people_list)
Design a function that takes a string as input and returns the string with all the occurrences of the substring 'not' replaced with 'NOT', unless the substring is followed by 'bad'.	def replace_not_with_NOT(input_string): result = '' i = 0 while i < len(input_string): if input_string[i:i+3] == 'not' and i+3 < len(input_string) and input_string[i+3:i+6] == 'bad': result += 'not' i += 3 elif input_string[i:i+3] == 'not': result += 'NOT' i += 3 else: result += input_string[i] i += 1 return result
Write a function that takes a list of integers and returns the sum of all the prime numbers in the list.	def sum_of_primes(numbers): def is_prime(n): if n < 2: return False for i in range(2, int(n**0.5) + 1): if n % i == 0: return False return True return sum(num for num in numbers if is_prime(num))
Write a function that takes two integers as input, and returns their greatest common divisor (GCD).	def gcd(a, b): while b != 0: a, b = b, a % b return a
Write a function that takes a list of integers as input, and returns a new list with all duplicate elements removed.	def remove_duplicates(lst): return list(set(lst))
Write a function that takes a string as input, and returns the string in reverse order.	def reverse_string(s): return s[::-1]
Write a class named 'Circle' with attributes radius. The class should have an area method that returns the area of the circle and a circumference method that returns the circumference of the circle.	import math class Circle: def __init__(self, radius): self.radius = radius def area(self): return math.pi * self.radius ** 2 def circumference(self): return 2 * math.pi * self.radius
Write a function that takes a list of strings as input, and returns a new list with all strings converted to uppercase.	def uppercase_strings(lst): return [s.upper() for s in lst]
Write a Python function to count the number of words in a given string.	def count_words(input_string): words = input_string.split() return len(words)
Write a Python function to compute the square root of a given number.	import math def compute_square_root(num): if num < 0: return "Error: Square root of negative number" return math.sqrt(num)
You are given a list of strings as input. Write a function that takes this list as an argument and returns the longest string in the list.	def longest_string(lst): return max(lst, key=len)
You are given a list of integers as input. Write a function that takes this list as an argument and returns a sorted list in descending order.	def generate_fibonacci(n): fib_sequence = [] a, b = 0, 1 while len(fib_sequence) < n: fib_sequence.append(a) a, b = b, a + b return fib_sequence
Write a Python function that takes a list of integers as input and returns the count of elements that are greater than or equal to their index.	def count_greater_or_equal(lst): count = 0 for i, num in enumerate(lst): if num >= i: count += 1 return count
Write a function that takes a string as input and returns True if the string contains at least one vowel, False otherwise.	def has_vowel(s): vowels = 'aeiouAEIOU' for char in s: if char in vowels: return True return False
Write a function that takes a list of integers as input and returns the sum of the absolute differences between each pair of adjacent elements.	def sum_of_adjacent_differences(lst): sum_diff = 0 for i in range(1, len(lst)): sum_diff += abs(lst[i] - lst[i-1]) return sum_diff
Write a Python function that takes a string as input and returns the reverse of the string, but only for alphabetic characters, leaving the rest unchanged.	def reverse_alphabetic_chars(s): alphabetic_chars = [char for char in s if char.isalpha()] reversed_chars = alphabetic_chars[::-1] result = '' alphabetic_index = 0 for char in s: if char.isalpha(): result += reversed_chars[alphabetic_index] alphabetic_index += 1 else: result += char return result
Write a function that takes a list of integers as input and returns the maximum sum of a contiguous subarray.	def max_sum_subarray(lst): max_sum = float('-inf') current_sum = 0 for num in lst: current_sum = max(num, current_sum + num) max_sum = max(max_sum, current_sum) return max_sum
Write a function to calculate the average of a list of numbers, ignoring non-numeric values.	def calculate_average(lst): numeric_values = [num for num in lst if isinstance(num, (int, float))] if len(numeric_values) == 0: return 0 return sum(numeric_values) / len(numeric_values)
Write a function that takes a string and returns a dictionary where the keys are the characters in the string and the values are their frequencies.	def char_frequency(str): freq_dict = {} for char in str: if char in freq_dict: freq_dict[char] += 1 else: freq_dict[char] = 1 return freq_dict
Create a function that sorts a list of tuples based on their second element.	def sort_tuples(lst): return sorted(lst, key=lambda x: x[1])
Write a function to find all pairs of integers in a list that have a difference of 2.	def find_pairs(lst): pairs = [] for i in range(len(lst)): for j in range(i+1, len(lst)): if abs(lst[i] - lst[j]) == 2: pairs.append((lst[i], lst[j])) return pairs
Write a function that takes a list of strings and returns the string that appears most frequently.	def most_frequent_string(lst): freq_dict = {} for string in lst: if string in freq_dict: freq_dict[string] += 1 else: freq_dict[string] = 1 max_freq = max(freq_dict.values()) most_frequent = [string for string, freq in freq_dict.items() if freq == max_freq] return most_frequent[0]
Write a function that takes two strings as input and returns a new string that contains only the characters that are common to both strings.	``` def common_chars(str1, str2): common = set(str1) & set(str2) return ''.join(common) ```
Write a function that takes a list of integers as input and returns the index of the first occurrence of the minimum value in the list.	``` def min_index(lst): return lst.index(min(lst)) ```
Design a Python function that accepts a list of dictionaries as input where each dictionary contains a person's name and their corresponding age. The function should return a dictionary where the keys are the person names and the values are their ages.	``` def ages_dict(lst): return {person['name']: person['age'] for person in lst} ```
Create a function that takes in a list of strings as input and checks if all the strings in the list are of the same length. The function should return True if all strings are of the same length, and False otherwise.	``` def same_length(lst): length = len(lst[0]) return all(len(s) == length for s in lst) ```
Write a Python function that takes two lists of floating-point numbers as input and returns the mean of the absolute differences between corresponding elements in the two lists.	``` def mean_absolute_diff(lst1, lst2): return sum(abs(a - b) for a, b in zip(lst1, lst2)) / len(lst1) ```
Create a function that takes a string as input and returns the string with all vowels removed.	``` def remove_vowels(s): vowels = 'aeiouAEIOU' return ''.join([c for c in s if c not in vowels]) ```
Write a function that takes a list of integers as input and returns a sorted list of all the unique elements in the list.	``` def unique_elements(lst): return sorted(set(lst)) ```
Create a function that takes a list of dictionaries as input, where each dictionary contains information about a person such as name, age, and occupation. The function should return a new list of dictionaries where all dictionaries are sorted by the person's age in descending order.	``` def sort_by_age(lst): return sorted(lst, key=lambda x: x['age'], reverse=True) ```
Write a function that takes a list of strings as input and returns a new list containing the strings that start with a capital letter.	``` def start_with_capital(lst): return [s for s in lst if s[0].isupper()] ```
Create a function that takes a dictionary as input, where the keys are the names of cities and the values are the populations of the cities. The function should return the name of the city with the highest population.	``` def highest_population_city(population_dict): return max(population_dict, key=population_dict.get) ```
Write a Python function to find the longest common prefix among a list of strings.	def longest_common_prefix(lst): if not lst: return "" prefix = lst[0] for string in lst[1:]: while not string.startswith(prefix): prefix = prefix[:-1] return prefix
Write a Python function to sort a dictionary by its keys in descending order and return a new dictionary.	def sort_dict_by_keys(descending, dictionary): sorted_dict = {k: v for k, v in sorted(dictionary.items(), reverse=descending)} return sorted_dict
Write a Python function that takes a list of names and a list of ages as input and returns a dictionary where the keys are the names and the values are the ages.	def create_age_dict(names, ages): age_dict = {} for i in range(len(names)): age_dict[names[i]] = ages[i] return age_dict
Write a Python function to find the maximum sum of a subarray within a given list of integers.	def max_subarray_sum(lst): max_sum = float('-inf') current_sum = 0 for num in lst: current_sum = max(num, current_sum + num) max_sum = max(max_sum, current_sum) return max_sum
Write a Python function to find all unique permutations of a given string.	def unique_permutations(s): if len(s) == 1: return [s] result = set() for i in range(len(s)): char = s[i] remaining = s[:i] + s[i+1:] for perm in unique_permutations(remaining): result.add(char + perm) return list(result)
Write a function that takes a string as input and returns the string with all uppercase letters changed to lowercase and all lowercase letters changed to uppercase.	def swap_case(s): result = "" for char in s: if char.isupper(): result += char.lower() else: result += char.upper() return result
Implement a function to calculate the area of a circle given its radius.	import math def circle_area(radius): return math.pi * (radius ** 2)
Given a list of integers, write a function that returns a new list containing the elements in reverse order without modifying the original list.	def reverse_list(lst): return lst[::-1]
Write a function that takes a string as input and returns the string with all digits removed.	def remove_digits(s): return ''.join(c for c in s if not c.isdigit())
Implement a function that takes a list of strings as input and returns a new list containing the strings in sorted order.	def sort_strings(lst): return sorted(lst)
Write a function that takes a list of integers as input and returns a new list that contains only the even numbers from the original list.	def get_even_numbers(nums): even_nums = [] for num in nums: if num % 2 == 0: even_nums.append(num) return even_nums
Write a Python function to calculate the average of all the elements in a given list.	def calculate_average(nums): if len(nums) == 0: return 0 return sum(nums) / len(nums)
Write a function that takes a string as input and returns the string in uppercase.	def to_uppercase(s): return s.upper()
Implement a Python program that takes a list of strings as input and returns the list sorted in alphabetical order.	def sort_strings(alist): return sorted(alist)
Write a Python function that takes a list of integers as input and returns the list sorted in ascending order.	def sort_list(alist): return sorted(alist)
Write a function to count the number of occurrences of a specific word in a given list of strings.	def count_word_occurrences(lst, word): count = 0 for string in lst: words = string.split() for w in words: if w.lower() == word.lower(): count += 1 return count
Create a function that takes a list of integers and returns the second smallest number in the list.	def second_smallest(lst): lst = list(set(lst)) # remove duplicates lst.sort() if len(lst) < 2: return None return lst[1]
Write a function that takes a string as an input and returns True if the string is a palindrome, False otherwise.	def is_palindrome(s): s = s.replace(" ", "").lower() # remove spaces and convert to lowercase return s == s[::-1]
Create a function that takes a list of integers as input and returns the number of pairs of integers that have a difference of 2.	def count_pairs_difference_2(lst): count = 0 for i in range(len(lst)): for j in range(i + 1, len(lst)): if abs(lst[i] - lst[j]) == 2: count += 1 return count
Write a function that takes a list of integers as input and returns the longest sequence of consecutive integers.	def longest_consecutive_sequence(lst): longest_sequence = [] current_sequence = [] for num in sorted(lst): if not current_sequence or num == current_sequence[-1] + 1: current_sequence.append(num) else: if len(current_sequence) > len(longest_sequence): longest_sequence = current_sequence current_sequence = [num] if len(current_sequence) > len(longest_sequence): longest_sequence = current_sequence …
Write a function that takes a list of floats as input and returns the average of all the numbers in the list. If the list is empty, return None.	def average_of_list(lst): if not lst: return None return sum(lst) / len(lst)
Create a Python function that takes a string as input. The function should return a new string where the first and last characters are swapped.	def swap_characters(s): if len(s) < 2: return s return s[-1] + s[1:-1] + s[0]
Write a function that takes a list of strings as input and returns the longest string in the list. If the list is empty, return None.	def longest_string(lst): if not lst: return None return max(lst, key=len)
Write a Python function that takes a dictionary as input. The function should swap the keys and values of the dictionary and return the new dictionary.	def swap_dict(d): return {v: k for k, v in d.items()}
Create a Python function that takes a list of integers as input. The function should return a new list with only the even numbers from the original list.	def get_even_numbers(lst): return [num for num in lst if num % 2 == 0]
Given a list of integers and a target sum, return the list of pairs of indices of the list that sum up to the target sum.	def find_indices(nums, target): num_dict = {} for i, num in enumerate(nums): complement = target - num if complement in num_dict: return [[num_dict[complement], i]] num_dict[num] = i return []
Write a function that takes a list of lists as input and returns a list of the frequencies of each sublist.	from collections import Counter def sublist_frequencies(lists): return list(Counter(tuple(sublist) for sublist in lists).values())
Write a function that takes a string as input and returns the number of substrings that start and end with the same character.	def count_same_end_chars(s): count = 0 for i in range(len(s)): for j in range(i+1, len(s)+1): if s[i] == s[j-1]: count += 1 return count
Implement a function that takes a list of integers as input and returns the maximum absolute difference between any two elements in the list.	def max_absolute_diff(nums): return max(nums) - min(nums)
Write a function that takes a list of strings as input and returns the list of strings that contain at least one vowel.	def contains_vowel(strings): vowels = 'aeiou' return [s for s in strings if any(c in vowels for c in s.lower())]
Design a function that calculates the average value of a list of integers.	def calculate_average(numbers): return sum(numbers) / len(numbers)
Implement a function that takes a list of numbers and returns the count of even numbers in the list.	def count_even_numbers(numbers): count = 0 for num in numbers: if num % 2 == 0: count += 1 return count
Create a function that finds the maximum value in a list of integers.	def find_max_value(numbers): return max(numbers)
Develop a function that checks if a given string contains exactly three vowels.	def has_exactly_three_vowels(s): vowels = 'aeiou' count = 0 for char in s.lower(): if char in vowels: count += 1 return count == 3
Write a function that takes a list of strings and returns a new list where each string is converted to uppercase.	def convert_to_uppercase(strings): return [s.upper() for s in strings]
Write a function that calculates the average of all the numbers in a list of integers.	def average_of_list(lst): return sum(lst) / len(lst)
You are given a string that contains parentheses. Write a program to verify whether the string has balanced parentheses.	def balanced_parentheses(s): stack = [] for char in s: if char == '(': stack.append(char) elif char == ')': if not stack: return False stack.pop() return not stack
Write a function that takes in a list of integers and returns the maximum difference between any two elements in the list.	def max_difference(lst): return max(lst) - min(lst)
You are given a list of strings. Write a program to sort the list in descending order of the lengths of the strings.	def sort_strings_by_length(lst): return sorted(lst, key=len, reverse=True)
Write a function that takes in a list of integers and returns the count of all the prime numbers in the list.	def count_prime_numbers(lst): def is_prime(n): if n < 2: return False for i in range(2, int(n ** 0.5) + 1): if n % i == 0: return False return True return sum(1 for num in lst if is_prime(num))
Write a Python function that takes a list of strings as input and returns the longest string in the list.	def longest_string(lst): return max(lst, key=len)
Create a Python function that calculates the median of a list of numbers.	def calculate_median(lst): lst.sort() n = len(lst) if n % 2 == 0: median = (lst[n//2 - 1] + lst[n//2]) / 2 else: median = lst[n//2] return median
Develop a Python function that takes a string as input and returns the count of all vowels in the string.	def count_vowels(s): s = s.lower() vowels = 'aeiou' count = 0 for char in s: if char in vowels: count += 1 return count
Write a Python function that takes a list of integers as input and returns the count of all prime numbers in the list.	def count_primes(lst): def is_prime(n): if n < 2: return False for i in range(2, int(n**0.5) + 1): if n % i == 0: return False return True count = 0 for num in lst: if is_prime(num): count += 1 return count
Create a Python function that takes a dictionary as input and returns the key with the maximum value.	def max_key(d): return max(d, key=d.get)
Write a function that takes a string as input and returns the string with all vowels removed.	def remove_vowels(input_string): vowels = "aeiouAEIOU" new_string = "" for char in input_string: if char not in vowels: new_string += char return new_string
Create a class called Rectangle that has attributes for the length and width. The class should have methods to calculate the area and perimeter of the rectangle.	class Rectangle: def __init__(self, length, width): self.length = length self.width = width def calculate_area(self): return self.length * self.width def calculate_perimeter(self): return 2 * (self.length + self.width)
Define a function `count_even_numbers` that takes a list of integers as input and returns the count of even numbers in the list.	def count_even_numbers(input_list): count = 0 for num in input_list: if num % 2 == 0: count += 1 return count
Write a Python function that takes a dictionary as input and returns a new dictionary with the keys and values swapped.	def swap_dict(input_dict): new_dict = {} for key, value in input_dict.items(): new_dict[value] = key return new_dict
Create a function that takes a list of strings as input and returns the list sorted in alphabetical order.	def sort_strings(input_list): return sorted(input_list)
Write a function that takes a list of strings as input and returns the longest string in the list.	def longest_string(lst): return max(lst, key=len)
Create a function that takes two lists of integers as input and returns a list of integers that appear in both lists.	def common_elements(lst1, lst2): return [element for element in lst1 if element in lst2]
Develop a Python class called "Rectangle" with two attributes "width" and "height" and a method "area" that returns the area of the rectangle.	class Rectangle: def __init__(self, width, height): self.width = width self.height = height def area(self): return self.width * self.height
Write a function that takes an integer as input and returns the sum of its digits.	def sum_digits(n): return sum(int(digit) for digit in str(n))
Create a function that takes a 3D list of integers as input and returns the average value of all integers in the list.	def average_value(lst): total = sum(element for sublist in lst for subsublist in sublist for element in subsublist) count = sum(len(subsublist) for sublist in lst for subsublist in sublist) return total / count
Write a function that takes a list of strings as input and returns the string with the maximum length.	def find_longest_string(lst): longest_str = max(lst, key=len) return longest_str
Write a function that takes in a list of integers and returns the product of all odd numbers in the list.	def product_of_odd_numbers(lst): product = 1 for num in lst: if num % 2 != 0: product *= num return product
Given a list of integers, write a function that returns True if the list contains at least one 7 and False otherwise.	def has_seven(lst): return 7 in lst
Write a function that takes in a list of integers and returns a new list containing only the numbers that are greater than the average of the original list.	def numbers_greater_than_average(lst): avg = sum(lst) / len(lst) greater_than_avg = [num for num in lst if num > avg] return greater_than_avg
Write a function that takes in a string as input and returns True if the string starts with 'a' and ends with 'd', and False otherwise.	def starts_with_a_ends_with_d(s): return s.startswith('a') and s.endswith('d')
Write a function that takes a list of integers and returns the list with duplicates removed.	def remove_duplicates(lst): return list(set(lst))
Write a function that takes two lists of strings as input and returns a new list that contains only the elements that are not common to both lists.	def uncommon_elements(lst1, lst2): set1 = set(lst1) set2 = set(lst2) uncommon = (set1 - set2) | (set2 - set1) return list(uncommon)
Write a function that takes a string as input and returns the string with all vowels removed.	def remove_vowels(s): vowels = 'aeiouAEIOU' return ''.join([char for char in s if char not in vowels])
Write a function that takes a list of strings as input and returns the string that has the maximum length.	def longest_string(lst): return max(lst, key=len)
Write a function that takes a list of integers as input and returns the list with all negative numbers removed.	def remove_negative_numbers(lst): return [num for num in lst if num >= 0]
Write a Python function to find the maximum product of three numbers in a list of integers.	def max_product(lst): lst.sort() return max(lst[-1] * lst[-2] * lst[-3], lst[0] * lst[1] * lst[-1]) return;
Write a Python program to check if a given string is palindrome, ignoring the case and non-alphanumeric characters.	def is_palindrome(s): s = ''.join(e for e in s if e.isalnum()).lower() return s == s[::-1] return;
Write a Python function to find all pairs of numbers in a list that add up to a given target sum.	def find_pairs(lst, target_sum): pairs = [] seen = set() for num in lst: complement = target_sum - num if complement in seen: pairs.append((complement, num)) seen.add(num) return pairs return;
Write a Python function to extract all URLs from a given string.	import re def extract_urls(s): pattern = r'http[s]?://(?:[a-zA-Z]|[0-9]|[$-_@.&+]|[!*\\(\\),]|(?:%[0-9a-fA-F][0-9a-fA-F]))+' return re.findall(pattern, s) return;
Write a Python function to reverse the order of words in a given string.	def reverse_words(s): words = s.split() return ' '.join(words[::-1]) return;
You are given a dictionary where the keys are strings and the values are lists of integers. You need to write a Python function that returns a dictionary where the keys are the same, but the values are the average of the integers in the lists.	def calculate_averages(dict_): averages = {} for key, values in dict_.items(): averages[key] = sum(values) / len(values) return averages
You are given a list of lists where each inner list contains two strings representing a name and an email address. You need to write a Python function that returns a dictionary where the keys are the email addresses and the values are the corresponding names.	def email_to_name(list_): email_dict = {} for name, email in list_: email_dict[email] = name return email_dict
You are given a string of parentheses and you need to write a Python function that checks if the parentheses are balanced, i.e., every opening parenthesis has a corresponding closing parenthesis and vice versa. If the parentheses are balanced, the function should return True, otherwise it should return False.	def is_balanced(s): stack = [] for char in s: if char == '(': stack.append(char) elif char == ')': if not stack: return False stack.pop() return not stack
You are given a list of integers and you need to write a Python function that returns the index of the maximum element in the list. If the list is empty, the function should return -1.	def max_index(list_): if not list_: return -1 return list_.index(max(list_))
You are given a string and you need to write a Python function that returns the string with all leading and trailing whitespaces removed, and all multiple whitespaces in the middle replaced with a single space.	def normalize_string(s): return ' '.join(s.split())
Given a list of integers, write a function to find the occurrences of each integer in the list and return a dictionary with the integers as keys and their occurrences as values.	def count_occurrences(lst): occurrences = {} for num in lst: if num in occurrences: occurrences[num] += 1 else: occurrences[num] = 1 return occurrences;
Write a function that takes a string s as input and returns the string with all vowels removed.	def remove_vowels(s): vowels = 'aeiouAEIOU' return ''.join([char for char in s if char not in vowels]);
You are given a list of strings. Write a function to find the longest string in the list and return it.	def find_longest_string(lst): longest_str = max(lst, key=len) return longest_str;
Given a 2D list of integers, write a function to flatten the list and return a 1D list.	def flatten_2d_list(lst): return [num for sublist in lst for num in sublist];
You are given a string s consisting of parentheses. Write a function to check if the parentheses in the string are balanced.	def are_parentheses_balanced(s): stack = [] for char in s: if char == '(': stack.append(char) elif char == ')': if not stack: return False stack.pop() return not stack;
Write a Python function that takes a string as input and returns the string with all the characters in uppercase.	def convert_to_uppercase(s): return s.upper()
Implement a Python program that takes a list of integers as input and returns a new list with all the numbers multiplied by 3.	def multiply_by_three(lst): return [i * 3 for i in lst]
Write a Python program to create a list of tuples from two lists, with elements from the first list as the first element of the tuple and elements from the second list as the second element of the tuple. If the lists are of unequal length, the remaining tuples should have 'None' as their second element.	def create_tuples(lst1, lst2): length = max(len(lst1), len(lst2)) return [(lst1[i] if i < len(lst1) else None, lst2[i] if i < len(lst2) else None) for i in range(length)]
Develop a Python function to find the maximum value in a list of numbers.	def find_max_value(lst): return max(lst)
Create a program that takes a string as input and returns the string with all the characters in reverse order.	def reverse_string(s): return s[::-1]
Write a Python function that takes a list of strings as input and returns a list of strings where each string has been capitalized.	def capitalize_strings(lst): return [s.capitalize() for s in lst]
Write a Python function that takes a string as input and returns the count of vowels in the string.	def count_vowels(s): count = 0 for char in s: if char.lower() in 'aeiou': count += 1 return count
Write a Python function that takes a list of tuples as input where each tuple contains two integers and returns the sum of all the integers in the list.	def sum_tuple_integers(lst): return sum(sum(t) for t in lst)
Write a Python function that takes a list of integers as input and returns a list of integers where all the elements are in descending order.	def sort_descending(lst): return sorted(lst, reverse=True)
Write a Python function that takes a string as input and returns the frequency of each character in the string, ignoring case.	def char_frequency(s): freq = {} for char in s.lower(): if char in freq: freq[char] += 1 else: freq[char] = 1 return freq
Create a function that accepts a string as input and returns the string with all the occurrences of a specific substring removed. The function should take two parameters: the original string and the substring to be removed.	def remove_substring(original, substring): return original.replace(substring, '')
Write a program that takes a list of integers as input from the user and then calculates and returns the average of all the numbers in the list.	def calculate_average(numbers): return sum(numbers) / len(numbers)
Create a Python function that accepts a string as input and returns the string with all the characters in uppercase.	def uppercase_string(s): return s.upper()
Design a Python function that accepts a list of strings as input and returns the string with the maximum number of vowels.	def max_vowels(lst): vowels = 'aeiouAEIOU' max_count = 0 max_str = '' for string in lst: count = sum(1 for char in string if char in vowels) if count > max_count: max_count = count max_str = string return max_str
Create a Python function that takes a list of integers as input and returns a new list containing only the numbers that are greater than the average of the original list.	def filter_numbers(lst): avg = sum(lst) / len(lst) return [num for num in lst if num > avg]
Write a Python function that takes a list of integers as input and returns the most frequently occurring integer in the list.	def most_frequent_integer(lst): freq = {} max_freq = 0 max_num = None for num in lst: if num in freq: freq[num] += 1 else: freq[num] = 1 if freq[num] > max_freq: max_freq = freq[num] max_num = num return max_num
Create a Python function that takes a string as input and returns the string in reverse order.	def reverse_string(s): return s[::-1]
Write a Python function that takes a list of strings as input and returns the longest string in the list.	def longest_string(lst): return max(lst, key=len)
Write a Python function that takes a dictionary as input and returns a new dictionary with the keys and values swapped.	def swap_dict(d): return {v: k for k, v in d.items()}
Create a Python function that takes a list of integers as input and returns the list sorted in descending order.	def sort_descending(lst): return sorted(lst, reverse=True)
Write a Python function to count the occurrences of each word in a given text.	def count_word_occurrences(text): words = text.split() word_counts = {} for word in words: word = word.lower() if word in word_counts: word_counts[word] += 1 else: word_counts[word] = 1 return word_counts
Create a Python function to find the longest string in a given list of strings.	def find_longest_string(strings): longest_string = max(strings, key=len) return longest_string
Implement a Python function to convert a given temperature from Celsius to Fahrenheit.	def celsius_to_fahrenheit(celsius): fahrenheit = (celsius * 9/5) + 32 return fahrenheit
Write a Python function to find the index of the first occurrence of a specified element in a given list.	def find_index(lst, element): try: return lst.index(element) except ValueError: return -1
Create a Python function to check if a given string is a palindrome.	def is_palindrome(s): return s == s[::-1]
Write a Python function to count the number of prime numbers less than or equal to a given integer n.	def count_primes(n): primes = [True for i in range(n + 1)] p = 2 while p * p <= n: if primes[p]: for i in range(p * p, n + 1, p): primes[i] = False p += 1 prime_count = 0 for p in range(2, n + 1): if primes[p]: prime_count += 1 return prime_count
Write a Python function that takes a string as input and returns the string with all occurrences of 'aaa' removed.	def remove_aaa(s): while 'aaa' in s: s = s.replace('aaa', '') return s
Write a Python function to calculate the sum of the squares of the first n natural numbers.	def sum_of_squares(n): sum = 0 for i in range(1, n + 1): sum += i ** 2 return sum
Write a Python function that takes a list of integers as input and returns True if the list contains at least one pair of elements that have the same absolute value, and False otherwise.	def has_same_absolute_value(lst): seen = set() for num in lst: if -num in seen: return True seen.add(num) return False
Write a Python function that takes a list of strings as input and returns the length of the longest string.	def longest_string_length(lst): return max(len(s) for s in lst)
Write a function that calculates the distance between two points in a 2D space, where each point is given as a tuple of two coordinates.	def calculate_distance(point1, point2): x1, y1 = point1 x2, y2 = point2 return ((x2 - x1) ** 2 + (y2 - y1) ** 2) ** 0.5
Write a function that checks if all elements in a given list are unique.	def all_unique(lst): return len(lst) == len(set(lst))
Write a function that returns the most frequently occurring element in a given list.	from collections import Counter def most_frequent(lst): counts = Counter(lst) max_count = max(counts.values()) most_frequent_elements = [element for element, count in counts.items() if count == max_count] return most_frequent_elements
Write a function that calculates the number of vowels in a given string.	def count_vowels(s): vowels = 'aeiou' return sum(1 for char in s.lower() if char in vowels)
Write a function that checks if a given number is a prime number.	def is_prime(n): if n <= 1: return False if n == 2: return True if n % 2 == 0: return False max_divisor = int(n**0.5) + 1 for d in range(3, max_divisor, 2): if n % d == 0: return False return True
Write a function called 'most_frequent' that takes a list of elements as an argument and returns the most frequent element in the list.	def most_frequent(input_list): frequency_dict = {} for element in input_list: if element in frequency_dict: frequency_dict[element] += 1 else: frequency_dict[element] = 1 max_frequency = max(frequency_dict.values()) most_frequent_elements = [key for key, value in frequency_dict.items() if value == max_frequency] return most_frequent_elements[0] if len(most_frequent_elements) == 1 else most_freque…
Write a Python function called 'is_anagram' that takes two strings as input and returns True if they are anagrams of each other, False otherwise.	def is_anagram(str1, str2): return sorted(str1) == sorted(str2)
Implement a Python function called 'largest_diff' that takes a list of integers as input and returns the largest difference between any two elements in the list.	def largest_diff(input_list): return max(input_list) - min(input_list)
Write a Python function called 'common_elements' that takes two lists as input and returns a list of common elements between them.	def common_elements(list1, list2): return list(set(list1) & set(list2))
Write a Python function called 'reverse_dict' that takes a dictionary as input and returns a new dictionary with keys and values swapped.	def reverse_dict(input_dict): return {value: key for key, value in input_dict.items()}
Write a function to check if a given string is a palindrome, i.e., the string remains the same when its characters are inverted.	def is_palindrome(s): return s == s[::-1]
Write a function that takes a string and returns the number of vowels in the string.	def count_vowels(s): vowels = 'aeiou' return sum(1 for char in s.lower() if char in vowels)
Write a function that takes a list of strings as input and returns the longest string in the list.	def longest_string(lst): return max(lst, key=len)
Write a function that takes two lists of integers as input and returns true if they are identical, false otherwise.	def are_lists_identical(lst1, lst2): return lst1 == lst2
Given a list of strings, write a function to return the string with the maximum number of characters.	def max_length_string(lst): return max(lst, key=lambda x: len(x))
Write a Python function that takes an integer as input and returns its factorial.	def factorial(n): if n == 0: return 1 else: return n * factorial(n-1)
Given a list of strings, write a function to find the longest string in the list.	def longest_string(lst): return max(lst, key=len)
Write a Python function to check if a given string is a pangram, that is, it uses all the letters of the alphabet at least once.	import string def is_pangram(s): alphabet = set(string.ascii_lowercase) return set(s.lower()).issuperset(alphabet)
Given a list of integers, write a function to find the first duplicate element in the list.	def first_duplicate(lst): seen = set() for num in lst: if num in seen: return num seen.add(num) return None
Write a Python function to find the maximum sum of a subarray within a one-dimensional array.	def max_subarray_sum(lst): max_sum = float('-inf') current_sum = 0 for num in lst: current_sum = max(num, current_sum + num) max_sum = max(max_sum, current_sum) return max_sum
Write a function that takes in a list of integers and returns the count of all numbers that are greater than the average of the list.	def count_greater_than_average(lst): if not lst: return 0 avg = sum(lst) / len(lst) return sum(1 for num in lst if num > avg)
Create a Python function that takes a string as input and returns the string with all uppercase characters changed to lowercase characters and all lowercase characters changed to uppercase characters.	def swap_case(s): return s.swapcase()
Write a Python function that takes a list of strings as input and returns a list of strings where all strings have been converted to lowercase.	def convert_to_lower(lst): return [s.lower() for s in lst]
Create a Python function that takes a list of integers as input and returns a list of pairs where each pair contains a number and its square.	def num_and_square(lst): return [(num, num ** 2) for num in lst]
Write a function that takes a list of strings as input and returns the longest string in the list.	def longest_string(lst): if not lst: return "" return max(lst, key=len)
Write a function that takes a list of integers as input and returns the second largest number in the list.	def second_largest(lst): largest = second_largest_num = float('-inf') for num in lst: if num > largest: second_largest_num = largest largest = num elif num > second_largest_num and num != largest: second_largest_num = num return second_largest_num if second_largest_num != float('-inf') else None
Write a Python function that takes a list of tuples as input where each tuple contains two integers representing the start and end points of a range, and returns the total number of intersections among all ranges.	def count_intersections(ranges): points = [] for r in ranges: points.append((r[0], 1)) points.append((r[1], -1)) points.sort() count = 0 intersections = 0 for p in points: count += p[1] if count > 1: intersections += 1 return intersections
Develop a function that takes a list of integers as input and returns the absolute difference between the sum of its odd-indexed elements and the sum of its even-indexed elements.	def odd_even_diff(lst): odd_sum = sum(lst[i] for i in range(1, len(lst), 2)) even_sum = sum(lst[i] for i in range(0, len(lst), 2)) return abs(odd_sum - even_sum)
Write a function that takes a list of strings as input and returns the string that appears most frequently in the list.	def most_frequent_str(lst): freq = {} for s in lst: if s in freq: freq[s] += 1 else: freq[s] = 1 return max(freq, key=freq.get)
Write a Python function that takes a list of integers as input and returns the index of the first occurrence of the smallest number in the list.	def index_of_min(lst): return lst.index(min(lst))
Write a Python function that takes a list of integers as input and returns the list sorted in descending order.	def sort_descending(lst): return sorted(lst, reverse=True)
Create a Python function that takes a string as input and returns the string with all digits removed.	def remove_digits(s): return ''.join(char for char in s if not char.isdigit())
Write a program to create a dictionary where the keys are months of the year and the values are the number of days in each month.	def days_in_months(): months = ['January', 'February', 'March', 'April', 'May', 'June', 'July', 'August', 'September', 'October', 'November', 'December'] days = [31, 28, 31, 30, 31, 30, 31, 31, 30, 31, 30, 31] return dict(zip(months, days))
Write a function to find the median of a list of numbers. If the list has an even number of elements, the function should return the average of the two middle numbers.	def find_median(lst): lst.sort() n = len(lst) if n % 2 == 0: return (lst[n//2 - 1] + lst[n//2]) / 2 else: return lst[n//2]
Create a Python function that takes a list of words as input and returns the longest word in the list.	def longest_word(lst): return max(lst, key=len)
Write a Python function that takes a list of strings as input and returns the string with the maximum length.	def find_longest_string(lst): return max(lst, key=len)
Write a Python function that takes a list of integers as input and returns a new list containing only the even numbers.	def filter_even_numbers(lst): return [num for num in lst if num % 2 == 0]
Write a Python function that takes a list of strings as input and returns the total number of vowels in the strings.	def count_vowels(lst): vowels = 'aeiouAEIOU' return sum(1 for string in lst for char in string if char in vowels)
Write a Python function that takes a list of integers as input and returns the index of the first occurrence of the smallest number in the list.	def find_min_index(lst): return lst.index(min(lst))
Write a Python function that takes two lists of integers as input and returns True if the lists have the same elements, regardless of their order, and False otherwise.	def have_same_elements(lst1, lst2): return sorted(lst1) == sorted(lst2)
Write a Python function that takes a dictionary as input and returns True if the dictionary contains at least one key with a value greater than 10, False otherwise.	def has_key_greater_than_ten(d): for value in d.values(): if value > 10: return True return False
Create a Python function that takes a string as input and returns the string with all occurrences of the substring " hello " replaced with " goodbye ".	def replace_hello_with_goodbye(s): return s.replace(" hello ", " goodbye ")
Write a Python function to compute the product of all the elements in a list.	def compute_product(lst): product = 1 for num in lst: product *= num return product
Write a Python program that takes a list of strings as input and returns the count of strings that are at least 5 characters long.	def count_long_strings(lst): count = 0 for s in lst: if len(s) >= 5: count += 1 return count
Develop a Python program that takes a list of lists of integers as input and returns the average value of the maximum values in each inner list.	def average_max_values(lst): max_values = [max(inner_lst) for inner_lst in lst] return sum(max_values) / len(max_values)
Write a function that converts a string to uppercase and returns the result.	def to_upper_case(s): return s.upper()
Write a function that calculates the product of all elements in a list.	def product_of_list(lst): product = 1 for num in lst: product *= num return product
Write a class "Rectangle" with attributes "length" and "width" and methods "area" and "perimeter".	class Rectangle: def __init__(self, length, width): self.length = length self.width = width def area(self): return self.length * self.width def perimeter(self): return 2 * (self.length + self.width)
Write a function that takes a list of integers as input and returns the maximum value in the list.	def max_value(lst): return max(lst)
Write a function that takes a list of strings as input and returns the concatenated string.	def concatenate_strings(lst): concatenated = '' for string in lst: concatenated += string return concatenated
Create a function that takes a string input and returns the string with all vowels removed.	def remove_vowels(input_str): vowels = 'aeiouAEIOU' return ''.join([char for char in input_str if char not in vowels])
Write a function that takes a list of numbers as input and returns the second smallest number in the list.	def second_smallest(lst): if len(lst) < 2: return None lst = list(set(lst)) # remove duplicates lst.sort() return lst[1]
Implement a function that takes in a list of strings and returns the longest string in the list.	def longest_string(lst): return max(lst, key=len)
Write a function that takes a list of integer pairs as input and returns the pair with the maximum sum.	def max_sum_pair(lst): return max(lst, key=lambda x: x[0] + x[1])
Create a function that takes a list of numbers as input and returns True if the list is in descending order, False otherwise.	def is_descending(lst): return all(lst[i] >= lst[i+1] for i in range(len(lst) - 1))
Write a Python function that takes a list of words as input and returns a dictionary where the keys are the words and the values are the number of times each word appears in the list.	def count_word_frequency(word_list): frequency_dict = {} for word in word_list: if word in frequency_dict: frequency_dict[word] += 1 else: frequency_dict[word] = 1 return frequency_dict
Create a function that takes a list of integers as input and returns the maximum sum of a contiguous subarray within the list.	def max_subarray_sum(array): max_sum = float('-inf') current_sum = 0 for num in array: current_sum = max(num, current_sum + num) max_sum = max(max_sum, current_sum) return max_sum
Given a dictionary where the keys are names of cities and the values are their corresponding populations, write a function that returns a list of city names that have a population above 1 million.	def cities_above_million(city_population_dict): return [city for city, population in city_population_dict.items() if population > 1000000]
You are given a list of tuples where each tuple contains a student's name and grade. Create a function that returns a dictionary where the keys are the student names and the values are their averages grades.	def average_grades(student_grades_list): average_grades_dict = {} for student, grades in student_grades_list: average_grades_dict[student] = sum(grades) / len(grades) return average_grades_dict
Write a Python function that takes a list of strings as input and returns a set of characters that appear in all strings.	def common_characters(strings_list): common_chars = set(strings_list[0]) for string in strings_list[1:]: common_chars &= set(string) return common_chars
Write a function that takes a list of strings as input and returns the longest string in the list.	def longest_string(strings): return max(strings, key=len)
Design a Python program to convert inches to feet and inches using a function.	def inches_to_feet_inches(inches): feet = inches // 12 remaining_inches = inches % 12 return f"{feet} feet and {remaining_inches} inches"
Write a function that takes a list of numbers as input and returns the count of numbers in the list that are greater than the average of the numbers.	def count_above_average(numbers): average = sum(numbers) / len(numbers) return sum(1 for num in numbers if num > average)
Write a function that takes a string as input and returns the reversed string.	def reverse_string(s): return s[::-1]
Design a Python program to check if a given number is a palindrome number using a function.	def is_palindrome(n): return str(n) == str(n)[::-1]
You are given a list of strings. Write a Python function to find the total count of all strings that start with a vowel in the list.	def count_strings_starting_with_vowel(lst): vowels = 'aeiouAEIOU' count = 0 for string in lst: if string and string[0] in vowels: count += 1 return count
Write a function that takes a dictionary of lists as input where each list contains integers representing ages of people in a certain group. The function should return the group with the highest average age.	def group_with_highest_average_age(ages): max_avg_age = 0 group_with_max_avg_age = '' for group, age_list in ages.items(): avg_age = sum(age_list) / len(age_list) if avg_age > max_avg_age: max_avg_age = avg_age group_with_max_avg_age = group return group_with_max_avg_age
Write a Python function that takes a list of integers as input and returns a list of all numbers that are divisible by 3 or 5.	def numbers_divisible_by_3_or_5(lst): return [num for num in lst if num % 3 == 0 or num % 5 == 0]
You are given a list of strings. Write a Python function to find the total count of all strings that contain at least one number in the list.	def count_strings_with_numbers(lst): count = 0 for string in lst: if any(char.isdigit() for char in string): count += 1 return count
Write a function that takes a list of integers as input and returns the sum of all the numbers that are at an even index in the list.	def sum_of_numbers_at_even_index(lst): return sum(lst[i] for i in range(0, len(lst), 2))
You are given a dictionary containing student names as keys and their corresponding ages as values. Write a Python function to filter out students with ages less than 18 years old and return the filtered dictionary.	def filter_students(students): filtered_students = {name: age for name, age in students.items() if age >= 18} return filtered_students
Write a Python function that takes a string as input and returns the string with all duplicate characters removed.	def remove_duplicates(s): return ''.join(set(s))
You are given a list of integers. Write a Python function to find the maximum sum of a contiguous subarray within the list.	def max_subarray_sum(nums): max_sum = float('-inf') current_sum = 0 for num in nums: current_sum = max(num, current_sum + num) max_sum = max(max_sum, current_sum) return max_sum
Create a Python function that takes a list of strings as input and returns the longest common prefix among all strings.	def longest_common_prefix(strings): if not strings: return '' prefix = strings[0] for s in strings[1:]: while not s.startswith(prefix): prefix = prefix[:-1] return prefix
Write a Python function to reverse the order of the words in a given sentence.	def reverse_words(sentence): words = sentence.split() reversed_words = words[::-1] reversed_sentence = ' '.join(reversed_words) return reversed_sentence
Create a Python function that returns the last N elements of a given list.	def last_elements(lst, N): return lst[-N:]
You are given a string, and you need to write a Python function that returns the number of vowels in the string.	def count_vowels(s): vowels = 'aeiouAEIOU' return sum(1 for char in s if char in vowels)
Write a Python function that takes a list of integers and returns a new list that contains the square of each number.	def squares(lst): return [x**2 for x in lst]
Implement a Python function that checks if a given string is a palindrome.	def is_palindrome(s): return s == s[::-1]
You are given a dictionary where the keys are student names and the values are their grades.	def invert_dict(d): inverted = {} for key, value in d.items(): if value not in inverted: inverted[value] = [key] else: inverted[value].append(key) return inverted
Create a function that takes a list of strings as input and returns a new list containing only the strings that have more than 5 characters.	def filter_strings(lst): new_list = [string for string in lst if len(string) > 5] return new_list
Design a function that takes a dictionary as input and returns a new dictionary containing only the key-value pairs where the value is greater than 10.	def filter_dict(dictionary): new_dict = {key: value for key, value in dictionary.items() if value > 10} return new_dict
Write a function that takes a list of integers as input and returns the product of all the numbers in the list.	def product_of_list(lst): product = 1 for num in lst: product *= num return product
Create a function that takes a string as input and returns the string with all the characters in uppercase.	def uppercase_string(s): return s.upper()
Write a Python function that takes a list of integers as input and returns a new list containing the square of each number in the list.	def square_numbers(lst): return [num ** 2 for num in lst]
Write a function called calculate_median that takes a list of integers as input and returns the median value of the list. If the list is empty, it should return None.	def calculate_median(lst): if not lst: return None sorted_lst = sorted(lst) n = len(lst) if n % 2 == 1: return sorted_lst[n // 2] else: mid1 = sorted_lst[n // 2 - 1] mid2 = sorted_lst[n // 2] return (mid1 + mid2) / 2
Write a Python function to check if a given string is a palindrome. The function should return True if the string is a palindrome and False otherwise.	def is_palindrome(s): return s == s[::-1]
Write a function called get_most_frequent that takes a list of integers as input and returns the most frequent integer in the list. If there are multiple integers with the same highest frequency, it should return any of them. If the list is empty, it should return None.	def get_most_frequent(lst): if not lst: return None freq_dict = {} for elem in lst: if elem in freq_dict: freq_dict[elem] += 1 else: freq_dict[elem] = 1 max_freq = max(freq_dict.values()) for key, value in freq_dict.items(): if value == max_freq: return key
Write a function called count_vowels that takes a string as input and returns the total count of vowels in the string. Vowels are the characters 'a', 'e', 'i', 'o', 'u', both lowercase and uppercase.	def count_vowels(s): vowels = 'aeiouAEIOU' count = 0 for char in s: if char in vowels: count += 1 return count
Write a function called get_longest_word that takes a string as input and returns the longest word in the string. If there are multiple words with the same maximum length, it should return any of them. If the string is empty, it should return None.	def get_longest_word(s): if not s: return None words = s.split() max_len = 0 longest_word = '' for word in words: if len(word) > max_len: max_len = len(word) longest_word = word return longest_word
Write a function that takes a list of strings as an input and returns the number of strings that contain the letter "a".	def count_strings_with_a(strings): count = 0 for string in strings: if 'a' in string: count += 1 return count
Write a function that takes a list of integers as input and returns the product of all the odd numbers in the list.	def product_of_odd_numbers(numbers): product = 1 for number in numbers: if number % 2 != 0: product *= number return product
Write a function that takes a string as an input and returns the string in uppercase if the string's length is even, otherwise returns the string in lowercase.	def uppercase_or_lowercase(s): if len(s) % 2 == 0: return s.upper() else: return s.lower()
Write a function that takes a list of lists of integers as input and returns the sum of all the integers in the inner lists.	def sum_of_inner_lists(int_lists): total_sum = 0 for inner_list in int_lists: total_sum += sum(inner_list) return total_sum
Write a class called "Circle" with attributes "radius" and methods "area" and "circumference".	import math class Circle: def __init__(self, radius): self.radius = radius def area(self): return math.pi * self.radius ** 2 def circumference(self): return 2 * math.pi * self.radius
Write a Python function that takes two lists of strings as input and returns a new list with all strings that appear in both lists.	def common_strings(list1, list2): return list(set(list1) & set(list2))
Write a Python program to calculate the total cost of items in a shopping cart, given a list of items with their quantities and prices as input.	def calculate_total_cost(shopping_cart): total_cost = 0 for item in shopping_cart: quantity, price = item total_cost += quantity * price return total_cost
Create a Python program that takes a list of integers as input and returns the list of integers with all duplicate values removed.	def remove_duplicates(numbers): return list(set(numbers))
Write a Python function that takes a string as input and returns the string with all vowels removed.	def remove_vowels(input_string): vowels = 'aeiouAEIOU' return ''.join([char for char in input_string if char not in vowels])
Design a Python function that accepts a list of lists as input and returns a new list that includes all sublists with an even number of elements.	def filter_even_sublists(list_of_lists): return [sublist for sublist in list_of_lists if len(sublist) % 2 == 0]
Write a Python function that takes a list of strings as input and returns the number of strings in the list that contain the substring "abc".	def count_abc(strings_list): count = 0 for s in strings_list: if "abc" in s: count += 1 return count;
Create a function `find_max` that takes a list of integers as input and returns the maximum number in the list.	def find_max(num_list): if len(num_list) == 0: return 0 return max(num_list);
Write a function that takes a list of numbers and a target number as input, and returns True if the target number can be formed by adding up any combination of numbers from the list, and False otherwise.	def can_form_target(num_list, target): if target == 0: return True if len(num_list) == 0: return False if num_list[0] > target: return can_form_target(num_list[1:], target) return can_form_target(num_list[1:], target - num_list[0]) or can_form_target(num_list[1:], target);
Create a function `count_characters` that takes a string as input and returns a dictionary where the keys are the characters in the string and the values are their respective frequencies.	def count_characters(s): char_freq = {} for char in s: if char in char_freq: char_freq[char] += 1 else: char_freq[char] = 1 return char_freq;
Write a function that takes a list of integers as input and returns the second-smallest number in the list.	def find_second_smallest(num_list): if len(num_list) < 2: return None num_list = list(set(num_list)) num_list.sort() return num_list[1];
Create a function that takes a list of integers as input and returns a new list containing the square of each element.	def square_elements(lst): return [i**2 for i in lst]
Write a function to count the number of words in a given string.	def count_words(s): return len(s.split())
Implement a function that takes a list of strings as input and returns a new list containing only the strings that have more than 3 characters.	def filter_strings(lst): return [s for s in lst if len(s) > 3]
Create a function that takes two lists of integers as input and returns a new list containing the elements that are common to both lists.	def common_elements(lst1, lst2): return [i for i in lst1 if i in lst2]
Write a function to find the maximum value in a list of integers.	def max_value(lst): return max(lst)
Write a function to count the frequency of each word in a given string.	def word_frequency(s): words = s.split() frequency = {} for word in words: if word in frequency: frequency[word] += 1 else: frequency[word] = 1 return frequency
Write a function to find the maximum and minimum elements in a given list of integers.	def find_max_min(lst): max_element = max(lst) min_element = min(lst) return max_element, min_element
Write a function to determine whether a given number is a perfect square or not.	import math def is_perfect_square(n): sqrt = math.sqrt(n) return sqrt == int(sqrt)
Write a function to extract all the digits from a given string.	def extract_digits(s): return [int(digit) for digit in s if digit.isdigit()]
Write a function to reverse a given list of elements.	def reverse_list(lst): return lst[::-1]
Given a list of tuples containing student names and their corresponding GPAs, write a function that returns a new list that only contains the names of students with a GPA above 3.5.	def filter_students(students): return [student[0] for student in students if student[1] > 3.5]
Write a function that takes a list of integers as input and returns the sum of all the prime numbers within the list.	def sum_primes(numbers): def is_prime(n): if n <= 1: return False if n == 2: return True if n % 2 == 0: return False max_divisor = int(n**0.5) + 1 for d in range(3, max_divisor, 2): if n % d == 0: return False return True return sum(num for num in numbers if is_prime(num))
Create a class called Circle with attributes radius and color. The class should have methods to calculate the area and circumference of the circle.	import math class Circle: def __init__(self, radius, color): self.radius = radius self.color = color def area(self): return math.pi * self.radius ** 2 def circumference(self): return 2 * math.pi * self.radius
Write a function that takes a list of strings as input and returns the string that appears most frequently in the list.	def most_frequent_string(strings): frequency = {} for string in strings: if string in frequency: frequency[string] += 1 else: frequency[string] = 1 return max(frequency, key=frequency.get)
Given a dictionary where the keys are countries and the values are lists of cities, write a function that returns a new dictionary where the keys are cities and the values are lists of countries they belong to.	def cities_to_countries(countries): cities_dict = {} for country, cities in countries.items(): for city in cities: if city in cities_dict: cities_dict[city].append(country) else: cities_dict[city] = [country] return cities_dict
Write a function that takes a list of strings as input and returns the count of strings that contain the substring "abc".	def count_abc(lst): count = 0 for string in lst: if "abc" in string: count += 1 return count
Write a function that takes a dictionary as input and returns a list of keys that have values greater than 10.	def keys_with_values_greater_than_10(d): keys = [] for key, value in d.items(): if value > 10: keys.append(key) return keys
Write a function that takes a binary tree as input and returns the sum of values of all nodes in the binary tree.	class Node: def __init__(self, val, left=None, right=None): self.val = val self.left = left self.right = right def sum_of_node_values(root): if root is None: return 0 return root.val + sum_of_node_values(root.left) + sum_of_node_values(root.right)
Write a function that takes a string as input and returns True if all characters in the string are unique, False otherwise.	def all_characters_unique(s): return len(set(s)) == len(s)
Write a function that takes two lists of integers as input and returns a list of elements that are common to both lists.	def common_elements(lst1, lst2): return [element for element in lst1 if element in lst2]
Write a Python function to find the maximum value in a list of integers.	def find_max_value(lst): return max(lst)
Write a function that takes a string as input and returns the string in uppercase.	def to_uppercase(s): return s.upper()
Write a Python function that takes a list of strings as input and returns the list in alphabetical order.	def sort_strings(lst): return sorted(lst)
Create a Python function that takes a list of integers as input and returns True if the list is sorted in ascending order, False otherwise.	def is_sorted(lst): return lst == sorted(lst)
Write a function that takes a string as input and returns the number of vowels in the string.	def count_vowels(s): vowels = 'aeiou' return sum(1 for char in s.lower() if char in vowels)
Write a function to find the longest consecutive sequence of ones in a binary string.	``` def longest_consecutive_ones(s): max_ones = 0 current_ones = 0 for char in s: if char == '1': current_ones += 1 max_ones = max(max_ones, current_ones) else: current_ones = 0 return max_ones ```
Write a function to count the number of occurrences of a substring in a given string.	``` def count_substring_occurrences(s, sub): return s.count(sub) ```
Write a function to find the first duplicate in an array of integers. If there is no duplicate, return -1.	``` def first_duplicate(arr): seen = set() for num in arr: if num in seen: return num seen.add(num) return -1 ```
Write a function to reverse words in a sentence while maintaining the order of the words.	``` def reverse_words(sentence): words = sentence.split() reversed_words = [word[::-1] for word in words] return ' '.join(reversed_words) ```
Write a function to calculate the sum of all prime numbers up to a given number.	``` def sum_of_primes(n): def is_prime(num): if num < 2: return False for i in range(2, int(num**0.5) + 1): if num % i == 0: return False return True return sum(num for num in range(2, n + 1) if is_prime(num)) ```
Write a Python function that takes a list of strings as input and returns the longest string in the list. If the list is empty, return an empty string.	def longest_string(lst): if not lst: return "" return max(lst, key=len)
Implement a function that calculates the average of all numbers in a given list. If the list is empty, return 0.	def average(lst): if not lst: return 0 return sum(lst) / len(lst)
Write a Python function that takes a string as input and returns the count of all vowels in the string. Consider both lowercase and uppercase vowels.	def count_vowels(s): vowels = "aeiouAEIOU" return sum(1 for char in s if char in vowels)
Write a Python function that takes a list of strings as input and returns the count of all strings that start with a vowel. Consider both lowercase and uppercase vowels.	def count_strings_starting_with_vowel(lst): vowels = "aeiouAEIOU" return sum(1 for s in lst if s and s[0] in vowels)
Write a Python function that takes a list of integers as input and returns the count of all numbers that are greater than the average of the list. If the list is empty, return 0.	def count_numbers_greater_than_average(lst): if not lst: return 0 avg = sum(lst) / len(lst) return sum(1 for num in lst if num > avg)
You are given a list of tuples as an input, where each tuple contains a student's name and their grade. Write a Python function to calculate the average grade of all students.	def calculate_average_grade(students): total_grade = 0 for student, grade in students: total_grade += grade average_grade = total_grade / len(students) return average_grade
Write a function that takes a list of integers as input and returns a new list containing only the even numbers from the original list.	def get_even_numbers(numbers): even_numbers = [num for num in numbers if num % 2 == 0] return even_numbers
You are given a string as an input. Write a Python function to count the number of vowels in the string and return the result.	def count_vowels(s): vowels = 'aeiou' count = 0 for char in s.lower(): if char in vowels: count += 1 return count
Write a function that takes a dictionary as input and returns a new dictionary where the keys and values are swapped.	def swap_key_value(d): new_dict = {v: k for k, v in d.items()} return new_dict
You are given a list of strings as an input, where each string represents a binary number (i.e., a string consisting of only 0s and 1s). Write a Python function to convert each binary string to an integer and return the total sum of these integers.	def sum_binary_strings(bin_strings): total_sum = 0 for s in bin_strings: total_sum += int(s, 2) return total_sum
Write a Python function that takes a list of integers as input, removes the duplicates from the list and returns the sorted list in ascending order.	def remove_duplicates_and_sort(lst): return sorted(list(set(lst)))
Implement a function that calculates the average of a list of numbers.	def calculate_average(numbers): return sum(numbers) / len(numbers)
You are given a list of strings as input. Write a function that takes this list as an argument and returns a new list where each string has been converted to uppercase.	def strings_to_uppercase(lst): return [s.upper() for s in lst]
Write a Python function to count the frequency of each character in a string.	def count_chars_frequency(s): return {char: s.count(char) for char in set(s)}
Write a Python function that takes a list of tuples as input, where each tuple contains a string and an integer. The function should return a new list where the string in each tuple has been repeated the number of times specified by the integer.	def repeat_strings(lst): return [(s * n) for s, n in lst]
Write a Python program that takes a list of integers as input and returns the median of the list.	def calculate_median(lst): sorted_lst = sorted(lst) lst_len = len(lst) if lst_len % 2 == 0: median = (sorted_lst[lst_len // 2 - 1] + sorted_lst[lst_len // 2]) / 2 else: median = sorted_lst[lst_len // 2] return median
Write a Python function that takes a string as input and returns the string with all vowels removed.	def remove_vowels(s): vowels = 'aeiouAEIOU' return ''.join([char for char in s if char not in vowels])
Create a Python program that takes a list of strings as input and returns a new list with all strings in uppercase.	def convert_to_uppercase(lst): return [s.upper() for s in lst]
Write a Python function that takes a list of integers as input and returns the list with all duplicates removed.	def remove_duplicates(lst): return list(set(lst))
Write a Python function that takes a string as input and returns the string with all occurrences of a given substring replaced with another substring.	def replace_substring(s, old, new): return s.replace(old, new)
Write a function to count the occurrence of a specific element in a list. The function should take a list and an element as input and return the count of the element in the list.	def count_element(lst, element): return lst.count(element)
Write a function to return the maximum and minimum values from a dictionary by their keys. The function should take a dictionary as input and return a list containing the maximum and minimum values.	def max_min_dict(d): return [max(d, key=d.get), min(d, key=d.get)]
Write a function to remove duplicates from a list while preserving the original order. The function should take a list as input and return a new list with duplicates removed.	def remove_duplicates(lst): seen = set() return [x for x in lst if not (x in seen or seen.add(x))]
Write a function to convert all keys in a dictionary to uppercase. The function should take a dictionary as input and return a new dictionary with all keys converted to uppercase.	def dict_upper_keys(d): return {k.upper(): v for k, v in d.items()}
Write a function to find the common characters between two strings. The function should take two strings as input and return a string containing the common characters.	def common_chars(s1, s2): set1 = set(s1) set2 = set(s2) return ''.join(sorted(set1 & set2))
Write a Python function that takes a string as an argument and returns True if the string contains at least one digit, and False otherwise.	def has_digit(s): return any(char.isdigit() for char in s)
[truncated: 6,080 more rows]
