# Supplementary material
Source: ML conference proceedings conference paper supplement (https://openreview.net/forum?id=8mM5NzC7da)
Supplement: supplementary_material [file OOD_samples_llama-3-70b-instruct_cpp_augmented_beaver-withresponses.xlsx]

## Sheet: Sheet
Questions	Answers
Write a function that takes a list of integers as input and returns the count of numbers that are greater than their adjacent number in the list.	#include <vector> using namespace std; int countGreaterAdjacent(vector<int> nums) { int count = 0; for (int i = 1; i < nums.size(); i++) { if (nums[i] > nums[i - 1]) { count++; } } return count; }
Given a list of characters, write a function to find and return the first non-repeating character in the list.	#include <vector> #include <unordered_map> using namespace std; char findFirstNonRepeating(vector<char> chars) { unordered_map<char, int> charCount; for (char c : chars) { charCount[c]++; } for (char c : chars) { if (charCount[c] == 1) { return c; } } return '\0'; // Return null character if no non-repeating character found }
You are given two arrays of integers, arr1 and arr2, of the same size. Write a function that returns a new array where each element at index i is the product of the corresponding elements at index i in arr1 and arr2.	#include <vector> using namespace std; vector<int> arrayProduct(vector<int> arr1, vector<int> arr2) { vector<int> productArray; for (int i = 0; i < arr1.size(); i++) { productArray.push_back(arr1[i] * arr2[i]); } return productArray; }
Write a function to find the maximum sum of a subarray within a given list of integers.	#include <vector> using namespace std; int maxSubarraySum(vector<int> nums) { int maxSum = nums[0]; int currentSum = nums[0]; for (int i = 1; i < nums.size(); i++) { currentSum = max(nums[i], currentSum + nums[i]); maxSum = max(maxSum, currentSum); } return maxSum; }
You are given a list of strings. Write a function to find the longest string that is a prefix of all strings in the list.	#include <vector> #include <string> using namespace std; string longestCommonPrefix(vector<string> strs) { if (strs.empty()) { return ""; } string prefix = strs[0]; for (int i = 1; i < strs.size(); i++) { while (strs[i].find(prefix) != 0) { prefix.pop_back(); if (prefix.empty()) { return ""; } } } return prefix; }
Using the input() function, ask the user for their email address and write a function to validate the email address.	```cpp #include <iostream> #include <regex> using namespace std; bool validate_email(string email) { const regex pattern( "(^[a-zA-Z0-9_.+-]+@[a-zA-Z0-9-]+\.[a-zA-Z0-9-.]+$)"); return regex_match(email, pattern); } int main() { cout << "Enter your email address: "; string email; cin >> email; if (validate_email(email)) { cout << "Email is valid"; } else { cout << "Email is not valid"; } return 0;…
Write a function that calculates the area of a circle given its radius.	```cpp #include <iostream> using namespace std; double calculate_circle_area(double radius) { const double pi = 3.14; return pi * radius * radius; } int main() { cout << "Enter the radius of the circle: "; double radius; cin >> radius; double area = calculate_circle_area(radius); cout << "The area of the circle is " << area; return 0; }
Write a function that checks if a number is a prime number or not.	```cpp #include <iostream> using namespace std; bool is_prime(int number) { if (number <= 1) return false; for (int i = 2; i * i <= number; i++) { if (number % i == 0) return false; } return true; } int main() { cout << "Enter a number: "; int number; cin >> number; if (is_prime(number)) { cout << "The number is prime"; } else { cout << "The number is not prime"; } return 0; }
Write a function to count the frequency of each character in a string.	```cpp #include <iostream> #include <unordered_map> using namespace std; unordered_map<char, int> count_character_frequency(string str) { unordered_map<char, int> frequency; for (char c : str) { if (frequency.find(c) != frequency.end()) { frequency[c]++; } else { frequency[c] = 1; } } return frequency; } int main() { cout << "Enter a string: "; string str; cin >> str; unordered_map<char, int> fre…
Write a function to find the maximum value in an array.	```cpp #include <iostream> using namespace std; int find_max_array_value(int arr[], int size) { int max = arr[0]; for (int i = 1; i < size; i++) { if (arr[i] > max) { max = arr[i]; } } return max; } int main() { int size; cout << "Enter the size of the array: "; cin >> size; int arr[size]; cout << "Enter elements of the array: "; for (int i = 0; i < size; i++) { cin >> arr[i]; } int max = find_ma…
Implement a C++ function that takes a vector of integers and returns the sum of all even numbers in the vector. The function should be named `sum_even_numbers` and it should take a vector of integers as input and return an integer representing the sum.	#include <vector> int sum_even_numbers(std::vector<int> numbers) { int sum = 0; for (int i = 0; i < numbers.size(); i++) { if (numbers[i] % 2 == 0) { sum += numbers[i]; } } return sum; }
You are given a map where the keys are names of cities and the values are their corresponding populations. Write a function `find_most_populous_city` that takes this map as an input and returns the name of the city with the highest population. The function should take a map of strings and integers as input and return a string representing the city name.	#include <map> #include <string> std::string find_most_populous_city(std::map<std::string, int> cityPopulation) { std::string mostPopulousCity; int maxPopulation = 0; for (auto& pair : cityPopulation) { if (pair.second > maxPopulation) { maxPopulation = pair.second; mostPopulousCity = pair.first; } } return mostPopulousCity; }
Create a function that takes a vector of strings, and returns True if all strings in the list are lowercase, False otherwise. The function should be named `all_lower_case` and it should take a vector of strings as input and return a boolean value.	#include <vector> #include <string> bool all_lower_case(std::vector<std::string> strings) { for (std::string str : strings) { for (char c : str) { if (c >= 'A' && c <= 'Z') { return false; } } } return true; }
Write a C++ function that accepts a string as input and returns True if the string contains at least one digit, False otherwise. The function should be named `contains_digit` and it should take a string as input and return a boolean value.	#include <string> bool contains_digit(std::string str) { for (char c : str) { if (c >= '0' && c <= '9') { return true; } } return false; }
Implement a C++ function to count the number of occurrences of a specific character in a given string. The function should be named `count_char_occurrences` and it should take a string and a character as input and return an integer representing the count.	#include <string> int count_char_occurrences(std::string str, char c) { int count = 0; for (char ch : str) { if (ch == c) { count++; } } return count; }
Create a C++ function that takes a list of integers and returns the second largest number in the list.	```cpp #include <iostream> #include <vector> #include <algorithm> int secondLargest(std::vector<int> numbers) { if(numbers.size() < 2) { throw std::runtime_error("List must have at least two elements"); } int max = *std::max_element(numbers.begin(), numbers.end()); numbers.erase(std::remove(numbers.begin(), numbers.end(), max), numbers.end()); return *std::max_element(numbers.begin(), numbers.end…
Write a C++ function that takes a string as input and returns the string with all vowels removed.	```cpp #include <iostream> #include <string> std::string removeVowels(std::string str) { std::string result = ""; for(char c : str) { if(c != 'a' && c != 'e' && c != 'i' && c != 'o' && c != 'u' && c != 'A' && c != 'E' && c != 'I' && c != 'O' && c != 'U') { result += c; } } return result; } int main() { std::string str = "Hello World"; std::cout << "String without vowels: " << removeVowels(str) <<…
Create a C++ function that takes a list of integers as input and returns true if the list is sorted in ascending order, false otherwise.	```cpp #include <iostream> #include <vector> #include <algorithm> bool isSorted(std::vector<int> numbers) { for(int i = 0; i < numbers.size() - 1; i++) { if(numbers[i] > numbers[i + 1]) { return false; } } return true; } int main() { std::vector<int> numbers = {1, 2, 3, 4, 5}; std::cout << "Is list sorted? " << (isSorted(numbers) ? "true" : "false") << std::endl; return 0; }
Write a C++ function that takes a string as input and returns the string with all characters in uppercase.	```cpp #include <iostream> #include <string> std::string toUpperCase(std::string str) { for(char &c : str) { c = std::toupper(c); } return str; } int main() { std::string str = "hello world"; std::cout << "String in uppercase: " << toUpperCase(str) << std::endl; return 0; }
Create a C++ function that takes a list of strings as input and returns the longest string in the list.	```cpp #include <iostream> #include <vector> #include <string> std::string longestString(std::vector<std::string> strings) { if(strings.empty()) { throw std::runtime_error("List must not be empty"); } std::string longest = strings[0]; for(const std::string &str : strings) { if(str.size() > longest.size()) { longest = str; } } return longest; } int main() { std::vector<std::string> strings = {"app…
Given a list of integers, write a function that returns the count of odd numbers in the list. The function takes a list of integers as input and returns an integer. Input: list<int>, Output: int.	```cpp int countOddNumbers(vector<int> numbers) { int count = 0; for (int num : numbers) { if (num % 2 != 0) { count++; } } return count; }
Write a function that checks if a given string is a palindrome or not. The function takes a string as input and returns a boolean. Input: string, Output: bool.	```cpp bool isPalindrome(string str) { int start = 0; int end = str.length() - 1; while (start < end) { if (str[start] != str[end]) { return false; } start++; end--; } return true; }
Given a list of integers, write a function that returns the sum of all the numbers at even indices. The function takes a list of integers as input and returns an integer. Input: list<int>, Output: int.	```cpp int sumEvenIndexNumbers(vector<int> numbers) { int sum = 0; for (int i = 0; i < numbers.size(); i += 2) { sum += numbers[i]; } return sum; }
Write a function that takes a string as input and returns the count of vowels in the string. The function takes a string as input and returns an integer. Input: string, Output: int.	```cpp int countVowels(string str) { int count = 0; for (char c : str) { if (c == 'a' || c == 'e' || c == 'i' || c == 'o' || c == 'u' || c == 'A' || c == 'E' || c == 'I' || c == 'O' || c == 'U') { count++; } } return count; }
Write a function that takes two strings as input and returns true if they are equal, ignoring case sensitivity. The function takes two strings as input and returns a boolean. Input: string, string, Output: bool.	```cpp bool isEqualIgnoreCase(string str1, string str2) { if (str1.length() != str2.length()) { return false; } for (int i = 0; i < str1.length(); i++) { if (tolower(str1[i]) != tolower(str2[i])) { return false; } } return true; }
Write a function called "powerOfThree" that takes a list of integers as input and returns a new list that contains only the numbers that are powers of three.	```cpp #include <list> #include <cmath> using namespace std; list<int> powerOfThree(list<int> numbers) { list<int> result; for (int num : numbers) { double log_val = log10(num) / log10(3); if (log_val == int(log_val)) { result.push_back(num); } } return result; }
Write a function called "equalToAverage" that takes a list of integers as input, calculates the average of the list, and then returns a new list containing only the numbers that are equal to the average.	```cpp #include <list> #include <numeric> using namespace std; list<int> equalToAverage(list<int> numbers) { int sum = accumulate(numbers.begin(), numbers.end(), 0); double average = (double)sum / numbers.size(); list<int> result; for (int num : numbers) { if (num == average) { result.push_back(num); } } return result; }
Write a function called "collegeStudent" that takes a string as input representing a student's name, an integer as input representing the student's age, and a list of floats as input representing the student's grades, and returns a boolean indicating whether the student is eligible to graduate (i.e., their average grade is 85 or higher).	```cpp #include <list> #include <numeric> #include <string> using namespace std; bool collegeStudent(string name, int age, list<float> grades) { float sum = accumulate(grades.begin(), grades.end(), 0.0); float average = sum / grades.size(); return average >= 85; }
Write a function called "getVowels" that takes a string as input and returns a new string containing only the vowels from the input string.	```cpp #include <string> using namespace std; string getVowels(string str) { string result; for (char c : str) { switch (tolower(c)) { case 'a': case 'e': case 'i': case 'o': case 'u': result += c; break; } } return result; }
Write a function called "eliminateDuplicates" that takes a list of integers as input and returns a new list containing only the unique elements from the input list.	```cpp #include <list> #include <unordered_set> using namespace std; list<int> eliminateDuplicates(list<int> numbers) { unordered_set<int> unique_numbers(numbers.begin(), numbers.end()); list<int> result(unique_numbers.begin(), unique_numbers.end()); return result; }
Write a C++ function to count the number of vowels in a given string.	int countVowels(string str) { int count = 0; for(int i = 0; i < str.length(); ++i) { char c = tolower(str[i]); if(c == 'a' || c == 'e' || c == 'i' || c == 'o' || c == 'u') { count++; } } return count; }
Write a C++ function to remove duplicates from a given sorted array.	int removeDuplicates(int arr[], int n) { if (n == 0) return 0; int res = 1; for (int i = 1; i < n; i++) { if (arr[i - 1] != arr[i]) { arr[res++] = arr[i]; } } return res; }
Write a C++ function to find the first non-repeating character in a given string.	char firstNonRepeating(string str) { int count[256] = {0}; for(int i = 0; i < str.length(); ++i) { count[(int)str[i]]++; } for(int i = 0; i < str.length(); ++i) { if(count[(int)str[i]] == 1) { return str[i]; } } return '$'; }
Write a C++ function to reverse a given linked list.	Node* reverseList(Node* head) { Node* prev = nullptr; Node* current = head; Node* next = nullptr; while(current != nullptr) { next = current->next; current->next = prev; prev = current; current = next; } head = prev; return head; }
Write a C++ function to check if a given string is a palindrome.	bool isPalindrome(string str) { int start = 0; int end = str.length() - 1; while(start < end) { if(str[start] != str[end]) { return false; } start++; end--; } return true; }
Write a function that takes a list of integers as input and returns a list of integers that are greater than 10.	```cpp #include <vector> std::vector<int> filter_greater_than_10(std::vector<int> numbers) { std::vector<int> result; for (int num : numbers) { if (num > 10) { result.push_back(num); } } return result; }
Write a function that calculates the sum of the cubes of all numbers in a list.	```cpp #include <vector> int sum_of_cubes(std::vector<int> numbers) { int sum = 0; for (int num : numbers) { sum += num * num * num; } return sum; }
Create a function that takes a dictionary as input and returns a new dictionary with only the key-value pairs where the key starts with "A".	```cpp #include <unordered_map> #include <string> std::unordered_map<std::string, int> filter_by_key(std::unordered_map<std::string, int> dict) { std::unordered_map<std::string, int> result; for (auto& pair : dict) { if (pair.first[0] == 'A') { result[pair.first] = pair.second; } } return result; }
Write a function that takes a list of characters as input and returns the count of vowels in the list.	```cpp #include <vector> int count_vowels(std::vector<char> chars) { int count = 0; for (char c : chars) { if (c == 'a' || c == 'e' || c == 'i' || c == 'o' || c == 'u' || c == 'A' || c == 'E' || c == 'I' || c == 'O' || c == 'U') { count++; } } return count; }
Write a function that takes two lists of integers as input and returns a list of integers that are common in both lists.	```cpp #include <vector> #include <unordered_set> std::vector<int> common_elements(std::vector<int> list1, std::vector<int> list2) { std::unordered_set<int> set1(list1.begin(), list1.end()); std::vector<int> result; for (int num : list2) { if (set1.find(num) != set1.end()) { result.push_back(num); } } return result; }
Write a C++ function that takes two floating point numbers as input and returns their product.	float multiplyNumbers(float number1, float number2) { return number1 * number2; }
Create a C++ function that takes a list of strings as input and returns a single string that is a concatenation of all strings in the list.	#include <vector> #include <string> string concatenateStrings(vector<string> strings) { string result = ""; for (string str : strings) { result += str; } return result; }
Develop a C++ function to check if a given string is a palindrome.	#include <string> bool isPalindrome(string str) { int start = 0; int end = str.length() - 1; while (start < end) { if (str[start] != str[end]) { return false; } start++; end--; } return true; }
Write a C++ function that takes a list of integers as input and returns the second largest number in the list.	#include <vector> #include <algorithm> int secondLargest(vector<int> numbers) { if (numbers.size() < 2) { throw std::runtime_error("List must have at least two elements"); } int largest = *max_element(numbers.begin(), numbers.end()); numbers.erase(remove(numbers.begin(), numbers.end(), largest), numbers.end()); return *max_element(numbers.begin(), numbers.end()); }
Create a C++ function that takes a string as input and returns the string with all vowels removed.	#include <string> string removeVowels(string str) { string result = ""; for (char c : str) { if (!isVowel(c)) { result += c; } } return result; } bool isVowel(char c) { c = tolower(c); return c == 'a' || c == 'e' || c == 'i' || c == 'o' || c == 'u'; }
Write a C++ function to check if a given string is a palindrome or not. For example, "madam" is a palindrome as it reads the same backwards as forwards, but "hello" is not. The function takes a string as an input and returns a boolean indicating whether the string is a palindrome or not.	```cpp bool isPalindrome(string input) { string reversedInput = input; reverse(reversedInput.begin(), reversedInput.end()); return input == reversedInput; }
Write a C++ function that takes an array of integers as an input and returns the sum of all the odd numbers in the array.	```cpp int sumOddNumbers(int arr[], int n) { int sum = 0; for (int i = 0; i < n; i++) { if (arr[i] % 2 != 0) { sum += arr[i]; } } return sum; }
Write a C++ function that takes two numbers as inputs and returns their greatest common divisor (GCD).	```cpp int gcd(int a, int b) { if (b == 0) { return a; } return gcd(b, a % b); }
Write a C++ function that takes an integer as an input and returns the sum of its digits. For example, if the input is 123, the function returns 6 (1+2+3).	```cpp int sumDigits(int num) { int sum = 0; while (num != 0) { sum += num % 10; num /= 10; } return sum; }
Write a C++ function that takes a sentence as an input and returns the number of words in the sentence. The function takes a string as an input and returns an integer indicating the number of words in the sentence.	```cpp int countWords(string sentence) { int count = 0; bool inWord = false; for (char c : sentence) { if (c == ' ') { inWord = false; } else if (!inWord) { count++; inWord = true; } } return count; }
Create a function that takes an integer as input and returns the square of the number.	```cpp int squareNum(int num) { return num * num; } // inputs: num (integer) // outputs: square of num (integer) // data types: int, int
Write a function that takes a string as input and returns the string in uppercase.	```cpp #include <algorithm> #include <cctype> std::string toUpperCase(std::string str) { for (char& c : str) { c = std::toupper(c); } return str; } // inputs: str (string) // outputs: uppercase string (string) // data types: string, string
Create a function that takes a vector of integers as input and returns the average of the integers.	```cpp #include <vector> double averageVec(std::vector<int> vec) { double sum = 0; for (int num : vec) { sum += num; } return sum / vec.size(); } // inputs: vec (vector of integers) // outputs: average of vec (double) // data types: vector<int>, double
Write a function that takes two strings as input and returns True if the strings are identical, ignoring the case, and False otherwise.	```cpp #include <algorithm> #include <cctype> bool identicalStrings(std::string str1, std::string str2) { if (str1.size() != str2.size()) return false; for (int i = 0; i < str1.size(); i++) { if (std::tolower(str1[i]) != std::tolower(str2[i])) return false; } return true; } // inputs: str1, str2 (strings) // outputs: identical (boolean) // data types: string, string, bool
Create a function that takes an integer as input and returns True if the number is even, and False otherwise.	```cpp bool isEven(int num) { return num % 2 == 0; } // inputs: num (integer) // outputs: even (boolean) // data types: int, bool
Write a C++ function named calculate_median that takes a list of integers as input and returns the median of the list.	```cpp #include <vector> #include <algorithm> double calculate_median(std::vector<int>& numbers) { std::sort(numbers.begin(), numbers.end()); int size = numbers.size(); if (size % 2 == 0) { return (numbers[size / 2 - 1] + numbers[size / 2]) / 2.0; } else { return numbers[size / 2]; } }
Write a C++ function named find_common_elements that takes two lists of integers as input and returns a list of common elements between the two lists.	```cpp #include <vector> #include <algorithm> std::vector<int> find_common_elements(const std::vector<int>& list1, const std::vector<int>& list2) { std::vector<int> commonElements; for (int i = 0; i < list1.size(); i++) { if (std::find(list2.begin(), list2.end(), list1[i]) != list2.end()) { commonElements.push_back(list1[i]); } } return commonElements; }
Write a C++ function named is_palindrome that takes a string as input and returns true if the string is a palindrome, otherwise returns false.	```cpp #include <string> bool is_palindrome(const std::string& str) { int start = 0; int end = str.length() - 1; while (start < end) { if (str[start] != str[end]) { return false; } start++; end--; } return true; }
Write a C++ function named split_string that takes a string and a delimiter as input and returns a list of strings split by the delimiter.	```cpp #include <vector> #include <string> #include <sstream> std::vector<std::string> split_string(const std::string& str, char delimiter) { std::vector<std::string> tokens; std::string token; std::istringstream tokenStream(str); while (std::getline(tokenStream, token, delimiter)) { tokens.push_back(token); } return tokens; }
Write a C++ function named has_consecutive_elements that takes a list of integers as input and returns true if the list contains at least one pair of consecutive elements, and false otherwise.	```cpp #include <vector> bool has_consecutive_elements(const std::vector<int>& numbers) { for (int i = 0; i < numbers.size() - 1; i++) { if (numbers[i] + 1 == numbers[i + 1]) { return true; } } return false; }
Write a function that calculates the average of all the numbers in a given list of floating point numbers.	```cpp #include <vector> #include <numeric> float calculateAverage(std::vector<float> numbers) { float sum = std::accumulate(numbers.begin(), numbers.end(), 0.0); float average = sum / numbers.size(); return average; }
Write a function that takes a string as input and returns the string in uppercase.	```cpp #include <string> #include <algorithm> std::string toUppercase(std::string str) { std::transform(str.begin(), str.end(), str.begin(), ::toupper); return str; }
Write a function that takes a list of integers and returns a new list that contains only the even numbers from the original list.	```cpp #include <vector> std::vector<int> getEvenNumbers(std::vector<int> numbers) { std::vector<int> evenNumbers; for (int num : numbers) { if (num % 2 == 0) { evenNumbers.push_back(num); } } return evenNumbers; }
Write a function that takes a string as input and returns true if the string is a palindrome, false otherwise.	```cpp #include <string> bool isPalindrome(std::string str) { std::string reversedStr = str; std::reverse(reversedStr.begin(), reversedStr.end()); return str == reversedStr; }
Write a function that takes a list of strings as input and returns the string that has the maximum length.	```cpp #include <vector> #include <algorithm> std::string getLongestString(std::vector<std::string> strings) { return *std::max_element(strings.begin(), strings.end(), [](std::string a, std::string b) { return a.size() < b.size(); }); }
Write a function that takes a string as input and returns the number of vowels in the string.	```cpp #include <iostream> #include <string> using namespace std; int count_vowels(string s) { int count = 0; for (int i = 0; i < s.length(); i++) { char c = tolower(s[i]); if (c == 'a' || c == 'e' || c == 'i' || c == 'o' || c == 'u') { count++; } } return count; }
Develop a function to find the maximum value in a 2D array.	```cpp #include <iostream> #include <vector> using namespace std; int find_max_value(vector<vector<int>> arr) { int max_val = arr[0][0]; for (int i = 0; i < arr.size(); i++) { for (int j = 0; j < arr[i].size(); j++) { if (arr[i][j] > max_val) { max_val = arr[i][j]; } } } return max_val; }
Create a function to reverse the order of words in a given string.	```cpp #include <iostream> #include <string> #include <vector> using namespace std; string reverse_words(string s) { vector<string> words; string word = ""; for (int i = 0; i < s.length(); i++) { if (s[i] == ' ') { words.push_back(word); word = ""; } else { word += s[i]; } } words.push_back(word); string reversed = ""; for (int i = words.size() - 1; i >= 0; i--) { reversed += words[i] + " "; } re…
You are given a string of parentheses as input. Write a function `are_parentheses_balanced` that takes this string as an input and returns true if the parentheses are balanced, otherwise false.	```cpp #include <iostream> #include <string> #include <stack> using namespace std; bool are_parentheses_balanced(string s) { stack<char> parentheses; for (int i = 0; i < s.length(); i++) { if (s[i] == '(') { parentheses.push(s[i]); } else if (s[i] == ')') { if (parentheses.empty()) { return false; } parentheses.pop(); } } return parentheses.empty(); }
Implement a function that takes a list of integers as input and returns the second largest number in the list.	```cpp #include <iostream> #include <vector> using namespace std; int find_second_largest(vector<int> nums) { int max_num = nums[0]; int second_max_num = INT_MIN; for (int i = 1; i < nums.size(); i++) { if (nums[i] > max_num) { second_max_num = max_num; max_num = nums[i]; } else if (nums[i] > second_max_num && nums[i] != max_num) { second_max_num = nums[i]; } } return second_max_num; }
Write a C++ function to calculate the average of a list of float numbers.	```c #include <iostream> #include <vector> float average_list(const std::vector<float>& numbers) { float sum = 0.0; for (float num : numbers) { sum += num; } return sum / numbers.size(); }
Create a function called `palindrome_check` that takes a string as an input and returns true if the string is a palindrome, false otherwise.	```c #include <iostream> #include <string> bool palindrome_check(const std::string& str) { int start = 0; int end = str.length() - 1; while (start < end) { if (str[start] != str[end]) { return false; } start++; end--; } return true; }
Implement a C++ function named `find_largest` that takes three integers as input and returns the largest of the three numbers.	```c #include <iostream> int find_largest(int a, int b, int c) { if (a >= b && a >= c) { return a; } else if (b >= a && b >= c) { return b; } else { return c; } }
Write a C++ function to find the middle element of a linked list.	```c #include <iostream> struct Node { int data; Node* next; }; int middle_element(Node* head) { Node* slow = head; Node* fast = head; while (fast != nullptr && fast->next != nullptr) { slow = slow->next; fast = fast->next->next; } return slow->data; }
Create a function called `gcd_calculator` that takes two integers as input and returns their greatest common divisor using Euclid's algorithm.	```c #include <iostream> int gcd_calculator(int a, int b) { while (b != 0) { int temp = b; b = a % b; a = temp; } return a; } ```
Write a function to count the number of occurrences of each digit in a given integer. The function should return a map where the keys are the digits (0-9) and the values are their respective counts.	```c++ map<int, int> countDigits(int num) { map<int, int> digitCounts; while (num > 0) { int digit = num % 10; digitCounts[digit]++; num /= 10; } return digitCounts; }
Write a function to remove the first occurrence of a specified element from a given vector of integers. The function should return the modified vector.	```c++ vector<int> removeFirstOccurrence(vector<int> vec, int elem) { auto it = find(vec.begin(), vec.end(), elem); if (it != vec.end()) { vec.erase(it); } return vec; }
Write a function to find the maximum sum of a subarray within a given array of integers. The function should return the maximum sum.	```c++ int maxSubarraySum(vector<int> arr) { int maxSum = INT_MIN; int currentSum = 0; for (int num : arr) { currentSum = max(num, currentSum + num); maxSum = max(maxSum, currentSum); } return maxSum; }
Write a function to find the longest common prefix among an array of strings. The function should return the longest common prefix.	```c++ string longestCommonPrefix(vector<string> strs) { if (strs.empty()) return ""; string prefix = strs[0]; for (int i = 1; i < strs.size(); i++) { while (strs[i].find(prefix) != 0) { prefix.pop_back(); if (prefix.empty()) return ""; } } return prefix; }
Write a function to check if a given string is a palindrome. The function should return a boolean value indicating whether the string is a palindrome.	```c++ bool isPalindrome(string str) { int left = 0, right = str.size() - 1; while (left < right) { if (str[left] != str[right]) return false; left++; right--; } return true; }
Write a function that takes two strings s1 and s2 as input and returns True if they are anagrams of each other and False otherwise.	``` #include <algorithm> #include <string> bool areAnagrams(std::string s1, std::string s2) { if (s1.length() != s2.length()) { return false; } std::sort(s1.begin(), s1.end()); std::sort(s2.begin(), s2.end()); return s1 == s2; }
Write a function that takes a list of integers as input and returns the maximum sum of a contiguous subarray within the list.	``` #include <vector> #include <algorithm> int maxSubarraySum(std::vector<int> nums) { int maxSum = nums[0]; int currentSum = nums[0]; for (int i = 1; i < nums.size(); i++) { currentSum = std::max(nums[i], currentSum + nums[i]); maxSum = std::max(maxSum, currentSum); } return maxSum; }
Create a function that takes a list of strings as input and returns a new list with all strings in uppercase.	``` #include <vector> #include <string> #include <algorithm> std::vector<std::string> toUppercase(std::vector<std::string> strs) { std::vector<std::string> uppercaseStrs; for (const std::string& str : strs) { std::string uppercaseStr = str; std::transform(uppercaseStr.begin(), uppercaseStr.end(), uppercaseStr.begin(), ::toupper); uppercaseStrs.push_back(uppercaseStr); } return uppercaseStrs; }
Write a function that takes a list of integers as input and returns the index of the first occurrence of the maximum value in the list.	``` #include <vector> #include <algorithm> int maxIndex(std::vector<int> nums) { return std::distance(nums.begin(), std::max_element(nums.begin(), nums.end())); }
Create a function that takes a string as input and returns the string with all vowels removed.	``` #include <string> std::string removeVowels(std::string s) { std::string sWithoutVowels; for (char c : s) { if (c != 'a' && c != 'e' && c != 'i' && c != 'o' && c != 'u' && c != 'A' && c != 'E' && c != 'I' && c != 'O' && c != 'U') { sWithoutVowels += c; } } return sWithoutVowels; }
Write a function that takes two integers as input and returns their greatest common divisor using the Euclidean algorithm.	```cpp int findGCD(int a, int b) { if (b == 0) return a; else return findGCD(b, a % b); }
Write a function that takes a string as input and returns the number of uppercase letters in the string.	```cpp int countUppercase(const std::string& str) { int count = 0; for (char c : str) { if (isupper(c)) count++; } return count; }
Write a function that takes a vector of integers as input and returns the second largest element in the vector.	```cpp int findSecondLargest(const std::vector<int>& vec) { int max = vec[0]; int secondMax = vec[0]; for (int num : vec) { if (num > max) { secondMax = max; max = num; } else if (num > secondMax && num != max) { secondMax = num; } } return secondMax; }
Write a function that takes a string as input and returns true if the string is a palindrome, false otherwise.	```cpp bool isPalindrome(const std::string& str) { std::string reversedStr = str; std::reverse(reversedStr.begin(), reversedStr.end()); return str == reversedStr; }
Write a function that takes an integer as input and returns the sum of its digits.	```cpp int sumOfDigits(int num) { int sum = 0; while (num != 0) { sum += num % 10; num /= 10; } return sum; }
Write a functioncalled frequentCharacter that takes a string as input and returns a character that appears most frequently in the string.	```cpp #include <iostream> #include <map> using namespace std; char frequentCharacter(string s) { map<char, int> charMap; for (char c : s) { if (charMap.find(c) != charMap.end()) { charMap[c]++; } else { charMap[c] = 1; } } char mostFrequent = s[0]; int maxCount = 0; for (auto &pair : charMap) { if (pair.second > maxCount) { maxCount = pair.second; mostFrequent = pair.first; } } return mostFreque…
Write a function called duplicateArray that takes an array of integers and its size as input and returns the array with all duplicate elements removed.	```cpp #include <iostream> #include <set> using namespace std; int* duplicateArray(int arr[], int n) { set<int> uniqueSet(arr, arr + n); int* result = new int[uniqueSet.size()]; int i = 0; for (int num : uniqueSet) { result[i++] = num; } return result; }
Write a function called smallestSubarray that takes an array of integers and its size as input and returns the smallest subarray that contains at least one occurrence of each element in the array.	```cpp #include <iostream> #include <map> using namespace std; int* smallestSubarray(int arr[], int n) { map<int, int> lastIndex; for (int i = 0; i < n; i++) { lastIndex[arr[i]] = i; } int minIndex = 0, maxIndex = 0; for (auto &pair : lastIndex) { if (pair.second < minIndex) { minIndex = pair.second; } if (pair.second > maxIndex) { maxIndex = pair.second; } } int* result = new int[maxIndex - minI…
Write a function called divisiblePairs that takes an array of integers and its size as input and returns the number of pairs of integers in the array that have a sum divisible by 3.	```cpp #include <iostream> using namespace std; int divisiblePairs(int arr[], int n) { int count[3] = {0}; for (int i = 0; i < n; i++) { count[arr[i] % 3]++; } return count[0] * (count[0] - 1) / 2 + count[1] * count[2]; }
Write a function called largestPermutation that takes an array of integers and its size as input and returns the largest permutation of the array that can be obtained by swapping at most one pair of elements.	```cpp #include <iostream> #include <algorithm> using namespace std; int* largestPermutation(int arr[], int n) { int* result = new int[n]; copy(arr, arr + n, result); int maxIndex = max_element(result, result + n) - result; int firstIndex = -1; for (int i = 0; i < n; i++) { if (result[i] != arr[i]) { firstIndex = i; break; } } if (firstIndex != -1) { swap(result[firstIndex], result[maxIndex]); } …
Implement a C++ function to calculate the sum of squares of all numbers in a given array of integers.	```cpp #include <iostream> using namespace std; int sumOfSquares(int arr[], int n) { int sum = 0; for (int i = 0; i < n; i++) { sum += arr[i] * arr[i]; } return sum; } int main() { int arr[] = {1, 2, 3, 4, 5}; int n = sizeof(arr) / sizeof(arr[0]); cout << "Sum of squares: " << sumOfSquares(arr, n) << endl; return 0; }
Write a C++ function that takes a character array as input and returns the reverse of the given string.	```cpp #include <iostream> using namespace std; void reverseString(char str[]) { int start = 0; int end = strlen(str) - 1; while (start < end) { char temp = str[start]; str[start] = str[end]; str[end] = temp; start++; end--; } } int main() { char str[] = "Hello World"; reverseString(str); cout << "Reversed string: " << str << endl; return 0; }
Implement a C++ function to find the maximum element in a given array of integers.	```cpp #include <iostream> using namespace std; int findMax(int arr[], int n) { int max = arr[0]; for (int i = 1; i < n; i++) { if (arr[i] > max) { max = arr[i]; } } return max; } int main() { int arr[] = {10, 20, 30, 40, 50}; int n = sizeof(arr) / sizeof(arr[0]); cout << "Maximum element: " << findMax(arr, n) << endl; return 0; }
Write a C++ function that takes a string as input and returns the string with all vowels removed.	```cpp #include <iostream> #include <string> using namespace std; string removeVowels(string str) { string result = ""; for (int i = 0; i < str.length(); i++) { char c = tolower(str[i]); if (c != 'a' && c != 'e' && c != 'i' && c != 'o' && c != 'u') { result += str[i]; } } return result; } int main() { string str = "Hello World"; cout << "String with vowels removed: " << removeVowels(str) << endl;…
Implement a C++ function to find the first duplicate element in a given array of integers.	```cpp #include <iostream> using namespace std; int findFirstDuplicate(int arr[], int n) { for (int i = 0; i < n; i++) { for (int j = i + 1; j < n; j++) { if (arr[i] == arr[j]) { return arr[i]; } } } return -1; // Return -1 if no duplicate found } int main() { int arr[] = {1, 2, 3, 4, 2, 5}; int n = sizeof(arr) / sizeof(arr[0]); cout << "First duplicate element: " << findFirstDuplicate(arr, n) <<…
Write a function that takes an integer as input and returns true if the number is prime, otherwise returns false.	bool isPrime(int n) { if (n <= 1) { return false; } for (int i = 2; i * i <= n; i++) { if (n % i == 0) { return false; } } return true; }
Write a function that takes a list of strings as input and returns the string with the maximum length.	#include <iostream> #include <vector> #include <algorithm> std::string longestString(const std::vector<std::string>& strings) { if (strings.empty()) { return ""; } return *std::max_element(strings.begin(), strings.end(), [](const std::string& a, const std::string& b) { return a.size() < b.size(); }); }
Create a function that takes a list of integers as input and returns the count of even numbers.	#include <iostream> #include <vector> int countEvens(const std::vector<int>& numbers) { int count = 0; for (int num : numbers) { if (num % 2 == 0) { count++; } } return count; }
Write a function that takes a 2D vector of integers as input and returns the sum of the diagonal elements.	#include <iostream> #include <vector> int sumDiagonal(const std::vector<std::vector<int>>& matrix) { int sum = 0; for (int i = 0; i < matrix.size(); i++) { sum += matrix[i][i]; } return sum; }
Develop a function that takes a list of integers as input and returns the second largest number.	#include <iostream> #include <vector> #include <algorithm> int secondLargest(const std::vector<int>& numbers) { if (numbers.size() < 2) { return -1; // Return -1 if the list has less than 2 elements } std::vector<int> sortedNumbers = numbers; std::sort(sortedNumbers.begin(), sortedNumbers.end(), std::greater<int>()); return sortedNumbers[1]; }
Write a function that takes a list of strings as input and returns the count of strings that start with a vowel.	#include <iostream> #include <vector> #include <cctype> int countVowelStrings(const std::vector<std::string>& strings) { int count = 0; for (const std::string& str : strings) { char firstChar = std::tolower(str[0]); if (firstChar == 'a' || firstChar == 'e' || firstChar == 'i' || firstChar == 'o' || firstChar == 'u') { count++; } } return count; }
Write a C++ function that takes a 2-dimensional vector as input and returns the sum of all elements in the 2-dimensional vector.	int sum2dVector(vector<vector<int>>& vec) { int sum = 0; for (int i = 0; i < vec.size(); i++) { for (int j = 0; j < vec[i].size(); j++) { sum += vec[i][j]; } } return sum; }
Write a C++ function that takes a string as input and returns a new string with all lowercase letters converted to uppercase.	string toUpperCase(string str) { for (int i = 0; i < str.length(); i++) { if (str[i] >= 'a' && str[i] <= 'z') { str[i] = str[i] - 32; } } return str; }
Write a C++ function that takes a vector of integers as input and returns the count of all prime numbers in the vector.	bool isPrime(int n) { if (n <= 1) return false; for (int i = 2; i * i <= n; i++) { if (n % i == 0) return false; } return true; } int countPrimes(vector<int>& vec) { int count = 0; for (int i = 0; i < vec.size(); i++) { if (isPrime(vec[i])) count++; } return count; }
Write a C++ function that takes a vector of floats as input and returns the average of all elements in the vector.	float averageVector(vector<float>& vec) { float sum = 0.0; for (int i = 0; i < vec.size(); i++) { sum += vec[i]; } return sum / vec.size(); }
Write a C++ function that takes a string as input and returns a new string with all characters in reverse order.	string reverseString(string str) { string revStr; for (int i = str.length() - 1; i >= 0; i--) { revStr += str[i]; } return revStr; }
Write a function that takes a vector of integers as input and returns the count of even numbers in the vector.	```cpp int countEvenNumbers(vector<int> numbers) { int count = 0; for (int num : numbers) { if (num % 2 == 0) { count++; } } return count; }
Write a function that takes two vectors of integers as input and returns a new vector with the elements that are common to both vectors.	```cpp vector<int> findCommonElements(vector<int> vec1, vector<int> vec2) { vector<int> commonElements; for (int num : vec1) { if (find(vec2.begin(), vec2.end(), num) != vec2.end()) { commonElements.push_back(num); } } return commonElements; }
Create a function that takes a string as input and returns the string with all vowels removed.	```cpp string removeVowels(string str) { string noVowels; for (char c : str) { if (c == 'a' || c == 'e' || c == 'i' || c == 'o' || c == 'u' || c == 'A' || c == 'E' || c == 'I' || c == 'O' || c == 'U') { continue; } noVowels += c; } return noVowels; }
Write a function that takes a vector of strings as input and returns the count of strings that start with a vowel.	```cpp int countStringsStartingWithVowel(vector<string> strings) { int count = 0; for (string str : strings) { char firstChar = tolower(str[0]); if (firstChar == 'a' || firstChar == 'e' || firstChar == 'i' || firstChar == 'o' || firstChar == 'u') { count++; } } return count; }
Create a function that takes a vector of integers as input and returns the maximum difference between any two elements in the vector.	```cpp int findMaxDifference(vector<int> numbers) { if (numbers.size() < 2) { return 0; } int maxDiff = numbers[1] - numbers[0]; int minElement = numbers[0]; for (int i = 1; i < numbers.size(); i++) { if (numbers[i] - minElement > maxDiff) { maxDiff = numbers[i] - minElement; } if (numbers[i] < minElement) { minElement = numbers[i]; } } return maxDiff; }
Write a function that takes a string as input and returns true if the string is a palindrome, false otherwise.	bool isPalindrome(string s) { int start = 0; int end = s.length() - 1; while (start < end) { if (s[start] != s[end]) { return false; } start++; end--; } return true; }
Create a function that calculates the area of a circle given its radius.	double calculateCircleArea(double radius) { const double PI = 3.14159; double area = PI * radius * radius; return area; }
Write a function that finds the maximum value in a given 2D array.	int findMaxIn2DArray(vector<vector<int>> arr) { int max_val = arr[0][0]; for (int i = 0; i < arr.size(); i++) { for (int j = 0; j < arr[i].size(); j++) { if (arr[i][j] > max_val) { max_val = arr[i][j]; } } } return max_val; }
Create a function that calculates the sum of all digits in a given integer.	int sumOfDigits(int num) { int sum = 0; while (num > 0) { sum += num % 10; num /= 10; } return sum; }
Write a function that takes a list of integers as input and returns the count of even numbers in the list.	int countEvenNumbers(vector<int> numbers) { int count = 0; for (int num : numbers) { if (num % 2 == 0) { count++; } } return count; }
Write a function to find the factorial of a given number 'n', where 'n' is an input.	```cpp int factorial(int n) { int result = 1; for(int i = 1; i <= n; i++) { result *= i; } return result; }
Write a function that takes a string as input and returns the count of vowels in the string.	```cpp int countVowels(string str) { int count = 0; for(int i = 0; i < str.length(); i++) { char c = tolower(str[i]); if(c == 'a' || c == 'e' || c == 'i' || c == 'o' || c == 'u') { count++; } } return count; }
Create a function that calculates the total cost of items in a shopping cart. The function should take in a vector of pairs where each pair contains the price and quantity of an item.	```cpp double calculateTotalCost(vector<pair<double, int>> cart) { double totalCost = 0.0; for(auto item : cart) { totalCost += item.first * item.second; } return totalCost; }
Write a function to find the minimum value in a 2D vector of integers, without using the built-in min() function.	```cpp int findMinIn2DVector(vector<vector<int>> vec) { int minVal = vec[0][0]; for(auto row : vec) { for(auto val : row) { if(val < minVal) { minVal = val; } } } return minVal; }
Write a function to check if a given string is a palindrome, ignoring the case of characters.	```cpp bool isPalindrome(string str) { int start = 0; int end = str.length() - 1; while(start < end) { if(tolower(str[start]) != tolower(str[end])) { return false; } start++; end--; } return true; }
Create a function that takes in two lists of integers representing two vectors and calculates the dot product of the two vectors.	```cpp #include <vector> int calculateDotProduct(const std::vector<int>& vector1, const std::vector<int>& vector2) { int dotProduct = 0; if (vector1.size() == vector2.size()) { for (int i = 0; i < vector1.size(); i++) { dotProduct += vector1[i] * vector2[i]; } } else { throw std::invalid_argument("Vectors must be of the same size to calculate dot product."); } return dotProduct; }
Implement a function that takes a string as input and checks if the string is in all lowercase characters.	```cpp #include <string> bool isAllLowerCase(const std::string& str) { for (char c : str) { if (!islower(c)) { return false; } } return true; }
Design a function that takes a list of integers as input and returns the count of numbers that are greater than 5.	```cpp #include <vector> int countGreaterThanFive(const std::vector<int>& numbers) { int count = 0; for (int num : numbers) { if (num > 5) { count++; } } return count; }
Create a function that takes in a string and checks if it starts with a specified prefix.	```cpp #include <string> bool startsWithPrefix(const std::string& str, const std::string& prefix) { return str.find(prefix) == 0; }
Write a function that takes in a list of integers and returns the count of prime numbers in the list.	```cpp #include <vector> bool isPrime(int num) { if (num <= 1) { return false; } for (int i = 2; i * i <= num; i++) { if (num % i == 0) { return false; } } return true; } int countPrimeNumbers(const std::vector<int>& numbers) { int count = 0; for (int num : numbers) { if (isPrime(num)) { count++; } } return count; }
Write a function called isPrime that takes a positive integer as an input and checks if the number is a prime number or not. The function should return true if the number is prime and false if it is not.	bool isPrime(int num) { if (num <= 1) return false; for (int i = 2; i * i <= num; i++) { if (num % i == 0) return false; } return true; }
Create a function called calculateFine that calculates the fine for a book returned late. The function takes three parameters: the number of days the book is overdue, the fine per day, and the maximum fine. It should return the calculated fine.	int calculateFine(int days, int finePerDay, int maxFine) { if (days <= 0) return 0; int fine = days * finePerDay; if (fine > maxFine) return maxFine; return fine; }
Write a function called findMin that takes an array of integers as an input and returns the smallest element in the array.	int findMin(int arr[], int size) { int min = arr[0]; for (int i = 1; i < size; i++) { if (arr[i] < min) min = arr[i]; } return min; }
Create a function called gcd that takes two integers as an input and returns their greatest common divisor (GCD).	int gcd(int a, int b) { if (b == 0) return a; return gcd(b, a % b); }
Write a function called areAnagrams that takes two strings as an input and checks if they are anagrams of each other. The function should return true if they are anagrams and false otherwise.	#include <algorithm> bool areAnagrams(string str1, string str2) { if (str1.length() != str2.length()) return false; sort(str1.begin(), str1.end()); sort(str2.begin(), str2.end()); return str1 == str2; }
Write a function that takes a list of integers as input and returns the count of prime numbers in the list.	```cpp #include <vector> #include <cmath> bool isPrime(int num) { if (num <= 1) return false; if (num <= 3) return true; if (num % 2 == 0 || num % 3 == 0) return false; for (int i = 5; i <= sqrt(num); i = i + 6) if (num % i == 0 || num % (i + 2) == 0) return false; return true; } int countPrimeNumbers(const std::vector<int>& numbers) { int count = 0; for (int num : numbers) { if (isPrime(num)) co…
Write a function that takes a list of strings as input and returns a new list with all strings converted to uppercase.	```cpp #include <vector> #include <algorithm> #include <string> std::vector<std::string> toUppercase(const std::vector<std::string>& strings) { std::vector<std::string> uppercaseStrings; for (const std::string& str : strings) { std::string uppercaseStr = str; std::transform(uppercaseStr.begin(), uppercaseStr.end(), uppercaseStr.begin(), ::toupper); uppercaseStrings.push_back(uppercaseStr); } retu…
Write a function that takes a string as input and returns the longest substring without repeating characters.	```cpp #include <string> #include <unordered_map> std::string longestSubstringWithoutRepeatingChars(const std::string& str) { std::unordered_map<char, int> charIndexMap; int start = 0; int maxLength = 0; int maxStart = 0; for (int end = 0; end < str.length(); end++) { char c = str[end]; if (charIndexMap.find(c) != charIndexMap.end()) { start = std::max(start, charIndexMap[c] + 1); } charIndexMap[…
Write a function that takes a list of integers as input and returns a new list with all elements in descending order.	```cpp #include <vector> #include <algorithm> std::vector<int> sortDescending(const std::vector<int>& numbers) { std::vector<int> sortedNumbers = numbers; std::sort(sortedNumbers.begin(), sortedNumbers.end(), std::greater<int>()); return sortedNumbers; } return;
Write a function that takes a string as input and returns the string with all spaces removed.	```cpp #include <string> std::string removeSpaces(const std::string& str) { std::string spaceRemovedStr = str; spaceRemovedStr.erase(std::remove(spaceRemovedStr.begin(), spaceRemovedStr.end(), ' '), spaceRemovedStr.end()); return spaceRemovedStr; } return;
Write a C++ function named "countVowels" that accepts a string as input and returns the count of vowels in the string.	#include <iostream> #include <string> using namespace std; int countVowels(string str) { int count = 0; for (char c : str) { switch (tolower(c)) { case 'a': case 'e': case 'i': case 'o': case 'u': count++; } } return count; }
Design a C++ function named "findMaxElement" that accepts a vector of integers as input and returns the maximum element in the vector.	#include <iostream> #include <vector> #include <algorithm> using namespace std; int findMaxElement(vector<int> vec) { return *max_element(vec.begin(), vec.end()); }
Write a C++ function named "checkPalindrome" that accepts a string as input and returns true if the string is a palindrome, and false otherwise.	#include <iostream> #include <string> using namespace std; bool checkPalindrome(string str) { string reversedStr = str; reverse(reversedStr.begin(), reversedStr.end()); return str == reversedStr; }
Design a C++ function named "computeAverage" that accepts a vector of floating-point numbers as input and returns the average of the numbers in the vector.	#include <iostream> #include <vector> using namespace std; double computeAverage(vector<double> vec) { double sum = 0.0; for (double num : vec) { sum += num; } return sum / vec.size(); }
Write a C++ function named "removeDuplicates" that accepts a vector of integers as input, removes duplicates from the vector, and returns the modified vector.	#include <iostream> #include <vector> #include <set> using namespace std; vector<int> removeDuplicates(vector<int> vec) { set<int>.uniqueElements(vec.begin(), vec.end()); return vector<int>(uniqueElements.begin(), uniqueElements.end()); }
Write a function that takes a string as input and returns the string in uppercase.	void uppercaseString(string str) { for(int i=0; i<str.length(); i++) { str[i] = toupper(str[i]); } cout << str << endl; }
Implement a function that takes a list of integers as input, reverses the list, and returns the reversed list.	vector<int> reverseList(vector<int> list) { reverse(list.begin(), list.end()); return list; }
Write a function that takes two integers as input and returns their greatest common divisor (GCD).	int gcd(int a, int b) { if (b == 0) return a; else return gcd(b, a % b); }
Implement a function that takes a list of strings as input and returns the longest string in the list.	string longestString(vector<string> list) { string longest = ""; for(string str : list) { if(str.length() > longest.length()) { longest = str; } } return longest; }
Write a function that takes an integer as input and returns True if the integer is a prime number, False otherwise.	bool isPrime(int num) { if (num <= 1) { return false; } for (int i = 2; i * i <= num; i++) { if (num % i == 0) { return false; } } return true; }
Calculate the sum of all odd numbers in a given array.	```cpp int calculateOddSum(int arr[], int n) { int total_sum = 0; for(int i = 0; i < n; i++) { if(arr[i] % 2 != 0) { total_sum += arr[i]; } } return total_sum; }
Check if a given string is a palindrome.	```cpp bool isPalindrome(string str) { int start = 0; int end = str.length() - 1; while(start < end) { if(str[start] != str[end]) { return false; } start++; end--; } return true; }
Count the frequency of each word in a given sentence.	```cpp map<string, int> countWordFrequency(string sentence) { map<string, int> word_frequency; stringstream ss(sentence); string word; while (ss >> word) { if(word_frequency.find(word) != word_frequency.end()) { word_frequency[word]++; } else { word_frequency[word] = 1; } } return word_frequency; }
Find the maximum element in a given matrix.	```cpp int findMaxElement(int matrix[][3], int n, int m) { int max_element = matrix[0][0]; for(int i = 0; i < n; i++) { for(int j = 0; j < m; j++) { if(matrix[i][j] > max_element) { max_element = matrix[i][j]; } } } return max_element; }
Determine if a given number is a prime number.	```cpp bool isPrime(int num) { if(num <= 1) { return false; } for(int i = 2; i * i <= num; i++) { if(num % i == 0) { return false; } } return true; }
Create a function that takes a string input and returns the number of vowels in the string.	```cpp int countVowels(const std::string& s) { int count = 0; for (char c : s) { if (c == 'a' || c == 'e' || c == 'i' || c == 'o' || c == 'u' || c == 'A' || c == 'E' || c == 'I' || c == 'O' || c == 'U') { count++; } } return count; }
Write a function that takes a vector of integers as input and returns the maximum value in the vector.	```cpp int findMax(const std::vector<int>& vec) { int maxVal = vec[0]; for (int i = 1; i < vec.size(); i++) { if (vec[i] > maxVal) { maxVal = vec[i]; } } return maxVal; }
Write a function that takes two strings as input and returns true if the second string is a substring of the first string, false otherwise.	```cpp bool isSubstring(const std::string& s1, const std::string& s2) { return s1.find(s2) != std::string::npos; }
Write a function that takes an integer n as input and returns the sum of the digits of n.	```cpp int sumDigits(int n) { int sum = 0; while (n > 0) { sum += n % 10; n /= 10; } return sum; }
Write a function that takes a vector of strings as input and returns a new vector that contains only the strings of length 5 or more.	```cpp std::vector<std::string> filterStrings(const std::vector<std::string>& vec) { std::vector<std::string> filteredVec; for (const std::string& s : vec) { if (s.length() >= 5) { filteredVec.push_back(s); } } return filteredVec; }
Write a C++ function to count the number of occurrences of a specific character in a given string.	#include<iostream> #include<string> using namespace std; int countCharacterOccurrences(string str, char c) { int count = 0; for(int i=0; i<str.length(); i++) { if(str[i] == c) { count++; } } return count; }
Create a C++ function that takes a vector of integers as input and returns the maximum absolute difference between any two elements in the vector.	#include<vector> #include<algorithm> #include<iostream> using namespace std; int maxAbsoluteDifference(vector<int> vec) { int max_element = *max_element(vec.begin(), vec.end()); int min_element = *min_element(vec.begin(), vec.end()); return abs(max_element - min_element); }
Write a C++ function to remove all duplicates from a given sorted array and return the new length of the array.	#include<iostream> using namespace std; int removeDuplicates(int arr[], int n) { if(n == 0 || n == 1) { return n; } int j = 0; for(int i = 0; i < n-1; i++) { if(arr[i] != arr[i+1]) { arr[++j] = arr[i+1]; } } return j + 1; }
Create a C++ function that takes a vector of integers as input and returns the count of pairs with equal elements.	#include<vector> #include<iostream> #include<unordered_map> using namespace std; int countEqualPairs(vector<int> vec) { int count = 0; unordered_map<int, int> map; for(int i = 0; i < vec.size(); i++) { map[vec[i]]++; } for(auto it = map.begin(); it != map.end(); it++) { count += (it->second * (it->second - 1)) / 2; } return count; }
Write a C++ function to find the longest common prefix among all elements in a given vector of strings.	#include<vector> #include<string> #include<algorithm> using namespace std; string longestCommonPrefix(vector<string> vec) { if(vec.size() == 0) { return ""; } sort(vec.begin(), vec.end()); string prefix = vec[0]; for(int i = 1; i < vec.size(); i++) { while(vec[i].find(prefix) != 0) { prefix.pop_back(); } } return prefix; }
Write a C++ function that takes a string as input and returns the string with all vowels removed.	#include<bits/stdc++.h> using namespace std; string stringRemoveVowels(string str) { string result = ""; for(int i = 0; i < str.length(); i++) { char c = tolower(str[i]); if(c != 'a' && c != 'e' && c != 'i' && c != 'o' && c != 'u') { result += str[i]; } } return result; }
Design a C++ function that takes a list of strings as input and returns the longest string in the list.	#include<bits/stdc++.h> using namespace std; string longestString(vector<string> strList) { string longestStr = ""; for(string str : strList) { if(str.length() > longestStr.length()) { longestStr = str; } } return longestStr; }
Write a C++ function that takes an integer as input and returns the number of digits in the integer.	#include<bits/stdc++.h> using namespace std; int digitsCount(int num) { int count = 0; while(num != 0) { num /= 10; count++; } return count; }
Develop a C++ function that takes a list of integers as input and returns the count of prime numbers in the list.	#include<bits/stdc++.h> using namespace std; bool isPrime(int num) { if(num <= 1) return false; for(int i = 2; i <= sqrt(num); i++) { if(num % i == 0) return false; } return true; } int countPrimeNumbers(vector<int> numList) { int count = 0; for(int num : numList) { if(isPrime(num)) count++; } return count; }
Write a C++ function that takes a list of integers as input and returns a new list with all negative numbers removed.	#include<bits/stdc++.h> using namespace std; vector<int> removeNegativeNumbers(vector<int> numList) { vector<int> result; for(int num : numList) { if(num >= 0) { result.push_back(num); } } return result; }
Write a C++ function that takes an integer N as input and returns the sum of digits of all numbers from 1 to N.	```cpp int sumDigitsFrom1ToN(int N) { int sum = 0; for (int i = 1; i <= N; i++) { int num = i; while (num > 0) { sum += num % 10; num /= 10; } } return sum; }
Write a C++ function that takes a vector of strings as input and returns a vector of strings that contain only the strings with an even length from the original vector.	```cpp vector<string> evenLengthStrings(vector<string>& input) { vector<string> output; for (string str : input) { if (str.length() % 2 == 0) { output.push_back(str); } } return output; }
Write a C++ function that takes a vector of integers as input and returns a vector of integers that contains each integer repeated three times.	```cpp vector<int> repeatThreeTimes(vector<int>& input) { vector<int> output; for (int num : input) { output.push_back(num); output.push_back(num); output.push_back(num); } return output; }
Write a C++ function that takes a vector of integers as input and returns the count of integers that are greater than their adjacent integers.	```cpp int countGreaterAdjacents(vector<int>& input) { int count = 0; for (int i = 1; i < input.size(); i++) { if (input[i] > input[i - 1]) { count++; } } return count; }
Write a C++ function that takes a vector of integers as input and returns a vector of integers that contains each integer raised to the power of 2.	```cpp vector<int> squareNumbers(vector<int>& input) { vector<int> output; for (int num : input) { output.push_back(num * num); } return output; }
Write a function, `count_chars`, that takes a string and a character as input, and returns the count of the number of times the character appears in the string.	int count_chars(string str, char ch) { int count = 0; for (int i = 0; i < str.length(); i++) { if (str[i] == ch) { count++; } } return count; }
Given a list of integers, write a function, `largest_sum`, that returns the largest possible sum of a contiguous sublist.	int largest_sum(vector<int> nums) { int max_current = nums[0]; int max_global = nums[0]; for (int i = 1; i < nums.size(); i++) { max_current = max(nums[i], max_current + nums[i]); if (max_current > max_global) { max_global = max_current; } } return max_global; }
Create a function, `is_anagram`, that takes two strings as input and returns true if they are anagrams of each other, and false otherwise.	bool is_anagram(string str1, string str2) { if (str1.length() != str2.length()) { return false; } sort(str1.begin(), str1.end()); sort(str2.begin(), str2.end()); return str1 == str2; }
Write a function, `flipping_bits`, that takes an integer as input and returns the integer with all its bits flipped.	int flipping_bits(int num) { return ~num; }
Given a list of strings, write a function, `most_frequent_string`, that returns the string that appears most frequently in the list.	string most_frequent_string(vector<string> strings) { map<string, int> freq; for (string str : strings) { freq[str]++; } int max_freq = 0; string most_freq_str; for (auto it = freq.begin(); it != freq.end(); it++) { if (it->second > max_freq) { max_freq = it->second; most_freq_str = it->first; } } return most_freq_str; }
Write a function `count_digits` that takes a positive integer as an input and returns the count of digits in the number.	```cpp int count_digits(int n) { int count = 0; while (n != 0) { n = n / 10; count++; } return count; }
Write a function `find_max` that takes an array of integers and its size as inputs and returns the maximum element in the array.	```cpp int find_max(int arr[], int size) { int max_element = arr[0]; for (int i = 1; i < size; i++) { if (arr[i] > max_element) { max_element = arr[i]; } } return max_element; }
Write a function `is_prime` that takes a positive integer as an input and returns 'Yes' if the number is prime, 'No' otherwise.	```cpp string is_prime(int n) { if (n <= 1) { return "No"; } for (int i = 2; i * i <= n; i++) { if (n % i == 0) { return "No"; } } return "Yes"; }
Write a function `remove_duplicates` that takes an array of integers and its size as inputs, removes duplicates from the array, and returns the new size of the array.	```cpp int remove_duplicates(int arr[], int size) { int new_size = 1; for (int i = 1; i < size; i++) { bool is_duplicate = false; for (int j = 0; j < i; j++) { if (arr[i] == arr[j]) { is_duplicate = true; break; } } if (!is_duplicate) { arr[new_size++] = arr[i]; } } return new_size; }
Write a function `find_middle` that takes a string as an input and returns the middle character(s) of the string.	```cpp string find_middle(string str) { int length = str.length(); string middle; if (length % 2 == 0) { middle += str[length / 2 - 1]; middle += str[length / 2]; } else { middle += str[length / 2]; } return middle; }
Write a function to find the nth Fibonacci number in a sequence.	```cpp int fibonacci(int n); // inputs: n: an integer specifying the position of the Fibonacci number // outputs: an integer representing the nth Fibonacci number // data types: int solution: int fibonacci(int n) { if(n <= 1) { return n; } return fibonacci(n-1) + fibonacci(n-2); }
Write a function to count the occurrences of each character in a given string.	```cpp unordered_map<char, int> charCount(string str); // inputs: str: a string of characters // outputs: an unordered map of characters to their counts // data types: string, unordered_map<char, int> solution: unordered_map<char, int> charCount(string str) { unordered_map<char, int> count; for(char c : str) { count[c]++; } return count; }
Write a function to find the maximum element in a binary tree.	```cpp int maxElement(TreeNode* root); // inputs: root: the root of a binary tree // outputs: an integer representing the maximum element in the tree // data types: TreeNode*, int solution: int maxElement(TreeNode* root) { if(root == nullptr) { return INT_MIN; } return max(root->val, max(maxElement(root->left), maxElement(root->right))); }
Write a function to check if a given matrix is symmetric.	```cpp bool isSymmetric(vector<vector<int>>& matrix); // inputs: matrix: a 2D vector of integers // outputs: a boolean indicating whether the matrix is symmetric // data types: vector<vector<int>>, bool solution: bool isSymmetric(vector<vector<int>>& matrix) { int n = matrix.size(); for(int i = 0; i < n; ++i) { for(int j = 0; j < i; ++j) { if(matrix[i][j] != matrix[j][i]) { return false; } } } re…
Write a function to remove all occurrences of a given element from a list.	```cpp vector<int> removeElement(vector<int>& list, int element); // inputs: list: a vector of integers, element: an integer to be removed // outputs: a vector of integers with all occurrences of the element removed // data types: vector<int>, int solution: vector<int> removeElement(vector<int>& list, int element) { list.erase(remove(list.begin(), list.end(), element), list.end()); return list; }
Write a C++ function to find the maximum element in a given array of integers.	#include <iostream> using namespace std; int findMaxElement(int arr[], int n) { int max = arr[0]; for (int i = 1; i < n; i++) { if (arr[i] > max) { max = arr[i]; } } return max; }
Write a C++ function to find the average of all elements in a given array of integers.	#include <iostream> using namespace std; float findAverage(int arr[], int n) { int sum = 0; for (int i = 0; i < n; i++) { sum += arr[i]; } float average = static_cast<float>(sum) / n; return average; }
Write a C++ function to count the number of times a specific value appears in a given array of integers.	#include <iostream> using namespace std; int countOccurrences(int arr[], int n, int val) { int count = 0; for (int i = 0; i < n; i++) { if (arr[i] == val) { count++; } } return count; }
Write a C++ function to reverse the elements of a given array of integers.	#include <iostream> using namespace std; void reverseArray(int arr[], int n) { int start = 0; int end = n - 1; while (start < end) { int temp = arr[start]; arr[start] = arr[end]; arr[end] = temp; start++; end--; } }
Write a C++ function to check if all elements in a given array of integers are distinct.	#include <iostream> using namespace std; bool areAllElementsDistinct(int arr[], int n) { for (int i = 0; i < n; i++) { for (int j = i + 1; j < n; j++) { if (arr[i] == arr[j]) { return false; } } } return true; }
Write a function that takes a list of integers as input and returns the count of odd numbers in the list.	``` #include <vector> int countOddNumbers(std::vector<int> numbers) { int count = 0; for (int number : numbers) { if (number % 2 != 0) { count++; } } return count; }
Write a function that takes a string as input and returns the string in uppercase.	``` #include <string> std::string toUpperCase(std::string str) { for (char &c : str) { c = toupper(c); } return str; }
Write a function that takes two integers as input and returns their sum if they are equal, otherwise returns their product.	``` #include <iostream> int calculate(int num1, int num2) { if (num1 == num2) { return num1 + num2; } else { return num1 * num2; } }
Write a function that takes a list of characters as input and returns a string formed by reversing the list.	``` #include <vector> #include <string> std::string reverseCharacters(std::vector<char> characters) { std::string str(characters.begin(), characters.end()); std::reverse(str.begin(), str.end()); return str; }
Write a function that takes a list of integers as input and returns the maximum value in the list.	``` #include <vector> #include <algorithm> int findMaximum(std::vector<int> numbers) { return *std::max_element(numbers.begin(), numbers.end()); }
Write a function that takes in two integers as input and returns their greatest common divisor (GCD).	```cpp int gcd(int a, int b) { if (b == 0) return a; else return gcd(b, a % b); } return;
Given a string, write a function that returns True if the string is a palindrome and False otherwise.	```cpp bool isPalindrome(string s) { int start = 0; int end = s.length() - 1; while (start < end) { if (s[start] != s[end]) return false; start++; end--; } return true; } return;
Write a function that takes in a list of integers as input and returns the number of negative elements in the list.	```cpp int countNegatives(vector<int> nums) { int count = 0; for (int num : nums) { if (num < 0) count++; } return count; } return;
Given a string, write a function that returns the string with all digits removed.	```cpp string removeDigits(string s) { string result = ""; for (char c : s) { if (!isdigit(c)) result += c; } return result; } return;
Write a function that takes in a list of integers as input and returns the maximum sum of a contiguous subarray within the list.	```cpp int maxSubarraySum(vector<int> nums) { int maxSum = INT_MIN; int currentSum = 0; for (int num : nums) { currentSum += num; if (currentSum > maxSum) maxSum = currentSum; if (currentSum < 0) currentSum = 0; } return maxSum; } return;
Write a C++ program that accepts two integers from the user and returns the greatest common divisor of the two integers.	```cpp #include <iostream> using namespace std; int greatest_common_divisor(int a, int b) { if (b == 0) return a; else return greatest_common_divisor(b, a % b); } int main() { int a, b; cout << "Enter two integers: "; cin >> a >> b; cout << "Greatest common divisor: " << greatest_common_divisor(a, b); return 0; }
Write a C++ function that takes a string as input and returns the string with all vowels removed.	```cpp #include <iostream> #include <string> using namespace std; string remove_vowels(string str) { string result = ""; for (int i = 0; i < str.length(); i++) { char c = tolower(str[i]); if (c != 'a' && c != 'e' && c != 'i' && c != 'o' && c != 'u') result += str[i]; } return result; } int main() { string str; cout << "Enter a string: "; getline(cin, str); cout << "String with all vowels removed:…
Write a C++ program that accepts an integer input from the user and prints out all the even numbers up to and including the input number.	```cpp #include <iostream> using namespace std; void print_even_numbers(int n) { for (int i = 2; i <= n; i += 2) cout << i << " "; cout << endl; } int main() { int n; cout << "Enter an integer: "; cin >> n; print_even_numbers(n); return 0; }
Write a C++ function that takes a list of integers as input and returns the sum of all the odd numbers in the list.	```cpp #include <iostream> #include <vector> using namespace std; int sum_odd_numbers(vector<int> arr) { int sum = 0; for (int i = 0; i < arr.size(); i++) { if (arr[i] % 2 != 0) sum += arr[i]; } return sum; } int main() { vector<int> arr = {1, 2, 3, 4, 5, 6}; cout << "Sum of all odd numbers: " << sum_odd_numbers(arr); return 0; }
Create a C++ program that takes a list of characters as input and returns the character that appears most frequently.	```cpp #include <iostream> #include <vector> #include <unordered_map> using namespace std; char most_frequent_char(vector<char> chars) { unordered_map<char, int> freq; char max_char; int max_count = 0; for (char c : chars) { freq[c]++; if (freq[c] > max_count) { max_count = freq[c]; max_char = c; } } return max_char; } int main() { vector<char> chars = {'a', 'b', 'c', 'a', 'a', 'b'}; cout << "Mos…
You are given a list of N integers, write a C++ function to find the maximum element.	```cpp int findMaxElement(vector<int> numbers) { int maxElement = numbers[0]; for (int i = 1; i < numbers.size(); i++) { if (numbers[i] > maxElement) { maxElement = numbers[i]; } } return maxElement; }
Write a function that takes a list of integers as input and returns the product of all the odd numbers in the list.	```cpp int productOfOddNumbers(vector<int> numbers) { int product = 1; for (int i = 0; i < numbers.size(); i++) { if (numbers[i] % 2 != 0) { product *= numbers[i]; } } return product; }
You are given a list of N strings, write a C++ function to find the string with the maximum length.	```cpp string findLongestString(vector<string> strings) { string longestString = strings[0]; for (int i = 1; i < strings.size(); i++) { if (strings[i].length() > longestString.length()) { longestString = strings[i]; } } return longestString; }
Write a function that takes a list of integers as input and returns the count of all the numbers that are divisible by 3 and 5.	```cpp int countDivisibleNumbers(vector<int> numbers) { int count = 0; for (int i = 0; i < numbers.size(); i++) { if (numbers[i] % 3 == 0 && numbers[i] % 5 == 0) { count++; } } return count; }
You are given a list of N integers, write a C++ function to find the second smallest element.	```cpp int findSecondSmallestElement(vector<int> numbers) { int smallest = numbers[0]; int secondSmallest = INT_MAX; for (int i = 1; i < numbers.size(); i++) { if (numbers[i] < smallest) { secondSmallest = smallest; smallest = numbers[i]; } else if (numbers[i] < secondSmallest && numbers[i] != smallest) { secondSmallest = numbers[i]; } } return secondSmallest; }
Write a C++ function to calculate the sum of even numbers in an array of integers.	int sum_even_numbers(int arr[], int n) { int sum = 0; for(int i = 0; i < n; i++){ if(arr[i] % 2 == 0){ sum += arr[i]; } } return sum; }
Create a function that takes a string as input and returns the string without vowels.	#include <string> #include <iostream> using namespace std; string remove_vowels(string str) { string result = ""; for(int i = 0; i < str.length(); i++){ char c = tolower(str[i]); if(c != 'a' && c != 'e' && c != 'i' && c != 'o' && c != 'u'){ result += str[i]; } } return result; }
Write a C++ function that takes a list of integers as input and returns the count of numbers greater than the average.	#include <iostream> using namespace std; int count_greater_than_average(int arr[], int n) { int sum = 0; for(int i = 0; i < n; i++){ sum += arr[i]; } int average = sum / n; int count = 0; for(int i = 0; i < n; i++){ if(arr[i] > average){ count++; } } return count; }
Create a function that takes a list of strings as input, and returns the longest string in the list.	#include <string> #include <iostream> using namespace std; string find_longest_string(string str[], int n) { string longest_string = str[0]; for(int i = 1; i < n; i++){ if(str[i].length() > longest_string.length()){ longest_string = str[i]; } } return longest_string; }
Write a C++ function to count the number of occurrences of a specific character in a given string.	#include <string> #include <iostream> using namespace std; int count_char_occurrences(string str, char c) { int count = 0; for(int i = 0; i < str.length(); i++){ if(str[i] == c){ count++; } } return count; }
write a C++ function that calculates the average of all the numbers in a given array of integers.	```cpp #include <iostream> double CalculateAverage(int arr[], int size) { double sum = 0; for (int i = 0; i < size; i++) { sum += arr[i]; } return sum / size; } int main() { int arr[] = {1, 2, 3, 4, 5}; int size = sizeof(arr) / sizeof(arr[0]); std::cout << "Average: " << CalculateAverage(arr, size) << std::endl; return 0; }
Write a C++ function that takes a string as input and returns the string in lowercase.	```cpp #include <iostream> #include <string> #include <cctype> std::string ToLowercase(std::string str) { for (char& c : str) { c = std::tolower(c); } return str; } int main() { std::string str = "HELLO, WORLD!"; std::cout << "Lowercase: " << ToLowercase(str) << std::endl; return 0; }
You need to write a C++ function that takes an array of integers as input and returns the maximum element in the array.	```cpp #include <iostream> int FindMax(int arr[], int size) { int max = arr[0]; for (int i = 1; i < size; i++) { if (arr[i] > max) { max = arr[i]; } } return max; } int main() { int arr[] = {5, 2, 7, 1, 9}; int size = sizeof(arr) / sizeof(arr[0]); std::cout << "Maximum: " << FindMax(arr, size) << std::endl; return 0; }
Write a C++ function that takes a string as input and returns the string with all vowels removed.	```cpp #include <iostream> #include <string> std::string RemoveVowels(std::string str) { std::string result = ""; for (char c : str) { if (c != 'a' && c != 'e' && c != 'i' && c != 'o' && c != 'u' && c != 'A' && c != 'E' && c != 'I' && c != 'O' && c != 'U') { result += c; } } return result; } int main() { std::string str = "Hello, World!"; std::cout << "Without vowels: " << RemoveVowels(str) << st…
You need to write a C++ function that takes two integers as input and returns their greatest common divisor (GCD).	```cpp #include <iostream> int CalculateGCD(int a, int b) { if (b == 0) { return a; } else { return CalculateGCD(b, a % b); } } int main() { int a = 12; int b = 15; std::cout << "GCD: " << CalculateGCD(a, b) << std::endl; return 0; }
Write a C++ function to calculate the total number of vowels in a given string.	#include <iostream> #include <string> using namespace std; int countVowels(string s) { int count = 0; for (int i = 0; i < s.length(); i++) { char c = toupper(s[i]); if (c == 'A' || c == 'E' || c == 'I' || c == 'O' || c == 'U') { count++; } } return count; }
Implement a function to find the product of all elements in a given vector of integers.	#include <iostream> #include <vector> using namespace std; int productOfVector(vector<int> vec) { int product = 1; for (int i = 0; i < vec.size(); i++) { product *= vec[i]; } return product; }
Write a C++ function to calculate the number of occurrences of a given character in a string.	#include <iostream> #include <string> using namespace std; int charOccurrences(string s, char c) { int occurrences = 0; for (int i = 0; i < s.length(); i++) { if (s[i] == c) { occurrences++; } } return occurrences; }
Write a C++ function to find the maximum element in a given vector of integers.	#include <iostream> #include <vector> #include <algorithm> using namespace std; int maxElement(vector<int> vec) { return *max_element(vec.begin(), vec.end()); }
Implement a function to calculate the number of days in a given month of a given year.	#include <iostream> using namespace std; int daysInMonth(int year, int month) { if (month == 2) { if ((year % 4 == 0 && year % 100 != 0) || year % 400 == 0) { return 29; } else { return 28; } } else if (month == 4 || month == 6 || month == 9 || month == 11) { return 30; } else { return 31; } }
Create a function count_vowels that takes a string as input and returns the number of vowels in the string.	```cpp #include <iostream> #include <string> using namespace std; int count_vowels(string s) { int count = 0; for (char c : s) { c = tolower(c); if (c == 'a' || c == 'e' || c == 'i' || c == 'o' || c == 'u') { count++; } } return count; }
Write a function factorial that takes an integer as input and returns the factorial of the number.	```cpp #include <iostream> using namespace std; long long factorial(int n) { long long result = 1; for (int i = 1; i <= n; i++) { result *= i; } return result; }
Create a function max_min that takes a list of integers as input and returns the maximum and minimum values in the list.	```cpp #include <iostream> #include <vector> #include <algorithm> using namespace std; pair<int, int> max_min(vector<int> numbers) { int max_val = *max_element(numbers.begin(), numbers.end()); int min_val = *min_element(numbers.begin(), numbers.end()); return make_pair(max_val, min_val); }
Write a function is_palindrome that takes a string as input and returns true if the string is a palindrome, false otherwise.	```cpp #include <iostream> #include <string> using namespace std; bool is_palindrome(string s) { string reversed = s; reverse(reversed.begin(), reversed.end()); return s == reversed; }
Create a function sum_digits that takes an integer as input and returns the sum of its digits.	```cpp #include <iostream> using namespace std; int sum_digits(int n) { int sum = 0; while (n > 0) { sum += n % 10; n /= 10; } return sum; }
Write a program that calculates the area and perimeter of a rectangle given its length and width.	#include <iostream> using namespace std; void calculateRectangleProperties(float length, float width) { float area = length * width; float perimeter = 2 * (length + width); cout << "The area of the rectangle is " << area << " and the perimeter is " << perimeter << "." << endl; } return;
Create a function to find the greatest common divisor of two integers.	#include <iostream> using namespace std; int findGCD(int num1, int num2) { int gcd = num1; int temp = num2; while (temp != 0) { gcd = temp; temp = num1 % temp; num1 = gcd; } return gcd; }
Write a function that takes a string as input and returns the string in upper case.	#include <iostream> #include <string> using namespace std; string toUpperCase(string str) { for (int i = 0; i < str.length(); i++) { str[i] = toupper(str[i]); } return str; }
Create a function to find the maximum and minimum values in an array of integers.	#include <iostream> using namespace std; void findMinMax(int arr[], int size) { int maxVal = arr[0]; int minVal = arr[0]; for (int i = 1; i < size; i++) { if (arr[i] > maxVal) { maxVal = arr[i]; } if (arr[i] < minVal) { minVal = arr[i]; } } cout << "The maximum value in the array is " << maxVal << " and the minimum value is " << minVal << "." << endl; } return;
Write a function that takes an integer as input and returns true if the number is prime, and false otherwise.	#include <iostream> using namespace std; bool isPrime(int num) { if (num <= 1) { return false; } for (int i = 2; i * i <= num; i++) { if (num % i == 0) { return false; } } return true; }
Write a function to count the number of elements in a given list that are less than a certain value.	```cpp int countLessThan(vector<int> list, int value) { int count = 0; for (int i = 0; i < list.size(); i++) { if (list[i] < value) { count++; } } return count; }
Create a function that takes a list of integers and returns the list with all even numbers removed.	```cpp vector<int> removeEvenNumbers(vector<int> list) { vector<int> newList; for (int i = 0; i < list.size(); i++) { if (list[i] % 2 != 0) { newList.push_back(list[i]); } } return newList; }
Write a function that takes two lists of integers as input and returns the list that contains the higher maximum value.	```cpp vector<int> higherMaxList(vector<int> list1, vector<int> list2) { int max1 = *max_element(list1.begin(), list1.end()); int max2 = *max_element(list2.begin(), list2.end()); if (max1 > max2) { return list1; } else { return list2; } }
Develop a function that takes a list of integers and returns True if the list contains an odd number of odd numbers, False otherwise.	```cpp bool oddCountOdd(vector<int> list) { int count = 0; for (int i = 0; i < list.size(); i++) { if (list[i] % 2 != 0) { count++; } } if (count % 2 != 0) { return true; } else { return false; } }
Write a function that takes a list of integers and returns the list with all numbers at even indices removed.	```cpp vector<int> removeEvenIndices(vector<int> list) { vector<int> newList; for (int i = 0; i < list.size(); i++) { if (i % 2 != 0) { newList.push_back(list[i]); } } return newList; }
Write a function `average_of_three_numbers` that takes three integers as input and returns their average.	```cpp #include<iostream> using namespace std; double average_of_three_numbers(int a, int b, int c) { return (a + b + c) / 3.0; } // Function details: // Name: average_of_three_numbers // Inputs: a (int), b (int), c (int) // Output: average (double) // Data type of inputs: int, int, int // Data type of output: double
Write a function `is_prime_number` that takes an integer as input and returns true if the number is a prime number, false otherwise.	```cpp #include<iostream> using namespace std; bool is_prime_number(int n) { if (n <= 1) { return false; } for (int i = 2; i * i <= n; i++) { if (n % i == 0) { return false; } } return true; } // Function details: // Name: is_prime_number // Inputs: n (int) // Output: result (bool) // Data type of inputs: int // Data type of output: bool
Write a function `sum_of_digits` that takes an integer as input and returns the sum of its digits.	```cpp #include<iostream> using namespace std; int sum_of_digits(int n) { int sum = 0; while (n != 0) { sum += n % 10; n /= 10; } return sum; } // Function details: // Name: sum_of_digits // Inputs: n (int) // Output: sum (int) // Data type of inputs: int // Data type of output: int
Write a function `count_vowels` that takes a string as input and returns the number of vowels in the string.	```cpp #include<iostream> using namespace std; int count_vowels(string s) { int count = 0; for (char c : s) { if (c == 'a' || c == 'e' || c == 'i' || c == 'o' || c == 'u' || c == 'A' || c == 'E' || c == 'I' || c == 'O' || c == 'U') { count++; } } return count; } // Function details: // Name: count_vowels // Inputs: s (string) // Output: count (int) // Data type of inputs: string // Data type of o…
Write a function `reverse_string` that takes a string as input and returns the reversed string.	```cpp #include<iostream> #include<string> using namespace std; string reverse_string(string s) { string reversed = ""; for (int i = s.length() - 1; i >= 0; i--) { reversed += s[i]; } return reversed; } // Function details: // Name: reverse_string // Inputs: s (string) // Output: reversed (string) // Data type of inputs: string // Data type of output: string
Write a function that takes a 3D vector of integers and returns the average of all integers in the 3D vector.	```cpp #include <vector> #include <numeric> double Average3Dvector(const std::vector<std::vector<std::vector<int>>>& v) { int count = 0; int sum = 0; for (const auto& twoD : v) { for (const auto& oneD : twoD) { count += oneD.size(); sum += std::accumulate(oneD.begin(), oneD.end(), 0); } } return static_cast<double>(sum) / count; }
Develop a function that takes an integer as input and returns the factorial of the integer.	```cpp #include <iostream> long long Factorial(int n) { long long result = 1; for (int i = 1; i <= n; i++) { result *= i; } return result; }
Design a function that takes a list of integers and returns the frequency of each unique element in the list.	```cpp #include <vector> #include <map> std::map<int, int> Frequency(const std::vector<int>& v) { std::map<int, int> freqMap; for (const auto& num : v) { auto it = freqMap.find(num); if (it != freqMap.end()) { it->second++; } else { freqMap[num] = 1; } } return freqMap; }
Write a function that takes a list of strings and returns the list with all strings converted to uppercase.	```cpp #include <vector> #include <algorithm> #include <string> std::vector<std::string> ToUpperCase(const std::vector<std::string>& v) { std::vector<std::string> upperCaseV = v; for (auto& str : upperCaseV) { std::transform(str.begin(), str.end(), str.begin(), [](unsigned char c) { return std::toupper(c); }); } return upperCaseV; }
Develop a function that takes a list of integers as input and returns the list sorted in descending order.	```cpp #include <vector> #include <algorithm> std::vector<int> SortDescending(const std::vector<int>& v) { std::vector<int> sortedV = v; std::sort(sortedV.begin(), sortedV.end(), std::greater<>()); return sortedV; }
Write a function that takes a string as input and returns the string with all the characters reversed.	```cpp #include<iostream> using namespace std; void generateFibonacci(int n) { int t1 = 0, t2 = 1, nextTerm = 0; cout << "Fibonacci Series: "; for (int i = 1; i <= n; ++i) { cout << t1 << ", "; nextTerm = t1 + t2; t1 = t2; t2 = nextTerm; } cout << endl; } int main() { int num; cout << "Enter the number of terms: "; cin >> num; generateFibonacci(num); return 0; }
Write a function that takes two integers as input and returns the greatest common divisor of the two numbers.	```cpp #include<bits/stdc++.h> using namespace std; string reverseString(string str) { int start = 0, end = str.length() - 1; while (start < end) { swap(str[start], str[end]); start++; end--; } return str; } int main() { string str; cout << "Enter a string: "; cin >> str; cout << "Reversed string: " << reverseString(str) << endl; return 0; }
Write a function that takes a list of integers as input and returns the number of even numbers in the list.	```cpp #include<iostream> using namespace std; int gcd(int a, int b) { if (b == 0) return a; else return gcd(b, a % b); } int main() { int num1, num2; cout << "Enter first number: "; cin >> num1; cout << "Enter second number: "; cin >> num2; cout << "GCD of " << num1 << " and " << num2 << " is " << gcd(num1, num2) << endl; return 0; }
Write a function that takes a string as input and returns the string with all occurrences of a specific character removed.	```cpp #include<bits/stdc++.h> using namespace std; int countEvenNumbers(vector<int> nums) { int count = 0; for (int num : nums) { if (num % 2 == 0) count++; } return count; } int main() { vector<int> nums; int n; cout << "Enter the size of the list: "; cin >> n; cout << "Enter the list of numbers: "; for (int i = 0; i < n; ++i) { int num; cin >> num; nums.push_back(num); } cout << "Number of eve…
Write a function that finds the maximum value in a given two-dimensional array and returns its row and column indices. The function should take as input a 2D array of integers and return two integers, which are the row and column indices of the maximum value.	```cpp #include <iostream> #include <vector> using namespace std; pair<int, int> findMaxIndices(vector<vector<int>>& arr) { int maxVal = arr[0][0]; int maxRow = 0; int maxCol = 0; for (int i = 0; i < arr.size(); i++) { for (int j = 0; j < arr[i].size(); j++) { if (arr[i][j] > maxVal) { maxVal = arr[i][j]; maxRow = i; maxCol = j; } } } return make_pair(maxRow, maxCol); } int main() { vector<vector…
Create a function to calculate the average of all elements in a given array of integers.	```cpp #include <iostream> #include <vector> using namespace std; double calculateAverage(vector<int>& arr) { double sum = 0.0; for (int i = 0; i < arr.size(); i++) { sum += arr[i]; } return sum / arr.size(); } int main() { vector<int> arr = {1, 2, 3, 4, 5}; double average = calculateAverage(arr); cout << "Average: " << average << endl; return 0; }
Write a function to reverse a given string in-place without using any extra space.	```cpp #include <iostream> #include <string> using namespace std; void reverseStringInPlace(string& str) { int start = 0; int end = str.length() - 1; while (start < end) { char temp = str[start]; str[start] = str[end]; str[end] = temp; start++; end--; } } int main() { string str = "hello"; reverseStringInPlace(str); cout << "Reversed string: " << str << endl; return 0; }
Create a function that finds the first duplicate element in a given array of integers and returns its index.	```cpp #include <iostream> #include <unordered_map> #include <vector> using namespace std; int findFirstDuplicate(vector<int>& arr) { unordered_map<int, int> map; for (int i = 0; i < arr.size(); i++) { if (map.count(arr[i])) { return i; } map[arr[i]] = i; } return -1; // No duplicate found } int main() { vector<int> arr = {1, 2, 3, 2, 4, 5}; int index = findFirstDuplicate(arr); cout << "First dup…
Write a function that takes a string as input and returns the string with all digits removed.	```cpp #include <iostream> #include <string> using namespace std; string removeDigits(string str) { string result = ""; for (char c : str) { if (!isdigit(c)) { result += c; } } return result; } int main() { string str = "hello123world"; string result = removeDigits(str); cout << "String without digits: " << result << endl; return 0; }
Implement a C++ function that takes a list of strings as input and returns True if all the strings in the list have the same length, False otherwise.	```cpp #include <vector> #include <string> bool allSameLength(const std::vector<std::string>& strings) { if (strings.empty()) { return true; } int length = strings[0].length(); for (const auto& str : strings) { if (str.length() != length) { return false; } } return true; }
Write a function that takes a list of integers as input and returns the position of the element with the largest value in the list. If there are multiple elements with the same largest value, return the position of the first occurrence.	```cpp #include <vector> int getPositionOfMax(const std::vector<int>& numbers) { if (numbers.empty()) { throw std::invalid_argument("Input list is empty"); } int maxPos = 0; for (int i = 1; i < numbers.size(); i++) { if (numbers[i] > numbers[maxPos]) { maxPos = i; } } return maxPos; }
Create a program that takes a list of integers as input and returns True if the list contains at least one element that is a perfect square, and False otherwise.	```cpp #include <vector> #include <cmath> bool hasPerfectSquare(const std::vector<int>& numbers) { for (int num : numbers) { double sqrtNum = std::sqrt(num); if (sqrtNum == static_cast<int>(sqrtNum)) { return true; } } return false; }
Implement a C++ function that takes a list of strings as input and returns the string with the highest alphabetical order. If there are multiple strings with the same highest alphabetical order, return the first one.	```cpp #include <vector> #include <string> std::string highestAlphabeticalOrder(const std::vector<std::string>& strings) { if (strings.empty()) { throw std::invalid_argument("Input list is empty"); } std::string maxStr = strings[0]; for (const auto& str : strings) { if (str > maxStr) { maxStr = str; } } return maxStr; }
Write a function that takes a list of integers as input and returns the count of elements that are greater than their next element in the list. If the list has less than two elements, return 0.	```cpp #include <vector> int countGreaterNext(const std::vector<int>& numbers) { if (numbers.size() < 2) { return 0; } int count = 0; for (int i = 0; i < numbers.size() - 1; i++) { if (numbers[i] > numbers[i + 1]) { count++; } } return count; }
Write a function that accepts two integers as input and returns their greatest common divisor (GCD).	#include <iostream> using namespace std; int find_gcd(int a, int b) { if (b == 0) return a; else return find_gcd(b, a % b); } int main() { int a, b; cout << "Enter two integers: "; cin >> a >> b; cout << "Greatest Common Divisor: " << find_gcd(a, b) << endl; return 0; }
Write a function that takes a string as input and returns the count of vowels in the string.	#include <iostream> #include <string> using namespace std; int count_vowels(string str) { int count = 0; for (int i = 0; i < str.length(); i++) { char c = tolower(str[i]); if (c == 'a' || c == 'e' || c == 'i' || c == 'o' || c == 'u') count++; } return count; } int main() { string str; cout << "Enter a string: "; cin >> str; cout << "Vowels count: " << count_vowels(str) << endl; return 0; }
Implement a function that takes an integer array as input and returns the sum of all the numbers at even indices.	#include <iostream> using namespace std; int sum_even_indices(int arr[], int n) { int sum = 0; for (int i = 0; i < n; i += 2) { sum += arr[i]; } return sum; } int main() { int n; cout << "Enter the size of the array: "; cin >> n; int arr[n]; cout << "Enter array elements: "; for (int i = 0; i < n; i++) cin >> arr[i]; cout << "Sum of elements at even indices: " << sum_even_indices(arr, n) << endl;…
Write a function to find the maximum element in an array.	#include <iostream> using namespace std; int find_max(int arr[], int n) { int max = arr[0]; for (int i = 1; i < n; i++) { if (arr[i] > max) max = arr[i]; } return max; } int main() { int n; cout << "Enter the size of the array: "; cin >> n; int arr[n]; cout << "Enter array elements: "; for (int i = 0; i < n; i++) cin >> arr[i]; cout << "Maximum element: " << find_max(arr, n) << endl; return 0; }
Write a function that takes a sentence as input and returns the number of words in the sentence.	#include <iostream> #include <string> #include <sstream> using namespace std; int count_words(string sentence) { stringstream ss(sentence); string word; int count = 0; while (ss >> word) { count++; } return count; } int main() { string sentence; cout << "Enter a sentence: "; getline(cin, sentence); cout << "Number of words: " << count_words(sentence) << endl; return 0; }
Write a function calculate_sum_of_squares that takes a vector of integers as input and returns the sum of the squares of all the integers in the vector.	```cpp #include <vector> int calculate_sum_of_squares(std::vector<int> vec) { int sum_of_squares = 0; for (int num : vec) { sum_of_squares += num * num; } return sum_of_squares; }
Write a function to find the longest common prefix between two strings.	```cpp #include <string> std::string longest_common_prefix(std::string str1, std::string str2) { std::string prefix; for (int i = 0; i < str1.length() && i < str2.length(); i++) { if (str1[i] == str2[i]) { prefix += str1[i]; } else { break; } } return prefix; }
Define a function count_tokenize_words that takes a string as input and returns the number of words in the string.	```cpp #include <string> #include <sstream> int count_tokenize_words(std::string str) { std::stringstream ss(str); std::string word; int count = 0; while (ss >> word) { count++; } return count; }
Write a function to find the minimum absolute difference between any two elements in a vector of integers.	```cpp #include <vector> #include <algorithm> int min_absolute_difference(std::vector<int> vec) { std::sort(vec.begin(), vec.end()); int min_diff = INT_MAX; for (int i = 1; i < vec.size(); i++) { min_diff = std::min(min_diff, vec[i] - vec[i-1]); } return min_diff; }
Write a function find_max_value_key that takes a map of integers to strings as input and returns the key with the maximum value.	```cpp #include <map> int find_max_value_key(std::map<int, std::string> m) { int max_key = 0; for (auto it = m.begin(); it != m.end(); it++) { if (it->first > max_key) { max_key = it->first; } } return max_key; }
Write a C++ function that takes an array of integers as an input and returns true if the array contains at least one duplicate and false otherwise.	```cpp bool hasDuplicates(int arr[], int size) { bool present[10000] = {false}; for (int i = 0; i < size; i++) { if (present[arr[i]]) { return true; } present[arr[i]] = true; } return false; }
Write a C++ function that takes two integers as an input and returns the sum of the squares of the two integers.	```cpp int sumOfSquares(int a, int b) { return a * a + b * b; }
Write a C++ function that takes a string as an input and returns the string in uppercase.	```cpp #include <algorithm> string toUpperCase(string str) { transform(str.begin(), str.end(), str.begin(), ::toupper); return str; }
Write a C++ function that takes an array of integers as an input and returns the maximum value in the array.	```cpp int findMax(int arr[], int size) { int max = arr[0]; for (int i = 1; i < size; i++) { if (arr[i] > max) { max = arr[i]; } } return max; }
Write a C++ function that takes two strings as an input and returns true if the strings are anagrams of each other and false otherwise.	```cpp #include <algorithm> bool areAnagrams(string str1, string str2) { if (str1.length() != str2.length()) { return false; } sort(str1.begin(), str1.end()); sort(str2.begin(), str2.end()); return str1 == str2; }
Create a function `calculate_average` that takes a list of grades as input and returns the average grade.	```cpp #include <vector> #include <numeric> double calculate_average(const std::vector<int>& grades) { if (grades.empty()) { throw std::runtime_error("List of grades is empty"); } double sum = std::accumulate(grades.begin(), grades.end(), 0.0); return sum / grades.size(); }
Write a function `count_vowels` that takes a string as input and returns the count of vowels in the string.	```cpp #include <string> #include <cctype> int count_vowels(const std::string& str) { int count = 0; for (char c : str) { c = std::tolower(c); if (c == 'a' || c == 'e' || c == 'i' || c == 'o' || c == 'u') { count++; } } return count; }
Write a function `is_palindrome` that takes a string as input and returns true if the string is a palindrome, false otherwise.	```cpp #include <string> bool is_palindrome(const std::string& str) { std::string reversed_str = str; std::reverse(reversed_str.begin(), reversed_str.end()); return str == reversed_str; }
Create a function `find_largest_number` that takes a list of numbers as input and returns the largest number in the list.	```cpp #include <vector> #include <algorithm> int find_largest_number(const std::vector<int>& numbers) { if (numbers.empty()) { throw std::runtime_error("List of numbers is empty"); } return *std::max_element(numbers.begin(), numbers.end()); }
Write a function `format_phone_number` that takes a string representing a phone number as input and returns a formatted string in the format "(XXX) XXX-XXXX".	```cpp #include <string> std::string format_phone_number(const std::string& phone_number) { if (phone_number.size() != 10) { throw std::runtime_error("Invalid phone number"); } std::string formatted_number = "("; formatted_number += phone_number.substr(0, 3) + ") "; formatted_number += phone_number.substr(3, 3) + "-"; formatted_number += phone_number.substr(6, 4); return formatted_number; }
Write a function that takes a list of integers and returns the largest prime number in the list. If there are no prime numbers in the list, the function should return -1.	```cpp #include <vector> bool isPrime(int n) { if (n <= 1) return false; for (int i = 2; i * i <= n; i++) { if (n % i == 0) return false; } return true; } int largestPrime(std::vector<int>& nums) { int largestPrime = -1; for (int num : nums) { if (isPrime(num) && num > largestPrime) { largestPrime = num; } } return largestPrime; }
Write a function that takes a string as input and returns the string with all vowels removed.	```cpp #include <string> std::string removeVowels(std::string s) { std::string result = ""; for (char c : s) { if (c != 'a' && c != 'e' && c != 'i' && c != 'o' && c != 'u' && c != 'A' && c != 'E' && c != 'I' && c != 'O' && c != 'U') { result += c; } } return result; }
Write a function that takes a list of strings as input and returns the length of the longest string in the list.	```cpp #include <vector> #include <string> int longestStringLength(std::vector<std::string>& strings) { int maxLength = 0; for (std::string s : strings) { if (s.length() > maxLength) { maxLength = s.length(); } } return maxLength; }
Write a function that takes an integer as input and returns the number of digits in the integer.	```cpp int countDigits(int n) { int count = 0; while (n != 0) { n /= 10; count++; } return count; }
Write a function that takes a list of characters as input and returns True if the list is a palindrome, False otherwise.	```cpp #include <vector> bool isPalindrome(std::vector<char>& chars) { int left = 0; int right = chars.size() - 1; while (left < right) { if (chars[left] != chars[right]) { return false; } left++; right--; } return true; }
Write a C++ function that takes a string as input and returns the string in uppercase.	#include <string> #include <cctype> std::string ToUpperCase(std::string str) { std::string result = ""; for (int i = 0; i < str.size(); i++) { result += std::toupper(str[i]); } return result; }
Implement a C++ function that accepts a list of integers as input and returns the count of all even numbers in the list.	#include <vector> int CountEvenNumbers(std::vector<int> numbers) { int count = 0; for (int num : numbers) { if (num % 2 == 0) { count++; } } return count; }
Write a C++ function that takes a vector of strings as input and returns the string with the maximum length.	#include <vector> #include <string> std::string FindLongestString(std::vector<std::string> strings) { std::string longestString = ""; for (std::string str : strings) { if (str.size() > longestString.size()) { longestString = str; } } return longestString; }
Implement a C++ function that accepts a list of integers as input and returns the product of all elements in the list.	#include <vector> int CalculateProduct(std::vector<int> numbers) { int product = 1; for (int num : numbers) { product *= num; } return product; }
Write a C++ function that takes a vector of characters as input and returns the count of all vowels in the vector.	#include <vector> int CountVowels(std::vector<char> chars) { int count = 0; for (char c : chars) { switch (c) { case 'a': case 'e': case 'i': case 'o': case 'u': case 'A': case 'E': case 'I': case 'O': case 'U': count++; break; default: break; } } return count; }
Write a function that takes a list of integers as input and returns the sum of all the even numbers in the list.	```c++ int sum_even_numbers(vector<int> numbers) { int sum = 0; for (int num : numbers) { if (num % 2 == 0) { sum += num; } } return sum; }
Create a function that takes a string as input and returns the string with all vowels removed.	```c++ string remove_vowels(string s) { string result = ""; for (char c : s) { if (c != 'a' && c != 'e' && c != 'i' && c != 'o' && c != 'u' && c != 'A' && c != 'E' && c != 'I' && c != 'O' && c != 'U') { result += c; } } return result; }
Write a function that takes a list of integers as input and returns the count of numbers that are greater than the average of the list.	```c++ int count_greater_than_avg(vector<int> numbers) { int sum = 0; for (int num : numbers) { sum += num; } double avg = (double)sum / numbers.size(); int count = 0; for (int num : numbers) { if (num > avg) { count++; } } return count; }
Create a function that takes a list of strings as input and returns the concatenation of all strings in the list.	```c++ string concatenate_strings(vector<string> strings) { string result = ""; for (string s : strings) { result += s; } return result; }
Write a function that takes a list of integers as input and returns the maximum difference between any two elements in the list.	```c++ int max_difference(vector<int> numbers) { int min_num = *min_element(numbers.begin(), numbers.end()); int max_num = *max_element(numbers.begin(), numbers.end()); return max_num - min_num; } ```
Write a C++ function to calculate the average of a list of integers.	```cpp #include <vector> #include <numeric> double calculateAverage(const std::vector<int>& numbers) { if (numbers.empty()) { return 0.0; } double sum = std::accumulate(numbers.begin(), numbers.end(), 0); return sum / numbers.size(); } // Name: calculateAverage // Inputs: const std::vector<int>& numbers // Outputs: double // Data types: input - vector of integers, output - double
Implement a C++ function to find the longest common prefix among a list of strings.	```cpp #include <vector> #include <string> std::string findLongestCommonPrefix(const std::vector<std::string>& strings) { if (strings.empty()) { return ""; } std::string prefix = strings[0]; for (const std::string& str : strings) { while (str.find(prefix) != 0) { prefix.pop_back(); if (prefix.empty()) { return ""; } } } return prefix; } // Name: findLongestCommonPrefix // Inputs: const std::vecto…
Write a C++ function to count the frequency of each unique element in a given list of integers.	```cpp #include <vector> #include <unordered_map> std::unordered_map<int, int> countFrequencies(const std::vector<int>& numbers) { std::unordered_map<int, int> frequencyMap; for (int num : numbers) { auto it = frequencyMap.find(num); if (it != frequencyMap.end()) { it->second++; } else { frequencyMap[num] = 1; } } return frequencyMap; } // Name: countFrequencies // Inputs: const std::vector<int>&…
Implement a C++ function to check if a given string is a pangram, i.e., it contains all the alphabet letters at least once.	```cpp #include <string> #include <unordered_set> bool isPangram(const std::string& str) { std::unordered_set<char> alphabet('a', 'z' + 1); for (char c : str) { c = tolower(c); if (alphabet.find(c) != alphabet.end()) { alphabet.erase(c); } } return alphabet.empty(); } // Name: isPangram // Inputs: const std::string& str // Outputs: bool // Data types: input - string, output - boolean
Write a C++ function to find the second largest number in a list of integers.	```cpp #include <vector> #include <algorithm> int findSecondLargest(const std::vector<int>& numbers) { if (numbers.size() < 2) { return -1; } std::vector<int> sortedNumbers = numbers; std::sort(sortedNumbers.begin(), sortedNumbers.end()); int largest = sortedNumbers.back(); for (auto it = sortedNumbers.rbegin(); it != sortedNumbers.rend(); ++it) { if (*it != largest) { return *it; } } return -1; …
Write a function named count_vowels to count the number of vowels in a given string. The function should take a string as input and return the count of vowels.	#include <iostream> #include <string> #include <cctype> // for tolower() using namespace std; int count_vowels(string s) { int count = 0; for (int i = 0; i < s.length(); i++) { char c = tolower(s[i]); // Convert to lowercase if (c == 'a' || c == 'e' || c == 'i' || c == 'o' || c == 'u') { count++; } } return count; }
Write a function named find_largest to find the largest number in a list of numbers. The function should take a list of numbers as input and return the largest number.	#include <iostream> #include <vector> #include <algorithm> using namespace std; int find_largest(vector<int> numbers) { return *max_element(numbers.begin(), numbers.end()); }
Implement a function named reverse_string to reverse a given string. The function should take a string as input and return the reversed string.	#include <iostream> #include <string> using namespace std; string reverse_string(string s) { string reversed = ""; for (int i = s.length() - 1; i >= 0; i--) { reversed += s[i]; } return reversed; }
Write a function named calculate_area to calculate the area of a rectangle given its length and width. The function should take two numbers as input and return the area.	#include <iostream> using namespace std; double calculate_area(double length, double width) { return length * width; }
Implement a function named is_palindrome to determine if a given string is a palindrome. The function should take a string as input and return True if the string is a palindrome, False otherwise.	#include <iostream> #include <string> using namespace std; bool is_palindrome(string s) { string reversed = ""; for (int i = s.length() - 1; i >= 0; i--) { reversed += s[i]; } return s == reversed; }
Write a C++ function that takes a list of integers as input and returns the count of even numbers in the list.	```cpp #include <vector> int countEvenNumbers(const std::vector<int>& numbers) { int count = 0; for (int num : numbers) { if (num % 2 == 0) { count++; } } return count; }
Write a C++ function that takes a string as input and returns true if the string is a palindrome, false otherwise.	```cpp #include <string> bool isPalindrome(const std::string& str) { int start = 0; int end = str.length() - 1; while (start < end) { if (str[start] != str[end]) { return false; } start++; end--; } return true; }
Implement a C++ class called `Rectangle` with attributes `width` and `height`, and methods `area` and `perimeter`.	```cpp #include <iostream> class Rectangle { private: int width; int height; public: Rectangle(int w, int h) : width(w), height(h) {} double area() { return width * height; } double perimeter() { return 2 * (width + height); } };
Write a C++ function that takes a list of integers as input and returns the smallest number in the list.	```cpp #include <vector> #include <algorithm> int findMin(const std::vector<int>& numbers) { return *std::min_element(numbers.begin(), numbers.end()); }
Write a C++ function that takes two strings as input and returns true if the first string contains the second string, false otherwise.	```cpp #include <string> bool containsSubstring(const std::string& str1, const std::string& str2) { return str1.find(str2) != std::string::npos; } ```
Write a function that takes a vector of strings as input and returns the count of strings that start with a vowel.	```cpp #include <iostream> #include <vector> #include <string> int countVowelStrings(const std::vector<std::string>& input) { int count = 0; for (const auto& str : input) { char firstChar = tolower(str[0]); // convert to lowercase if (firstChar == 'a' || firstChar == 'e' || firstChar == 'i' || firstChar == 'o' || firstChar == 'u') { count++; } } return count; }
Create a function that takes a vector of integers as input and returns the sum of the absolute differences between adjacent elements.	```cpp #include <iostream> #include <vector> int sumAdjacentDiffs(const std::vector<int>& input) { int sum = 0; for (size_t i = 1; i < input.size(); ++i) { sum += std::abs(input[i] - input[i - 1]); } return sum; }
Write a function that takes two vectors of integers as input and returns a new vector containing the intersection of the two input vectors.	```cpp #include <iostream> #include <vector> #include <set> std::vector<int> intersection(const std::vector<int>& vec1, const std::vector<int>& vec2) { std::set<int> set1(vec1.begin(), vec1.end()); std::set<int> set2(vec2.begin(), vec2.end()); std::vector<int> intersection; for (int num : set1) { if (set2.count(num)) { intersection.push_back(num); } } return intersection; }
Create a function that takes a vector of integers as input and returns the count of unique pairs of numbers that add up to 10.	```cpp #include <iostream> #include <vector> #include <unordered_map> int countUniquePairs(const std::vector<int>& input) { std::unordered_map<int, int> numCounts; for (int num : input) { numCounts[num]++; } int count = 0; for (const auto& pair : numCounts) { int complement = 10 - pair.first; if (numCounts.count(complement) && pair.first != complement) { count++; } } return count; }
Write a function that takes a vector of characters as input and returns the longest sequence of consecutive characters that are in alphabetical order.	```cpp #include <iostream> #include <vector> #include <string> std::string longestAlphabeticSeq(const std::vector<char>& input) { std::string longestSeq; std::string currentSeq; for (char c : input) { if (currentSeq.empty() || c == currentSeq.back() + 1) { currentSeq += c; } else { if (currentSeq.size() > longestSeq.size()) { longestSeq = currentSeq; } currentSeq = std::string(1, c); } } if (curr…
Write a function that takes a string as input and returns the number of vowels in the string.	#include <iostream> #include <string> using namespace std; int countVowels(string s) { int count = 0; for(int i = 0; i < s.length(); i++) { char c = tolower(s[i]); if(c == 'a' || c == 'e' || c == 'i' || c == 'o' || c == 'u') { count++; } } return count; }
Create a function that takes two lists of integers as input and returns the intersection of the two lists.	#include <iostream> #include <vector> using namespace std; vector<int> intersection(vector<int> list1, vector<int> list2) { vector<int> result; for(int i = 0; i < list1.size(); i++) { for(int j = 0; j < list2.size(); j++) { if(list1[i] == list2[j]) { result.push_back(list1[i]); break; } } } return result; }
Write a function that takes a list of integers as input and returns the index of the maximum element in the list.	#include <iostream> #include <vector> using namespace std; int maxIndex(vector<int> list) { int max = list[0]; int index = 0; for(int i = 1; i < list.size(); i++) { if(list[i] > max) { max = list[i]; index = i; } } return index; }
Write a function that takes a string as input and returns the string with all vowels removed.	#include <iostream> #include <string> using namespace std; string removeVowels(string s) { string result = ""; for(int i = 0; i < s.length(); i++) { char c = tolower(s[i]); if(c != 'a' && c != 'e' && c != 'i' && c != 'o' && c != 'u') { result += s[i]; } } return result; }
Create a function that takes a list of integers as input and returns the list with all duplicates removed.	#include <iostream> #include <vector> #include <set> using namespace std; vector<int> removeDuplicates(vector<int> list) { set<int> s(list.begin(), list.end()); vector<int> result(s.begin(), s.end()); return result; }
Implement a C++ function that takes a string as input and returns True if the string is a palindrome, False otherwise.	bool isPalindrome(string s) { int i = 0, j = s.length() - 1; while (i < j) { if (s[i] != s[j]) { return false; } i++; j--; } return true; }
Write a C++ function that takes a list of integers, an integer x, and returns True if the list contains at least one number that is greater than x, False otherwise.	bool hasGreater(vector<int> numbers, int x) { for (int i = 0; i < numbers.size(); i++) { if (numbers[i] > x) { return true; } } return false; }
Implement a C++ function that takes a list of integers, removes all duplicates from the list, and returns the list.	vector<int> removeDuplicates(vector<int> numbers) { set<int> s(numbers.begin(), numbers.end()); vector<int> result(s.begin(), s.end()); return result; }
Write a C++ function that takes a string as input, converts all lowercase letters to uppercase, and returns the string.	string toUpperCase(string s) { for (int i = 0; i < s.length(); i++) { if (s[i] >= 'a' && s[i] <= 'z') { s[i] = s[i] - 'a' + 'A'; } } return s; }
Implement a C++ function that takes a list of integers, finds the maximum difference between any two elements in the list, and returns the difference.	int maxDifference(vector<int> numbers) { int max = numbers[0], min = numbers[0]; for (int i = 1; i < numbers.size(); i++) { if (numbers[i] > max) { max = numbers[i]; } if (numbers[i] < min) { min = numbers[i]; } } return max - min; }
Write a C++ function, reverseArray, that takes an array of integers and its size as inputs, and returns the reversed array.	void reverseArray(int arr[], int size){ int start = 0; int end = size - 1; while (start < end) { int temp = arr[start]; arr[start] = arr[end]; arr[end] = temp; start++; end--; } }
Write a C++ function, countPrimes, that takes an integer n as input and returns the count of prime numbers less than or equal to n.	int countPrimes(int n) { if (n <= 1) return 0; bool primes[n + 1]; for (int i = 0; i <= n; i++) { primes[i] = true; } primes[0] = primes[1] = false; for (int p = 2; p * p <= n; p++) { if (primes[p]) { for (int i = p * p; i <= n; i += p) { primes[i] = false; } } } int count = 0; for (int i = 2; i <= n; i++) { if (primes[i]) count++; } return count; }
Write a C++ function, isPalindrome, that takes a string as input and returns true if the string is a palindrome, false otherwise.	bool isPalindrome(std::string str) { int start = 0; int end = str.length() - 1; while (start < end) { if (str[start] != str[end]) return false; start++; end--; } return true; }
Write a C++ function, calculateAverage, that takes an array of integers and its size as inputs, and returns the average of the array elements.	double calculateAverage(int arr[], int size) { double sum = 0.0; for (int i = 0; i < size; i++) { sum += arr[i]; } return sum / size; }
Write a C++ function, concatenateStrings, that takes two strings as inputs and returns their concatenation.	std::string concatenateStrings(std::string str1, std::string str2) { return str1 + str2; }
Create a function that takes a string as input and returns the string with all vowels removed. For example, if the input string is "hello world", the output will be "hll wrld".	#include <bits/stdc++.h> using namespace std; string removeVowels(string inputStr) { string result = ""; for (char c : inputStr) { if (!strchr("aeiouAEIOU", c)) { result += c; } } return result; }
Write a function that takes a list of integers as input and returns the maximum sum of a contiguous subarray within the list. For example, if the input list is [-2, 1, -3, 4, -1, 2, 1, -5, 4], the output will be 6.	#include <bits/stdc++.h> using namespace std; int maxSubarraySum(vector<int> nums) { int maxSoFar = 0, currMax = 0; for (int num : nums) { currMax = max(num, currMax + num); maxSoFar = max(maxSoFar, currMax); } return maxSoFar; }
Create a function that takes a list of strings as input and returns a new list with all strings sorted in alphabetical order. For example, if the input list is ["dog", "cat", "elephant", "ant"], the output will be ["ant", "cat", "dog", "elephant"].	#include <bits/stdc++.h> using namespace std; vector<string> sortStrings(vector<string> strList) { sort(strList.begin(), strList.end()); return strList; }
Write a function that takes an integer n as input and returns the nth Fibonacci number. For example, if the input is 9, the output will be 34.	#include <bits/stdc++.h> using namespace std; int fibonacci(int n) { if (n <= 1) { return n; } return fibonacci(n - 1) + fibonacci(n - 2); }
Create a function that takes a list of integers as input and returns a new list with all duplicates removed. For example, if the input list is [1, 2, 2, 3, 4, 4, 5, 6, 6], the output will be [1, 2, 3, 4, 5, 6].	#include <bits/stdc++.h> using namespace std; vector<int> removeDuplicates(vector<int> nums) { sort(nums.begin(), nums.end()); nums.erase(unique(nums.begin(), nums.end()), nums.end()); return nums; }
Write a function that accepts a string as input and returns the count of vowels in the string.	int countVowels(string str) { int count = 0; for(int i = 0; i < str.length(); i++) { char c = tolower(str[i]); if(c == 'a' || c == 'e' || c == 'i' || c == 'o' || c == 'u') { count++; } } return count; }
Create a function that takes two integer arrays as input and returns true if they are identical, false otherwise.	bool arraysAreIdentical(int arr1[], int arr2[], int n) { for(int i = 0; i < n; i++) { if(arr1[i] != arr2[i]) { return false; } } return true; }
Write a function that accepts a string as input, removes all spaces from the string, and returns the resulting string.	string removeSpaces(string str) { string result = ""; for(int i = 0; i < str.length(); i++) { if(str[i] != ' ') { result += str[i]; } } return result; }
Develop a function that takes a list of integers as input and returns the second largest number in the list.	int secondLargest(int arr[], int n) { int max = INT_MIN, secondMax = INT_MIN; for(int i = 0; i < n; i++) { if(arr[i] > max) { secondMax = max; max = arr[i]; } else if(arr[i] > secondMax && arr[i] != max) { secondMax = arr[i]; } } return secondMax; }
Write a function that accepts a string as input and returns the string with all characters reversed.	string reverseString(string str) { int start = 0, end = str.length() - 1; while(start < end) { char temp = str[start]; str[start] = str[end]; str[end] = temp; start++; end--; } return str; }
Write a function that takes a string and a character as input and returns the frequency of the character in the string.	#include <iostream> using namespace std; int charFrequency(string s, char c) { int count = 0; for (int i = 0; i < s.length(); i++) { if (s[i] == c) { count++; } } return count; }
Write a function that takes a list of integers as input and returns the count of prime numbers in the list.	#include <iostream> #include <vector> using namespace std; bool isPrime(int num) { if (num <= 1) { return false; } for (int i = 2; i * i <= num; i++) { if (num % i == 0) { return false; } } return true; } int countPrimes(vector<int> list) { int count = 0; for (int num : list) { if (isPrime(num)) { count++; } } return count; }
Create a class called Student that has attributes for the student's name and grade. The class should have methods to update the grade and a method to display the student's information.	#include <iostream> #include <string> using namespace std; class Student { private: string name; double grade; public: Student(string n, double g) { name = n; grade = g; } void updateGrade(double newGrade) { grade = newGrade; } void displayInfo() { cout << "Name: " << name << ", Grade: " << grade << endl; } };
Write a function that takes a list of integers as input and returns the count of numbers that are greater than the average of the list.	#include <iostream> #include <vector> using namespace std; int countAboveAverage(vector<int> list) { int sum = 0; for (int num : list) { sum += num; } double average = (double)sum / list.size(); int count = 0; for (int num : list) { if (num > average) { count++; } } return count; }
Write a function that takes a list of strings as input and returns the longest string in the list.	#include <iostream> #include <vector> #include <string> using namespace std; string longestString(vector<string> list) { string longest = ""; for (string str : list) { if (str.length() > longest.length()) { longest = str; } } return longest; }
Write a function that takes a string as input and returns the count of all uppercase letters in the string.	```cpp int countUppercase(string s) { int count = 0; for (int i = 0; i < s.length(); i++) { if (isupper(s[i])) { count++; } } return count; }
Create a function that takes an integer n as input and returns the sum of the cubes of all even numbers less than or equal to n.	```cpp int sumCubesEven(int n) { int sum = 0; for (int i = 0; i <= n; i++) { if (i % 2 == 0) { sum += i * i * i; } } return sum; }
Write a function that takes a list of integers as input and returns the maximum contiguous subsequence sum.	```cpp int maxSubsequenceSum(vector<int> arr) { int maxSum = arr[0]; int currentSum = arr[0]; for (int i = 1; i < arr.size(); i++) { currentSum = max(arr[i], currentSum + arr[i]); maxSum = max(maxSum, currentSum); } return maxSum; }
Create a function that takes a string as input and returns the string with all occurrences of the word "the" changed to "a".	```cpp string replaceThe(string s) { string result = ""; int i = 0; while (i < s.length()) { if (s.substr(i, 3) == "the") { result += "a"; i += 3; } else { result += s[i]; i++; } } return result; }
Write a function that takes two integers as input and returns their least common multiple (LCM).	```cpp int lcm(int a, int b) { int max = a > b ? a : b; while (true) { if (max % a == 0 && max % b == 0) { return max; } max++; } }
Calculate the sum of all elements in a 2D vector.	```cpp #include <vector> #include <numeric> bool sumOf2DVector(const std::vector<std::vector<int>>& arr) { int sum = 0; for (const auto& row : arr) { sum += std::accumulate(row.begin(), row.end(), 0); } return sum; }
Count the number of words in a given sentence.	```cpp #include <string> #include <sstream> int countWords(const std::string& sentence) { std::istringstream iss(sentence); int count = 0; std::string word; while (iss >> word) { count++; } return count; }
Check if a given matrix is a diagonal matrix.	```cpp #include <vector> bool isDiagonalMatrix(const std::vector<std::vector<int>>& matrix) { int n = matrix.size(); for (int i = 0; i < n; i++) { for (int j = 0; j < n; j++) { if (i != j && matrix[i][j] != 0) { return false; } } } return true; }
Find the maximum absolute difference between any two elements in a given array.	```cpp #include <vector> #include <algorithm> int maxAbsoluteDifference(const std::vector<int>& arr) { int minVal = *std::min_element(arr.begin(), arr.end()); int maxVal = *std::max_element(arr.begin(), arr.end()); return maxVal - minVal; }
Check if a given string is a palindrome.	```cpp #include <string> bool isPalindrome(const std::string& str) { int start = 0; int end = str.length() - 1; while (start < end) { if (str[start] != str[end]) { return false; } start++; end--; } return true; }
Given a string of digits, write a C++ function to calculate and return the sum of all digits in the string.	```cpp #include<String> using namespace std; int digitSum(string str) { int sum = 0; for(int i = 0; i < str.length(); i++) { if(isdigit(str[i])) { sum += str[i] - '0'; } } return sum; }
Create a C++ function that takes a vector of integers as input and returns the sum of the squares of all odd numbers in the vector.	```cpp #include<vector> using namespace std; int sumOfOddSquares(vector<int> nums) { int sum = 0; for(int i = 0; i < nums.size(); i++) { if(nums[i] % 2 != 0) { sum += nums[i] * nums[i]; } } return sum; }
Write a C++ function to reverse a given string.	```cpp #include<String> using namespace std; string reverseString(string str) { string reversed = ""; for(int i = str.length() - 1; i >= 0; i--) { reversed += str[i]; } return reversed; }
Create a C++ function that takes a vector of strings as input and returns the longest string in the vector.	```cpp #include<vector> #include<String> using namespace std; string longestString(vector<string> strings) { string longest = ""; for(int i = 0; i < strings.size(); i++) { if(strings[i].length() > longest.length()) { longest = strings[i]; } } return longest; }
Write a C++ function to calculate and return the factorial of a given integer.	```cpp using namespace std; int factorial(int num) { int result = 1; for(int i = 2; i <= num; i++) { result *= i; } return result; }
Write a function that takes a string as input and returns the number of words in the string.	int countWords(string s) { int count = 0; bool inWord = false; for (char c : s) { if (c != ' ' && !inWord) { count++; inWord = true; } if (c == ' ') { inWord = false; } } return count; }
Write a function that takes a list of integers as input and returns the list with all duplicates removed.	vector<int> removeDuplicates(vector<int> nums) { unordered_map<int, bool> exists; vector<int> result; for (int num : nums) { if (!exists[num]) { result.push_back(num); exists[num] = true; } } return result; }
Given a string, write a function that returns the frequency of the most frequent character.	int maxCharFrequency(string s) { unordered_map<char, int> freq; for (char c : s) { freq[c]++; } int maxFreq = 0; for (auto& pair : freq) { maxFreq = max(maxFreq, pair.second); } return maxFreq; }
Write a function that takes a list of integers as input and returns the number of pairs with a difference of 1.	int countPairsWithDiffOne(vector<int> nums) { unordered_map<int, int> freq; for (int num : nums) { freq[num]++; } int count = 0; for (auto& pair : freq) { if (freq.find(pair.first + 1) != freq.end()) { count += pair.second * freq[pair.first + 1]; } } return count; }
Write a function that takes a string as input and returns the string with all non-alphanumeric characters removed.	string removeNonAlphanumericChars(string s) { string result = ""; for (char c : s) { if (isalnum(c)) { result += c; } } return result; }
Write a function `count_vowels` that takes a string as input and returns the total number of vowels in the string.	```c++ int count_vowels(string str) { int count = 0; for (int i = 0; i < str.length(); i++) { char c = tolower(str[i]); if (c == 'a' || c == 'e' || c == 'i' || c == 'o' || c == 'u') { count++; } } return count; }
Write a function `find_max_element` that takes a 2D vector of integers as input and returns the maximum element in the vector.	```c++ int find_max_element(vector<vector<int>> vec) { int max_element = INT_MIN; for (int i = 0; i < vec.size(); i++) { for (int j = 0; j < vec[i].size(); j++) { if (vec[i][j] > max_element) { max_element = vec[i][j]; } } } return max_element; }
Write a function `remove_duplicates` that takes a list of integers as input and returns a new list with duplicates removed.	```c++ list<int> remove_duplicates(list<int> lst) { list<int> new_lst; for (int i = 0; i < lst.size(); i++) { bool duplicate = false; for (int j = 0; j < new_lst.size(); j++) { if (lst[i] == new_lst[j]) { duplicate = true; break; } } if (!duplicate) { new_lst.push_back(lst[i]); } } return new_lst; }
Write a function `calculate_average` that takes a list of integers as input and returns the average of the numbers in the list.	```c++ double calculate_average(list<int> lst) { double sum = 0.0; for (int i = 0; i < lst.size(); i++) { sum += lst[i]; } return sum / lst.size(); }
Write a function `find_longest_word` that takes a string as input and returns the longest word in the string.	```c++ string find_longest_word(string str) { string longest_word = ""; string word = ""; for (int i = 0; i < str.length(); i++) { if (str[i] != ' ') { word += str[i]; } else { if (word.length() > longest_word.length()) { longest_word = word; } word = ""; } } if (word.length() > longest_word.length()) { longest_word = word; } return longest_word; }
Write a function called calculate_average that takes a list of integers as input and returns the average of the numbers in the list.	double calculate_average(vector<int> numbers) { double sum = 0; for(int i = 0; i < numbers.size(); i++) { sum += numbers[i]; } return sum / numbers.size(); }
Write a function called count_vowels that takes a string as input and returns the count of vowels in the string.	int count_vowels(string str) { int count = 0; for(int i = 0; i < str.length(); i++) { char c = tolower(str[i]); if(c == 'a' || c == 'e' || c == 'i' || c == 'o' || c == 'u') { count++; } } return count; }
Write a function called is_prime that takes an integer as input and returns true if the number is prime, false otherwise.	bool is_prime(int num) { if(num < 2) { return false; } for(int i = 2; i <= sqrt(num); i++) { if(num % i == 0) { return false; } } return true; }
Write a function called find_largest that takes a list of integers as input and returns the largest number in the list.	int find_largest(vector<int> numbers) { int largest = numbers[0]; for(int i = 1; i < numbers.size(); i++) { if(numbers[i] > largest) { largest = numbers[i]; } } return largest; }
Write a function called get_length that takes a string as input and returns the length of the string.	int get_length(string str) { return str.length(); }
Define a function that takes a list of floating-point numbers as input and returns the median value of the list.	#include<bits/stdc++.h> using namespace std; double findmedian(vector<double>v){ sort(v.begin(),v.end()); int n=v.size(); if(n%2==0) return (v[n/2 - 1] + v[n/2]) / 2.0; else return v[n/2]; }
Write a function that takes a string as input and returns the string with vowels removed, ignoring case sensitivity.	#include<bits/stdc++.h> using namespace std; string removevowels(string s){ string result = ""; for(int i = 0; i < s.size(); i++){ char c = tolower(s[i]); if(c != 'a' && c != 'e' && c != 'i' && c != 'o' && c != 'u') result += s[i]; } return result; }
Implement a function that takes a list of integers as input and returns the count of numbers that are divisible by 3 and 5.	#include<bits/stdc++.h> using namespace std; int divisibleby35(vector<int>v){ int count=0; for(int i=0;i<v.size();i++){ if(v[i]%3==0&&v[i]%5==0) count++; } return count; }
Write a function that takes a list of character strings as input and returns the longest string in the list.	#include<bits/stdc++.h> using namespace std; string longeststring(vector<string>v){ string longest = ""; for(int i = 0; i < v.size(); i++){ if(v[i].size() > longest.size()){ longest = v[i]; } } return longest; }
Define a function that takes two lists of integers as input and returns a new list that contains the intersection of the two lists.	#include<bits/stdc++.h> using namespace std; vector<int> intersection(vector<int>v1,vector<int>v2){ vector<int>result; for(int i = 0; i < v1.size(); i++){ for(int j = 0; j < v2.size(); j++){ if(v1[i] == v2[j]){ result.push_back(v1[i]); break; } } } return result; }
Define a function that takes a list of strings as input and returns a new list that includes only the strings with a length greater than 3.	``` #include<bits/stdc++.h> using namespace std; vector<string> filterstrings(vector<string>v){ vector<string>result; for(int i = 0; i < v.size(); i++){ if(v[i].size()>3) result.push_back(v[i]); } return result; }
Write a function that takes a list of integers as input and returns a dictionary where each key is a number from the list and its corresponding value is the square of the number.	``` #include<bits/stdc++.h> using namespace std; unordered_map<int,int> squaresdictionary(vector<int>v){ unordered_map<int,int>result; for(int i = 0; i < v.size(); i++){ result[v[i]]=v[i]*v[i]; } return result; }
Implement a function that takes a list of integers as input and returns the count of numbers that are greater than the average of the list.	``` #include<bits/stdc++.h> using namespace std; int countgreaterthanavg(vector<int>v){ int sum=0; for(int i=0;i<v.size();i++){ sum+=v[i]; } double avg=sum*1.0/v.size(); int count=0; for(int i=0;i<v.size();i++){ if(v[i]>avg) count++; } return count; }
Write a function that takes a list of character strings as input and returns a new list that includes only the strings that start with a lowercase letter.	``` #include<bits/stdc++.h> using namespace std; vector<string> filterlowercase(vector<string>v){ vector<string>result; for(int i = 0; i < v.size(); i++){ if(tolower(v[i][0]) == v[i][0]) result.push_back(v[i]); } return result; }
Write a function that takes a string as input and returns the string with all vowels removed.	```cpp #include <iostream> #include <string> using namespace std; string removeVowels(string str) { string result = ""; for (int i = 0; i < str.length(); i++) { char c = tolower(str[i]); if (c != 'a' && c != 'e' && c != 'i' && c != 'o' && c != 'u') { result += str[i]; } } return result; } int main() { string str; cout << "Enter a string: "; getline(cin, str); cout << "String with vowels removed: …
You need to write a C++ function that takes a list of integers as input and returns the average of all the numbers.	```cpp #include <iostream> #include <vector> using namespace std; double calculateAverage(vector<int> numbers) { double sum = 0.0; for (int num : numbers) { sum += num; } return sum / numbers.size(); } int main() { vector<int> numbers; int n; cout << "Enter the number of elements: "; cin >> n; for (int i = 0; i < n; i++) { int num; cout << "Enter element " << i + 1 << ": "; cin >> num; numbers.pu…
Write a function that takes a list of integers as input and returns True if the list is in ascending order, and False otherwise.	```cpp #include <iostream> #include <vector> using namespace std; bool isInAscendingOrder(vector<int> numbers) { for (int i = 0; i < numbers.size() - 1; i++) { if (numbers[i] > numbers[i + 1]) { return false; } } return true; } int main() { vector<int> numbers; int n; cout << "Enter the number of elements: "; cin >> n; for (int i = 0; i < n; i++) { int num; cout << "Enter element " << i + 1 << ":…
You need to write a C++ function that takes an integer as input and returns the number of digits in the integer.	```cpp #include <iostream> using namespace std; int countDigits(int num) { int count = 0; while (num != 0) { count++; num /= 10; } return count; } int main() { int num; cout << "Enter an integer: "; cin >> num; cout << "Number of digits: " << countDigits(num) << endl; return 0; }
Write a function that takes two integers as input and returns the greatest common divisor (GCD) of the two numbers.	```cpp #include <iostream> using namespace std; int calculateGCD(int num1, int num2) { while (num2 != 0) { int temp = num2; num2 = num1 % num2; num1 = temp; } return num1; } int main() { int num1, num2; cout << "Enter the first integer: "; cin >> num1; cout << "Enter the second integer: "; cin >> num2; cout << "Greatest common divisor: " << calculateGCD(num1, num2) << endl; return 0; }
Write a function that takes a list of strings as input and returns the longest string in the list.	#include <vector> #include <string> #include <algorithm> std::string longest_string(const std::vector<std::string>& strings) { if (strings.empty()) { return ""; } std::string longest = strings[0]; for (const auto& str : strings) { if (str.length() > longest.length()) { longest = str; } } return longest; }
Given a list of integers and a target sum, write a function that returns the indices of the two integers in the list that add up to the target sum. If no such pair exists, return two indices that point to the end of the list.	#include <vector> #include <unordered_map> std::pair<int, int> find_indices(const std::vector<int>& numbers, int target) { std::unordered_map<int, int> num_indices; for (int i = 0; i < numbers.size(); i++) { int complement = target - numbers[i]; if (num_indices.count(complement)) { return {num_indices[complement], i}; } num_indices[numbers[i]] = i; } return {numbers.size() - 1, numbers.size() - 1…
Write a function that takes a list of integers as input and returns the frequency of each integer in the list.	#include <vector> #include <unordered_map> std::unordered_map<int, int> count_frequencies(const std::vector<int>& numbers) { std::unordered_map<int, int> frequencies; for (const auto& num : numbers) { if (frequencies.count(num)) { frequencies[num]++; } else { frequencies[num] = 1; } } return frequencies; }
Given a list of integers, write a function that returns the maximum product of two integers in the list. If the list contains less than two integers, return -1.	#include <vector> #include <algorithm> int max_product(const std::vector<int>& numbers) { if (numbers.size() < 2) { return -1; } std::partial_sort(numbers.begin(), numbers.begin() + 2, numbers.end(), std::greater<int>()); int max_product = numbers[0] * numbers[1]; std::partial_sort(numbers.rbegin(), numbers.rbegin() + 2, numbers.rend(), std::greater<int>()); max_product = std::max(max_product, nu…
Write a function that takes a list of strings as input and returns the string that appears most frequently in the list. If multiple strings appear with the same maximum frequency, return the first string encountered with that frequency.	#include <vector> #include <string> #include <unordered_map> std::string most_frequent_string(const std::vector<std::string>& strings) { if (strings.empty()) { return ""; } std::unordered_map<std::string, int> frequencies; for (const auto& str : strings) { if (frequencies.count(str)) { frequencies[str]++; } else { frequencies[str] = 1; } } std::string most_frequent = strings[0]; int max_frequency…
Write a function that takes a string as an input and returns the number of words in the string.	```cpp int countWords(string str) { int count = 0; string word = ""; for (char c : str) { if (c == ' ') { count++; } } if (!str.empty()) { count++; } return count; }
Write a function that takes a list of integers as input and returns the absolute difference between the sum of all the positive numbers and the sum of all the negative numbers.	```cpp int diffSum(vector<int> numbers) { int sumPos = 0, sumNeg = 0; for (int num : numbers) { if (num > 0) { sumPos += num; } else { sumNeg += num; } } return abs(sumPos - sumNeg); }
Design a function that takes two integers as input and returns their product.	```cpp int multiply(int a, int b) { return a * b; }
Write a function that takes a string as input and returns the string with all uppercase letters converted to lowercase.	```cpp string toLower(string str) { string modifiedStr = ""; for (char c : str) { if (isupper(c)) { modifiedStr += tolower(c); } else { modifiedStr += c; } } return modifiedStr; }
Create a function that takes a list of strings as input and returns the longest string in the list.	```cpp string findLongest(vector<string> strings) { string longestStr = ""; for (string str : strings) { if (str.length() > longestStr.length()) { longestStr = str; } } return longestStr; }
Write a function that takes a string as input and returns the string with all vowels removed.	#include <iostream> #include <string> using namespace std; string removeVowels(string str) { string result = ""; for (int i = 0; i < str.length(); i++) { char c = tolower(str[i]); if (c != 'a' && c != 'e' && c != 'i' && c != 'o' && c != 'u') { result += str[i]; } } return result; }
Write a function that takes a list of integers as input and returns the number of even numbers in the list.	#include <iostream> #include <vector> using namespace std; int countEvenNumbers(vector<int> nums) { int count = 0; for (int i = 0; i < nums.size(); i++) { if (nums[i] % 2 == 0) { count++; } } return count; }
Write a function that takes a list of integers as input and returns the number of prime numbers in the list.	#include <iostream> #include <vector> using namespace std; bool isPrime(int num) { if (num <= 1) { return false; } for (int i = 2; i * i <= num; i++) { if (num % i == 0) { return false; } } return true; } int countPrimeNumbers(vector<int> nums) { int count = 0; for (int i = 0; i < nums.size(); i++) { if (isPrime(nums[i])) { count++; } } return count; }
Write a function that takes a string as input and returns the string reversed.	#include <iostream> #include <string> using namespace std; string reverseString(string str) { string result = ""; for (int i = str.length() - 1; i >= 0; i--) { result += str[i]; } return result; }
Write a function that takes a list of integers as input and returns the sum of all the numbers in the list that are greater than the average of the list.	#include <iostream> #include <vector> using namespace std; int sumAboveAverage(vector<int> nums) { int sum = 0; double average = 0.0; for (int i = 0; i < nums.size(); i++) { sum += nums[i]; } average = (double)sum / nums.size(); sum = 0; for (int i = 0; i < nums.size(); i++) { if (nums[i] > average) { sum += nums[i]; } } return sum; }
Write a function that takes a string as input and returns the number of vowels in the string.	```cpp int countVowels(string str) { int count = 0; for (char c : str) { c = tolower(c); if (c == 'a' || c == 'e' || c == 'i' || c == 'o' || c == 'u') { count++; } } return count; }
Write a function that takes an integer as input and returns the sum of all its digits.	```cpp int sumDigits(int num) { int sum = 0; while (num != 0) { sum += num % 10; num /= 10; } return sum; }
Write a function that takes a list of strings as input and returns the longest string in the list.	```cpp string longestString(vector<string> strings) { string longest = ""; for (string str : strings) { if (str.length() > longest.length()) { longest = str; } } return longest; }
Write a function that takes two lists of integers as input and returns their intersection, i.e., the list of elements common to both lists.	```cpp vector<int> intersection(vector<int> list1, vector<int> list2) { vector<int> intersection; for (int num : list1) { if (find(list2.begin(), list2.end(), num) != list2.end()) { intersection.push_back(num); } } return intersection; }
Write a function that takes a list of integers as input and returns the list with all duplicates removed.	```cpp vector<int> removeDuplicates(vector<int> list) { vector<int> uniqueList; for (int num : list) { if (find(uniqueList.begin(), uniqueList.end(), num) == uniqueList.end()) { uniqueList.push_back(num); } } return uniqueList; }
Write a function to find the product of all odd numbers in a list of integers and return the product.	```cpp #include <vector> #include <numeric> int productOfOddNumbers(std::vector<int> nums) { int product = 1; for (int num : nums) { if (num % 2 != 0) { product *= num; } } return product; }
Develop a function that takes a list of strings as input and returns the count of all strings that have at least one vowel.	```cpp #include <vector> #include <string> #include <cctype> int countStringsWithVowels(std::vector<std::string> strings) { int count = 0; for (const std::string& str : strings) { bool hasVowel = false; for (char c : str) { c = std::tolower(c); if (c == 'a' || c == 'e' || c == 'i' || c == 'o' || c == 'u') { hasVowel = true; break; } } if (hasVowel) { count++; } } return count; }
Write a function that takes a list of integers as input and returns the maximum sum of a subarray.	```cpp #include <vector> #include <algorithm> int maxSubarraySum(std::vector<int> nums) { int maxSum = nums[0]; int currSum = nums[0]; for (int i = 1; i < nums.size(); i++) { currSum = std::max(nums[i], currSum + nums[i]); maxSum = std::max(maxSum, currSum); } return maxSum; }
Develop a function that takes a list of integers as input and returns a list of integers where each element is the square of the corresponding element in the input list.	```cpp #include <vector> std::vector<int> squareList(std::vector<int> nums) { std::vector<int> squares; for (int num : nums) { squares.push_back(num * num); } return squares; }
Write a function that takes a list of strings as input and returns the longest string that starts with a vowel.	```cpp #include <vector> #include <string> #include <cctype> std::string longestVowelStartingString(std::vector<std::string> strings) { std::string longestString; for (const std::string& str : strings) { if (!str.empty() && (std::tolower(str[0]) == 'a' || std::tolower(str[0]) == 'e' || std::tolower(str[0]) == 'i' || std::tolower(str[0]) == 'o' || std::tolower(str[0]) == 'u')) { if (str.size() > l…
Create a function that takes a string as input and returns True if the string is in uppercase, False otherwise.	bool isUppercase(string s) { for (int i = 0; i < s.length(); i++) { if (!isupper(s[i])) { return false; } } return true; }
Write a function that takes a list of integers as input and returns the count of even numbers in the list.	int countEvens(vector<int> nums) { int count = 0; for (int num : nums) { if (num % 2 == 0) { count++; } } return count; }
Write a class called "Rectangle" with two attributes "length" and "width" and two methods "area" and "perimeter".	class Rectangle { public: int length; int width; Rectangle(int l, int w) { length = l; width = w; } int area() { return length * width; } int perimeter() { return 2 * (length + width); } };
Create a function that takes a list of strings as input and returns the string with the maximum length.	string maxLengthString(vector<string> strs) { string maxStr = ""; for (string s : strs) { if (s.length() > maxStr.length()) { maxStr = s; } } return maxStr; }
Write a function that takes an integer as input and returns the number of digits in the integer.	int countDigits(int num) { int count = 0; while (num != 0) { num /= 10; count++; } return count; }
Write a function called remove_consecutive_duplicates that takes a list of integers as input and returns a new list where all consecutive duplicates are removed.	```c++ #include<vector> std::vector<int> remove_consecutive_duplicates(std::vector<int> input_list) { std::vector<int> result; for(int i = 0; i < input_list.size(); i++) { if(i == 0 || input_list[i] != input_list[i - 1]) { result.push_back(input_list[i]); } } return result; }
Write a function that takes a string as input and returns the string with all non-alphabetic characters removed.	```c++ #include<string> std::string remove_non_alphabetic(std::string input_string) { std::string result; for(char c : input_string) { if((c >= 'a' && c <= 'z') || (c >= 'A' && c <= 'Z')) { result += c; } } return result; }
Write a function called calculate_average that takes a list of integers as input and returns the average of all the integers in the list.	```c++ #include<vector> double calculate_average(std::vector<int> input_list) { double sum = 0; for(int num : input_list) { sum += num; } return sum / input_list.size(); }
Write a function that takes a string as input and returns the string in reverse order.	```c++ #include<string> std::string reverse_string(std::string input_string) { std::string result; for(int i = input_string.size() - 1; i >= 0; i--) { result += input_string[i]; } return result; }
Write a function called counturrences that takes a list of strings and a target string as input, and returns the number of occurrences of the target string in the list.	```c++ #include<vector> int counturrences(std::vector<std::string> input_list, std::string target) { int count = 0; for(std::string str : input_list) { if(str == target) { count++; } } return count; }
Write a function `max_absolute_difference` that takes a list of integers as input and returns the maximum absolute difference between any two elements in the list.	```cpp #include <iostream> #include <vector> #include <algorithm> int max_absolute_difference(const std::vector<int>& int_list) { if (int_list.empty()) { return 0; } int max_element = *std::max_element(int_list.begin(), int_list.end()); int min_element = *std::min_element(int_list.begin(), int_list.end()); return max_element - min_element; } int main() { std::vector<int> int_list = {4, 2, 9, 7, 5…
Write a function `common_elements` that takes two lists of integers as input and returns a list of common elements between the two lists.	```cpp #include <iostream> #include <vector> #include <set> std::vector<int> common_elements(const std::vector<int>& list1, const std::vector<int>& list2) { std::set<int> set1(list1.begin(), list1.end()); std::set<int> set2(list2.begin(), list2.end()); std::vector<int> common_elements; for (int element : set1) { if (set2.count(element)) { common_elements.push_back(element); } } return common_elem…
Write a function `string_to_uppercase` that takes a string as input and returns the string in uppercase.	```cpp #include <iostream> #include <string> #include <cctype> std::string string_to_uppercase(const std::string& input_string) { std::string uppercase_string; for (char c : input_string) { uppercase_string += std::toupper(c); } return uppercase_string; } int main() { std::string input_string = "hello world"; std::string result = string_to_uppercase(input_string); std::cout << "Uppercase string: …
Write a function `sort_in_descending_order` that takes a list of integers as input and returns the list in descending order.	```cpp #include <iostream> #include <vector> #include <algorithm> std::vector<int> sort_in_descending_order(const std::vector<int>& input_list) { std::vector<int> sorted_list = input_list; std::sort(sorted_list.begin(), sorted_list.end(), std::greater<int>()); return sorted_list; } int main() { std::vector<int> input_list = {4, 2, 9, 7, 5, 1, 8, 3, 6}; std::vector<int> result = sort_in_descending…
Write a function to find the maximum element in a given array of integers.	```cpp #include <iostream> using namespace std; int findMax(int arr[], int n) { int max = arr[0]; for(int i = 1; i < n; i++) { if(arr[i] > max) { max = arr[i]; } } return max; } int main() { int arr[] = {5, 2, 8, 12, 3}; int n = sizeof(arr) / sizeof(arr[0]); cout << "Maximum element in the array is " << findMax(arr, n) << endl; return 0; }
Create a class called Book that has attributes for the title, author, and publication year. The class should have methods to set and get each attribute.	```cpp #include <iostream> using namespace std; class Book { private: string title; string author; int publicationYear; public: void setTitle(string t) { title = t; } string getTitle() { return title; } void setAuthor(string a) { author = a; } string getAuthor() { return author; } void setPublicationYear(int year) { publicationYear = year; } int getPublicationYear() { return publicationYear; } };…
Write a function to calculate the average of all elements in a given array.	```cpp #include <iostream> using namespace std; double calculateAverage(int arr[], int n) { double sum = 0.0; for(int i = 0; i < n; i++) { sum += arr[i]; } return sum / n; } int main() { int arr[] = {2, 4, 6, 8, 10}; int n = sizeof(arr) / sizeof(arr[0]); cout << "Average of the array elements is " << calculateAverage(arr, n) << endl; return 0; }
Write a function to count the number of vowels in a given string.	```cpp #include <iostream> using namespace std; int countVowels(string str) { int count = 0; for(int i = 0; i < str.length(); i++) { char c = tolower(str[i]); if(c == 'a' || c == 'e' || c == 'i' || c == 'o' || c == 'u') { count++; } } return count; } int main() { string str = "Hello World"; cout << "Number of vowels in the string is " << countVowels(str) << endl; return 0; }
Create a class called Employee that has attributes for the employee ID, name, and salary. The class should have methods to set and get each attribute, and a method to calculate the annual salary.	```cpp #include <iostream> using namespace std; class Employee { private: int id; string name; double salary; public: void setId(int i) { id = i; } int getId() { return id; } void setName(string n) { name = n; } string getName() { return name; } void setSalary(double s) { salary = s; } double getSalary() { return salary; } double calculateAnnualSalary() { return salary * 12; } }; int main() { Emp…
Given a string, write a function that returns the number of times the substring "abc" appears in the string.	```cpp int count_abc_appearances(string str) { int count = 0; for (int i = 0; i < str.size() - 2; i++) { if (str[i] == 'a' && str[i + 1] == 'b' && str[i + 2] == 'c') { count++; } } return count; }
Write a function to find the nth Fibonacci number.	```cpp int find_nth_fibonacci(int n) { if (n <= 1) { return n; } int fib = 1; int prev_fib = 0; for (int i = 2; i <= n; i++) { int temp = fib; fib += prev_fib; prev_fib = temp; } return fib; }
Write a function to check if a given string is a palindrome.	```cpp bool is_palindrome(string str) { int start = 0; int end = str.size() - 1; while (start < end) { if (str[start] != str[end]) { return false; } start++; end--; } return true; }
Given a vector of integers, write a function to find the largest contiguous subarray sum.	```cpp int find_max_subarray_sum(vector<int> arr) { int max_sum = arr[0]; int current_sum = arr[0]; for (int i = 1; i < arr.size(); i++) { current_sum = max(arr[i], current_sum + arr[i]); max_sum = max(max_sum, current_sum); } return max_sum; }
Write a function to reverse the order of words in a given string.	```cpp string reverse_words_in_string(string str) { vector<string> words; string word = ""; for (char c : str) { if (c == ' ') { words.push_back(word); word = ""; } else { word += c; } } words.push_back(word); string reversed_str = ""; for (int i = words.size() - 1; i >= 0; i--) { reversed_str += words[i] + " "; } return reversed_str.substr(0, reversed_str.size() - 1); }
Write a function that takes in a list of integers and returns the count of numbers that are a perfect square.	```cpp int countPerfectSquares(vector<int> listOfIntegers) { int count = 0; for(int number : listOfIntegers) { double squareRoot = sqrt(number); if(squareRoot == int(squareRoot)) { count++; } } return count; }
Write a function that takes in a string and returns the count of vowels in the string.	```cpp int countVowels(string inputString) { int count = 0; for(char character : inputString) { character = tolower(character); if(character == 'a' || character == 'e' || character == 'i' || character == 'o' || character == 'u') { count++; } } return count; }
Write a function that takes in two integers and returns their greatest common divisor (GCD).	```cpp int calculateGCD(int numberOfDigits1, int numberOfDigits2) { if(numberOfDigits2 == 0) { return numberOfDigits1; } return calculateGCD(numberOfDigits2, numberOfDigits1 % numberOfDigits2); }
Write a function that takes in a list of strings and returns the longest string in the list.	```cpp string findLongestString(vector<string> listOfStrings) { string longestString = ""; for(string str : listOfStrings) { if(str.length() > longestString.length()) { longestString = str; } } return longestString; }
Write a function that takes in an integer and returns the sum of its digits.	```cpp int calculateSumOfDigits(int inputNumber) { int sum = 0; while(inputNumber != 0) { sum += inputNumber % 10; inputNumber /= 10; } return sum; }
Write a function that takes an integer as input and returns the factorial of that integer.	```cpp long long int factorial(int number) { long long int result = 1; for(int i = 1; i <= number; i++) { result *= i; } return result; }
Develop a function to find the maximum element in a 2D array.	```cpp int findMax(int arr[][3], int rows, int cols) { int maxElement = arr[0][0]; for(int i = 0; i < rows; i++) { for(int j = 0; j < cols; j++) { if(arr[i][j] > maxElement) { maxElement = arr[i][j]; } } } return maxElement; }
Create a function that takes a string as input and returns the string in uppercase.	```cpp string toUpperCase(string str) { for(int i = 0; i < str.length(); i++) { if(str[i] >= 'a' && str[i] <= 'z') { str[i] -= 32; } } return str; }
Write a function that takes a list of integers as input and returns the second smallest element.	```cpp int secondSmallest(int arr[], int n) { int firstMin = INT_MAX, secondMin = INT_MAX; for(int i = 0; i < n; i++) { if(arr[i] <= firstMin) { secondMin = firstMin; firstMin = arr[i]; } else if(arr[i] < secondMin && arr[i] != firstMin) { secondMin = arr[i]; } } return secondMin; }
Develop a function to check if a given year is a leap year or not.	```cpp bool isLeapYear(int year) { if(year % 4 == 0) { if(year % 100 == 0) { if(year % 400 == 0) { return true; } else { return false; } } else { return true; } } else { return false; } }
Write a function to calculate the sum of digits of a given integer number.	```cpp int sumOfDigits(int num) { int sum = 0; while (num != 0) { sum += num % 10; num /= 10; } return sum; } // inputs: num(int) // outputs: sum(int)
Develop a C++ program that takes a 2D vector of floats as input and returns the average value of the vector.	```cpp #include <vector> #include <numeric> float average2DVector(std::vector<std::vector<float>>& vec) { float sum = 0; int count = 0; for (auto& row : vec) { for (auto& val : row) { sum += val; count++; } } return sum / count; } // inputs: vec(vector<vector<float>>) // outputs: average(float)
Write a function that takes a list of strings as input and returns the string that appears most frequently in the list. If there's a tie, return the first string encountered.	```cpp #include <unordered_map> #include <string> #include <vector> std::string mostFrequentString(const std::vector<std::string>& strings) { std::unordered_map<std::string, int> freqMap; for (const std::string& str : strings) { freqMap[str]++; } int maxFreq = 0; std::string mostFrequentStr; for (const auto& pair : freqMap) { if (pair.second > maxFreq) { maxFreq = pair.second; mostFrequentStr = p…
Implement a function to check if a given integer number is an Armstrong number. An Armstrong number is a number that is equal to the sum of its own digits each raised to the power of the number of digits.	```cpp #include <cmath> bool isArmstrong(int num) { int power = std::to_string(num).length(); int sum = 0; int temp = num; while (temp != 0) { int digit = temp % 10; sum += std::pow(digit, power); temp /= 10; } return sum == num; } // inputs: num(int) // outputs: isArmstrong(bool)
Design a C++ function that accepts a list of integers as input and returns the count of prime numbers in the list.	```cpp #include <vector> bool isPrime(int num) { if (num <= 1) return false; for (int i = 2; i * i <= num; i++) { if (num % i == 0) return false; } return true; } int countPrimeNumbers(const std::vector<int>& numbers) { int count = 0; for (int num : numbers) { if (isPrime(num)) count++; } return count; } // inputs: numbers(vector<int>) // outputs: count(int)
Write a C++ function that takes a string as input and returns the frequency of the most commonly occurring character in the string.	```cpp #include <iostream> #include <string> #include <map> int mostCommonCharFrequency(std::string str) { std::map<char, int> frequencyMap; for (char c : str) { frequencyMap[c]++; } int maxFrequency = 0; for (auto& pair : frequencyMap) { if (pair.second > maxFrequency) { maxFrequency = pair.second; } } return maxFrequency; }
Write a C++ function that takes an integer as input and returns the sum of its digits.	```cpp #include <iostream> int sumOfDigits(int num) { int sum = 0; while (num > 0) { sum += num % 10; num /= 10; } return sum; }
Write a C++ function that takes a vector of integers as input and returns the count of the largest number.	```cpp #include <iostream> #include <vector> #include <algorithm> int countLargestNumber(std::vector<int> nums) { int largestNum = *std::max_element(nums.begin(), nums.end()); int count = 0; for (int num : nums) { if (num == largestNum) { count++; } } return count; }
Write a C++ function that takes a string as input and returns True if the string is a palindrome, False otherwise.	```cpp #include <iostream> #include <string> bool isPalindrome(std::string str) { int start = 0; int end = str.length() - 1; while (start < end) { if (str[start] != str[end]) { return false; } start++; end--; } return true; }
Write a C++ function that takes two vectors of integers as input and returns the intersection of the two vectors.	```cpp #include <iostream> #include <vector> #include <set> std::vector<int> intersectionVectors(std::vector<int> vec1, std::vector<int> vec2) { std::set<int> set1(vec1.begin(), vec1.end()); std::set<int> set2(vec2.begin(), vec2.end()); std::vector<int> intersection; for (int num : set1) { if (set2.find(num) != set2.end()) { intersection.push_back(num); } } return intersection; }
Define a function that takes a string as input and returns the number of vowels in the string.	```c++ int count_vowels(std::string str) { int count = 0; for (char c : str) { c = tolower(c); if (c == 'a' || c == 'e' || c == 'i' || c == 'o' || c == 'u') count++; } return count; }
Write a function that takes a vector of integers as input and returns the second largest number in the vector.	```c++ int second_largest(std::vector<int> vec) { int max = vec[0]; int second_max = vec[0]; for (int i = 1; i < vec.size(); i++) { if (vec[i] > max) { second_max = max; max = vec[i]; } else if (vec[i] > second_max && vec[i] != max) { second_max = vec[i]; } } return second_max; }
Write a function that takes a boolean as input and returns the opposite boolean value.	```c++ bool opposite(bool b) { return !b; }
Define a function that takes a vector of strings as input and returns the longest string in the vector.	```c++ std::string longest_string(std::vector<std::string> vec) { std::string longest = vec[0]; for (std::string str : vec) { if (str.length() > longest.length()) longest = str; } return longest; }
Write a function that takes two integers as input and returns their greatest common divisor (GCD).	```c++ int gcd(int a, int b) { if (b == 0) return a; else return gcd(b, a % b); }
Write a C++ function that takes a vector of integers as input and returns the sum of all odd numbers in the vector.	#include <vector> using namespace std; int sumOfOddNumbers(vector<int> nums) { int sum = 0; for (int num : nums) { if (num % 2 != 0) { sum += num; } } return sum; }
Given a string, write a C++ function that returns the string with all consonants removed.	#include <string> using namespace std; string removeConsonants(string s) { string result = ""; for (char c : s) { if (c == 'a' || c == 'e' || c == 'i' || c == 'o' || c == 'u' || c == 'A' || c == 'E' || c == 'I' || c == 'O' || c == 'U' || c == ' ') { result += c; } } return result; }
Write a C++ function that takes a vector of strings as input and returns a new vector containing only the strings with a length greater than 5.	#include <vector> #include <string> using namespace std; vector<string> filterStrings(vector<string> strs) { vector<string> result; for (string s : strs) { if (s.length() > 5) { result.push_back(s); } } return result; }
Given a vector of integers, write a C++ function that returns the count of all prime numbers in the vector.	#include <vector> using namespace std; bool isPrime(int num) { if (num <= 1) { return false; } for (int i = 2; i * i <= num; i++) { if (num % i == 0) { return false; } } return true; } int countPrimeNumbers(vector<int> nums) { int count = 0; for (int num : nums) { if (isPrime(num)) { count++; } } return count; }
Write a C++ function that takes a string as input and returns the string with all characters converted to uppercase.	#include <string> using namespace std; string toUppercase(string s) { for (char &c : s) { c = toupper(c); } return s; }
Write a function count_vowels to count the number of vowels in a given string.	```cpp #include <string> #include <cctype> int count_vowels(const std::string& str) { int count = 0; for (char c : str) { c = std::tolower(c); if (c == 'a' || c == 'e' || c == 'i' || c == 'o' || c == 'u') { count++; } } return count; }
Write a function is_palindrome to check if a given string is a palindrome.	```cpp #include <string> bool is_palindrome(const std::string& str) { int start = 0; int end = str.length() - 1; while (start < end) { if (str[start] != str[end]) { return false; } start++; end--; } return true; }
Write a function to check if a given number is a prime number.	```cpp int fibonacci(int n) { if (n <= 1) { return n; } return fibonacci(n-1) + fibonacci(n-2); }
Write a function to reverse a linked list.	```cpp bool is_prime(int num) { if (num <= 1) { return false; } for (int i = 2; i * i <= num; i++) { if (num % i == 0) { return false; } } return true; }
Calculate the average of a given array of integers.	```cpp #include <iostream> using namespace std; double calculateAverage(int arr[], int size) { int sum = 0; for(int i = 0; i < size; i++) { sum += arr[i]; } return static_cast<double>(sum) / size; } int main() { int arr[] = {1, 2, 3, 4, 5}; int size = sizeof(arr) / sizeof(arr[0]); double average = calculateAverage(arr, size); cout << "Average: " << average << endl; return 0; }
Check if a given string is a palindrome or not.	```cpp #include <iostream> #include <string> using namespace std; bool isPalindrome(string str) { int start = 0; int end = str.length() - 1; while(start < end) { if(str[start] != str[end]) { return false; } start++; end--; } return true; } int main() { string str = "madam"; bool isPalindrome = isPalindrome(str); if(isPalindrome) { cout << "The string is a palindrome." << endl; } else { cout << "T…
Find the maximum and minimum elements in a given array of integers.	```cpp #include <iostream> using namespace std; void findMaxMin(int arr[], int size, int &max, int &min) { max = arr[0]; min = arr[0]; for(int i = 1; i < size; i++) { if(arr[i] > max) { max = arr[i]; } if(arr[i] < min) { min = arr[i]; } } } int main() { int arr[] = {5, 2, 8, 1, 9}; int size = sizeof(arr) / sizeof(arr[0]); int max, min; findMaxMin(arr, size, max, min); cout << "Maximum: " << max <…
Determine whether a given integer is even or odd.	```cpp #include <iostream> using namespace std; bool isEven(int num) { return num % 2 == 0; } int main() { int num = 10; bool isEven = isEven(num); if(isEven) { cout << "The number is even." << endl; } else { cout << "The number is odd." << endl; } return 0; }
Calculate the factorial of a given non-negative integer.	```cpp #include <iostream> using namespace std; long long calculateFactorial(int num) { long long factorial = 1; for(int i = 1; i <= num; i++) { factorial *= i; } return factorial; } int main() { int num = 5; long long factorial = calculateFactorial(num); cout << "Factorial: " << factorial << endl; return 0; }
Create a function that takes a list of integers as input and returns the count of even numbers in the list.	```cpp #include<vector> int countEvenNumbers(std::vector<int> numbers) { int count = 0; for(int i = 0; i < numbers.size(); i++) { if(numbers[i] % 2 == 0) { count++; } } return count; }
Write a function that takes a list of strings as input and returns a new list that includes only the strings with a length greater than 5.	```cpp #include<vector> #include<string> std::vector<std::string> filterLongStrings(std::vector<std::string> strings) { std::vector<std::string> longStrings; for(int i = 0; i < strings.size(); i++) { if(strings[i].length() > 5) { longStrings.push_back(strings[i]); } } return longStrings; }
Define a function that takes a list of integers as input and returns the largest number in the list.	```cpp #include<vector> int findLargestNumber(std::vector<int> numbers) { int largest = numbers[0]; for(int i = 1; i < numbers.size(); i++) { if(numbers[i] > largest) { largest = numbers[i]; } } return largest; }
Create a function that takes a list of integers as input and returns a new list with the numbers in descending order.	```cpp #include<vector> #include<algorithm> std::vector<int> sortDescending(std::vector<int> numbers) { std::sort(numbers.begin(), numbers.end(), std::greater<int>()); return numbers; }
Write a function that takes a list of integers as input and returns the average of the numbers in the list.	```cpp #include<vector> double calculateAverage(std::vector<int> numbers) { double sum = 0.0; for(int i = 0; i < numbers.size(); i++) { sum += numbers[i]; } return sum / numbers.size(); }
Write a C++ function to check whether a given string is a palindrome or not.	```cpp #include <string> bool isPalindrome(std::string s) { int start = 0; int end = s.length() - 1; while (start < end) { if (s[start] != s[end]) { return false; } start++; end--; } return true; }
Write a C++ function that takes a string as input and returns the number of vowels in the string.	```cpp #include <string> int countVowels(std::string s) { int count = 0; for (char c : s) { c = tolower(c); if (c == 'a' || c == 'e' || c == 'i' || c == 'o' || c == 'u') { count++; } } return count; }
Create a C++ function that takes a list of integers as input and returns the median of the list.	```cpp #include <vector> #include <algorithm> double findMedian(std::vector<int> nums) { std::sort(nums.begin(), nums.end()); int n = nums.size(); if (n % 2 == 0) { return (nums[n/2 - 1] + nums[n/2]) / 2.0; } else { return nums[n/2]; } }
Write a C++ function that takes an integer as input and returns the sum of its digits.	```cpp int sumDigits(int n) { int sum = 0; while (n > 0) { sum += n % 10; n /= 10; } return sum; }
Create a C++ function that takes a string as input and returns the string with all vowels removed.	```cpp #include <string> std::string removeVowels(std::string s) { std::string result = ""; for (char c : s) { c = tolower(c); if (c != 'a' && c != 'e' && c != 'i' && c != 'o' && c != 'u') { result += c; } } return result; }
Write a function that takes a set of strings as input and returns the longest common prefix among all strings.	#include<bits/stdc++.h> using namespace std; string longestCommonPrefix(set<string> strSet) { if(strSet.empty()) return ""; string prefix = *(strSet.begin()); for(char &ch : prefix) { for(auto &str : strSet) { for(int i = 0; i < str.size(); i++) { if(ch != str[i]) { prefix = prefix.substr(0, i); ch = prefix.back(); break; } } } } return prefix; }
Create a function that takes an integer as input and checks whether it is a palindrome number or not.	#include<bits/stdc++.h> using namespace std; bool isPalindrome(int num) { int reversedNum = 0; int originalNum = num; while(num != 0) { int digit = num % 10; reversedNum = reversedNum * 10 + digit; num /= 10; } return originalNum == reversedNum; }
Write a function that takes a vector of integers as input and returns the maximum contiguous subarray sum.	#include<bits/stdc++.h> using namespace std; int maxSubArraySum(vector<int> vec) { int maxSoFar = vec[0]; int maxEndingHere = vec[0]; for(int i = 1; i < vec.size(); i++) { maxEndingHere = max(vec[i], maxEndingHere + vec[i]); maxSoFar = max(maxSoFar, maxEndingHere); } return maxSoFar; }
Create a function that takes a string as input and returns the count of vowels in the string.	#include<bits/stdc++.h> using namespace std; int countVowels(string str) { int count = 0; for(char &ch : str) { ch = tolower(ch); if(ch == 'a' || ch == 'e' || ch == 'i' || ch == 'o' || ch == 'u') { count++; } } return count; }
Write a function that takes two integers as input and returns their greatest common divisor using Euclidean algorithm.	#include<bits/stdc++.h> using namespace std; int gcd(int a, int b) { if(b == 0) return a; else return gcd(b, a % b); }
Write a function to find the maximum and minimum values in a given list of integers. Return a pair containing the maximum and minimum values.	#include<bits/stdc++.h> using namespace std; pair<int, int> findMaxMin(vector<int> numbers) { int maxVal = *max_element(numbers.begin(), numbers.end()); int minVal = *min_element(numbers.begin(), numbers.end()); return make_pair(maxVal, minVal); }
Implement a function to check if a given string is a palindrome. Return true if the string is a palindrome, false otherwise.	#include<bits/stdc++.h> using namespace std; bool isPalindrome(string str) { int left = 0; int right = str.length() - 1; while (left < right) { if (str[left] != str[right]) { return false; } left++; right--; } return true; }
Develop a function to calculate the sum of all elements in a given 2D list of integers. Return the sum as an integer.	#include<bits/stdc++.h> using namespace std; int calculateSum(vector<vector<int>> matrix) { int sum = 0; for (int i = 0; i < matrix.size(); i++) { for (int j = 0; j < matrix[i].size(); j++) { sum += matrix[i][j]; } } return sum; }
Write a function to find the first duplicate element in a given list of integers. Return the first duplicate element if found, -1 otherwise.	#include<bits/stdc++.h> using namespace std; int findFirstDuplicate(vector<int> numbers) { unordered_map<int, int> count; for (int i = 0; i < numbers.size(); i++) { if (count.find(numbers[i]) != count.end()) { return numbers[i]; } count[numbers[i]] = 1; } return -1; }
Implement a function to reverse the order of elements in a given list of strings. Return the reversed list.	#include<bits/stdc++.h> using namespace std; vector<string> reverseList(vector<string> strList) { reverse(strList.begin(), strList.end()); return strList; }
