# Supplementary material
Source: ML conference proceedings conference paper supplement (https://openreview.net/forum?id=8mM5NzC7da)
Supplement: supplementary_material [file OOD_samples_llama-3-70b-instruct_gsm8k.xlsx]

## Sheet: Sheet
Questions
Benny has three more books on his bookshelf than his brother. If Benny has 25 books on his bookshelf, how many books does his brother have?
Amir locked his bike outside the library. When he returned, he noticed that 20 more bikes were locked outside. If there were 50 bikes locked outside the library, how many were there originally?
Granny can knit 5 scarves per hour. If she knits for 4 hours, how many scarves does she knit?
Michael scored 45 points in a basketball game, and his teammate scored 15 points more than him. How many points did Michael and his teammate score altogether?
Coach Thompson's basketball team has 18 players, and 25% of them are centers. How many centers are there on Coach Thompson's basketball team?
In the city of Toronto, there are 50 more libraries than bookstores. Toronto has 2 times as many libraries as Ottawa. If Ottawa has 20 libraries, how many bookstores are there in Toronto?
In a basket of 1000 apples, 30% are red and of those, 20% are juicy. How many apples are both juicy and red?
In a construction site, there are 800 workers. 40% of the workers are engineers. Of those engineers, 60% have a degree. How many workers are engineers with a degree?
In the city of New York, the number of taxis is 150 more than the number of buses. New York has 3 times as many taxis as Chicago. If Chicago has 100 buses, how many taxis are there in New York?
In a factory that produces 2000 computers, 10% are laptops. Of those laptops, 30% are touchscreen. How many computers are both touchscreen and laptops?
Mark is working in a factory that produces 120 boxes of cookies per day. One-quarter of them are chocolate chip, one-third are peanut butter, and the rest are oatmeal raisin. How many boxes of oatmeal raisin cookies are produced daily?
A toy car track costs $15, a set of building blocks costs $25, and a puzzle costs $8. How much will you pay for two toy car tracks, three sets of building blocks, and four puzzles?
Samantha had 60 pencils in her art box. She gave 8 to her brother and 10 to her sister. After that, she got a new set of 18 colored pencils from her mom. Then, she found 5 more pencils hidden in her room. How many pencils does Samantha have now?
A bookshelf has five shelves, and each shelf can hold 8 books. If the bookshelf is currently empty, how many books can be placed in it in total?
James has 24 more stickers than his friend Alex. If Alex has 16 stickers, how many stickers do they have altogether?
A hardware store sells 30 bags of cement in a day. If the profit on each bag is $1.50 and the store makes $45 in profit, what is the cost price of each bag of cement?
Lissa and her sister Leila went to the market to buy flowers. They bought 18 red roses and 22 yellow roses. If Lissa bought 4 more flowers than Leila, how many flowers did Leila buy in total?
A snail is at the bottom of a 20-foot well. Each day, it climbs up 3 feet, but at night, it slips back 2 feet. How many days will it take for the snail to reach the top of the well?
A bakery produces 30 loaves of bread. They package 5 loaves in each bag. How many bags will they need to package all the loaves?
In a library, there are 18 shelves, each of which has 12 books. If 36 books are added to the library, how many books will each shelf need to hold if they are to be distributed equally?
Julia has 18 bags of apples. Each bag contains 4 baskets. Each basket contains 6 apples. How many apples does Julia have in total?
A basketball court is 28.7 meters long and a tennis court is 23.7 meters long. If both courts have same width, and the basketball court is 17.1 meters wide, what is the perimeter of the tennis court?
Emily has a total of 42 stickers. She gave 2 stickers to her sister, 5 to her brother, and then bought 8 more stickers. How many stickers does Emily have now?
At a water park, there are 4 water slides and each slide has 6 lanes. If 2/3 of the lanes are occupied, how many people are using the water slides?
Carlos has 12 bags of potatoes. Each bag contains 3 baskets. Each basket contains 5 potatoes. How many potatoes does Carlos have in total?
Ray is having a party. He has 20 classmates, 30 friends from work, and 5 friends from his gym. If 10 friends are coming with their dates, how many people are coming?
David has been riding his bike for an hour at 10 mph and then his second hour at 20 mph. What was his average speed in miles per hour?
Mary's flowers are all either roses, daisies, or lilies. There are 40 flowers, and the ratio of roses to daisies to lilies is 3:2:1. How many lilies does Mary have?
Ben gets 10 percent off of his purchase of 500 dollars from a store that already has a 20 percent discount on all items. How much will he pay for the items?
An apartment complex has 20 buildings. Each building has 10 floors, and each floor has 5 apartments. If 30 percent of the apartments are occupied, how many apartments are not occupied?
Sophia has 12 more pencils than Olivia. If Olivia has 15 pencils, how many pencils do they have altogether?
In a box of 300 cookies, 25% have nuts and one fifth of these are chocolate chip cookies. Assuming these proportions are exactly correct, how many cookies in the box are both chocolate chip and have nuts?
Every week of last quarter Alex tried out a new pizza recipe. The first week, he followed a pizza recipe that called for 30 cups of cheese. Each week after that, he increased the amount of cheese by a third. How much cheese did he use for the pizza on the fourth week?
Sofia is practicing yoga, for 3 hours each day. She decided to decrease her time spent on yoga weekly, by 6 hours. How much time does Sofia want to spend during one week on yoga?
To get his fill of strawberries, Harry has to eat at least three times as many strawberries as Emily does. If Emily eats 150 strawberries, how many strawberries do they eat altogether?
Maria has three times as many books as her brother, and her brother has two times as many books as her sister. If the sum of the books of Maria, her brother, and her sister is 420 books, then how many books does Maria's sister have?
A bakery sells apple pies for $8, cherry pies for $6, and chocolate cakes for $10. How much do you need to pay for five apple pies, three cherry pies, and two chocolate cakes?
A group of friends want to split some money they earned from a yard sale. If they have a total of $240 to split between 8 friends, how much will each friend get?
Rachel spends 3 hours daily playing the piano. She decides to increase her time spent on playing piano weekly by 6 hours. How much time does Rachel want to spend during one week on playing piano?
A farmer sells 30 kilograms of strawberries for $20 each. The seeds cost $150. How much does he make in profit?
Julia's family has 450 different books in their personal library. She borrows 75 books from her neighbor and then buys 225 books from the bookstore. What percentage of Julia's collection is borrowed from her neighbor?
If it takes Pat 5 hours to walk 30 km, and then she takes a taxi for 15 km to reach her final destination, what's the total time taken to complete her journey?
The speed limit on the highway is 80 km/h. If Tim drives at 96 km/h for 45 minutes, how many kilometers does he travel above the speed limit?
Olivia has a jar containing 850 red marbles, 400 blue marbles, 300 green marbles, and 150 yellow marbles. What percentage of marbles in the jar are not red?
A bakery has a total of 480 cookies packaged in 12 boxes. If the bakery owner distributes 120 cookies to charity, and then divides the remaining cookies equally among 8 boxes, how many cookies are in each box?
Mrs. Thompson is three times older than her daughter. If her daughter is 12 years old, how old will Mrs. Thompson be in 10 years?
Out of 500 students in a class, 300 are boys. If 120 boys and 80 girls are members of the school athletic team, how many girls are not members of the school athletic team?
John and Jane are two cyclist who cycle at different speeds. John cycles 20 miles in 2 hours, while Jane cycles 12 miles in 3 hours. If they start cycling at the same time, how many miles will they cycle altogether in 6 hours?
At the local grocery store, apples are sold in bags of 5 and oranges are sold in bags of 8. If Susan buys 4 bags of apples and 3 bags of oranges, how many fruits does she buy in total?
To qualify for a charity marathon, Adam must run at least 3 miles a day for 2 weeks. If he ran 42 miles in the first week, how many more miles does he need to run to qualify for the marathon?
Evelyn has 100 stickers, and she gave 45 to her friend Emily. If Evelyn gave 25% of her remaining stickers to her brother, how many stickers does Evelyn have left?
Tom is moving into a new apartment and needs to set up his bookshelf. He has 250 books to put away, with 100 fiction books, 30% of which are romance novels. How many romance novels does Tom have?
Olivia's aunt has a bakery and makes 400 cookies per day. She packs them into boxes of 25 cookies each. If she gives Olivia 15% of the total number of cookies she makes, how many cookies does Olivia get?
Samantha can fit 25 students in her small van. She has three trips to the amusement park with students from her school. If each trip has an equal number of students, and she took 75 students in total, how many students went on the first trip?
Alex is trying to save money for a new bike, which costs $400. He has saved $150 so far and plans to save an equal amount every month. If he wants to buy the bike in 6 months, how much will Alex need to save each month?
A bakery has 240 muffins and 300 cookies. If the bakery wants to package the same number of muffins as cookies in each box, how many boxes can the bakery make with 12 items in each box?
A farmer has 240 apples, 180 bananas, and some oranges. If the total number of fruits is 480, how many oranges does the farmer have?
A factory produces toys with a ratio of one toy car to three toy dolls. If the factory produced 240 toy cars in one day, how many toy dolls did it produce that day?
In a bookshelf, there are 240 novels and some non-fiction books. If 30% of the books are non-fiction, how many non-fiction books are there in the bookshelf?
A company has 40 employees, and each employee earns $25,000 per year. If the total salary of the company is $1,100,000, how many more employees do they need to hire to reach the total salary?
There are 800 students attending college at the Springfield University. Of these students, 40% are in their freshman year. Of the freshman, 25% are majoring in business. How many business major freshman students are there?
In Chef’s kitchen, there are 12 trays of bread rolls. Each tray contains 16 bread rolls. 20% of the bread rolls are whole wheat. How many whole wheat bread rolls are there?
There are 120 puppies at the animal shelter. Of those puppies, 30% are Cocker Spaniels. Of the Cocker Spaniels, 40% are puppies under 6 months old. How many puppies under 6 months old are Cocker Spaniels?
Mrs. Smith orders groceries online. She receives a package with 8 boxes of pasta. Each box contains 12 packets of pasta. If she uses 25% of a packet for one meal, how many meals can she make with her pasta?
A bookshelf has 15 shelves, with 8 books on each shelf. Of these books, 40% are fiction. How many fiction books are there?
After 7 years, Maria will be 3 times as old as her brother, John. Right now, Maria is 19 years old. What is John's age today?
A bakery sells 600 loaves of bread per day. 2/3 of them are whole wheat, 1/5 are rye, and the remaining 60 are white bread. What is the number of rye loaves sold daily?
5 friends - Alex, Ben, Chris, David, and Eric - are driving to a concert. Alex's car speeds 75 mph, while Ben's car goes 65 mph. Chris, David, and Eric take a train that travels at 90 mph. If they all left at the same time and the concert venue is 240 miles away, how many miles ahead is the train after 2 hours?
Of the 900 students in a school, 420 are members of sports teams, 270 are members of clubs, and 90 students are part of both. How many students are not part of any sports teams or clubs?
The length of a rectangular swimming pool is 4 times its width. If a path that is 3 meters wide is built around the pool, the area of the path is 108 square meters. What is the perimeter of the pool?
Rachel is planning a road trip. She estimates that the cost of fuel will be 2 cents per mile. If she drives a total of 240 miles per day for 8 days, and she has a budget of $50 for fuel, will she exceed her budget?
Samantha has a special talent in decorating cakes. She charges $12 for a traditional cake and $25 for a custom cake. If she decorated 4 traditional cakes and 2 custom cakes in a day, how much money did she make in total?
In a certain town, the cost of electricity is 7 cents per kilowatt-hour. If a certain resident uses an average of 600 kilowatt-hours per month, how much does he pay in electricity per month?
Emily is making lemonade for a party. She needs 3 tablespoons of lemon juice for every 2 cups of water. If she wants to make 6 cups of lemonade, how much lemon juice will she need?
James buys a water filter every 12 months. The cost of a filter is $20. If James has already bought 2 filters and he wants to buy another 4 filters, how much will he need to spend in total?
Maya has a total of 120 pencils in her pencil case. She gives 15% of them to the classroom and another 20% to her best friend. How many pencils does Maya have left?
Olivia has a flower garden with 60 flowers. She adds 10% more flowers every week. If she adds 10% flowers for 3 weeks in a row, how many flowers does she end up with in total?
Tim is waiting for his mom to pick him up from soccer practice. He has 18 minutes left on the timer and reads 6 pages of his book in every 3 minutes. How many pages does he read before his mom arrives?
Ruby's favorite game is collecting stickers. She starts with 20 stickers. Her grandma gives her 20% more stickers each month, and she buys 10 more stickers every 2 months. How many stickers does Ruby have after 6 months?
Ian is trying to get to a total of 300 community service hours for college. If he has already completed 90 hours and volunteers for 5 hours a week, how many more weeks does he need to volunteer to reach his goal?
Isaac has 24 boxes of crayons in his art studio. He gives 4 boxes to his fellow artist Maya. If he then buys 6 more boxes, how many boxes of crayons does Isaac have now?
There are 30 computers in the library. 60 percent of them have internet access. Of those computers with internet access, 70% have a working printer. How many computers have both internet access and a working printer?
A school has 250 students. 30% of the students ride the bus to school. If 15 of those students who ride the bus also walk to school, how many students do not ride the bus to school?
Laura has 60 stickers in her collection. She gives 8 stickers to her sister Emma. She then buys a new pack with 18 stickers. If Emma gives back 4 of the stickers to Laura, how many stickers does Laura have now?
At a bookstore, every paperback costs $2, every e-book $5, and a hardcover $10. How much do you need to pay for four paperbacks, three e-books, and two hardcovers?
Ashley, a swimming instructor, has 50 pupils in her morning class. Of those pupils, 40 percent have siblings in the afternoon class. Of those who have siblings in the afternoon class, 80 percent have cousins in the evening class. How many pupils have cousins in the evening class?
A family of four will be going on a road trip, covering a total distance of 2,800 miles. If they have been driving for 5 hours at an average speed of 70 mph, how many miles are left to cover?
Mikayla has 90 stickers and she wants to put them into notebooks that hold 10 stickers each. How many notebooks can she buy?
A school's cafeteria has 4,500 cookies for the bake sale event. Of those cookies, 65 percent were sold within the first 2 hours, and 25 percent of the remaining cookies were sold within the last 3 hours. How many cookies were left over?
Antonio, a librarian, has 350 books on a shelf. He gets a new bookcase that holds 50 books per shelf, and he decides to put half of the books on the new shelves. How many shelves are needed on the new bookcase?
A factory produces 300 toys in an hour and 240 in an hour. How many toys does the factory produce in 7 hours?
Jamie spent $300 on his new laptop, which was 20% more than the cost of his phone. How much did his phone cost?
A group of students walked for 2 hours at a speed of 5 km/h and then walked 3 hours at a speed of 3 km/h. How far did they walk in total?
A bookshelf has 6 rows of books and each row has 10 books. How many books does the bookshelf have in total if 12 books are removed?
A bakery makes 80 cupcakes for sale on Saturday and 100 on Sunday. If they sell each cupcake for $2, how much money do they make on the weekend?
Lucas has a lot of pencils in his pencil case. He has 120 colored pencils in a bag. In another bag, he has 20 more colored pencils than he does in the pencil case. If he has 40 more pencils in the pencil case than he does in the first bag, how many colored pencils does Lucas have in total?
Alex has stuffed animals. Alex has 4 teddy bears, twice as many monkeys as teddy bears, and 6 more rabbits than monkeys. How many stuffed animals does Alex have?
In a bakery, 320 loaves of bread are baked daily. On Monday, the bakery made 50 more loaves than usual, and on Tuesday, they made 80 less loaves than on Monday. If on Wednesday the bakery produced 20 more loaves than on Tuesday, how many loaves of bread were baked on Wednesday?
Leo has a comic book collection. He has 200 Marvel comics, twice as many DC comics as Marvel comics, and 50 more indie comics than DC comics. How many comic books does Leo have in total?
Mr. Kelly's classroom has 30 rows of desks with 8 desks in each row. In addition, there are 10 desks in the back of the classroom. His school buys him 60 more desks. How many desks does Mr. Kelly have in total?
The flower shop has 15 more vases than bouquets. The number of bouquets is three times as many as the number of flower stands. If there are 45 vases, how many flower stands are there?
The manager of a company used 3 computers for every 5 employees. If the company has 60 employees, how many computers did the manager use?
Hernando is making smoothies. He uses 20 strawberries for every 30 blueberries. If he needs 60 strawberries, how many blueberries will he use?
There are 8 buses in a parking lot. The number of cars in the lot is equal to twice the number of buses minus 4. If there are 20 cars, how many buses were added or removed?
A bookshelf has 5 shelves, and each shelf can hold 8 books. If the bookshelf is currently empty, how many books can be placed on it in total?
Emily started with 120 cans of soda in her store. After a week, she was left with 30 cans. How many cans did she sell during that week?
The rectangular garden of Alana measures 25 meters by 40 meters. She decides to decrease the length by 15 meters and the width by 5 meters. What is the area of the new garden?
Eight painters are working on painting the city hall. Five painters can paint 35 walls in 7 days. How many walls will 8 painters paint in 8 days?
Mason and Miranda have a total of 320 dollars. Mason has 60 more dollars than Miranda. How much money does Miranda have?
Lucy is making pizzas for her party. She needs 2 cups of flour for every 3 cups of sauce. She has 12 cups of sauce. How many cups of flour does she need?
Liam has a bag of 55 chocolates and wants to pack them into small bags that hold 5 chocolates each. How many bags can Liam fill with chocolates?
Abigail’s bookshelf has 4 shelves with 8 books on each shelf. She buys 3 more shelves and adds 12 more books. How many books does Abigail have now?
Emma’s mom bakes 3 batches of cookies with 18 cookies in each batch. She accidentally eats 2 cookies from the last batch. How many cookies are left?
Max, an avid bird watcher, observes 12 eagles, 15 hawks, and 20 sparrows in a forest. He noticed that 4 eagles, 6 hawks, and 8 sparrows left the forest. What percentage of birds left the forest?
Rachel collects stamps from different countries. She has 25 Australian stamps, 45 Japanese stamps, and 35 Canadian stamps. She wants to divide them equally among 5 stamp albums. How many stamps will each album contain?
In a parking lot with 300 cars, 15% have only two wheels. Of these, one-fifth have only one safety feature. Assuming these proportions are exactly correct, how many two-wheeled cars in the parking lot have only one safety feature?
Emily sold 12 fewer books than Richard. If Richard sold 21 books, how many books did they sell altogether?
Samantha ate 3/4 of a pizza that originally had 16 slices. How many slices of pizza did Samantha eat?
In a factory there are 1200 light bulbs, and 1/3 of them are broken. Of the broken ones, 2/3 of them have been replaced. How many light bulbs have been replaced?
Tom has 240 marbles in a jar. He divides them into 8 equal groups. How many marbles are in each group?
Peter is making a special trail mix for his hiking trip. He has peanuts that cost $6 per pound, cashews that cost $8 per pound, and almonds that cost $5 per pound. If he wants to make a mix of 20 pounds in total, with a ratio of 2:3:5 of the three ingredients, how much will the trail mix cost him in total?
Tom has a rectangular garden with dimensions 15 meters by 20 meters. He wants to put a fence around the whole garden. The fencing costs $10 per meter. He has already fenced 40 meters. How much more money does Tom need to spend to complete the fencing of his garden?
A bakery sells a total of 480 muffins and cakes on Monday. The number of muffins sold was 80 more than the number of cakes sold. How many muffins were sold on Monday?
John has been saving money for a new bike and has $120 in his piggy bank. He wants to buy a bike that costs $250. His parents agreed to give him $20 per week as an allowance. In how many weeks will John be able to buy the bike?
A car rental company charges $30 per day plus an additional 20 cents per mile driven. If Rachel drove 240 miles and rented the car for 5 days, how much did she pay in total for the car rental?
Olivia had 15 stickers in her sticker book. Her friend Lucy gave her another 7 stickers. She then bought a sticker packet that contained 25 stickers. If she gave her sister 8 stickers, how many stickers does Olivia have now?
Mateo's backyard took him 1 hour and 30 minutes to mow last week. This week, he needs to mow 3 times as much as last week, and he has 4 hours to finish the task. Does he have enough time to mow his backyard this week?
Teddy Baker makes a type of cookie that requires 3 cups of flour to make 4 batches of cookies. If Teddy wants to make 10 batches of cookies, how many cups of flour will he need?
If 7 apples cost $3, how many apples can you buy with $15?
In a school of 1200 students, 450 are boys and 250 are in the band. If one-quarter of the boys are in the band, how many boys are in the band?
A restaurant has 90 tables and 15% of the table are occupied. How many tables are occupied?
A bookstore owner has 400 books in the store, but 1/8 of them are sold out. How many books are sold out?
Peter's car can travel 240 miles on one tank of gasoline, but the tank is only filled to 2/3. How many miles can Peter travel with the current amount of gas?
A library has a total of 100 shelves, and there are 5 bookshelves assigned to fiction, 20 bookshelves assigned to non-fiction, and an equal number of bookshelves assigned to biographies and poetry. How many bookshelves are assigned to poetry?
A factory produces 400 bags of wheat flour per day. If it operates 6 days a week, and 80 bags are sent to each of the 4 supermarkets, how many bags of flour are left?
A bakery sells buns in packs of 4 for $2, and also sells mini-buns in packs of 8 for $4. If you want to buy 16 buns and 16 mini-buns, how much do you need to pay in total?
In a hospital, 1 out of 5 patients have a fever, 1 out of 4 have broken bones, and 2 out of 5 have asthma. If there are 160 patients in the hospital, how many have asthma and a fever?
To make a necklace, you need a ratio of 3 beads to 2 pendants. If you need 15 beads to make a necklace, how many pendants do you need?
A toy car manufacturer produces 80 cars per hour. They operate for 8 hours a day, 7 days a week. How many cars do they produce in a week?
A pool has a ratio of 3 parts chlorine to 7 parts water. If you need 21 parts water, how many parts chlorine do you need?
For a 100 mile long trip, Tom drives at a speed of 40 miles per hour. How many more minutes would it take him to drive 150 miles if he drove at 30 miles per hour instead?
At the amphitheater, the number of men attending the concert is 180% of the number of women attending the concert. If 270 women attended the concert, what percentage of the total attendees were men?
A bookshelf contains 12 shelves, each with 5 books on it. The bookstore received an order of 10 books from the publisher. How many books will they have in total after unpacking the new order?
The total cost of a sandwich, drink, and dessert at a bakery is 15 dollars when they are purchased separately. If the bakery offers a combo meal of a sandwich, drink, and dessert for 12 dollars, how much will a customer save by buying the combo meal?
If a company hires an additional worker for 5 days a week, the workload on each employee will be reduced by 2 hours a day. If each employee currently works 9 hours a day, how many workers are currently working in the company?
Lily wants to buy a new laptop that costs $1500. If she has $250 in savings and earns $50 per week babysitting, how many weeks does she need to work to afford the laptop?
A factory produces boxes of chocolates. Each box requires 1 cup of sugar. If the factory needs 480 cups of sugar to make 40 boxes of chocolates, how much sugar does each box require?
The school has 35 bicycles in the rack, and 15 were unlocked and 10 are still in use. How many bicycles are locked and unused?
A restaurant has a total of 300 seats, of which 200 are reserved for a large group. If the small group reserves 50 seats, how many seats are left available?
A bookstore has 240 books on shelves. If 1/4 of the books are romance novels, and 1/3 of those romance novels are about vampires, how many vampire romance novels are there in the store?
Sarah's bakery sells 250 loaves of bread a day. How many loaves of bread will Sarah's bakery sell in 15 days if on the first 5 days it only sells 200 loaves a day?
Tom's favorite recipe requires 60 apples to make. The number of apples that Tom needs is reduced by a third with each new attempt at the recipe. How many apples will Tom need for the fifth try at the recipe?
Mary's bookshelf has 30 shelves. Each shelf has 18 books on it. If Mary adds 2 more shelves and 10 more books per shelf, how many books will Mary have on her bookshelf?
There are 30 birds perched on a tree. The number of birds that land on the tree is tripled by the end of the day. If 10 birds take off from the tree at dawn the next day, how many birds are left on the tree?
Alex's garden has 50 flower beds. Of those flower beds, 80% have roses. Of those with roses, 40% also have daisies. How many flower beds have both roses and daisies?
Rachel has a collection of 42 CDs. Her friend, Jessica, has 14 more CDs than Rachel. How many CDs do they have in total?
A bicycle rental company charges $8 per hour and a $2 service fee. If John rented a bike for 5 hours, how much will he need to pay in total?
Karen went shopping and bought 5 blue shirts, 4 yellow shirts, and 7 white shirts. If she bought the same number of blue shirts as yellow shirts for the rest of her family, how many more shirts did she buy for herself than for her family?
During a week, Tom drove 240 miles, and Pam drove 40 more miles than Tom. How many miles did they drive in total?
Jerry is planning a party and needs 40 cups of juice. He has 4 large containers, each holding 8 cups. How many more cups of juice does Jerry need to buy?
Samantha has eight cats. Every year, one of her neighbors takes two cats away from her. If this happens for five years, how many cats will Samantha have left?
Out of 55 students in Mrs. Sanchez's class, 60% play chess and 30% of those chess players also play basketball. How many students play both chess and basketball?
City A is one-quarter more populated than City B. If City B has 1200000 people, calculate the total population of both cities?
Greenville has 500 more people than Hopewell. Hopewell has 3 times as many people as Winston. If Greenville has 2400 people, how many people are there in Winston?
Olivia jogs 9 miles an hour. Her sister Chantelle can jog 7 miles an hour. If they start in the same place and jog in opposite directions for 2 hours, how far apart do they end up?
Jenna can beak 45 empty boxes in a minute. She has 420 empty boxes. How much time does she take to break all of them?
Mary's bag contains 18 red balls, 15 blue balls, and 7 green balls. If 5 balls are drawn at random from the bag, how many different ways are there to get exactly 2 blue balls?
A hotel costs 250 dollars per day for 2 people. How much would it cost for 15 people for 7 days?
Melissa earns weekly allowance of 50 dollars per week. She saves 4 dollars per week. How much savings does she have after 4 months?
In 3 hours a water tank can be filled. How many minutes does it take to fill the tank?
In the city of MacDonald, there are 300 read cars and 200 blue cars. If 40 red cars turn into blue cars, how many blue cars are now in MacDonald?
Spiritual exhibits a basketball game with a scoreboard that reads 120 points. Her rival's team scored 20 points less. If Spiritual's team scored 60 points in the first half, how many points did they score in the second half?
Madeline's disk storage has 4000 bytes of free space. She installs 2 operating systems, each using 200 bytes. Then she installs 5 software applications, each using 100 bytes. How many bytes of free space does she have left?
Dominique is a talented fresco artist. She finished a fresco covering an area of 240 square meters. The fresco required 3 coats of paint, and each coat required 40 kilograms of paint. If she needs to buy paint in 20-kilogram bags, how many bags must she buy?
There are 3 machines producing identical boxes of snacks at a factory. Machine 1 produces 200 boxes in 2 hours, machine 2 produces 120 boxes in 3 hours, and machine 3 produces 300 boxes in 4 hours. If all machines produce boxes at constant rates, how many boxes do they produce per hour in total?
Ava has $40, her brother has $15 more than Ava, and her sister has $10 more than Ava's brother. If Ava gives half of her money to her brother and her sister gives half of her money to Ava, how much will Ava have at the end?
Olivia is saving up to buy a new bike that costs $120. She already has $40, and her grandma gives her $20 each week. How many weeks will Olivia have to wait until she can buy the new bike?
Delilah is three years older than her brother. If their mom is 12 years older than Delilah, and their grandma is twice as old as their mom, then how old is Delilah's grandma?
Each day, the number of customers in a store grows by 5% compared to the previous day. If there were 100 customers on Monday, how many customers will there be on Friday?
Lily is baking cookies for a school bake sale. She needs 3 cups of sugar to make 6 dozen cookies. If she wants to make 9 dozen cookies, how many cups of sugar will she need?
Sam buys 5 t-shirts at $10 each. How much money does Sam spend on buying t-shirts?
A bookshelf has 5 shelves, and each shelf can hold 8 books. How many books can the bookshelf hold in total?
Jose has saved $120. He wants to save another $80. How much money will Jose have when he reaches his goal?
Tom has collected 15 baseball cards, and his friend gives him 3 more as a gift. How many baseball cards does Tom have now?
A bakery is having a sale of 15% off all bread. If a loaf of bread originally costs $10, how much will you pay for it during the sale?
Mark can ride his bicycle 15 miles an hour. His friend Tony can ride his bicycle 12 miles an hour. If they start at the same point and ride their bicycles in straight lines in opposite directions for 2 hours, how many miles apart do they end up?
Atlanta has three-quarters as many people as Chicago. If Chicago has 800000 people, calculate the combined population of both cities?
When Tim turns 25, he will be half the age of Samantha and twice as old as Ben. Tim is 20 years old now. What is the sum of the ages of Samantha and Ben now?
In a garden of 400 roses, 50% are red roses and one-fifth of these are hybrid roses. Assuming these proportions are exactly correct, how many roses in the garden are both red and hybrid?
Sketch collects metal coins. She has 120 coins in her collection from Europe. Uncle Steve gives her 30 more coins, half as many as her mom gave her. Aunt Mary gave Sketch 6 coins, 2 less than her dad. How many metal coins does Sketch have in total, after receiving all these gifts?
In a restaurant that serves 200 burgers a day, 30% have lettuce and one third of these are veggie burgers. Assuming these proportions are exactly correct, how many veggie burgers with lettuce are served in the restaurant daily?
Emily is a high school English teacher and has 35 students in her class. Of those students, 70 percent have read To Kill a Mockingbird. Of those who have read To Kill a Mockingbird, 40% also have read The Great Gatsby. How many students have read both To Kill a Mockingbird and The Great Gatsby?
Janet bought 5 times as many bananas as her friend Patricia. If Patricia bought 12 bananas, how many bananas did they buy altogether?
A hospital has 150 beds, of which 30% are in the maternity ward. Each bed in the maternity ward is equipped with exactly 2 cribs. How many cribs are there in the maternity ward?
Sam is a skilled skateboarder and can jump 15 feet in the air on his skateboard. His friend Alex is learning to jump and can only jump 3/5 as high as Sam. How many feet in the air can Alex jump on his skateboard?
Ryan currently has 50 stickers, but he used to have more. Ryan gave his sister 40 stickers, gave his brother the same amount and gave his neighbor half the amount he currently has. How many stickers did Ryan start with?
A bakery is selling a batch of 40 freshly baked cookies. If they have three batches, how many cookies do they have in total if they decide to add 10 more cookies to their stock?
Every morning for 5 days, Rachel has a breakfast that has 200 calories. If she decides to skip breakfast for one day and then increase her daily calorie intake by 50 calories for the remaining days, how many calories will she have consumed in total at the end of the 5-day period?
Ethan bought 6 boxes of crayons with 8 crayons in each box. If he also bought individual crayons and added them to his collection, and he now has a total of 52 crayons, how many individual crayons did Ethan buy?
Sophia spent $120 buying Halloween costumes for her two cousins and herself. If each costume cost the same amount, how much did each costume cost?
Sarah has been saving to buy a new bike. She has saved $35 and expects to save $15 per week. How much will she have saved in 5 weeks to buy her new bike?
Emily is a reading teacher and needs books for the classroom. She decides to order 5 boxes of books and each box has 8 packs of books. If there are 25 books in a pack, how many books will she have for her classroom students?
David buys a coffee machine at a discount for $120. If he pays with a 20% off coupon, how much does the coffee machine originally cost?
Sophia planted a tree that grows at a rate of 3 inches per month. If the tree was 5 inches tall when she planted it, how tall will it be after 2 years?
Alex is a touring musician who earns $200 per concert. If he plays 5 concerts each month, how much will he earn in 12 months?
The total number of tickets sold for a concert is 2100. The number of tickets sold at the door is 1/6 of the total number of tickets sold online. If 300 more tickets were sold online than at the door, how many tickets were sold online?
In a bookshelf, there are 175 books with blue covers and 180 books with red covers. Three books with blue covers are placed on the top shelf, 5 with red covers and 4 with blue covers on the second shelf, and 7 with red covers and 3 with blue covers on the third shelf. What is the total number of books on the top, second, and third shelves?
In a bakery, 360 loaves of bread are produced daily. The amount of white bread produced is 2/5 of the total daily production. If the amount of whole wheat bread produced is 20 loaves more than the amount of white bread, how many loaves of whole wheat bread are produced daily?
Martin is 12 years older than his brother Michael and 4 years younger than his sister Marie. If Michael is 18 years old now, how old will Marie be when Martin is 30 years old?
There are 480 students going on a field trip. If the number of boys is 1/3 more than the number of girls, and the number of girls is 10 less than the number of students on bus A, how many boys are going on the field trip?
Olivia has a big jelly bean jar filled with jelly beans. Each week, she receives 15 new jelly beans, but she eats 10 of them. If Olivia currently has 100 jelly beans, how many jelly beans will she have in 8 weeks?
Coach Smith has been coaching basketball for 15 years. Every year, she receives a $500 bonus and her salary increases by 5%. If Coach Smith's current salary is $52,500, how much did she earn in her first year of coaching?
At the local farmers market, 1/3 of the fruits are apples, and 3/5 of these apples are red apples. If there are 210 fruits at the market, how many fruits are NOT apples?
Lucy currently has $800 in her savings account. She saves $20 per week and also receives an annual deposit of 10% of her total savings. How much money will Lucy have in her savings account in two years?
Jackson and his brother Alex are studying for an exam. Jackson has 270 flashcards and Alex has twice that amount. They decide to study half of the flashcards each day. How many more flashcards will Alex have left after three days of studying?
Alex is a math teacher. He has 50 students in his class. If one-third of them are girls, how many boys are in his class?
Daniel is working on a construction site. The building requires 3500 blocks, but they only have 2800 blocks delivered so far. What fraction of the blocks are delivered?
Rachel is a fashion designer. She wants to create 24 identical scarves. If she needs 3 meters of fabric for each scarf, how many meters of fabric does Rachel need in total?
Jack is saving money for a new bike. He has saved $120 so far, but he still needs $180 more. If he saves $10 per week, how many weeks will it take him to save the remaining amount?
Olivia is a travel agent. She has 35 clients going on a trip to Europe. If two-fifths of them are going to Paris, how many clients are going to Paris?
David gets 4 times more pocket money each week than his sister Emily. If Emily gets 12 dollars weekly, what is the total amount of pocket money David and Emily receive weekly?
Rachel has 50 more students than her colleague Thomas. If Thomas has 120 students, what is the total number of students Rachel and Thomas have?
Every year, Samantha gets 3 more pets than the previous year. If she has 10 pets now, how many pets will she have in 4 years?
When Nathan turns 18, he will be 3 times as old as Luke and half as old as Ethan. Nathan is currently 12 years old. What is the sum of Luke’s and Ethan’s age now?
A company found that 15% of the 1000 employees participate in a charity program. How many employees do NOT participate in the charity program?
In Mr. Johnson's class, there are 60 students. Of those students, 70 percent have bicycles. Of those who have bicycles, 30% also have skateboards. How many students have both bicycles and skateboards?
When Samantha turns 25, she will be one-third the age of her father and five years older than her brother. Samantha is 10 years old now. What is the sum of the ages of her father and brother now?
Emily bought five more books than Sarah. If Sarah bought 12 books, how many books did they buy altogether?
Michael is buying lunch for his friends. He decides to buy a sandwich for everyone who plays soccer and a salad for everyone who plays basketball. He gets 18 sandwiches and 22 salads. If each sandwich costs $3 and each salad costs $2, how much did he spend on lunch?
At the amusement park, a ticket for the roller coaster costs $8, a ticket for the Ferris wheel costs $6, and a ticket for the merry-go-round costs $4. How much do you need to pay for four tickets to the roller coaster, two tickets to the Ferris wheel, and three tickets to the merry-go-round?
Alex has a small venture. Every 3 hours, a truck delivers 4 boxes to her warehouse. If she has already received 12 boxes from the previous day, how many more boxes will she receive if the truck delivers at this rate for the next 9 hours?
Chris is in charge of organizing a digital library. Every 5 minutes, 3 new e-books are added to the digital library. If the library originally had 200 e-books, how many e-books will it have after 30 minutes?
Olivia bought a new gadget. The gadget uses an average of 0.2 liters of water per minute. After using the gadget for 120 minutes, how many liters of water will it have used?
Tyler is part of a school play. The school play had 20 rehearsals. In each rehearsal, Tyler practiced his lines an average of 4 times. If the school play has 5 rehearsals per week, how many times has Tyler practiced his lines?
Ethan has a collection of stamps. He has 150 stamps currently. He gets an average of 7 stamps as gifts every month. How many stamps will Ethan have after 10 months?
Samantha is a tennis player. She practices her serves 3 times a week, with 20 serves each session. If she practices for the next 12 weeks, how many serves will she have practiced in total?
The local zoo has a certain number of animals. If the zoo has 15 birds, 25 monkeys, and 5 times as many lions as monkeys, how many animals are in the zoo in total?
Christopher is saving money for a new bike. He saves an average of $8 per week. If he has already saved $120 and the bike costs $320, how many more weeks will it take him to save enough money for the bike?
Rachel has a pet rabbit. Her rabbit eats 0.5 kg of food per week. If Rachel buys a 5 kg bag of food, how many weeks will the food last?
Michael is building a bookshelf. He needs 12 screws per shelf, and the bookshelf has 8 shelves. If he has already used 24 screws, how many more screws does he need to finish the bookshelf?
A store has 80 boxes of cereal. 20% of the cereal has already been sold. Later on, 15 more boxes were added. If 10 more boxes were sold, how many boxes are left?
Rosa has a total of 210 coins, consisting of pennies and nickels. If each penny is worth 1 cent, and each nickel is worth 5 cents, and she has a total of 840 cents, how many pennies and nickels does she have?
In a garden, there are 15 flowers and 20 total plants. If the number of bushes is three times the number of flowers, how many bushes are there?
On Monday, Maria had 25 stickers on her sticker book. On Tuesday, she got 6 more stickers. On Wednesday, she gave 2 stickers to her sister. On Thursday, she got 4 more stickers. On Friday, she got an additional 12 stickers. How many stickers does Maria have now?
A cart has 100 wheels, and each wheel is attached to an axle. If 15 axles have three wheels, how many axles with four wheels does the cart have?
Helen can do 8 hours of hockey practice a week. Her friend Zoe can do 10 hours a week. If they start with the same practice hours, and they practice in opposite directions for 2 weeks, how many hours of practice do they end up having in total?
Mrs. White baked a total of 250 cupcakes. If she put 5 cupcakes in each box and gave away 5 boxes to her friends, what percentage of the cupcakes did she give away?
Jose buys a new phone for $420. He negotiated the price and received 10 percent off the original price. How much was the original price of the phone before the discount?
Daniel has 125 marbles in his collection. He bought 50 more marbles and gave away 25 to his brother. What percentage of his original marbles does he have left?
Samantha lives in a town 15 miles from the capital city. If she traveled 30 miles towards the capital city and then moved back 20 miles in the opposite direction, how many miles is she from the capital now?
A librarian has five shelves of books in a library. Each shelf has three bookcases, and each bookcase contains 12 shelves. If the librarian wants to arrange the books to fill up 2/3 of the shelves, how many books are needed?
In a certain town, 3/5 of the people are volunteers. Among these volunteers, 60% are High school students. If there are a total of 150 High school students in the town, how many people live in the town?
If Sally's garden has 20 beds of roses, and each bed has 12 roses, how many flowers are in the garden if Sally has added an extra 25 roses somewhere else in the garden?
A candy store has 250 bags of candy. 40% are sour candies and 20% of the sour candies are red candies. How many bags of red sour candy are there in the store?
If Rachel has been saving money for 12 months, and she saves $25 a month, how much money has she saved if she also received a $100 birthday gift?
Olivia has 12 balls, and she adds 5 more every week. How many balls will she have after 4 weeks?
A factory produces 300 boxes of cookies every hour, and it operates 8 hours a day. If each box weighs 0.5 kg, what is the total weight of the cookies produced in a day?
The area of a square field is 529 square meters. What is the perimeter of the square field?
Dominic has 250 stamps, and he gives away 30 every month. How many stamps will he have left after 6 months?
A bakery sells 450 loaves of bread every day, and each loaf costs $1.50. How much does the bakery earn in a day?
A coffee shop sells large and small coffee cups. A large cup holds 4 times as much as a small cup. If a small cup can hold 8 ounces of coffee, how many ounces can a large cup hold?
Lily planted three gardens. The first one has 200 flowers, the second one has 3 times as many flowers as the first one, and the third one has 2 times as many flowers as the second one. How many flowers are there in total?
Jake has 5 bags of apples, with each bag containing 8 apples. He uses 15 apples to make a pie. How many apples does Jake have left?
Ethan has been saving money for a new bike. He has saved 2/3 of the total amount needed. If the bike costs $150, how much more does he need to save?
Emma bakes cookies for her school's bake sale. She can make 3 batches of cookies with one bag of flour. If she wants to make 12 batches of cookies, how many bags of flour will she need?
Ava has 48 strawberries and she wants to share them among 8 baskets. How many strawberries will each basket contain?
Benny sells 25 kilograms of oranges at $5 per kilogram. If Benny spent $30 on transportation to the market and he gives 20% of his profit to the orange farmer, how much will Benny take home?
Carlos has 15 more boxes of chocolates than his girlfriend, Sophia. Together, they have 47 boxes of chocolates. How many boxes of chocolates does Sophia have?
Diana has 25 friends coming over for a party and she wants to serve a fruit salad. One serving of the fruit salad requires 1/3 of an apple. If Diana has 20 apples, how many servings of fruit salad can she make?
Emily has a candy shop and wants to pack candies into tubes. If she has 240 candies and wants to pack them in tubes with 8 candies each, how many tubes can she fill?
Olivia has been saving money for a new bicycle and has $145 in her piggy bank. She wants to buy a bicycle that costs $180. How much more money does Olivia need to save?
Jackson is making cookies for his classmates. If the recipe requires 2/3 of a cup of sugar for every 12 cookies, and Jackson wants to make 72 cookies, how many cups of sugar will he need?
Lily's aunt has 120 buttons in her sewing box. She gives Lily 1/5 of the buttons. How many buttons does Lily's aunt have left?
Jack's family goes on a road trip and travels 240 miles on the first day, 180 miles on the second day, and 300 miles on the third day. If they travel a total of 900 miles, how many miles will they travel on the fourth day?
Maya has 18 books on her bookshelf, and she wants to add 7 more books. If Maya's bookshelf can hold 32 books, does she have enough space for all the books?
In a music concert, 30% of the audience were children and 25% were teenagers. The adults were 120 in number. How many people were in the concert?
Sarah is working on a data entry task, in which she needs to enter data into a system for 4 hours a day. If she increases her working hours by 1 hour each day, then how many hours will she spend on the task in one week?
Justin is a basketball player. He scored an average of 15 points in a series of 8 games. In the last three games, he scored 12, 18 and 20 points respectively. What was his average score in the first five games?
Olivia bought 28 kg of wheat and 12 kg of rice. If she got a 20% discount on the wheat and a 15% discount on the rice, and each kg of wheat costs $0.5 and each kg of rice costs $0.6, how much did she pay for the wheat and rice together?
In a group of 40 students, 25 students are studying either computer science or math. If 18 students are studying computer science, how many students are studying math but not computer science?
Justin can make 40 widgets in one hour. If he works for 6 hours and breaks for 3 hours, how many widgets can he make in total?
There are 24 students in a class, and 16 students are proficient in math. If 30% more students improve their skills, how many students in total are proficient in math?
Adam has 12 books on his shelf. He gives away 25% of them to his friend and buys 4 more books. How many books does Adam have now?
A bakery sells 40 cakes in the morning and 25 more cakes in the afternoon. If each cake costs $5, how much money did the bakery make in total?
Mr. Smith can drive his car 250 miles with a full tank of gas. If his tank can hold 15 gallons of gas and gas costs $3 per gallon, how much money will he spend on gas for his round trip of 500 miles?
If Pamela has 150 books on her bookshelves and each shelf can hold 10 books, how many shelves does Pamela need to buy?
Samantha makes cookies to raise money for charity. She makes 5 batches of cookies with 12 cookies in each batch. If she sells each cookie for $2, how much money does Samantha make?
Laura is a painter who paints 30 canvases in one week. If she paints 15 canvases less than last week, how many canvases did Laura paint last week?
If Tony has 90 pencils in his desk and he loses 20 pencils, how many pencils does Tony have left to share with his friends?
Sarah has 120 stickers to give out to her classmates. If she wants to divide the stickers equally among 8 classmates, how many stickers will each classmate get?
Marcus paints porch rails. He decided to paint them with a red color. He applied 25 coats of paint and each coat needed 10 gallons of paint. If each gallon cost $27 how much did he spend on paint?
Every week of last month Teresa grew her hair. The first week, her hair was 10 inches long. Each week after that, her hair grew 2.5 inches. How long was her hair at the end of the fourth week?
Maya's sister has a strawberry farm ready for harvest. She borrows Mrs. White's tractor and transports the harvest to their store, carrying eight crates per trip, prepared for sale. If the strawberries are packed in 60 kgs crates, and the tractor makes 15 trips, what's the total weight of strawberries harvested by Maya's sister?
Jasper collects rare coins. At first, his collection consisted of 100 coins. His family, knowing his hobby, decided to give him some coins. Grandma gave Jasper three times as many coins as the aunt. Mom gave Jasper 15 coins, 3 more than Dad. Uncle gave Jasper 9 coins, 2 less than the cousin. How many coins does Jasper have in total, after receiving all these gifts?
Cabot has 2 more bicycles than his sister, Violet. If Violet has 24 bicycles, how many bicycles does Cabot have?
Winnie sells books at the bookstore. She needs to make $1200 to buy a new laptop. If she earns a commission of 20% on each book, and the books sell for $40 each, how many books will she need to sell?
Charlotte’s favorite sport is tennis. She can serve the ball at a speed of 60 miles per hour. Her friend, Julia, can serve the ball at a speed of 15 miles per hour more than Charlotte. Her brother, Alex, can serve the ball at a speed of 3 times Julia’s speed. How fast can Alex serve the ball?
Eric loves reading books. He has 36 more books in his bookshelf than his brother, Daniel. Daniel has 3 times as many books as Eric's sister, Emily. Emily has 8 books. How many books does Eric have?
The flower shop has a set of bouquets to be delivered to the hotel. Each bouquet requires 7 flowers. If there are 5 bouquets in total, and the shop has 46 flowers, will they have enough flowers to make the bouquets?
In a group of 300 volunteers, one third are engineers and one quarter are females. If 25 females are engineers, how many male engineers are there?
A company has 1000 employees. One tenth have a graduate degree and one fifth have a master's degree. If half of those with a graduate degree also have a master's degree, how many employees have either a graduate or a master's degree but not both?
Sarah has a total of 500 stickers and cards. Her collection of Harry Potter stickers and cards has 40 stickers and 10 cards and her collection of Barbie stickers and cards has 20 stickers and 30 cards. The rest are from Disney. If her Disney collection has twice as many stickers as cards, how many Disney stickers are there?
A farm has 600 animals, consisting of sheep, cows, and chickens. If there are 30 more chickens than cows, and the number of cows is half the number of sheep, how many cows are there?
In a bag of 200 buttons, 10% are red, 20% are blue and 15% are yellow. How many green buttons are there?
Having saved $2000, Maria invested it in two different accounts. One account earns a 5% annual interest rate, while the other earns an 8% annual interest rate. If she earned a total of $156 in interest for the year, how much did she invest in each account?
Rachel bought a bunch of identical bags to prepare for her trip. She filled 25 bags with 4 clothes each. However, she realized she needed 23 more bags for shoes. If she has 480 clothes and shoes in total, how many shoes did Rachel put in each bag?
In a keyboard factory, every 3 minutes, 7 keyboards are produced. How many keyboards would the factory produce in 2.5 hours?
Charlie wants to put a fence around his rectangular backyard. The backyard measures 100 meters in length and 50 meters in width. If the fence costs $10 per meter, how much will it cost Charlie to fence the entire backyard?
Andy took a bus that travels at a speed of 70 km/h for 1.5 hours. Then he took a train that travels at a speed of 120 km/h for 2 hours. How far did Andy travel in total?
A big box of chocolates contains 300 chocolates, of which 60 are dark chocolates and 20% of the dark chocolates are filled with nuts. How many chocolates in the box are both dark and have nuts?
In a small park, 10 squirrels eat nuts and exactly 20% of them are grey. If every year, five more grey squirrels are born, how many squirrels will there be in three years?
In a toy factory, 240 toys are produced daily and 20% of them are teddy bears. Of the teddy bears, one-fifth are stuffed with wheat. How many teddy bears stuffed with wheat are produced daily?
Each week, Jason's grandma bakes 12 apple pies, and exactly 25% of them are sold on Friday. If she bakes pies for 8 weeks, how many pies does she sell on Fridays?
If Libby's library has 600 books, and 15% of these books are romance novels, and one-third of these romance novels are located on the second shelf, how many romance novels are located on the second shelf?
Mark has 15 more books than Sarah. If Sarah has 21 books, how many books do they have altogether?
A pizza parlor has a special offer on a large pepperoni pizza for $15 and an additional topping for $2 each. How much do you need to pay for a large pepperoni pizza with 4 additional toppings?
In a garden, there are 18 sunflowers and 8 tulips. If we want to plant double the number of sunflowers and triple the number of tulips, how many flowers will be there in total?
Michael buys a bike for $120 and sells it for $150. How much profit does Michael make from the sale of the bike?
A pencil costs $0.50, a notebook costs $1.25, and a ruler costs $0.75. How much do you need to pay for three pencils, two notebooks, and a ruler?
Kimberley paints 8 bicycles each day. If she paints for 4 days, how many bicycles does she paint in total?
Jeff bought 2 laptops for $1,000 each, and 1 tablet for $500. How much did Jeff pay for the laptops and the tablet altogether?
For lunch Emma eats 4 sandwiches, 6 apples, and 3 bananas. How many pieces of food does Emma eat for lunch in total?
Alex is making cookies for 6 boxes. Each box should have 4 cookies each. If Alex made 24 cookies, do they have enough cookies for all the boxes?
A bookshelf has 5 shelves. Each shelf can hold 8 books. If the bookshelf is currently empty, how many books can be put on it altogether?
There are 300 students in a school. If 40 students are in each classroom, how many classrooms are there in the school?
Emma has 15 pets and each pet eats 2 pounds of food daily. If Emma buys food for 3 days, how many pounds of food does she buy?
There are 15 more chairs in the living room than in the dining room. If there are 8 chairs in the dining room, how many chairs are there in the house?
At a restaurant, fries cost $2 each and burgers cost $5 each. If you order 3 fries and 2 burgers, how much will you pay in total?
Lucy baked 35 cupcakes and packed 5 cupcakes in each box. How many boxes did Lucy fill with cupcakes?
Martin makes 15 dollars an hour as a dog walker. On the first day he worked for 8 hours, on the second day he worked for 6 hours, and on the third day he worked for half the time he worked the first day. How much money did Martin make in total for the 3 days?
Tom has 10 backpacks, and he wants to put 5 textbooks in each backpack. If he wants to put 20 textbooks in a separate box, and he has 70 textbooks in total, how many textbooks does he still need to buy?
Carlos has 50 stickers and he wants to give an equal number of stickers to each of his 5 friends. If Carlos has 3 stickers left after giving the stickers away, how many stickers did he give to each friend?
Emily can ride her bike 25 miles an hour. If she rides her bike for 4 hours and then walks half the distance she rode, how many miles does Emily travel in total?
Samantha has $500 to buy gifts for her friends. If she buys 10 gifts, each costing $25 more than the previous one, how much money does Samantha have left?
Ava has three times as many toys as her brother, and her brother has twice as many toys as her sister. If the total number of toys they have is 360, then how many toys does Ava's sister have?
Piper has a certain number of bags of flour needed for baking cakes for her friend's wedding. Each cake requires 2 cups of flour, and she has 12 bags of flour, each containing 4 cups of flour. If she wants to make an equal number of large and small cakes and a large cake requires 2 cups of flour and a small cake requires 1 cup of flour, how many large cakes can she make?
In a game, Hannah can score 40 points every game she wins and loses 10 points every game she loses. If she won 5 games and lost 2 games, how many more points would she have scored if she had won 2 more games and lost 1 less game?
At the farm, 25% of the 400 chickens lay blue eggs, and one-quarter of those chickens lay extra-large eggs. Assuming these proportions are exactly correct, how many chickens on the farm lay extra-large blue eggs?
Gracie has to eat at least three times as much cereal as her brother does every morning. If her brother eats 1.5 bowls of cereal in the morning, how many bowls of cereal do they eat in total every morning?
Elsa can finish painting a room in 4 hours, and her brother Daniel can finish painting the same room in 2 hours. If they work together, how many hours will it take them to finish painting two rooms?
Daniel's mom bought a total of 100 pounds of cheese and chocolates for her party. If she bought 15 pounds of chocolates, how many pounds of cheese did she buy?
Sandra bought a gift that cost $120. She gave the cashier a $200 bill. How much change will she get?
Mark rides his bike at an average speed of 16 miles per hour. If he rides for 2.5 hours, how many miles will he ride in total?
Jake bought a carton of eggs with 24 eggs. If he used 4 eggs to make an omelette, and another 4 eggs to make scrambled eggs, what fraction of the eggs are left?
Brenda's cookie jar holds 120 cookies. She baked 30 batches of 4 cookies in each batch. She then ate 1/4 of the baked cookies. How many cookies does she have now?
Alex spent 15% of his income on his new bicycle. If he spent $240 and his income is a third of his mother's, how much income does his mother have?
Rachel has 160 buttons in her button collection. She decides to share some buttons with her friends, Emma, Olivia, and Ava, dividing the buttons equally among them. If she gives herself the same number of buttons she gave each friend, how many buttons will she have left?
At a baseball game, a hot dog and soda cost $7.00 each. The total revenue from the sale of hot dogs and soda was $1400. If the revenue from the soda sales was $200 more than the revenue from the hot dog sales, how many hot dogs were sold?
Benny, a movie fanatic, owns 60 DVDs. He gave one-quarter of them to his friend, Tom, who then gave him twice as many DVDs as he had given him back. How many DVDs does Benny own now?
Paul collects quarters and dimes. He has 15 quarters and 21 dimes. If each quarter is worth 25 cents and each dime is worth 10 cents, how much money does Paul have in total?
Tom has 18 gallons of paint to paint a house. Each gallon covers 300 square feet. If the house has 5400 square feet, how many gallons will Tom have left over after painting the house?
A decorator has 18 boxes of different color paint. Each box has 24 cans of paint. If she needs to buy 32 more cans of one color, how many cans of paint will she have in total?
Ryan has $500 to buy a video game. The video game he wants cost $250. After buying the game, he wants to buy accessories worth $30 each. How many accessories can he buy?
A bookshelf has 12 shelves, and each shelf can hold 8 books. If the bookshelf is currently empty, how many books can be placed on it in total?
Maya built a skate ramp that is 2/3 as high as a ramp that her friend, Luke, built. If Luke's ramp is 24 feet high, how many feet high is Maya's ramp?
On their farm, Sarah and her family have 120 baskets of apples. They repackaged them in baskets containing 6 apples each. How many baskets of apples do they now have?
Rex saw a train approaching the platform. The train was traveling 45 miles per hour. If it will take 1 hour and 30 minutes to get to the city, how far away is the city from the platform?
In a toy factory, 3000 toys were produced in 5 hours. If the factory operates 8 hours a day, how many toys will be produced in one day?
The length of the garden is three-fifths as long as its width. If the width of the garden is 25 meters, what is the length of the garden?
There are 200 computers in the lab. 40% of them are not functioning. How many computers are functioning?
A farmer owns 120 acres of land. He uses 35% of his land to harvest wheat. How many acres does he use for harvesting wheat?
Larry can type 40 words per minute. His friend David can type 50 words per minute. If Larry types for 20 minutes and David types for 30 minutes, how many more words did David type than Larry?
A bakery has 480 cookies in stock. On Saturday, they sell 120 cookies and on Sunday, they sell 180 cookies. How many cookies are left on Monday?
Tom has $1250 to spend on a new TV. If he decides to buy a TV that costs $950, how much money will he have left over?
Rachel sells flowers at her stand on the street corner. She sold 120 flowers in a week, and 40 of them were roses. What percentage of flowers she sold were not roses?
Mark's favorite sport is basketball. He scored 35 points in one game and 40 points in another game. How many total points did Mark score in two games?
James's mom needs flour to bake a cake. She needs 3 cups of flour to make one cake, and she wants to make 5 cakes. If she only has 10 cups of flour, how many more cups does she need to buy?
A bookshelf has 30 books on it. 10 are biographies, 5 are fiction, and the rest are textbooks. How many textbooks are on the bookshelf?
Rachel drives a car that gets 25 miles per gallon. She drove 300 miles to and from school. How many gallons of gas did she use for the trip?
Tom has been training for a marathon for months. If he runs eight laps a day for a total of 5 days, and each lap is 2 miles, how many miles will he run in total?
Mr. Watson is planning a school dance. He wants to set up tables in the cafeteria. Each table can seat 8 people. If he sets up 12 tables and the cafeteria can seat a total of 112 people, how many people will be left standing?
In a library, there are 45 fiction books, 25 non-fiction books, and some biographies. If there are 100 books in total, how many biographies are in the library?
A company has 120 computers in total. They have 60 desktops and 40 laptops. How many tablets does the company have?
David has been teaching guitar lessons for years. If he has taught 25 students per month for the past year, and he gets paid $40 per student, how much money did he make in total?
Claire has 3 bags of chips. She plans to add 2 bags to each bag. How many bags will Claire have altogether?
Emily starts with a piggy bank with $152. She decides to save an additional $12 every week. How much will she have in the piggy bank after 8 weeks?
A doctor has 5 medical kits and in each kit, there are 10 bandages. How many bandages does the doctor have in total?
Isabella bought 10 dolls for her sister. Each doll requires 2 batteries to operate. How many batteries does Isabella need to buy?
Daniel bought 4 baskets of apples. Each basket contains 6 apples. How many apples did Daniel buy in total?
If Sherry can type 45 words per minute and she takes 3-minute breaks every hour, how many words will she type in a 7-hour workday?
Adam's 120-meter long garden is surrounded by 5-meter high walls. If each meter of wall requires 10 bricks, how many bricks will Adam need to build the walls?
The airplane is traveling from Rome to Paris, and it takes 2.5 hours to travel the 900-kilometer trip. What is the airplane's average speed in kilometers per hour?
Sharon has 480 cookies to package in boxes that hold 8 cookies each. How many boxes can she fill?
Rachel can paint a room in 6 hours, and Emily can paint the same room in 4 hours. If they work together, how many hours will it take them to paint the room?
Alicia owns a bakery that sells a mixture of cake and pastries. One batch of pastries requires 2 kilograms of sugar, and one cake requires 3 kilograms of sugar. If Alicia uses 60 kilograms of sugar to make a batch of pastries and cakes, how many kilograms of sugar are used for cakes?
Chris is saving money for a trip to Hawaii. If he needs $1,500 and has been saving $50 per week for 20 weeks, how much money does he still need to save?
Olivia has a collection of toy cars and toy trucks. If she has 35 toy cars and 25 toy trucks, and she wants to display them in rows with the same number of toys in each row, what is the greatest number of toys she can put in each row?
Ethan earns a weekly allowance of $15 and an additional $5 for every chore he completes. If last week he completed 8 chores, how much money did he earn last week?
At a bookstore, there are 800 fiction books on the shelves. If 400 of them are also best sellers and 300 are paperbacks, how many fiction books are paperbacks but not best sellers?
Oliver makes candles and estimates he needs four times as much wax as he has currently. If he needs to make 50 candles for an order, and each uses 0.1 kg of wax, how many kilograms of wax does he need to buy?
Edward helps his sister who makes toys for kids. One toy requires two wooden sticks, each 0.5 meters long. She has a wooden board 3 meters long. How many toys can she make from this board?
There are three types of candies in a jar, weighing 200, 150, and 180 grams respectively. The jar is filled with one type of candy. If 3 candies are taken out, and the remaining candies weigh 470 grams, what type of candy was in the jar?
Jenny has a rectangular garden that is 15 meters long and 6 meters wide. She decides to extend the length and width equally by x meters. If the garden's new area is 144 square meters, what is the value of x?
Sarah can hold up to 6 bags of groceries. Each bag can hold 5 bottles of milk, or 2 boxes of cereal, or 3 containers of yogurt. If she bought 45 bottles of milk, 15 boxes of cereal, and 12 containers of yogurt, how many trips will she make to the car?
Samantha drove from California to Arizona. If the total distance of the trip was 870 miles and she drove 3 hours faster than normal. Normally she drives 60 miles per hour, how many hours did she actually drive?
Out of a group of 60 seniors, 40 are taking biology, 30 are taking chemistry, and 20 are taking physics. If 5 students are taking all three classes, and 15 students are taking biology and chemistry, how many students are taking exactly two classes?
Emma has a piggy bank where she saves her money. She has a ratio of one part silver coins to five parts gold coins. She wants to add 200 silver coins to her bank. How many gold coins does she have currently?
Anthony can fit 15 boxes in his car. Each box can hold 12 cans of soda. If he wants to transport 600 cans of soda, how many trips will he need to make?
If each bookshelf can hold 8 books, and 2/3 of them are filled with books. If there are 24 bookshelves, how many books are in total?
A bookstore buys 50 boxes of paperback books at 20 books per box. How many books will they have in total?
Jake and his brother are building a Lego castle. They need 8 bags of Lego bricks, each containing 25 bricks. Jake has 7 bags with 20 bricks in each bag. How many more Lego bricks do they need?
Of the 500 students attending a high school, 65 are members of the school band, and 155 are members of the school choir. How many students are not members of either group?
The Johnsons want to spend their vacation on a cruise ship. The ship charges $2,500 for an interior room, $4,000 for an oceanview room, and $8,000 for a luxury suite. If the Johnsons have $10,000, how much money will they have left after booking a luxury suite?
The average salary of eight people in a company is $40,000. If the salaries of the seven other employees ranged from $25,000 to $55,000, what is the salary of the highest-paid employee?
Taking 2 weeks off, Ashley has 4 weeks of vacation left. How many weeks of vacation does Ashley get in a year?
Samantha has $42 and her brother has 3 times as much. How much will her brother have if Samantha gives him $5?
Ashley will have a total of 150 guests at her wedding reception. Each table can fit 5 guests. How many tables will Ashley need to accommodate all of her guests?
Paula has 3 times as many books as Jane and Jane has 5 fewer books than Tim. If Paula has 18 books, how many books does Tim have?
Mark will be mowing 5 lawns each day for a total of 4 days. If he earns $10 per lawn, how much money will Mark have earned by the end of the 4th day?
In a toy factory, boxes of toy blocks are packed into larger crates. Each box contains 5 packs, each pack has 20 toy blocks and there are 12 crates. How many toy blocks are there in total?
Olivia is planning a party with 20 guests. She wants to make cookies that require 1/4 cup of sugar per cookie, and each guest eats 3 cookies. If Olivia has 4 cups of sugar, does she have enough for the party?
Jasper has a rectangular garden with 15 meters of fencing. If the garden is 3 meters wide, what is the length of the garden?
In the school of 800 students, 60% are girls and the remainder are boys. If all the students are going to attend a concert, how many boys will attend the concert?
Elliot is helping his uncle fix a pipeline. Elliot's uncle gives him a pipe that is 18 meters long and asks him to cut it into 2 parts with a ratio of 3:5. What is the length of the shorter part of the pipe?
Sophia has to prepare 40 gift bags for a party. She can put 5 bags in a box. How many boxes does she need?
Riley has a bookshelf of 36 inches with five shelves, each 2 inches apart. If Riley puts a 2-inch book on the shelf at the bottom and a 5-inch book on the top, how many inches are left on the shelf?
A photograph costs 15 dollars. A frame costs 20 dollars. If Samantha wants to frame 6 photographs, how much does she need to pay in total?
There are 5 dogs playing in a park. Every dog has 3 balls. If 2 dogs come with 4 balls each, how many balls are there in the park?
Mark can pave a path of 4 meters in 2 hours. If he works at the same speed, how many hours will it take him to pave a path of 12 meters?
Olivia reads 15 pages a day and has 450 pages left in her book. How many days does it take to finish her book?
A local chartered accountant has $1200 in his account and each client pays him $80. How many clients can he pay all his expenses?
Rachel can solve 12 puzzles an hour and her brother can solve 8 puzzles an hour. If they can start at the same time and work for 5 hours, how many puzzles do they solve together?
Luis has $1000 and spends 20% on clothing. Then he spends $120 on a watch. How much money is left with Luis?
In a garden, there are 18 rows of 14 rose bushes each. If 30% of the bushes are red, how many red rose bushes are in the garden?
In a factory, there are 300 workers and 12% of them are on the night shift. How many workers are on the day shift?
In a zoo, there are 50 animals in the North area. The zookeeper transfers 7 of them to the South area. If the South area already has 12 animals, how many animals does the South area have now?
Mark can swim 10 laps in 25 minutes. If he swims at the same pace, how long will it take him to swim 16 laps?
Sarah has 18 buttons in her sewing kit. She wants to divide them equally among 3 of her friends. How many buttons will each friend get?
A basketball player scored an average of 12 points per game in 5 games. If he scores 18 points in the next game, what will be his average score per game?
By the end of the month, the School Book Club read 5 more books than they did the month before. If they read 18 books the previous month, how many books have they read in total this month?
To organize his bookshelf, Ethan grouped his books by their authors. He discovered that he has 10 more books written by female authors than by male authors. If he owns 28 books written by male authors, how many books does he own altogether?
David and his friends consumed 240 cookies in 4 days of camping. If they eat 20 cookies more each day, how many cookies will they consume on the fifth day of camping?
When Henry turns 50, he will be 10 years older than James and 5 years older than Ken. Henry is 23 years old now. What is the sum of the ages of James and Ken now?
For a school play, Samantha needs to decorate 30 chairs equally with balloons. If she uses 5 balloons on each chair, how many balloons will Samantha need to buy in total?
Sophia has 250 cups of flour in her pantry. On Monday, she uses 10 cups to make cookies. On Wednesday, she uses 25 cups to make a cake. On Friday, she buys 30 cups of flour. How many cups of flour does Sophia have on Saturday?
David, Mark, and James want to share 24 cookies. If they divide the cookies equally and Mark eats 2 more cookies than his share, how many cookies did James get?
When Sean turns 40, he will be three times as old as his daughter Samantha. Sean is 24 years old now. What is the age of Samantha five years from now?
A bat is flying 12 miles an hour towards a wind that is blowing 5 miles an hour. If the bat is flying towards a tree that is 60 miles away, how many hours will it take for the bat to reach the tree?
Sam needs to paint 240 windows. He paints 30 windows per day. If he takes 4 days off in a week, how many weeks will it take Sam to paint all the windows?
The new bakery, Sugarland, baked 5 times as many croissants as they baked pretzels yesterday. If they baked 250 pretzels, how many croissants did the bakery bake yesterday?
If every 5 minutes, a car travels 30 kilometers, how far will it travel in 1 hour?
Tom has 450 stamps in his collection. He wants to put them into a new album which can hold 30 stamps per page. How many pages can Tom fill with his stamps?
Mandy can type 300 words in 10 minutes. If she types at the same rate, how many words can she type in 30 minutes?
A group of friends went on a trip to the mountains. If they drove for 3 hours at a speed of 40 km per hour, how far did they travel?
Jamie went to the park to ride a bike and she traveled 34 miles in 4 hours. If she continued to ride the bike at the same speed, how far would she have traveled in 6 hours?
Tom is planning to build a rectangular deck that has a width of 15 feet. If the perimeter of the deck is 72 feet, what is the length of the deck?
A bookshelf has 12 shelves, and each shelf can hold 8 boxes of books. If the bookshelf is currently empty, how many boxes of books can be placed on it in total?
Rachel has been saving up money to buy a new bike that costs $240. If she has been saving up $4 each day, how many days will it take her to have enough money to buy the bike?
Sam wants to invite his friends to his birthday party and he wants to divide the 48 cookies equally among them. If he invites 8 friends, how many cookies will each of them get?
A local bakery has a special sale on their famous fruitcake for the holiday season. The bakery makes a profit of $2.50 on every cake sold. If they sold 135 cakes, how much is their total profit in dollars?
A snail is at the bottom of a 20-foot well. Each day, it climbs up 3 feet, but at night, it slips back 2 feet. How many days will it take for the snail to reach the top of the well?
A group of friends want to share some candy equally. If they have 48 pieces of candy and there are 8 friends, how many pieces of candy will each friend get?
A store has 150 pairs of shoes on sale. On the first day, they sell 20% of the shoes. On the second day, they sell 25% of the remaining shoes. How many shoes are left after the second day?
Tom has $120 to spend on new school supplies. He buys a backpack for $30, a lunchbox for $15, and a set of pens for $10. How much money does Tom have left for other supplies?
Susan has a ratio of one sweater for every five shirts. She has two bags of shirts and in each bag there are 4 sets of 5 shirts. If she lost one sweater, how many sweaters does she have now?
The town of Delphi has 500 more people than Silverton. Silverton has 3 times as many people as Brandon. If Delphi has 1000 people, how many people are there in Brandon?
Samantha has 12 marbles. Every year, she loses two and buys four more. How many marbles will Samantha have in six years?
Logan is a gardener and has agreed to water some plants for his friend's party. The only water he has limited stock of is fertilizer so he counts how many bottles he needs. Each bottle of fertilizer will hold enough fertilizer for 4 plants. Logan decides to bring 8 bottles of fertilizer, each of which holds 3 bottles of fertilizer, and this will be the exact amount he needs for all the plants. Ho…
Cate is trying to raise money for a charity. She is selling stickers for $3. She is also selling posters for $5. She wants to raise $500. She only had 10 posters that she sold out. How many stickers does Cate need to sell to reach her goal?
The museum has a collection of 12,000 ancient coins. Some of the coins are Greek, while others are Roman. 50% of the Greek coins are gold, and 30% of the Roman coins are gold. 25% of the coins are gold in total. What percentage of the coins are Greek?
Tom owns a bakery and sells 250 loaves of bread daily. The profit from each loaf is $0.50. If Tom wants to increase his daily profit by 150 dollars, how many more loaves does he need to sell?
180 apples are divided into baskets containing 6 apples each. If each basket is shared among 5 people, how many apples will each person get?
Luke is 3 times older than his daughter. After 12 years, Luke will be twice as old as his daughter. What is Luke's current age?
A container has 2400 pounds of grapes. The shipping company wants to pack the grapes in crates of 48 pounds each. How many crates can be filled?
Olivia can run 12 miles in one hour. How many miles can Olivia run in 3 hours?
For the past 7 days, Mr. Thompson has been reading a book on his lunch break. He read 28 pages on Monday, 24 pages on Tuesday, 32 pages on Wednesday, 36 pages on Thursday, 40 pages on Friday, and 44 pages on Saturday. How many pages did he read on Sunday if he read 4 more pages each day than the day before?
Lucy has 5 boxes of crayons. Each box holds 24 crayons. How many crayons does Lucy have in total if 4 crayons are missing from one of the boxes?
Mark's mom baked a cake for his birthday that contained 60 candles. 12 candles were blue, 8 candles were red, and the rest were white. How many white candles were on the cake?
Mina started the week with 50 stickers. On Monday, she received 5 more stickers as a gift. On Tuesday, she gave 2 stickers to her sister. On Wednesday, she earned 10 stickers for completing her homework. On Thursday, she lost 7 stickers while playing with her friends. How many stickers does Mina have now?
The bookshelf in the library has 5 times as many fiction books as non-fiction books. If there are 80 fiction books, how many non-fiction books are there?
To get the best deal on a new laptop, Sam needs to spend at least 3 times as much as his friend Emma did on her computer. If Emma spent $800, how much does Sam need to spend in total?
Alex is trying to collect enough stamps to fill his stamp book. He needs 20 more stamps to complete the book. He has 3 stamp books, and each book needs the same number of stamps. If he already has 50 stamps, how many stamps does Alex need to find in total?
Ava can ride her bike 12 miles in 2 hours. Her brother Julian can ride his bike 15 miles in 3 hours. If they start in the same place and ride their bikes in straight lines in opposite directions, how many miles apart do they end up after 4 hours?
James has 30 stickers in his collection. He can buy another 5 stickers every week. How many stickers will James have in 12 weeks?
A company has 80 computers in the office. If the company orders 25 more computers, how many more computers will the company need to order if they want to have a total of 130 computers?
Sarah wants to buy a bike that costs $120. She earns $5 from walking her neighbor's dog every day. How many days will it take for Sarah to earn enough money to buy the bike?
Tim loves to play a game and can play for 3 hours every day. If the school is open for 180 days every year, how many hours will Tim play his game in one year?
Olivia has 30 pictures to color. She can color 4 pictures every hour. How many hours will it take Olivia to finish coloring all the pictures?
John's sister works in a manufacturer of canned goods. The year-end report indicates 80000 cans sold. If each can is sold for 2/3 of a pound, what's the total weight in pounds of canned goods sold last year?
What's the number of installations required to put up a solar panel on every residential roof in Cityville if 1 out of 8 buildings do not have roofs and Cityville has 1650 buildings in total?
Tony's school spends $2400 a year for new computers. Last year, the school purchased 16 computers at $150 each. How much of the budget remains?
Mary's mom irons 4 more than half of the total number of shirts in the laundry basket which has 18 shirts inside. How many shirts does Mary's mom iron?
A library is planning to have 15 boxes of books for its annual book drive. They could put 24 hardcover books or 36 paperback books in a box. If they already gathered 12 paperback and 18 hardcover books, how much more books are needed for the drive?
Pablo has in his collection five times more books than his friend Jane has in her collection. If Jane has 75 books, how many books does Pablo have?
A farmer sells eggs, apples, and oranges. Each dozen eggs costs $2, each apple costs $0.50, and each orange costs $0.60. How much does he earn if he sells 30 dozen eggs, 250 apples, and 300 oranges?
Maria runs 7 miles in the morning and 3 more miles than what she ran in the morning in the afternoon. If she runs 2 miles less than yesterday, how many miles did she run yesterday?
Lindsay is twice as old as her brother Chris. If Lindsay is 10 years older than their cousin, who is the same age as Chris, then how old is Lindsay?
Larry invested $500 in stocks and bonds. If he invested twice as much in stocks than in bonds, how much did he invest in bonds?
Emma has 12 photographs and takes 2 more each week. How many photographs will she have after 8 weeks?
Tom will take 7 day off from school for the holidays. If during these holidays, he plans to spend 3 hours in playing video games daily, how many hours will he spend playing video games during these holidays?
Emily is 5 years older than her sister, and her sister is 3 years younger than her brother. If the sum of their ages is 36 years, then how many years old is Emily's brother?
At the gym, Alex can lift 20 kg dumbbells for 5 reps every day. If he wants to increase his reps by 10, how many reps does Alex want to do every day?
Rachel sells 35 toys for $8 each. The production cost is $250. How much does she make in profit?
At the school's science fair, 20 students brought their science projects. Of these, 1/4 were about biology and 1/3 of these projects were on plant biology. How many projects were about plant biology?
Mark has a total of $120 in his bank account. He takes out $20 every week for 8 weeks. How much is left in his account?
A bookshelf has 5 shelves with 7 books on each shelf. How many books are on the bookshelf in total?
In a candy bag, there are 24 red candies, 18 yellow candies, and 21 blue candies. How many candies are in the bag in total?
George needs 2 cups of sugar for a cake recipe. He has an 1/8 cup measuring cup and a 1/4 cup measuring cup. How many times will he need to fill the measuring cups to get the needed sugar?
Carmen is reading a 200-page book. She reads 25 pages in the morning and 15 pages in the evening. How many pages will she need to read to finish the book in 7 days?
Alexis can paint 6 rooms a day. She begins painting a house at 10 a.m. and finishes painting at 4 p.m. If each room requires 45 minutes of painting, how many rooms did she paint that day?
There are 36 students in a class. If 24 students are going on a field trip, how many students will stay in the classroom?
Carlos buys 12 bags of apples. Each bag contains 5 apples. If he decides to eat 2 apples, how many apples are left?
Emilia is saving money for her birthday party. She has $350 in her piggy bank. Her mom promises to give her $50 for every A she gets on her report card. If Emilia has 5 As on her report card, how much money will she have in total for her party?
Tim wants to save money for his birthday party. He has 50 dollars now and plans to save 5 additional dollars each week. How much money will Tim have after 5 weeks?
Sarah can type 40 words per minute. How many words can she type in 15 minutes?
David has 18 pencils in his bag. He then loses 4 pencils in the park and gives 5 pencils to his sister. If he then buys 8 new pencils, how many pencils does David have?
Alex wants to make 20 sandwiches for a picnic. Each sandwich needs 2 tomato slices. If Alex has 40 tomato slices, how many slices will be left after making all the sandwiches?
May has 120 stickers in her collection. She gives 20 stickers to her brother and 30 stickers to her friend. If she then buys 40 more stickers, how many stickers does May have now?
Emily has 60 stickers, but she used to have more. Emily gave her friend 30 stickers, gave her brother twice that amount and gave her sister three times the amount she currently has. How many stickers did Emily start with?
The city of Boston has 2000 more people than Denver. Denver has 3 times as many people as Fayetteville. If Boston has 4000 people, how many people are there in Fayetteville?
In Mrs. White's history class there are 50 students. Of those students, 70 percent have visited museums. Of those who have visited museums, 30% also visited monuments. How many students have visited both museums and monuments?
Olivia has three dolls. Every year, her aunt buy her three more, but two of them break. How many dolls will she have in six years?
Mr. Green buys video games. He decides to buy them for people who attended his party. He bought 12 for those who came in the morning and 20 for those who came in the afternoon. If each game cost $5 how much did he spend on games?
Katie buys new shoes. She finds a store with them on sale for $50 each. She goes to the store with $180 in her pocket. How much money will she have left after buying 3 pairs of shoes?
In 4 years, Linda will be 3 times as old as her daughter. In 10 years, Linda will be twice as old as her daughter. How old is Linda's daughter now?
Olivia starts a piggy bank and adds to it her allowance of $10 a week for 8 weeks. After that she finds $25 at the playground and adds it to the piggy bank. After another 4 weeks of allowance, she finds $5 on the sidewalk and adds it to the piggy bank. How much money does Olivia have in her piggy bank now?
A bookshelf has 12 shelves. Each shelf has 15 books on it except for the bottom shelf which has 3 times that number. How many books are on the bookshelf?
In a classroom there are 30 students. If 15 of them are boys and 1/3 of them take Spanish, how many boys take Spanish?
Abe is able to solve five puzzles in an hour. How many puzzles will Abe solve in seven hours if he takes a 30-minute break every two hours?
Brenda has five friends who study law, and two more who are studying medicine. If the number of friends who are studying medicine is tripled, how many friends does Brenda have in total?
3 books weigh 9 kilograms. How many kilograms will 12 books weigh if each book gains 0.5 kilograms during the shipment?
David's family members are going to visit him, and he is preparing the guest room. If David's parents arrive, and each of them will bring 2 guests, how many people will be in the guest room if David's parents do not stay in the room?
Carla can type 25 pages in 5 hours. How many more pages will Carla type in an additional 3 hours if her speed is increased by 5 pages per hour?
Mike can type 7 words a minute. His sister Lily can type 12 words a minute. If they start typing in the same place and type in opposite directions for 2 hours, how many words apart do they end up?
David sells 30 candles for $12 each. The candles cost $80. How much does he make in profit?
When Emily turns 25, she will be a third the age of her mother and twice as old as her brother. Emily is 10 years old now. What is the sum of the ages of her mother and brother now?
Sarah has four rabbits. Every year, her parents buy her three more rabbits, but one of them dies. How many rabbits will she have in seven years?
Nick is studying mathematics, for 4 hours a day. He decided to increase his study time, spent on mathematics weekly, by 5 hours. How much time does Nick want to spend during one week on studying mathematics?
Tyler sells 50 boxes of chocolate for $5 each. He spent $200 on fixing the van. How much profit does he make?
Anna is working at the museum. She is part of a big project, which involves 100 curators in total. One-third of them are from Africa and one-tenth are from Asia. The rest are from Europe. How many curators in this project are from Europe?
A survey conducted by the city showed that 15% of the 1200 residents agree to build a new highway. How many residents disagree with building a new highway?
Swimming for 3 hours, Nadia loses 40 calories every hour. How many more calories would she have lost if she would have swum for six hours?
Brewing 300 cups of coffee, John needs 2 beans for each cup. If he has 600 beans, how many more beans does he need to buy to have enough for another 300 cups?
Julia has 5 boxes of crayons with 16 crayons in each box. If she lends 20 crayons to her friend, how many are left?
Certain bacteria grow at a rate of 2% every hour. How many percent will they grow in 12 hours?
Olivia owns 20 pairs of socks. If she throws 4 pairs away and buys 8 new pairs, how many pairs does she have left?
A bike travels 200 km in 5 hours. How many kilometers would it travel in 9 hours?
Tom's pizza has 12 slices, and he decides to share them with his friends. If each friend takes 2 slices, how many slices are left if Tom has 5 friends?
Emily has three times as many books in her reading room as Noah has in his library. If Noah has 240 books, calculate the number of books in Emily's reading room?
A painting company has 35 boxes of paint in storage. Each box contains 4 gallons of paint. How many gallons of paint does the company have in total?
There are 120 students in the 4th grade. 40 students are participating in the school play, while the remaining are studying for their math test. What fraction of students are studying for their math test?
A school bus is transporting students to a field trip. The bus has 7 rows of seats, with 10 seats in each row. If each seat can accommodate 2 students, what is the maximum number of students that can be transported by the bus?
Asher invested 1500 dollars in a savings account. His account earns 5% interest per year. If he leaves the money in the account for 5 years, how much money will he have in the account at the end of the 5th year?
A bookstore in Miami sells 12 books an hour. If the store opens at 9 AM and closes at 5 PM, how many books are sold in total that day?
Sophia has 8 more friends than Olivia. If Sophia has 24 friends, how many friends do they have altogether?
In a test, Alex got 15 more marks than Sam. If the total marks in the test are 150, what percentage of marks did Sam get?
San Francisco has 5000 more people than Calgary. If San Francisco has 3 times as many people as Calgary, how many people live in Calgary?
A factory produces 400 more laptops a week than desktops. If the factory produces 1200 laptops a week, how many computers do they produce in total in a week?
Sarah scores an average of 100 in her math tests, but in the last test, her average drops 20% due to a mistake. How many math tests has she taken if she now has an average of 96?
In a giant game of hopscotch, Rachel puts 15 flags in each of her 10 courts. She notices that half of the flags have been knocked over. What percentage of flags are still upright?
Mr. Que made a rectangular garden with a length of 12 feet longer than its width. He put a footpath of uniform width around the garden that covers one-fifth of the area. What is the width of the footpath?
120 students are divided into groups of 4 to play soccer. If each student is given 2 water bottles to drink during the game, what is the total number of water bottles needed?
Jocelyn's age is 12 years more than the difference between her sister's and brother's age. Her sister is 14 years older and her brother is 8 years younger than her sister. What is Jocelyn's age?
Sarah scored an average of 78 points in her first five mathematics quizzes. Her scores increased by 3 points for each successive quizzes. How many points did she score in her tenth quiz?
If an airplane travels 1200 miles in 5 hours, how many miles will it travel in 8 hours if it maintains the same speed?
Mary is organizing a party for her friends. She wants to give each guest 3 mini chocolates and 2 mini cupcakes. If there are 24 guests expected, how many mini chocolates and cupcakes will Mary need to prepare in total?
James has 120 pounds of apples to be sold. He sold 20% of them on the first day, then 15% of the remaining apples on the second day. How many pounds of apples are left?
Emily bought 5 bags of candies at $2 each. She then returned 2 of the bags because they were stale. How much refund will Emily get from the store?
Tony has two fish. Every year, his parents buy him two more, but one of them dies. How many fish will he have in five years?
Alex has three books. Every month, she buys two more, but she donates one to the library. How many books will she have in eight months?
Benny currently has 25 stickers, but he used to have more. Benny gave his brother 40 stickers, gave his sister twice that amount and gave his friend Emma four times the amount he currently has. How many stickers did Benny start with?
To get his fill of bananas, Monkey has to eat at least three times as many bananas as Gorilla does. If Gorilla eats 150 bananas, how many bananas do they eat altogether?
The city of Paris has 800 more people than Rome. Rome has 3 times as many people as Madrid. If Paris has 2400 people, how many people are there in Madrid?
Sofia is three times the age of her niece, and Sofia's niece is three times the age of Sofia's cousin. If the sum of the ages of Sofia, her niece, and her cousin is 210 years, then how many years old is Sofia's cousin?
A farmer has 2000 square feet of land to plant corn, wheat and barley. He can fit 8 rows of corn, 12 rows of wheat and 15 rows of barley. If a row of corn uses 120 square feet, a row of wheat uses 100 square feet and a row of barley uses 80 square feet, what is the total area taken up by all the crops?
A company makes 18 different types of batteries. The majority of them are designed for car use and make up 60% of the total batteries produced. Another 20% are designed for laptop use and 10% are designed for mobile phone use. The remainder are designed for camera use. If the company produced 360 batteries, how many batteries are designed for camera use?
At a local farm, 300 bales of hay were produced. Of these, 120 bales were sold to a nearby stable. Another 40 bales were sold to a horse owner. 60 more bales were donated to a local animal shelter. The remaining bales were sold to a nearby farm. If each bale cost $10, how much revenue did the farm make in total?
Leo has 500 dollars to spend on a new bike and accessories. He buys a new bike for 200 dollars and a backpack for 30 dollars. He buys twice as many water bottles as he does helmets, and he buys three times as many helmets as he does bikes. If he buys each helmet for 40 dollars and each water bottle for 10 dollars, how much money does he have left to spend?
A water tank can hold 24000 gallons of water. In the morning, it is filled to 30% capacity. In the afternoon, it is filled another 40% capacity. Throughout the day, 3000 gallons of water are used. What percentage of the tank is full at the end of the day?
David spent 3 hours more than Mark in the gym. If Mark spent 4 hours, how many hours did they spend altogether?
If a book costs $12 and a toy car costs $5, how much do you need to pay for six books and four toy cars?
Tom has 25 pennies, 10 cents more than his brother. How many coins do they have altogether?
If 5 kilograms of apples cost $8, and 3 kilograms of bananas cost $5, how much will you pay for 15 kilograms of apples and 9 kilograms of bananas?
Sarah has 16 buttons, 8 buttons more than her sister. If they share them equally, how many buttons will each get?
Stubby the hamster has to run at least twice as fast as Speedy the rabbit. If Speedy runs at 10 miles per hour, how fast are they running altogether?
Last month, 20% of the people who attended the music concert attended the comedy show. If 300 people attended the comedy show, how many people attended the music concert?
Each apple tree produces two-third as much apple as the pear tree. If the pear tree produces 1500 apples, what is the total production of apples from both trees?
Noah can pack two boxes every 5 minutes, and Jackson packs 4 times as fast as Noah. How many boxes will they pack in 15 minutes?
In a bag of chips, 15% are barbecue flavored. If there are 75 barbecue flavored chips, what percentage of the chips are plain flavored if the bag contains 300 chips?
The manager of a hotel has 300 rooms. He noticed that 75 of them have a balcony and the remaining rooms do not have a balcony. What percentage of the rooms have a balcony?
Alice has 16 ounces of chocolate to make candies. She decides to divide the chocolate into portions of 2 ounces each. How many portions of chocolate candies will she be able to make?
Scott’s water tank can hold 120 gallons of water. He starts filling the tank at 8am. At 10am, the tank is 3/4 full. How many gallons of water were poured into the tank between 8am and 10am?
The ratio of yellow marbles to blue marbles in a jar is 3:5. If there are 21 yellow marbles in the jar, how many blue marbles are in the jar?
Emily’s grandmother gave her 48 cookies to store in her cookie jar. She put 1/3 of the cookies in a small container and the rest in the jar. How many cookies are in the cookie jar now?
A company recorded 15% more sales this month than last month, when it recorded $200,000 in sales. How much did the company record in sales this month?
When baking a cake, Rachel uses 2 cups of sugar for every 3 cups of flour. If Rachel used 12 cups of sugar, how many cups of flour did she use?
70% of students in a school attended the football game last week. If 280 students attended, what is the total number of students in the school?
Aaron walks 12 miles in 3 hours. At this rate, how many miles will he walk in 9 hours?
Emily borrowed $100 from her parents and agreed to pay 5% interest per month. How much will she owe her parents after 6 months if she doesn't make any payments?
Kayla has a yummy candy collection. If she already has 20 candies, received 10 more from her grandma, and her sister took 5 candies from her, how many candies does Kayla have now?
Olivia needs to paint her room, The room has four walls, each needing 2 buckets of paint. If she already has 3 buckets, and her mom gave her 5 buckets, does she have enough paint to finish painting the room?
Jack started a piggy bank, and his parents promised to add 5 dollars each month for a year. If Jack already has 20 dollars, and he takes 5 dollars out for toys, how much money will he have at the end of the year?
Benny has a small collection of model airplanes, 15 of them are red, 10 are blue, and 5 are green. If he receives 20 more airplanes, 4 times as many as the green ones, and 10 less blue airplanes, how many airplanes does Benny have now?
Ava has many friends, and she wants to share her cookies with them. Ava has 50 cookies, but she wants to save 15 for herself. If she gives 3 cookies to Emma, 5 to Isabella, and twice as many cookies to Sofia as she did to Isabella, how many cookies does Ava have left?
Christine has a huge collection of pencils. She packs pencils of similar types together in smaller sets of 5 to be given as gifts. If she has 100 pencils in total, how many gifts can she make?
Anya uses watercolor paints to create vibrant landscapes. If she needs a mixture of 3 parts blue to 5 parts green, and she has 210 ounces of green paint, how many ounces of blue paint will she need to have exactly enough to paint all her canvases?
Albert has a big stack of comic books. He lends 1/4 of them to his friend. If Albert is left with 27 books, how many did he originally have?
Alex is creating a recipe for muffins and needs a ratio of 2 cups of flour to 3 cups of sugar. If she wants to make a batch requiring 18 cups of sugar, how many cups of flour will she need?
Julia trains for a marathon. She runs 4 miles on Monday, 2 miles on Tuesday, and 1 mile on Wednesday. On Thursday she runs twice the miles she ran on Wednesday, and on Friday she runs 50% more than the miles on Thursday. How many miles will Julia have run in total by Friday?
Lucy has a basket of oranges. She initially had 50 oranges. Then she gave 15 to her sister and 25 to her brother. Now she buys 10 more oranges. How many oranges does she have now?
Jason has 40 stickers. He gives 5 stickers to his friend and then buys 10 more. How many stickers do Jason and his friend have in total?
Alice is 15 years old. In 10 years she will be three times older than her 5-year-old brother. What will be her brother's age in 10 years?
There are 120 students in a class. One-fourth of them are girls. If 15 girls left, how many students are there in the class now?
Sarah and Alex are playing a card game. Sarah wins 5 cards and Alex wins 7 cards. Before the game, Alex had 21 cards more than Sarah. How many cards did Sarah have before the game started?
Jaden is helping his dad to paint their house. They need 250 liters of paint to finish the job. They have 80 liters of green paint and they need 50% more white paint than green paint to cover the whole house evenly. How many liters of white paint do they need?
Olga bought a lot of oranges, and she put them into boxes of 12. She had 3 boxes left with 7 oranges in each. How many oranges did she have originally?
California has 1.5 times the population of New York City. If the population of New York City is 8.4 million, what is the population of California?
David is 3 times older than his sister Kim. Kim's age is also 15 less than David's son, Daniel. If the sum of the ages of David, Kim, and Daniel is 135, how old is Daniel?
Sarah is selling books at a bookstore. She needs to make $5000 to buy a new bike. Hardcover books cost $20 each and paperback books cost $5 each. She sold out 150 hardcover books. How many paperback books does Sarah need to sell to reach her goal?
David's bakery produces boxes of cookies for the holiday season. Each box contains 15 cookies, and he produces 60 boxes on the first day. If he doubles his production the following day, how many cookies did he produce on the second day?
Tom has three candles originally, each having 18 inches in height. After 3 days, the candles each have 1/3 of their original height remaining. How many total inches of candle height have been lost?
In a swimming competition, the ratio of boys to girls is 3:4. If there are 24 more girls than boys, how many competitors are there in total?
Alex planned to set up a new aquarium. He bought 8 bags of gravel with 12 pounds of gravel in each bag. If he needs 120 pounds of gravel, did he buy enough gravel, or how much more does he need?
Oliver issued 45 invitations for his birthday party, and 2/3 of the invitees responded positively, each bringing two gifts. How many gifts did Oliver get in total?
Samantha can make 12 dolls per day, while her sister Emma can make 18 dolls a day. Who can make 9 dolls more in 5 days?
At first, Miguel had 3 marbles and 2 balls. He won 21 marbles in a game. Then, his mom gave him 9 marbles and his friend gave him 10 marbles. How many marbles does Miguel have now?
A bookshelf has 30 books, with 6 red books and 8 blue books. What percentage of the books are neither red nor blue?
Tom had $40 to spend on a gift. He bought a toy for $20 and a book for $8. Then, he used$4 to buy stickers. How much money has Tom left?
At the start of a new year, Olivia had 30 journals and she decided to purchase 12 more every year. How many journals will Olivia have after 7 years?
Addison has three green pens. Every year, her mother buys her one more, but she gives one away to her sister. How many green pens will Addison have in ten years?
Sylvia's uncle has a chicken farm ready for harvest. He borrows Mr. Baker's van and transports the harvest to their store, carrying eight boxes per trip, prepared for sale. If the chickens are in boxes of 25, and the van makes 15 trips, what's the total number of chickens harvested by Sylvia's uncle?
Riley currently has 20 stickers, but he used to have more. Riley gave his brother 80 stickers, gave his sister twice that amount and gave his friend Zoe three times the amount he currently has. How many stickers did Riley start with?
Sophia started the day with 50 pencils. At recess, she lost 5 pencils while playing. At lunchtime, she gave her best friend Nathan 7 pencils. In the afternoon, Sophia's mom bought her a new set with 18 pencils. Nathan came back and gave Sophia twice as many pencils as he received at lunch. How many pencils did Sophia end the day with?
Hannah can row 7 miles an hour. Her friend Olivia can row 9 miles an hour. If they start in the same place and row in straight lines in opposite directions for 4 hours, how many miles apart do they end up?
Sophia is three times as old as her sister Olivia. If Olivia is 16 years old, how many years older is Sophia than Olivia?
A bookstore has 500 paperbacks and 700 hardcovers on its shelves. If the number of paperbacks increases by 200 and the number of hardcovers increases by 50%, how many total books will the bookstore have?
Adam can type 40 words per minute, and his coworker Rachel can type 60 words per minute. If they work together to type a 10,000-word document, how many minutes will it take them to finish it?
In a bookshelf, there are 10 fewer history books than science books and 3 more romance books than science books. If there are 25 science books, how many history books are there?
If it takes 5 machines 5 minutes to make 5 widgets, how many minutes will it take 15 machines to make 30 widgets?
Tom is working on his mathematics project. He has 18 papers of 5 problems each. For the first 10 papers, he did three problems each. How many problems are left for Tom to solve?
Every gallon of gasoline costs $2 in town. In a 20-gallon gas tank of a car, there is 8 gallons of gasoline. If the tank needs to be filled, how much will it cost to fill the tank?
In an art class, students are tasked to create a painting. The painting requires 5 different colors each containing 2 ounces of paint. The teacher has 20 ounces of blue paint, which is enough for how many paintings?
There are three meetings scheduled today. If each meeting lasts 45 minutes, how many minutes will all three meetings take?
Lisa is planning a picnic. She bought 3 times as many eggs as sandwiches. If Lisa has 6 eggs, how many sandwiches did she buy?
A bakery sells 240 loaves of bread per day. If the bakery operates for 7 days a week, how many loaves of bread will they sell in a week?
A snail is at the bottom of a 20-foot well. Each day, it climbs up 3 feet, but at night, it slips back 2 feet. How many days will it take for the snail to reach the top of the well?
A box of chocolates weighs 1.5 pounds. If Sara bought 8 boxes of chocolates, how many pounds of chocolates did she buy?
A water tank can hold 900 gallons of water. If 300 gallons of water are already in the tank, how much more water can be added?
A bookshelf has 5 shelves, and each shelf can hold 8 books. If the bookshelf is currently empty, how many books can be placed on it?
To make his evening dinner, Chef Andy needs at least three times as much beef as Chef Mia does. If Chef Mia uses 150 grams of beef, how much beef do they use together?
All happy animals in the zoo have ears that are twice as long as their noses. If the noses of the happy animals in the zoo are an average of 5 cm long, how long are their ears on average?
A strong storm destroyed some of the 800 flowers in Emily's garden. If 120 flowers were destroyed, and Emily wants to split the remaining flowers equally into baskets containing 20 flowers each, how many baskets can Emily make?
Percy's piggy bank has twice as much money as his cousin Piggy's bank. Percy's cousin Piggy has 12 dollars in his bank. How much money do they have altogether?
Aaron has 80 buttons, and he wants to distribute them equally into packets containing 4 buttons each. If he decides to give away some of the packets to his friends as presents, and he has 16 buttons left, how many packets did he give away?
While assembling a puzzle, Lucy needed 12 pieces every 90 minutes. How many more puzzle pieces would she have assembled if she had spent 6 hours assembling the puzzle?
When Jimmy turns 24, he will be three-fourths the age of Susan and one-third as old as Jack. Jimmy is 18 years old now. What is the sum of the ages of Susan and Jack now?
Michael is a music composer and has agreed to write some scores for his friend's film. The only instrument he has limited knowledge of is the harmonica so he counts how many different harmonica notes he needs. Each harmonica note will hold enough music for 5 film scenes. Michael decides to bring 8 sets of harmonica notes, each of which holds 3 harmonica notes, and this will be the exact amount he…
Emily sells 30 candles for $20 each. The wax cost $200. How much does she make in profit?
Anya's family has 30 boxes of cookies for a bake sale. Her brother has already sold twice the amount of boxes she has, and her sister, Cati, has sold one-and-a-half times the amount that Anya has. How many boxes of cookies did Anya start with?
Dr. Patel is 30 years older than her son. If they will have a combined age of 170 in 15 years, how old is Dr. Patel's son currently?
For a school play, 120 seats were taken up by parents, and 2/3 of the remaining seats were occupied by students. If the theater has a total of 240 seats, how many students attended the play?
In a jar of 150 jelly beans, 1/5 are red, 2/5 are green, and the rest are blue. How many blue jelly beans are there in the jar?
Jack has 15 more years of service than Jane, and Jane has 10 more years of service than Jill. If the sum of their years of service is 70, how many years of service does Jill have?
William has planted 25 pink roses, 16 yellow roses, and 8 red roses in his garden. How many more pink roses has William planted than yellow roses?
A bakery sells 5 dozen cookies in the morning and 3 more than twice as many in the afternoon. If a dozen is 12, how many cookies did the bakery sell in total during the day?
A water tank can hold 1200 liters of water. If 1/3 of the tank was filled during the morning and 2/5 of the remaining capacity was filled in the afternoon, how many liters of water was added in the afternoon?
Sam has 3 times as many sisters as brothers. If Sam has 12 siblings in total, how many brothers does Sam have?
A car travels from city A to city B at an average speed of 80 km/h. On the way back, the car travels at 20 km/h slower than the average speed from city A to city B. How many hours will it take to travel 240 km from city B to city A?
Sophia has 18 pencils in her pencil case. She gets a new set of pencils every week. If she received 12 pencils last week and the week before, but this week she received three times the amount she got last week, how many pencils does Sophia have now?
Michael's favorite hobby is making sandwiches. He sells each sandwich for $2.00. If he makes 12 sandwiches and spends $5.00 on ingredients, how much profit does Michael make?
Jessica bought a rectangular garden with an area of 120 square feet. If the garden is 15 feet wide, what is the length of the garden?
David and Susan are running for class president. Susan got 18 votes, 3 more than half of what David got. How many votes did David get?
Chris bought a new bike for $120. He got a 20% discount on the bike. How much did Chris pay for the bike?
Professor Smith has three science classes with 35 students in each class. He also has one history class with 20 students. How many students does Professor Smith have in total?
Ruby buys a shirt on sale for 30% off. The original price of the shirt was 60 dollars. How much does Ruby pay for the shirt?
Jack and Jill went to the candy store and bought 15 pieces of candy. Jack ate 1/3 of the total candy and Jill ate 1/5 of the total candy. How many pieces of candy did they have left?
Tom is planning a trip to Hawaii. He booked a flight that cost 500 dollars. He also booked a hotel that costs 80 dollars per night for 5 nights. How much did Tom spend on his trip in total?
Sarah and Emily are having a contest to see who can catch the most fish. Sarah caught 15 fish and Emily caught 20. If the total number of fish caught is 55, then how many fish did the other people catch?
Maria is filling out a survey with 8 charts. Each chart has 15 rows. If Maria fills out 7 charts fully, and then fills out 20 more rows in the remaining chart, how many rows in total has Maria filled out?
In a library that holds 20000 books, 25% are novels and 12% of the novels are on the most popular page. If there are 4 rows of books on the most popular page, and each row holds 35 books, how many books are not on the most popular page?
In a catering company, each meal costs $7, and the catering company caters to 4 companies each day. If they make a profit of 25% on each meal, how much profit does the company make in a day?
Out of 500 people, there are 300 women and 40% of the women are employed. How many men are not employed assuming all the employed people are women?
A grocery store orders 100 cases of canned tomatoes. Each case holds 12 cans of tomatoes. If they already have 60 cans of tomatoes in stock, how many cans of tomatoes will they have in stock after they receive their order?
Alex has been saving money for a vacation. He plans to save 50 dollars a week. If he needs 500 dollars for the trip, how many weeks should he save?
Ben's website gets 60 hits per hour. If the website operates 24 hours a day, how many hits does it get per day?
A factory produces 4000 boxes of cereal in a day. If there are 24 boxes in a case, how many cases are produced in a day?
A bakery bakes 120 cookies per hour. If it operates 8 hours a day, how many cookies are baked in a day?
Emily is going to the movies with her friends. There are 20 seats in a row and the theater has 10 rows. If half of the seats are occupied, how many seats are occupied in total?
In a bookstore, fiction books make up 35% of all books, and non-fiction books make up the rest. If there are 400 fiction books, how many books does the bookstore have in total?
At the annual talent show, contestants have to perform for exactly 5 minutes each. If 24 contestants perform, how many minutes are spent on performances altogether?
Chef Emma’s recipe for chicken parmesan requires a ratio of 3 parts chicken to 2 parts breadcrumbs. If she needs 18 parts chicken, how many parts breadcrumbs will she need?
Ben’s soccer team has 9 games scheduled for the month of June. If they win 2/3 of their games, how many games will they win?
Alice’s garden has 240 flowers, and she wants to add 15% more. How many flowers will Alice have in her garden after adding more?
Gina's bakery sells donuts packed in boxes containing 6 donuts each. If she has 160 boxes, how many donuts does she have in total?
Sophia has 15 more red buttons than her sister. If Sophia gives her sister 5 red buttons, how many buttons will her sister have if she initially had 20?
A truck carrying apples from the farm to the market travels 80 km/h. If the distance between the farm and the market is 400 km, how many hours will it take the truck to reach the market?
Carlos watches TV for 2 hours each day. If he watches TV for 7 days a week, how many hours will he watch TV in a year?
A water tank can hold 1200 liters of water. If 400 liters of water were already poured into the tank, how much more water can still be poured into the tank?
Luke buys two pizzas for a total of $40. He needs to buy also a bottle of soda which costs $5. How much change will he receive from $50?
A grocery store has 125 boxes of cereal. They put 5 boxes in each carton. How many cartons of cereal boxes can they make?
Alex is training for a marathon. She runs 8 miles on Monday, 12 miles on Wednesday, and 15 miles on Friday. How many miles does she run in total during the week?
Tom's mother has 36 cupcakes to decorate for a party. She puts 4 cupcakes on a tray. How many trays can she fill with cupcakes?
Mark has 240 dollars to spend on new clothes. He buys a shirt for 40 dollars, a pair of pants for 50 dollars, and a jacket for 80 dollars. How much money is left to buy shoes?
In the town of Deerfield, there are 15% more residents who are married than residents who are single. If there are 1200 married residents, how many single residents are there?
Mayfield Appliances produced 200 washing machines and 300 dryers in a specific quarter. If the production of dryers increases by 10% and washing machines decreases by 20%, how many washing machines and dryers will they produce in the next quarter?
For the annual science fair, Ms. Penny needs to prepare 300 bags of popcorn with a specific ratio of 3 cheese to 2 caramel. If she has 240 cheese packets and 120 caramel packets, how many more cheese packets does she need to buy?
The local bakery sells 3 times as many cupcakes as cookies. On a specific day, the bakery sold 150 cookies. If they sold 72% of their daily total of cupcakes, how many total cupcakes did they have?
At St. Mary's High School, there are 25 students in the chess club. Of these, 40% are also part of the debate team. If the debate team has 40 members, what percentage of the debate team is also in the chess club?
A bookshelf has 5 shelves, and each shelf has 8 boxes of books. If each box contains 25 books, how many books are there in total?
Emma is planning a birthday party and wants to make some candies. If she needs 4 cups of sugar to make 1 batch of candies, and she wants to make 5 batches, how many cups of sugar will she need in total?
A factory produces 2000 pens every hour. If the factory operates for 5 hours, how many pens does it produce in a day?
A swimming pool holds 10000 liters of water. If 2000 liters of water are used for other purposes, what percentage of the water is left in the pool?
There are 50 students in a school, and the school has 10 computers for every 5 students. How many computers are there in total?
Rachel bought a new DVD player for $250 and a video game for $50. She gave the cashier a $500 bill. How much change will she get?
Mark read 21 books last month and his sister read 17 books. If Mark reads the same number of books this month, how many books will he have read in total by the end of this month?
Lucas had 45 stickers in his sticker book. He gave 5 stickers to his brother and 3 times as many stickers to his sister. How many stickers does Lucas have left?
Alex can type 80 words per minute. If she needs to type a paper that is 2400 words, how many minutes will it take her to finish typing?
A bakery sells a total of 500 loaves of bread per day. They sell a combination of white bread for $2 and whole wheat bread for $3. If they sell 200 loaves of white bread, how much money did they make in total that day?
Emily has 12 books, and each year she is given 2 more on her birthday. If she reads 1 book every 2 months, how many books will she have left unread after 3 years?
A bakery makes 240 apple pies and 120 cherry pies each day. If they sell 300 apple pies and 180 cherry pies on a particular day, how many pies are left at the end of the day?
Michael and his family go on a trip. They drive 125 miles the first day, 185 miles the second day, and 140 miles the third day. If their car gets 22 miles per gallon, and they started with 17 gallons, how many gallons of gas will they have left at the end of the trip?
In a school, there are 15 classes and each class has 28 students. The school decides to add 7 new students to each class. How many students are there in total in the school now?
A toy store has 480 toys on its shelves. The store owner adds 170 more toys to the shelves. Later, she decides to give 2 toys to each of her 12 employees. How many toys are left on the shelves now?
If it takes 12 workers 6 days to dig 24 wells, how many days will 18 workers take to dig 36 wells?
Ahmed has 60 strawberries, of which 15% are spoiled. How many good strawberries will Ahmed have after he throws away the spoiled ones?
A racing track has 5 lanes where cars are racing. Each lane can hold 10 cars, and the total number of cars racing is 45. In how many lanes are there fewer than 10 cars?
Anish has a bookshelf with 5 shelves, and each shelf can hold 8 books. If the bookshelf is currently empty, how many books can Anish place on it in total?
A farmer has 300 apples, of which 60% are red. How many apples are not red?
Emily bought two boxes of chocolates. Each box contains one third of the number of chocolates that she already has. If Emily has 24 chocolates now, calculate how many she had initially?
The local pool has three times as many swimmers as the community center has basketball players. If the community center has 30 basketball players, calculate the combined number of people at both places?
Lucas collects stamps. He has 50 French stamps. His uncle gave him 15 more from the UK, and his aunt gave him twice as many from Asia. If Lucas has 10 stamps from Africa, how many stamps does he have in total?
Sofia has 20 cookies. She gave twice as many cookies to her brother as she gave to her sister. Her sister got twice as many cookies as the neighbor. How many cookies does Sofia have left?
Kate farms apples. She uses a special machine that separates apples into three baskets in a 2:3:5 ratio. If Kate puts 40 apples into the machine, how many apples does the largest basket hold?
Sophia makes 12 batches of cookies a week. How many batches of cookies will Sophia make in 4 weeks, if she only makes 8 batches in the first week?
At the table hockey game, Raj scores half as many goals as Diego. If Diego scores 30 goals, how many goals did they score together?
At the art fair, Maria buys two paintings each priced at $50. If she puts a 10% markup on each and sells both of them, how much did she make from the sale of the paintings?
The city of Peterborough has 200 fewer people than Oshawa. Oshawa has 3 times as many people as Ajax. If Peterborough has 2400 people, how many people are there in Ajax?
Using all the ingredients, a chef can make 15 salads containing 2 lettuce leaves and 1 tomato each. If she starts with 45 lettuce leaves, how many tomatoes does she have?
A florist arranges bouquets of sunflowers. She needs 15 flowers for a small bouquet, 30 flowers for a medium bouquet, and 45 flowers for a large bouquet. If she has 180 flowers, how many large bouquets can she make?
Lisa is saving money for a new bike. She saves $15 per week from her allowance. If the bike costs $180, how many weeks will it take her to save enough money?
A bakery sells 150 loaves of bread per day. They make a profit of $1.20 per loaf. How much profit do they make in a 5-day week?
Tom works at a bookbinding shop. For every 10 books they bind, they use 5 meters of thread. If they bind 240 books in a day, how many meters of thread do they use?
A group of friends want to share some candy equally. If they have 480 pieces of candy and there are 8 friends, how many pieces of candy will each friend get?
If 10 pairs of sunglasses are purchased for $300, how much did it cost to buy 3 pairs of sunglasses?
Mia earns $10 for each lawn she mows and $15 for each dog she walks. If she mows 4 lawns and walks 2 dogs, how much money will she earn in total?
Mark has 25 shirts, 15 of which are blue. What percentage of his shirts are blue?
There are 10 birds perched on a tree branch. If 2 more birds of the same species join them, what percentage increase is this?
Andrew's water tank can hold 300 gallons. If he fills it with 30 gallons of water every hour, how many hours will it take him to fill the tank?
In the pile of homework Mrs. Johnson graded, she found 45 papers were late and 23 papers were from freshmen. If there are 15 papers from freshmen who submitted on time, how many students in total submitted their homework on time?
Olive expects to earn $1500 in 5 years. She currently earns$120 per year. By what percent does Olive need to increase her salary each year to meet her goal?
Of the 18 cookies in the jar, 4 are sugar-free and the remaining ones are with sugar. If 5 cookies are removed, what fraction of the remaining cookies will be sugar-free?
Gordon bought a watch for $230 and a bag for$120. The store is offering a discount of 10% on all items. How much will Gordon pay after the discount?
Bette has 21 pairs of earrings. If she donates 3 pairs to the charity and buys 4 more pairs at the store, what is the total number of pairs of earrings Bette has at the end?
Sarah can pick 4 baskets of strawberries an hour. Her brother Alex can pick 5 baskets an hour. If they start picking strawberries at the same time and pick for 4 hours, how many more baskets of strawberries does Alex pick than Sarah?
Harry spends $10 per week on snacks. His mom promised to give him a $2 allowance per week if he studies for extra 30 minutes per day. How much money will Harry earn from his mom during a school year?
Evelyn sells dresses in her boutique. If each rack holds 8 dresses, and Evelyn has 12 racks with dresses, how many dresses does Evelyn have in total?
Lucy's school is planning a field trip to a nearby city, 240 miles away. If the bus travels at 40 miles per hour, how long will it take the bus to reach the city?
Jane has 250 stickers in her sticker book. She decides to buy 4 packs of stickers, with each pack containing 20 stickers. Her friend gives her 15 extra stickers as a gift. How many stickers does Jane have in her sticker book now?
Tom has 5 boxes of apples where each box contains 18 apples. If Tom gave 22 apples to his neighbor, how many apples does Tom have left?
A bakery makes 480 loaves of bread per day, and 2 out of every 5 loaves are sold. How many loaves of bread are sold per day by the bakery?
Sammy's grandmother owns a poodle breeding business. She has 16 breeding poodles, and each breeding poodle will have 5 puppies every year. How many puppies does Sammy's grandmother expect to have at the end of the year?
A financial advisor manages investments for several clients, including three individuals who invest $1200 each and two companies that invest $5000 each. How much money does the financial advisor manage in total?
Lindsay is a photographer and she has agreed to take pictures of a school's students for their yearbook. There are 60 classes in the school and Lindsay takes 25 pictures per class. How many total pictures will Lindsay take for the yearbook?
Cynthia's father is five years older than her mother, and Cynthia's mother is six years older than Cynthia. If the sum of the ages of Cynthia, her mother, and her father is 86 years, then how many years old is Cynthia's father?
Daniel eats a quarter of a pizza in one hour, and his sister eats one slice every hour. If Daniel and his sister eat the entire 16 slice pizza in 4 hours, how many slices do Daniel's sister eat?
A car travels 240 miles in 4 hours. If it travels at the same rate, how many miles will it travel in 7 hours?
Alex has three bags of oranges. The first bag has 15 oranges, the second bag has 12 oranges, and the third bag has 21 oranges. How many bags does Alex need to buy more to have a total of 60 oranges?
There are 50 students in a class, of which 22 are boys. If the ratio of boys to girls is 11 to 17, how many more girls does the class need to meet this ratio?
Ashley has a large bookshelf with 6 shelves, and each shelf can hold 8 boxes of books. If she already has 24 boxes on the shelves, how many more boxes can she fit on the shelves?
Tony's farm has 250 acres of land. He wants to plant wheat on 1/5 of the land and corn on 1/3 of the land. What fraction of the land is left to plant other crops?
On a road trip, Henry's family drove 240 miles on Monday, 160 miles on Tuesday, and 120 miles on Wednesday. If they drove for 5 hours on Monday and 4 hours on Tuesday, what is their average speed for the entire trip?
Kayla's aquarium has 12 fish, and she wants to add new ones. She can add 4 fish for every 3 fish she already has. How many fish can she add?
By the end of the summer, the local pool had collected 420 pounds of trash. If they collected 30 pounds of trash per week for 14 weeks, how many pounds of trash did they collect per week during the remaining weeks?
Jimmy can read 12 pages of a book in 2 hours. His friend Sharon can read 9 pages of the same book in 3 hours. If Jimmy reads for 6 hours, and Sharon reads for 4 hours, how many more pages will Jimmy read than Sharon?
Barry has $2000 in his savings account and he withdraws $300 every month. If there is a monthly interest of 0.25%, how much money will Barry have after 6 months?
Samantha can make 40 pizzas in 4 hours. Her friend Emily can make 48 pizzas in 6 hours. If Samantha and Emily work together for 5 hours, how many pizzas can they make?
A factory can produce 1200 boxes of cereal every 3 days. The factory operates 7 days a week. In a month of 31 days, how many boxes of cereal can the factory produce?
In a small village, there are 35 houses. Of those houses, 10 houses are blue, and 17 houses are white. The rest are red. How many red houses are there in the village?
Samantha can cook 30 meals in an hour. Her sister Julia can cook 20 meals in an hour. If they start cooking at 2:00 pm and cook until 4:00 pm, how many meals will they have cooked in total?
A swimming pool contains 1500 gallons of water and 10 gallons of chlorine. If 300 gallons of water are drained from the pool, how many gallons of chlorine are in the pool for every 100 gallons of water?
The price of a shirt is 20% more than the price of a hat. If the hat costs 40 dollars, what is the total cost of buying two shirts and a hat?
James has 95 more stamps than Ellen. If Ellen gives James 21 stamps, how many more stamps will James have than Ellen afterwards?
A bakery sells 5000 loaves of bread per month. They also sell 2000 muffins per month. If the bakery decides to increase production by 20% for both loaves of bread and muffins, how many more loaves of bread and muffins will they sell altogether?
In a factory, there are 5 machines that produce 10 boxes each hour. Another 3 machines produce 12 boxes each hour. If the factory operates for 10 hours, how many boxes will be produced?
Mary has a habit of saving coins in a piggy bank. She has been saving for 10 weeks and has a total of 50 dollars. If she adds 5 dollars each week, how much will she have after 5 more weeks?
The local grocery store sells 2 loaves of bread and 3 bottles of milk for 5 dollars. If you want to buy 4 loaves of bread and 5 bottles of milk, how much will it cost?
Alex is trying to save money for a new bicycle. She has saved 30 dollars and plans to add 10 dollars each week. If the bicycle costs 150 dollars, how many weeks will it take Alex to buy it?
At a school's annual fair, there are 3 game stalls charging 5 dollars per game, and 2 food stalls selling snacks for 3 dollars each. If a student plays all 3 games and buys 2 snacks, how much will he spend in total?
The company, Classic Coins, buys new coins every quarter. The first quarter, they bought 40 coins. Each quarter after that, they bought 20 more coins. How many coins did they buy on the third quarter?
Olivia wakes up at 7 a.m. every day, and she needs to be at school at 9 a.m. She reduces her morning routine by 15 minutes each month. How much time will she have before she needs to go to school next month?
Justin has 15 pencils in his math book. His friend Philip has 2 fewer pencils than Justin. If they both found 7 more pencils each, how many pencils do they have altogether?
Matthew can walk 5 miles an hour. His friend Diego can walk 3 miles an hour. If they start in the same place and walk in straight lines in opposite directions for 2 hours, how many miles apart do they end up?
Biking for 4 hours, Olivia burnt 50 calories every hour. How many more calories would she have lost if she would have biked for seven hours?
A popular bookstore offers 400 books on fiction and 300 books on non-fiction. If they sell 20% of the fiction books and 15% of the non-fiction books, how many books remain unsold?
Tom, Alex and Rachel can paint a room in 12, 9 and 6 hours respectively. If they work together, how many hours will it take them to paint the room?
A bakery sells 240 loaves of bread daily, and each loaf contains 12 slices. If they want to package 4 slices per bag, how many bags can they make daily?
Emily has 75 stickers in her sticker book. Her friend gave her 65 more stickers and her sister took 25 stickers away. If Emily gave 10 stickers to her brother, how many stickers does Emily have left?
A local library has 1200 books, and 30% are fiction books. If the library purchases another 400 books, and 200 of them are fiction, what percentage of the books in the library are fiction?
Amy has 120 cookie boxes. She wants to deliver them to 10 stores, so she needs to put 12 boxes into each store. If 20 boxes could not be delivered because of a storm, how many boxes in total are left after the delivery?
A bricklayer can lay 15 bricks in one hour. How many hours will it take him to lay 210 bricks if he works at the same rate?
A tennis club has 3 courts. During the day, each court is used by 8 players, and at night, by 6 players. How many players use all the courts in one day?
At the craft fair, Mary and Jane bought some items. Mary bought 3 times as many items as Jane bought, and Jane bought 7 items less than a boy named Mike. If Mike bought 30 items, how many items did Mary and Jane buy altogether?
A salesman can travel 120 miles in 4 hours. If he increases his speed by 20 miles per hour, how many hours will it take him to travel 240 miles?
Hannah currently has 20 bags of flour, but she used to have more. Hannah gave her aunt 40 bags of flour, gave her cousin twice that amount and gave her neighbor three times the amount she currently has. How many bags of flour did Hannah start with?
When Nathan turns 25, he will be one-quarter the age of Rachel and three times as old as Olivia. Nathan is 10 years old now. What is the sum of the ages of Rachel and Olivia now?
Emily teaches 40 students a semester. How many students will Emily teach in 8 semesters if in the first semester she only teaches 32 students?
Julia is trying to raise money for a school event. She is selling cookies for $3. She is also selling brownies for $6. She wants to raise $1500. She only had 25 brownies that she sold out. How many cookies does Julia need to sell to reach her goal?
Michael sells 30 paintings for $20 each. The paint cost $200. How much does he make in profit?
Mrs. Johnson wants to organize her library with a theme of 12 books per shelf and 6 shelves on each bookcase. If she has 180 books and wants to use all the bookcases, how many bookcases will she need?
Farmer Brown has 200 acres of land for his cornfield. He plants 5 different types of corn, using an equal amount of land for each type. What is the area of land he used for each type of corn?
Timmy attends a concert where there are 15 rows of chairs with 20 chairs in each row. If the audience takes up 3/4 of the chairs, how many people are sitting in the audience?
Emma's family has a pet store where they sell 250 rabbits, 120 hamsters, and 150 guinea pigs each month. What is the total number of pets sold per month?
A toy factory produces 800 dolls, 600 teddy bears, and 400 toy cars every week. If they produce these toys for 5 weeks, what is the total number of toys they produce?
Mario had 5 bags of candy, each bag weighing 3 pounds. During a party, a mischievous kid ran off with two bags. What is the total weight of candy left with Mario?
Camila's favorite juice is lemonade. She made 15 cups of lemonade for her party and gave 2 cups to her neighbor. If she needs 3 cups of lemonade to make a pitcher, how many pitchers can she fill?
Lily has 18 stuffed animals. She decided to donate 6 to the local charity and kept the rest. What fraction of stuffed animals did Lily donate?
Max had 12 stickers in his sticker book. He gave 2 stickers to his friend and bought 5 more from the store. What is the total number of stickers Max has now?
Sam can ride his bicycle 12 miles per hour. If he rides his bike for 2 hours in the morning and 1 hour in the evening, how many miles will he travel in total?
Evelyn has three times as many pets as Ethan. Ethan has 4 birds and 8 cats. How many pets does Evelyn have in total?
Lucas can hit 65 tennis balls with his tennis racket in one hour, and Mateo can hit 10 more tennis balls than Lucas. If they play tennis for three hours, how many tennis balls will they hit together?
Pauline had a total of $450 in her three piggy banks. The blue piggy bank has $100, and the red piggy bank has twice as much money as the green piggy bank. How much money is in the green piggy bank?
Boris's favourite toy cars can travel 15 meters in 3 seconds. If they travel at the same speed, how many meters will they travel in 12 seconds?
There are 18 more students in class A than class B. Class A has 5 more students than class C. Class B has 240 students. How many students are there in class C?
The company Green Clean has two branches in the city. The main office is located downtown, and the other office is located uptown. The downtown office has 250 computers, and the uptown office has half the number of computers as the downtown office. If the company bought 20 more computers for each office, how many computers does Green Clean have now in both offices?
Karen's parents surprise her with a special gift on her birthday, a new robotic puppy called RoboPet. They tell her she can charge it once every 4 hours, and the robotic puppy's battery lasts for 12 hours. If Karen charges RoboPet at 10 am, what time will it run out of battery?
Benny has a piggy bank where he saves his money. He has 400 coins in the piggy bank. Benny decides to divide the coins equally among 8 of his friends. How many coins will each friend receive?
The school cafeteria sells 220 sandwiches during lunchtime. On Monday, they sold 150 sandwiches, and on Tuesday, they sold 20 more sandwiches than on Monday. How many sandwiches did they sell on Wednesday?
A bakery is having a holiday sale on cupcakes. They have 300 cupcakes, and they are offering a 10% discount on the total price. If each cupcake costs $2, how much will you pay if you buy all the cupcakes with the discount?
Sam has a spherical water tank with a capacity of 1200 gallons. The tank was initially empty but filled with water from two pipes. Pipe A filled the tank at a rate of 30 gallons per minute and pipe B at a rate of 50 gallons per minute. How many minutes will it take to fill the entire tank?
The city of Springfield has three public libraries. The main library has 15,000 books, and the branch libraries have one-fifth that amount. How many books do the three libraries have in total?
Rachel wants to make cookies that require 2/3 cup of sugar for every 3 cups of flour. If she has 18 cups of flour, how much sugar will she need to make the cookies?
The local gym has three classes: yoga, Pilates, and weight lifting. There are 25 students in yoga, 12 more students in Pilates, and 50% more students in weight lifting than Pilates. How many students attend classes at the gym?
Emily bought a packet of 1200 music downloads. She downloaded 250 music tracks, then used up the rest of the downloads on two more albums. If one album has 300 tracks and the other has 200 tracks, how many tracks did the first album have?
Tom's car needs 2 quarts of oil every 300 miles. If he drives his car 2100 miles, how much oil will he use in total?
In a school, 35% of the students failed their math test. If there are 700 students in total, how many students passed their math test?
Tom has $25 to spend on toys. He buys 3 dolls and 2 cars. Each doll costs $3 and each car costs $2. How much money does Tom have left?
A music teacher owns 18 violins, 12 cellos, and 20 guitars. She lends 1/3 of her violins and 1/4 of her cellos. How many instruments does she have left?
A farmer has 16 bags of apples. Each bag contains 24 apples. If he gives 1/2 of the apples to a friend, how many apples does he have left?
A book club is made up of 18 members. Half of them are females. What is the total number of males in the club?
Liza is in charge of purchasing new bicycles for the school. She needs to buy 12 bicycles, and 12 helmets. If the bicycles cost $20 each, and the helmets cost $12 each, how much will Liza need to spend in total for the bicycles and helmets?
If John buys 3 shirts, a pair of jeans, and a hat for $120, and the pair of jeans and hat are on sale for 40% off the original price of $70 for the jeans and $30 for the hat, what is the original price of each shirt?
A restaurant is running a promotion where customers can get a 25% discount on their meals. If Mark's meal originally costs $50, how much will he need to pay after applying the discount?
Sarah has 30 stickers, and she wants to share them equally among her 5 friends. How many stickers will each friend receive?
Jessica owns 15 bags of apples. If she decides to increase the number of bags by 12, how many bags of apples will Jessica own?
A company has 15 departments, and each department has 8 sections. If each section has 12 employees, how many employees does the company have in total?
At a book fair, there are 50 books on the sale table. Of those books, 80% are novels. Of the novels, 30% are bestsellers. How many bestsellers are on the table?
Ben has 2 identical boxes of identical crayons. Box 1 contains 12 packs of crayons, with 8 crayons in each pack. Box 2 has 12 packs as well, but each pack contains 12 crayons. How many crayons does Ben have in total?
The zookeeper has 3 cages with 5 monkeys in each cage. If he adds 2 more monkeys to each cage, how many monkeys will the zookeeper have in total?
John has a total of 75 marbles in a bag. He has 15 blue marbles and 25 red marbles. How many green marbles does he have?
Ryan is buying books for school. Each book costs $8 and each notebook costs $4. If he has $36 and wants to buy three books and some notebooks, how many notebooks can he buy?
Alex is making rows of seats in a movie theater. Each row has 9 seats and there are 3 cushions on each seat. There are 12 rows in the theater. How many cushions are there in the theater?
In a group of 300 people, 1/3 are smokers and 20% of the smokers smoke cigars. How many people in the group smoke cigars?
Susan is baking cookies for a party. Each box holds 6 cookies and she needs 3 boxes for each table. There are 8 tables at the party. How many cookies does she need to bake?
Penny has been saving up money for a long time. She has $105, which she wants to distribute equally among 5 of her closest friends. How much money will each friend receive?
Maria is making a giant pizza for her birthday party. The pizza has a diameter of 42 inches. If she wants to make a circular border around the pizza that is 3 inches wide, what is the area of this border?
There are 12 members in a book club. Each member reads 3 books per month. If they extend their membership for 9 months, how many books will they read in total?
Four friends, John, Emma, Tom, and Olivia, want to share some candies. If John takes one-fourth, Emma takes one-sixth, and Tom takes one-eighth, what fraction of the candies are left for Olivia?
Alex is planning a road trip from New York to California. The total distance is 2800 miles. If he drives 8 hours a day at a speed of 60 miles per hour, how many days will it take him to reach his destination?
Lucia is planning a road trip from her home in Barcelona to Rome. She has mapped out two routes. Route A goes through France and takes 3 days, while route B goes through Switzerland and takes 5 days. If Lucia drives at a constant speed of 200 km/h, and route A is 100 km shorter than route B, what is the total distance of route A?
Tony has started a business selling handmade watches. In the first year, he sold 1000 watches. In the second year, his sales increased by 20% and in the third year, his sales increased by 15% compared to the previous year. How many watches did Tony sell in the third year?
A local charity is organizing a book drive. The drive has received a total of 5000 books. Three-quarters of the books are fiction, and the remaining books are non-fiction. If 200 books are romances, what percentage of the fiction books are romances?
Sophia has 10 large boxes, each weighing 10 kg, and 5 small boxes, each weighing 5 kg. She gives 2 large boxes and 1 small box to her sister. What is the total weight of the boxes Sophia has left?
Every month, John saves 20% of his salary. His salary is $2000 per month. In a year, how much will John have saved?
Coach Wilson has 35 players on his rugby team. Of those players, 70% have parents that attended the same college. Of those who have parents that attended the same college, 35% also have siblings that play on the team. How many players on the team have both parents that attended the same college and siblings that play on the team?
When Tim makes lemonade, he mixes it with a ratio of two parts sugar to three parts lemon juice, and he adds one slice of lemon for every three cups of lemon juice. For every two slices of lemon, he adds one liter of water. He used six liters of water in his latest batch of lemonade. How many cups of sugar did he use?
In Mrs. Taylor's art class, she assigns projects that require 10 kilograms of clay per student. She has 25 students total. She has 45 bags of clay available, with each bag containing 20 kilograms of clay. How many kilograms of clay will she have leftover after all the students complete their projects?
Emily has $50 to buy as many boxes of crayons as she wants. The boxes cost $10 each, and she gets a discount of 20% off the total if she buys more than 5 boxes. How much change will she have left over if she buys the maximum number of boxes she can afford, taking the discount into consideration?
Mr. Chen's bakery sells 250 loaves of bread per day. Of those loaves, 60% are whole wheat, of which 20% are sold to the local health food store. How many loaves of whole wheat bread are sold to the local health food store daily?
Rosie is a fitness instructor who teaches Yoga to 50 students and Pilates to 30 students. 10 students take both classes. How many students are taking only one of the two classes?
Kokomo has 10 times as many books as Kowloon. If Kowloon has 5000 books, how many books does Kokomo have?
In Ms. Lupin's bakery, she puts 4 cookies in every bag. If she has 72 bags of cookies, and 1/3 are sugar cookies, how many sugar cookies does she have?
In a field, there are 75 sheep and 50 goats. If 20% of the animals are sheep, what percent are goats?
Ava is making cupcakes for her friend's birthday party. She needs 24 cupcakes for the party, and she uses 3/4 of a bag of flour for every 8 cupcakes. How many bags of flour will she need?
A bookshelf has 8 shelves, and each shelf can hold 12 books. If the bookshelf is currently empty, how many books can it hold in total?
There are 200 jellybeans in a jar, if 25% of them are red and 10% of them are orange, what percentage of jellybeans left are not either red or orange?
As the sun rises, the shadow of a 20-meter tall pole is 5 meters. What is the angle between the ground and the shadow?
5 apples cost 5 dollars. How much would it cost to buy 15 apples?
Sam's bike is 3.5 meters long, and Tom's bike is 2 meters longer. What is the total length of both bikes?
Sammy had 5 dogs. At the dog shelter, he found 2 dogs that he adopted. After that, he gave 1 dog to his friend. Later, he bought 3 more dogs from a pet store. How many dogs does Sammy have now?
At lunch, a group of friends decided to share their bills. Bill 1 was $21, Bill 2 was $35, Bill 3 was $17, Bill 4 was $23 and Bill 5 was $19. If they decided to split the bills equally, how much will each person pay?
Sarah baked 24 cookies for her family reunion. If she put 4 cookies in each bag, how many bags can she fill?
Peter's garden has 18 flowers. He decides to plant 6 more flowers. If each bag of seeds has 3 flowers, how many bags of seeds does Peter need?
Mark has $120 to buy new clothes. He decides to spend 1/3 of his budget on a shirt, 1/4 on a pair of pants, and the rest on a jacket. How much will he spend on the jacket?
Tiffany has three dogs, and each dog needs to eat 2 pounds of food per day. If she buys a 30-pound bag of food, how many days will it last?
In a cafeteria, the ratio of boys to girls is 3:5. If there are 60 more girls than boys, how many students are in the cafeteria?
Alex, a clothing designer, sews 12 dresses every two days. At this rate, how many dresses will he sew in 12 days?
A bakery sells 240 loaves of bread at $2 each. If the bakery wants to make a profit of $120, what should be the cost price of each loaf?
Ricky has a rectangular garden with a length 3 times its width. If he has 30 meters of fencing, what is the width of his garden?
Sofia currently has 25 socks, but she used to have more. Sofia gave her mom 40 socks, gave her dad three times that amount and gave her brother twice the amount she currently has. How many socks did Sofia start with?
In a small school where there are 100 students, there are 30 boys in 3rd grade, 15 girls in kindergarten, and some girls in 2nd grade. How many girls are there in 2nd grade?
Alex has three rabbits. Every month, his parents buy him one more, but one of them runs away. How many rabbits will he have in seven months?
Running for 1 hour, Kate burnt 20 calories every half hour. How many more calories would she have lost if she would have run for seven hours?
Every month of this year Julia tried out a new type of jam. The first month, she made a jam recipe that needed 16 cups of strawberries. Each month after that, she reduced the amount of strawberries by a fourth. How much strawberries did she need for the jam on the fifth month?
Mr. Lee, a math teacher, has 20 students in his class. Each student brings 3 pencils and 2 erasers to class every day. How many pencils and erasers does Mr. Lee have in total on a given day?
The water tank at Thomas' swimming pool can hold 40000 liters of water. After filling it up from an empty tank, Thomas realizes that he has used 35% more water than he had expected. How many more liters of water did Thomas use than he had expected?
On a shopping trip to the mall, Emily buys three shirts at $8 each, and a pair of jeans at $20. She also buys a gift card worth $12. If Emily pays the cashier $68, how much change will she get?
Mark's dad is a carpenter and he has 14 boxes of nails. Each box has 6 packets of nails. Each packet has 24 nails. If Mark's dad has already used 36 nails, how many more does he have?
Julia's mom is baking a cake that requires 250 grams of flour. She has two packets of flour at home, one with 120 grams and the other with 75 grams. How many more grams of flour does Julia's mom need to buy to make the cake?
Emily writes essays for 3 hours daily. She decides to increase her writing time by 6 hours weekly. How many hours does Emily want to spend during one week on writing essays?
The town of Austin has 200 more people than Springfield. Springfield has 5 times as many people as Centerville. If Austin has 1500 people, how many people are there in Centerville?
Alex bought fifteen more video games than Samantha. If Samantha bought 20 video games, how many video games did they buy altogether?
Maria buys chocolates. She decides to buy them for her colleagues who got her a goodbye gift. She bought 12 chocolates for her colleagues who got her a goodbye gift and 10 chocolates for her friends. If each chocolate cost $3 how much did she spend on chocolates?
Tom is a car mechanic and has agreed to do some maintenance on his friend's car. The only material he has limited stock of is lubricant so he counts how many bottles he needs. Each bottle of lubricant will hold enough lubricant for 2 car maintenance tasks. Tom decides to bring 4 bottles of lubricant, each of which holds 3 bottles of lubricant, and this will be the exact amount he needs for all th…
To get his fill of chocolates, Benny has to eat at least three times as many chocolates as his sister does. If his sister eats 150 chocolates, how many chocolates do they eat altogether?
In a bookshelf where there are 300 books, there are 60 fiction books, 80 biographies and 40 cookbooks. How many reference books are there?
Alex is a carpenter and has agreed to build some shelves for his friend's room. The only wood he has limited stock of is mahogany so he counts how many planks he needs. Each plank of mahogany will hold enough wood for 2 shelves' worth, and this will be the exact amount he needs for the room's shelves. Alex decides to bring 8 bundles of mahogany, each of which holds 3 planks of mahogany, and this …
When Sam makes pizzas, he seasons it with a ratio of one part oregano to five parts mozzarella cheese, and he flavors it with one teaspoon of garlic for every three cups of mozzarella cheese. For every one teaspoon of garlic, he uses three olives. He used three cups of oregano in his latest pizza. How many olives did he use?
Lisa has four cats. Every year, her parents buy her one more, but two of them run away. How many cats will she have in four years?
Sarah is planning a camping trip with a group of friends. She has to set up a budget for food. She has calculated that each person needs at least $15 of food per day, and there are 7 people in the group. If the camping trip is for 5 days, what is the minimum amount of money Sarah should budget for food?
John is buying a basket of fruits. He picks 5 apples, 8 bananas, and 3 oranges. If each apple costs $0.80, each banana costs $0.50, and each orange costs $1.20, what is the total cost of the fruits?
The bookstore is giving a 10% discount on all books. If Samantha bought a book that originally costs $120, how much discount did she get?
Emily is making a quilt that consists of 12 rows of 15 squares each. Each square is 0.2 feet long. How many total feet of fabric will she need to make the quilt?
Alex has been saving money to buy a bike that costs $250. He has already saved 40% of the total amount. How much more money does Alex need to save?
Mr. Thompson has a collection of stamps. Originally, he had 250 stamps. After he went to a stamp collector's convention, he got 30 more stamps from Mrs. Johnson, 20 more stamps from Mr. Smith, and 40 stamps from his grandmother. How many stamps does Mr. Thompson have now?
Chef Emma needs 20 tablespoons of sugar for a cake recipe, 3 tablespoons more of flour, and 5 tablespoons less of milk. How many tablespoons of ingredients will Chef Emma need in total for the cake?
The school's bookstore sells 240 notebooks every week. Last week, the bookstore sold 20% more notebooks than usual. How many notebooks were sold last week?
Ms. Rodriguez's class has 25 students. 60% of the students have pets. Of those with pets, 80% have dogs. How many students in Ms. Rodriguez's class have dogs as pets?
What is the average cost per book if Susan bought 12 books for \$72 dollars?
Michael scored 50 more points than Sandra. If Sandra scored 120 points, how many points did they score together?
There are 20 flowers in a garden, 2 of the flowers are orchids and the rest are roses. If there are 5 red roses, how many yellow roses are there?
If there are 25 more cats than dogs in a neighborhood, and there are 15 dogs, how many animals are there altogether?
If Rod bought 3 times as many chips as Tom, and Tom bought 12 bags of chips, how many bags of chips did they buy altogether?
Sarah has 12 pens in her pencil case. Every week, her sister gives her 1 pen, but 2 of them break. How many pens will Sarah have in 6 weeks?
A bicycle shop sells 20 bicycles a month. In the first month, they sell 5 less. How many bicycles will the shop sell in 9 months?
Leo has 100 marbles in a jar. His neighbor gave him 3 more, and Leo bought 5 from a store. If Leo gave 2 marbles to his best friend, how many marbles does Leo have now?
Samantha walks her dog 5 miles a day. If she wants to walk her dog an additional 2 miles every week, how many miles will she walk her dog in 6 weeks?
Yolanda can eat 3 burgers in a sitting. Her friend Jose can eat 5 burgers in a sitting. If they decide to eat 2 more burgers each than usual, how many burgers will they eat in total?
Emily wants to buy a new bike that costs $120. She has already saved $40. She plans to mow lawns to earn more money. If she earns $15 for each lawn, how many lawns does she need to mow to buy the bike?
A bookshelf has 5 shelves, and each shelf can hold 8 books. If the bookshelf is currently empty, how many books can be placed on it in total?
A bakery is making a special batch of cookies for a holiday sale. They need to package 480 cookies into boxes that hold 12 cookies each. How many boxes will they need?
Tom can paint a room in 4 hours, and his brother Alex can paint the same room in 6 hours. If they work together, how many hours will it take them to paint the room?
A water tank can hold 2400 liters of water. If 1200 liters of water are already in the tank, how many more liters can be added?
Jenna harvested 1200 oranges from an orchard. She harvested 300 more oranges than Tom, who harvested oranges from another orchard. How many oranges did Tom harvest?
The distance between cities A and B is 180 miles. The distance between city A and city C is 240 miles. If a bus leaves city A and travels to cities B and C, what is the total distance traveled?
In a survey, it was found that 40% of the town's population has a pet dog, and 25% of the population has a pet cat. If the total population of the town is 5000, how many people have pets other than a cat or dog?
Olivia read 300 pages of a book in 5 days. She read the same number of pages each day. If she could read twice as fast, how many pages would she read in a day?
In a school, 120 students are studying history, and 90 students are studying geography. If the number of students studying history is 30 more than the students studying geography, how many students are there in total?
Natasha has been busy collecting stamps, and she has 300 more stamps than her sister. Her sister, on the other hand, has half the number of stamps her brother has. If her brother has 1200 stamps, how many stamps does Natasha have?
Gretel buys twice as many apples as Hansel, and together they buy 18 apples. How many apples does Gretel buy?
Tom is 15 years older than Alex. If the sum of their ages is 45, how old is Alex?
Max is twice as heavy as Sam, and Max weighs 30 pounds more than Emma. If Emma weighs 70 pounds, how much does Sam weigh?
Zoe has half as many marbles as Olivia, and Olivia has 10 marbles more than her brother. If the total number of marbles that Zoe, Olivia, and her brother have is 60, how many marbles does Zoe have?
Benny has 120 baseball cards. His friend Jessie has 40 baseball cards more than Benny. If Jessie shares 15 baseball cards with her friend, how many baseball cards do they have altogether?
Miami has one-quarter the number of residents as Chicago. If Chicago has 750000 residents, what is the total population of both cities?
Danny bought 18 more pens than Sarah. If Sarah bought 12 pens, how many pens did they buy in total?
Rachel had 30 bookmarks. At the library, she gave her sister 4 bookmarks. At lunchtime, Rachel's mom gave her a new pack with 8 bookmarks. Rachel's sister came back and gave Rachel three times as many bookmarks as she received at the library. How many bookmarks did Rachel end up with?
Michael sells 35 picture frames for $20 each. The materials cost $220. How much profit does he make?
A school is planning its annual festival. The planning committee estimated that 60% of the students will attend the festival. If there are 240 students in the school, how many students will not attend the festival?
Tom has a pet rabbit, Fluffy, that multiplies its body weight by 10% each month. If Fluffy originally weighed 15 pounds, what will be its weight after 5 months?
A fashion designer has 120 yards of silk fabric to make scarves. Each scarf requires 3 yards of fabric. How many scarves can the designer make in total?
A grocery store sells coffee beans in 5-pound bags. If the store sells 120 bags of coffee beans, how many pounds of coffee beans did the store sell in total?
Emma runs a bakery and is preparing treats for the upcoming fair. She has 20 boxes of cupcakes, and each box contains 24 cupcakes. At the same time, she has 15 crates of cookies, with 12 packs of cookies per crate, and each pack contains 6 cookies. If she needs 40 more cupcakes and 120 more cookies for the fair, how many more boxes of cupcakes and crates of cookies does she need to buy?
Hermione's frog collection consists of 24 big frogs, 14 small frogs, and 8 in-between sized frogs. Her frog friend, Ron, gave her 3 big frogs, 5 small frogs, and 1 in-between frog. If Hermione gave away 5 small frogs and 1 in-between frog to her friend, Ginny, what is the total number of frogs Hermione has now?
In the magical world of wizardry, Leon has 125 gold coins, and his sister, Saffron, has 75 gold coins. If they both received 20 more gold coins each as a gift and then exchanged coins, with Leon giving Saffron 15 coins, how many gold coins do they have in total now?
There are 250 students attending a school fair. On the first day, 75 students attended a magic show, and on the second day, 30 more students attended a puppet show. If 45 students did not attend either event, how many students attended both events?
On a camping trip, Harry packed 12 bags of marshmallows, with 8 marshmallows per bag. His friend, Neville, packed 18 bags of hot dogs, with 4 hot dogs per bag. If they both lost 2 bags of food on the way, and then Harry gave 2 bags of marshmallows to Neville, how many total bags of food do they have left?
Alexandra owns a small flower shop and has agreed to provide flowers for her friend's wedding. The only flowers she has limited stock of are sunflowers so she counts how many bouquets she needs. Each bouquet of sunflowers will hold enough sunflowers for 4 arrangements. Alexandra decides to bring 8 bunches of sunflowers, each of which holds 2 bouquets of sunflowers, and this will be the exact amou…
Sonya has a big collection of comic books. At first, her collection consisted of 250 comics. Her friends, knowing her hobby, decided to give her some comic books. Alex gave Sonya 5 more comic books than Emily. Mike gave Sonya 15 comic books, 3 more than Alex. Emily gave Sonya 7 comic books, 2 less than Rachel. How many comic books does Sonya have in total, after receiving all these gifts?
The city of Toronto has 500 more people than Ottawa. Ottawa has 3 times as many people as Guelph. If Toronto has 2500 people, how many people are there in Guelph?
Ryan is playing tennis, for 3 hours each day. He decided to increase his time spent on tennis weekly, by 6 hours. How much time does Ryan want to spend during one week on playing tennis?
Morgan started the day with 35 stickers. At breakfast, she gave away 2 stickers while playing. At lunchtime, she bought a new pack with 8 stickers. In the afternoon, Morgan's brother gave her 3 times as many stickers as she received at lunch. How many stickers did Morgan end the day with?
Mark has twice as many books in his bookshelf as his sister. His sister has half the number of books his father has. If the total number of books they have is 210, how many books does Mark's sister have?
A bakery sells cookies in packets of 8. On Monday, they sold 420 cookies. On Tuesday, they sold half that number. How many packets did they sell on Tuesday?
On a trip to the zoo, 48 children and 18 adults ride a train. If the train has 6 carriages and all are full, how many people are in each carriage?
Tom has three friends: Alex, Brian, and Chris. Alex borrowed 5 dollars from Tom, Brian borrowed 3 dollars, and Chris borrowed 2 dollars. If Tom had 12 dollars before they borrowed, how much money does Tom have left?
A dog eats 10 pounds of food per week. How many pounds of food will the dog eat in 6 weeks?
Jack is planning to cover the walls of his room with wallpaper. The room has 20 identical walls that need wallpaper. Each roll of wallpaper covers 4 walls. How many rolls will he need?
Ben is filling up the gas tank of his car. If the tank holds 14 gallons of gas and the pump can supply 2 gallons of gas per minute, how many minutes will it take to fill up the tank?
If Cathy has 360 apples in a basket and distributes them equally into 6 boxes, how many apples will there be in each box?
There are three brands of laptops: A, B, and C. Brand A contributes to 30% of all laptops sold, Brand B to 40%, and Brand C to 30%. If a total of 240 laptops were sold, how many laptops of Brand C were sold?
Emily has a recipe to make cookies that gives 3 dozen cookies. If she needs to triple the recipe, how many cookies will she eventually have?
Tom has 18 shirts in his closet. He adds 12 more shirts to his collection. If he gives 8 shirts away as gifts, how many shirts does Tom have left?
Alex is training for a marathon. She ran 16 miles on Monday, 20 miles on Tuesday, and 24 miles on Wednesday. If she ran 1/4th of the total miles on Thursday, how many miles did she run on Thursday?
A bakery sells 240 loaves of bread each day. They have 6 ovens and each oven produces the same amount of bread. If the bakery has to reduce production by 10%, how many loaves of bread will each oven produce per day?
Rachel has 40 stickers in her sticker book. She gives 8 stickers to her friend and buys 15 more stickers at the store. If she loses 3 stickers on the way home, how many stickers does Rachel have now?
Mark has 3 boxes of books in his attic. Each box has 8 shelves, and each shelf can hold 5 books. If Mark wants to add 2 more boxes of books, how many books can he hold in total?
At the town's annual festival, three booths sold a total of 1,200 balloons. If the first booth sold 200 fewer balloons than the second booth, and the third booth sold 500 more balloons than the second booth, how many balloons did the second booth sell?
Emily's family has a home garden with flowers. Every month, 1/4 of the flowers are removed to give to the neighbors, and another 15 flowers are planted. If there are currently 300 flowers in the garden, how many flowers will there be in 4 months?
Harriet is making costumes for her friends' party. She uses 3 meters of fabric for each costume. If she needs 9 more meters of fabric to complete the last costume and she already has 24 meters, how many costumes did she make?
Sam has been saving money in his piggy bank for a year. He has saved 1/5 of the money needed to buy a new bike. If he needs 100 dollars to buy the bike, how much money does he have now?
The local gym has a total of 300 members. They have a basketball team with 15 players, soccer team with 20 players, and tennis team with 25 players. If 5 members are on both the basketball and soccer teams, and 10 members are on both the soccer and tennis teams, how many members do not participate in any sports?
Ella's library has a total of 3500 books. After adding 200 new books every week for four weeks, how many books will Ella's library have now?
There are 365 days in a year. If Quarterback had a birthday last week, how many days has he celebrated his birthday so far this year?
Blinky's bed technologically adjusts to the user's comfort level. It has five different levels: very soft, soft, medium, firm, and very firm. If the average user has utilized the settings for 30 nights and spends 40% of nights on very soft, 20% on soft, 10% on medium, 10% on firm, and 20% on very firm, how many nights have users been sleeping on the very soft setting?
Ginger is getting her bike ready for a rally. She needs 10 more guests to reach the maximum of 25 guests. If each guest will be given 2 stickers and Ginger already has 10 stickers, how many stickers will Ginger need to buy to fully accommodate her guests?
Rufus has a collection of 2000 T-shirts. He adds 100 T-shirts to his collection every month and has 5 identical shirts of each type. After 4 months, how many unique types of T-shirts will Rufus have?
Alex works two jobs, job 1 and job 2. If he gets paid 30 dollars per hour for job 1 and 20 dollars per hour for job 2, how much will he earn in one week if he works 4 hours a day for job 1 and 3 hours a day for job 2?
There are five boxes in a storage room. Box 1 has 10 books, box 2 has twice as many books, box 3 has 10 more books than box 1, box 4 has 5 fewer books than box 3, and box 5 has one-half the number of books in box 4. How many books are there in all the boxes?
Sheri can paint a 15-foot wall in 3 hours. If she paints a wall that is 5 feet longer at the same rate, how many hours will it take to paint the new wall?
In a jar, there are 240 cookies. If 15% of the cookies are peanut butter, 25% are chocolate chip, and the remaining are oatmeal, what percentage of the cookies are oatmeal?
Karen spent 2/3 of her vacation in the city and 1/4 of her vacation on the beach. If her vacation is 20 days, how many days did she spend in the city and on the beach?
Alisa has 10 different colors of pencils in her box. She donates 2 red pencils to her brother. If she buys 4 blue pencils and loses 1 green pencil, how many different colors of pencils does Alisa have now?
Max has been practicing his shooting skills for the upcoming basketball game. He has made 7 out of 10 shots in the morning and 5 out of 8 shots in the evening. What is the total percentage of shots he has made?
Alex found a coupon that gives her 10% off on her favorite lipstick. The lipstick costs $20. Alex also has a $2 coupon to use. How much will Alex pay for the lipstick after applying both coupons?
Emma sells handmade jewelry online. She sells 5 pairs of earrings for $15 each and 2 necklaces for $50 each. How much profit does Emma make if she spent $200 to make the jewelry?
Tom has 25 chickens that lay 4 eggs each every day. If Tom sells the eggs at 50 cents per dozen, how much money does he make in a week?
Jenny wants to tile her 100 square feet kitchen floor with square tiles that cover 5 square feet each. How many tiles will Jenny need to buy if she needs a 20% extra to fit the corners?
Jack's favorite song is 5 minutes long and he wants to burn a CD with 10 songs with the same duration. If the CD holds 80 minutes of music, does Jack have enough space for all his songs?
Lisa wants to make cookies for a school bake sale. The recipe requires 3 cups of sugar and 2 cups of flour for every 12 cookies. If she wants to bake 48 cookies, how many cups of sugar will she need?
Alice drives 200 miles to visit her friend. If she drives half the distance with her friend in the car and then drives back alone, how many miles did she drive with her friend in the car?
Mark is planning to put up 12 shelves in his new bookcase. Each shelf will hold 8 books, and he has already collected 32 books for the shelves. Mark is adding 4 new books to his collection each week. How many weeks will it take for Mark to have enough books to fill all the shelves?
Rachel has already saved $200 for her summer vacation and expects to save $20 per week for the next 9 weeks. After those 9 weeks, Rachel will also receive $100 as a birthday gift. If the vacation costs $500, will Rachel have enough money to pay for it?
If there are 150 students in 5 classes and the number of students in each class is equal, how many students are in each class?
A pizza place sells three different sizes of pizzas. The small size sells for $10, the medium size sells for $15, and the large size sells for $20. If Sara buys two small pizzas, one medium pizza, and one large pizza, how much will she pay in total?
Alex has 120 stamps in her collection. She gives her brother 20 stamps, her sister 10 stamps, and her best friend 15 stamps. How many stamps does Alex have left?
Benny has four boxes of crayons. Every month, his mom buys him one more box, but he also loses one box. How many boxes of crayons will Benny have in eight months?
Andrew has 40 stickers, but he used to have more. Andrew gave his friend Emily 15 stickers, gave his brother Max three times that amount and gave his cousin Rachel twice the amount he currently has. How many stickers did Andrew start with?
In a candy store, there are 25 bags of candy on the top shelf and 15 bags of candy on the middle shelf. The top shelf has five times as many bags of candy as the bottom shelf. How many bags of candy are in the store altogether?
Carmen is making cookies for a bake sale. She needs to make at least three times as many cookies as her friend Sophia does. If Sophia makes 120 cookies, how many cookies do they make altogether?
The museum in New York has 200 more exhibits than the museum in Chicago. Chicago has 25% as many exhibits as the museum in Los Angeles. If New York has 800 exhibits, how many exhibits are there in Los Angeles?
On the farm, there are 30 horses and 45 birds. If there are 100 animals in total, how many cows are there?
Olivia is planning to organize a party and wants to have as many napkins as the guests. If there are 10 tables and each table will have 7 guests, how many napkins will Olivia buy?
Juwairiyah is collecting stamps for her birthday. Her sister gave her 15 more stamps than she already had, and her mom gave her 2 times the number of stamps her sister gave. If Juwairiyah initially had 30 stamps and now has 90 stamps, how many stamps did her mom give her?
A bakery in Saskatoon needs to package 4 times as many cookies as the Kelowna bakery. If the Kelowna bakery needs to package 1200 cookies, how many cookies does the Saskatoon bakery need to package?
Adam is currently 3 times older than his niece, and his niece is 2 times older than her brother. If the total age of Adam, his niece, and her brother is 84 years, then how old is Adam's niece's brother?
James has more books than his sister, Mary. Mary has 25 less books than his brother, John. If James has 50 more books than John, how many books does Mary have?
In the game of Monopoly, Sarah has 12 times as many $20 bills as she has $50 bills. If she has a total of $800, how many $20 bills does she have?
In a class of 40 students, there are 8 more boys than girls. If 10 students do not play soccer, and all boys play soccer, how many girls play soccer?
Lisa spent her entire allowance on stamps and envelopes. She bought stamps that cost $0.50 each and 10 envelopes for $5. She bought three times as many stamps as envelopes. How many stamps did Lisa buy?
A bakery sells two types of bread: white and whole wheat. They sell 150 loaves of white bread and 75 loaves of whole wheat bread per day. If they make a profit of $0.25 on each loaf of white bread and $0.50 on each loaf of whole wheat bread, how much profit do they make in a day?
James has 120 stickers. His friends give him some stickers. Emma gives him twice as many stickers as Jackson. Jack gives him 8 stickers, which is 3 more than Gary. Karen gives him 5 stickers, 1 less than Emma. How many stickers does James have now?
There are 24 cookies in a jar. If there are 2 rows of cookies, and each row has 3 trays, how many cookies are in each tray?
There are 360 books in a library. The number of fiction books is 40 more than the number of non-fiction books. If there are 200 fiction books, how many non-fiction books are there?
Sophia has a pet parrot. The parrot eats 15 seeds in the morning, 20 seeds in the afternoon and 25 seeds at night. How many seeds does the parrot eat in a day?
A bakery sells 560 loaves of bread. They sell 40 loaves more of white bread than whole wheat bread. If they sell 240 loaves of whole wheat bread, how many loaves of white bread do they sell?
Jim owns a bookstore, and it takes him 5 hours to catalogue 20 books. How many hours does it take him to catalogue 80 books?
A box contains 60 pencils. If 12 pencils are red, 15 are blue, and the rest are black, how many black pencils are there?
Ben and his family went to a restaurant. They ordered 3 pizzas with 12 slices each. They also ordered 2 salads that cost $5 each. If the pizzas cost $10 each, how much did Ben and his family spend on their meal in total?
There are 35 students in Mr. Johnson's class. On a field trip, 7 students took the bus, and 14 students drove with their parents. How many students did Mr. Johnson drive?
Casey's bookshelf can hold 12 books per row. If she has 4 rows with 10 books in each row already, how many more books can she add to her bookshelf?
Samantha can paint 10 walls per day. Her coworker Tom can paint 8 walls per day. How many walls will Samantha and Tom paint together in 5 days?
In a bag of candies, there are 120 candies. If Jenny takes 1/4 of the candies, how many candies does she take?
If a rectangular garden measures 20 yards by 30 yards, and a walkway that is 2 yards wide is built around the garden, what is the total area of the walkway?
Kayla is saving money for a bike. She saves $15 per week and she has already saved $100. How many more weeks does she need to save in order to have $200?
In a city, 30% of the population is children, 20% are teenagers, and the rest are adults. If there are 50,000 people in the city, how many people are adults?
Olivia needs to buy new shoes. She goes to a shoe sale where she can buy three pairs of shoes for $120. If she wants to buy 5 pairs of shoes, how much money does Olivia need in total?
Nova has a total of 12 windows and 4 doors on her house. If 4 windows are painted blue and 3 doors are painted red, what percentage of the total doors and windows are not painted?
Benny can make 12 sandwiches in 8 minutes. His sister, Emma, can make 15 sandwiches in 10 minutes. If they work together, how many sandwiches can they make in 12 minutes?
Miko's family is going on a road trip. They travel at an average speed of 48 miles per hour. If they travel for 7 hours and 30 minutes, how many miles will they have traveled when they stop for lunch?
Lucas has 300 marbles in a jar. He gives 20% of them to his brother and 25% to his sister. If Lucas then buys 50 more marbles, how many marbles does he have now?
Marisol can produce 200 chocolates in 5 hours, working at the same pace. How many chocolates can she produce in 2 hours?
David requires 5 hours to clean the whole house, and his sister Sophia requires 3 hours to clean the same house. If they work together, in how many hours will they clean the whole house?
The new Pizza Palace menu offers a 15% discount on all large pizzas. If a large pizza originally costs $25, how much will you need to pay after the discount?
Emily can read 3 books in 7 days. If she decides to increase her reading rate by 50%, how many books can she read in 7 days?
Alex can complete a puzzle in 12 hours, and his friend Rachel can complete the same puzzle in 9 hours. If they work together, how many hours will it take to complete the puzzle?
In a school choir, the ratio of boys to girls is 3:4, and the band has 64 students altogether. How many boys are there in the choir?
Michael is a professional skateboarder and has a skateboard ramp that he has to rent to skaters. He charges $35 per hour during weekdays and $50 per hour during weekends and public holidays. During the week, he rents it out for 3 hours a day and during the weekend he rents it out for 6 hours a day. How much money does Michael make in a week?
Peter is saving up to buy a new gaming laptop. The laptop costs $800. He already has $300 saved up. If he gets $40 every week as an allowance, how many weeks does he need to wait to buy the laptop?
A bakery sells 300 loaves of bread a day. On Monday, Tuesday and Wednesday they sell 20% of those at a discounted price of $1.20, whereas on the other days they sell at $2.40. What is the total revenue for the week?
Tina is a professional photographer. She was hired to take photos of a wedding. She took 400 photos, and for each photo she takes she makes $5. But the client decided that he only wants 120 photos from the wedding. How much money does Tina make from the wedding session?
Jackson's family owns a bakery which provides cupcakes and cookies to a nearby restaurant. They use 35 cups of sugar for the cupcakes and 20 cups of sugar for the cookies. If they need 100 cups of sugar in a week, how many batches of cupcakes and cookies can they make in a week?
Linguine's father is a road builder and builds roads for the city. He builds 4 km of road per day. The city needs a new road that spans 28 km. How many days will it take Linguine's father to build the new road?
Wendy has 240 books on her bookshelf. She donates 60 books to the library and buys twice that amount from the bookstore. What is the total number of books Wendy has now?
Jem has a pet rabbit named Whiskers who eats carrots and apples. Whiskers eats 5 carrots per day and half as many apples. If Whiskers eats 120 carrots per month, how many apples does Whiskers eat per month?
Marco's cousin runs a music school. The school has five classes of students and each class has 25 students. If Marco's cousin adds three more classes with the same number of students, what is the total number of students in the school?
Peter can cycle 15 kilometers an hour. His brother Mario can cycle 12 kilometers an hour. If they start in the same place and cycle in straight lines in opposite directions for 2 hours, how many kilometers apart do they end up?
Dr. Smith has an orange farm ready for harvest. She borrows Mr. Jones' truck and transports the harvest to the market, carrying 15 crates per trip, prepared for sale. If the oranges are in 20 kgs crates, and the truck makes 18 trips, what's the total weight of oranges harvested by Dr. Smith?
Maya is making a cake. She uses 40 pieces of strawberries for a cake, twice as many pieces of blueberries, and 15 more pieces of raspberries than strawberries. If there are 8 slices of cake, and everything was distributed evenly, how many pieces of fruits altogether are on each slice?
A poll conducted by the local newspaper showed that only 15% of the 600 residents agree to a new highway construction. How many residents disagree with the new highway construction?
In Ms. Brown's computer science class there are 60 students. Of those students, 60 percent have laptops. Of those who have laptops, 30% also have tablets. How many students have both laptops and tablets?
There are 24 pairs of socks in a basket. How many socks are there in the basket?
A bank teller starts the day with 400 euros. During the day, he received 30 deposits of 15 euros and 4 withdrawals of 25 euros. How much money does the teller have at the end of the day?
A bicycle manufacturer produces a batch of 120 bicycles every week. How many bicycles will the manufacturer produce in 4 weeks?
If 5 coupons are required to buy one toy, and Tim has 15 coupons, how many toys can he buy?
Maria bought 5 kilograms of oranges that cost 5 euros per kilogram. How much did Maria pay for the oranges?
Rick has 15 boxes of chocolates. He gives 3 boxes to his sister, 2 boxes to his brother, and 4 boxes to his friend. How many boxes of chocolates does Rick have left?
In a bakery, each baguette requires 2 cups of flour, 1/4 teaspoon of salt, and 1 tablespoon of sugar. How many tablespoons of sugar are needed for 12 baguettes?
In a pet store, there are 5 birds for every 3 cats, and 2 dogs for every bird. If there are 30 birds, how many cats are there in the store?
Tim is using an escalator. The escalator moves 30 feet per minute, and Tim walks 20 feet per minute. If the escalator is 180 feet long, how many minutes will it take for Tim to climb the escalator?
A library has 1200 books in total. 1/3 of the books are fiction, 1/4 are biography, and the rest are self-help books. How many self-help books are in the library?
Mike buys 30 wooden chairs for $10 each. The cost of riveting the chairs was $120. How much did he make in profit?
At the neighborhood theatre, half of the seats are filled. On the weekend, there are 25% more seats available, making a total of 125 seats occupied. How many seats does the theatre have?
Ava finds a web where the spider has placed its egg sac 4 feet above the center of the web. If the web has a radius of 7 feet, how many feet would the spider travel from the center to its egg sac?
Mr. Jenkins has 40 boxes of cereal and he donates 20% of them to a local food bank. If he donates 2 more boxes, what percentage of his cereal boxes did he donate in total?
On a popular video game, Jamy's player moves at a speed of 8 meters per 3 seconds. How many meters will it move in 12 seconds?
Rio has 3 backpacks filled with home decor items to be delivered to customers. Each backpack holds 2 boxes. Rio pulls out 5 boxes from the backpacks and puts them on a shelf, leaving the remaining boxes for delivery. How many items that are part of the home decor can be delivered to the customers, if each box holds 4 items?
The local farmer's market sells 350 dozen eggs each week. They pack eggs in cases that hold 2 dozen eggs each. The farm goes through 5 cases every day (except Sundays) and runs out of eggs every week. How many days does the farmer's market sell eggs in a week?
Alex's company needs to package 600 toys into boxes that can hold 20 toys each. The company has 30 boxes left over from last year's shipment that they can use. How many more boxes does Alex need to order?
Jagger's family is planning a road trip. The car's gas tank can hold 18 gallons of gas, but it's currently empty. Jagger's mom fills it up at the gas station, but then realizes she forgot to reset the odometer. The car gets 24 miles per gallon. How many miles will Jagger's family be able to travel before needing to refill the gas tank?
Ms. Patel has a set of 200 new books to put on the bookshelves. She wants to put 10 books on each shelf, but the shelves can only hold 8 rows. How many bookshelves does Ms. Patel need to buy?
Sam's two older siblings, Todd and Sue, are planning their family vacation. The hotel room rate costs twice as much as the cost of the rental car for one day, which is 50 dollars. If Todd and Sue decide to stay in the hotel room for 4 days, how much do they have to pay for the total hotel bill?
Lily has two pet snakes named Slinky and Slither. She feeds them twice as many mice as the number of days in the week. If she feeds them for 7 days, how many mice does she need in total?
Sammy is saving up for a new bike. It costs 240 dollars, which is 6 times what he has saved so far. How much money does Sammy have in his piggy bank?
Samantha is helping her friend Matthew pack boxes for his move. It takes 3 minutes to pack one box. If they worked for 2 hours, how many boxes did they pack in total?
Charlie is making a collage for his art project. He needs at least 5 times as many red buttons as the number of blue buttons. If he needs 15 blue buttons, how many red buttons does he need in total?
A bakery makes a special kind of cake that requires a ratio of two parts flour to three parts sugar. If they use 18 kilograms of flour, how many kilograms of sugar do they need?
A bookstore owner orders 12 boxes of books, with 15 books per box. If 20% of the books are fiction, how many fiction books does the bookstore owner have in total?
Patrick is a carpenter and needs to make 15 identical wooden tables. Each table requires 5 meters of wooden plank. If he has 75 meters of wooden plank, how many meters will he have left over after completing the tables?
In a school election, 35% of the 200 students voted for candidate A. If candidate B got 30 votes, how many votes did candidate C get?
A factory makes 240 toys per hour. If it operates for 8 hours, and each toy requires 2 kilograms of plastic, how many kilograms of plastic does the factory use in a day?
Mike is in charge of feeding a large group of birds. If he has 56 bags of seeds and each bag feeds 12 birds, how many birds can Mike feed in total?
A bakery is selling special bread baskets for a holiday. If they already sold 28 baskets, and they have 35 more on the shelves, how many baskets do they have in total if they started with 70 baskets?
If a car travels from New York to Chicago, it will travel nearly 790 miles. If it stops at Pittsburgh on the way, and Pittsburgh is 310 miles from New York, how many miles will it travel from Pittsburgh to Chicago?
4 people are splitting a bill at a restaurant. If the total cost is $120, and 3 people decide to tip 20% of the cost, how much will each person pay?
A farmer has 48 bales of hay in the barn. If he loses 12 bales in the flood, and then adds 15 more bales, how many bales will he have in total at the end?
Rachel is a zookeeper at the local zoo. She has 40 animals assigned to her care, but she has lost 8 of them. She also has 5 new animals assigned to her care everyday. How many animals will she have after 5 days?
Ethan wants to buy a new game that costs 180 dollars. His mom gave him 50 dollars last year and 2 times that amount this year. How much more does Ethan need to buy the game?
Emma wants to publish a book. The book has 200 pages. Emma’s editor suggested she remove 1/3 of the pages. After that, Emma realized she needs to remove 10% of the remaining pages. How many pages will Emma’s book have after the edit?
Olivia has 3 fishbowls and she wants to put an equal number of fish in each of them. She has 120 fish and her friend gave her 20 more fish. How many fish will Olivia put in each fishbowl?
Sarah runs a bakery and makes 30 pies a day. She gives away 5 pies a day to the poor. If Sarah needs to bake 25 pies a day to break even, how many pies will she have left after 10 days?
Chef William has 15 more pounds of apple than orange in his kitchen. He has 40 pounds of banana. The total weight of the three fruits is 115 pounds. How many pounds of orange does Chef William have?
Christopher is 3 years older than his brother. His brother's age is 1 more than twice Christopher's sister's age. If Christopher is 19 years old, how old is his sister?
In a school of 120 students, 3/5 of the students belong to the basketball team, and 2/5 of the students belong to the soccer team. 1/5 of the students belong to both teams. How many students belong to neither team?
Steve bought 36 books from a bookstore at $3 each. He also bought a bag at $12. During the sale, he obtained a discount of 10% on his entire purchase. How much did Steve pay after the discount?
A bookshelf has 7 shelves. Each shelf can hold 12 books. 3 shelves are already filled with science books, and 2 shelves are filled with fiction books. If the remaining shelves are filled with mathematics books, how many books are there in total?
The city of New York has 200 more people than Chicago. Chicago has 3 times as many people as Detroit. If New York has 2100 people, how many people are there in Detroit?
A restaurant offers for sale 120 pizzas and 150 burgers. Using all the food, how many meals containing 3 items each can he make?
David currently has 40 stamps, but he used to have more. David gave his brother 80 stamps, gave his sister twice that amount and gave his friend Alex four times the amount he currently has. How many stamps did David start with?
Rachel teaches 60 students a semester. How many students will Rachel teach in 8 semesters if in the first semester she only teaches 50 students?
Emily buys notebooks. She decides to buy them for people who got her anniversary and graduation presents. She sent 25 for anniversary gifts and 30 for graduation gifts. If each notebook cost $3 how much did she spend on notebooks?
Luna has 4 more books than Ava, and Ava has 3 times as many books as Emily. If Luna has 28 books, how many books does Emily have?
The town of Greenfield has 200 more people than Springfield, and Springfield has 3 times as many people as Oakdale. If Greenfield has 1000 people, how many people are there in Oakdale?
Captain Jack's pirate ship has 70 crew members. One quarter of them are from the Caribbean, and one sixth are from Spain. The rest are from England. How many crew members are from England?
Sam has to save at least 3 times as much money as Ben does. If Ben saves $200, how much money do they save altogether?
In the city of Willowdale, there are 150 houses, and 1/3 of them are located in the south. 50 houses are located in the east. How many houses are located in the north and west?
Jim has three daughters who are all picking apples in an orchard. The eldest daughter picks apples at a rate that is one-third slower than the rate of the middle daughter. The youngest daughter picks apples at a rate that is twice as fast as the middle daughter. If the eldest daughter picks 20 apples in one hour, how many apples will the youngest daughter pick in 3 hours?
Peter runs a bakery, and he specializes in making different types of bread. He has a bag of flour that contains a mixture of white flour and whole wheat flour. The ratio of white flour to whole wheat flour is 3:2. If there are 150 kilograms of flour in the bag, how many kilograms of white flour are there?
A car dealership has a total of 350 cars on the lot. 35% of the cars are foreign, and the rest are domestic. What is the ratio of foreign to domestic cars?
Mark has been saving money for a new bike and has $420 in his piggy bank. He wants to buy a bike that costs $540. If he can save $25 per week, how many weeks will it take him to have enough money to buy the bike?
A bookshelf has 5 shelves, and each shelf can hold 8 books. If the bookshelf is currently empty, how many books can be placed on it in total?
Emily started the day with 30 stickers. At recess, she gave her friend 4 stickers. At lunchtime, she traded 5 stickers for a pencil. After lunch, Emily's teacher gave her a prize of 8 stickers. Emily's best friend came back and gave her 3 times as many stickers as she received at recess. How many stickers did Emily end the day with?
Lola began her collection of bunny figurines with 75 bunnies. Her grandma, knowing her love for bunnies, decided to give her some bunnies. Grandpa gave Lola 1/3 as many bunnies as Grandma. Mom gave Lola 5 bunnies, 2 more than her dad. Auntie gave Lola 7 bunnies, 1 less than her uncle. How many bunny figurines does Lola have in total, after receiving all these gifts?
Benny had 4 hamsters. Every month, his parents buy him one more, but one of them gets sick and passes away. How many hamsters will he have in seven months?
Sophia is practicing piano, for 3 hours each day. She decided to increase her time spent on practicing piano weekly, by 6 hours. How much time does Sophia want to spend during one week on practicing piano?
Nina started her day with 28 pennies in her piggy bank. At breakfast, she added 7 pennies that she found under her couch. At lunchtime, she gave her best friend 3 pennies as a gift. In the afternoon, her grandpa gave her a dollar bill, which she exchanged for 100 pennies. How many pennies does Nina have at the end of the day?
John has been saving money for a new bike and so far has 180 dollars in his piggy bank. He needs 240 dollars to buy the bike. If he earns 12 dollars a week working at his part-time job, how many weeks does John need to work to buy the bike?
A math teacher at a high school has to grade 360 tests. The teacher can grade 12 tests in 20 minutes. How many minutes will it take for the teacher to grade all the tests?
Rachel wants to buy a new video game that costs 48 dollars. She has 30 dollars in her pocket. Her mom offers to give her some money as a gift. If Rachel's mom gives her 4 dollars more than 3 times the money Rachel has in her pocket, will Rachel have enough money to buy the video game?
A basketball player, Alex, has scored an average of 24 points per game in 7 games. If Alex scores 30 points in the next game, what will be his new average score per game?
In a school of 120 students, 60 students take math, 50 take science, and 20 take both math and science. How many students take neither math nor science?
Terrence runs a small boutique and needs to package his products. He has 6 boxes of 14 items each. If he has 12 extra items, how many total items does he have to package?
Sophia is an avid reader and read 15 books last quarter and 20 books the quarter before. If she plans to read 5 more books each quarter, how many books will she read in the next 3 quarters?
Gavin is a farmer and needs to irrigate his crops. He has 12 pipes that can fill 25 tanks of 30 gallons each. How many gallons of water can Gavin's pipes supply in total?
Emily is planning a party and needs to prepare 4 quiches of 8 slices each. If she wants to have 12 leftover slices, how many slices of quiche will she have in total?
Julia has a small bakery and sells 2 dozen baguettes and 3 dozen croissants. If she wants to increase production by 50%, how many baguettes and croissants will she need to bake in total?
Wendy drives her car 12 miles in one hour. If she drives for 4 hours, how many more miles would she have driven if she drove for 7 hours?
In a library, 24 books are added every week to the fiction section. If 18 books are removed from the fiction section every week, how many books are added in total to the fiction section weekly?
Aya has been saving $10 each week for the past 8 weeks. If she continues to save this amount for the next 12 weeks, how much money will Aya have in total in 20 weeks?
Jamila's mother baked cookies for a party. She made 18 rows of cookies with 12 cookies in each row. If she gave 6 cookies to the party, how many cookies did Jamila's mother have left?
Ryan harvested 15 apples from his tree and his friend gave him 9 more apples. If he shared 6 apples with his sister, how many apples does Ryan have left?
John has 27 dogs. He also has some cats. If the ratio of dogs to cats is 3 to 5, how many cats does John have?
Adam has 12 bags of apples, and each bag contains 15 apples. His sister Emma gives him 20 bags of oranges, and each bag contains twice the apples. How many bags does Adam have in total?
In a store, shirts cost $8, pants cost $12, and socks cost $3. If you buy 2 shirts, 3 pants, and 4 socks, how much do you need to pay in total?
Marissa can walk 10 miles an hour. Her brother Chris can walk 6 miles an hour. If Marissa walks for 4 hours and Chris walks for 5 hours, how many miles apart do they end up?
There are 180 pencils in a box. 30 pencils are orange, 50 are red, and the remaining is yellow. How many yellow pencils are there?
Alex is trying to save up money to buy a new bike. He saves up $15 every week. How many weeks will it take Alex to save up $300?
At Mr. Johnson's bookstore, $25 percent of the science books are about physics and 30 percent of those are hardcover books. If there are 120 physics books, how many hardcover physics books are there?
Rachel writes 3 articles every day. She writes every day for 28 days. How many articles will Rachel write in 56 days?
In a famous bakery, they make 480 cupcakes every week. Out of those, 240 are chocolate cupcakes. In the last week of the month, they decide to make 25% more cupcakes. How many chocolate cupcakes will they make in the last week of the month?
Olivia has 20 boxes of crayons. She loses 8 boxes in her messy room. Then, she finds 5 more boxes in her attic. How many boxes of crayons does Olivia have now?
A bakery is having a sale on bread. Every loaf of white bread costs $2, every loaf of whole wheat bread costs $3, and every baguette costs $4. How much do you need to pay for two loaves of white bread, three loaves of whole wheat bread, and two baguettes?
A pet store has a total of 150 animals, including dogs, cats, and birds. If there are 50 dogs and 30 cats, how many birds are there?
When making cookies, Rachel uses a ratio of two parts sugar to three parts flour, and she adds one teaspoon of chocolate chips for every four teaspoons of sugar. If she uses three cups of flour, how many teaspoons of chocolate chips does she use?
A movie theater has 15 rows of seats, with 20 seats in each row. If 12 rows are fully occupied and 30 seats in the remaining rows are empty, how many people are in the theater?
A bookshelf has five shelves, and each shelf can hold eight books. If the bookshelf is currently empty, and 32 books are placed on it, how many more books can be placed on the bookshelf?
Sara is a successful businesswoman who started her company with 120 employees. With the growth of her company, she increased her employees by 25% each year for the next three years. How many employees does Sara have after three years?
Alex is a skilled carpenter who needs 18 pieces of wood to build a bookshelf. Using a jigsaw, he cuts all the wood from a tree that has 360 inches of usable wood. If each piece of wood requires 20 inches of wood, how many bookshelves can Alex make from that wood?
In a school with 400 students, 30% of students take physics and 20% of students take chemistry. If 15% of students take both physics and chemistry, how many students take either physics or chemistry or both?
Brian has been saving money for a new bike and has $270. A bike that he wants costs $300. If he earns 15% of the cost of the bike each week, how many weeks will it take Brian to save enough to buy the bike?
A coffee shop sells two types of coffee beans: Arabica and Robusta. In a mixture of 400 kg of coffee beans, 60% is Arabica and the rest is Robusta. If the shop wants to add Robusta beans to make the mixture 40% Arabica, how many kilograms of Robusta beans must be added?
Benny collects stamps from different countries. If he has 125 stamps from Japan, 125 stamps from France, 75 stamps from Germany and the rest are from United States, and he has a total of 300 stamps. How many stamps are from the United States?
A bookstore has 12 shelves, each with 15 books on it. The manager wants to put 2 more books on each shelf. How many books will the bookstore have after restocking?
Mark's average score on his three math quizzes is 75 points. If his first two quizzes averaged 65 points, what did he score on his third quiz?
Ellen has 20 stamps of each denomination, $1, $2, $5, and $10. She bought a card worth $120. How many stamps will she need to use to buy the card?
The school soccer team scored 15 goals in the last 3 games. How many goals did the team score per game on average?
In a bookshelf with 120 books, there are 30 biographies, 40 novels, and some textbooks. How many textbooks are there?
A bakery sells 240 loaves of bread per day. If 3/5 of the loaves are whole wheat, how many whole wheat loaves are sold per day?
A car travels 250 miles in 5 hours. How many miles will it travel in 8 hours at the same speed?
A vendor sells 15 boxes of pencils for $20 each. The vendor buys the pencils for $10 per box. How much profit does the vendor make?
A rectangular garden measures 30 meters by 20 meters. If a path that is 2 meters wide is built around the garden, what is the area of the path?
Laura has a collection of 250 comic books. She starts to lend some of them to her cousin. On the first day, she lent out 20 comic books. On the second day, she lent out 15 more than the first day. On the third day, she lent out twice as many as the second day. How many comic books does Laura have left after the three days?
The school is having an art fair. The first art group will be displaying paintings on 30 easels. The second art group will be displaying paintings on 15 more easels than the first group. The third art group will be displaying paintings on 5 less easels than the second group. How many easels will the three art groups use in total?
A hiker can climb 4 miles an hour. Her friend can climb 6 miles an hour. If they start at the same place and climb in opposite directions for 2 hours, how many miles apart do they end up?
A class of 25 students went on a field trip. The bus company gave them a special discount of 20% off the original fare. How much did each student pay if the original fare was $5?
Tom decided to save money by using a strategy. On the first week, he saved $20. On the second week, he saved $5 more than the first week. On the third week, he saved 3 times as much as the second week. How much did Tom save in total after 3 weeks?
In a basket, there are 12 apples, 8 bananas, and 15 oranges. If 4 apples and 5 bananas are eaten, how many fruits are left in the basket?
Mark can ride a bike at a speed of 15 miles per hour. How far will he ride a bike in 5 hours?
If a pizza parlor charges $15 for a large pizza and $8 for a small pizza, how much will it cost for 3 large and 4 small pizzas?
Kathy has 18 bags in her closet. She wants to put 6 bags on each shelf. How many shelves will she need for all the bags?
David reads 12 books in 4 months. How many books will he read in 12 months at the same rate?
Jane has 18 stickers. Every day, she gives away 2 stickers to a friend. How many days will it take for her to give away 36 stickers?
Samantha bought 15 bags of seeds for $30 each. She spent a total of $500, including $60 on other gardening materials. How much profit does Samantha make on each bag of seeds?
In a certain school, there are 300 students. There are 120 boys in the sixth grade and 75 girls in the fifth grade. How many students are not in the sixth or fifth grade?
Every month, Bill's savings increases by $50. If Bill has saved $300 after 7 months, how much did Bill have in savings at the start?
Alex's family has 12 cats and dogs. They have 4 more dogs than cats. How many cats does Alex's family have?
Danielle makes candles. She sells them for $5 each. She buys wax for $3 per pound and uses 3 pounds per candle. How much profit does she make if she sells 8 candles?
Aditya has 10 balls in his backpack. Then, he takes out 4 balls, gives 2 balls to his cousin, and buys 6 more balls at the store. How many balls does Aditya have in total now?
Karen's rabbit has 5 babies. The next week, 2 more babies are born. 4 weeks later, 3 babies die. Then, Karen finds 4 more rabbits. How many rabbits does Karen have now?
A bookshelf has 5 shelves, and each shelf can hold 8 books. If the bookshelf is currently empty, how many books can be placed on it in total?
Emily has 12 stickers on her laptop. Her grandma gives her 10 more stickers. She buys 5 stickers at the store, but accidentally loses 3 stickers. How many stickers does Emily have now?
Caleb has 45 boxes of books in his library, and he wants to put them on shelves with 5 boxes on each shelf. How many shelves will he need to buy to hold all the books?
Emmanuel is a skilled carpenter who built a simple birdhouse. The roof of the birdhouse is shaped like a triangle, and the area of the roof is 40 square inches. If the base of the triangular roof is 10 inches, what is the height of the roof?
At a local farm, there are 500 feet of fencing used to enclose an area. If the fenced area is a rectangle with a length 5 times the width, what is the width of the enclosed area?
A foot doctor wants to order new office chairs, and the supplier sells them in sets of 4 chairs. If the doctor has 18 offices and wants to have 3 chairs in each office, how many sets of chairs does the doctor need to order?
Maeve has 3 siblings and they all want to share some money equally. If they want to divide $270 among themselves, how much money will each sibling get?
In an art competition, there are 30 paintings. Winners are awarded 10 points for each top prize, 5 points for each runner-up prize, and 2 points for each third place prize. If there are 4 top prizes, 6 runner-up prizes, and 10 third place prizes awarded, what is the total number of points given out to all winners?
A farmer grows 500 tomato plants in his backyard. He wants to harvest them in 20 days, which means he needs to harvest 25 plants a day. How many tomato plants will he still have after the first 10 days of harvesting?
In a school of 250 students, the ratio of boys to girls is 3:2. If there are 15 teachers who are males, what is the total number of males in the school?
In a snail racing competition, there are five different tracks, each with a different number of snails. Track 1 has 5 snails, track 2 has 7 snails, track 3 has 10 snails, track 4 has 12 snails, and track 5 has 8 snails. What is the total number of snails participating in the competition?
Emily has 250 stamps in her stamp collection. She receives 5 new stamps every month from her overseas pen pals. How many months will it take for her to reach 300 stamps?
Mark is planning a birthday party for his friend. He is making a big cake that requires 3 times the number of guests to have enough slices. If there are 25 guests coming, how many extra cakes will Mark need to bake assuming a standard cake serves 8 people?
A car rental company has a total of 200 vehicles in their fleet. They have 30 electric, 60 diesel, and some gasoline-powered vehicles. What percentage of the fleet is composed of gasoline-powered vehicles?
A bookshelf has 5 shelves, and each shelf can hold 8 books. If the bookshelf is currently empty, how many books can be placed on it in total?
A supermarket is having a sale on eggs. They are offering 15% off their usual price of $2.40 per dozen. How much will you pay for 2 dozen eggs during the sale?
John is planning a road trip from City A to City B. The total distance is 480 km, and John has already driven 240 km. What percentage of the trip has John completed so far?
Lucy is preparing a cookie sale at the school event. Every tray has 24 cookies. If she has 12 trays, how many cookies are there in total for the sale?
Christopher brings bags of potato chips to his friend's picnic party. If each bag contains 8 servings, and he brings 15 bags, how many servings does he bring in total?
Marc has been asked to provide 12,000 eggs for a catering event. He packs them in boxes of 400 eggs. How many boxes does he need?
Ruby has been asked to coordinate logistics for a charity event. There are 500 attendees and each attendee will be given 2 bottles of water. If she orders 1,000 bottles of water, how many bottles will be left over?
Conroy buys chickens for his backyard farm. He buys 6 packages of chickens, each package having 4 chickens. How many chickens does Conroy buy in total?
There are 24 books on a shelf, 12 of which are romance novels. If the number of science fiction books is 3 less than the number of romance novels, how many books are not romance or science fiction?
Gary's bike went 15 miles per hour during a ride. If he rode his bike for 4 hours and 30 minutes, how many miles did he go?
There are 150 students at a college. Of these students, 25 are senior and 35 are junior. The rest of the students are evenly divided among the freshman and sophomore classes. How many students are in the freshman class?
Sarah bought 10 more pounds of hamburger than her brother John. If Sarah has 25 pounds of hamburger, how many pounds did they buy in total?
A farm has 250 animals total, consisting of dogs, pigs, and chickens. If there are 50 more pigs than dogs, and 10 more chickens than pigs, how many dogs are there?
A bookstore owner has to pack books of different pages into boxes for shipping. If the owner packs 5 boxes with 20 books in each, and each book has 300 pages, how many pages of books are packed in total?
At the end of a sale, Emma has 350 shoes left. She had 15% more shoes at the beginning of the sale. If she sold twice as many shoes as she still had, how many shoes did Emma have at the beginning of the sale?
Mark finished his homework in 45 minutes. His friend Alex finishes his homework in 30 minutes less than Mark. If Alex finishes his homework 3 times a day, how many minutes does Alex spend on homework daily?
Olivia took a trip to Paris, where she walked 5 miles a day for 14 days. Her sister, Sophia, walked 2 miles a day more than Olivia for 28 days. How many miles did Sophia walk in total?
During a flu outbreak, the health department distributed 1200 bottles of medicine. They distributed 30% more bottles in districts with schools. How many bottles did they distribute in districts with schools?
Sarah is making a smoothie. She uses 40 berries for a smoothie. Twice as many bananas and 15 more apples than berries. If there are 4 smoothies, and everything was distributed evenly, how many fruits altogether are in each smoothie?
In a stack of 600 books on a shelf, 30% are biographies. One-tenth of these biographies are written about historical figures. Assuming these proportions are exactly correct, how many historical biographies are on the shelf?
A bakery produces 60 loaves of bread per day. They donate one-fifth of these loaves to the local food bank. How many loaves of bread are left if they produce for 7 days?
To play the guitar, Mark has to practice at least three times as much as his sister Emma does. If Emma practices 240 minutes, how many minutes do they practice altogether?
Rodrigo runs for 4 hours, burning 40 calories every hour. How many more calories would he have lost if he would have run for eight hours?
Alex loves to read books. If he reads 20 pages each day, and there are 15 days in the school vacations, how many pages does he read in total during the school vacations?
Carla and friends are planning a trip to the beach. They want to share the cost of gas equally. If the cost of gas is $120 and there are 8 people going, how much will each person pay?
Jack has a pet lizard. He feeds it 250 crickets in a week, and the lizard eats twice as many mealworms as crickets. If there are 7 days in a week, how many mealworms does Jack's lizard eat per day?
Sophia is saving money to buy a bike. She has $250 saved already, which is $50 more than her brother, and her sister has half as much money as Sophia. How much does Sophia's sister have?
Nathan has 10 pet dogs. He buys 5 more each year and gives up 2. How many dogs will he have in eight years?
Maria owns 400 orange and 600 apple trees. If she wants to plant an equal number of orange and apple trees, how many apple trees does she need to remove?
Downtown city has 300,000 residents. Uptown has 20% more residents, and Midtown has 15% more residents than Uptown. How many residents does Midtown have?
Peter's car needs 12 liters of gasoline to travel from one city to another. The car can also use biofuel, which is 30% more efficient than gasoline. How much biofuel will the car use for the same trip?
Irena has 5 Facebook friends. Every week, she adds 2 more friends, but one of them deletes her. How many friends will she have in 20 weeks?
At a local bakery, Maria made 45 cakes which require 15 minutes of preparation time each. If she worked 3 hours a day, how many more hours will she need to prepare all the cakes?
A group of 15 students went to a restaurant, where each meal cost $12. If they left a 20% tip, how much did the total bill come to?
A car travels from the city of Apple at 40 mph and it took 3 hours to reach City of Banana. How many miles is City of Banana from City of Apple?
Olivia planted 140 roses, and 3 out of 5 did not bloom. How many roses did not bloom?
If 24 cookies require 3 cups of sugar, how many cups of sugar are required for 96 cookies?
Cici is a master baker and runs a small bakery downtown. She makes wedding cakes and each cake requires 12 cups of sugar. Cici needs to make 8 wedding cakes for an upcoming wedding. If she has a bag of sugar that weighs 3 pounds and each pound weighs 2 cups of sugar, how many bags of sugar will she need to buy?
Alistair is a tour guide and takes a group of tourists to visit a famous landmark. If the group consists of 12 men, 8 women, and 4 children, how many people is Alistair leading if 1/4 of the men and 1/2 of the women are couples?
Sam is a manager at a bookstore and orders 200 copies of a bestselling novel. He has to display them on shelves that hold 4 books each. How many shelves will Sam need to buy to display all the books if the bookstore already has 20 shelves available?
Daphne is a farmer and has a field of 300 apple trees. Each tree yields 15 baskets of apples. If one-fifth of the apple trees were badly damaged by a storm, how many baskets of apples will Daphne harvest this season?
Benny is the owner of a gym and has to order new exercise machines. He needs to buy 12 treadmills and each treadmill costs 3 times as much as a stationary bike. If Benny has $15,000 to spend on equipment and each stationary bike costs $1,000, will he have enough money to buy all the machines he needs?
A bakery owner produces 120 loaves of bread daily. How many packs of bread will he be able to make with 3 loaves in each pack?
In a school, 40% of students play soccer, 30% play basketball, and 20% play tennis. If 120 students play soccer, how many students are there in the school?
A bookshelf has 5 shelves, and each shelf can hold 8 books. If 2 of the shelves are empty, how many books can the bookshelf hold in total?
A farmer harvested 240 pounds of apples from an apple tree. If 60 pounds of apples are rotten, how many pounds of apples can be used to make juice?
A bicycle chain has 64 links, and every 8 links form a cycle. How many cycles are there in the bicycle chain?
Samuel's aunt sells handmade crafts at the local market. She prepared 24 batches of wooden birds, with 9 pieces per batch. If she sold 3/4 of the total wooden birds, how many wooden birds did she sell?
Roderick drove his car for 5 hours at 50 miles per hour. After taking a 1-hour break, he drove for another 3 hours. How many miles did Roderick travel in total?
Samantha has 12 jars of homemade jam. She decided to give 2 jars to her grandmother and 3 jars to her neighbor. If she then buys 7 more jars of jam, how many jars does Samantha have now?
Alexis has been saving money for a new bike and has 200 dollars. She spent 3/5 of her savings on a new helmet and then her grandmother gave her 50 dollars as a gift. How much money does Alexis have now?
The local bakery makes 120 loaves of bread daily. They package 6 loaves per bag and then ship them to the grocery store. How many bags of bread does the bakery ship daily?
A company has 4 computers, each with 5 hard drives. If 3 computers have 6 gigabytes of storage in each hard drive and 1 computer has 8 gigabytes of storage in each hard drive, what is the total storage capacity of the hard drives in the computers?
At the local animal shelter, there are 14 cats and 21 dogs. If 7 cats and 3 dogs got adopted, what is the ratio of cats to dogs left at the shelter?
A bookshelf has 5 shelves, each with 7 books. If 2 more shelves with 7 books each are added, how many books are there now on the bookshelf?
A bakery has 12 baskets of bread, with 15 loaves of bread in each basket. If they bake 3 more baskets with 15 loaves of bread each, how many loaves of bread are there in total?
Two friends, Alex and Ben, have a total of 56 stamps in their stamp collections. If Alex has 8 more stamps than Ben, how many stamps does Alex have?
Lola and Karl are equally far from the Capital, but they live on different sides of the Capital. Lola drove for 4 hours at 30 mph and Karl drove for 5 hours at 25 mph. How many miles apart are Lola and Karl now?
A snail is at the bottom of a 20-foot well. Each day, it climbs up 3 feet, but at night, it slips back 2 feet. How many days will it take for the snail to reach the top of the well?
If Sam can mow 2/3 of the lawn in 4 hours, how long will it take him to mow the entire lawn?
Bill, Chris, and Dave together have 180 marbles. Chris has 20 more marbles than Bill, Dave has 40 less marbles than Chris. How many marbles does Dave have?
Candace spends 1/3 of her income on rent, 1/5 of her income on food, and the rest on other necessities. If she makes $1200 each month, how much does she spend on other necessities?
Out of 50 cats in a shelter, 30% are kittens. If the shelter receives 20 more cats, and 6 of the new cats are kittens, what percentage of the new total of cats are kittens?
Mark has 15 trees in his orchard. He planted 5 more trees each year for 4 years. If 3 of the trees died in the 4th year, how many trees does Mark have now?
A bakery sells 200 loaves of bread per day. They want to increase their sales by 40%. How many loaves of bread will they need to sell to reach their new goal?
The local library has 1000 books, and 40% of these books are fiction. If the library receives a donation of 200 books, and 30% of the donation is fiction, what percentage of the total books is fiction now?
David is training for a marathon. He runs 12 miles on Monday, 15 miles on Tuesday, and 10 miles on Wednesday. If he wants to increase his average miles per day by 20%, how many miles will he need to run on Thursday?
Mr. Smith owns 12 plants and wants to plant 3 more in each of the 4 corners of his garden. How many plants will he have in total?
If there are 12 boys and 9 girls in a class, and 2 more girls join the class, what is the ratio of girls to boys?
Michael can run 250 yards in 5 minutes. How many yards can he run in 7 minutes?
If Betsy gets 50% more pears than apples and has 15 apples, how many pears does she have?
In a group of 20 students, 8 students are wearing glasses. What percentage of students are wearing glasses?
Tim is making a trail mix. He mixes 80 M&M's, twice as many almonds as M&M's, and 10 more cashews than almonds. If there are 8 servings of the trail mix, how many pieces altogether are in each serving?
Samantha rents a bike shop. She charges $15 for a mountain bike and $12 for a road bike. If Samantha rented 10 mountain bikes and 15 road bikes on a sunny Saturday, how much money did she earn?
A bookstore orders fiction and non-fiction books from two publishers. Alex publisher sends 120 fiction and 100 non-fiction books. Ben publisher sends 2/3 as many fiction books as Alex publisher and 20 more non-fiction books than Alex. How many books did the bookstore receive in total?
A group of five friends, Alex, Ben, Charlie, Diana, and Emily, went to a restaurant for dinner. The total bill was $60. If Alex paid 20% of the bill, and Ben paid 2/5 as much as Alex, how much did the rest of the friends have to pay together?
A factory produces 90 toys per hour. If the factory operates 12 hours a day, and there are 5 factory workers, how many toys does each worker make per day?
After going to the library 3 times, Sophia read 12 books, and she wants to read 36 books. How many more times does she need to go to the library to reach her goal if she reads the same number of books every time?
A bakery sells croissants at $2 each, muffins at $3 each, and cookies at $1 each. Sara bought 10 croissants, 5 muffins, and 2 cookies. How much did she spend in total?
Luke's scores in a math test were 70, 90, 85, 95, and 80. What is the average score of the math test?
Ashley bought a new laptop for $1,500 and a smartphone for $300. If she paid 10% tax on the laptop and 8% tax on the smartphone, what is the total amount she paid for the two items?
A car traveled from city A to city B at an average speed of 60 miles per hour. On the return trip, the car traveled at an average speed of 75 miles per hour. What was the average speed for the round trip?
Alex buys presents for his friends. He decides to buy them for people who got him birthday and New year presents. He sent 25 for birthday gifts and 10 for New year gifts. If each gift cost $5, how much did he spend on gifts?
Eva wants to raise money for a school trip. She is selling stickers for $3. She is also selling bookmarks for $5. She wants to raise $400. She only had 20 stickers that she sold out. How many bookmarks does Eva need to sell to reach her goal?
Emma collects books. At first, her collection consisted of 180 books. Her friends, knowing her hobby, decided to give her some books. Her best friend Sarah gave Emma twice as many books as Emily. Rachel gave Emma 12 books, 2 less than Emily. Julia gave Emma 9 books, 1 more than Emily. How many books does Emma have in total, after receiving all these gifts?
When Sophia makes cookies, she sweetens it with a ratio of one part sugar to three parts butter, and she flavors it with one teaspoon of cinnamon for every three cups of butter. For every one teaspoon of cinnamon, she uses three eggs. She used three cups of sugar in her latest cookies. How many eggs did she use?
Maya's mother has a fruit farm ready for harvest. She borrows Mr. Smith's truck and transports the harvest to their store, carrying 12 baskets per trip, prepared for sale. If the fruits are in 30 kgs baskets, and the truck makes 25 trips, what's the total weight of fruits harvested by Maya's mother?
Sarah collected 15 stickers per day. How many stickers would she have at the end of the week if she continues to collect stickers at this rate?
A bakery made 20 apple pies yesterday. Each pies required 0.5 cups of sugar. How much sugar did they use to make the pies?
A college spent an equal amount of money on transportation and housing. If they spent $2500 on transportation, how much did they spend in total on both expenses?
Every day Alice reads 10 pages of a book. If the book has a total of 200 pages, in how many days will she finish reading it?
The length of a rectangular garden is 2 meters more than its width. If the width of the garden is 5 meters, how many square meters are there in the garden?
In Ms. Jones' English class there are 25 students. Of those students, 60 percent have visited Disneyland. Of those who have visited Disneyland, 20% also have been to California Adventure. How many students have been to both Disneyland and California Adventure?
Margo can knit 70 hats in a month. Her grandmother can knit twice as many hats as Margo. Her aunt can knit 35 hats, 10 more than Margo's best friend. How many hats can Margo, her grandmother, and her aunt knit in a month combined?
Lucy plays piano for 3 hours each day. She decided to increase her time spent on playing piano daily, by 1 hour. How much time does Lucy want to spend during one day on playing piano?
Swimming for 3 hours, Emily gained 20 dollars every hour. How many more dollars would she have gained if she would have swum for seven hours?
Hannah had a collection of 50 stickers, but she used to have more. Hannah gave her brother 10 stickers, gave her sister half that amount and gave her friend Olivia five times the amount she currently has. How many stickers did Hannah start with?
In a competition, 60% of the contestants got a prize. Of those who got a prize, 20% won a gold medal. If there were 96 contestants, how many gold medals were given out?
If 12% of the books on a shelf are on the top shelf and there are 120 books total, how many books are on the top shelf?
Karen has 8 more pairs of shoes than her sister. If her sister has 12 pairs of shoes, how many pairs of shoes do they have altogether?
A company has 80 employees, of which 60% are female. Of the female employees, 25% are in the marketing department. How many female employees are in the marketing department?
Mark has 40 stamps from Asia and 15 more stamps from Europe than from Asia. If he gives 10 stamps to his brother, how many stamps does Mark have left?
In a circus performance, Twinny the clown can throw 12 balls per minute. How many balls will she throw if she performs for 5 minutes?
Fred can paint a wall in 4 hours, Bob can paint the same wall in 3 hours. How long will it take for them to paint the wall together?
If a basketball team scored 40 points each game, and they played 10 games, how many points did they score in total if they scored 20 points more in the first game?
Christina can make 24 cookies in 2 hours. How many cookies can she make in 6 hours if she can bake 4 more cookies each hour?
Helen needs 15 minutes to cook a steak, and Tom needs 20 minutes to cook a steak. If they are cooking steaks together, how many steaks can they cook in 1 hour?
In a basket of 200 apples, 15% are red and one quarter of these are rotten. Assuming these proportions are exactly correct, how many apples in the basket are both red and rotten?
Simone rides her bike as a form of exercise. She can ride 60 kilometers with one trip in the city known as "the downtown ride." In an exercise known as "the mountain ride," she can ride twice the distance that she can ride in the downtown ride. Her favorite exercise is known as "the beach ride" and she can ride 5 times the distance that she can ride in the mountain ride. How many kilometers, in t…
In a store, there is a sale of furniture. Every table costs $20, every chair $15, and a sofa $80. How much do you need to pay for five tables, three sofas, and seven chairs?
When Ron makes donuts, he flavors them with a ratio of one part nuts to five parts sugar, and he adds one teaspoon of chocolate for every three cups of sugar. For every one teaspoon of chocolate, he uses two cups of milk. He used three cups of nuts in his latest donuts. How many cups of milk did he use?
Sarah has been saving for an iPod that costs 150 dollars. She has saved 25 dollars every month from her part-time job. How many months will it take her to save enough money to buy the iPod?
Emily's favorite hobbies are reading and collecting dolls. Her bookshelf at home contains 5 times as many books as her friend Julia's bookshelf. If Julia has 12 books, how many books does Emily have?
David owns 2 gardens. In the first garden, he has 15 roses, and in the second garden, he has 25 more roses than in the first garden. If he wants to put 5 roses in each basket, how many baskets can he fill?
A carpet in a new house has an area of 260 square meters. If a rectangle of dimensions 10 meters by 4 meters is to be cut from the carpet, what will be the area of the remaining carpet?
A game costs 120 dollars. If you had a 20% discount coupon, how much will you have to pay for the game after applying the discount?
Tom has some coffee beans in a bucket that he wants to package in bags of 5 beans each. If he has 90 coffee beans, how many bags can he fill?
A group of friends want to share some pizzas. If they have 3 large pizzas each cut into 12 slices, and there are 8 people sharing the pizzas, how many slices will each person get?
Sarah has a basket of apples. She gives 1/4 of them to her brother. Then, she gives 1/5 of the remaining apples to her sister. If she started with 80 apples, how many apples does Sarah have left?
A local zoo has a special exhibit featuring a certain species of bird. The zoo currently has 35 birds of this species. They plan to acquire 12 more birds from another zoo. If they already have 5 times as many birds of this species as they do giraffes, how many giraffes does the zoo have?
Amanda has a collection of stamps from around the world. She has 15 books of stamps, each containing 20 pages. If each page can hold 10 stamps, how many stamps can Amanda hold in total?
Anthony is a chef, and his in charge of preparing fruit salad for a large event. He needs 15 apples for every 20 oranges and 5 bananas for every 2 apples. How many total pieces of fruit will he need if he wants to make 12 salad servings?
For her art project, Jill needs some materials. A bag of clay costs $8, a bottle of paint costs $5, and a roll of canvas costs $12. If she buys 3 bags of clay, 2 bottles of paint, and a roll of canvas, how much does she spend in total?
Emily loves reading and has read 4 more books than the last year, when she read 25 books. Her friend Lisa read 17 books less than Emily. How many books did Emily read in total over the last two years?
A snail named Sam is stuck in the shell. He has 9 shells, and each has 12 snails. How many snails are there in total?
Mrs. Johnson's bakery sells special occasion cakes at a fixed price. She sold 17 birthday cakes, 12 wedding cakes, and 7 anniversary cakes. If the total revenue from cake sales is $540, what is the price of each cake?
In a container of 750 eggs, 30% are colored blue and one-half of these are large eggs. Assuming these proportions are exactly correct, how many eggs in the container are both blue and large?
Olivia has 15 boxes of crayons. Each box contains 25 crayons. How much will Olivia pay for the crayons if each box costs $5?
Jake has 20 stickers. At school, he gave his friend 4 stickers. For lunch, his mom bought him 6 new stickers. In the afternoon, Jake's friend came back and gave him ten times the stickers he had given away earlier. How many stickers does Jake have now?
Olivia's mom baked 200 cookies. Olivia ate 15% of the cookies, her brother ate 20%, and her sister ate 10% of the remaining cookies. How many cookies are left?
A library has 500 books on its shelves. If in the first year it receives 20 new books, and in the following years it receives 5 new books every year, how many books will the library have in 10 years?
Louise wanted to invite her friends to a party. She invited 2 times more than the number of friends Tommy has, and Tommy has 3 friends more than Dave has. If Dave has 5 friends, how many friends did Louise invite in total?
Sam made $120 from his part-time job last week. He wants to save 30% of it for the summer vacation. How much money did Sam save last week?
Rachel got a gift card of $50 from her grandmother. She bought shoes that cost $20 and a dress that cost 3 times more. How much money is left on her gift card?
Vincent has 35 books in his bookshelf. He decided to add 2 times more books than Alec has. Alec has 5 books more than Daniel has. If Daniel has 10 books, how many books will Vincent have in his bookshelf after adding new ones?
Emily and Alex went to a coffee shop. Emily bought 2 lattes, and Alex bought 1 latte and 2 cappuccinos. Each latte costs $3, and each cappuccino costs $2. If Emily has $10 and Alex has $8, do they both have enough money to pay for their drinks?
Frank is a veterinarian, who earns about 20% commission on the sale of pet supplies. If Frank sells 60 supplies and earns $120 in commission, how much were the supplies worth?
Robert buys 3 bags of chips every week and wants to calculate the total cost. Each bag of chips costs $0.5 and Robert is aware that he will buy bags every week for the next 5 months, with 4 weeks in a month. If Robert decides to spend no more than $20 each month, how many bags of chips can he afford each week?
Jose is an event organizer who prepares 25 packets of materials for an event. Each packet of materials has 5 booklets, and Jose has a total of 3000 booklets. If he prepares equal packets of materials for each event, how many events can Jose prepare the materials for?
Elizabeth is a secretary and types 50 letters per hour. If she works for 8 hours a day and does not take any breaks, how many letters will she type in a 5-day week?
Patrick buys 20 boxes of cereal at $10 per box. If he decides to return 4 boxes to the store, and gets a full refund, what was the total amount Patrick paid initially?
John has a small collection of stamps. He has 30 stamps that are from Asia, which is 15% of the total collection. How many stamps are in his collection?
Rachel's favorite bakery sells 120 loaves of bread daily, which accounts for 60% of the total daily sales. If the bakery makes a profit of $1 on each loaf, how much does it make in a day?
There are 50 students in a class. The teacher gives 25% of the students a pop quiz. After the quiz, the students had an average score of 70%. How many students got above 70% in the quiz?
A company manufactures 200 units of a product daily, which is 40% of its total production capacity. If it operates 300 days in a year, how many units can it produce in a year?
The average monthly salary of five employees is $4500. If two employees earn $3500 and $4800, respectively, what is the average monthly salary of the remaining three employees?
Rachel bought a certain number of bags of apples. She gave 15 bags to her friends and 8 bags to her family. If each bag contained 12 apples, how many apples does Rachel have left if she started with 426 apples?
Tom has 12 boxes of crayons. In each box, he has 24 crayons. He also has 18 markers. If he wants to put them all in a bag that can hold 3 items per bag, how many bags does he need?
350 students are going on a field trip. The buses can hold 45 students each. How many buses do they need if each bus must be full?
Alex and his brother, Ben, have 72 marbles to share. If Alex has 24 more marbles than Ben, how many marbles does Ben have?
Katie has 150 stickers in her collection. She wants to give an equal number of stickers to her 5 friends. How many stickers will each friend get?
At Mary's bakery, a cake with just frosting cost $10. If adding cookies to the cake adds 50% to the price, how much will it cost to add cookies to 12 cakes?
Sharon has 12 charms in her collection. If she adds 2 charms each week, how many charms will she have in three weeks?
If 150 kilograms of cargo are going to be split evenly between 5 airplanes, how much will each airplane carry?
When walking to school, Lena took 30 minutes walking to the bus stop. The bus ride took 45 minutes. If the walk from the bus stop to her school took twice as much time as walking to the bus stop, how long did the entire trip take?
Jamal had 6 bags of oranges. Each bag contained 8 oranges. How many oranges did he have in total if he gave 2 oranges to his friend?
Bob has 5 boxes of crayons. His friend Steve has 2 boxes more than Bob. If each box has 12 crayons, how many crayons do they have altogether?
In a school, 37 chairs are arranged in such a way that 5 chairs are arranged in one row. How many rows can be arranged from these chairs?
If it takes 2 hours to walk 10 miles, how many miles can be walked in 6 hours?
Paul has a dog that eats 2 pounds of food every week. How many pounds of food does Paul's dog eat in 7 weeks?
In a library, there are 70 books on a shelf. 15 more books are added to it. How many books are there on the shelf now?
If Martin can read 30 pages in one hour, how many pages can he read in 5 hours?
Angela bought 5 more books than Sarah. If Sarah bought 12 books, how many books did they buy altogether?
If a train travels 120 miles in 2 hours, how many miles can it travel in 5 hours?
A bakery sells 240 loaves of bread per day. If they sell 15 loaves of bread per batch, how many batches do they sell per day?
Olivia has 50 marbles and Susan has 30 marbles. If they share their marbles equally among 10 children, how many marbles do each child get?
Mark can read 8 pages an hour. His sister Emma can read 12 pages an hour. If they start reading at the same time and Mark reads for 4 hours and Emma reads for 3 hours, how many more pages did Emma read?
Rachel had 24 cookies to package for the school bake sale. If she decides to put 2 cookies per package, how many packages can she make?
A swim team from California consists of 60 swimmers, and a swim team from New York consists of 30 swimmers. If 20 swimmers from California and 15 swimmers from New York are planning to participate in an upcoming swim meet, what is the total number of swimmers participating in the swim meet?
If 4 identical boxes weigh 24 pounds together, how much does one box weigh?
Allie has a rectangular garden that has an area of 36 square meters. If the length of the garden is 6 meters, what is the width of the garden?
Sarah spends 3 hours reading books every day. If she has read 270 books in 180 days, how many more days would she need to read to reach her goal of 500 books at the same daily rate?
In a jar of 800 jelly beans, 10% are blue, 15% are green, and 50% are yellow. Assuming these proportions are exactly correct, how many jelly beans in the jar are neither blue nor green?
Samuel can type 70 words per minute. If he types for 3 hours and 30 minutes, how many words will he have typed?
Mark has 18 shirts and buys 6 new shirts every month for 5 months. How many shirts will Mark have in 5 months?
Running for 4 hours, Rachel burnt 40 calories every hour. How many more calories would she have lost if she would have run for eight hours?
In a certain library, the fiction section has 50% more books than the non-fiction section. If the non-fiction section has 180 books, how many books does the fiction section have?
A local bakery is selling a bundle of 5 loaves of bread for 20 dollars. If they have 4 bundles, how much money did they make in total?
Olivia can eat 3 cookies per minute and her brother Carlos can eat 4 cookies per minute. If they eat for 5 minutes, how many cookies did they eat in total?
A bookshelf has 5 shelves, and each shelf can hold 3 rows of books. If each row can hold 4 books, how many books can the bookshelf hold in total?
A certain school has 15 more teachers than its neighbor school. If its neighbor school has 12 teachers, how many teachers does the other school have?
Jessica can wash dishes 4 times as fast as her friend Madison. If Madison takes 12 minutes to wash a batch of dishes, how long does it take them to wash 3 batches together?
Tim rolls 7 balls in a row at the bowling alley. If Sara rolled 3 more balls than Tim, how many balls did they roll altogether?
A bag of apples weighs 18 pounds. If another bag filled with bananas is 3 times heavier, how much does the banana bag weigh?
In 4 hours, Sammy can type 12 pages. His brother Jamie can type 20 pages in 5 hours. If they work together, how many pages will they have typed in 7 hours?
Sarah writes 20 pages a day. How many pages will Sarah write if she takes 4 days off in a month, and a month has 30 days?
A pair of shoes originally costs $80, but has been discounted by 15%. If Samantha buys three pairs, how much will she pay in total?
A bookshelf has 5 shelves, and each shelf can hold 8 books. If the bookshelf is currently empty, how many books can be placed on it in total?
If a factory can produce 1200 toys in 4 hours, how many toys can it produce in 10 hours if it works at the same rate?
A hotel has 15 floors, and each floor has 20 rooms. If 12 rooms on each floor are occupied, how many rooms are occupied in total?
Mark is taking a trip to Paris, which requires a 12 hour flight from New York. If the plane flies at an average speed of 600 miles per hour, how many miles will Mark travel during his flight?
Mrs. Thompson has 12 bags of apples. Each bag contains 4 apples that are either red or green. If 3 bags contain only green apples, and each of these bags has 2 wormy apples, how many wormy apples does Mrs. Thompson have in total?
In a test of 30 students, 20 got an A, and in a second test of 30 students, 15 got an A. In all the two tests, how many students got an A at least once?
Sarah decided to give away her book collection to her 4 friends. She gave each of them 15 books and still had 21 books left. How many books did Sarah have initially in her collection?
Tom is comparing the price of a TV to its original price of 1,200 dollars. The TV is currently discounted by 20%. If Tom has a coupon that gives him an additional discount of 15% of the discounted price, what will be the final price of the TV after applying the coupon?
Mark has 15 boxes of crayons and he gave 5 boxes each to his friends, Ben and Isaac. Then, he gave his sister Emma 3 times the amount he gave to each of his friends. How many boxes of crayons did Mark have to start with?
Lucy bought 50 stickers and Rachel bought 25 stickers less than Lucy. If Lucy and Rachel combined their stickers and wanted to share them equally among 5 people, how many stickers would each person get?
Peter traveled 50 miles more than his sister, Claire, who traveled 30 miles less than their brother, Ethan. If Ethan traveled 100 miles, how many miles did Peter, Claire, and Ethan travel altogether?
There are 30 students in Mrs. Patel's class. Each student drank 3 cups of water, and Mrs. Patel drank twice as much as each student. If the school has 50 cups of water left, how many cups of water did they have originally?
Eli can bench press 75 pounds. His brother can bench press 10 pounds more than Eli, and his sister can bench press twice as much as his brother. How much can Eli's sister bench press?
Alex built a bookshelf with 8 shelves, each shelf having 10 books on it. If Alex had 50 books left over, how many books did Alex originally have?
There are 3 birds sitting on a branch. Suddenly, 4 more birds come to sit on the same branch. If 2 birds flew away, what is the total number of birds now on the branch?
A bottle of juice has a capacity of 2 liters. If 1 liter of juice was taken out, and then half a liter more was added back, how much juice is in the bottle now?
Ethan can ride his bike 12 miles in 2 hours. If he continues at the same pace, how many miles will he ride in 5 hours?
Mia wants to save up $250 for a new bike by saving $15 every week. How many weeks will it take Mia to reach her goal?
Caleb has 18 pencils in his pencil case. He gave 2 pencils to his brother and received 4 pencils from his sister. How many pencils does Caleb have now?
A bakery has 48 cupcakes to be packed in boxes of 6 cupcakes each. How many boxes can the bakery fill with cupcakes?
Lily can run 8 kilometers in 1 hour. If she runs for 3 hours, how many kilometers will she have run in total?
A book costs $25. If Samantha buys 2 books and pays 10% tax, how much will she pay in total?
Carlos has 120 stickers in his sticker book. He gave 15 stickers to his friend and then received 25 new stickers as a gift. How many stickers does Carlos have now?
Michael has 32 dogs. He decided to take them for a walk and divided them into rows of 4 dogs each. How many rows can he make?
Sarah has $550 in her bank account. She withdraws $50 per week for the next 11 weeks. How much money does she have left after 11 weeks?
A bakery made 150 cakes in a day. They packed them into boxes of 5 cakes each. How many boxes can they make?
David can paint a house in 6 hours, and his brother Alex can paint the same house in 4 hours. If they work together, how many hours will it take them to paint the house?
A book has 204 pages. If the book is divided into 12 chapters, how many pages are in each chapter?
Alex has been saving up money for a new bike. She has been saving $125 per month for 7 months. Her grandma gave her $350 as a gift. She also found $75 on the street. How much money does Alex have now to buy her new bike?
A local farmer is harvesting apples from his orchard. He picked 270 apples from the northern part of the orchard, which is three-fourths of all the apples in the entire orchard. How many apples are there in the entire orchard?
A bookshelf has five shelves, and each shelf can hold eight rows of books. If each row can hold seven books, how many books can the bookshelf hold in total?
A group of friends want to go on a road trip that covers a distance of 1200 miles. If they can drive 200 miles per day, how many days will it take them to complete their road trip?
In a school, there are 250 students, and 120 of them are boys. Out of the girls, there are 20 more students in Grade 10 than in Grade 9. If there are 30 students in Grade 9, how many girls are in Grade 10?
Mark built a fence around his backyard. The west side of the fence is 30 meters long, the north side is 20 meters long, the east side is 15 meters longer than the west side, and the south side is 5 meters longer than the north side. How many meters of fencing did Mark use in total?
A water tank can hold 1200 liters of water. 3/5 of the tank is filled with water. How many more liters of water are needed to fill the tank?
Katy planted 48 apple trees in her orchard. She planted 8 more trees every week for 4 weeks. How many trees does Katy have in her orchard now?
At a restaurant, a spaghetti dish costs $15 and a pizza costs $8 more than the spaghetti. If a customer orders 2 pizzas and 3 spaghetti dishes, how much will the customer pay in total?
A bookshelf has 12 shelves, and each shelf can hold 8 books. If the bookshelf is currently empty, how many books can you place on it in total?
Ann has 1500 buttons in her collection. She gives away one fifth of them to her friend. How many buttons does Ann have now?
Mike earned $180 in four days. How much money did he earn per day?
Amy had 900 books in her library. She added 2/3 of that to her collection. How many books does Amy have now?
There are 3000 students in a school. If 1/10 of these students are not attending today, how many students are attending?
The radius of a circle is 5 cm. What is the area of the circle if π is 3.14?
Eighty percent of the students in a school were present on the day of the math test. If there are 1200 students in the school, how many were absent?
Every hour, Peter reads 30 pages of his book. If he reads 10 hours a day and there are 7 days in a week, how many pages does he read in a week?
Olivia has invested $3000 in the stock market. She makes a 15% profit per year and she invests the profit again. After 2 years, how much money will she have?
Rachel planted 120 flowers in her garden. On the first day, 10 of them died. On the second day, 1/4 of the remaining flowers died. How many flowers are left on the second day?
Ava bought 320 pencils and she gave 40 to her brother. Then she gave 1/5 of the remaining pencils to her sister. How many pencils does Ava have left?
A water treatment plant purifies 120 gallons of water per hour. Using this amount of purified water, how many bottles of 4-gallon capacity can be filled in a day?
Hannah invested a certain amount of money in a savings account that yielded 18% interest annually. After 2 years, she had $2,764. How much money did Hannah initially invest?
A bookshelf has 5 shelves, and each shelf can hold 8 books. If the bookshelf is currently empty, how many books can be placed on it in total?
A farmer harvests 210 apples from his orchard. He gives 15% of the apples to his neighbor and sells 60 apples at the market. How many apples does the farmer have left?
A bakery produces 480 muffins per day. They package the muffins in batches of 12. How many batches of muffins does the bakery produce per day?
Benny stores his 15 stickers in a jar which holds 5 stickers per layer. How many layers of stickers are in the jar?
If Jane buys three candies at 75 cents each and pays with a 5-dollar bill, what should she get back as change?
Jimmy collected 12 seashells from the beach. He decided to place the shells into baskets that can hold 4 shells each. How many baskets can Jimmy fill with his seashells?
Maria is saving for her new bike which costs 180 dollars. She saves 12 dollars each week. How many more weeks will Maria need to reach her goal?
The bell rang 3 times to signal the start of school. After the first bell, Emma and her friends counted 15 students, 25 more students arrived after the second bell, and another 30 students after the third bell. How many students arrived after the bell rang?
Carlos collects badges. He started with 80 badges. Then he received 3 times more badges from his grandma than the uncle. Mum gave him 5 more badges than the grandma. The uncle gave him 7 badges. How many badges does Carlos have now?
A local animal shelter took care of 25 dogs, 15 cats and 30 rabbits. If 15% of the dogs, 40% of the cats and 50% of the rabbits were adopted, what is the total number of animals not adopted?
A bakery sells a total of 480 buns. How many boxes with 8 buns each can they make?
Jack is currently 3 years older than Sam. After 5 years, Jack will be twice as old as Sam will be then. What is their current age difference?
A fruit stand offers for sale 120 red apples and 40 oranges. How many bags containing 5 fruits each can they make using all the fruits?
The city of Vancouver has 1500 more people than Seattle. Seattle has 3 times as many people as Portland. If Vancouver has 5000 people, how many people are there in Portland?
A toy factory produces 120 toys per day. The factory produces toys for 7 days a week and operates for 5 weeks a month. How many toys are produced in a month?
Robert currently has 40 pens, but he used to have more. Robert gave his brother 80 pens, gave his sister twice that amount and gave his friend Sarah five times the amount he currently has. How many pens did Robert start with?
A bakery offers for sale 120 loaves of bread and 180 pastries. Using all the baked goods, how many boxes containing 6 items each can they make?
Mark teaches 25 students a quarter. How many students will Mark teach in 4 quarters if in the first quarter he only teaches 20 students?
The local bakery is making 300 apple pies for a town festival. They need 20 apples for each pie and they already have 4,000 apples. How many more apples do they need to buy?
There are 64 students in Mrs. Rodriguez's Spanish class. 24 students are taking both Spanish and French, while 16 students are taking only French. How many students are taking only Spanish?
Jimmy has 28 pairs of socks in his drawer. If he wants to put the socks into boxes of 4 socks each, how many boxes can he make with the socks he has?
There are 150 books on a bookshelf, including 60 hardcover books and the rest are paperbacks. If 1/4 of the hardcover books and 1/2 of the paperbacks are fiction, how many fiction books are there?
Tom has 75 silver coins in his pocket. He gives 5 coins to his friend Sarah and 10 coins to his brother Alex. If he then finds 25 more coins on the street, how many coins does Tom have now?
Tom is making a decorated cake for his wife's birthday. The cake is shaped like a circle. He is making cherry decorations that will fit along the circumference of the circle. If the diameter of the cake is 18 inches, how many cherry decorations will Tom need if each cherry will occupy about 3 inches of circumference?
Will is part of a club that has 150 members. The club has three groups: reading group, sports group, and art group. The number of members in the reading group is 20 more than the number of members in the sports group, and the number of members in the sports group is 5 times the number of members in the art group. How many members are in the art group?
There are 120 books on a shelf. If 30% of the books are fiction and the rest are non-fiction, how many books are non-fiction?
James can paint a room in 4 hours and his brother, John, can paint the same room in 5 hours. If they work together, how long will it take to paint the room?
There are 50 cars on a parking lot. 3/5 of the cars are red, and the rest are blue. If 20% of the blue cars are from Toyota, how many Toyota cars are there in the parking lot?
Alex is collecting baseball cards. He has 20 cards in his collection today. He buys a pack of 5 cards at lunchtime and trades 3 cards with his friend. If his friend gives him 7 cards, how many cards does Alex have in his collection now?
A bookshelf has five shelves, and each shelf can hold eight books. If the bookshelf is currently empty, how many books can be placed on it?
Jessie wants to buy a bike that costs $240. She already has $120 and earns $10 per week. How many weeks will it take Jessie to save enough money to buy the bike?
Ryan wants to put together a picture frame for his mom's birthday. He needs a frame that has 16 corners, 16 sides, and 4 edges. If he buys a single frame that has 4 corners, 4 sides, and 1 edge, how many frames does he need to buy?
Baking a cake requires a ratio of two parts sugar to three parts flour, and two teaspoons of baking powder for every three cups of flour. If you use 6 cups of flour, how many teaspoons of baking powder do you need?
A bank account has $250 in it. 20% of the money is withdrawn. How much money remains in the account?
A snail is at the bottom of a 20 foot well. Each day, it climbs up 3 feet, but at night, it slips back 2 feet. How many days will it take for the snail to reach the top of the well?
Rami bought 25% more apples than Sara. If Sara bought 30 apples, how many apples did they buy altogether?
A library has 10 shelves, each containing 18 books. Using all the books, how many booklets containing 3 books each can be made?
Max's mom has a bakery ready for delivery. She borrows Mr. Smith's van and transports the delivery to their shop, carrying 12 boxes per trip, prepared for sale. If the bakery goods are in 20 kgs boxes, and the van makes 15 trips, what's the total weight of bakery goods delivered by Max's mom?
Joey is twice as old as his sister, and his sister is three times as old as Joey's daughter. If the sum of their ages is 120 years, then how many years old is Joey's daughter?
In a major city, there are 35% more civilians than police officers. If there are 10,000 police officers, how many civilians are there in the city?
Julia needs to buy printer paper for her class. The package says each printer paper has 250 sheets. If each student needs 12 sheets, and there are 30 students in Julia's class, how many packages of printer paper does Julia need to buy?
In a bakery, every cake requires 300 grams of sugar. If the bakery needs to make 14 cakes, how many kilograms of sugar do they need in total?
David is planning a trip to the mountains. He estimates that he will need 5 hours to drive to the base of the mountain and then 2 additional hours to climb to the top. If he needs to return the same day, how many hours will David spend driving and climbing the mountain?
Emily is an event manager and has agreements to set up tables for a conference. She has five boxes of tables, with each box containing 10 tables. Each table holds four chairs, and she needs to set up chairs for 480 people. Will she have enough chairs?
The library has 350 novels on a shelf. If 40% of the novels are sold and 25% of the remaining novels are given away, how many novels will the library have left?
David and Michael are having a party and order pizzas. They get four boxes of pizzas, with 12 slices per pizza and three pizzas in each box. If they need to serve 72 guests, will they have enough pizzas?
Olivia is planning a music festival and needs to set up a big stage. The stage needs 50 boxes of cables, each containing 20 meters of cable. If she has 90 boxes of cables, will she have enough to set up the stage?
Dr. Brown needs to prepare medication for his patients. Each dose of medication requires 0.5 grams of a special powder. If he prepares 300 doses, how many grams of the powder will he need?
Tom is trying to pave a path that leads to his home. He needs to buy gravel for the path. He wants to pave the path with a thickness of 2 inches. If gravel is sold by the square yard and covers a 2-inch thick surface of 9 square feet. The path is 30 feet long and 3 feet wide. How many square yards of gravel will Tom need to buy?
Ms. Anderson has a dog walking business. She charges $15 for a 30-minute walk. She charges $20 for a 45-minute walk. How much more does she charge per hour for the 45-minute walk?
For a school play, the stage crew has to set up 15 chairs in each of 20 rows. However, they later find out that they need to set up 5 more chairs in each row. How many chairs will the stage crew set up in total?
The new highway under construction is 42 miles long. 20 miles of the highway has already been completed. The construction team works at a rate of 3 miles per day. How many days will it take to finish the highway?
Tina's_design class has 16 students. The students have to design a blueprint for a new office building. If the designing process takes 9 days, and each student has to make a design that takes 2.5 hours to finish, how many hours will the students spend designing in total?
At a bakery, there are three types of cakes: chocolate, vanilla, and red velvet. Each chocolate cake costs $10, each vanilla cake $8, and each red velvet cake $12. How much do you need to pay for five chocolate cakes, three vanilla cakes, and two red velvet cakes?
Sophia has been saving money for a year. After that, she had $120 in her piggy bank. At the end of the second year, she had $200, and at the end of the third year, she had $320. How much money did Sophia save in the third year?
Jane wants to organize her collection of DVDs. She has DVDs of three movies: thriller, comedy, and romance. She has 20 thriller DVDs, 30 comedy DVDs, and 15 romance DVDs. How many DVDs does Jane have in total?
Tom has been walking his dog every day for two weeks. He has been walking 2 miles each day. If a week has 7 days, how many miles has Tom walked in two weeks?
A water bottle can hold 3 liters of water. If a container can hold 4 times the water of the water bottle, how many liters of water can the container hold?
Oscar has been collecting stamps for years. If he has 2500 stamps in total, and 15% of them were sent to him by his pen pal from China, how many stamps were sent by his pen pal?
A car dealership is offering a deal on a new model. For every ten cars sold, they will give one free. If they have sold 76 cars already, how many free cars will they give?
A total of 95 books are shelved in a library. If 2/5 of them are fiction books and the rest are non-fiction, how many non-fiction books are there?
If David would be able to make a profit of 15 dollars for every two bicycles he sells, how much profit will he get if he sells 70 bicycles?
In a bakery, 3/4 of the cookies were chocolate and the rest were oatmeal raisin. If there are 120 cookies in total, how many oatmeal raisin cookies are there?
Three friends, Maria, David, and Rachel, went to a movie theater and spent $45 on tickets. Maria paid one-third of the ticket price, David paid one-fourth, and the remainder was paid by Rachel. How much did Rachel pay?
Sam is baking a cake that requires 2/3 cup of sugar. If he only has 1/6 cup of sugar, how much more sugar does he need to add?
In a library, there are 200 books, 120 of which are fiction. If 30 books are added, and 20 of them are fiction, what percentage of the total books are fiction now?
An object is travelling at a speed of 48 km/h. If it travels for 2.5 hours, how many kilometers does it travel?
There are 125 students in a school, and 45 of them are in the chess club. If 20 more students join the club, what percentage of the total students are in the chess club now?
Asha is planning a road trip that covers a distance of 480 miles. She plans to drive for 4 hours each day. If she can drive 60 miles per hour, how many days will the trip take?
Alex has 21 boxes of pencils. Each box contains 9 pencils. How many pencils does Alex have in total?
The local baseball team played 25 games in the first quarter of the season. They won 5 fewer games than they lost. How many games did they win?
Jane has $120 to spend on buying video games. Each game costs $20. How many games can she buy with the money she has?
The owner of a bakery is making a special batch of cookies for a holiday sale. She needs 2/3 cup of sugar for each batch of cookies. If she makes 18 batches, how many cups of sugar will she need?
In Mrs. Kramer's Spanish class there are 30 students. Of those students, 90 percent are bilingual. Of those who are bilingual, 20% also speak French. How many students speak French?
The population of Tokyo is 4200 more than Seattle. The population of Seattle is 7 times that of Melbourne. If Tokyo has 25000 people, what is the population of Melbourne?
A librarian has 120 books on shelves. Using all the books, how many stacks of 4 books each can he make?
To reach her daily fitness goal, Samantha needs to walk at least 3 times as many miles as Taylor does. If Taylor walks 5 miles, how many miles do they walk altogether?
In a music class there are 50 students. Of those students, 60 percent play the guitar. Of those who play the guitar, 15% also play the piano. How many students play both instruments?
Lily planted 25 plum trees in her backyard. Her friend Amy planted 3 more trees than Lily. What's the total number of trees they planted?
Tom has a pet parrot named Polly. Polly eats corn to the extent of 30 kilograms every month. Polly's cage is originally filled with 50 kilograms of corn. How much corn will be left if Tom fills the cage after two months?
Justin's dad has a DVD collection of 120 DVD's. If he decides to give 15 DVD's to his brother and 20 to his sister, how many DVD's does he have left?
On Monday, 45 students in Mrs. Johnson's class brought their lunches. On Tuesday, 20 students brought their lunches, which was 15 less than on Monday. On Wednesday, 30 students fewer than Monday brought their lunches. What is the total number of lunches brought on these three days?
Ryan's family bought 60 liters of gasoline for their road trip. They consumed 12 liters for going to the mountains and 18 liters for going to the beach. How much gasoline does Ryan's family have left?
At the park, there are 15 swings, 25 slides, and 5 climbing structures. If the park is expanded to include four times as many climbing structures, two times as many slides, and twenty swings, how many playground structures are there in total?
Richie used to have 18 sticks. He gave 7 sticks to his brother Eddy. Afterward, Richie went to the craft store and bought 3 more sticks. Then he found 4 sticks left in the craft room. If he gave Eddie three times as many sticks as he currently has, how many sticks did Richie originally have?
In the toy box, there are 60 bears, 70 kittens, and 50 dogs. If there are twice as many bears as there are dogs, and 20 more kittens than bears, how many dogs are there?
Elly has 5 times as many buttons as Gilly, who has 25 buttons. If they have a button exchange and they each end up with an equal number of buttons, how many buttons does each girl end with?
Frank rides his bicycle at a speed of 12 miles an hour for 4 hours. His friend John rides his bicycle 2 miles less per hour for 2 hours longer than Frank. How many miles apart do they end up?
The district of Austin has 500 more trees than Springfield. Springfield has 3 times as many trees as Moreno. If Austin has 2000 trees, how many trees are there in Moreno?
Nina bought a set of books with 3 novels, a cookbook, and 2 science books. If each novel costs $8, the cookbook costs $5, and each science book costs $2, how much did Nina pay for the set of books?
Olivia makes chocolate chip cookies. She uses 4 cups of sugar for every 2 cups of flour. If she needs 12 cups of sugar, how many cups of flour does she need?
Andy starts the week with 60 stickers. On Monday, he received 7 stickers as a gift. On Wednesday, he gave 2 stickers to his sister, but on Thursday, he won 11 more stickers at school. How many stickers did Andy have by the end of the week?
At a party, Samantha can dance for 4 hours and her friend Emma can dance for 2 hours more than Samantha. If Emma dances for 2 more hours than the party lasts, how many hours did the party last?
Olivia has 20 stickers in her collection. At her birthday party, she received 3 times as many stickers as she had. Then she gave 12 stickers to her best friend. How many stickers does Olivia have now?
The area of Johnny's backyard is 480 square feet. He wants to put up a fence around the entire backyard. If the fence costs $2 per foot, how much money will Johnny need to spend on the fence?
Rex and his friends are playing a game. Rex rolls two dice. If the sum of the numbers on the dice is 8, Rex wins the game. How many different ways can Rex win the game?
A book costs $25 per copy. If a bookstore buys 30 books in bulk, they get 20% discount. How much money will the bookstore pay for 30 books?
Jessica and her brother Matt are playing a board game. Jessica rolls the dice and moves 7 spaces. Matt rolls the dice and moves 3 more spaces than Jessica. If Matt lands on space 14, what is the starting position of Jessica on the board?
Samantha is trying to save up for college. She has $2500. Her roommate has three-fifths as much money as Samantha. What is the combined amount of money they have?
Emily loves playing with her dolls. She has 15 porcelain dolls, which is 1/3 of the total number of dolls in her collection. How many dolls does Emily have in total?
Mike has 12 months to save up $1800 for a trip. If he can save 1/4 of the money each month, will he have enough money for the trip?
Lou is trying to find the combined area of two plots of land. The first plot is 3/4 as big as the second. If the second plot is 1500 square meters, what is the combined area of both plots?
Maria can read 15 chapters of a book in 5 hours. If she reads at the same rate, how many chapters can she read in 8 hours?
A bakery sells 150 loaves of bread in a week, and 500 pastries in a month. If each loaf of bread takes 2 cups of flour, and each pastry takes 1/4 cup of flour, how many cups of flour does the bakery need in a month?
On the graph, line A passes through the points (2,3) and (4,5). Line B passes through the points (2,5) and (4,-2). What is the coordinates of the point where line A and line B intersect?
If Shelly has 150 more stamps than her brother, and he has 50 less than her sister. If Shelly's sister has 200 more stamps than her brother, how many stamps does Shelly's brother have?
A delivery company charges $25 per delivery, plus $10 for each additional item. If a company ordered 15 items, and the total delivery charge is $245, how many deliveries were made?
On a certain day, a temperature controller recorded that at 6 am, the temperature was 5 degrees Celsius. At 9 am, it was 10 degrees Celsius. If the temperature increases by 3 degrees Celsius every 3 hours, what is the temperature at 6 pm?
Andy has 18 apples that he wants to distribute equally among 3 baskets. How many apples will each basket contain?
A bakery is having a sale of 2 loaves of bread for $1. How many loaves of bread can you buy with$12?
In a college, 35% of the 1200 students are in their second year. How many students are in their second year?
Tom has 45 marbles that he wants to put in bags of 5 marbles each. How many bags can he make?
In a town, 25% of the 400 residents own a dog. How many residents do not own a dog?
To qualify for a contest, contestants must play for 5 hours a day for 10 days. If John has already played for 4 days, how many more hours does he need to play to qualify?
James can paint a house in 3 days. His brother, Tom, can paint the same house in 2 days. How many days would it take for both of them to paint the house?
A snail is at the bottom of a 20-foot well. Each day, it climbs up 3 feet, but at night, it slips back 2 feet. How many days will it take for the snail to reach the top of the well?
In a group of 10 students, 3 students are chosen to represent them in a quiz. The remaining students will cheer for them. How many ways can the 3 students be chosen from the group?
A water tank can hold 3000 liters of water. Water is pumped into the tank at a rate of 40 liters per minute. How many minutes will it take to fill the tank?
Ava had 28 pencils in her bag. She gave 4 to her friend and bought 7 more. How many pencils does Ava have now?
A company has 120 employees. If 20 employees are absent due to sickness, how many employees are present in the company?
Tom is saving up money to buy a bike. He saved $20 in the first week, $15 in the second week, and $25 in the third week. How much money does Tom need to buy the bike that costs $90?
A bakery has 320 cookies. They sell 40 cookies in the morning and 60 cookies in the afternoon. If they want to make 200 more cookies for tomorrow, how many cookies will they have in total then?
Sam has 15 more books than Emma. If Emma has 8 books, how many books does Sam have?
David has 5 boxes of crayons in his art room. Each box has 8 packs of crayons, and each pack has 12 crayons. How many crayons does David have in total?
Ms. Johnson is planning a field trip to the zoo for her 42 students. She needs to put 6 students in each bus for a comfortable ride. How many buses will she need to hire?
Chris owns 12 baseball cards, but he gave 2 to each of his 3 friends. If he buys 4 new cards, how many baseball cards does Chris have now?
Rachel is making 3 batches of cookies for her school bake sale. Each batch needs 2 cups of sugar. If she buys 12 cups of sugar, does she have enough sugar for all the batches?
Mark is painting his room and he needs 3 buckets of paint. Each bucket holds 4 liters of paint. If he already has 2 liters of paint, how many more liters does he need?
Samantha has been saving money for a new bike and has $120 in her piggy bank. If she saves an additional $15 per week for 8 weeks, how much money will she have saved in total?
In a stack of 15 books, Tom takes out 3 books, and then adds 2 more books to the stack. If he repeats this process 4 times, how many books will be in the stack at the end?
At the school café, a sandwich costs $3, a salad costs $4, and a bag of chips costs $1. If Olivia buys 2 sandwiches, 1 salad, and a bag of chips, how much will she pay in total?
A bookshelf has 5 shelves, and each shelf can hold 8 books. If the bookshelf is currently empty, how many books can be placed on it in total?
Rachel is planning a road trip from City A to City B, which is 240 miles away. If she drives 40 miles per hour, how many hours will it take her to reach City B?
Tomosuke owns a bakery and he can make 6 cakes an hour. His sister Yoshiko can make 4 cakes an hour. If they start making cakes simultaneously and work for 3 hours, how many cakes will they have in total?
Giovanni is a programmer and he is working on 100 projects. Of these projects, 1/4 are successful. Of the successful projects, 1/3 are web applications. How many web applications has Giovanni programmed?
The number of tickets sold for a concert in a small town is 240. The number of men attending the concert is 50. The number of women is 4 times the number of men. How many women attended the concert?
A factory produces 1200 boxes of chocolates per day. There are 24 chocolates in each box. If the chocolates are packaged in bags of 8 chocolates each, how many bags can be filled from the chocolates produced in one day?
There are 120 graduate students at the university, and 3/4 of them are female. How many males are graduate students at the university?
Benny has 75 stickers in his collection. In the morning, Benny's little sister accidentally took 5 stickers. At lunch, his mom gave him 10 stickers with his favorite cartoon character. After lunch, he traded 7 stickers with his best friend. In the evening, Benny received a new sticker album and 27 stickers to fill it. How many stickers does Benny have now?
Karen has 360 pencils to be packed into boxes. If she has 15 boxes and each box needs to be filled with an equal number of pencils, how many pencils will each box contain?
An electrician needs 5 meters of wire for every house he fixes. He needs to fix 12 houses. How many meters of wire will the electrician need in total?
Tim's favorite snack is cookies. He baked 48 cookies in the morning and divided them into 4 equal groups. In the afternoon, he added 2 cookies to each group. How many cookies does each group contain now?
Sophia is saving money for a new bike. She saves 8 dollars every week. Her sister Emma is saving 3 dollars every week for the same bike. After 5 weeks, how much money will they have together to buy the bike?
Ann can skate 6 miles an hour. Her friend Glenda can skate 8 miles an hour. If they start in the same place and skate in straight lines in opposite directions for 3 hours, how many miles apart do they end up?
In Professor Plum's biology class there are 40 students. Of those students, 80 percent have puppies. Of those who have puppies, 25% also have parrots. How many students have both puppies and parrots?
In a field of 500 clovers, 20% have four leaves and one quarter of these are purple clovers. Assuming these proportions are exactly correct, how many clovers in the field are both purple and four-leaved?
John buys thank you cards. He decides to buy them for people who got him Christmas and birthday presents. He sent 20 for Christmas gifts and 15 for birthday gifts. If each card cost $2 how much did he spend on cards?
A survey conducted by the school showed that only 20% of the 800 parents agree to a tuition fee increase. How many parents disagree with the tuition fee increase?
In a bookstore, 12% of the books are fiction and 25% of the fiction books are bestsellers. If there are 400 books in the store, how many bestsellers are there?
The length of a rectangular garden is 10 meters more than its width. If the perimeter of the garden is 68 meters, what are the dimensions of the garden?
Of 120 students in a class, 50 play soccer, 40 play basketball, and 15 play both. How many students do not play either soccer or basketball?
A bakery sells 300 loaves of bread at $2 each. If the bakery spent $200 on rent, $150 on supplies, and $100 on labor, how much profit did the bakery make?
A group of friends want to split 48 pizzas equally. If they have 8 people, how many pizzas will each person get?
Mrs. Thompson has a garden with 15 different types of flowers, half of which are either pink or purple. How many of Mrs. Thompson's flowers are not pink or purple?
Maria's hair salon is offering a special deal on haircuts. She is charging 20% less than her usual price of $30 per haircut. If she has already given 10 haircuts at this price, how much did she make in total?
David is building a rectangular patio in his backyard that has a perimeter of 60 feet. If he wants to use a specific stone that comes in slabs of 5 feet in length, how many slabs will he need to buy?
If it takes 5 machines 5 minutes to make 5 widgets, how long will it take 100 machines to make 100 widgets?
The price of a stock increased by 15% last year. If the price was $50 a share at the beginning of the year, what was the price at the end of the year?
Carlos is making candy for a bake sale. He makes 4 batches of candy per day, and each batch requires 2 cups of sugar. If he makes candy for 5 days, how many cups of sugar does Carlos need in total?
Lily goes on a trip to the mountains with her family. Her family's car travels at 60 kilometers per hour. If they travel for 4 hours, how many kilometers do they travel?
In a bookshelf, there are 25 books. 40% of the books are fiction novels. Of the fiction novels, 30% are written by female authors. How many fiction novels are written by female authors?
Ben needs to buy materials for his school project. He needs to buy 2 rulers that cost $3 each, 4 colorful pens that cost $2 each, and a large notebook that costs $5. How much money does Ben need to spend in total for his school project?
Samantha's grandmother has a garden that measures 10 meters by 5 meters. She decides to plant flowers along the perimeter of the garden. If a packet of flowers can cover 2 meters of the perimeter, how many packets of flowers does Samantha's grandmother need to buy?
The manager of the local store is making an offer. You can get 3 kilograms of apples for $10 or 5 kilograms of apples for $15. Is it more economical to get the 15-dollar offer?
A company has 36 employees. 12 of them are engineers and 14 of them are developers. The rest are designers. How many designers are there in this company?
Alice and her brother Michael are waiting for the bus, which is scheduled to arrive in 45 minutes. They see a truck moving in the same direction as the bus. Alice says the truck is traveling at 40 miles per hour. Michael says it is traveling at 20 miles per hour. If the bus is going at 30 miles per hour, how far from the bus stop will the truck be when the bus arrives?
At a birthday party, there were 25 cupcakes. Katie ate 1/5 of them and Tom ate 3 cupcakes more than Katie. If they both ate an equal number of red velvet cupcakes, how many red velvet cupcakes did they eat in total?
A bakery produces 420 loaves of bread per day. They produce 3/5 as many whole wheat loaves as regular loaves. How many whole wheat loaves do they produce per day?
The zookeeper at the local zoo feeds the giraffes 60 pounds of leaves a day and the monkeys 20 pounds of bananas a day. If the zookeeper buys leaves at 5 dollars per pound and bananas at 3 dollars per pound, how much does he spend on food in a week?
Samantha is trying to save up for a new bike that costs 480 dollars. She currently has 120 dollars and each week she can save 30 dollars from her allowance. How many weeks will it take for Samantha to save enough for the bike?
Mr. Rodriguez has 48 students in his orchestra class. Of those students, 30 play the violin and 12 play the cellos. Of the students who play the violin, 5 students also play the cello. How many students play either the violin or the cello, but not both?
Robert has 140 stickers in his sticker book. His sister wants 30 stickers and he also owes his friend 20 stickers. If he wants to buy 40 new stickers that cost 2 dollars per pack of 5 stickers, how much will Robert have to pay?
The school book fair has a discount for buying books in bulk. If Emma buys 25 books at 5 dollars each, she gets a 10% discount on her total cost. If she then gives 5 books to her brother as a present, how much does Emma have to pay for the books she keeps?
Jamie's cat lives 15 years longer than Jamie's dog. If Jamie's dog lives 12 years, how many years do Jamie's cat and dog live in total?
When the teacher added one extra row of desks, there were 21 more desks in the classroom. If there were already 45 desks, and each row has the same number of desks, how many desks were in each row?
Ashley can read 24 pages per hour. Her sister Emily can read 16 pages per hour. If Ashley and Emily start reading a 160-page book at 2 PM, when will they finish the book if they read at the same time?
James has 9 more than twice the number of sister Lisa has. Lisa has 12. How many siblings do they have in total?
Stephanie's brother is 3 years older than her. Her sister is 2 years younger than her. If Stephanie's brother is 18 years old, how many years will it be until Stephanie's sister is 15?
Brittany plants flowers in a garden, for each of the 12 flowerbeds she plants 15 flowers. There is also a long path on the side of the garden, where she plants an additional 20 flowers. How many flowers does Brittany plant in the entire garden?
Jiro has a total of 180 stickers in his collection. He gave his little brother 12 stickers, then a quarter of the remaining stickers to his sister. How many stickers did Jiro's sister get?
Ava is reading a book that has 450 pages. She read the first chapter that had 30 pages, then read half of the remaining pages. How many pages has Ava read in total?
Olivia puts together a box of candies. She counted a total of 150 candies. If there were 30 red ones and 40 blue ones, then how many non-red and non-blue candies does the box contain?
Theo goes to a concert where there are 300 people seated in each of the 5 sections. Half of the sections have an extra 20 seats filled in. How many people are seated in total at the concert?
Kim has 15 boxes of crayons in her art room. Each box contains 24 crayons. She gives 5 boxes to her sister and then buys 3 more boxes from the store. How many crayons does Kim have now?
A certain model of printer can print 12 pages per minute. It can also copy at a rate of 8 copies per minute. If the printer prints for 10 minutes and then copies for 5 minutes, how many total pages and copies does it make?
Emily is making bed frames and requires 4 brackets for each frame. If she makes 8 frames and uses 2 more brackets for each frame than required, how many brackets did she use in total?
Jack has 12 pounds of flour to make cookies. He needs 1/2 pound of flour to make 12 cookies. How many batches of 12 cookies can he make with the flour he has?
The school is planning a field trip and 3 buses are needed to transport the students. Each bus can hold 48 students, and the school has 145 students going on the trip. How many students will be left over after the buses are filled?
A bookstore is hosting a sale. They have 20 percent off on each science book, which originally costs $30. How much will you pay in total for five of such books?
A farmer owns a barn that houses 150 animals: cows, pigs, and sheep. There are 30 cows and 40 pigs in the barn. How many sheep are there?
Sammy is able to swim three times as far as her brother Jesper can. If Jesper can swim 200 meters, how far can they both swim together?
The local library has 50 computers available for public use. Of these computers, one-fourth are for kids only, and 10 are reserved for librarians. How many computers are available to adults?
Melina is planning a party and needs to make some snacks. She has 120 buttons and 90 bows to use as decorations. If each snack requires 3 buttons and 2 bows, how many snacks can she make using all the decorations?
After completing 2/3 of his homework, Jamie still has 12 problems left. How many homework problems did Jamie have in the beginning?
On Monday, Tom read 32 pages of a book. On Tuesday, he read 3/4 of that amount. On Wednesday, he read 10 pages less than on Tuesday. How many pages did Tom read on Wednesday?
If Amanda weighs 70 kg, how many kilograms would 8 people weigh if they weighed the same as Amanda?
Bridget is planning a trip to France. She must exchange dollars for euros. The exchange rate is 1 dollar equals 0.76 euros. If Bridget exchanges 250 dollars, how many euros will she receive?
During his four-day trip, David traveled 160 km on the first day, 60 km on the second day, and 80 km on the third day. If he traveled 40 km more on the fourth day than on the second day, how many km did David travel in total?
Ashley buys a set of books worth $60. She pays with a $100 bill. How much change will she receive?
Olivia starts a piggy bank with 200 pennies. She adds 50 more pennies. Then, she adds $3. How much money does Olivia have in her piggy bank?
Charlie has 20 pencils. If he buys 15 more sets of 5 pencils, how many pencils will Charlie have in total?
At a movie theater, there are 10 rows of seats with 30 seats per row. If 20 seats are already taken, how many seats are still available?
A package weighs 10 pounds. If Sara adds 2 boxes each weighing 5 pounds, how much does the package weigh now?
Katie makes candles for her boutique. She needs some thread wax for gauzy candle decoration. The candle wax comes in 5-meter spools. Katie needs exactly 105 meters of wax for all her candles. How many spools will she need to buy?
Cooper and his friends went to an amusement park. They decided to ride the roller coaster 8 times, and each time they had to buy a new ticket. Each ticket costed $3. The tickets were sold in bundles of 4 for $10. If Cooper had $60, how much money will he have left after buying tickets for all his friends?
Lily has been saving money to buy a new bike. She has $80 in her piggy bank and her grandma agrees to give her $2 for every book she reads. Lily wants to buy a bike that costs $150. If she reads 10 books, will she have enough money to buy the bike?
Jason has a farm with 42 animals, and he wants to separate them equally into groups. If he wants 7 groups, how many animals will each group have?
Chelsea always eats twice as much pizza as her friend Rachel. If Rachel eats 2 slices of pizza, how many slices of pizza do they eat in total?
Lana has 15 pebbles in her collection. She gave 5 pebbles to her little brother Max. She then received 4 pebbles from her grandmother, and 8 pebbles from her friend Emma. If she gave Emma 2 pebbles back, how many pebbles does Lana have now?
Hana has been saving money in a piggy bank for her birthday. She saved 5 dollars a week for 10 weeks, and then got 20 dollars as a birthday gift from her aunt. If she then spent 12 dollars on a new toy, how much money does Hana have now?
A bookstore sells 250 books a month. In the past 5 months, they had a sale for 20% off. If the sale was valid for 3 out of the 5 months, and each book originally cost 10 dollars, how much money did the bookstore take in those 5 months?
Ruby has 120 buttons in her jar. She gave her mom 20 buttons, her aunt 15 buttons, and her friend Rachel 10 buttons. If she then received 40 buttons from her grandma, how many buttons does Ruby have now?
Ethan has 24 stickers in his sticker book. He received 12 stickers from his dad, 6 stickers from his mom, and 4 stickers from his neighbor. If he then gave his sister 8 stickers, how many stickers does Ethan have now?
Emily bought 20 fewer boxes of cereal than Tiffany. If Tiffany bought 40 boxes, how many boxes did they buy in total?
The teacher brought 100 more markers than pencils for the class art project. The class needs 3 times as many markers as erasers. If the teacher brought 300 markers, how many erasers did the teacher bring?
At a bookstore, 150 people came on Monday, 25 fewer people came on Tuesday, and 5 more people came on Wednesday than on Tuesday. How many people came to the bookstore on Wednesday?
Maria has 120 stickers, which she wants to distribute among her 4 friends. She also wants to give each friend 20 more stickers than what she gave to the previous friend. How many stickers will Maria give to her last friend?
There are 500 people at a concert, 35% of whom are women. If 25% of the women are sitting on the left side of the concert hall, how many women are sitting on the left side of the concert hall?
Tori has 12 books in her bookshelf. She buys 4 more, and her bookshelf can hold 20 books. How many more books can she buy?
Jasseena is joining a band. She already played 20 hours and she wants to play for 40 hours. How many more hours does she need to play?
In a bakery, every loaf of bread costs $3, every cookies $2, and every cakes $5. How much do you need to pay for 2 loaves of bread, three cakes, and four cookies?
Seth is 18 years old. His younger brother will be seven years younger than him in 12 years. What age will his brother be?
Kim has 40 stickers. She gives two stickers to every of her 5 friends and buys more stickers to have 50 stickers. How many stickers did she buy?
Daniel has a small shop where he sells homemade cookies. He has 300 cookies in stock. He needs to put them in packets of 20 cookies each. How many packets can he make with the available cookies?
Tom has 420 cubic feet of gravel in his backyard. He wants to transfer it to his friend's backyard using small containers that hold 3 cubic feet of gravel. How many containers does he need to use to transfer all the gravel?
Sarah wants to invite her friends to a party. She wants to give each friend a gift containing 5 balloons and 2 candies. If she has 250 balloons and 100 candies, how many gifts can she prepare?
Michael needs to arrange chairs in a row for a concert. Each row has 15 chairs. If he has 270 chairs, how many rows can he make?
Ashley needs to pack her books in boxes that hold 8 books each. If she has 96 books to pack, how many boxes does she need?
Alex started the day with 50 stickers. At recess, she lost 2 stickers while playing. At lunchtime, she traded 4 stickers with her best friend Maya. In the afternoon, Alex's mom bought her a new pack with 15 stickers. Maya came back and gave Alex three-quarters as many stickers as she received at lunch. How many stickers did Alex end the day with?
A bookstore has on its shelves 180 history books, 240 biology books, and 300 mathematics books. Using all the books, how many boxes containing 5 books each can the bookstore make?
Olivia is trying to save money for a new bike. She is saving $2.50 every day. Her grandma also decided to gift her $50 every month. She wants to save $600. How many days does Olivia need to save to reach her goal?
In a small town there are 350 households. Of those households, 30% have a pool and one fifth of these pools are heated pools. Assuming these proportions are exactly correct, how many pools in the town are heated pools?
In Mr. Smith's gym class there are 35 students. Of those students, 60 percent have competed in a marathon. Of those who have competed, 20% also have completed a triathlon. How many students have both completed a marathon and a triathlon?
Tom has 18 boxes of tomatoes. He gives 12 boxes to his brother and then he buys 25 more crates of tomatoes. How many crates of tomatoes does Tom have now?
A bookshelf has 6 shelves. If each shelf has 5 stacks and each stack has 3 books, how many books are there in total on the bookshelf?
David has 4 computers in his office. He adds 7 more computers and then he removes 2 computers that are not working properly. How many computers does David have now in his office?
Every week, Sam spends 30 minutes cleaning his room. How many hours would Sam have spent cleaning his room if he kept doing this for 10 weeks?
Sophia has a big jar of candies. She gives 10 candies to her friend and then she adds 24 more candies to the jar. If she started with 18 candies, how many candies does Sophia have now in the jar?
At a party, Jane has four times as many candies as Sally, and Sally has 25 candies. How many candies do Jane and Sally have altogether?
A furniture factory buys two rolls of fabric each week at \$5 per roll. If the factory works for 52 weeks a year, how much does it spend on fabric per year?
Farmer Bob has 30 cows that eat 2 bales of hay per day, and he has 20 sheep that eat 1 bale of hay per day. If he has 100 bales of hay, how many days will it last?
There are 15 peach trees in an orchard, and each tree produces 8 peaches per year. If the farmer picks one fifth of the peaches to sell, how many peaches does he pick in total?
Ava wants to build a bookshelf 5 feet long. The shelves are 0.5 feet wide, and she wants to put 8 books on each shelf. If each book occupies 0.2 feet space, how many shelves can she fit on her bookshelf?
Karen has five boxes of crayons. Each box contains 6 bags of crayons, and each bag holds 4 crayons. How many crayons does Karen have in total?
Jack and Sarah have a paper route that takes them 30 minutes. They deliver 3 newspapers every 5 minutes. How many newspapers do they deliver on each route?
Lila has 12 books on her bookshelf. If she adds 2 more books every month, how many books will she have after 6 months?
Michael has been saving money for a new bike. He has 120 dollars and saves 20 dollars per week. How many weeks will it take him to save 200 dollars?
Olivia leaves her house and drives for 4 hours at 60 miles per hour. She then drives for 3 hours at 75 miles per hour. How many miles has she driven in total?
Alice has 400 yards of fabric and wants to make scarves that require 5 yards of fabric each. How many scarves can she make?
A new phone costs $300 initially and then an additional $5 for every month it is used. How much will the phone cost after 12 months?
Mark, Sarah, and John want to share 120 cookies equally. If Sarah and John have eaten 10 cookies before sharing, how many cookies will each person get?
Leila can travel 80 miles in 2 hours. Her friend Mike can travel 120 miles in 3 hours. If they are traveling in opposite directions, how many miles will they be apart after 5 hours?
A certain book costs 30% less than another book. If the other book costs $50, how much does the certain book cost?
Tom sold three-fifths of his comic book collection consisting of 150 comic books. If he has 30 comic books left, how many books did he sell at the flea market?
Amanda is trying to reach her target of running 30 miles this week. She has already run 14 miles. If she needs to run at least 2 miles more than she did yesterday, how many miles did she run yesterday?
Matt and Rachel are planning a trip to Italy. They want to share their spending money, and Matt has $240 more than Rachel. If Rachel has one-fifth of the combined amount, how much money do they have together?
A bicycle factory manufactures 480 bicycles a day. The factory operates for 9 hours a day. If 20% of the bicycles made are defective, how many non-defective bicycles are produced per hour?
Lisa and her brother are planning a backyard campout. Lisa has 6 more sleeping bags than her brother. If they have 12 sleeping bags altogether, how many sleeping bags does Lisa's brother have?
If Mary spends 25 dollars to buy 5 toys, how much would she spend for 8 toys at the same rate?
Peter wants to pack 16 books into boxes that hold 4 books each. How many boxes will he need?
A chef has 72 cookies that need to be packaged. He can fit 9 cookies into each box. How many boxes will he need?
Jackson, Emma, and Samantha are painting a house. Jackson can paint half the house in 6 hours, Emma can paint one-third in 3 hours, and Samantha can paint one-quarter in 4 hours. How many hours will it take for them to paint the house, if they all work together?
Sarah has a rectangular garden that measures 25 feet by 10 feet. She wants to install a path that is 2 feet wide around the garden. What is the area of the path?
Samantha has to deliver a small battery to each of her 15 neighbors. She has 3 boxes with 9 batteries in each box. How many more batteries does Samantha need?
Olivia eats at least three times as many slices of pizza as Henry does. If Henry eats 4 slices of pizza, how many slices do they eat in total?
William is cooking a big meal and has to peel potatoes. He peels 6 potatoes in each of his 4 pots. If each potato yields 3 cooked servings, how many servings can William serve?
Rachel wants to raise money for a new bike by selling lemonade. She is selling lemonade for $2 per cup. She wants to raise $40. She already has $15. How many cups of lemonade does Rachel need to sell to reach her goal?
Tim has 10 pounds of ice and uses 20% of it to make ice cream cones. If he uses an equal amount of ice for each of his 4 flavors, how much ice does Tim use for each flavor?
Tom takes a bus to work every day. If each ticket cost $2.00, how many tickets will he buy if he has a $60.00 gift card to spend only on bus tickets?
On Fridays, Lucy can't wait to paint. For 3 hours every Friday, she paints and covers 6 canvases every hour. How many canvases does Lucy paint in 4 Fridays?
Jamie has 36$on his wallet. He wants to buy a new $12 dress shirt and $8 shoes. How much money will he have left if he goes on a shopping spree?
David plays a game that gives him 40 points for every level he completes. He completed 7 levels. How many points did David earn from the game?
Lisa decides to save money to buy a new bike. She saves $10 every week. If she needs$350 to buy the bike, for how many weeks must she save?
After a storm, it takes 4 days for a small pond to return to its original water level. If 15% of the pond water was lost during the storm, and 100 gallons of water flowed in every day, how much water was in the pond originally?
At a local diner, breakfast costs $3 and lunch costs $5. If 40% of the customers come for breakfast and the diner makes an average profit of $2 per dish, what is the average profit if 120 customers visit the diner daily?
A bakery sells two types of cakes: chocolate cake that sells for $15 and vanilla cake that sells for $12. If the bakery sells 250 cakes and the average cake sells for $13.20, how many chocolate cakes were sold?
Tom's average speed on a 12-mile trip was 4 miles per hour. On the return trip, Tom's average speed was 6 miles per hour. What is Tom's average speed for the entire trip?
Alex has a bag of candies, and he wants to share them with his friends. If he has 120 candies and wants to distribute them equally between 5, 7, and 12 friends, how many candies does each of the 7 friends get?
Linda has been working on her garden. She planted 3 times more roses than daisies. If she planted 12 daisies, how many roses did she plant?
Alex loves reading books. She reads 3 books a month. If she has been reading for 2 years, how many books has she read in total?
In a group of 70 students, 30 are boys. 20% of the girls are interested in studying engineering. If the total number of students interested in engineering is 18, how many girls are in the group?
Tom is planning a road trip. His car's fuel tank is 16 gallons, and his car can travel 400 miles on a full tank. If the trip is 2400 miles long, how many times will he need to stop for fuel?
Rachel's bakery sells 200 loaves of bread per day. 60% of the loaves are whole wheat. If the bakery operates for 7 days a week, how many whole wheat loaves are sold in a week?
Sophia is managing a storage unit containing crates of fruit juice. She packs 8 crates in each box, and there are 24 boxes in the unit. If the store orders 480 crates, how many more boxes does Sophia need to pack?
Alex is in charge of the school's library, where there are 3600 books on 40 shelves. If each shelf has 20 books of fiction, how many non-fiction books are there in total?
A bakery produces 120 loaves of bread per day. They use 1/4 of the loaves to fulfill a daily order. How many loaves are left for other customers?
There are 300 employees working in a 5-story building. If the top two floors have 100 employees in total, and the bottom floor has 50 employees, how many employees work on the middle two floors?
A car mechanic fixed 18 vehicles in a 6-hour period. If he spends an equal amount of time on each vehicle, how many minutes did he spend on each vehicle?
Robert has 35 boxes of books in his store. If he sold one-fifth of them, how many boxes does he have left?
Emily is making candles. She needs one-twelfth of a bottle of fragrance for each candle. How many candles can she make with 4 bottles of fragrance?
A book publisher prints 2400 books per day. how many books does the publisher print in 5 days?
A group of friends want to buy a video game that costs $45. If they pool their money together, they have $30. How much more money do they need to buy the game?
A bakery is making a special batch of 480 cakes for a holiday sale. They need to package 8 cakes per box. How many boxes will they need?
A library received a large donation of fiction books and placed them on ten shelves, with 30 books on each shelf. It then received another donation, doubling the number of books on each shelf. How many books are now on each shelf?
On average, Tom has eaten 5 apples every week for 7 months. If apples are sold in baskets of 12, how many baskets has Tom eaten in total?
A farmer has a rectangular plot of land, with a length of 8 meters and a width of 15 meters. If she wants to surround the plot with a fence, how many meters of fencing will she need?
In a school, there are 25 teachers, and each has 3 classes of 30 students each. What is the total number of students in the school?
If a bakery sells 1200 loaves of bread in a week, at $2 per loaf, how much money does the bakery earn in a week?
A manager of a small company has 200 employees, out of which 80 are college graduates. If the company hires 20 more graduates, what percentage of the total employees will be college graduates?
In a museum, 30% of the 120 exhibits are from Asia, and one-fifth of the remaining are from Africa. How many exhibits are from Europe?
Ellen makes candles. She uses 12 pounds of wax for every 3 candles. How many pounds of wax will she need to make 30 candles?
Mark has 15 minutes to cover a distance of 4.5 kilometers. If he walks at a speed of 1.5 kilometers per minute, how much time will he have left?
In a class of 30 students, 5 students are absent. Then, 2 more students leave the class. What percentage of the original class is still present?
Emily reads 15 pages of a book every day. How many pages will she read in a week?
Mark plants 20 seeds per row. If he plants 10 rows, how many seeds will he plant in total?
Sarah wants to buy some snacks. One pack of chips costs $2, one pack of cookies costs $3, and one pack of crackers costs $4. How much will she pay for 2 packs of chips, 3 packs of cookies, and 2 packs of crackers?
Jack has 25 dice. He wants to share them equally among his 5 friends. How many dice will each friend get?
Rachel buys a shirt and a pair of shoes. The shirt costs $8, and the shoes cost $18. How much will Rachel pay in total if she pays 8% tax on each item?
Ana remembers the recipe for making cookies. For every batch of 8 cookies, she uses 3 cups of sugar. How many batches of cookies can she make with 36 cups of sugar?
The school sergeant organized an event in which 240 students from Class A and Class B participated. Class A had 80 more students than Class B. If the ratio of boys to girls in Class A is 3:5 and in Class B is 2:3, how many boys participated in the event in total?
Nancy bought a toy car track. The track was 18 meters long. She extended it by attaching another track which is 5 meters longer than the first track. How many meters long is the track now?
Ashley plants apple seeds in her garden. For every 5 seeds she plants, 3 will grow into apple trees. How many trees will grow if she plants 90 seeds?
The school library has a total of 4800 fiction and non-fiction books. The number of fiction books is 240 less than the number of non-fiction books. How many fiction books does the library have?
A college student is taking a course in statistics and is required to complete 4 practice problems daily. If she needs to finish 30 practice problems, in how many days will she complete her work?
Bianca is planning a party for her niece's 5th birthday. Each cake portion that she orders will feed 4 guests. If she plans to invite 15 guests, how many cake portions should she order to ensure each guest gets at least one serving?
Ellen has agreed to walk her friend's dog for 3 days a week, walking the dog for 2 hours each day. If she gets paid $10 per hour, how much money will Ellen earn in one week?
A book costs $25. A 20% discount is offered on all books, and then an additional 10% discount on the discounted price. What is the final price that you would have to pay for the book?
Daniel has 15 bags of apples. If he sells 60 apples from the first bag, 30 from the second bag, and half of the total number of apples he has left, how many apples does Daniel have remaining?
Brandon has 50 chickens on his farm. Since his farm is near a river, he has to buy a certain number of repellent to keep them safe from snakes. Each snake repellent cost $5 and can repel 4 snakes. If there are 30 snakes in the area, how much money will Brandon need to buy repellant?
For a school festival, Dana has 10 boxes of crayons. If each box contains 8 crayons, and 5 students borrow 3 crayons each, how many crayons are left?
If Kylie can run 5 miles every 2 hours, how many miles will she run in 6 hours if she rests for an hour?
During a family reunion, Samantha used a recipe to make cookies that require 1/4 cup of butter to make 6 cookies. If Samantha wants to make 48 cookies, how many cups of butter will she need?
For a part-time job, Brady paints houses. If each house requires 5 gallons of paint and Brady paints 3 houses every 2 weeks, how many gallons of paint will Brady use in 8 weeks?
Noah has 45 books in his collection. He bought 9 more books at the store and then gave 7 books to his sister. His friend brought over 15 books to read for the summer, but 5 of them were already in Noah's collection. How many books does Noah have now?
The cost for using the new highway is $3 per mile for cars, $5 per mile for trucks and $2 per mile for motorcycles. One day, 50 cars, 25 trucks, and 15 motorcycles used the new highway. If the highway was 10 miles long, how much was the total revenue collected by the highway authority?
Maya's family owns a bakery. They made 180 muffins in the morning and 120 muffins in the evening. Half of the muffins were chocolate chip and the other half were blueberry. At the end of the day, they sold a third of all the muffins. How many blueberry muffins are left?
After losing 8 kilograms, Paula weighs 62 kilograms. If she loses another fifth of her current weight, how much will she weigh then?
Carlos is a runner who runs a rectangular track. The short side of the track is 400 meters and the long side is 600 meters. If he runs 10 laps around the track, how many kilometers did he run?
" and ending with "?
Olivia has 10 pet rabbits. She gets 3 more every year, but 2 rabbits escape every year. How many rabbits will Olivia have in 8 years?
In a small town, there are 2000 residents. If the town's population increases by 25% every year, how many residents will the town have in 4 years if the population in the first year only increased by 10%?
A boat can carry 150 crates. If the crates are stacked in piles of 5 crates high, how many piles can be made if each pile has an equal number of crates and there are no crates left over?
Emily has 12 buttons in a jar. She adds 2 more every week. If she wants to make 5 identical jewelry pieces, each requiring 8 buttons, how many weeks will it take her to collect enough buttons?
In a bakery, there are 5 batches of bread. Each batch has 15 loaves. If 2 batches are moved to the front of the store, and the rest are placed on a shelf that can hold 30 loaves, how many loaves are left over?
Sarah has 18 boxes of crayons. Each box contains 24 crayons. How many crayons does Sarah have in total?
Alex has three water bottles, each containing 25 ounces of water. How many ounces of water does Alex have in total?
A bookshelf has 12 shelves, each shelf can hold 8 books. If the bookshelf is currently empty, how many books can be placed on it in total?
Olivia can run 12 miles per hour, and her brother can run 8 miles per hour. If they both run for 3 hours, how many miles will they run combined?
A bakery is making a special deal on cookies. They are offering 18 cookies for $5, and 30 cookies for $8. How much will it cost to buy 42 cookies?
Michael is saving up money for a new bike and has $120 dollars in his piggy bank. His parents promised to give him an additional 20 dollars for every 10 dollars he saves. How much money will Michael have once his parents give him the additional money if he has $150 dollars total?
Sarah is planning a picnic and needs to buy some water. She wants to buy bottles with a capacity of 0.5 liters each. If she wants to have 10 liters of water in total, how many bottles should she buy?
A bakery is selling cookies at a discounted price. The original price of a cookie is $5, but it's on sale for 15% off. If you want to buy 12 cookies, how much will you need to pay in total?
Tom has 50 kg of grapes to make wine. He wants to divide it into 5 kilograms bags. How many bags can he fill with the grapes he has?
In a bag of fruits, 30% are apples and 20% are bananas. The rest are oranges. If there are 120 fruits in total, how many oranges are there?
A city has 50 buses and each bus carries 40 passengers. If 20% of the buses are out of service, how many passengers can be carried by the remaining buses?
A bakery has 150 loaves of bread and 240 pastries. Using all the baked goods, how many boxes containing 10 items each can they pack?
An athlete scored 60 points in the first quarter, 50 points in the second quarter, and 45 points in the third quarter. How many more points does she need to score in the fourth quarter to average 55 points per quarter?
Mr. Thompson has 300 books on his shelf. He decides to give away 10 books to charity every year. How many books will he have left after 15 years?
Ben's car drives 25 miles per hour. If he drives 2 hours in the morning and 3 hours in the afternoon, how many miles will he have driven by the end of the day?
When Jessica turns 25, she will be three times as old as Emily. Jessica is 10 years older than Emily. What is Emily's current age?
Olivia had 3 dolls, and her grandmother gave her 2 more every year on her birthday. If she lost 1 doll in an accident, how many dolls will she have after 7 years?
A bakery produces 250 loaves of bread in 5 hours. If the bakery operates for 10 hours a day, how many loaves of bread do they produce in a day?
Samantha's mother wants to make cookies for a charity event. The recipe calls for a ratio of 2 cups of sugar to 3 cups of flour. If Samantha's mother needs 12 cups of flour, how many cups of sugar does she need?
Carlos wants to buy a new bike that costs $450. He saved $50 every month from his allowance. How many months will it take him to buy the bike?
Rachel's favorite bookstore has a special promotion: buy 2 books and get 1 free. If Rachel buys 12 books, how many free books will she get?
Sarah has 25 boxes of crayons. She gives 5 boxes to her friend and buys 10 more. If each box has 20 crayons, how many crayons does Sarah have in total?
Charlie has 15 pairs of socks. He gave 3 to his brother and bought 2 more packets with 5 pairs in each packet. How many socks does Charlie have in total?
A bakery sells 40 cakes, 20 donuts, and 30 cookies. If the cakes cost $3 each, the donuts cost $2 each, and the cookies cost $1 each, how much money did the bakery make?
Olivia has 30 stickers and wants to share them equally among 6 friends. If she has 5 stickers left, how many stickers did each friend get?
Michael has 12 marbles, 8 of them are red, 2 are blue, and 2 are green. If he adds 4 blue marbles and 2 green marbles, how many marbles of each color does he have?
Emma has 18 pets, 2/3 of which are cats. If she adds 4 more dogs and 2 more cats, how many pets does Emma have now?
A bookstore has 25 shelves, and each shelf can hold 8 books. If the bookstore has 15 books on each shelf, how many more books can they add?
Ben has 40 pencils in his bag. He gives 8 to his sister and buys 12 more. If he also has 15 pens, how many writing tools does Ben have in total?
Rachel has 24 dolls and wants to display them on 4 shelves with an equal number of dolls on each shelf. If she adds 4 more dolls, how many dolls will each shelf have?
A restaurant sells 50 burgers, 30 salads, and 20 sandwiches. If the burgers cost $5 each, the salads cost $3 each, and the sandwiches cost $4 each, how much money did the restaurant make?
Samantha has a big basket of apples. She has 4 times as many red apples as green apples. If she has 12 green apples, how many apples does Samantha have in total?
If 3 computers take 4 hours to complete a task, how many hours will it take for 5 computers to complete the same task?
Jack has $120 dollars to spend on his birthday. He saw a pair of shoes for $20. If he buys 6 pairs of shoes, how much money will Jack have left?
There are 200 books on a shelf. After donating 30 books to the library, and buying 10 new books, how many books are on the shelf?
A bakery sells 250 loaves of bread per day. If they make 5 times as many loaves of bread on Fridays, how many loaves of bread do they make on Fridays?
Brian purchases five times as many novels as he does biography books. He has 10 biography books. How many books does he have in total?
At the school store, there are 20 pencils in a box. If there are 5 boxes in a case, and the store has 12 cases, how many pencils are there in total?
Pablo is making a trail mix. He needs 3 parts peanuts and 2 parts almonds. If he uses 9 cups of peanuts, how many cups of almonds does he need?
Amanda has three swimsuits, twice as many shirts as swimsuits, and 4 more shorts than shirts. If she wants to randomly pick an item of clothing, what is the probability it will be a swimsuit?
A bookstore sells 15 romance novels and 25 mysteries per day. If it operates 7 days a week, how many books does it sell per week?
Mario's collection of colored pencils consists of 30 blue, 25 green, and 15 red pencils. He added 45 red and 20 green pencils. How many pencils does Mario have now?
Santa's reindeer team ran for 12 hours with an average speed of 45 km per hour. If their speed is reduced by 10 km per hour, how many km would they travel in 8 hours?
The city park has 18 swings, 24 benches, and 12 seesaws. The city council has decided to add 6 more swings, 10 more benches, and 8 more seesaws. How many recreational items are there in the park now?
Tom purchased 8 books at 15 dollars each and 12 magazines at 8 dollars each. He paid with a 200-dollar bill. How much change did Tom receive?
A fashionable boutique sells scarves for 12 dollars each, hats for 20 dollars each, and gloves for 5 dollars each. If Samantha wants to buy 2 scarves, 1 hat, and 3 gloves, how much will she need to pay in total?
Jackson's Bakery has 400 loaves of bread ready for delivery. If the delivery truck carries 16 crates, and each crate holds 5 loaves, how many trips must the truck make to deliver all the bread?
On the first day of spring, Lucy's garden has 120 flowers, and 3 times as many flowerpots. If she can fit 5 flowerpots on her gardening cart, how many trips must she make to transfer all the flowerpots to the storage shed?
Benny's family needs 30 jars of jam for the winter. Benny found a old recipe for homemade jam that uses 2 cups of strawberries per jar. If the strawberry patch produces 40 baskets of strawberries, and each basket contains 12 cups, will Benny have enough strawberries to make the jam?
Charles has 50 kilograms of apples to make apple pies. If each pie requires 2 kilograms of apples, how many pies can Charles make?
Samantha's school has 480 students. She observes that 1 in every 5 students play the violin, and of those, 2 in 5 also play the guitar. How many students play both the violin and the guitar?
David has a lawn that is 12 feet by 8 feet. If he wants to put a square foot of grass every 4 feet, how many squares of grass will he need?
Nancy baked 4 more pizzas than Jennifer. If Jennifer baked 9 pizzas, how many pizzas did they bake altogether?
A bookshelf has 12 shelves and each shelf can hold 6 books. If the bookcase is currently empty, how many books can be placed on it in total?
An aquarium has 9 fish and the owner adds 2 more fish per day for 5 days. How many fish will the aquarium have after 5 days?
A rectangular garden has a length of 16 meters and a width of 8 meters. If a path that is 1 meter wide is built around the garden, what is the area of the path?
A construction company has 480 bricks and 360 stones. Using all the materials, how many buildings containing 20 bricks and 15 stones each can they build?
Samantha has 24 pencils in her pencil case. She loses half of her pencils on the way to school and then finds 12 more. How many pencils did Samantha have originally?
If joggers can jog 4 miles in an hour, how many miles can they jog in 6 days, 2 hours and 30 minutes?
Mars has three times as many rings as Jupiter. If Jupiter has 16 rings, how many rings do they have altogether?
Jane has a collection of stamps, and she gives half of them to her brother. Then she buys 15 more stamps. If Jane now has 30 stamps, how many stamps did she have originally?
Amanda slept for 3 hours before going to work, and then another 5 hours after coming back home from work. If she needs to sleep for 10 hours a day, how many more hours does she need to sleep?
David has 15 apples in his bag, and he gives 3 apples to his friend. If he then adds 5 more apples to his bag, how many apples does David have in total?
At a game store, the owner sold 240 video games in the first week of the month. In the second week, the store sold 20% more games than the first week. How many video games did the store sell in the second week?
jessica scored 80 points in a game, and then scored 20 points more in the next game. If she scored 40 points in the third game, how many points did Jessica score in total?
A bookshelf has 5 shelves, and each shelf can hold 8 books. If the bookshelf is currently empty, how many books can be placed on it in total?
Lucy has a total of 120 stickers in her collection. She wants to put the same number of stickers in 6 different albums. After putting 20 extra stickers on a gift for her sister, how many stickers will each album have?
Mario wants to put new tiles on his bathroom floor, covering an area of 48 square meters. He has two types of tiles: a small one covering 2 square meters and a large one covering 4 square meters. If he has 12 large tiles, how many small tiles will he need to cover the entire floor?
Olivia has a bag of apples. She gives 1/5 of the apples to her brother. Later, she gives 1/2 of the remaining apples to her sister. If she had 25 apples initially, how many apples does Olivia have left?
A bookshelf has 5 shelves, and each shelf can hold 8 books. If the bookshelf is currently empty, how many books can be placed on it in total?
Alex has 18 boxes of crayons in her art box. Each box contains 24 packs of crayons. If she wants to put 3 packs of crayons in each of her 9 art folders, how many packs of crayons will she have left?
Annie has 10 strawberry plants in her garden. Each year, 3 new strawberry plants grow, and 2 strawberries die. How many strawberry plants will Annie have in 7 years?
Louie is riding a bike that can go 12 miles per hour. His sister, Beth, is riding a bike that can go 8 miles per hour in the opposite direction. How far apart are they after they ride for 4 hours?
Kayle had 25 pencils in his bag. During lunch, he gave his friend three pencils. After lunch, his mom bought him 5 new pencils for his bag. His friend came back and gave Kayle one pencil less than he received from Kayle. How many pencils does Kayle have in total?
At a bookstore, paperbacks cost $3 each, and hardcover books cost $5 each. If Sara buys 4 paperbacks and 2 hardcover books, how much will she pay in total?
Frank has a swimming test and can do 15 laps in 20 minutes. If he wants to do twice as many laps as his friend Jane, and Jane can do 24 laps in 30 minutes, how many laps can Frank do in 45 minutes?
Austin has 150 more students than Boston. Boston has 3 times as many students as Denver. If Austin has 450 students, how many students are there in Denver?
In a box of chocolates, there are 36 chocolates in total, including 12 nuts and 20 creams. How many solid chocolates are there?
Tennessee has three-fifths as many people as the state of Georgia. If Georgia has 4800000 people, how many people live in Tennessee?
Tom is part of a project involving 75 technicians. A third of them are experts in robotics and three-fourths are experts in electrical systems. How many technicians are experts in neither robotics nor electrical systems?
Sophia sells 30 scarves for $12 each. The materials cost $60. How much does she make in profit?
John has a collection of DVDs and CDs. He has 50 DVDs and 35 CDs. He buys some new DVDs and CDs but at the end he has 75 DVDs and 55 CDs. How many DVDs and CDs did he buy in total?
A bakery sells 240 loaves of bread on Monday, 180 loaves of bread on Tuesday, 230 loaves of bread on Wednesday, and 220 loaves of bread on Thursday. How many loaves of bread do they sell per day on average?
Michael can jog 12 miles in 2 hours, while his friend Emma can jog 15 miles in 3 hours. How much faster in terms of miles per hour is Emma's jogging speed compared to Michael's jogging speed?
Sue originally had 425 stickers in her sticker book. She gave 75 stickers to her friend and then received 125 stickers for her birthday. How many stickers does Sue have now?
Tom has $580 in his checking account and decides to transfer $120 to his savings account. Later, he deposits $180 into his checking account. How much money does Tom have in his checking account now?
Tom's pet store has 70 cages, with 15 cages containing dogs, and 30 cages containing birds. If he rearranges the store and places all the dogs and birds together, how many cages will be remaining?
Eva's mom runs a bakery. She baked 250 loaves of bread and 300 pastries. She sold 30% of the bread and 25% of the pastries. If each loaf of bread was sold for $2 and each pastry was sold for $3, what is the total revenue of the bakery?
Tim is saving money for basketball camp. He saves 12 dollars per week for 20 weeks, then mom gave him an extra 100 dollars, and dad also gave him 50 dollars. How much money did Tim collect in total for his basketball camp?
Ashley's garden has 500 square meters. She planted 30% of the area with rose bushes and 20% with lilies. What percentage of Ashley's garden is left for other plants?
David's grandma has a collection of 120 vintage dolls. Over the years, she gave away 18 dolls to charity and sold 12 dolls to a collector. What percentage of the dolls does she have remaining in her collection?
A carpenter has 120 wooden boards, each measuring 3 meters long. If he wants to cut them into pieces of 0.5 meters each, how many pieces can he make in total?
Every month, Sarah saves 1/4 of her income. If she earns $1200 monthly, how much money will she have saved after 6 months?
Matt's bike travels 12 miles per hour. His friend's bike travels 8 miles per hour. If they start at the same time and travel in the same direction, how many miles ahead will Matt be after 2 hours?
A bakery makes 480 cookies per day. They pack 12 cookies into each box. How many boxes of cookies can they fill in a day?
Ryan's age is 3/5 of his sister's age. If his sister is 20 years old, how old will Ryan be in 5 years?
In a library of 800 books, 60% are fiction and one third of these are romance novels. Assuming these proportions are exactly correct, how many romance novels are in the library?
Max sells 25 bicycle helmets a week. How many bicycle helmets will Max sell in 5 months if in the first week he only sells 20 helmets?
Emily has 18 boxes of crayons. Each box contains 24 crayons. If Emily sells 8 crayons for $2, how much money will she make in total from selling all the crayons?
Olivia is baking cookies for a party. She decides to bake them for guests who are coming from the North, South, East, and West. She baked 45 cookies for guests from the North and 20 cookies for guests from the South. If each cookie costs $0.50, how much did Olivia spend on cookies for all the guests?
In a park of 3500 trees, 30% have red leaves and 2/5 of these are oak trees. Assuming these proportions are exactly correct, how many oak trees are in the park?
A bookshelf has 12 shelves, and each shelf can hold 8 books. If the bookshelf is currently empty, how many books can be placed on it in total?
Tom has 18 bags of apples. In each bag, there are 5 apples. If he gives 2 bags to his friend, how many apples does Tom have left?
David wants to paint his room. He needs 3 coats of paint, and each coat requires 2 gallons of paint. If he has 4 gallons of paint, how many gallons does he need to buy?
A factory produces 400 toys per day. If they operate 6 days a week, how many toys do they produce in a week?
Molly is planning a party and wants to put 4 cookies on each table. If she has 16 tables, how many cookies will she need in total?
Lola has twenty five boxes of record disks in her store. Twenty five record disks are packed in each box. If she sold each record disk for four dollars, how much did she earn if she sold all the record disks?
A metal worker has 30 buckets of paint. In each bucket, there are 20 cans of paint. If each can holds 5 liters of paint, how many liters of paint does she have in total?
Tom has one hundred fifty dollars saved up. If he spends twenty dollars on books and thirty dollars on snacks, what percentage of his money did he spend?
In a certain farm, one-fifth of the total number of animals are sheep. If the farm has twenty-four sheep, how many animals are there in total?
At the school library, there are 450 books on the shelves. If the librarian receives a new shipment of 235 more books, what is the new total number of books on the shelves?
During a concert, there was a report that half of the tickets were sold out. However, when the concert began, one hundred additional people showed up. In total, there were 1500 people present. How many tickets were available?
Frank has 7 times more books on his shelf than chairs in his room. Frank has 7 chairs. If there are 42 more books than the chairs, how many books does he have?
Mark wants to buy a new TV for his birthday. The TV costs 1200 dollars. If Mark has saved 900 dollars and he is planning to save money for 3 months. How much money does he need to save each month in order to buy the TV?
Rachel always takes 20 minutes to walk to work and 10 minutes to drive to work. If Rachel walked for 5 days and drove for 3 days, how many minutes did she spend in total traveling to work?
If John has 12 apples, and he gives 2 apples to Jack, and 1 apple to Sarah, what fraction of the apples does John have left?
A manager of a restaurant has estimated that 30% of his customers will order dessert. On a busy day, 400 customers ate at the restaurant. Of those who ordered dessert, 75% ordered cake. How many customers ordered cake?
A small company has 400 employees, and 25% of them are engineers. 80% of the engineers are assigned to project A, and 20% of the rest of the employees are assigned to project A as well. How many employees are assigned to project A in total?
A bicycle route consists of three different sections. Section A is 5 miles long, section B is 3 miles long, and section C is twice as long as section B. How many miles long is the entire bicycle route?
Last year, a car dealership sold 250 cars, of which 20% were electric. This year, the dealership sold 300 cars, of which 15% were electric. By what percentage did the number of electric cars sold increase?
A bookstore has 1200 books in its inventory. 20% of them are fiction books, and 30% of the fiction books are bestsellers. How many bestseller fiction books does the bookstore have?
Alex, a software engineer, can build 15 modules of a project in a day. If he needs to build 285 modules in 20 days, how many more modules does he need to build each day?
Emma, a librarian, has 60 books on the shelf. Every week, 5 books are checked out. In how many weeks will there be 10 books left on the shelf?
Charlie, a carpenter, needs 8 pounds of nails for a small project. If he has a bag of 24 pounds of nails, how many more pounds of nails will he have left after completing the project?
Emily bought a dress that was originally $80. During a sale, the dress was discounted by 15%. How much did Emily pay for the dress?
Tom has a circular garden that has a diameter of 14 meters. The path around the garden is 2 meters wide. How long is the path around the garden?
If Tom has 1000 marbles in a jar and he adds 250 more, how many marbles does Tom have in total?
A bakery sells a total of 240 pastries each day. The bakery sells 4 times as many muffins as cookies. If they sell 40 cookies, how many muffins do they sell?
Emily has 5 more stickers than her brother. Her brother has 12 times as many stickers as her sister. If Emily has 36 stickers, how many stickers does her sister have?
When Alice makes lemonade, she mixes one part lemon juice to three parts water, and she adds two tablespoons of sugar for every cup of water. For every two cups of lemonade, she serves one glass. She made five cups of lemonade in her latest mix. How many glasses did she serve?
Olivia is harvesting her wheat farm and transports it to her store in small sacks containing 20 kgs of wheat each. In the first trip, she transports 30 sacks, in the second trip 40 sacks, and in the third trip 20 sacks. What is the total weight of wheat transported by Olivia?
Samantha has three more siblings than Olivia. If Olivia has 7 siblings, how many siblings do they have altogether?
Alex has two bags of cookies to package for a bake sale. One bag weighs 15 pounds and he has 20 bags. He wants to divide them equally into packages weighing 3 pounds. How many packages will he make?
In a bookstore, every novel costs $8, every biography $12, and every self-help book $15. How much do you need to pay for five novels, three biographies, and two self-help books?
When making pasta, Antonio uses a ratio of one part tomato sauce to two parts garlic paste, and he seasons it with one teaspoon of oregano for every four parts garlic paste. For every one teaspoon of oregano, he uses three meatballs. He used ten teaspoons of tomato sauce in his latest pasta. How many meatballs did he use?
Texas is one-fourth as populated as California. If California has 14000000 people, calculate the combined population of both states?
In a certain school, there are 240 students in each grade from 1 to 8. How many students are there in total in the school?
Juan has a container of 50 oranges. He gives 10 oranges to his brother. Then he gives 15 oranges to his sister. How many oranges does Juan have left?
The area of a square is 81 square meters. What is the length of one side of the square?
A bicycle costs $ 240. If it is on sale for 15% off, what is the sale price of the bicycle?
In a bag of apples, 5 apples are rotten. If there are 25 apples in total, what percentage of the apples are rotten?
The local bakery was trying to attract more customers. They increased the price of bread by 20%. If they originally charged 15 dollars for a loaf of bread, how much would a customer expect to pay now?
There were 100 students in the class of 1975. After 20 years, the class of 1995 had 25 more students. If the number of students increases by 50 for every 10 years after that, how many students were there in the class of 2015?
A snail is traveling from one garden to another that is 15 meters apart. The snail can travel 30 centimeters every minute. If the snail takes a 5-minute break every 20 minutes, how many minutes will it take the snail to reach the other garden?
A tap can fill a tank at a rate of 2 cubic meters per hour. However, due to a leak, the tank loses water at a rate of 0.5 cubic meters per hour. If the capacity of the tank is 40 cubic meters, how long will it take to fill the tank?
In a school with 200 students, 30% of the students study mathematics and 40% study languages. How many students study either mathematics or languages?
If Tom's dog runs 4 kilometers per hour and Tom's cat runs 2 kilometers per hour, how many hours will it take for Tom's dog to run 12 kilometers more than Tom's cat if they start at the same time?
Jack is making jewelry and he has 12 bags of beads. Each bag contains 30 packets of beads. If each packet contains 8 beads, how many beads does Jack have in total?
Maria is a marketing manager at a company with 150 employees. One-third of the employees are women, and one-fifth of all women are managers. How many female managers are there in the company?
Williams is a professor and assigns grades to his students based on the number of hours they study per week. If a student studies 5 hours per week, they get a score of 50. If they study 10 hours, they get a score of 120. How many hours per week does a student need to study to get a score of 200?
Carlos is three times the age of his niece, and Carlos's niece is twice the age of Carlos's cousin. If the sum of the ages of Carlos, his niece, and his cousin is 120 years, then how many years old is Carlos's cousin?
In a group of 300 students, 40% have bicycles and one fifth of these students also have skateboards. Assuming these proportions are exactly correct, how many students in the group have both bicycles and skateboards?
Sarah buys flowers. She decides to buy them for people who got her wedding and graduation presents. She sent 35 for wedding gifts and 25 for graduation gifts. If each bouquet cost $3 how much did she spend on flowers?
In Professor Green's math class there are 50 students. Of those students, 90 percent have laptops. Of those who have laptops, 20% also have calculators. How many students have both laptops and calculators?
When Michael makes cookies, he spices them with a ratio of one part cinnamon to three parts sugar, and he flavors them with one teaspoon of nutmeg for every three cups of sugar. For every one teaspoon of nutmeg, he uses four eggs. He used three cups of cinnamon in his latest cookie batch. How many eggs did he use?
Brenda has five pets: three dogs and two cats. She wants to take two pets per day for a walk during vacation. How many days will she be able to take them for a walk?
A library has 50 shelves with 12 rows of books each. If every row contains 8 books, how many books does the library have in total?
Alex ORDERS PIZZA for his party. The pizza parlor has a special deal for 2 larges for $20, but Alex needs to order four more larges for the extra guests. If the cost of each extra large is $15, how much will Alex pay for all the pizzas?
A snail climbs 3 cm up a 15 cm tall wall every day, but slips 2 cm back every night. How many days will it take for the snail to reach the top of the wall?
Myles has 25 identical pens in a jar. He randomly selects 5 pens and finds that 3 of them are defective. What is the probability that the next pen he selects will also be defective?
Angela's aunt owns a furniture store and she doesn't know which furniture to stock more. If she sells a total of 450 tables and 40% of them are coffee tables, how many coffee tables does she need to restock?
In Miss Leaf's garden, 15% of the flowers are red roses and 40% of the red roses are specifically velvet roses. Assuming these proportions are exactly correct, how many flowers in Miss Leaf's garden are velvet roses?
In a bag of apples, 1/5 are green apples and 1/3 of the green apples are rotten. If the bag has 120 apples, how many rotten green apples are there?
Tyler's sister buys candies from a candy store. She buys a mix of sour candies and sweet candies. If she bought 36 bags of candies with 20 sour candies in each bag and 30 sweet candies in each bag, how many candies did she buy in total?
In a group of 80 friends, 60% of them have traveled to Europe and 30% of those who have traveled to Europe have also traveled to Asia. How many of the friends have traveled to both Europe and Asia?
Sarah wants to buy 10 party invitations. The store offers 5 different color invitations. If each color has 7 different designs, how many different invitation designs can Sarah choose from?
Matt has a part-time job. He makes 12 dollars per hour. If he works 15 hours one week and 20 hours the other week, how much money does he make in 2 weeks?
Stacy wants to make 18 batches of cookies. Each batch needs 2 3/4 cups of sugar. How much sugar does Stacy need in total to make the cookies?
Juan is collecting stamps. He has 15 books that each can hold 20 stamps. If Juan currently has 250 stamps, how many more stamps can he add to his stamp collection?
Mike can paint a room in 2 hours. His brother Michael can paint the same room in 3 hours. If they work together, how long will it take them to paint the room?
Emma has 10 pairs of socks in her closet. She buys 2 more pairs and then finds 5 single socks under the bed. How many socks does Emma have in total?
John has 3000 stones in his pocket. On his way to school, he loses 15 stones at the crossing and 10 stones at the shop. How many stones does John have left?
Sarah can solve a math problem in 4 minutes. If Rachel can solve the same problem in 3 minutes, and they both work together, how many math problems can they solve in 12 minutes?
A bookshelf has 5 shelves, and each shelf can hold 8 books. If each book has 300 pages, how many pages are there in total in the bookshelf, assuming it is fully loaded?
David has 12 apples in his lunchbox. He gives 2 apples to a friend and then buys 4 more apples. How many apples does David have now?
Maria can bake 3 dozen cookies an hour. Her sister Louise can bake 4 dozen cookies an hour. If they start baking at the same time and Maria bakes for 4 hours and Louise for 3 hours, how many dozen cookies do they bake in total?
A hotel room costs $80 per night. If Tom has to pay an additional $5 tax each night, and he stays for 10 nights, how much does Tom have to pay for the hotel room?
Tom has 120 stickers. At the store, he buys 5 sticker sheets with 8 stickers each. Then, after receiving 12 more stickers as a gift, how many stickers does Tom have?
Anna is buying groceries for the week. A loaf of bread costs $1.50, a bag of apples costs $2.50, and a bottle of milk costs $1.80. How much will Anna pay for 2 loaves of bread, 4 bags of apples, and 2 bottles of milk?
A shoe store is having a sale. Every pair of sneakers costs $20 less than every pair of boots, and a pair of sneakers costs $50. If every pair of boots costs $x, then how much does a pair of boots cost?
In Mrs. Smith's kindergarten class, there are 36 students. Of those students, 25 percent have pet rabbits. Of those who have rabbits, 60 percent also have pet hamsters. How many students have both rabbits and hamsters?
The capital city is one-fifth the size of the entire country. If the country has 1500000 people, how many people live in the capital city?
The dance hall has 200 more chairs than the banquet hall. The banquet hall has one-third the number of chairs as the conference hall. If the conference hall has 1200 chairs, how many chairs are there in the dance hall?
Benny is trying to collect all the stickers from his favorite superhero movie. At first, he had 120 stickers. His friends know how much he loves the movie, so they each gave him some stickers. Jake gave him 4 times as many stickers as Emily. Emily gave Benny 7 stickers more than Mike. Mike gave Benny 2 stickers, 5 less than Sarah. How many stickers does Benny have in total?
Doctor Lee is a veterinarian who specializes in giving vaccinations to cats and dogs. The cat vaccine requires 2 milliliters per cat, while the dog vaccine requires 5 milliliters per dog. Doctor Lee has 150 milliliters of vaccine in total. If she needs to vaccinate 20 cats, how many dogs can she vaccinate?
Adam buys books for his library. He buys 10 books for fantasy and 20 books for science fiction. If each book cost $5 how much did he spend on books?
There are 30 books in Mr. Smith's office, but 1/10 of them are thriller books. How many thriller books are in Mr. Smith's office?
Emily started the day with 18 stickers. She gave 4 stickers to her sister and 2 more to her brother. She bought 8 more stickers at the store. How many stickers does Emily have left?
Jack has 10 football cards more than his brother. If his brother has 15 football cards, how many football cards do they have in total?
Mary has 16 pets in her house, and she gets 4 more pets every year. How many pets will she have after 3 years?
If it takes Paul 4 hours to walk 12 miles, how many hours will it take him to walk 25 miles?
Michael can buy notebooks for $2 each, pencils for 50 cents, and pens for 25 cents. He needs 15 notebooks, 40 pencils, and 20 pens. How much will it cost him to buy all the school supplies?
A water tank can hold 120 gallons of water. If 30 gallons are already filled and another 20 gallons are pumped into the tank, how much more water is needed to fill the tank?
In a party, 60% of the 200 guests are female. How many male guests are at the party?
Amanda has been saving up money for a new bike and has $350. She needs $400 to buy the bike she wants. If she gets $15 per hour by babysitting, how many hours does she need to babysit to buy the bike?
In Candyland there are 200 lollipops. If the number of lollipops decreased by 60, and then increased by 30, what is the total number of lollipops now?
Celia's favorite book series has 120 pages in the first book, 150 pages in the second book, and 180 pages in the third book. How many more pages are in the third book than the first book?
Hazel's favorite video game lets her play with up to 10 robots. She can upgrade each robot 5 times. How many robot upgrades can Hazel do in total?
Xavier's bicycle travels at a speed of 20 kilometers per hour. His friend, Ruby, rides her bicycle at a speed of 15 kilometers per hour. If Xavier rides for 4 hours, how many kilometers will Ruby be behind him?
Solana's classroom has 30 students. If Solana and 2 friends are absent, and there are 20 students left in the classroom, how many students were absent in total?
Chef Freddy needed 120 meatballs for a party. He already made 40 and ordered 30 more from a supplier. How many meatballs does he still need to make?
If it takes 6 attempts to get to the top of the mountain, and John succeeds every 3 attempts, how many times will John get to the top of the mountain in 15 attempts?
Liza wins a competition and gets 200 dollars. If she gives 40 dollars to her brother and 20 dollars to her sister, how much money does she have left?
A snail is at the bottom of a 20-foot well. Each day, it climbs up 3 feet, but at night, it slips back 2 feet. How many days will it take for the snail to reach the top of the well?
Rachel and Mike are selling lemonade at a school event. Rachel sells 120 cups and Mike sells 30 more than Rachel. How many cups of lemonade did they sell in total?
Octavio spent 5 hours reading 10 chapters in his favorite book. How many hours would Octavio spend if he were to read the entire book which has 30 chapters?
Wakeman began with 250 marbles. After losing 10 marbles during recess, he gained 7 times as many marbles as he had before he started playing. How many marbles does Wakeman have in the end?
The math department ordered 350 pencils. If 20% of the pencils were blue, how many blue pencils were there?
Katarina is able to jump 5 times as high as Sofia. If Sofia jumps 4 feet, how high can Katarina jump?
Scott drives 5 miles north, then 2 miles east, and finally 1 mile south. How far is Scott from his original position?
Rachel lends a book to her five friends every week. Each book lasts for 8 weeks. If Rachel has 20 books, how many students will read her books considering no student reads the same book twice in a year?
In a school, 40% of the students are girls and 20% of the students are boys who wear glasses. If there are 180 students, how many students are girls who do not wear glasses?
Olivia can make 120 cookies in an hour. Her sister, Mia, can make 20 more cookies per hour than Olivia. If Olivia and Mia work together for 4 hours, how many cookies can they make in total?
Max has 3 bags of apples. Each bag contains 4 baskets. Each basket contains 6 apples. How many apples does Max have in total?
Julia has a piggy bank with 18 coins in it. Some coins are worth 1 dollar and some are worth 2 dollars. If the total worth of the coins is 34 dollars, how many coins are worth 2 dollars?
Dennis's cousin built a bookshelf with 12 rows of books. If each row holds 5 books, and he has 50 books already, how many more books will he need to fill the bookshelf?
Liv started the day with 100 stickers. She traded 25 stickers for 30 pennies. Then, she bought 4 stickers for 5 pennies each and won 15 stickers in a contest. How many stickers does Liv have at the end of the day?
The basketball team of Hawks has twice as many players as the basketball team of Eagles. If Eagles have 12 players, how many players do the two teams have together?
Diana's mom makes juice every Sunday. She makes 8 glasses of orange juice and 3 glasses of apple juice each Sunday. If she doesn't make juice for the next two Sundays, how many glasses of juice will she make in total in 5 weeks?
The population of San Francisco is 2000 more than the population of Los Angeles. Los Angeles has 3 times as many people as San Diego. If San Francisco has 8000 people, how many people are there in San Diego?
How many apples were in the basket after Mrs. Smith took 2/3 of them to the store, if the basket now has 15 apples remaining?
What is the average of all the numbers from 1 to 10, inclusive?
Mr. Johnson has $5000 to invest in stocks. He invests 3/5 of his money in a bond that returns 10% interest, and the remaining amount in a stock that returns 12% interest. How much money does Mr. Johnson earn in interest in one year?
The school’s basketball team has played 12 games, winning 1/3 of them. How many more games does the team need to win so that they have won at least half of all their games?
The dimensions of a room are 12 feet by 15 feet. What is the area of the room in square feet?
Sarah submitted a $2500 application to a grant. If 15 percent of the application falls under equipment how much does she need for equipment?
A bookstore has 150 books on a shelf. The manager adds 20 more books, and then 30 more. If 80 books are taken from the shelf, how many books are left?
If 30% of the students in a major are juniors and 20% of the students in that major are engineering students, what percentage of students are both juniors and engineers?
A manufacturing plant produces 1500 widgets per day. If production decreases by 12%, how many widgets will the plant produce per day?
Olivia invested in a restaurant for $10,000 and her sister invested in for $15,000. If they equally split the profits, what is Olivia's share if the profit is $7500?
Tyler can paint a fence in 5 hours and Ethan can paint it in 8 hours. Working together, how many hours would it take them to paint the fence?
Emily has $120 to spend on clothes. She bought a pair of shoes for $20, a dress for $30 and two shirts for $40. She gave her sister $20 and saved the rest. How much does Emily have left?
Tom has 15 books on his shelf. If he adds 5 more, then gives 3 away, and then buys 2 more, what is the total number of books Tom will have on his shelf?
James is hosting a party and wants to serve soda to all the guests. If he needs 3 bottles of soda for every 6 guests, and there are 24 guests coming, how many bottles of soda should James order?
At a school, 35 students are taking math, 45 students are taking science, and 15 students are taking both math and science. How many students are taking either math or science?
Tom is training for a marathon. He runs 4 miles on Monday, 3 miles on Tuesday, 5 miles on Wednesday, 5 miles on Thursday, and 6 miles on Friday. How many miles did Tom run in total?
[truncated: 4,867 more rows]
