# Supplementary material
Source: ML conference proceedings conference paper supplement (https://openreview.net/forum?id=8mM5NzC7da)
Supplement: supplementary_material [file OOD_samples_llama-3-70b-instruct_java_augmented_beaver-withresponses.xlsx]

## Sheet: Sheet
Questions	Answers
Write a function count_vowels that takes a string as input and returns the count of vowels in the string.	```java public class Main { public static int count_vowels(String str) { str = str.toLowerCase(); int count = 0; for(int i = 0; i < str.length(); i++) { char c = str.charAt(i); if(c == 'a' || c == 'e' || c == 'i' || c == 'o' || c == 'u') { count++; } } return count; } public static void main(String[] args) { System.out.println(count_vowels("Hello World")); } }
Write a function calculate_average that takes a list of integers as input and returns the average of the numbers in the list.	```java public class Main { public static double calculate_average(int[] arr) { int sum = 0; for(int i = 0; i < arr.length; i++) { sum += arr[i]; } return (double) sum / arr.length; } public static void main(String[] args) { int[] arr = {1, 2, 3, 4, 5}; System.out.println(calculate_average(arr)); } }
Write a function is_palindrome that takes a string as input and returns true if the string is a palindrome, false otherwise.	```java public class Main { public static boolean is_palindrome(String str) { str = str.replaceAll("\\s+", "").toLowerCase(); int i = 0, j = str.length() - 1; while(i < j) { if(str.charAt(i) != str.charAt(j)) { return false; } i++; j--; } return true; } public static void main(String[] args) { System.out.println(is_palindrome("A man a plan a canal Panama")); } }
Write a function find_largest that takes a list of integers as input and returns the largest number in the list.	```java public class Main { public static int find_largest(int[] arr) { int max = arr[0]; for(int i = 1; i < arr.length; i++) { if(arr[i] > max) { max = arr[i]; } } return max; } public static void main(String[] args) { int[] arr = {5, 2, 8, 3, 1}; System.out.println(find_largest(arr)); } }
Write a function reverse_string that takes a string as input and returns the reversed string.	```java public class Main { public static String reverse_string(String str) { String reversed = ""; for(int i = str.length() - 1; i >= 0; i--) { reversed += str.charAt(i); } return reversed; } public static void main(String[] args) { System.out.println(reverse_string("Hello World")); } }
Create a Java function that takes a list of strings as input and returns the list of strings with all strings in uppercase.	public class Main { public static List<String> toUppercase(List<String> strings) { List<String> result = new ArrayList<>(); for (String str : strings) { result.add(str.toUpperCase()); } return result; } }
Write a Java function that takes an integer as input and returns the factorial of the number.	public class Main { public static long factorial(int n) { long result = 1; for (int i = 2; i <= n; i++) { result *= i; } return result; } }
Create a Java function that takes a string as input and returns the string with all digits removed.	public class Main { public static String removeDigits(String str) { StringBuilder result = new StringBuilder(); for (char c : str.toCharArray()) { if (!Character.isDigit(c)) { result.append(c); } } return result.toString(); } }
Write a Java function that takes a list of integers as input and returns the maximum difference between any two elements in the list.	public class Main { public static int maxDifference(List<Integer> numbers) { int max = Collections.max(numbers); int min = Collections.min(numbers); return max - min; } }
Create a Java function that takes a string as input and returns true if the string contains only alphanumeric characters, false otherwise.	public class Main { public static boolean isAlphanumeric(String str) { for (char c : str.toCharArray()) { if (!Character.isLetterOrDigit(c)) { return false; } } return true; } }
Write a function that takes a string as an input and returns the string in uppercase.	```java public String toUpper(String str) { return str.toUpperCase(); }
Write a function that takes a list of integers as input and returns the count of the odd numbers in the list.	```java public int countOddNumbers(List<Integer> nums) { int count = 0; for (int num : nums) { if (num % 2 != 0) { count++; } } return count; }
Write a function that takes a string as an input and returns True if the string is a palindrome, and False otherwise.	```java public boolean isPalindrome(String str) { String reversed = new StringBuilder(str).reverse().toString(); return str.equals(reversed); }
Write a function that takes a list of strings as input and returns the longest string in the list.	```java public String longestString(List<String> strs) { String longest = ""; for (String str : strs) { if (str.length() > longest.length()) { longest = str; } } return longest; }
Write a function that takes a list of integers as input and returns the average of all the numbers in the list.	```java public double average(List<Integer> nums) { int sum = 0; for (int num : nums) { sum += num; } return (double) sum / nums.size(); }
Write a Java function that takes a string as input and returns the string with all vowels removed.	public String removeVowels(String input) { String vowels = "aeiouAEIOU"; StringBuilder output = new StringBuilder(); for (char c : input.toCharArray()) { if (!vowels.indexOf(String.valueOf(c)) >= 0) { output.append(c); } } return output.toString(); }
Write a Java function that takes an integer as input and returns true if the number is a prime number, false otherwise.	public boolean isPrime(int number) { if (number <= 1) { return false; } for (int i = 2; i <= Math.sqrt(number); i++) { if (number % i == 0) { return false; } } return true; }
Given a list of integers, write a Java function that returns the average of the list.	public double averageOfList(List<Integer> numbers) { int sum = 0; for (int num : numbers) { sum += num; } return (double) sum / numbers.size(); }
Write a Java function that takes a string as input and returns the string with all characters reversed.	public String reverseString(String input) { StringBuilder output = new StringBuilder(input); return output.reverse().toString(); }
You are given a list of strings and you need to write a Java function that returns the string that appears most frequently in the list.	public String mostFrequentString(List<String> strings) { Map<String, Integer> frequencyMap = new HashMap<>(); for (String str : strings) { frequencyMap.put(str, frequencyMap.getOrDefault(str, 0) + 1); } String mostFrequent = null; int maxFrequency = 0; for (Map.Entry<String, Integer> entry : frequencyMap.entrySet()) { if (entry.getValue() > maxFrequency) { maxFrequency = entry.getValue(); mostFre…
Write a Java function, that takes a list of integers and returns the count of the number of times a specific integer appears in the list.	public static int countIntegerAppearances(List<Integer> integerList, int targetInteger) { int count = 0; for (int integer : integerList) { if (integer == targetInteger) { count++; } } return count; }
Design a function that takes a string as input and returns the count of words in the string.	public class WordCounter { public static int countWords(String str) { if (str == null || str.trim().isEmpty()) { return 0; } return str.trim().split("\\s+").length; } }
Write a Java function that takes a list of integers as input and returns the second largest number in the list. If no such number exists, return -1.	public class SecondLargest { public static int findSecondLargest(List<Integer> list) { if (list == null || list.size() < 2) { return -1; } Collections.sort(list); return list.get(list.size() - 2); } }
Implement a Java function that takes two strings as input and returns true if the strings are anagrams of each other, false otherwise.	public class AnagramChecker { public static boolean areAnagrams(String str1, String str2) { if (str1 == null || str2 == null || str1.length() != str2.length()) { return false; } char[] arr1 = str1.toLowerCase().toCharArray(); char[] arr2 = str2.toLowerCase().toCharArray(); Arrays.sort(arr1); Arrays.sort(arr2); return Arrays.equals(arr1, arr2); } }
Design a function that takes a list of integers as input and returns the list with all even numbers removed.	public class EvenRemover { public static List<Integer> removeEvens(List<Integer> list) { List<Integer> result = new ArrayList<>(); for (int num : list) { if (num % 2 != 0) { result.add(num); } } return result; } }
Write a Java function that takes a string as input and returns true if the string is a palindrome, false otherwise.	public class PalindromeChecker { public static boolean isPalindrome(String str) { if (str == null) { return false; } int start = 0; int end = str.length() - 1; while (start < end) { if (str.charAt(start) != str.charAt(end)) { return false; } start++; end--; } return true; } }
Write a function that takes a list of integers as an input and returns the average of all the numbers in the list.	public double average(List<Integer> numbers) { int sum = 0; for (int number : numbers) { sum += number; } return (double) sum / numbers.size(); }
Implement a function that takes a string as an input and returns the string with all vowels removed.	public String removeVowels(String input) { String vowels = "aeiouAEIOU"; StringBuilder output = new StringBuilder(); for (char c : input.toCharArray()) { if (!vowels.indexOf(String.valueOf(c)) >= 0) { output.append(c); } } return output.toString(); }
Write a function that takes a list of strings as an input and returns the string with the maximum length.	public String longestString(List<String> strings) { String maxLengthString = ""; for (String str : strings) { if (str.length() > maxLengthString.length()) { maxLengthString = str; } } return maxLengthString; }
Implement a function that takes two lists of integers as an input and returns a new list containing the intersection of the two lists.	public List<Integer> intersection(List<Integer> list1, List<Integer> list2) { List<Integer> intersection = new ArrayList<>(); for (int num : list1) { if (list2.contains(num)) { intersection.add(num); } } return intersection; }
Write a function that takes a string as an input and returns true if the string is a palindrome and false otherwise.	public boolean isPalindrome(String input) { String reversed = new StringBuilder(input).reverse().toString(); return input.equals(reversed); }
Write a Java function that takes a string as an input and checks if it is a palindrome.	public boolean isPalindrome(String str) { int i = 0, j = str.length() - 1; while (i < j) { if (str.charAt(i) != str.charAt(j)) return false; i++; j--; } return true; }
Implement a Java function that takes a list of integers and returns a new list with all duplicates removed.	import java.util.ArrayList; import java.util.LinkedHashSet; public ArrayList<Integer> removeDuplicates(ArrayList<Integer> list) { LinkedHashSet<Integer> set = new LinkedHashSet<>(list); return new ArrayList<>(set); }
Write a Java function that takes a string as an input and checks if it contains any numbers.	public boolean hasNumbers(String str) { for (char c : str.toCharArray()) { if (Character.isDigit(c)) return true; } return false; }
Implement a Java function that takes a list of strings as input and returns a new list with all strings in uppercase.	public ArrayList<String> uppercaseStrings(ArrayList<String> list) { ArrayList<String> result = new ArrayList<>(); for (String str : list) { result.add(str.toUpperCase()); } return result; }
Write a Java function that takes a list of integers as an input and returns the count of all prime numbers in the list.	public int countPrimeNumbers(ArrayList<Integer> list) { int count = 0; for (int num : list) { if (isPrime(num)) count++; } return count; } public boolean isPrime(int num) { if (num <= 1) return false; for (int i = 2; i * i <= num; i++) { if (num % i == 0) return false; } return true; }
Create a Java function that determines whether a given number is even or odd. The function should return 'Even' if the number is even, and 'Odd' if the number is odd.	public static String isEvenOrOdd(int n) { if(n % 2 == 0) { return "Even"; } else { return "Odd"; } }
Write a Java function to find the largest word in a given string. The function should return the longest word in the string.	public static String findLargestWord(String str) { String[] words = str.split(" "); String largestWord = words[0]; for(String word : words) { if(word.length() > largestWord.length()) { largestWord = word; } } return largestWord; }
Create a Java function to determine whether a given string contains all unique characters. The function should return 'Yes' if all characters in the string are unique, and 'No' if there are duplicate characters.	public static String hasUniqueCharacters(String str) { boolean[] charSet = new boolean[256]; for(int i = 0; i < str.length(); i++) { int val = str.charAt(i); if(charSet[val]) return "No"; charSet[val] = true; } return "Yes"; }
Write a Java function to find the sum of digits of a given integer. The function should return the sum of digits in the integer.	public static int sumOfDigits(int n) { int sum = 0; while(n != 0) { sum += n % 10; n /= 10; } return sum; }
Create a Java function to count the number of occurrences of a given substring within a string. The function should return the count of occurrences of the substring in the string.	public static int countSubstring(String str, String sub) { int count = 0; int index = 0; while((index = str.indexOf(sub, index)) != -1) { count++; index += sub.length(); } return count; }
Implement a class called `Student` with attributes `name`, `age`, and `grade`, and methods `setGrade` and `getGrade`.	```java public class Student { private String name; private int age; private double grade; public Student(String name, int age, double grade) { this.name = name; this.age = age; this.grade = grade; } public void setGrade(double grade) { this.grade = grade; } public double getGrade() { return this.grade; } }
Write a function that takes an array of integers and returns the second largest number in the array.	```java public int secondLargestNumber(int[] arr) { int max = Integer.MIN_VALUE; int secondMax = Integer.MIN_VALUE; for (int num : arr) { if (num > max) { secondMax = max; max = num; } else if (num > secondMax && num != max) { secondMax = num; } } return secondMax; }
Implement a method that takes a string as input and returns the string in uppercase.	```java public String toUpperCase(String str) { return str.toUpperCase(); }
Write a function that calculates the sum of the digits of a given positive integer.	```java public int sumOfDigits(int num) { int sum = 0; while (num > 0) { sum += num % 10; num /= 10; } return sum; }
Implement a class called `Circle` with attributes `radius` and methods `area` and `circumference`.	```java public class Circle { private double radius; public Circle(double radius) { this.radius = radius; } public double area() { return Math.PI * radius * radius; } public double circumference() { return 2 * Math.PI * radius; } }
Develop a Java function that calculates the average of all elements in a given array of integers.	```java public class Main { public static double calculateAverage(int[] numbers) { int sum = 0; for (int number : numbers) { sum += number; } return (double) sum / numbers.length; } public static void main(String[] args) { int[] numbers = {2, 4, 6, 8, 10}; System.out.println("Average is " + calculateAverage(numbers)); } }
Write a Java function to convert a temperature from Celsius to Fahrenheit.	```java public class Main { public static double celsiusToFahrenheit(double celsius) { return (celsius * 9 / 5) + 32; } public static void main(String[] args) { double celsius = 30.0; System.out.println(celsius + " degrees Celsius is " + celsiusToFahrenheit(celsius) + " degrees Fahrenheit"); } }
Create a Java function that takes a string as input and returns the string in uppercase.	```java public class Main { public static String toUpperCase(String str) { return str.toUpperCase(); } public static void main(String[] args) { String str = "hello"; System.out.println(str + " in uppercase is " + toUpperCase(str)); } }
Design a Java function that accepts a list of integers as input and returns the maximum number in the list.	```java import java.util.Arrays; public class Main { public static int findMax(int[] numbers) { return Arrays.stream(numbers).max().getAsInt(); } public static void main(String[] args) { int[] numbers = {2, 4, 6, 8, 10}; System.out.println("Maximum number is " + findMax(numbers)); } }
Write a Java function that takes a list of strings as input and returns a new list with all strings in lowercase.	```java import java.util.ArrayList; import java.util.List; public class Main { public static List<String> toLowerCase(List<String> strs) { List<String> lowerCaseStrs = new ArrayList<>(); for (String str : strs) { lowerCaseStrs.add(str.toLowerCase()); } return lowerCaseStrs; } public static void main(String[] args) { List<String> strs = Arrays.asList("Hello", "WORLD", "Java"); List<String> lowerCa…
Write a function that takes a string as an input and returns the string with the characters in reverse order.	public static String reverseString(String str) { String reversed = new StringBuilder(str).reverse().toString(); return reversed; }
Write a function that takes a list of integers as input and returns the sum of squares of each integer in the list.	public static int sumOfSquares(List<Integer> list) { int sum = 0; for (int num : list) { sum += num * num; } return sum; }
Given a string, write a function that returns the frequency of each word in the string.	public static Map<String, Integer> wordFrequency(String str) { String[] words = str.split(" "); Map<String, Integer> frequency = new HashMap<>(); for (String word : words) { frequency.put(word, frequency.getOrDefault(word, 0) + 1); } return frequency; }
Write a function that takes an integer as input and returns the sum of its digits.	public static int sumOfDigits(int num) { int sum = 0; while (num != 0) { sum += num % 10; num /= 10; } return sum; }
Given a list of strings, write a function that returns the list sorted in alphabetical order.	public static List<String> sortStrings(List<String> list) { Collections.sort(list); return list; }
Write a function that takes a list of integers as input and returns the list with all duplicates removed.	public static List<Integer> removeDuplicates(List<Integer> list) { Set<Integer> set = new HashSet<>(list); return new ArrayList<>(set); }
Write a function that takes two integers as input and returns their greatest common divisor (GCD).	public int findGCD(int a, int b) { if (b == 0) { return a; } else { return findGCD(b, a % b); } }
Write a function that takes a list of integers as input and returns the average of all the integers in the list.	public double findAverage(List<Integer> list) { int sum = 0; for (int num : list) { sum += num; } return (double) sum / list.size(); }
Write a function that takes a string as input and returns the string with all vowels removed.	public String removeVowels(String str) { String vowels = "aeiouAEIOU"; StringBuilder result = new StringBuilder(); for (char c : str.toCharArray()) { if (!vowels.indexOf(c) >= 0) { result.append(c); } } return result.toString(); }
Write a function that takes a list of strings as input and returns the length of the longest string in the list.	public int findLongestLength(List<String> list) { int maxLength = 0; for (String str : list) { if (str.length() > maxLength) { maxLength = str.length(); } } return maxLength; }
Write a function that takes a list of integers as input and returns the list with all duplicates removed.	public List<Integer> removeDuplicates(List<Integer> list) { Set<Integer> set = new HashSet<>(list); return new ArrayList<>(set); }
Write a function `calculate_average` that takes a list of integers as an input and returns the average value of the list.	``` public class Main { public static double calculate_average(int[] list) { int sum = 0; for (int num : list) { sum += num; } return (double) sum / list.length; } public static void main(String[] args) { int[] list = {1, 2, 3, 4, 5}; System.out.println(calculate_average(list)); } }
Given a string, write a function that returns a new string with all vowels removed.	``` public class Main { public static String remove_vowels(String str) { str = str.replaceAll("[aeiouAEIOU]", ""); return str; } public static void main(String[] args) { String str = "Hello World!"; System.out.println(remove_vowels(str)); } }
Write a function `find_max` that takes a list of integers as an input and returns the maximum value in the list.	``` public class Main { public static int find_max(int[] list) { int max = list[0]; for (int num : list) { if (num > max) { max = num; } } return max; } public static void main(String[] args) { int[] list = {10, 20, 30, 40, 50}; System.out.println(find_max(list)); } }
Given a string, write a function that returns the string in reverse order.	``` public class Main { public static String reverse_string(String str) { String reversed = ""; for (int i = str.length() - 1; i >= 0; i--) { reversed += str.charAt(i); } return reversed; } public static void main(String[] args) { String str = "Hello World!"; System.out.println(reverse_string(str)); } }
Write a function `check_armstrong` that takes an integer as an input and returns true if the number is an Armstrong number, false otherwise.	``` public class Main { public static boolean check_armstrong(int num) { int sum = 0; int temp = num; while (temp != 0) { int digit = temp % 10; sum += Math.pow(digit, String.valueOf(num).length()); temp /= 10; } return sum == num; } public static void main(String[] args) { int num = 371; System.out.println(check_armstrong(num)); } }
Implement a function to extract all the digits from a given string and return them as a single integer.	```java public int extractDigits(String str) { StringBuilder digits = new StringBuilder(); for (char c : str.toCharArray()) { if (Character.isDigit(c)) { digits.append(c); } } return Integer.parseInt(digits.toString()); }
Create a Java function that takes an array of integers as input and returns the array with all the elements reversed.	```java public int[] reverseArray(int[] arr) { int start = 0; int end = arr.length - 1; while (start < end) { int temp = arr[start]; arr[start] = arr[end]; arr[end] = temp; start++; end--; } return arr; }
Write a Java function to remove all the vowels from a given string.	```java public String removeVowels(String str) { StringBuilder result = new StringBuilder(); for (char c : str.toLowerCase().toCharArray()) { if (c != 'a' && c != 'e' && c != 'i' && c != 'o' && c != 'u') { result.append(c); } } return result.toString(); }
Implement a function to find the maximum difference between any two elements in a given array.	```java public int maxDifference(int[] arr) { if (arr.length < 2) { return 0; } int max = arr[0]; int min = arr[0]; for (int i = 1; i < arr.length; i++) { if (arr[i] > max) { max = arr[i]; } if (arr[i] < min) { min = arr[i]; } } return max - min; }
Write a Java function to count the occurrences of each character in a given string.	```java public Map<Character, Integer> countCharacters(String str) { Map<Character, Integer> charCount = new HashMap<>(); for (char c : str.toCharArray()) { if (charCount.containsKey(c)) { charCount.put(c, charCount.get(c) + 1); } else { charCount.put(c, 1); } } return charCount; }
Write a function that takes a string as input and returns the string with all vowels removed. If the input string is null, return null.	public static String removeVowels(String str) { if (str == null) return null; String vowels = "aeiouAEIOU"; StringBuilder result = new StringBuilder(); for (char c : str.toCharArray()) { if (vowels.indexOf(c) == -1) { result.append(c); } } return result.toString(); }
Write a function that takes a list of integers as input and returns the product of all the numbers in the list. If the list is empty, return 1.	public static int productOfNumbers(List<Integer> nums) { int product = 1; for (int num : nums) { product *= num; } return product; }
Given a list of integers, write a function that returns the count of numbers that are perfect squares. A perfect square is a number that can be expressed as the square of an integer. For example, 1, 4, 9, 16 are perfect squares.	public static int countPerfectSquares(List<Integer> nums) { int count = 0; for (int num : nums) { double sqrt = Math.sqrt(num); if (sqrt == (int) sqrt) { count++; } } return count; }
Write a function that takes a string as input and returns the string with all characters in uppercase. If the input string is null, return null.	public static String toUpperCase(String str) { if (str == null) return null; return str.toUpperCase(); }
You are given a list of integers. Write a function that returns the difference between the maximum and minimum numbers in the list. If the list is empty, return 0.	public static int maxMinusMin(List<Integer> nums) { if (nums.isEmpty()) return 0; int max = Collections.max(nums); int min = Collections.min(nums); return max - min; }
Write a function called calculate_median that takes a list of integers as input and returns the median of the list.	```java public class Main { public static double calculate_median(List<Integer> list) { Collections.sort(list); int size = list.size(); if (size % 2 == 0) { int mid1 = list.get(size / 2 - 1); int mid2 = list.get(size / 2); return (mid1 + mid2) / 2.0; } else { return list.get(size / 2); } } public static void main(String[] args) { } }
Write a function that takes a list of strings as input and returns the longest string in the list.	```java public class Main { public static String find_longest_string(List<String> list) { String longest = ""; for (String str : list) { if (str.length() > longest.length()) { longest = str; } } return longest; } public static void main(String[] args) { } }
Write a function called count_vowels that takes a string as input and returns the total count of vowels in the string.	```java public class Main { public static int count_vowels(String str) { str = str.toLowerCase(); int count = 0; for (char c : str.toCharArray()) { if (c == 'a' || c == 'e' || c == 'i' || c == 'o' || c == 'u') { count++; } } return count; } public static void main(String[] args) { } }
Write a function that takes a list of integers as input and returns the count of all prime numbers in the list.	```java public class Main { public static int count_primes(List<Integer> list) { int count = 0; for (int num : list) { if (isPrime(num)) { count++; } } return count; } public static boolean isPrime(int num) { if (num <= 1) { return false; } for (int i = 2; i <= Math.sqrt(num); i++) { if (num % i == 0) { return false; } } return true; } public static void main(String[] args) { } }
Write a function that takes a list of strings as input and returns a new list with all strings converted to uppercase.	```java public class Main { public static List<String> to_uppercase(List<String> list) { List<String> result = new ArrayList<>(); for (String str : list) { result.add(str.toUpperCase()); } return result; } public static void main(String[] args) { } }
Write a Java function that takes a list of integers as input and returns the sum of all even numbers in the list.	```java import java.util.*; public class Main { public static int sumOfEvenNumbers(List<Integer> numbers) { int sum = 0; for (int number : numbers) { if (number % 2 == 0) { sum += number; } } return sum; } }
Create a Java function that takes a string as input and returns a new string with all uppercase letters shifted to lowercase and all lowercase letters shifted to uppercase.	```java public class Main { public static String swapCase(String str) { StringBuilder result = new StringBuilder(); for (char c : str.toCharArray()) { if (Character.isUpperCase(c)) { result.append(Character.toLowerCase(c)); } else if (Character.isLowerCase(c)) { result.append(Character.toUpperCase(c)); } else { result.append(c); } } return result.toString(); } }
You are given a list of strings that contain a mix of alphanumeric characters and special characters. Write a Java function that takes this list as input and returns a list containing the count of alphanumeric characters and the count of special characters for each string.	```java import java.util.*; public class Main { public static List<int[]> countCharacters(List<String> strings) { List<int[]> result = new ArrayList<>(); for (String str : strings) { int alphanumericCount = 0; int specialCount = 0; for (char c : str.toCharArray()) { if (Character.isLetterOrDigit(c)) { alphanumericCount++; } else { specialCount++; } } result.add(new int[]{alphanumericCount, specia…
Implement a Java function that takes a list of integers as input and returns the sum of the squares of all numbers in the list.	```java import java.util.*; public class Main { public static int sumOfSquares(List<Integer> numbers) { int sum = 0; for (int number : numbers) { sum += number * number; } return sum; } }
Create a Java function that takes a string as input and returns the count of words in the string, where a word is defined as a sequence of alphanumeric characters separated by spaces.	```java public class Main { public static int countWords(String str) { String[] words = str.split("\\s+"); return words.length; } }
Write a function that takes a list of strings and returns the longest string that starts with a given prefix.	```java public static String longestStringWithPrefix(List<String> strings, String prefix) { String longest = ""; for (String str : strings) { if (str.startsWith(prefix) && str.length() > longest.length()) { longest = str; } } return longest; }
Develop a function to find the sum of the squares of the first n natural numbers.	```java public static int sumOfSquares(int n) { int sum = 0; for (int i = 1; i <= n; i++) { sum += i * i; } return sum; }
Write a function that takes a list of integers and returns the count of numbers divisible by 3 or 5 but not both.	```java public static int countDivisibleBy3or5(List<Integer> numbers) { int count = 0; for (int num : numbers) { if ((num % 3 == 0 && num % 5 != 0) || (num % 3 != 0 && num % 5 == 0)) { count++; } } return count; }
Create a function that takes a list of integers and returns a new list with the elements grouped into sublists of consecutive numbers.	```java public static List<List<Integer>> groupConsecutiveNumbers(List<Integer> numbers) { List<List<Integer>> result = new ArrayList<>(); List<Integer> currentGroup = new ArrayList<>(); for (int num : numbers) { if (currentGroup.isEmpty() || currentGroup.get(currentGroup.size() - 1) + 1 == num) { currentGroup.add(num); } else { result.add(currentGroup); currentGroup = new ArrayList<>(); currentG…
Write a function that takes a string and returns the frequency of each character in the string.	```java public static Map<Character, Integer> charFrequency(String str) { Map<Character, Integer> frequency = new HashMap<>(); for (char c : str.toCharArray()) { frequency.put(c, frequency.getOrDefault(c, 0) + 1); } return frequency; }
Write a function that takes two integers as input and returns their greatest common divisor (GCD).	public class Main { public static int gcd(int num1, int num2) { if (num2 == 0) { return num1; } else { return gcd(num2, num1 % num2); } } public static void main(String[] args) { System.out.println(gcd(48, 18)); } }
Write a function that takes a list of strings as input and returns the string with the maximum length.	public class Main { public static String maxLengthString(String[] arr) { String maxLengthStr = ""; for (String str : arr) { if (str.length() > maxLengthStr.length()) { maxLengthStr = str; } } return maxLengthStr; } public static void main(String[] args) { String[] arr = {"apple", "banana", "orange"}; System.out.println(maxLengthString(arr)); } }
Write a function that takes a string as input and returns the string with all characters converted to uppercase.	public class Main { public static String toUpperCase(String str) { return str.toUpperCase(); } public static void main(String[] args) { System.out.println(toUpperCase("hello world")); } }
Write a function that takes a list of integers as input and returns the second largest number in the list.	public class Main { public static int secondLargest(int[] arr) { int largest = Integer.MIN_VALUE; int secondLargest = Integer.MIN_VALUE; for (int num : arr) { if (num > largest) { secondLargest = largest; largest = num; } else if (num > secondLargest && num != largest) { secondLargest = num; } } return secondLargest; } public static void main(String[] args) { int[] arr = {5, 10, 20, 8, 12}; Syste…
Write a function that takes a string as input and returns the number of occurrences of the substring "hello" in the string.	public class Main { public static int countHello(String str) { int count = 0; int index = 0; while ((index = str.indexOf("hello", index)) != -1) { count++; index += 5; } return count; } public static void main(String[] args) { System.out.println(countHello("hello world, hello again")); } }
Write a function to find the count of all even numbers in a given array of integers.	public int countEvenNumbers(int[] arr) { int count = 0; for (int i = 0; i < arr.length; i++) { if (arr[i] % 2 == 0) { count++; } } return count; }
Write a function that takes a string as an input and returns the string with all occurrences of a specific word removed.	public String removeWord(String str, String word) { String[] arr = str.split(" "); StringBuilder sb = new StringBuilder(); for (String s : arr) { if (!s.equals(word)) { sb.append(s).append(" "); } } return sb.toString().trim(); }
Write a function to find the maximum difference between two elements in a given array of integers.	public int maxDifference(int[] arr) { int maxDiff = arr[1] - arr[0]; int min = arr[0]; for (int i = 1; i < arr.length; i++) { if (arr[i] - min > maxDiff) { maxDiff = arr[i] - min; } if (arr[i] < min) { min = arr[i]; } } return maxDiff; }
Write a function that takes two arrays of integers as input and returns true if they contain the same elements, regardless of order.	import java.util.Arrays; public boolean sameElements(int[] arr1, int[] arr2) { if (arr1.length != arr2.length) { return false; } Arrays.sort(arr1); Arrays.sort(arr2); for (int i = 0; i < arr1.length; i++) { if (arr1[i] != arr2[i]) { return false; } } return true; }
Write a function that takes a string as an input and returns the string with all characters shifted one position to the right.	public String shiftString(String str) { StringBuilder sb = new StringBuilder(); for (int i = 0; i < str.length() - 1; i++) { sb.append(str.charAt(i + 1)); } sb.append(str.charAt(0)); return sb.toString(); }
Create a function `count_even_numbers` that takes a list of integers as input and returns the count of even numbers in the list.	public int countEvenNumbers(List<Integer> numbers) { int count = 0; for (int num : numbers) { if (num % 2 == 0) { count++; } } return count; }
Develop a Java program to find the maximum consecutive sum of a list of integers.	public int maxConsecutiveSum(List<Integer> numbers) { int maxSum = Integer.MIN_VALUE; int currentSum = 0; for (int num : numbers) { currentSum += num; maxSum = Math.max(maxSum, currentSum); if (currentSum < 0) { currentSum = 0; } } return maxSum; }
Write a Java program that takes a string as an input and returns the string with all occurrences of a specified character removed.	public String removeCharacter(String str, char c) { StringBuilder result = new StringBuilder(); for (char ch : str.toCharArray()) { if (ch != c) { result.append(ch); } } return result.toString(); }
Write a function that takes a list of integers as input and returns the second largest number in the list.	public int secondLargestNumber(List<Integer> numbers) { int max = Integer.MIN_VALUE; int secondMax = Integer.MIN_VALUE; for (int num : numbers) { if (num > max) { secondMax = max; max = num; } else if (num > secondMax && num != max) { secondMax = num; } } return secondMax; }
Create a function `check_palindrome` that takes a string as input and returns true if the string is a palindrome and false otherwise.	public boolean checkPalindrome(String str) { String reversedStr = new StringBuilder(str).reverse().toString(); return str.equals(reversedStr); }
Create a Java function to find the number of times a target sum can be made using the given list of integers with repetition allowed.	```java public int countSum(int[] nums, int targetSum) { int[] dp = new int[targetSum + 1]; dp[0] = 1; for (int num : nums) { for (int i = num; i <= targetSum; i++) { dp[i] += dp[i - num]; } } return dp[targetSum]; }
Write a Java function that takes a string as input and returns the number of vowels in the string.	```java public int countVowels(String str) { int count = 0; for (char c : str.toCharArray()) { switch (Character.toLowerCase(c)) { case 'a': case 'e': case 'i': case 'o': case 'u': count++; } } return count; }
Implement a Java function that takes a list of integers as input and returns the count of pairs of integers that have a difference of 1.	```java public int countDiffOnePairs(int[] nums) { Map<Integer, Integer> countMap = new HashMap<>(); for (int num : nums) { countMap.put(num, countMap.getOrDefault(num, 0) + 1); } int count = 0; for (int num : countMap.keySet()) { count += countMap.getOrDefault(num - 1, 0) * countMap.getOrDefault(num, 0); } return count; }
Write a Java function that takes a matrix as input and returns the maximum value in the matrix.	```java public int findMaxInMatrix(int[][] matrix) { int max = Integer.MIN_VALUE; for (int[] row : matrix) { for (int num : row) { max = Math.max(max, num); } } return max; }
Create a Java function to find the first duplicate in a given list of integers.	```java public int findFirstDuplicate(int[] nums) { Set<Integer> seen = new HashSet<>(); for (int num : nums) { if (seen.contains(num)) { return num; } seen.add(num); } return -1; // Return -1 if no duplicate found }
Create a function to find the maximum value in a given array of integers.	```java public class Main { public static int findMax(int[] arr) { int max = arr[0]; for (int i = 1; i < arr.length; i++) { if (arr[i] > max) { max = arr[i]; } } return max; } public static void main(String[] args) { int[] arr = {4, 2, 9, 6}; System.out.println("Maximum value in the array is " + findMax(arr)); } }
Write a function to check if a given string contains at least one uppercase letter.	```java public class Main { public static boolean hasUppercase(String str) { for (int i = 0; i < str.length(); i++) { if (Character.isUpperCase(str.charAt(i))) { return true; } } return false; } public static void main(String[] args) { String str = "Hello World"; System.out.println("The string has at least one uppercase letter: " + hasUppercase(str)); } }
Create a function to calculate the average of a list of decimal numbers.	```java public class Main { public static double calculateAverage(double[] numbers) { double sum = 0; for (double num : numbers) { sum += num; } return sum / numbers.length; } public static void main(String[] args) { double[] numbers = {10.5, 20.2, 30.1, 40.8}; System.out.println("The average is " + calculateAverage(numbers)); } }
Write a function to find the index of the first occurrence of a specified element in a given array.	```java public class Main { public static int findIndex(int[] arr, int target) { for (int i = 0; i < arr.length; i++) { if (arr[i] == target) { return i; } } return -1; // Return -1 if the element is not found } public static void main(String[] args) { int[] arr = {4, 2, 9, 6}; int target = 9; System.out.println("The index of the element is " + findIndex(arr, target)); } }
Create a function to count the number of vowels in a given string.	```java public class Main { public static int countVowels(String str) { int count = 0; for (int i = 0; i < str.length(); i++) { char ch = str.charAt(i); if (ch == 'a' || ch == 'e' || ch == 'i' || ch == 'o' || ch == 'u' || ch == 'A' || ch == 'E' || ch == 'I' || ch == 'O' || ch == 'U') { count++; } } return count; } public static void main(String[] args) { String str = "Hello World"; System.out.pri…
Implement a Java function that takes a list of integers as input and returns the count of elements less than or equal to 0.	```java public int countNonPositiveNumbers(List<Integer> numbers) { int count = 0; for (int num : numbers) { if (num <= 0) { count++; } } return count; }
Write a function called get_largest_avg that takes a list of lists of integers as input and returns the list with the largest average value.	```java public List<Integer> getLargestAvg(List<List<Integer>> listOfLists) { double maxAvg = Double.MIN_VALUE; List<Integer> result = null; for (List<Integer> list : listOfLists) { double sum = 0; for (int num : list) { sum += num; } double avg = sum / list.size(); if (avg > maxAvg) { maxAvg = avg; result = list; } } return result; }
Implement a Java function that takes a list of strings as input and returns the count of strings that start with a vowel (both lowercase and uppercase).	```java public int countVowelStrings(List<String> strings) { int count = 0; for (String str : strings) { char firstChar = str.charAt(0); if ("AEIOUaeiou".indexOf(firstChar) != -1) { count++; } } return count; }
Write a function called find_closest_multiple that takes an integer as input and returns the closest multiple of 10.	```java public int findClosestMultiple(int num) { int multiple = (num / 10) * 10; if (num - multiple >= 5) { multiple += 10; } return multiple; }
Implement a Java function that takes a list of integers as input and returns a new list that contains the squares of the input list elements.	```java public List<Integer> getSquareList(List<Integer> numbers) { List<Integer> squareList = new ArrayList<>(); for (int num : numbers) { squareList.add(num * num); } return squareList; }
Create a Java function that takes a string as input and returns the frequency of each character in the string.	```java import java.util.HashMap; import java.util.Map; public class Main { public static Map<Character, Integer> getCharacterFrequency(String str) { Map<Character, Integer> frequencyMap = new HashMap<>(); for (char c : str.toCharArray()) { if (frequencyMap.containsKey(c)) { frequencyMap.put(c, frequencyMap.get(c) + 1); } else { frequencyMap.put(c, 1); } } return frequencyMap; } }
Write a Java function that takes a list of strings as input and returns the longest string in the list.	```java import java.util.Arrays; import java.util.List; public class Main { public static String getLongestString(List<String> strList) { return strList.stream().max((s1, s2) -> s1.length() - s2.length()).orElse(""); } }
Create a Java function that takes a list of integers as input and returns the product of all even numbers in the list.	```java import java.util.List; import java.util.stream.Collectors; public class Main { public static int productOfEvenNumbers(List<Integer> numList) { List<Integer> evenNumbers = numList.stream().filter(n -> n % 2 == 0).collect(Collectors.toList()); int product = 1; for (int num : evenNumbers) { product *= num; } return product; } }
Write a Java function that takes a string as input and returns True if the string is a palindrome, False otherwise.	```java public class Main { public static boolean isPalindrome(String str) { String reversedStr = new StringBuilder(str).reverse().toString(); return str.equals(reversedStr); } }
Create a Java function that takes a list of integers as input and returns the sum of all prime numbers in the list.	```java import java.util.List; public class Main { public static boolean isPrime(int num) { if (num <= 1) { return false; } for (int i = 2; i * i <= num; i++) { if (num % i == 0) { return false; } } return true; } public static int sumOfPrimeNumbers(List<Integer> numList) { int sum = 0; for (int num : numList) { if (isPrime(num)) { sum += num; } } return sum; } }
Write a function that takes a list of integers as input and returns the count of odd numbers in the list.	public int countOddNumbers(List<Integer> numbers) { int count = 0; for (int num : numbers) { if (num % 2 != 0) { count++; } } return count; }
Write a function that takes a string as input and returns the string without all vowels.	public String removeVowels(String str) { String vowels = "aeiouAEIOU"; String result = ""; for (char c : str.toCharArray()) { if (!vowels.contains(String.valueOf(c))) { result += c; } } return result; }
Write a function that takes two integer arrays as input and returns true if the sum of elements in both arrays is equal, false otherwise.	public boolean equalArraySum(int[] arr1, int[] arr2) { int sum1 = 0; int sum2 = 0; for (int num : arr1) { sum1 += num; } for (int num : arr2) { sum2 += num; } return sum1 == sum2; }
Write a function that takes a string as input and returns the longest prefix that is also a suffix.	public String longestPrefixSuffix(String str) { String prefix = ""; for (int i = 0; i < str.length() / 2; i++) { if (str.startsWith(str.substring(i + 1))) { prefix = str.substring(0, i + 1); } } return prefix; }
Write a function that takes a list of strings as input and returns the count of strings with more than 5 characters.	public int countLongStrings(List<String> strings) { int count = 0; for (String str : strings) { if (str.length() > 5) { count++; } } return count; }
Write a function that takes a string as input and returns true if the string is a palindrome, false otherwise.	public boolean isPalindrome(String s) { String reversed = new StringBuilder(s).reverse().toString(); return s.equals(reversed); }
Write a function that takes a list of integers as input and returns a new list containing only the unique elements.	public List<Integer> uniqueElements(List<Integer> list) { Set<Integer> set = new HashSet<>(list); return new ArrayList<>(set); }
Write a function that takes two lists of integers as input and returns the intersection of the two lists.	public List<Integer> intersection(List<Integer> list1, List<Integer> list2) { Set<Integer> set1 = new HashSet<>(list1); Set<Integer> set2 = new HashSet<>(list2); set1.retainAll(set2); return new ArrayList<>(set1); }
Write a function that takes a list of strings as input and returns the list sorted in lexicographical order.	public List<String> sortStrings(List<String> list) { Collections.sort(list); return list; }
Write a function that takes a list of integers as input and returns the second largest element in the list.	public int secondLargest(List<Integer> list) { Set<Integer> set = new HashSet<>(list); if(set.size() < 2) { return -1; } List<Integer> sortedList = new ArrayList<>(set); Collections.sort(sortedList); return sortedList.get(sortedList.size() - 2); }
Write a function count_vowels that takes a string as input and returns the count of vowels in the string.	public int countVowels(String str) { str = str.toLowerCase(); int count = 0; for (int i = 0; i < str.length(); i++) { char c = str.charAt(i); if (c == 'a' || c == 'e' || c == 'i' || c == 'o' || c == 'u') { count++; } } return count; }
Write a function calculate_median that takes a list of integers as input and returns the median of the list.	import java.util.*; public double calculateMedian(List<Integer> list) { Collections.sort(list); int size = list.size(); if (size % 2 == 0) { return (list.get(size / 2 - 1) + list.get(size / 2)) / 2.0; } else { return list.get(size / 2); } }
Write a function validate_pin that takes a string as input and returns true if the string represents a valid PIN code and false otherwise.	public boolean validatePin(String pin) { if (pin.length() != 4) { return false; } for (int i = 0; i < pin.length(); i++) { if (!Character.isDigit(pin.charAt(i))) { return false; } } return true; }
Write a function reverse_words that takes a string as input and returns a new string with the words reversed.	public String reverseWords(String str) { String[] words = str.split(" "); StringBuilder reversed = new StringBuilder(); for (int i = words.length - 1; i >= 0; i--) { reversed.append(words[i]).append(" "); } return reversed.toString().trim(); }
Write a function to_uppercase that takes a string as input and returns a new string with all characters converted to uppercase.	public String toUppercase(String str) { return str.toUpperCase(); }
Implement a class called `Rectangle` with attributes `length` and `width`, and methods `area` and `perimeter`. The `area` method should return the product of the length and width, and the `perimeter` method should return the sum of all sides of the rectangle.	```java public class Rectangle { private double length; private double width; public Rectangle(double length, double width) { this.length = length; this.width = width; } public double area() { return length * width; } public double perimeter() { return 2 * (length + width); } }
Write a function that takes a string as input and returns the string with all vowels removed.	```java public static String removeVowels(String input) { String vowels = "aeiouAEIOU"; StringBuilder result = new StringBuilder(); for (char c : input.toCharArray()) { if (!vowels.contains(String.valueOf(c))) { result.append(c); } } return result.toString(); }
You need to write a function that takes a list of integers as input and returns the sum of all even numbers in the list.	```java public static int sumOfEvenNumbers(int[] numbers) { int sum = 0; for (int number : numbers) { if (number % 2 == 0) { sum += number; } } return sum; }
Implement a class called `Stopwatch` with methods `start`, `stop`, and `elapsedTime`. The `start` method should record the current time, the `stop` method should record the current time, and the `elapsedTime` method should return the difference between the stop time and the start time.	```java import java.util.concurrent.TimeUnit; public class Stopwatch { private long startTime; private long endTime; public void start() { startTime = System.currentTimeMillis(); } public void stop() { endTime = System.currentTimeMillis(); } public long elapsedTime() { return endTime - startTime; } public String elapsedTimeString() { long elapsedTime = elapsedTime(); return String.format("%d min,…
You need to write a function that takes a string as input and returns the string with all characters in reverse order.	```java public static String reverseString(String input) { StringBuilder result = new StringBuilder(input); return result.reverse().toString(); }
Write a function that takes a list of integers and returns the number of primes in the list.	```java public int countPrimes(List<Integer> numbers) { int count = 0; for (int num : numbers) { if (isPrime(num)) { count++; } } return count; } public boolean isPrime(int number) { if (number <= 1) { return false; } for (int i = 2; i * i <= number; i++) { if (number % i == 0) { return false; } } return true; }
Write a function that takes a string and returns a new string with all vowels removed.	```java public String removeVowels(String str) { return str.replaceAll("[aeiouAEIOU]", ""); }
Write a function that takes a list of integers and returns the second smallest number in the list.	```java public int secondSmallest(List<Integer> numbers) { if (numbers.size() < 2) { throw new RuntimeException("List must contain at least two elements"); } Collections.sort(numbers); return numbers.get(1); }
Write a function that takes a list of strings and returns the string with the highest number of characters.	```java public String longestString(List<String> strings) { if (strings.isEmpty()) { throw new RuntimeException("List must not be empty"); } String longest = strings.get(0); for (String str : strings) { if (str.length() > longest.length()) { longest = str; } } return longest; }
Write a function that takes a list of integers and returns true if the list contains an even number of odd numbers, false otherwise.	```java public boolean hasEvenOddNumbers(List<Integer> numbers) { int count = 0; for (int num : numbers) { if (num % 2 != 0) { count++; } } return count % 2 == 0; }
Create a function called 'count_evensGreater5' that takes a list of integers as input and returns the count of all even numbers greater than 5 in the list.	public int count_evensGreater5(List<Integer> numList) { int count = 0; for (int num : numList) { if (num > 5 && num % 2 == 0) { count++; } } return count; }
Write a function called 'filter_strings' that takes a list of strings as input and returns a new list containing only the strings with lengths greater than 5.	public List<String> filter_strings(List<String> stringList) { List<String> newList = new ArrayList<>(); for (String str : stringList) { if (str.length() > 5) { newList.add(str); } } return newList; }
Write a function called 'calculate_average' that takes a list of integers as input and returns the average value of the list.	public double calculate_average(List<Integer> numList) { int sum = 0; for (int num : numList) { sum += num; } return (double) sum / numList.size(); }
Create a function called 'remove_duplicates' that takes a list of integers as input and returns a new list containing only the unique elements.	public List<Integer> remove_duplicates(List<Integer> numList) { List<Integer> newList = new ArrayList<>(); for (int num : numList) { if (!newList.contains(num)) { newList.add(num); } } return newList; }
Write a function called 'count_characters' that takes a string input as an argument and returns the count of characters in the string, excluding spaces.	public int count_characters(String str) { int count = 0; for (char c : str.toCharArray()) { if (c != ' ') { count++; } } return count; }
Write a Java function that takes a string as input and returns the string with all vowels removed.	```java public String removeVowels(String str) { String vowels = "aeiouAEIOU"; StringBuilder result = new StringBuilder(); for (char c : str.toCharArray()) { if (!vowels.indexOf(String.valueOf(c)) != -1) { result.append(c); } } return result.toString(); }
Implement a function that calculates the average of all numbers in a given list of integers.	```java public double calculateAverage(List<Integer> numbers) { if (numbers.isEmpty()) { return 0.0; } int sum = 0; for (int number : numbers) { sum += number; } return (double) sum / numbers.size(); }
Write a Java function that takes two strings as input and returns true if the two strings are anagrams of each other, false otherwise.	```java public boolean areAnagrams(String str1, String str2) { if (str1.length() != str2.length()) { return false; } char[] arr1 = str1.toLowerCase().toCharArray(); char[] arr2 = str2.toLowerCase().toCharArray(); Arrays.sort(arr1); Arrays.sort(arr2); return Arrays.equals(arr1, arr2); }
Implement a function that takes a list of integers as input and returns the maximum difference between any two elements in the list.	```java public int findMaxDifference(List<Integer> numbers) { if (numbers.isEmpty() || numbers.size() == 1) { return 0; } int min = numbers.get(0); int maxDiff = numbers.get(1) - min; for (int i = 1; i < numbers.size(); i++) { if (numbers.get(i) - min > maxDiff) { maxDiff = numbers.get(i) - min; } if (numbers.get(i) < min) { min = numbers.get(i); } } return maxDiff; }
Write a Java function that takes a string as input and returns true if the string is a palindrome, false otherwise.	```java public boolean isPalindrome(String str) { int start = 0; int end = str.length() - 1; while (start < end) { if (str.charAt(start) != str.charAt(end)) { return false; } start++; end--; } return true; }
Create a function that removes all duplicate elements from a list.	```java import java.util.*; public class Main { public static List<Integer> removeDuplicates(List<Integer> list) { Set<Integer> set = new HashSet<>(list); return new ArrayList<>(set); } public static void main(String[] args) { List<Integer> list = Arrays.asList(1, 2, 2, 3, 4, 4, 5, 6, 6); List<Integer> newList = removeDuplicates(list); System.out.println(newList); } }
Design a function to count the number of occurrences of a specific string in a list of strings.	```java public class Main { public static int countOccurrences(List<String> list, String target) { int count = 0; for (String str : list) { if (str.equals(target)) { count++; } } return count; } public static void main(String[] args) { List<String> list = Arrays.asList("apple", "banana", "apple", "orange", "apple"); String target = "apple"; int occurrences = countOccurrences(list, target); System…
Write a function that takes a list of integers and returns the second largest number in the list.	```java public class Main { public static int secondLargest(List<Integer> list) { if (list.size() < 2) { return -1; // Return -1 if the list has less than 2 elements } Collections.sort(list); return list.get(list.size() - 2); // Return the second last element } public static void main(String[] args) { List<Integer> list = Arrays.asList(12, 45, 7, 23, 56, 89, 34); int secondLargestNum = secondLarg…
Create a function that takes a string and returns true if the string is a palindrome, false otherwise.	```java public class Main { public static boolean isPalindrome(String str) { String reversed = new StringBuilder(str).reverse().toString(); return str.equals(reversed); } public static void main(String[] args) { String str = "madam"; boolean isPal = isPalindrome(str); System.out.println("Is '" + str + "' a palindrome? " + isPal); } }
Design a function to convert a given temperature from Celsius to Fahrenheit.	```java public class Main { public static double celsiusToFahrenheit(double celsius) { return (celsius * 9 / 5) + 32; } public static void main(String[] args) { double celsius = 30.0; double fahrenheit = celsiusToFahrenheit(celsius); System.out.println(celsius + "°C is " + fahrenheit + "°F"); } }
Develop a Java function that takes an integer as input and returns the sum of all digits in the integer.	public int sumOfDigits(int num) { int sum = 0; while (num != 0) { sum = sum + num % 10; num = num / 10; } return sum; }
Write a function that takes a list of integers as input and returns the second largest number in the list.	public int secondLargestNumber(int[] array) { int max = Integer.MIN_VALUE; int secondMax = Integer.MIN_VALUE; for (int i = 0; i < array.length; i++) { if (array[i] > max) { secondMax = max; max = array[i]; } else if (array[i] > secondMax && array[i] != max) { secondMax = array[i]; } } return secondMax; }
Develop a Java function that takes two strings as input and returns true if they are anagrams of each other, and false otherwise.	public boolean areAnagrams(String str1, String str2) { if (str1.length() != str2.length()) { return false; } char[] charArray1 = str1.toCharArray(); char[] charArray2 = str2.toCharArray(); Arrays.sort(charArray1); Arrays.sort(charArray2); return Arrays.equals(charArray1, charArray2); }
Write a function that takes a list of integers as input and returns the frequency of each number in the list.	public Map<Integer, Integer> frequencyOfNumbers(int[] array) { Map<Integer, Integer> frequencyMap = new HashMap<>(); for (int i = 0; i < array.length; i++) { if (frequencyMap.containsKey(array[i])) { frequencyMap.put(array[i], frequencyMap.get(array[i]) + 1); } else { frequencyMap.put(array[i], 1); } } return frequencyMap; }
Develop a Java function that takes an integer as input and returns the number of bits set to 1 in the binary representation of the integer.	public int countBits(int num) { int count = 0; while (num != 0) { count += num & 1; num >>= 1; } return count; }
Write a Java function to remove duplicates from a given list of strings and return the new list with unique elements.	```java import java.util.ArrayList; import java.util.LinkedHashSet; import java.util.List; import java.util.Set; public class Main { public static List<String> removeDuplicates(List<String> list) { Set<String> set = new LinkedHashSet<>(list); return new ArrayList<>(set); } public static void main(String[] args) { List<String> list = new ArrayList<>(); list.add("apple"); list.add("banana"); list.a…
Write a Java function that takes a list of strings as input and returns True if all strings in the list are non-empty, False otherwise.	```java import java.util.List; public class Main { public static boolean allNonEmpty(List<String> list) { for (String str : list) { if (str.isEmpty()) { return false; } } return true; } public static void main(String[] args) { List<String> list = new ArrayList<>(); list.add("hello"); list.add("world"); list.add("abc"); System.out.println(allNonEmpty(list)); list.add(""); System.out.println(allNon…
Write a Java function to concatenate all strings in a given list into a single string.	```java import java.util.List; public class Main { public static String concatenateStrings(List<String> list) { StringBuilder sb = new StringBuilder(); for (String str : list) { sb.append(str); } return sb.toString(); } public static void main(String[] args) { List<String> list = new ArrayList<>(); list.add("hello"); list.add("world"); list.add("abc"); System.out.println(concatenateStrings(list))…
Write a Java function to find the longest string in a given list of strings.	```java import java.util.List; public class Main { public static String longestString(List<String> list) { String longest = ""; for (String str : list) { if (str.length() > longest.length()) { longest = str; } } return longest; } public static void main(String[] args) { List<String> list = new ArrayList<>(); list.add("hello"); list.add("world"); list.add("abcdefg"); System.out.println(longestStri…
Write a Java function to count the frequency of each character in a given string.	```java import java.util.HashMap; import java.util.Map; public class Main { public static Map<Character, Integer> charFrequency(String str) { Map<Character, Integer> map = new HashMap<>(); for (char c : str.toCharArray()) { map.put(c, map.getOrDefault(c, 0) + 1); } return map; } public static void main(String[] args) { System.out.println(charFrequency("hello world")); } }
Write a Java function to find the maximum element in a given array of integers.	```java public class Main { public static int findMaxElement(int[] arr) { int maxElement = arr[0]; for (int i = 1; i < arr.length; i++) { if (arr[i] > maxElement) { maxElement = arr[i]; } } return maxElement; } public static void main(String[] args) { int[] arr = {4, 2, 7, 1, 9}; System.out.println("Maximum element: " + findMaxElement(arr)); } }
Implement a Java function named containsAll that takes two lists of integers as input and returns True if the first list contains all elements of the second list, False otherwise.	```java import java.util.List; import java.util.ArrayList; public class Main { public static boolean containsAll(List<Integer> list1, List<Integer> list2) { for (Integer element : list2) { if (!list1.contains(element)) { return false; } } return true; } public static void main(String[] args) { List<Integer> list1 = new ArrayList<>(List.of(1, 2, 3, 4, 5)); List<Integer> list2 = new ArrayList<>(Lis…
Write a Java function to find the count of all duplicate elements in a given list of integers.	```java import java.util.List; import java.util.HashMap; import java.util.Map; public class Main { public static int countDuplicates(List<Integer> list) { Map<Integer, Integer> countMap = new HashMap<>(); for (Integer element : list) { countMap.put(element, countMap.getOrDefault(element, 0) + 1); } int duplicateCount = 0; for (Map.Entry<Integer, Integer> entry : countMap.entrySet()) { if (entry.g…
Implement a Java function to find the longest common prefix in a list of strings.	```java import java.util.List; public class Main { public static String findLongestCommonPrefix(List<String> list) { if (list.isEmpty()) { return ""; } String prefix = list.get(0); for (String str : list) { while (!str.startsWith(prefix)) { prefix = prefix.substring(0, prefix.length() - 1); if (prefix.isEmpty()) { return ""; } } } return prefix; } public static void main(String[] args) { List<Str…
Write a Java function to reverse the elements of a given list of integers.	```java import java.util.List; import java.util.Collections; public class Main { public static List<Integer> reverseList(List<Integer> list) { Collections.reverse(list); return list; } public static void main(String[] args) { List<Integer> list = List.of(1, 2, 3, 4, 5); System.out.println("Reversed list: " + reverseList(list)); } }
Write a function that takes a list of integers and returns the nth largest element from the list, where n is a user input.	```java import java.util.Arrays; import java.util.Scanner; public class Main { public static int nthLargest(int[] list, int n) { Arrays.sort(list); return list[list.length - n]; } public static void main(String[] args) { Scanner scanner = new Scanner(System.in); System.out.println("Enter the list of integers separated by space:"); String[] input = scanner.nextLine().split(" "); int[] list = new i…
Create a function that calculates the sum of the squares of the first n natural numbers, where n is a user input.	```java import java.util.Scanner; public class Main { public static int sumOfSquares(int n) { int sum = 0; for (int i = 1; i <= n; i++) { sum += i * i; } return sum; } public static void main(String[] args) { Scanner scanner = new Scanner(System.in); System.out.println("Enter the value of n:"); int n = scanner.nextInt(); System.out.println("The sum of the squares of the first " + n + " natural nu…
Implement a function that takes in a string and returns the number of vowels in the string.	```java import java.util.Scanner; public class Main { public static int countVowels(String str) { int count = 0; for (int i = 0; i < str.length(); i++) { char c = str.charAt(i); if (c == 'a' || c == 'e' || c == 'i' || c == 'o' || c == 'u' || c == 'A' || c == 'E' || c == 'I' || c == 'O' || c == 'U') { count++; } } return count; } public static void main(String[] args) { Scanner scanner = new Scann…
Write a function that takes in a string and returns the string with all the characters in reverse order.	```java import java.util.Scanner; public class Main { public static String reverseString(String str) { String reversed = ""; for (int i = str.length() - 1; i >= 0; i--) { reversed += str.charAt(i); } return reversed; } public static void main(String[] args) { Scanner scanner = new Scanner(System.in); System.out.println("Enter a string:"); String str = scanner.next(); System.out.println("The rever…
Create a function that calculates the factorial of a given number.	```java import java.util.Scanner; public class Main { public static int factorial(int n) { int fact = 1; for (int i = 1; i <= n; i++) { fact *= i; } return fact; } public static void main(String[] args) { Scanner scanner = new Scanner(System.in); System.out.println("Enter a number:"); int n = scanner.nextInt(); System.out.println("The factorial of " + n + " is: " + factorial(n)); } }
Develop a Java function to find the longest word in a given list of strings.	public String findLongestWord(String[] words) { String longestWord = ""; for (String word : words) { if (word.length() > longestWord.length()) { longestWord = word; } } return longestWord; }
Write a Java function to count the occurrences of all vowels in a given string.	public int countVowels(String str) { int vowelCount = 0; String vowels = "aeiouAEIOU"; for (char c : str.toCharArray()) { if (vowels.indexOf(c) != -1) { vowelCount++; } } return vowelCount; }
Develop a Java function to reverse the order of elements in a given list of integers.	public List<Integer> reverseList(List<Integer> list) { List<Integer> reversedList = new ArrayList<>(); for (int i = list.size() - 1; i >= 0; i--) { reversedList.add(list.get(i)); } return reversedList; }
Write a Java function to find the maximum difference between any two elements in a list of integers.	public int findMaxDifference(List<Integer> list) { int maxDiff = 0; int min = list.get(0); int max = list.get(0); for (int i = 1; i < list.size(); i++) { if (list.get(i) < min) { min = list.get(i); } if (list.get(i) > max) { max = list.get(i); } } maxDiff = max - min; return maxDiff; }
Develop a Java function to check if a given list of integers is in ascending order.	public boolean isAscending(List<Integer> list) { for (int i = 0; i < list.size() - 1; i++) { if (list.get(i) > list.get(i + 1)) { return false; } } return true; }
Write a function `contains_duplicates` that takes a list of integers as an input and returns true if the list contains any duplicate element, otherwise returns false.	```java public boolean containsDuplicates(List<Integer> list) { Set<Integer> set = new HashSet<>(list); return set.size() != list.size(); }
Write a function `filter_even_numbers` that takes a list of integers as an input and returns a new list containing only the even numbers from the original list.	```java public List<Integer> filterEvenNumbers(List<Integer> list) { List<Integer> evenNumbers = new ArrayList<>(); for (int num : list) { if (num % 2 == 0) { evenNumbers.add(num); } } return evenNumbers; }
Write a function `sum_of_digits` that takes an integer as an input and returns the sum of its digits.	```java public int sumOfDigits(int num) { int sum = 0; while (num != 0) { sum += num % 10; num /= 10; } return sum; }
Write a function `merge_lists` that takes two lists of integers as inputs and returns a new list containing all elements from both lists, without duplicates.	```java public List<Integer> mergeLists(List<Integer> list1, List<Integer> list2) { Set<Integer> set = new HashSet<>(list1); set.addAll(list2); return new ArrayList<>(set); }
Write a function `find_max_value` that takes a list of integers as an input and returns the maximum value in the list.	```java public int findMaxValue(List<Integer> list) { return Collections.max(list); }
Write a Java function to find the maximum sum of a contiguous subarray within a one-dimensional array of numbers.	```java public static int maxSubArray(int[] nums) { int maxSum = nums[0]; int currentSum = nums[0]; for (int i = 1; i < nums.length; i++) { currentSum = Math.max(nums[i], currentSum + nums[i]); maxSum = Math.max(maxSum, currentSum); } return maxSum; }
Write a Java function to check if a given string is an anagram of another string.	```java public static boolean isAnagram(String s1, String s2) { if (s1.length() != s2.length()) { return false; } char[] s1Array = s1.toLowerCase().toCharArray(); char[] s2Array = s2.toLowerCase().toCharArray(); Arrays.sort(s1Array); Arrays.sort(s2Array); return Arrays.equals(s1Array, s2Array); }
Write a Java function to find the first non-repeating character in a given string.	```java public static char firstNonRepeatingChar(String s) { HashMap<Character, Integer> charCount = new HashMap<>(); for (char c : s.toCharArray()) { charCount.put(c, charCount.getOrDefault(c, 0) + 1); } for (char c : s.toCharArray()) { if (charCount.get(c) == 1) { return c; } } return '\0'; }
Write a Java function to reverse the order of words in a given sentence.	```java public static String reverseSentence(String sentence) { String[] words = sentence.split(" "); StringBuilder reversedSentence = new StringBuilder(); for (int i = words.length - 1; i >= 0; i--) { reversedSentence.append(words[i]).append(" "); } return reversedSentence.toString().trim(); }
Write a Java function to find the longest common prefix among an array of strings.	```java public static String longestCommonPrefix(String[] strs) { if (strs.length == 0) { return ""; } String prefix = strs[0]; for (int i = 1; i < strs.length; i++) { while (strs[i].indexOf(prefix) != 0) { prefix = prefix.substring(0, prefix.length() - 1); } } return prefix; }
Create a Java function that takes an array of integers as input and returns the sum of all even numbers in the array.	```java public int sumOfEvenNumbers(int[] arr) { int sum = 0; for (int num : arr) { if (num % 2 == 0) { sum += num; } } return sum; }
Write a Java function that takes a string as input and returns the string with all vowels removed.	```java public String removeVowels(String str) { StringBuilder strBuilder = new StringBuilder(); for (char c : str.toCharArray()) { if (c != 'a' && c != 'e' && c != 'i' && c != 'o' && c != 'u' && c != 'A' && c != 'E' && c != 'I' && c != 'O' && c != 'U') { strBuilder.append(c); } } return strBuilder.toString(); }
Create a Java function that takes a 2D array of integers as input and returns the sum of all numbers in the 2D array.	```java public int sumOf2DArray(int[][] arr) { int sum = 0; for (int[] row : arr) { for (int num : row) { sum += num; } } return sum; }
Write a Java function that takes a string as input and returns the reverse of the string.	```java public String reverseString(String str) { StringBuilder strBuilder = new StringBuilder(str); return strBuilder.reverse().toString(); }
Create a Java function that takes an array of integers as input and returns true if all numbers in the array are unique, and false otherwise.	```java import java.util.HashSet; public boolean areNumbersUnique(int[] arr) { HashSet<Integer> set = new HashSet<>(); for (int num : arr) { if (!set.add(num)) { return false; } } return true; }
Given a string, write a function that returns the string with all spaces removed.	public static String removeSpaces(String str) { return str.replace(" ", ""); }
Write a function that determines whether a given integer is even or not.	public static boolean isEven(int num) { return num % 2 == 0; }
Write a function that takes a string as input and returns the string in uppercase.	public static String toUpperCase(String str) { return str.toUpperCase(); }
Given an array of integers, write a function that returns the highest value in the array.	public static int findMaxValue(int[] arr) { int maxValue = arr[0]; for (int i = 1; i < arr.length; i++) { if (arr[i] > maxValue) { maxValue = arr[i]; } } return maxValue; }
Write a function that takes two integers as input and returns their greatest common divisor (GCD).	public static int gcd(int a, int b) { if (b == 0) { return a; } else { return gcd(b, a % b); } }
Write a function to count the occurrences of each digit in a given integer. The function should return a dictionary with the digits as the keys and their counts as the values.	```java public static HashMap<Integer, Integer> countDigits(int n) { HashMap<Integer, Integer> digitCounts = new HashMap<>(); while (n > 0) { int digit = n % 10; n /= 10; if (digitCounts.containsKey(digit)) { digitCounts.put(digit, digitCounts.get(digit) + 1); } else { digitCounts.put(digit, 1); } } return digitCounts; }
Write a function that takes a list of strings as input and returns the longest string in the list.	```java public static String longestString(List<String> strings) { String longest = ""; for (String str : strings) { if (str.length() > longest.length()) { longest = str; } } return longest; }
Write a function that takes a list of integers as input and returns a new list containing only the even numbers from the original list.	```java public static List<Integer> getEvenNumbers(List<Integer> numbers) { List<Integer> evenNumbers = new ArrayList<>(); for (int num : numbers) { if (num % 2 == 0) { evenNumbers.add(num); } } return evenNumbers; }
Write a function that takes a string as input and returns the number of vowels in the string.	```java public static int countVowels(String str) { int vowelCount = 0; for (char c : str.toCharArray()) { if (c == 'a' || c == 'e' || c == 'i' || c == 'o' || c == 'u') { vowelCount++; } } return vowelCount; }
Write a function that takes a list of integers as input and returns the number of unique elements in the list.	```java public static int countUniqueElements(List<Integer> numbers) { HashSet<Integer> uniqueNumbers = new HashSet<>(numbers); return uniqueNumbers.size(); }
Write a function that takes a string as input and returns the string in uppercase, removing all the vowels.	```java public String removeVowelsAndUppercase(String str) { String vowels = "aeiouAEIOU"; StringBuilder result = new StringBuilder(); for (char c : str.toCharArray()) { if (!vowels.contains(String.valueOf(c))) { result.append(Character.toUpperCase(c)); } } return result.toString(); }
You are given a list of strings and you need to write a function that returns the longest string in the list.	```java public String findLongestString(List<String> list) { String longest = ""; for (String str : list) { if (str.length() > longest.length()) { longest = str; } } return longest; }
Write a function that takes an integer as input and returns the sum of its digits.	```java public int sumOfDigits(int num) { int sum = 0; while (num != 0) { sum += num % 10; num /= 10; } return sum; }
Create a function that takes a list of integers as input and returns a boolean indicating whether the list contains at least one even number.	```java public boolean hasEvenNumber(List<Integer> list) { for (Integer num : list) { if (num % 2 == 0) { return true; } } return false; }
You are given a list of strings and you need to write a function that returns a new list containing the strings in reverse order.	```java public List<String> reverseList(List<String> list) { List<String> result = new ArrayList<>(); for (int i = list.size() - 1; i >= 0; i--) { result.add(list.get(i)); } return result; }
Create a function that takes in a string and checks if the string is in uppercase. The function should return True if the string is in uppercase, and False otherwise.	public boolean checkUppercase(String str) { for(int i = 0; i < str.length(); i++){ if(!Character.isUpperCase(str.charAt(i))){ return false; } } return true; }
Write a Java function that takes a string as input and returns the first non-repeating character in the string. If there are multiple non-repeating characters, it should return the first one it encounters.	public char firstNonRepeatingCharacter(String str) { HashMap<Character, Integer> charCountMap = new HashMap<>(); for(char c : str.toCharArray()){ if(charCountMap.containsKey(c)){ charCountMap.put(c, charCountMap.get(c) + 1); } else { charCountMap.put(c, 1); } } for(char c : str.toCharArray()){ if(charCountMap.get(c) == 1){ return c; } } return ' '; }
Create a function that takes in a list of integers and checks if the list contains any duplicate values. The function should return True if the list contains duplicates, and False otherwise.	public boolean hasDuplicates(List<Integer> list) { Set<Integer> set = new HashSet<>(list); return set.size() != list.size(); }
Write a Java function that takes a string as input and returns the string with all vowels removed.	public String removeVowels(String str) { StringBuilder StringBuilder = new StringBuilder(); for(char c : str.toLowerCase().toCharArray()){ if(c != 'a' && c != 'e' && c != 'i' && c != 'o' && c != 'u'){ StringBuilder.append(c); } } return StringBuilder.toString(); }
Create a function that takes in a list of strings and returns the longest string in the list.	public String longestString(List<String> list) { String longest = list.get(0); for(String str : list){ if(str.length() > longest.length()){ longest = str; } } return longest; }
Design a Java function to count the frequency of a given character in a string.	```java public int charFrequency(String str, char c) { int count = 0; for (int i = 0; i < str.length(); i++) { if (str.charAt(i) == c) { count++; } } return count; }
Write a Java class to represent a rectangle. The class should have attributes for the length and width, and methods to calculate the area and perimeter.	```java public class Rectangle { private int length; private int width; public Rectangle(int length, int width) { this.length = length; this.width = width; } public int calculateArea() { return length * width; } public int calculatePerimeter() { return 2 * (length + width); } }
Create a Java function that takes a string as input and returns true if the string is a palindrome, false otherwise.	```java public boolean isPalindrome(String str) { String reversed = new StringBuilder(str).reverse().toString(); return str.equals(reversed); }
Design a Java function to find the second largest number in an array of integers.	```java public int findSecondLargest(int[] arr) { int max = Integer.MIN_VALUE; int secondMax = Integer.MIN_VALUE; for (int i = 0; i < arr.length; i++) { if (arr[i] > max) { secondMax = max; max = arr[i]; } else if (arr[i] > secondMax && arr[i] != max) { secondMax = arr[i]; } } return secondMax; }
Write a function that takes a list of integers as input and returns the sum of the squares of each integer.	public int sumOfSquares(List<Integer> list) { int sum = 0; for (int num : list) { sum += num * num; } return sum; }
Design a function that takes a string as input and returns the string in reverse order.	public String reverseString(String str) { StringBuilder reversed = new StringBuilder(str); return reversed.reverse().toString(); }
Create a program that takes a list of integers as input and returns the count of even numbers in the list.	public int countEvenNumbers(List<Integer> list) { int count = 0; for (int num : list) { if (num % 2 == 0) { count++; } } return count; }
Write a function that takes a string as input and returns True if the string is a palindrome, and False otherwise.	public boolean isPalindrome(String str) { String reversed = new StringBuilder(str).reverse().toString(); return str.equals(reversed); }
Design a function that takes a list of strings as input and returns the longest string in the list.	public String longestString(List<String> list) { String longest = ""; for (String str : list) { if (str.length() > longest.length()) { longest = str; } } return longest; }
Write a Java function that takes a list of integers as input and returns a new list that contains all the squares of the numbers from the original list.	```java import java.util.ArrayList; import java.util.List; public class Main { public static List<Integer> squareNumbers(List<Integer> numbers) { List<Integer> squaredNumbers = new ArrayList<>(); for (int number : numbers) { squaredNumbers.add(number * number); } return squaredNumbers; } }
Create a Java function to find the average value in a list of integers.	```java import java.util.List; public class Main { public static double averageValue(List<Integer> numbers) { int sum = 0; for (int number : numbers) { sum += number; } return (double) sum / numbers.size(); } }
Write a Java function that takes a list of strings as input and returns a new list that contains all the strings from the original list, but in uppercase.	```java import java.util.ArrayList; import java.util.List; public class Main { public static List<String> upperCaseStrings(List<String> strings) { List<String> upperCaseStrings = new ArrayList<>(); for (String str : strings) { upperCaseStrings.add(str.toUpperCase()); } return upperCaseStrings; } }
You are given a list of integers and you need to write a Java function that returns the count of numbers that are greater than the average of the list.	```java import java.util.List; public class Main { public static int countAboveAverage(List<Integer> numbers) { int sum = 0; for (int number : numbers) { sum += number; } double average = (double) sum / numbers.size(); int count = 0; for (int number : numbers) { if (number > average) { count++; } } return count; } }
Implement a Java function that takes a list of strings as input and returns the longest string in the list.	```java import java.util.List; public class Main { public static String findLongestString(List<String> strings) { String longestString = ""; for (String str : strings) { if (str.length() > longestString.length()) { longestString = str; } } return longestString; } }
Write a Java function that takes a list of strings as input and returns a new list that contains only the strings that have a length of more than 5 characters.	public static List<String> filterLongStrings(List<String> strings) { List<String> filteredStrings = new ArrayList<>(); for (String string : strings) { if (string.length() > 5) { filteredStrings.add(string); } } return filteredStrings; }
Create a Java function that takes a list of integers as input and returns the count of all prime numbers in the list.	public static int countPrimeNumbers(List<Integer> numbers) { int count = 0; for (Integer number : numbers) { if (isPrime(number)) { count++; } } return count; } public static boolean isPrime(int number) { if (number <= 1) { return false; } for (int i = 2; i <= Math.sqrt(number); i++) { if (number % i == 0) { return false; } } return true; }
Write a Java function that takes a list of strings as input and returns a new string that is the concatenation of all the strings in the list, separated by a space.	public static String concatenateStrings(List<String> strings) { StringBuilder result = new StringBuilder(); for (String string : strings) { result.append(string).append(" "); } return result.toString().trim(); }
Create a Java function that takes a list of integers as input and returns the count of all numbers that are greater than the average of the list.	public static int countNumbersGreaterThanAverage(List<Integer> numbers) { int sum = 0; for (Integer number : numbers) { sum += number; } double average = (double) sum / numbers.size(); int count = 0; for (Integer number : numbers) { if (number > average) { count++; } } return count; }
Write a Java function that takes a list of integers as input and returns a new list that contains only the elements that appear more than once in the list.	public static List<Integer> filterDuplicateElements(List<Integer> numbers) { Map<Integer, Integer> frequencyMap = new HashMap<>(); for (Integer number : numbers) { frequencyMap.put(number, frequencyMap.getOrDefault(number, 0) + 1); } List<Integer> duplicateElements = new ArrayList<>(); for (Map.Entry<Integer, Integer> entry : frequencyMap.entrySet()) { if (entry.getValue() > 1) { duplicateElement…
Write a function that takes a string as input and returns true if it contains the substring "java" (case sensitive).	public boolean containsJavaSubstring(String input) { return input.contains("java"); }
Write a function that takes an integer as input and returns a string representation of the integer in hexadecimal format.	public String toHexadecimal(int num) { return Integer.toHexString(num); }
Write a function that takes a list of strings as input and returns the longest string in the list.	public String findLongestString(List<String> strings) { if (strings.isEmpty()) { return ""; } String longest = strings.get(0); for (String s : strings) { if (s.length() > longest.length()) { longest = s; } } return longest; }
Write a function that takes a string as input and returns the string in uppercase.	public String toUpperCase(String input) { return input.toUpperCase(); }
Write a function that takes an integer as input and returns the sum of its digits.	public int sumOfDigits(int num) { int sum = 0; while (num != 0) { sum += num % 10; num /= 10; } return sum; }
Write a function to find the average of all numbers in a list.	public class Main { public static double findAverage(List<Double> numbers) { double sum = 0; for (double number : numbers) { sum += number; } return sum / numbers.size(); } public static void main(String[] args) { List<Double> numbers = Arrays.asList(1.0, 2.0, 3.0, 4.0, 5.0); double average = findAverage(numbers); System.out.println("Average: " + average); } }
Write a function to count the number of strings in a list that have more than 5 characters.	public class Main { public static int countLongStrings(List<String> strings) { int count = 0; for (String str : strings) { if (str.length() > 5) { count++; } } return count; } public static void main(String[] args) { List<String> strings = Arrays.asList("apple", "banana", "cherry", "date", "elderberry"); int count = countLongStrings(strings); System.out.println("Number of long strings: " + count)…
Create a function that takes a list of integers as input and returns a new list containing only the numbers that are greater than 10.	public class Main { public static List<Integer> filterNumbers(List<Integer> numbers) { List<Integer> result = new ArrayList<>(); for (int number : numbers) { if (number > 10) { result.add(number); } } return result; } public static void main(String[] args) { List<Integer> numbers = Arrays.asList(1, 5, 12, 15, 20, 25); List<Integer> result = filterNumbers(numbers); System.out.println("Numbers grea…
Write a function that takes two lists of integers as input and returns true if they contain the same elements, regardless of order.	public class Main { public static boolean areListsEqual(List<Integer> list1, List<Integer> list2) { if (list1.size() != list2.size()) { return false; } Collections.sort(list1); Collections.sort(list2); return list1.equals(list2); } public static void main(String[] args) { List<Integer> list1 = Arrays.asList(1, 2, 3, 4, 5); List<Integer> list2 = Arrays.asList(5, 4, 3, 2, 1); boolean areEqual = are…
Design a function to convert a list of strings to uppercase and return the resulting list.	public class Main { public static List<String> stringsToUppercase(List<String> strings) { List<String> result = new ArrayList<>(); for (String str : strings) { result.add(str.toUpperCase()); } return result; } public static void main(String[] args) { List<String> strings = Arrays.asList("apple", "banana", "cherry"); List<String> result = stringsToUppercase(strings); System.out.println("Uppercase …
Write a function to check if a given string is a palindrome or not.	```java public class Main { public static boolean isPalindrome(String s) { String reversed = new StringBuilder(s).reverse().toString(); return s.equals(reversed); } }
Given a list of integers, write a function to find the maximum difference between any two elements where the larger element appears after the smaller element in the list.	```java public class Main { public static int maxDifference(int[] arr) { int maxDiff = arr[1] - arr[0]; int minElement = arr[0]; for (int i = 1; i < arr.length; i++) { if (arr[i] - minElement > maxDiff) { maxDiff = arr[i] - minElement; } if (arr[i] < minElement) { minElement = arr[i]; } } return maxDiff; } }
Write a function to return the second largest element in a list of integers.	```java public class Main { public static int secondLargestElement(int[] arr) { int max = Integer.MIN_VALUE; int secondMax = Integer.MIN_VALUE; for (int i : arr) { if (i > max) { secondMax = max; max = i; } else if (i > secondMax && i != max) { secondMax = i; } } return secondMax; } }
Write a function to find the number of pairs of integers in a list that have a difference of exactly 1.	```java public class Main { public static int countPairsWithDifferenceOne(int[] arr) { int count = 0; for (int i = 0; i < arr.length; i++) { for (int j = i + 1; j < arr.length; j++) { if (Math.abs(arr[i] - arr[j]) == 1) { count++; } } } return count; } }
Given a list of characters, write a function to find the first non-repeating character in the list.	```java public class Main { public static char firstNonRepeatingCharacter(char[] chars) { int[] count = new int[256]; for (char c : chars) { count[c]++; } for (char c : chars) { if (count[c] == 1) { return c; } } return '\0'; } }
Write a Java function that takes two integers as input and returns their greatest common divisor (GCD).	public class Main { public static int getGCD(int num1, int num2) { if (num2 == 0) { return num1; } else { return getGCD(num2, num1 % num2); } } public static void main(String[] args) { System.out.println(getGCD(12, 15)); } }
Create a Java function that takes a string as input and returns the string reversed.	public class Main { public static String reverseString(String str) { String reversed = ""; for (int i = str.length() - 1; i >= 0; i--) { reversed += str.charAt(i); } return reversed; } public static void main(String[] args) { System.out.println(reverseString("Hello World")); } }
Write a Java function that takes a list of integers as input and returns the second largest number in the list.	import java.util.*; public class Main { public static int getSecondLargest(List<Integer> list) { Set<Integer> set = new HashSet<>(list); List<Integer> uniqueList = new ArrayList<>(set); Collections.sort(uniqueList, Collections.reverseOrder()); if (uniqueList.size() < 2) { return -1; // Return -1 if there is no second largest number } else { return uniqueList.get(1); } } public static void main(St…
Create a Java function that takes a string as input and returns true if the string is a palindrome, false otherwise.	public class Main { public static boolean isPalindrome(String str) { String reversed = ""; for (int i = str.length() - 1; i >= 0; i--) { reversed += str.charAt(i); } return str.equals(reversed); } public static void main(String[] args) { System.out.println(isPalindrome("madam")); } }
Write a Java function that takes a list of strings as input and returns the longest string in the list.	public class Main { public static String getLongestString(List<String> list) { String longest = ""; for (String str : list) { if (str.length() > longest.length()) { longest = str; } } return longest; } public static void main(String[] args) { List<String> list = Arrays.asList("apple", "banana", "orange"); System.out.println(getLongestString(list)); } }
Given a list of strings, write a function that returns the count of strings that start with a vowel.	```java public int countVowelStrings(String[] strings) { int count = 0; for (String str : strings) { String firstLetter = str.substring(0, 1).toLowerCase(); if (firstLetter.equals("a") || firstLetter.equals("e") || firstLetter.equals("i") || firstLetter.equals("o") || firstLetter.equals("u")) { count++; } } return count; }
You are given a list of integers and a target sum. Write a function that returns True if there exists a pair of integers in the list that adds up to the target sum, and False otherwise.	```java public boolean hasPairSum(int[] nums, int targetSum) { Set<Integer> set = new HashSet<>(); for (int num : nums) { if (set.contains(targetSum - num)) { return true; } set.add(num); } return false; }
Given a dictionary where the keys are names of cities and the values are their corresponding populations, write a function that returns the name of the city with the highest population.	```java public String findMostPopulatedCity(Map<String, Integer> cityPopulations) { String mostPopulatedCity = null; int maxPopulation = 0; for (Map.Entry<String, Integer> entry : cityPopulations.entrySet()) { if (entry.getValue() > maxPopulation) { maxPopulation = entry.getValue(); mostPopulatedCity = entry.getKey(); } } return mostPopulatedCity; }
Write a function that takes a string as an input and returns the string with all the vowels removed.	```java public String removeVowels(String str) { return str.replaceAll("[aeiouAEIOU]", ""); }
You are given a list of integers, write a function that returns the number of unique elements in the list.	```java public int countUniqueElements(int[] nums) { Set<Integer> set = new HashSet<>(); for (int num : nums) { set.add(num); } return set.size(); }
Write a Java method to count the total number of words in a given string.	public int countWords(String str) { if (str == null || str.isEmpty()) return 0; String[] words = str.split("\\s+"); return words.length; }
Create a Java program to calculate the total number of uppercase letters in a given string.	public int countUppercaseLetters(String str) { int count = 0; for (int i = 0; i < str.length(); i++) { if (Character.isUpperCase(str.charAt(i))) count++; } return count; }
Write a Java method to reverse a given string.	public String reverseString(String str) { String reversed = ""; for (int i = str.length() - 1; i >= 0; i--) { reversed += str.charAt(i); } return reversed; }
Create a Java program to count the frequency of each character in a given string.	public Map<Character, Integer> countCharFrequency(String str) { Map<Character, Integer> charFrequency = new HashMap<>(); for (int i = 0; i < str.length(); i++) { char c = str.charAt(i); charFrequency.put(c, charFrequency.getOrDefault(c, 0) + 1); } return charFrequency; }
Write a Java method to remove all leading and trailing whitespaces from a given string.	public String trimString(String str) { return str.trim(); }
Write a function to find the highest number in a list of integers.	public static int findHighestNumber(int[] list) { int highestNumber = list[0]; for (int i = 1; i < list.length; i++) { if (list[i] > highestNumber) { highestNumber = list[i]; } } return highestNumber; }
Write a function that takes a list of integers as input and returns the count of all the numbers greater than or equal to their index.	public static int countNumbersGreaterThanOrEqualToIndex(int[] list) { int count = 0; for (int i = 0; i < list.length; i++) { if (list[i] >= i) { count++; } } return count; }
Implement a function that takes a string as input and returns the frequency of each character in the string.	public static HashMap<Character, Integer> getCharacterFrequency(String str) { HashMap<Character, Integer> map = new HashMap<>(); for (int i = 0; i < str.length(); i++) { char c = str.charAt(i); if (map.containsKey(c)) { map.put(c, map.get(c) + 1); } else { map.put(c, 1); } } return map; }
Write a function that takes two lists of integers as input and returns the total sum of common elements.	public static int sumOfCommonElements(int[] list1, int[] list2) { HashSet<Integer> set1 = new HashSet<>(); for (int num : list1) { set1.add(num); } int sum = 0; for (int num : list2) { if (set1.contains(num)) { sum += num; } } return sum; }
Implement a function that takes a list of strings as input and returns the longest string in the list.	public static String getLongestString(String[] list) { String longestString = list[0]; for (int i = 1; i < list.length; i++) { if (list[i].length() > longestString.length()) { longestString = list[i]; } } return longestString; }
Write a function that takes a list of integers as input and returns the count of prime numbers in the list.	public static int countPrimeNumbers(int[] list) { int count = 0; for (int num : list) { boolean isPrime = true; if (num <= 1) { isPrime = false; } else { for (int i = 2; i * i <= num; i++) { if (num % i == 0) { isPrime = false; break; } } } if (isPrime) { count++; } } return count; }
Design a Java function that takes a string as input and returns the string with all vowels removed.	```java public String removeVowels(String str) { String result = ""; for (int i = 0; i < str.length(); i++) { char ch = str.charAt(i); if (!isVowel(ch)) { result += ch; } } return result; } public boolean isVowel(char ch) { ch = Character.toLowerCase(ch); return ch == 'a' || ch == 'e' || ch == 'i' || ch == 'o' || ch == 'u'; }
You are given an integer array as input, write a function to find the maximum sum of a contiguous subarray within the array.	```java public int maxSubArraySum(int[] arr) { int maxSoFar = arr[0]; int maxEndingHere = arr[0]; for (int i = 1; i < arr.length; i++) { maxEndingHere = Math.max(arr[i], maxEndingHere + arr[i]); maxSoFar = Math.max(maxSoFar, maxEndingHere); } return maxSoFar; }
Write a Java function that accepts a list of integers as input and returns the second largest number in the list.	```java public int secondLargest(int[] arr) { int max = Integer.MIN_VALUE; int secondMax = Integer.MIN_VALUE; for (int i = 0; i < arr.length; i++) { if (arr[i] > max) { secondMax = max; max = arr[i]; } else if (arr[i] > secondMax && arr[i] != max) { secondMax = arr[i]; } } if (secondMax == Integer.MIN_VALUE) { return -1; // return -1 if there is no second largest number } return secondMax; }
Write a Java function that accepts a string as input and returns true if the string contains at least one digit, otherwise returns false.	```java public boolean containsDigit(String str) { for (int i = 0; i < str.length(); i++) { if (Character.isDigit(str.charAt(i))) { return true; } } return false; }
You are given a 2D integer array as input, write a function to find the row with the maximum sum.	```java public int rowWithMaxSum(int[][] arr) { int maxSumRow = 0; int maxSum = Integer.MIN_VALUE; for (int i = 0; i < arr.length; i++) { int sum = 0; for (int j = 0; j < arr[i].length; j++) { sum += arr[i][j]; } if (sum > maxSum) { maxSum = sum; maxSumRow = i; } } return maxSumRow; }
You are given a list of integers. Write a Java function to find the total count of all even numbers in the list.	public int countEvenNumbers(List<Integer> numbers) { int count = 0; for (int number : numbers) { if (number % 2 == 0) { count++; } } return count; }
Implement a Java function find_smaller(a, b) that takes two integer arguments a and b, and returns the value that is strictly smaller than the other.	public int findSmaller(int a, int b) { if (a < b) { return a; } else { return b; } }
Write a Java function that takes in a list of integers and returns the list sorted in descending order.	import java.util.Collections; import java.util.List; public List<Integer> sortDescending(List<Integer> numbers) { Collections.sort(numbers); Collections.reverse(numbers); return numbers; }
Write a Java function that takes a list of strings as input and returns the list of strings with all vowels removed.	public List<String> removeVowels(List<String> strings) { List<String> result = new ArrayList<>(); for (String str : strings) { String temp = ""; for (char c : str.toCharArray()) { if (!isVowel(c)) { temp += c; } } result.add(temp); } return result; } public boolean isVowel(char c) { c = Character.toLowerCase(c); return c == 'a' || c == 'e' || c == 'i' || c == 'o' || c == 'u'; }
Write a Java function to calculate the average of all the elements in a given list of integers.	public double calculateAverage(List<Integer> numbers) { int sum = 0; for (int number : numbers) { sum += number; } return (double) sum / numbers.size(); }
Write a Java function to calculate the number of seconds in a given minute and second input.	``` public static int calculateSeconds(int minutes, int seconds) { return minutes * 60 + seconds; }
Define a function that takes two strings as input and returns true if the strings are equal, and false otherwise.	``` public static boolean areStringsEqual(String str1, String str2) { return str1.equals(str2); }
Write a function to calculate the number of hours in a given number of days.	``` public static int calculateHours(int days) { return days * 24; }
Write a function that takes a string as input and returns the string with all uppercase letters converted to lowercase.	``` public static String convertToLowerCase(String str) { return str.toLowerCase(); }
Define a function that takes a list of integers as input and returns the count of even numbers in the list.	``` public static int countEvenNumbers(List<Integer> numbers) { int count = 0; for (int number : numbers) { if (number % 2 == 0) { count++; } } return count; }
Write a Java function to find the count of all prime numbers less than or equal to n.	```java public class Main { public static void main(String[] args) { System.out.println(countPrimeNumbers(20)); } public static int countPrimeNumbers(int n) { int count = 0; boolean[] primes = new boolean[n + 1]; for (int i = 0; i <= n; i++) { primes[i] = true; } primes[0] = primes[1] = false; for (int i = 2; i * i <= n; i++) { if (primes[i]) { for (int j = i * i; j <= n; j += i) { primes[j] = fa…
Create a Java function that takes a list of integers as input and returns the sum of all the odd numbers in the list.	```java public class Main { public static void main(String[] args) { int[] numbers = {1, 2, 3, 4, 5, 6, 7, 8, 9, 10}; System.out.println(sumOfOddNumbers(numbers)); } public static int sumOfOddNumbers(int[] numbers) { int sum = 0; for (int number : numbers) { if (number % 2 != 0) { sum += number; } } return sum; } }
Write a Java function that takes a list of strings as input and returns the longest string in the list.	```java public class Main { public static void main(String[] args) { String[] strings = {"apple", "banana", "cherry", "date", "elderberry"}; System.out.println(longestString(strings)); } public static String longestString(String[] strings) { String longest = ""; for (String str : strings) { if (str.length() > longest.length()) { longest = str; } } return longest; } }
Design a Java function to print out the first n Fibonacci numbers, separated by commas.	```java public class Main { public static void main(String[] args) { printFibonacciNumbers(10); } public static void printFibonacciNumbers(int n) { int[] fib = new int[n]; fib[0] = 0; fib[1] = 1; for (int i = 2; i < n; i++) { fib[i] = fib[i - 1] + fib[i - 2]; } for (int i = 0; i < n; i++) { System.out.print(fib[i]); if (i < n - 1) { System.out.print(", "); } } } }
Implement a Java function that takes a string as input and returns true if the string is a palindrome, false otherwise.	```java public class Main { public static void main(String[] args) { System.out.println(isPalindrome("madam")); } public static boolean isPalindrome(String str) { int i = 0, j = str.length() - 1; while (i < j) { if (str.charAt(i) != str.charAt(j)) { return false; } i++; j--; } return true; } }
Write a Java function that takes a list of strings as an input and checks if the list is sorted in alphabetical order. If the list is sorted, the function should return True.	```java public boolean isSortedAlphabetically(List<String> list) { for (int i = 0; i < list.size() - 1; i++) { if (list.get(i).compareTo(list.get(i + 1)) > 0) { return false; } } return true; }
Write a program that asks the user for their favorite food and then prints out a message that says 'My favorite food is {food}!'.	```java import java.util.Scanner; public class Main { public static void main(String[] args) { Scanner scanner = new Scanner(System.in); System.out.print("Enter your favorite food: "); String food = scanner.nextLine(); System.out.println("My favorite food is " + food + "!"); } }
You are given a list of integers. Write a function to find the second largest number in the list.	```java public int secondLargestNumber(List<Integer> list) { if (list.size() < 2) { return -1; } int max = Integer.MIN_VALUE; int secondMax = Integer.MIN_VALUE; for (int i : list) { if (i > max) { secondMax = max; max = i; } else if (i > secondMax && i != max) { secondMax = i; } } return secondMax; }
Write a Java function that takes a string as an input and returns a new string where all vowels are removed.	```java public String removeVowels(String str) { return str.replaceAll("[aeiouAEIOU]", ""); }
You are given a list of integers. Write a function to find the sum of all even numbers in the list.	```java public int sumOfEvenNumbers(List<Integer> list) { int sum = 0; for (int i : list) { if (i % 2 == 0) { sum += i; } } return sum; }
Write a Java function that takes two integers as input and returns their sum if both numbers are even, otherwise, returns their product.	public class Main { public static int calculateSumOrProduct(int num1, int num2) { if (num1 % 2 == 0 && num2 % 2 == 0) { return num1 + num2; } else { return num1 * num2; } } public static void main(String[] args) { int result = calculateSumOrProduct(4, 6); System.out.println(result); } }
Implement a Java function that takes a list of strings as input and returns the longest string in the list.	import java.util.Arrays; public class Main { public static String findLongestString(String[] strArray) { if (strArray == null || strArray.length == 0) { return ""; } String longestStr = strArray[0]; for (String str : strArray) { if (str.length() > longestStr.length()) { longestStr = str; } } return longestStr; } public static void main(String[] args) { String[] strArray = {"apple", "banana", "che…
Write a Java function that takes a string as input and returns true if the string contains only uppercase letters, false otherwise.	public class Main { public static boolean isStringAllUppercase(String inputStr) { for (int i = 0; i < inputStr.length(); i++) { if (!Character.isUpperCase(inputStr.charAt(i))) { return false; } } return true; } public static void main(String[] args) { String inputStr = "HELLO"; boolean result = isStringAllUppercase(inputStr); System.out.println(result); } }
Implement a Java function that takes a list of integers as input and returns the count of all prime numbers in the list.	import java.util.ArrayList; public class Main { public static int countPrimeNumbers(ArrayList<Integer> numList) { int count = 0; for (int num : numList) { if (isPrime(num)) { count++; } } return count; } public static boolean isPrime(int num) { if (num <= 1) { return false; } for (int i = 2; i * i <= num; i++) { if (num % i == 0) { return false; } } return true; } public static void main(String[]…
Write a Java function that takes a string as input and returns the string with all vowels reversed.	public class Main { public static String reverseVowels(String inputStr) { char[] charArray = inputStr.toCharArray(); int left = 0; int right = charArray.length - 1; while (left < right) { if (!isVowel(charArray[left])) { left++; } else if (!isVowel(charArray[right])) { right--; } else { char temp = charArray[left]; charArray[left] = charArray[right]; charArray[right] = temp; left++; right--; } } …
Write a function that finds the maximum value in a given list of integers and returns its index.	```java public int findMaxIndex(int[] list) { int maxIndex = 0; for (int i = 1; i < list.length; i++) { if (list[i] > list[maxIndex]) { maxIndex = i; } } return maxIndex; }
Design a function that accepts a list of integers and returns a new list containing only the even numbers from the input list.	```java public List<Integer> getEvenNumbers(List<Integer> list) { List<Integer> evenNumbers = new ArrayList<>(); for (int num : list) { if (num % 2 == 0) { evenNumbers.add(num); } } return evenNumbers; }
Write a function that takes a string as input, reverses it, and returns the result.	```java public String reverseString(String input) { String reversed = ""; for (int i = input.length() - 1; i >= 0; i--) { reversed += input.charAt(i); } return reversed; }
Design a function that accepts a list of strings and returns the total number of characters in all the strings.	```java public int totalCountOfChars(List<String> list) { int totalCount = 0; for (String str : list) { totalCount += str.length(); } return totalCount; }
Write a function that takes a list of integers, finds the average of all the numbers, and returns it.	```java public double findAverage(List<Integer> list) { int sum = 0; for (int num : list) { sum += num; } return (double) sum / list.size(); }
Write a Java function to find the longest common prefix among an array of strings. For example, if the input array is ["flower", "flow", "flight"], the function should return "fl".	```java public static String longestCommonPrefix(String[] strs) { if (strs == null || strs.length == 0) { return ""; } String prefix = strs[0]; for (int i = 1; i < strs.length; i++) { while (strs[i].indexOf(prefix) != 0) { prefix = prefix.substring(0, prefix.length() - 1); if (prefix.isEmpty()) { return ""; } } } return prefix; }
Write a Java function to find the number of pairs of integers in an array that have a difference of k. For example, if the input array is [1, 2, 3, 4, 5] and k is 1, the function should return 4.	```java public static int findPairsWithDiff(int[] nums, int k) { Map<Integer, Integer> countMap = new HashMap<>(); for (int num : nums) { countMap.put(num, countMap.getOrDefault(num, 0) + 1); } int count = 0; for (int num : countMap.keySet()) { if (countMap.containsKey(num + k)) { count += countMap.get(num) * countMap.get(num + k); } } return count; }
Write a Java function to find the maximum product of three numbers in an array. For example, if the input array is [1, 2, 3, 4, 5], the function should return 60.	```java public static int maximumProduct(int[] nums) { Arrays.sort(nums); int n = nums.length; return Math.max(nums[0] * nums[1] * nums[n - 1], nums[n - 1] * nums[n - 2] * nums[n - 3]); }
Write a Java function to implement a Caesar cipher, which is a type of substitution cipher where each letter in the plaintext is 'shifted' a certain number of places down the alphabet. For example, with a shift of 1, A would be replaced by B, B would become C, and so on.	```java public static String caesarCipher(String str, int shift) { StringBuilder result = new StringBuilder(); for (char c : str.toCharArray()) { if (Character.isLetter(c)) { char base = Character.isUpperCase(c) ? 'A' : 'a'; result.append((char) ((c - base + shift) % 26 + base)); } else { result.append(c); } } return result.toString(); }
Write a Java function to determine whether a given string is a palindrome, considering only alphanumeric characters and ignoring case.	```java public static boolean isPalindrome(String str) { str = str.replaceAll("[^a-zA-Z0-9]", "").toLowerCase(); int left = 0; int right = str.length() - 1; while (left < right) { if (str.charAt(left) != str.charAt(right)) { return false; } left++; right--; } return true; }
Create a Java function that takes a list of strings as input. The function should return the longest string from the list.	public static String longestString(List<String> strings) { String longest = ""; for (String s : strings) { if (s.length() > longest.length()) { longest = s; } } return longest; }
Write a Java function to count the number of prime numbers less than or equal to a given number.	public static int countPrimes(int n) { boolean[] prime = new boolean[n + 1]; for (int i = 0; i <= n; i++) { prime[i] = true; } prime[0] = prime[1] = false; for (int i = 2; i * i <= n; i++) { if (prime[i]) { for (int j = i * i; j <= n; j += i) { prime[j] = false; } } } int count = 0; for (int i = 2; i <= n; i++) { if (prime[i]) { count++; } } return count; }
Create a Java function that takes a list of integers as input. The function should return a new list with all even numbers from the original list.	public static List<Integer> getEvenNumbers(List<Integer> numbers) { List<Integer> evenNumbers = new ArrayList<>(); for (int num : numbers) { if (num % 2 == 0) { evenNumbers.add(num); } } return evenNumbers; }
Write a Java function to check if a given string is a palindrome.	public static boolean isPalindrome(String s) { int i = 0, j = s.length() - 1; while (i < j) { if (s.charAt(i) != s.charAt(j)) { return false; } i++; j--; } return true; }
Create a Java function that takes two lists of integers as input. The function should return the intersection of the two lists.	public static List<Integer> getIntersection(List<Integer> list1, List<Integer> list2) { List<Integer> intersection = new ArrayList<>(); for (int num : list1) { if (list2.contains(num) && !intersection.contains(num)) { intersection.add(num); } } return intersection; }
Write a Java program to find all possible combinations of a given string.	```java import java.util.ArrayList; import java.util.List; public class Main { public static List<String> getAllCombinations(String str) { List<String> combinations = new ArrayList<>(); getAllCombinationsUtil(str, "", combinations); return combinations; } private static void getAllCombinationsUtil(String str, String prefix, List<String> combinations) { if (str.isEmpty()) { combinations.add(prefix…
Implement a function that takes a list of integers as input and returns the count of even numbers in the list.	```java public class Main { public static int countEvenNumbers(List<Integer> numbers) { int count = 0; for (int number : numbers) { if (number % 2 == 0) { count++; } } return count; } public static void main(String[] args) { List<Integer> numbers = Arrays.asList(1, 2, 3, 4, 5, 6); int count = countEvenNumbers(numbers); System.out.println("Count of even numbers: " + count); } }
Write a Java program to find the maximum sum of a subarray within a given array of integers.	```java public class Main { public static int maxSubArraySum(int[] arr) { int maxSoFar = arr[0]; int currMax = arr[0]; for (int i = 1; i < arr.length; i++) { currMax = Math.max(arr[i], currMax + arr[i]); maxSoFar = Math.max(maxSoFar, currMax); } return maxSoFar; } public static void main(String[] args) { int[] arr = { -2, -3, 4, -1, -2, 1, 5, -3 }; int maxSum = maxSubArraySum(arr); System.out.pri…
Implement a function to find the first duplicate in a given array of integers.	```java import java.util.HashMap; import java.util.Map; public class Main { public static Integer findFirstDuplicate(int[] arr) { Map<Integer, Integer> map = new HashMap<>(); for (int i = 0; i < arr.length; i++) { if (map.containsKey(arr[i])) { return arr[i]; } map.put(arr[i], i); } return null; } public static void main(String[] args) { int[] arr = { 2, 1, 3, 5, 3, 2 }; Integer duplicate = findF…
Write a Java program to find the nth Fibonacci number.	```java public class Main { public static int fibonacci(int n) { if (n <= 1) { return n; } int[] fib = new int[n + 1]; fib[0] = 0; fib[1] = 1; for (int i = 2; i <= n; i++) { fib[i] = fib[i - 1] + fib[i - 2]; } return fib[n]; } public static void main(String[] args) { int n = 10; int fibNumber = fibonacci(n); System.out.println("Fibonacci number at position " + n + ": " + fibNumber); } } ```
Write a function that takes a list of strings as input and returns the length of the longest string in the list.	```java public int findLongestStringLength(List<String> strings) { int maxLength = 0; for (String str : strings) { if (str.length() > maxLength) { maxLength = str.length(); } } return maxLength; }
Create a Java function that takes a map as input and returns a new map that has all the values multiplied by 2.	```java public Map<String, Integer> multiplyValuesByTwo(Map<String, Integer> map) { Map<String, Integer> newMap = new HashMap<>(); for (Map.Entry<String, Integer> entry : map.entrySet()) { newMap.put(entry.getKey(), entry.getValue() * 2); } return newMap; }
Write a function that takes a list of integers as input and returns true if the list is in ascending order, false otherwise.	```java public boolean isAscendingOrder(List<Integer> list) { for (int i = 0; i < list.size() - 1; i++) { if (list.get(i) > list.get(i + 1)) { return false; } } return true; }
Create a Java function that takes a set of strings as input and returns a new set that contains all the strings in uppercase.	```java public Set<String> convertToUppercase(Set<String> set) { Set<String> newSet = new HashSet<>(); for (String str : set) { newSet.add(str.toUpperCase()); } return newSet; }
Write a function that takes a list of integers as input and returns the count of even numbers in the list.	```java public int countEvenNumbers(List<Integer> list) { int count = 0; for (int num : list) { if (num % 2 == 0) { count++; } } return count; }
Write a function that takes a string as input and returns the string with all digits removed.	public String removeDigits(String input) { String output = ""; for (int i = 0; i < input.length(); i++) { char c = input.charAt(i); if (!Character.isDigit(c)) { output += c; } } return output; }
Write a function that takes a list of strings as input and returns a new list with all strings shortened to a maximum of 10 characters.	public List<String> shortenStrings(List<String> input) { List<String> output = new ArrayList<>(); for (String s : input) { if (s.length() > 10) { output.add(s.substring(0, 10)); } else { output.add(s); } } return output; }
Create a Java function that takes an integer as input and returns the sum of the digits of the integer.	public int sumOfDigits(int input) { int sum = 0; while (input != 0) { sum += input % 10; input /= 10; } return sum; }
Write a function that takes a list of integers as input and returns the average of the integers in the list.	public double averageOfList(List<Integer> input) { int sum = 0; for (int i : input) { sum += i; } return (double) sum / input.size(); }
Write a function that takes a string as input and returns True if the string starts with an uppercase letter, and False otherwise.	public boolean startsWithUppercase(String input) { if (input.length() == 0) { return false; } char c = input.charAt(0); return Character.isUpperCase(c); }
Create a function that takes a list of integers as input and returns the second largest number in the list.	```java public int secondLargestNumber(int[] numbers) { int max = Integer.MIN_VALUE; int secondMax = Integer.MIN_VALUE; for (int num : numbers) { if (num > max) { secondMax = max; max = num; } else if (num > secondMax && num != max) { secondMax = num; } } if (secondMax == Integer.MIN_VALUE) { return -1; // Return -1 if there's no second largest number } return secondMax; }
Write a Java function to find the first duplicate element in a given array of integers.	```java public int firstDuplicate(int[] arr) { HashMap<Integer, Integer> map = new HashMap<>(); for (int i = 0; i < arr.length; i++) { if (map.containsKey(arr[i])) { return arr[i]; } else { map.put(arr[i], i); } } return -1; // Return -1 if there's no duplicate element }
Create a function that takes a string as input and returns the number of vowels in the string.	```java public int countVowels(String str) { str = str.toLowerCase(); int count = 0; for (char c : str.toCharArray()) { if (c == 'a' || c == 'e' || c == 'i' || c == 'o' || c == 'u') { count++; } } return count; }
Write a Java function to find the longest common prefix among a list of strings.	```java public String longestCommonPrefix(String[] strs) { if (strs == null || strs.length == 0) { return ""; } Arrays.sort(strs); String first = strs[0]; String last = strs[strs.length - 1]; int i = 0; while (i < first.length() && i < last.length() && first.charAt(i) == last.charAt(i)) { i++; } return first.substring(0, i); }
Create a function that takes a list of strings as input and returns a new list containing only the strings that are longer than a certain length.	```java public List<String> filterLongStrings(List<String> strs, int minLength) { List<String> result = new ArrayList<>(); for (String str : strs) { if (str.length() > minLength) { result.add(str); } } return result; }
Write a function that takes in a list of strings and returns the strings in uppercase.	```java public class Main { public static String[] uppercaseStrings(String[] strings) { for (int i = 0; i < strings.length; i++) { strings[i] = strings[i].toUpperCase(); } return strings; } public static void main(String[] args) { String[] strings = {"hello", "world", "java"}; String[] uppercase = uppercaseStrings(strings); for (String s : uppercase) { System.out.println(s); } } }
Given a list of integers, write a function that finds the maximum sum of a contiguous subarray within the one-dimensional array of numbers.	```java public class Main { public static int maxSubArraySum(int[] arr) { int maxSoFar = arr[0]; int currMax = arr[0]; for (int i = 1; i < arr.length; i++) { currMax = Math.max(arr[i], currMax + arr[i]); maxSoFar = Math.max(maxSoFar, currMax); } return maxSoFar; } public static void main(String[] args) { int[] arr = {-2, -3, 4, -1, -2, 1, 5, -3}; System.out.println("Maximum contiguous sum is " + …
Write a function that takes a string as input and returns True if it is a palindrome, and False otherwise.	```java public class Main { public static boolean isPalindrome(String s) { int i = 0, j = s.length() - 1; while (i < j) { if (s.charAt(i) != s.charAt(j)) { return false; } i++; j--; } return true; } public static void main(String[] args) { String s = "madam"; System.out.println(isPalindrome(s)); } }
Given a list of integers, write a function that finds the first duplicate in the list.	```java public class Main { public static Integer firstDuplicate(int[] arr) { java.util.HashMap<Integer, Boolean> map = new java.util.HashMap<Integer, Boolean>(); for (int num : arr) { if (map.containsKey(num)) { return num; } else { map.put(num, true); } } return null; } public static void main(String[] args) { int[] arr = {2, 1, 3, 5, 3, 2}; System.out.println("First duplicate is " + firstDupli…
Write a function that takes a list of strings as input and returns the string with the maximum length.	```java public class Main { public static String longestString(String[] strings) { String longest = ""; for (String s : strings) { if (s.length() > longest.length()) { longest = s; } } return longest; } public static void main(String[] args) { String[] strings = {"apple", "banana", "cherry", "date"}; System.out.println("Longest string is " + longestString(strings)); } }
Write a Java function that takes two arrays of integers and returns a new array with the elements from both arrays in alternating order.	```java public static int[] alternateArrays(int[] arr1, int[] arr2) { int[] result = new int[arr1.length + arr2.length]; int idx = 0; for (int i = 0; i < Math.min(arr1.length, arr2.length); i++) { result[idx++] = arr1[i]; result[idx++] = arr2[i]; } if (arr1.length > arr2.length) { for (int i = arr2.length; i < arr1.length; i++) { result[idx++] = arr1[i]; } } else { for (int i = arr1.length; i < a…
You are given a list of strings. Write a Java function to return the longest string in the list.	```java public static String longestString(String[] strings) { String longest = ""; for (String str : strings) { if (str.length() > longest.length()) { longest = str; } } return longest; }
Write a Java function that takes an array of integers and returns the second largest element in the array.	```java public static int secondLargest(int[] arr) { int max = Integer.MIN_VALUE; int secondMax = Integer.MIN_VALUE; for (int num : arr) { if (num > max) { secondMax = max; max = num; } else if (num > secondMax && num != max) { secondMax = num; } } return secondMax; }
You are given a string. Write a Java function to return the string with all vowels removed.	```java public static String removeVowels(String str) { StringBuilder result = new StringBuilder(); for (char c : str.toCharArray()) { if (!isVowel(c)) { result.append(c); } } return result.toString(); } public static boolean isVowel(char c) { c = Character.toLowerCase(c); return c == 'a' || c == 'e' || c == 'i' || c == 'o' || c == 'u'; }
Implement a Java function that takes a 2D array of integers and returns the sum of all elements in the array.	```java public static int sum2DArray(int[][] arr) { int sum = 0; for (int[] row : arr) { for (int num : row) { sum += num; } } return sum; }
Write a function that takes a list of integers as input and returns the count of even numbers in the list.	```java public int countEvenNumbers(List<Integer> numbers) { int count = 0; for (int number : numbers) { if (number % 2 == 0) { count++; } } return count; }
Write a Java function that takes a string as input and returns the string in uppercase.	```java public String toUpperCase(String str) { return str.toUpperCase(); }
Implement a function that takes a list of integers as input and returns True if all integers in the list are unique, False otherwise.	```java public boolean areAllUnique(List<Integer> numbers) { Set<Integer> set = new HashSet<>(numbers); return set.size() == numbers.size(); }
Design a Java function that accepts a list of strings as input and returns the total length of all strings in the list.	```java public int totalStringLength(List<String> strings) { int totalLength = 0; for (String str : strings) { totalLength += str.length(); } return totalLength; }
Write a function that takes a list of integers as input and returns the product of all integers in the list.	```java public int productOfList(List<Integer> numbers) { int product = 1; for (int number : numbers) { product *= number; } return product; }
Write a function to calculate the sum of the digits of a given integer number.	public int sumOfDigits(int num) { int sum = 0; while (num != 0) { sum += num % 10; num /= 10; } return sum; }
You are given an array of integers and a target average. Determine whether it is possible to get a target average from a subset of the array elements.	public boolean possibleAverage(double[] arr, double target) { Arrays.sort(arr); double sum = 0; for (int i = arr.length - 1; i >= 0; i--) { sum += arr[i]; if (sum / (arr.length - i) == target) { return true; } } return false; }
Write a function that takes a string and returns a string where each occurrence of a character is followed by its frequency in the string.	public String charFrequency(String str) { HashMap<Character, Integer> freq = new HashMap<>(); for (char c : str.toCharArray()) { freq.put(c, freq.getOrDefault(c, 0) + 1); } StringBuilder result = new StringBuilder(); for (char c : str.toCharArray()) { result.append(c).append(freq.get(c)); } return result.toString(); }
Given a list of integers, write a function to count the number of pairs with a given difference.	public int countPairsWithDiff(int[] arr, int diff) { HashMap<Integer, Integer> freq = new HashMap<>(); for (int num : arr) { freq.put(num, freq.getOrDefault(num, 0) + 1); } int count = 0; for (int num : arr) { if (freq.containsKey(num - diff)) { count += freq.get(num - diff); } } return count; }
Create a function that takes a string and returns the longest substring that contains at most two distinct characters.	public String longestSubstringWithTwoChars(String str) { HashMap<Character, Integer> freq = new HashMap<>(); int start = 0, maxLen = 0, maxStart = 0; for (int end = 0; end < str.length(); end++) { freq.put(str.charAt(end), freq.getOrDefault(str.charAt(end), 0) + 1); while (freq.size() > 2) { freq.put(str.charAt(start), freq.get(str.charAt(start)) - 1); if (freq.get(str.charAt(start)) == 0) { freq…
Write a function that takes a list of strings as input and returns the string with the maximum length.	```java public class Main { public static String findLongestString(List<String> list) { String longestString = list.get(0); for (String str : list) { if (str.length() > longestString.length()) { longestString = str; } } return longestString; } public static void main(String[] args) { List<String> list = new ArrayList<>(); list.add("apple"); list.add("banana"); list.add("cherry"); System.out.print…
Write a function that takes a list of integers as input and returns the count of even numbers in the list.	```java public class Main { public static int countEvenNumbers(List<Integer> list) { int count = 0; for (int num : list) { if (num % 2 == 0) { count++; } } return count; } public static void main(String[] args) { List<Integer> list = new ArrayList<>(); list.add(1); list.add(2); list.add(3); list.add(4); System.out.println(countEvenNumbers(list)); } }
Write a function that takes a string as input and returns the string in reverse order.	```java public class Main { public static String reverseString(String str) { String reversedStr = ""; for (int i = str.length() - 1; i >= 0; i--) { reversedStr += str.charAt(i); } return reversedStr; } public static void main(String[] args) { String str = "hello"; System.out.println(reverseString(str)); } }
Write a function that takes a list of integers as input and returns the second largest number in the list.	```java public class Main { public static int findSecondLargest(List<Integer> list) { int largest = Integer.MIN_VALUE; int secondLargest = Integer.MIN_VALUE; for (int num : list) { if (num > largest) { secondLargest = largest; largest = num; } else if (num > secondLargest && num != largest) { secondLargest = num; } } return secondLargest; } public static void main(String[] args) { List<Integer> l…
Write a function that takes a list of integers as input and returns True if the list is in ascending order, False otherwise.	```java public class Main { public static boolean isAscendingOrder(List<Integer> list) { for (int i = 0; i < list.size() - 1; i++) { if (list.get(i) > list.get(i + 1)) { return false; } } return true; } public static void main(String[] args) { List<Integer> list = new ArrayList<>(); list.add(1); list.add(2); list.add(3); list.add(4); System.out.println(isAscendingOrder(list)); } }
Implement a Java function that calculates the sum of all elements in a 2D array of integers.	```java public class Main { public static int calculateSum(int[][] array) { int sum = 0; for (int i = 0; i < array.length; i++) { for (int j = 0; j < array[i].length; j++) { sum += array[i][j]; } } return sum; } public static void main(String[] args) { int[][] array = {{1, 2, 3}, {4, 5, 6}, {7, 8, 9}}; System.out.println("Sum: " + calculateSum(array)); } }
Write a function that takes a list of strings as input and returns True if at least two strings have the same length, and False otherwise.	```java import java.util.*; public class Main { public static boolean hasDuplicateLength(List<String> list) { Set<Integer> lengths = new HashSet<>(); for (String str : list) { if (!lengths.add(str.length())) { return true; } } return false; } public static void main(String[] args) { List<String> list = Arrays.asList("hello", "world", "abc", "xyz"); System.out.println("Has duplicate length: " + ha…
Create a Java class called Student that has attributes for the student's name, age, and course. The class should have methods to display the student information and to update the course.	```java public class Student { private String name; private int age; private String course; public Student(String name, int age, String course) { this.name = name; this.age = age; this.course = course; } public void displayInfo() { System.out.println("Name: " + name); System.out.println("Age: " + age); System.out.println("Course: " + course); } public void updateCourse(String newCourse) { this.co…
Write a function that takes a list of integers as input and returns the maximum number of consecutive 1's in the list.	```java public class Main { public static int.maxConsecutiveOnes(List<Integer> list) { int maxCount = 0; int currentCount = 0; for (int num : list) { if (num == 1) { currentCount++; maxCount = Math.max(maxCount, currentCount); } else { currentCount = 0; } } return maxCount; } public static void main(String[] args) { List<Integer> list = Arrays.asList(1, 0, 1, 1, 0, 1, 1, 1, 0, 1); System.out.prin…
Implement a Java function that takes a list of strings as input and returns a new list containing only the strings that start with a vowel.	```java import java.util.*; public class Main { public static List<String> filterVowelStrings(List<String> list) { List<String> result = new ArrayList<>(); for (String str : list) { if (str.length() > 0 && "AEIOUaeiou".indexOf(str.charAt(0)) != -1) { result.add(str); } } return result; } public static void main(String[] args) { List<String> list = Arrays.asList("apple", "banana", "orange", "egg",…
Write a Java function that takes a list of strings as input where each string represents a word. The function should return a dictionary where the keys are the words and the values are the lengths of the corresponding words.	import java.util.HashMap; import java.util.Map; public class Main { public static Map<String, Integer> wordLengths(String[] words) { Map<String, Integer> result = new HashMap<>(); for (String word : words) { result.put(word, word.length()); } return result; } }
Write a Java function that takes an integer n as input and returns a string containing all prime numbers less than or equal to n separated by commas.	import java.util.StringJoiner; public class Main { public static boolean isPrime(int num) { if (num <= 1) { return false; } for (int i = 2; i * i <= num; i++) { if (num % i == 0) { return false; } } return true; } public static String primeNumbers(int n) { StringJoiner joiner = new StringJoiner(","); for (int i = 2; i <= n; i++) { if (isPrime(i)) { joiner.add(String.valueOf(i)); } } return joiner…
Write a Java function that takes a list of integers as input and returns the count of each digit in the list.	import java.util.HashMap; import java.util.Map; public class Main { public static Map<Integer, Integer> digitCounts(int[] numbers) { Map<Integer, Integer> countMap = new HashMap<>(); for (int num : numbers) { while (num != 0) { int digit = num % 10; countMap.put(digit, countMap.getOrDefault(digit, 0) + 1); num /= 10; } } return countMap; } }
Write a Java function that takes an integer n as input and returns the sum of the cubes of all numbers from 1 to n.	public class Main { public static long cubeSum(int n) { long sum = 0; for (int i = 1; i <= n; i++) { sum += i * i * i; } return sum; } }
Write a Java function that takes a list of integers as input and returns a boolean indicating whether the list contains at least one pair of identical adjacent elements.	public class Main { public static boolean hasAdjacentDuplicates(int[] numbers) { for (int i = 0; i < numbers.length - 1; i++) { if (numbers[i] == numbers[i + 1]) { return true; } } return false; } }
Create a Java function to count the number of occurrences of a given number in an array of integers.	```java public int countOccurrences(int[] array, int target) { int count = 0; for (int num : array) { if (num == target) { count++; } } return count; }
Write a Java function that takes a list of strings as input and returns a new list that contains all the strings from the original list, but in uppercase.	```java import java.util.ArrayList; import java.util.List; public List<String> toUppercase(List<String> strings) { List<String> uppercaseStrings = new ArrayList<>(); for (String str : strings) { uppercaseStrings.add(str.toUpperCase()); } return uppercaseStrings; }
Implement a Java function that takes a 2D array of integers as input and returns the sum of all the elements in the array.	```java public int sum2DArray(int[][] array) { int sum = 0; for (int[] row : array) { for (int num : row) { sum += num; } } return sum; }
Write a Java function that takes a list of integers as input and returns a new list that contains only the numbers that are greater than a given threshold.	```java import java.util.ArrayList; import java.util.List; public List<Integer> filterNumbers(List<Integer> numbers, int threshold) { List<Integer> filteredNumbers = new ArrayList<>(); for (int num : numbers) { if (num > threshold) { filteredNumbers.add(num); } } return filteredNumbers; }
Create a Java function to find the longest string in a given list of strings.	```java public String findLongestString(List<String> strings) { String longestString = ""; for (String str : strings) { if (str.length() > longestString.length()) { longestString = str; } } return longestString; }
Write a function that takes a string as an input and returns the number of vowels in the string.	public int countVowels(String str) { str = str.toLowerCase(); int count = 0; for(int i = 0; i < str.length(); i++) { char c = str.charAt(i); if(c == 'a' || c == 'e' || c == 'i' || c == 'o' || c == 'u') { count++; } } return count; }
Write a function that takes a list of numbers as input and returns the number of even numbers in the list.	public int countEvens(int[] numbers) { int count = 0; for(int num : numbers) { if(num % 2 == 0) { count++; } } return count; }
You are given a list of strings as input, where each string represents a line in a text file. Write a function that takes this list as input and returns the total number of characters in all the lines.	public int totalChars(List<String> lines) { int total = 0; for(String line : lines) { total += line.length(); } return total; }
Write a function that takes a list of numbers as input and returns the maximum number in the list.	public int findMax(int[] numbers) { int max = numbers[0]; for(int i = 1; i < numbers.length; i++) { if(numbers[i] > max) { max = numbers[i]; } } return max; }
You are given a string as input. Write a function that takes this string as an argument and returns True if the string is a palindrome (reads the same forwards and backwards), and False otherwise.	public boolean isPalindrome(String str) { String reversed = new StringBuilder(str).reverse().toString(); return str.equals(reversed); }
Create a Java function that takes a string as input and returns the string with all occurrences of the substring "hello" removed.	public String removeSubstring(String str) { return str.replace("hello", ""); }
Write a Java function that takes a list of strings as input and returns the count of strings that start with the letter "a".	public int countStringsStartingWithA(List<String> list) { int count = 0; for (String str : list) { if (str.startsWith("a")) { count++; } } return count; }
You are given a list of integers. Write a Java function to find the second largest number in the list.	public int secondLargestNumber(List<Integer> list) { int max = Integer.MIN_VALUE; int secondMax = Integer.MIN_VALUE; for (int num : list) { if (num > max) { secondMax = max; max = num; } else if (num > secondMax && num != max) { secondMax = num; } } return secondMax; }
Write a Java function that takes a list of strings as input and returns the longest string in the list.	public String longestString(List<String> list) { String longest = ""; for (String str : list) { if (str.length() > longest.length()) { longest = str; } } return longest; }
You are given a list of integers. Write a Java function to find the count of even numbers in the list.	public int countEvenNumbers(List<Integer> list) { int count = 0; for (int num : list) { if (num % 2 == 0) { count++; } } return count; }
Write a function to calculate the sum of all the elements in a given integer array.	```java public int sumArrayElements(int[] array) { int sum = 0; for (int element : array) { sum += element; } return sum; }
Write a function that takes a string as input and returns the string with all vowels removed.	```java public String removeVowels(String str) { String vowels = "aeiouAEIOU"; StringBuilder result = new StringBuilder(); for (char c : str.toCharArray()) { if (!vowels.indexOf(c) >= 0) { result.append(c); } } return result.toString(); }
Write a function to find the maximum element in a given integer array.	```java public int findMaxElement(int[] array) { int max = array[0]; for (int element : array) { if (element > max) { max = element; } } return max; }
Write a function that takes a string as input and returns the string with all spaces replaced with underscores.	```java public String replaceSpacesWithUnderscores(String str) { return str.replace(" ", "_"); }
Write a function to reverse the elements of a given integer array.	```java public int[] reverseArray(int[] array) { int start = 0; int end = array.length - 1; while (start < end) { int temp = array[start]; array[start] = array[end]; array[end] = temp; start++; end--; } return array; }
Write a Java function that takes a list of integers as input and returns the count of all the even numbers in the list.	```java import java.util.List; public class Main { public static int countEvenNumbers(List<Integer> numbers) { int count = 0; for (int num : numbers) { if (num % 2 == 0) { count++; } } return count; } }
Create a Java function to find the longest word in a given string.	```java import java.util.Arrays; public class Main { public static String longestWord(String str) { String[] words = str.split(" "); String longest = words[0]; for (String word : words) { if (word.length() > longest.length()) { longest = word; } } return longest; } }
Write a Java function that takes a list of characters as input and returns the count of all the vowels in the list.	```java import java.util.List; public class Main { public static int countVowels(List<Character> chars) { int count = 0; for (char c : chars) { if (c == 'a' || c == 'e' || c == 'i' || c == 'o' || c == 'u' || c == 'A' || c == 'E' || c == 'I' || c == 'O' || c == 'U') { count++; } } return count; } }
Create a Java function to find the first duplicate in a given array of integers.	```java import java.util.HashSet; import java.util.Set; public class Main { public static Integer firstDuplicate(int[] arr) { Set<Integer> set = new HashSet<>(); for (int num : arr) { if (!set.add(num)) { return num; } } return null; } }
Write a Java function that takes a string as input and returns the string with all the characters reversed.	```java public class Main { public static String reverseString(String str) { StringBuilder reversed = new StringBuilder(); for (int i = str.length() - 1; i >= 0; i--) { reversed.append(str.charAt(i)); } return reversed.toString(); } }
Create a function that takes a string as input and returns true if it is a valid pangram, false otherwise.	```java public class Main { public static boolean isPangram(String str) { str = str.toLowerCase(); for (char c = 'a'; c <= 'z'; c++) { if (!str.contains(String.valueOf(c))) { return false; } } return true; } public static void main(String[] args) { String str = "The quick brown fox jumps over the lazy dog"; System.out.println(isPangram(str)); } }
You are given a list of integers and an integer n. Write a function to return the sum of all numbers in the list that are greater than or equal to n.	```java public class Main { public static int sumGreaterOrEqual(int[] arr, int n) { int sum = 0; for (int i : arr) { if (i >= n) { sum += i; } } return sum; } public static void main(String[] args) { int[] arr = {1, 2, 3, 4, 5}; int n = 3; System.out.println(sumGreaterOrEqual(arr, n)); } }
Write a function that takes a list of strings as input and returns the longest string in the list.	```java public class Main { public static String findLongestString(String[] arr) { String longest = arr[0]; for (String str : arr) { if (str.length() > longest.length()) { longest = str; } } return longest; } public static void main(String[] args) { String[] arr = {"apple", "banana", "orange", "grape"}; System.out.println(findLongestString(arr)); } }
Create a function that takes two strings as input and returns true if they are anagrams of each other, false otherwise.	```java public class Main { public static boolean areAnagrams(String str1, String str2) { if (str1.length() != str2.length()) { return false; } char[] arr1 = str1.toLowerCase().toCharArray(); char[] arr2 = str2.toLowerCase().toCharArray(); java.util.Arrays.sort(arr1); java.util.Arrays.sort(arr2); return java.util.Arrays.equals(arr1, arr2); } public static void main(String[] args) { String str1 = …
You are given a list of integers and a number k. Write a function to return the kth smallest number in the list.	```java public class Main { public static int findKthSmallest(int[] arr, int k) { java.util.Arrays.sort(arr); return arr[k - 1]; } public static void main(String[] args) { int[] arr = {5, 3, 8, 4, 2}; int k = 3; System.out.println(findKthSmallest(arr, k)); } }
You are given a string. Write a function to find the longest substring without repeating characters in the given string.	```java public String longestSubstring(String s) { int n = s.length(); Set<Character> set = new HashSet<>(); int ans = 0, i = 0, j = 0; String longestSubstring = ""; while (j < n) { // Try to extend the range [i, j] if (!set.contains(s.charAt(j))) { set.add(s.charAt(j++)); if (j - i > ans) { ans = j - i; longestSubstring = s.substring(i, j); } } else { set.remove(s.charAt(i++)); } } return longes…
You are given two lists of integers of the same size. Write a function to find the indices of the elements that are equal in both lists.	```java public List<Integer> findEqualIndices(List<Integer> list1, List<Integer> list2) { List<Integer> indices = new ArrayList<>(); for (int i = 0; i < list1.size(); i++) { if (list1.get(i).equals(list2.get(i))) { indices.add(i); } } return indices; }
You are given a binary tree. Write a function to find the maximum depth of the binary tree.	```java public int maxDepth(TreeNode root) { if (root == null) { return 0; } else { int leftDepth = maxDepth(root.left); int rightDepth = maxDepth(root.right); return Math.max(leftDepth, rightDepth) + 1; } }
You are given a list of strings. Write a function to find the longest common prefix among all strings in the list.	```java public String longestCommonPrefix(List<String> strs) { if (strs.isEmpty()) { return ""; } String prefix = strs.get(0); for (String str : strs) { while (!str.startsWith(prefix)) { prefix = prefix.substring(0, prefix.length() - 1); if (prefix.isEmpty()) { return ""; } } } return prefix; }
You are given two lists of integers. Write a function to find the intersection of the two lists, i.e., return a list of elements that are present in both lists.	```java public List<Integer> intersection(List<Integer> list1, List<Integer> list2) { List<Integer> intersection = new ArrayList<>(); for (int num : list1) { if (list2.contains(num)) { intersection.add(num); } } return intersection; }
Write a function that takes a string as input and returns the string with all parentheses removed.	```java public String removeParentheses(String str) { StringBuilder sb = new StringBuilder(); for (char c : str.toCharArray()) { if (c != '(' && c != ')') { sb.append(c); } } return sb.toString(); }
Write a function that takes two strings as input and returns true if the two strings are anagrams of each other, false otherwise.	```java public boolean areAnagrams(String str1, String str2) { if (str1.length() != str2.length()) { return false; } char[] charArray1 = str1.toCharArray(); char[] charArray2 = str2.toCharArray(); Arrays.sort(charArray1); Arrays.sort(charArray2); return Arrays.equals(charArray1, charArray2); }
Write a function that takes a list of integers as input and returns the second largest element in the list. If there is no second largest element, return -1.	```java public int secondLargestElement(List<Integer> list) { if (list.size() < 2) { return -1; } int max = list.get(0); int secondMax = -1; for (int i = 1; i < list.size(); i++) { if (list.get(i) > max) { secondMax = max; max = list.get(i); } else if (list.get(i) > secondMax && list.get(i) != max) { secondMax = list.get(i); } } return secondMax; }
Write a function that takes a string as input and returns the string with all words reversed.	```java public String reverseWords(String str) { String[] words = str.split(" "); StringBuilder sb = new StringBuilder(); for (String word : words) { sb.append(new StringBuilder(word).reverse().toString()); sb.append(" "); } return sb.toString().trim(); }
Write a function that takes a list of integers as input and returns the list with all duplicates removed.	```java public List<Integer> removeDuplicates(List<Integer> list) { Set<Integer> set = new HashSet<>(list); return new ArrayList<>(set); }
Create a Java function that takes a string as an input and returns the longest word in the string.	public class Main { public static String longestWord(String str) { String[] words = str.split(" "); String longest = ""; for (String word : words) { if (word.length() > longest.length()) { longest = word; } } return longest; } public static void main(String[] args) { System.out.println(longestWord("Hello World this is a test")); } }
Write a function that takes an array of integers as input and returns the second largest number in the array.	public class Main { public static int secondLargest(int[] arr) { int max = Integer.MIN_VALUE; int secondMax = Integer.MIN_VALUE; for (int i : arr) { if (i > max) { secondMax = max; max = i; } else if (i > secondMax && i != max) { secondMax = i; } } return secondMax; } public static void main(String[] args) { int[] arr = {1, 2, 3, 4, 5}; System.out.println(secondLargest(arr)); } }
Create a Java function that takes a list of strings as input and returns the list of strings in reverse order.	public class Main { public static String[] reverseStrings(String[] strings) { String[] reversed = new String[strings.length]; for (int i = 0; i < strings.length; i++) { reversed[i] = strings[strings.length - i - 1]; } return reversed; } public static void main(String[] args) { String[] strings = {"hello", "world", "java", "programming"}; String[] reversed = reverseStrings(strings); for (String s …
Write a function that takes an array of integers as input and returns the average of the array.	public class Main { public static double average(int[] arr) { int sum = 0; for (int i : arr) { sum += i; } return (double) sum / arr.length; } public static void main(String[] args) { int[] arr = {1, 2, 3, 4, 5}; System.out.println(average(arr)); } }
Create a Java function that takes two strings as input and returns true if the two strings are anagrams of each other, false otherwise.	public class Main { public static boolean areAnagrams(String str1, String str2) { if (str1.length() != str2.length()) { return false; } char[] charArray1 = str1.toLowerCase().toCharArray(); char[] charArray2 = str2.toLowerCase().toCharArray(); java.util.Arrays.sort(charArray1); java.util.Arrays.sort(charArray2); return java.util.Arrays.equals(charArray1, charArray2); } public static void main(Str…
Given a list of integers `nums`, write a function to find the maximum sum of a subarray within the given array.	```java public int maxSubArraySum(int[] nums) { int maxCurrent = nums[0]; int maxGlobal = nums[0]; for (int i = 1; i < nums.length; i++) { maxCurrent = Math.max(nums[i], maxCurrent + nums[i]); maxGlobal = Math.max(maxGlobal, maxCurrent); } return maxGlobal; }
Write a function to check if a given string `s` is a palindrome.	```java public boolean isPalindrome(String s) { int i = 0, j = s.length() - 1; while (i < j) { if (s.charAt(i) != s.charAt(j)) { return false; } i++; j--; } return true; }
Design a function to find the first duplicate in a given array of integers `arr`.	```java public int firstDuplicate(int[] arr) { Map<Integer, Integer> map = new HashMap<>(); for (int i = 0; i < arr.length; i++) { if (map.containsKey(arr[i])) { return arr[i]; } map.put(arr[i], i); } return -1; }
Write a function to count the occurrences of a given character `c` in a string `s`.	```java public int charCount(String s, char c) { int count = 0; for (int i = 0; i < s.length(); i++) { if (s.charAt(i) == c) { count++; } } return count; }
Develop a function to check if a given string `s` can be formed by concatenating substrings from a given array of strings `words`.	```java public boolean canFormString(String s, String[] words) { Set<String> set = new HashSet<>(Arrays.asList(words)); for (int i = 0; i < s.length(); i++) { for (int j = i + 1; j <= s.length(); j++) { String substr = s.substring(i, j); if (set.contains(substr) && canFormString(s.substring(j), words)) { return true; } } } return false; }
Write a function that takes a string as an input and returns the string with all vowels removed.	public String removeVowels(String input) { String vowels = "aeiouAEIOU"; StringBuilder output = new StringBuilder(); for (char c : input.toCharArray()) { if (!vowels.contains(String.valueOf(c))) { output.append(c); } } return output.toString(); }
Create a Java function that calculates the average of all the elements in a given array.	public double calculateAverage(int[] array) { int sum = 0; for (int i = 0; i < array.length; i++) { sum += array[i]; } return (double) sum / array.length; }
Write a function that takes a list of strings as input and returns the string with the maximum length.	public String findLongestString(List<String> strings) { String longestString = ""; for (String s : strings) { if (s.length() > longestString.length()) { longestString = s; } } return longestString; }
Create a Java function that takes a 2D array of integers as input and returns the sum of all the elements in the array.	public int sum2DArray(int[][] array) { int sum = 0; for (int i = 0; i < array.length; i++) { for (int j = 0; j < array[i].length; j++) { sum += array[i][j]; } } return sum; }
Write a function that takes a string as an input and returns true if the string is a palindrome, false otherwise.	public boolean isPalindrome(String input) { String reversed = new StringBuilder(input).reverse().toString(); return input.equals(reversed); }
Write a Java function that takes two sorted arrays as input and merges them into a single sorted array.	public static int[] mergeSortedArrays(int[] arr1, int[] arr2) { int[] mergedArray = new int[arr1.length + arr2.length]; int i = 0, j = 0, k = 0; while (i < arr1.length && j < arr2.length) { if (arr1[i] < arr2[j]) { mergedArray[k++] = arr1[i++]; } else { mergedArray[k++] = arr2[j++]; } } while (i < arr1.length) { mergedArray[k++] = arr1[i++]; } while (j < arr2.length) { mergedArray[k++] = arr2[j++…
Write a Java function that takes a string as input and returns the number of occurrences of each word in the string.	import java.util.HashMap; import java.util.Map; public static Map<String, Integer> countWordOccurrences(String str) { Map<String, Integer> wordCounts = new HashMap<>(); String[] words = str.split("\\s+"); for (String word : words) { word = word.toLowerCase(); if (wordCounts.containsKey(word)) { wordCounts.put(word, wordCounts.get(word) + 1); } else { wordCounts.put(word, 1); } } return wordCounts…
Write a Java function that takes a string as input and returns the string with all non-alphanumeric characters removed.	public static String removeNonAlphanumericCharacters(String str) { StringBuilder result = new StringBuilder(); for (char c : str.toCharArray()) { if (Character.isLetterOrDigit(c)) { result.append(c); } } return result.toString(); }
Write a Java function that takes a 2D array as input and returns the maximum value in the array.	public static int findMaxValue(int[][] array) { int maxValue = array[0][0]; for (int i = 0; i < array.length; i++) { for (int j = 0; j < array[i].length; j++) { if (array[i][j] > maxValue) { maxValue = array[i][j]; } } } return maxValue; }
Write a Java function that takes a string as input and returns the string with all characters in uppercase.	public static String convertToUppercase(String str) { return str.toUpperCase(); }
Implement a Java function that takes a list of integers as input and returns the number of elements with values greater than 10.	```java public int countGreater(int[] nums) { int count = 0; for (int num : nums) { if (num > 10) { count++; } } return count; }
Write a Java function that takes a string as input and returns the string without any vowels.	```java public String removeVowels(String str) { String vowels = "aeiouAEIOU"; StringBuilder result = new StringBuilder(); for (char c : str.toCharArray()) { if (!vowels.indexOf(String.valueOf(c)) != -1) { result.append(c); } } return result.toString(); }
Implement a Java function that takes a list of strings as input and returns the longest string in the list.	```java public String getLongestString(String[] strs) { if (strs == null || strs.length == 0) { return null; } String longest = strs[0]; for (String str : strs) { if (str.length() > longest.length()) { longest = str; } } return longest; }
Write a Java function that takes a list of integers as input and returns the sum of all even numbers in the list.	```java public int sumEvenNumbers(int[] nums) { int sum = 0; for (int num : nums) { if (num % 2 == 0) { sum += num; } } return sum; }
Implement a Java function that takes a list of integers as input and returns the number of pairs with adjacent elements that have the same value.	```java public int countAdjacentPairs(int[] nums) { int count = 0; for (int i = 0; i < nums.length - 1; i++) { if (nums[i] == nums[i + 1]) { count++; } } return count; }
Write a function that calculates the average of all the odd numbers in a given list of integers.	```java public double averageOfOddNumbers(List<Integer> numbers) { int sum = 0; int count = 0; for (int number : numbers) { if (number % 2 != 0) { sum += number; count++; } } if (count == 0) { return 0; } return (double) sum / count; }
Write a function that finds the longest word in a given string.	```java public String longestWord(String sentence) { String[] words = sentence.split(" "); String longest = words[0]; for (int i = 1; i < words.length; i++) { if (words[i].length() > longest.length()) { longest = words[i]; } } return longest; }
Write a function that takes a list of strings as input and returns the count of the number of strings that have a length greater than 5.	```java public int countStringsGreaterThanFive(List<String> strings) { int count = 0; for (String str : strings) { if (str.length() > 5) { count++; } } return count; }
Create a function that takes a list of integers and returns the count of the number of times the number 7 appears in the list.	```java public int countSevens(List<Integer> numbers) { int count = 0; for (int number : numbers) { if (number == 7) { count++; } } return count; }
Write a function that takes a string as input and returns the string with all consonants removed.	```java public String removeConsonants(String sentence) { String consonants = "bcdfghjklmnpqrstvwxyz"; String newSentence = ""; for (char c : sentence.toLowerCase().toCharArray()) { if (c == ' ' || !consonants.contains(String.valueOf(c))) { newSentence += c; } } return newSentence; }
Write a Java function that takes a list of integers as input and returns the product of all the numbers in the list.	public static int productOfList(List<Integer> list) { int product = 1; for (int num : list) { product *= num; } return product; }
Create a Java function that takes a list of characters as input and returns true if all characters in the list are uppercase, false otherwise.	public static boolean isUppercase(List<Character> list) { for (char c : list) { if (!Character.isUpperCase(c)) { return false; } } return true; }
Write a Java function that takes a string as input and returns the string with all occurrences of a specified character removed.	public static String removeChar(String str, char c) { return str.replace(String.valueOf(c), ""); }
Create a Java function that takes a list of integers as input and returns the average of all the numbers in the list.	public static double averageOfList(List<Integer> list) { int sum = 0; for (int num : list) { sum += num; } return (double) sum / list.size(); }
Write a Java function that takes a list of strings as input and returns a new list with all strings in uppercase.	public static List<String> toUppercase(List<String> list) { List<String> upperCaseList = new ArrayList<>(); for (String str : list) { upperCaseList.add(str.toUpperCase()); } return upperCaseList; }
You are given a list of integers and you need to write a function that returns the count of the numbers that are greater than their next number in the list.	```java public int count GreaterNum(List<Integer> numbers) { int count = 0; for (int i = 0; i < numbers.size() - 1; i++) { if (numbers.get(i) > numbers.get(i + 1)) { count++; } } return count; }
Write a function that takes a string as input and returns true if it contains all the vowels ('a', 'e', 'i', 'o', 'u') at least once, false otherwise.	```java public boolean containsAllVowels(String s) { s = s.toLowerCase(); boolean hasA = false, hasE = false, hasI = false, hasO = false, hasU = false; for (char c : s.toCharArray()) { if (c == 'a') hasA = true; if (c == 'e') hasE = true; if (c == 'i') hasI = true; if (c == 'o') hasO = true; if (c == 'u') hasU = true; if (hasA && hasE && hasI && hasO && hasU) return true; } return false; }
A function takes a list of strings as input and returns the count of strings that have a length greater than 5.	```java public int countLongStrings(List<String> strings) { int count = 0; for (String s : strings) { if (s.length() > 5) { count++; } } return count; }
Given a list of integers, write a function that returns the count of prime numbers in the list.	```java public int countPrimeNumbers(List<Integer> numbers) { int count = 0; for (int num : numbers) { if (isPrime(num)) { count++; } } return count; } public boolean isPrime(int num) { if (num <= 1) return false; for (int i = 2; i * i <= num; i++) { if (num % i == 0) return false; } return true; }
You are given a string that contains a mix of uppercase and lowercase letters. Write a function that takes this string as input and returns a boolean value indicating whether the string contains the same number of uppercase and lowercase letters.	```java public boolean hasSameCaseLetters(String s) { int upperCaseCount = 0; int lowerCaseCount = 0; for (char c : s.toCharArray()) { if (Character.isUpperCase(c)) { upperCaseCount++; } else if (Character.isLowerCase(c)) { lowerCaseCount++; } } return upperCaseCount == lowerCaseCount; }
Write a Java function that takes a list of strings as input and returns a list of strings with the length of each string greater than 5.	public List<String> filterLongStrings(List<String> input) { List<String> result = new ArrayList<>(); for (String s : input) { if (s.length() > 5) { result.add(s); } } return result; }
Write a Java function that takes a list of integers as input and returns a boolean indicating whether the list is in ascending order.	public boolean isAscendingOrder(List<Integer> list) { for (int i = 0; i < list.size() - 1; i++) { if (list.get(i) > list.get(i + 1)) { return false; } } return true; }
Design a Java function that accepts a string as input and returns the count of vowels in the string.	public int countVowels(String str) { str = str.toLowerCase(); int count = 0; for (int i = 0; i < str.length(); i++) { char c = str.charAt(i); if (c == 'a' || c == 'e' || c == 'i' || c == 'o' || c == 'u') { count++; } } return count; }
Write a Java function that takes a list of strings as input and returns a list of strings where each string is in uppercase.	public List<String> convertToUppercase(List<String> list) { List<String> result = new ArrayList<>(); for (String str : list) { result.add(str.toUpperCase()); } return result; }
Design a Java function that takes a dictionary as input where the keys are strings and the values are integers. The function should return a new dictionary where the keys are the same, but the values are the squares of the original values.	public Map<String, Integer> squareValues(Map<String, Integer> map) { Map<String, Integer> result = new HashMap<>(); for (Map.Entry<String, Integer> entry : map.entrySet()) { result.put(entry.getKey(), entry.getValue() * entry.getValue()); } return result; }
Write a Java function that takes a string as input and returns a boolean indicating whether the string is a palindrome.	public boolean isPalindrome(String str) { String reversed = new StringBuilder(str).reverse().toString(); return str.equalsIgnoreCase(reversed); }
Write a Java program that takes a list of strings as input and returns the longest string in the list.	public String longestString(List<String> strings) { String longest = ""; for (String s : strings) { if (s.length() > longest.length()) { longest = s; } } return longest; }
You are given a list of integers. Write a Java function that returns the sum of all the even numbers in the list.	public int sumOfEvenNumbers(List<Integer> numbers) { int sum = 0; for (int num : numbers) { if (num % 2 == 0) { sum += num; } } return sum; }
Develop a Java function that takes a string as input and returns the number of uppercase letters in the string.	public int countUppercaseLetters(String str) { int count = 0; for (char c : str.toCharArray()) { if (Character.isUpperCase(c)) { count++; } } return count; }
Write a Java function that takes a list of lists of integers as input and returns the list with the maximum sum.	public List<Integer> listWithMaximumSum(List<List<Integer>> lists) { List<Integer> maxSumList = lists.get(0); int maxSum = 0; for (List<Integer> list : lists) { int sum = 0; for (int num : list) { sum += num; } if (sum > maxSum) { maxSum = sum; maxSumList = list; } } return maxSumList; }
You are given a dictionary where the keys are names of cities and the values are their corresponding populations. Write a Java function `find_city_with_largest_population` that takes this dictionary as an input and returns the name of the city with the largest population.	public String findCityWithLargestPopulation(Map<String, Integer> cityPopulations) { String cityWithLargestPopulation = ""; int maxPopulation = 0; for (Map.Entry<String, Integer> entry : cityPopulations.entrySet()) { if (entry.getValue() > maxPopulation) { maxPopulation = entry.getValue(); cityWithLargestPopulation = entry.getKey(); } } return cityWithLargestPopulation; }
Write a function to count the number of vowels in a given string.	```java public int countVowels(String str) { int count = 0; for (char c : str.toLowerCase().toCharArray()) { if (c == 'a' || c == 'e' || c == 'i' || c == 'o' || c == 'u') { count++; } } return count; }
Write a function to check if a given string is a palindrome.	```java public boolean isPalindrome(String str) { String reversed = new StringBuilder(str).reverse().toString(); return str.equalsIgnoreCase(reversed); }
Write a function that takes a list of integers as input and returns the second largest number in the list.	```java public int secondLargest(int[] arr) { int max = Integer.MIN_VALUE; int secondMax = Integer.MIN_VALUE; for (int num : arr) { if (num > max) { secondMax = max; max = num; } else if (num > secondMax && num != max) { secondMax = num; } } return secondMax; }
Write a function that takes a string as input and returns the string with all characters shifted by one position to the right.	```java public String shiftCharacters(String str) { StringBuilder result = new StringBuilder(); for (char c : str.toCharArray()) { if (c == 'z' || c == 'Z') { result.append(c == 'z' ? 'a' : 'A'); } else { result.append((char) (c + 1)); } } return result.toString(); }
Write a function that takes a list of strings as input and returns the string that occurs most frequently.	```java public String mostFrequentString(String[] arr) { Map<String, Integer> freqMap = new HashMap<>(); for (String str : arr) { freqMap.put(str, freqMap.getOrDefault(str, 0) + 1); } String mostFrequent = ""; int maxCount = 0; for (Map.Entry<String, Integer> entry : freqMap.entrySet()) { if (entry.getValue() > maxCount) { maxCount = entry.getValue(); mostFrequent = entry.getKey(); } } return mos…
Write a function to count the number of times each word appears in a given string.	```java import java.util.HashMap; import java.util.Map; public class WordCounter { public static Map<String, Integer> countWords(String str) { Map<String, Integer> wordCount = new HashMap<>(); String[] words = str.split(" "); for (String word : words) { if(wordCount.containsKey(word)) { wordCount.put(word, wordCount.get(word) + 1); } else { wordCount.put(word, 1); } } return wordCount; } }
Write a function to find the first duplicate in an array of integers.	```java import java.util.HashSet; public class FirstDuplicate { public static Integer findFirstDuplicate(int[] nums) { HashSet<Integer> numsSet = new HashSet<>(); for (int num : nums) { if(numsSet.contains(num)) { return num; } else { numsSet.add(num); } } return null; } }
Write a function to find the minimum number of jumps required to reach the last index from the first index in an array of integers, where each element represents the maximum jump size.	```java public class MinJumps { public static int minJumps(int[] nums) { int jumps = 0, currentEnd = 0, farthest = 0; for (int i = 0; i < nums.length - 1; i++) { farthest = Math.max(farthest, i + nums[i]); if (i == currentEnd) { jumps++; currentEnd = farthest; } } return jumps; } }
Write a function to find the longest common prefix in an array of strings.	```java public class LongestCommonPrefix { public static String longestCommonPrefix(String[] strs) { if (strs == null || strs.length == 0) { return ""; } String prefix = strs[0]; for (int i = 1; i < strs.length; i++) { while (strs[i].indexOf(prefix) != 0) { prefix = prefix.substring(0, prefix.length() - 1); if (prefix.isEmpty()) { return ""; } } } return prefix; } }
Write a function to find the middle node of a singly linked list.	```java public class MiddleNode { public static Node middleNode(Node head) { Node slow = head, fast = head; while (fast != null && fast.next != null) { slow = slow.next; fast = fast.next.next; } return slow; } }
Write a function that takes in a list of integers and returns the count of all prime numbers in the list.	public int countPrimes(List<Integer> numbers) { int count = 0; for (int number : numbers) { if (isPrime(number)) { count++; } } return count; }
Create a program that takes a list of strings as input and returns the string with the maximum length.	public String findLongestString(List<String> strings) { String longestString = ""; for (String str : strings) { if (str.length() > longestString.length()) { longestString = str; } } return longestString; }
Write a function that takes in a list of integers and returns the average of all odd numbers in the list.	public double averageOfOdds(List<Integer> numbers) { int sum = 0; int count = 0; for (int number : numbers) { if (number % 2 != 0) { sum += number; count++; } } if (count == 0) { return 0; } else { return (double) sum / count; } }
Write a function that takes in a list of strings as input and returns the count of all strings that start with a vowel.	public int countVowelStartingStrings(List<String> strings) { int count = 0; for (String str : strings) { String firstLetter = str.substring(0, 1); if (firstLetter.equalsIgnoreCase("a") || firstLetter.equalsIgnoreCase("e") || firstLetter.equalsIgnoreCase("i") || firstLetter.equalsIgnoreCase("o") || firstLetter.equalsIgnoreCase("u")) { count++; } } return count; }
Create a program that takes a list of integers as input and returns the maximum difference between any two elements in the list.	public int maxDifference(List<Integer> numbers) { int max = numbers.get(0); int min = numbers.get(0); for (int number : numbers) { if (number > max) { max = number; } if (number < min) { min = number; } } return max - min; }
Write a function to count the number of vowels in a given string.	```java public int countVowels(String str) { int count = 0; for (int i = 0; i < str.length(); i++) { char c = str.charAt(i); if (c == 'a' || c == 'e' || c == 'i' || c == 'o' || c == 'u' || c == 'A' || c == 'E' || c == 'I' || c == 'O' || c == 'U') { count++; } } return count; }
Create a function to check if a given number is a prime number or not.	```java public boolean isPrime(int num) { if (num <= 1) { return false; } for (int i = 2; i * i <= num; i++) { if (num % i == 0) { return false; } } return true; }
Write a function to find the maximum value in a two-dimensional array.	```java public int findMaxValue(int[][] arr) { int max = arr[0][0]; for (int i = 0; i < arr.length; i++) { for (int j = 0; j < arr[i].length; j++) { if (arr[i][j] > max) { max = arr[i][j]; } } } return max; }
Create a function to find the first duplicate in a given array of integers.	```java public int findFirstDuplicate(int[] arr) { for (int i = 0; i < arr.length; i++) { for (int j = i + 1; j < arr.length; j++) { if (arr[i] == arr[j]) { return arr[i]; } } } return -1; // return -1 if no duplicate found }
Write a function to reverse a given string.	```java public String reverseString(String str) { StringBuilder reversed = new StringBuilder(); for (int i = str.length() - 1; i >= 0; i--) { reversed.append(str.charAt(i)); } return reversed.toString(); }
Write a function that takes a string as an input and returns the string with all vowels removed.	public String removeVowels(String str) { String newStr = ""; for(int i = 0; i < str.length(); i++) { char c = str.charAt(i); if(c != 'a' && c != 'e' && c != 'i' && c != 'o' && c != 'u' && c != 'A' && c != 'E' && c != 'I' && c != 'O' && c != 'U') { newStr += c; } } return newStr; }
Create a function that takes a list of integers as input and returns a new list with all even numbers removed.	public List<Integer> removeEvenNumbers(List<Integer> numbers) { List<Integer> newList = new ArrayList<>(); for(int num : numbers) { if(num % 2 != 0) { newList.add(num); } } return newList; }
Write a function that takes a string as an input and returns true if the string is a palindrome, false otherwise.	public boolean isPalindrome(String str) { String reversed = new StringBuilder(str).reverse().toString(); return str.equals(reversed); }
Implement a function that takes a list of integers as input and returns the sum of all prime numbers in the list.	public int sumOfPrimeNumbers(List<Integer> numbers) { int sum = 0; for(int num : numbers) { if(isPrime(num)) { sum += num; } } return sum; } public boolean isPrime(int num) { if(num <= 1) { return false; } for(int i = 2; i < num; i++) { if(num % i == 0) { return false; } } return true; }
Create a function that takes a list of strings as input and returns a new list with all strings in uppercase.	public List<String> convertToStringUpperCase(List<String> strings) { List<String> newList = new ArrayList<>(); for(String str : strings) { newList.add(str.toUpperCase()); } return newList; }
Write a function to count the total number of vowels in a given string.	```java public static int countVowels(String str) { int count = 0; for (int i = 0; i < str.length(); i++) { char ch = str.charAt(i); if (ch == 'a' || ch == 'e' || ch == 'i' || ch == 'o' || ch == 'u' || ch == 'A' || ch == 'E' || ch == 'I' || ch == 'O' || ch == 'U') { count++; } } return count; }
You are given a list of strings. Write a Java function to find the longest string in the list.	```java public static String findLongestString(String[] strs) { if (strs == null || strs.length == 0) { return ""; } String longestStr = strs[0]; for (int i = 1; i < strs.length; i++) { if (strs[i].length() > longestStr.length()) { longestStr = strs[i]; } } return longestStr; }
Create a function to convert a given string from camel case to snake case.	```java public static String camelToSnake(String str) { StringBuilder sb = new StringBuilder(); for (int i = 0; i < str.length(); i++) { char ch = str.charAt(i); if (Character.isUpperCase(ch)) { sb.append("_").append(Character.toLowerCase(ch)); } else { sb.append(ch); } } return sb.toString(); }
You are given an array of integers. Write a Java function to find the maximum difference between any two elements in the array.	```java public static int findMaxDifference(int[] arr) { if (arr == null || arr.length < 2) { return 0; } int min = arr[0]; int maxDiff = arr[1] - arr[0]; for (int i = 1; i < arr.length; i++) { if (arr[i] - min > maxDiff) { maxDiff = arr[i] - min; } if (arr[i] < min) { min = arr[i]; } } return maxDiff; }
Write a function to find the middle element of a given array.	```java public static int findMiddleElement(int[] arr) { if (arr == null || arr.length == 0) { return -1; } if (arr.length % 2 == 0) { return -1; // or throw an exception if you want } return arr[arr.length / 2]; }
Create a Java function that takes in two lists of integers and returns true if they contain the same elements, regardless of order.	```java public boolean sameElements(int[] list1, int[] list2) { if (list1.length != list2.length) { return false; } Arrays.sort(list1); Arrays.sort(list2); return Arrays.equals(list1, list2); }
You are given a list of strings and you need to write a Java function that returns the string with the maximum length.	```java public String longestString(String[] strings) { if (strings == null || strings.length == 0) { return null; } String longest = strings[0]; for (String s : strings) { if (s.length() > longest.length()) { longest = s; } } return longest; }
Create a Java function that takes in a list of integers and returns the count of numbers that are multiples of 3 or 5.	```java public int countMultiples(int[] numbers) { int count = 0; for (int number : numbers) { if (number % 3 == 0 || number % 5 == 0) { count++; } } return count; }
Write a Java function that takes in a string and returns true if it is a palindrome, false otherwise.	```java public boolean isPalindrome(String s) { int left = 0; int right = s.length() - 1; while (left < right) { if (s.charAt(left) != s.charAt(right)) { return false; } left++; right--; } return true; }
You are given a list of integers representing exam scores and you need to write a Java function that returns the average score, rounded down to the nearest whole number.	```java public int averageScore(int[] scores) { int sum = 0; for (int score : scores) { sum += score; } return sum / scores.length; }
Write a Java function that takes a string as an argument and returns the string in uppercase.	```java public String toUpperCase(String str) { return str.toUpperCase(); }
Write a Java function to check whether the given year is a leap year or not.	```java public boolean isLeapYear(int year) { if (year % 4 == 0) { if (year % 100 == 0) { if (year % 400 == 0) { return true; } else { return false; } } else { return true; } } else { return false; } }
Write a Java function that takes a list of integers as input and returns the count of all prime numbers in the list.	```java public int countPrimes(List<Integer> numbers) { int count = 0; for (int num : numbers) { if (isPrime(num)) { count++; } } return count; } public boolean isPrime(int num) { if (num <= 1) { return false; } for (int i = 2; i * i <= num; i++) { if (num % i == 0) { return false; } } return true; }
Write a Java function that takes a list of strings as input and returns the list sorted in descending order of string lengths.	```java public List<String> sortStringsByLength(List<String> strings) { strings.sort((str1, str2) -> str2.length() - str1.length()); return strings; }
Write a Java function that takes an integer as input and returns the sum of its digits.	```java public int sumOfDigits(int num) { int sum = 0; while (num != 0) { sum += num % 10; num /= 10; } return sum; }
Write a Java function that takes a list of strings as input and returns the length of the longest string in the list.	```java public int maxLength(String[] list) { int maxLength = 0; for (String str : list) { if (str.length() > maxLength) { maxLength = str.length(); } } return maxLength; } ```
Write a Java function that takes a list of integers as input and returns the average of all the numbers in the list, rounded to two decimal places.	```java public double calculateAverage(int[] list) { int sum = 0; for (int num : list) { sum += num; } return Math.round((double) sum / list.length * 100.0) / 100.0; } ```
Write a Java function that takes a string as input and returns the string in reverse order.	```java public String reverseString(String str) { String reversed = ""; for (int i = str.length() - 1; i >= 0; i--) { reversed += str.charAt(i); } return reversed; } ```
Write a Java function that takes a list of integers as input and returns true if the list contains at least one even number, false otherwise.	```java public boolean hasEvenNumber(int[] list) { for (int num : list) { if (num % 2 == 0) { return true; } } return false; } ```
Write a Java function that takes a list of strings as input and returns a new list that contains only the strings that start with the letter "A".	```java public String[] filterStrings(String[] list) { List<String> newList = new ArrayList<>(); for (String str : list) { if (str.startsWith("A")) { newList.add(str); } } return newList.toArray(new String[0]); } ```
Write a Java function that takes a list of integers as input and returns the average value of the list.	```java public class Main { public static double averageList(List<Integer> list) { int sum = 0; for (int num : list) { sum += num; } return (double) sum / list.size(); } public static void main(String[] args) { List<Integer> list = Arrays.asList(1, 2, 3, 4, 5); System.out.println(averageList(list)); } }
Create a Java function called 'count_chars' that takes a string input ('str') as an argument and returns the count of characters in the string.	```java public class Main { public static int count_chars(String str) { return str.length(); } public static void main(String[] args) { String str = "Hello World"; System.out.println(count_chars(str)); } }
Write a Java function that takes a set of integers as input and returns a new set with only the integers that are multiples of 3.	```java import java.util.Set; import java.util.HashSet; public class Main { public static Set<Integer> multiplesOfThree(Set<Integer> set) { Set<Integer> result = new HashSet<>(); for (int num : set) { if (num % 3 == 0) { result.add(num); } } return result; } public static void main(String[] args) { Set<Integer> set = new HashSet<>(Arrays.asList(1, 2, 3, 4, 5, 6, 7, 8, 9)); System.out.println(mult…
Write a Java function that takes a string as input and returns True if the string is a palindrome, otherwise returns False.	```java public class Main { public static boolean isPalindrome(String str) { String reversed = new StringBuilder(str).reverse().toString(); return str.equals(reversed); } public static void main(String[] args) { String str = "madam"; System.out.println(isPalindrome(str)); } }
Create a Java function called 'max_value' that takes a list of integers as input and returns the maximum value in the list.	```java import java.util.List; public class Main { public static int maxValue(List<Integer> list) { int max = list.get(0); for (int num : list) { if (num > max) { max = num; } } return max; } public static void main(String[] args) { List<Integer> list = Arrays.asList(1, 2, 3, 4, 5); System.out.println(maxValue(list)); } }
Write a Java method to count the number of vowels in a given string.	public int countVowels(String str) { int count = 0; for (int i = 0; i < str.length(); i++) { char c = str.charAt(i); if (c == 'a' || c == 'e' || c == 'i' || c == 'o' || c == 'u' || c == 'A' || c == 'E' || c == 'I' || c == 'O' || c == 'U') { count++; } } return count; }
Write a Java method to find the index of the first occurrence of a given character in a string.	public int findCharIndex(String str, char c) { for (int i = 0; i < str.length(); i++) { if (str.charAt(i) == c) { return i; } } return -1; }
Write a Java method to find the union of two arrays.	import java.util.*; public int[] union(int[] arr1, int[] arr2) { Set<Integer> set = new HashSet<>(); for (int i : arr1) { set.add(i); } for (int i : arr2) { set.add(i); } int[] unionArr = new int[set.size()]; int i = 0; for (int num : set) { unionArr[i++] = num; } return unionArr; }
Write a Java method to rotate an array by a given number of positions.	public void rotateArray(int[] arr, int positions) { positions = positions % arr.length; reverseArray(arr, 0, arr.length - 1); reverseArray(arr, 0, positions - 1); reverseArray(arr, positions, arr.length - 1); } private void reverseArray(int[] arr, int start, int end) { while (start < end) { int temp = arr[start]; arr[start] = arr[end]; arr[end] = temp; start++; end--; } }
Write a Java method to calculate the factorial of a given number.	public long factorial(int n) { long factorial = 1; for (int i = 1; i <= n; i++) { factorial *= i; } return factorial; }
You are given a string that contains multiple occurrences of a certain substring. Write a function that takes this string and the substring as arguments and returns the frequency of the substring in the string.	public int substringFrequency(String mainString, String subString) { int count = 0; int index = 0; while ((index = mainString.indexOf(subString, index)) != -1) { count++; index += subString.length(); } return count; }
Write a function that takes a list of strings as input and returns the string with the minimum length.	public String minStringLength(List<String> strings) { String minString = strings.get(0); for (String str : strings) { if (str.length() < minString.length()) { minString = str; } } return minString; }
You are given a set of intervals where each interval is represented as a pair of integers. Write a function that takes these intervals as input and returns the total number of intervals that overlap with each other.	public int countOverlappingIntervals(List<int[]> intervals) { int count = 0; for (int i = 0; i < intervals.size(); i++) { for (int j = i + 1; j < intervals.size(); j++) { if (intervals.get(i)[0] <= intervals.get(j)[1] && intervals.get(j)[0] <= intervals.get(i)[1]) { count++; } } } return count; }
Write a function that takes a list of integers as input and returns a new list that contains the elements in descending order.	public List<Integer> sortDescending(List<Integer> numbers) { List<Integer> sortedNumbers = new ArrayList<>(numbers); Collections.sort(sortedNumbers, Collections.reverseOrder()); return sortedNumbers; }
You are given a list of strings where each string represents a word. Write a function that takes this list of words as input and returns the word that appears most frequently.	public String mostFrequentWord(List<String> words) { Map<String, Integer> wordFrequency = new HashMap<>(); for (String word : words) { wordFrequency.put(word, wordFrequency.getOrDefault(word, 0) + 1); } String maxFrequencyWord = null; int maxFrequency = 0; for (Map.Entry<String, Integer> entry : wordFrequency.entrySet()) { if (entry.getValue() > maxFrequency) { maxFrequency = entry.getValue(); ma…
Write a function that takes a string as input and returns true if the string is a palindrome, false otherwise.	public boolean isPalindrome(String str) { String reversed = new StringBuilder(str).reverse().toString(); return str.equals(reversed); }
Write a function that takes an array of integers as input and returns the array sorted in ascending order.	import java.util.Arrays; public int[] sortArray(int[] arr) { Arrays.sort(arr); return arr; }
Write a function that takes a string as input and returns the number of words in the string.	public int countWords(String str) { String[] words = str.split(" "); return words.length; }
Write a function that takes an integer as input and returns the count of factors for that integer.	public int countFactors(int n) { int count = 0; for (int i = 1; i <= n; i++) { if (n % i == 0) { count++; } } return count; }
Write a function that takes an array of integers as input and returns the maximum sum of a contiguous subarray within the one-dimensional array of numbers.	public int maxSubArraySum(int[] arr) { int maxSoFar = arr[0]; int maxEndingHere = arr[0]; for (int i = 1; i < arr.length; i++) { maxEndingHere = Math.max(arr[i], maxEndingHere + arr[i]); maxSoFar = Math.max(maxSoFar, maxEndingHere); } return maxSoFar; }
Write a Java function that takes an integer as argument and returns true if the number is a palindrome, and false otherwise.	```java public boolean isPalindrome(int num) { int reversedNum = 0; int originalNum = num; while (num != 0) { int digit = num % 10; reversedNum = reversedNum * 10 + digit; num /= 10; } return originalNum == reversedNum; }
Write a Java function that takes a string as input and returns the number of vowels in the string.	```java public int countVowels(String str) { int count = 0; for (char c : str.toLowerCase().toCharArray()) { if (c == 'a' || c == 'e' || c == 'i' || c == 'o' || c == 'u') { count++; } } return count; }
Write a Java function that takes an array of integers as input and returns the second largest number in the array.	```java public int secondLargest(int[] arr) { int max = Integer.MIN_VALUE; int secondMax = Integer.MIN_VALUE; for (int num : arr) { if (num > max) { secondMax = max; max = num; } else if (num > secondMax && num != max) { secondMax = num; } } return secondMax; }
Write a Java function that takes a string as input and returns the string with all the characters in uppercase.	```java public String toUpperCase(String str) { return str.toUpperCase(); }
Write a Java function that takes an integer as input and returns the factorial of the number.	```java public long factorial(int n) { long result = 1; for (int i = 1; i <= n; i++) { result *= i; } return result; }
Write a function that takes a string as input and returns the string with all non-alphabet letters removed.	public String removeNonAlphabets(String str) { StringBuilder sb = new StringBuilder(); for(int i = 0; i < str.length(); i++) { char ch = str.charAt(i); if(Character.isLetter(ch)) { sb.append(ch); } } return sb.toString(); }
Write a function to check if a given string contains any duplicate characters.	public boolean hasDuplicates(String str) { int[] freq = new int[256]; for(int i = 0; i < str.length(); i++) { char ch = str.charAt(i); freq[ch]++; } for(int i = 0; i < 256; i++) { if(freq[i] > 1) { return true; } } return false; }
Write a function that takes a string as input and returns the number of uppercase letters in the string.	public int countUppercase(String str) { int count = 0; for(int i = 0; i < str.length(); i++) { char ch = str.charAt(i); if(Character.isUpperCase(ch)) { count++; } } return count; }
Write a function that takes a string as input and returns the string in reverse order.	public String reverseString(String str) { StringBuilder sb = new StringBuilder(str); return sb.reverse().toString(); }
Write a function that takes a string as input and returns the string with the first character of each word capitalized.	public String capitalizeFirstLetter(String str) { String[] words = str.split(" "); StringBuilder sb = new StringBuilder(); for(String word : words) { if(word.length() > 0) { sb.append(Character.toUpperCase(word.charAt(0))); sb.append(word.substring(1)); sb.append(" "); } } return sb.toString().trim(); }
Create a Java program that takes an integer as input and returns the sum of all its digits.	public static int sumOfDigits(int num) { int sum = 0; while (num > 0) { sum += num % 10; num = num / 10; } return sum; }
Write a Java function to check if a given string is a palindrome or not.	public static boolean isPalindrome(String str) { String reversedStr = new StringBuilder(str).reverse().toString(); return str.equals(reversedStr); }
Create a Java program that takes a list of integers as input and returns the number of even numbers in the list.	public static int countEvenNumbers(int[] numbers) { int count = 0; for (int number : numbers) { if (number % 2 == 0) { count++; } } return count; }
Write a Java function to convert a given temperature from Celsius to Fahrenheit.	public static double celsiusToFahrenheit(double celsius) { return (celsius * 9 / 5) + 32; }
Create a Java program that takes a string as input and returns the string with all consonants converted to uppercase.	public static String convertConsonantsToUppercase(String str) { StringBuilder result = new StringBuilder(); for (char c : str.toCharArray()) { if (c != 'a' && c != 'e' && c != 'i' && c != 'o' && c != 'u' && c != 'A' && c != 'E' && c != 'I' && c != 'O' && c != 'U' && Character.isLetter(c)) { result.append(Character.toUpperCase(c)); } else { result.append(c); } } return result.toString(); }
Write a function to find the longest word in a given string.	public static String findLongestWord(String str) { String[] words = str.split(" "); String longestWord = ""; for (String word: words) { if (word.length() > longestWord.length()) { longestWord = word; } } return longestWord; }
Create a function that takes a list of integers as input and returns the product of all the even numbers in the list.	public static int productOfEvenNumbers(List<Integer> numbers) { int product = 1; for (int number: numbers) { if (number % 2 == 0) { product *= number; } } return product; }
Write a function that takes a string as input and returns the string with all vowels removed.	public static String removeVowels(String str) { StringBuilder result = new StringBuilder(); for (char c: str.toCharArray()) { if (!isVowel(c)) { result.append(c); } } return result.toString(); } public static boolean isVowel(char c) { c = Character.toUpperCase(c); return c == 'A' || c == 'E' || c == 'I' || c == 'O' || c == 'U'; }
Create a function that takes a 2D array as input and returns the sum of all the elements in the diagonal.	public static int sumOfDiagonal(int[][] array) { int sum = 0; for (int i = 0; i < array.length; i++) { sum += array[i][i]; } return sum; }
Write a function that takes a string as input and returns true if the string contains at least two identical characters, false otherwise.	public static boolean hasIdenticalCharacters(String str) { Set<Character> characters = new HashSet<>(); for (char c: str.toCharArray()) { if (!characters.add(c)) { return true; } } return false; }
Write a Java function to take a list of strings as input, remove duplicates, and return the list in reverse order.	``` import java.util.*; public class Main { public static List<String> removeDuplicatesAndReverse(List<String> input) { List<String> uniqueList = new ArrayList<>(new LinkedHashSet<>(input)); Collections.reverse(uniqueList); return uniqueList; } public static void main(String[] args) { List<String> input = Arrays.asList("apple", "banana", "apple", "orange", "banana"); System.out.println(removeDupl…
Create a Java function that takes a string as input and returns the string with all vowels removed.	``` public class Main { public static String removeVowels(String input) { return input.replaceAll("[aeiouAEIOU]", ""); } public static void main(String[] args) { String input = "Hello World"; System.out.println(removeVowels(input)); } }
Write a Java function that takes a list of integers as input and returns the sum of all even numbers.	``` public class Main { public static int sumOfEvenNumbers(List<Integer> input) { return input.stream().filter(n -> n % 2 == 0).mapToInt(Integer::intValue).sum(); } public static void main(String[] args) { List<Integer> input = Arrays.asList(1, 2, 3, 4, 5, 6); System.out.println(sumOfEvenNumbers(input)); } }
Create a Java function that takes a string as input and returns the string with the words in reverse order.	``` public class Main { public static String reverseWords(String input) { String[] words = input.split(" "); StringBuilder reversed = new StringBuilder(); for (int i = words.length - 1; i >= 0; i--) { reversed.append(words[i]).append(" "); } return reversed.toString().trim(); } public static void main(String[] args) { String input = "Hello World"; System.out.println(reverseWords(input)); } }
Write a Java function that takes a list of integers as input and returns the product of all numbers.	``` public class Main { public static int productOfNumbers(List<Integer> input) { int product = 1; for (int num : input) { product *= num; } return product; } public static void main(String[] args) { List<Integer> input = Arrays.asList(1, 2, 3, 4, 5); System.out.println(productOfNumbers(input)); } }
Develop a Java function that takes an integer as input and returns the sum of its digits.	public static int sumOfDigits(int num) { int sum = 0; while (num != 0) { sum += num % 10; num /= 10; } return sum; }
You are given a list of integers and a target sum. Write a function to find all pairs of integers in the list that add up to the target sum.	public static List<int[]> findPairs(int[] nums, int target) { List<int[]> pairs = new ArrayList<>(); Map<Integer, Integer> map = new HashMap<>(); for (int i = 0; i < nums.length; i++) { int complement = target - nums[i]; if (map.containsKey(complement)) { pairs.add(new int[]{complement, nums[i]}); } map.put(nums[i], i); } return pairs; }
Implement a Java function that takes a string as input and returns the string with all vowels removed.	public static String removeVowels(String s) { StringBuilder result = new StringBuilder(); for (char c : s.toCharArray()) { if (!isVowel(c)) { result.append(c); } } return result.toString(); } public static boolean isVowel(char c) { c = Character.toLowerCase(c); return c == 'a' || c == 'e' || c == 'i' || c == 'o' || c == 'u'; }
You are given a 2D array of integers. Write a function to find the maximum element in the 2D array.	public static int findMax(int[][] arr) { int max = Integer.MIN_VALUE; for (int[] row : arr) { for (int num : row) { max = Math.max(max, num); } } return max; }
Develop a Java function that takes a list of strings as input and returns the string with the least number of characters.	public static String shortestString(String[] strs) { String shortest = strs[0]; for (String str : strs) { if (str.length() < shortest.length()) { shortest = str; } } return shortest; }
Write a Java function that takes a list of strings as input and returns the string that has the maximum length. If there are multiple strings with the maximum length, return the first one.	public static String maxLengthString(List<String> strings) { if (strings.isEmpty()) { return ""; } String maxLengthStr = strings.get(0); for (String str : strings) { if (str.length() > maxLengthStr.length()) { maxLengthStr = str; } } return maxLengthStr; }
Write a Java function that takes a list of integers as input and returns the count of even numbers in the list.	public static int countEvenNumbers(List<Integer> numbers) { int count = 0; for (int num : numbers) { if (num % 2 == 0) { count++; } } return count; }
Write a Java function that takes a string as input and returns true if the string is a palindrome, false otherwise.	public static boolean isPalindrome(String str) { int start = 0; int end = str.length() - 1; while (start < end) { if (str.charAt(start) != str.charAt(end)) { return false; } start++; end--; } return true; }
Write a Java function that takes a list of integers as input and returns the second smallest number in the list. If the list has less than two elements, return -1.	public static int secondSmallestNumber(List<Integer> numbers) { if (numbers.size() < 2) { return -1; } Collections.sort(numbers); return numbers.get(1); }
Write a Java function that takes two strings as input and returns true if the second string is a substring of the first string, false otherwise.	public static boolean isSubstring(String str1, String str2) { return str1.contains(str2); }
Write a Java function to find the sum of even numbers in an array.	public class Main { public static int sumOfEvens(int[] arr) { int sum = 0; for (int i = 0; i < arr.length; i++) { if (arr[i] % 2 == 0) { sum += arr[i]; } } return sum; } public static void main(String[] args) { int[] arr = {1, 2, 3, 4, 5, 6}; System.out.println(sumOfEvens(arr)); } }
Implement a Java function called is_prime that takes an integer as input and returns true if the number is prime, false otherwise.	public class Main { public static boolean isPrime(int num) { if (num <= 1) { return false; } for (int i = 2; i <= Math.sqrt(num); i++) { if (num % i == 0) { return false; } } return true; } public static void main(String[] args) { System.out.println(isPrime(11)); // true System.out.println(isPrime(15)); // false } }
Write a Java function to convert a given binary string to its decimal equivalent.	public class Main { public static int binaryToDecimal(String binary) { int decimal = 0; int power = 0; for (int i = binary.length() - 1; i >= 0; i--) { decimal += (binary.charAt(i) - '0') * Math.pow(2, power); power++; } return decimal; } public static void main(String[] args) { System.out.println(binaryToDecimal("1010")); // 10 } }
Create a Java function that takes a string as input and returns true if the string is a palindrome, false otherwise.	public class Main { public static boolean isPalindrome(String str) { int left = 0; int right = str.length() - 1; while (left < right) { if (str.charAt(left) != str.charAt(right)) { return false; } left++; right--; } return true; } public static void main(String[] args) { System.out.println(isPalindrome("madam")); // true System.out.println(isPalindrome("hello")); // false } }
Write a Java function to find the intersection of two arrays.	public class Main { public static int[] intersection(int[] arr1, int[] arr2) { int[] intersect = new int[Math.min(arr1.length, arr2.length)]; int index = 0; for (int i = 0; i < arr1.length; i++) { for (int j = 0; j < arr2.length; j++) { if (arr1[i] == arr2[j]) { intersect[index++] = arr1[i]; break; } } } int[] result = new int[index]; System.arraycopy(intersect, 0, result, 0, index); return resul…
Write a function to count the number of vowels in a given string, ignoring case sensitivity.	public int countVowels(String str) { str = str.toLowerCase(); int count = 0; for (int i = 0; i < str.length(); i++) { char c = str.charAt(i); if (c == 'a' || c == 'e' || c == 'i' || c == 'o' || c == 'u') { count++; } } return count; }
Write a function that takes a list of integers as an input and returns the second smallest number in the list.	public int secondSmallest(List<Integer> list) { if (list.size() < 2) { return -1; // or throw an exception } Collections.sort(list); return list.get(1); }
Given a list of strings, write a function that returns the total number of characters in all strings.	public int totalCharacters(List<String> list) { int total = 0; for (String str : list) { total += str.length(); } return total; }
Implement a function to check if a given string contains at least one digit.	public boolean hasDigit(String str) { for (int i = 0; i < str.length(); i++) { char c = str.charAt(i); if (Character.isDigit(c)) { return true; } } return false; }
Write a function that takes a string as an input and returns the string with all duplicates removed, preserving the original order of characters.	public String removeDuplicates(String str) { String result = ""; for (int i = 0; i < str.length(); i++) { char c = str.charAt(i); if (!result.contains(String.valueOf(c))) { result += c; } } return result; }
Write a Java function to check if a given integer is a power of 2.	public class Main { public static boolean isPowerOfTwo(int n) { if (n <= 0) { return false; } return (n & (n - 1)) == 0; } public static void main(String[] args) { System.out.println(isPowerOfTwo(8)); // true System.out.println(isPowerOfTwo(10)); // false } }
Write a Java function to find the maximum frequency of a character in a given string.	public class Main { public static char maxFrequencyChar(String str) { int[] freq = new int[256]; for (int i = 0; i < str.length(); i++) { freq[str.charAt(i)]++; } int max = 0; char maxChar = ' '; for (int i = 0; i < 256; i++) { if (freq[i] > max) { max = freq[i]; maxChar = (char) i; } } return maxChar; } public static void main(String[] args) { System.out.println(maxFrequencyChar("apple")); // 'p…
Write a Java function to find the longest common prefix among a list of strings.	public class Main { public static String longestCommonPrefix(String[] strs) { if (strs == null || strs.length == 0) { return ""; } String prefix = strs[0]; for (int i = 1; i < strs.length; i++) { while (strs[i].indexOf(prefix) != 0) { prefix = prefix.substring(0, prefix.length() - 1); if (prefix.isEmpty()) { return ""; } } } return prefix; } public static void main(String[] args) { String[] strs …
Write a Java function to reverse a given linked list.	public class Main { static class Node { int data; Node next; Node(int d) { data = d; next = null; } } public static Node reverseList(Node head) { Node prev = null; Node curr = head; Node next = null; while (curr != null) { next = curr.next; curr.next = prev; prev = curr; curr = next; } return prev; } public static void printList(Node node) { while (node != null) { System.out.print(node.data + " "…
Write a Java function to find the first non-repeating character in a given string.	public class Main { public static char firstNonRepeatingChar(String str) { int[] freq = new int[256]; for (int i = 0; i < str.length(); i++) { freq[str.charAt(i)]++; } for (int i = 0; i < str.length(); i++) { if (freq[str.charAt(i)] == 1) { return str.charAt(i); } } return '$'; // return a special character if no non-repeating character is found } public static void main(String[] args) { System.o…
Write a function that takes a list of strings as input and returns the count of strings that have more than three characters.	public int countLongStrings(List<String> strings) { int count = 0; for (String str : strings) { if (str.length() > 3) { count++; } } return count; }
Develop a Java function to reverse a given string.	public String reverseString(String str) { StringBuilder reversed = new StringBuilder(str); return reversed.reverse().toString(); }
Write a function that takes a list of integers as input and returns true if the list contains at least one even number, false otherwise.	public boolean hasEvenNumber(List<Integer> numbers) { for (int num : numbers) { if (num % 2 == 0) { return true; } } return false; }
Create a Java function that takes a list of strings as input and returns a new list containing only the strings that start with a vowel.	public List<String> filterVowelStrings(List<String> strings) { List<String> vowelStrings = new ArrayList<>(); for (String str : strings) { if (str != null && str.length() > 0 && "aeiouAEIOU".indexOf(str.charAt(0)) != -1) { vowelStrings.add(str); } } return vowelStrings; }
Write a function that takes a list of integers as input and returns the product of all the numbers in the list.	public int productNumbers(List<Integer> numbers) { int product = 1; for (int num : numbers) { product *= num; } return product; }
Write a function that takes a string as input and returns the string with all even index characters removed.	```java public static String removeEvenIndexCharacters(String str) { StringBuilder result = new StringBuilder(); for (int i = 0; i < str.length(); i++) { if (i % 2 != 0) { result.append(str.charAt(i)); } } return result.toString(); }
Write a function that takes a list of integers as input and returns the maximum difference between any two elements in the list.	```java public static int maxDifference(int[] list) { int max = list[0]; int min = list[0]; for (int i = 1; i < list.length; i++) { if (list[i] > max) { max = list[i]; } if (list[i] < min) { min = list[i]; } } return max - min; }
Create a Java function that takes a dictionary as input and returns a new dictionary where the keys are the keys from the original dictionary, and the values are the length of the corresponding values from the original dictionary.	```java import java.util.HashMap; import java.util.Map; public static Map<String, Integer> valueLengths(Map<String, String> dict) { Map<String, Integer> result = new HashMap<>(); for (Map.Entry<String, String> entry : dict.entrySet()) { result.put(entry.getKey(), entry.getValue().length()); } return result; }
Write a function that takes a list of strings as input and returns a new list containing only the strings that start with a vowel.	```java public static List<String> stringsStartingWithVowel(List<String> list) { List<String> result = new ArrayList<>(); for (String str : list) { if (str.matches("^[aeiouAEIOU].*")) { result.add(str); } } return result; }
Create a Java function that takes an integer n as input and returns the count of numbers between 1 and n (inclusive) that are divisible by 3 or 5.	```java public static int countDivisible(int n) { int count = 0; for (int i = 1; i <= n; i++) { if (i % 3 == 0 || i % 5 == 0) { count++; } } return count; }
Write a function that takes a string as input and returns the string with all uppercase letters changed to lowercase and all lowercase letters changed to uppercase.	```java public class Main { public static String swapCase(String str) { String result = ""; for (int i = 0; i < str.length(); i++) { char ch = str.charAt(i); if (Character.isLowerCase(ch)) { result += Character.toUpperCase(ch); } else { result += Character.toLowerCase(ch); } } return result; } public static void main(String[] args) { System.out.println(swapCase("HeLlO wOrLd")); } }
Write a function that takes a list of strings as input and returns the longest string in the list.	```java import java.util.Arrays; public class Main { public static String findLongestString(String[] strArray) { return Arrays.stream(strArray).max((s1, s2) -> s1.length() - s2.length()).orElse(""); } public static void main(String[] args) { String[] strArray = {"apple", "banana", "cherry", "date"}; System.out.println(findLongestString(strArray)); } }
Write a function that takes an integer as input and returns the sum of its digits.	```java public class Main { public static int sumOfDigits(int num) { int sum = 0; while (num != 0) { sum += num % 10; num /= 10; } return sum; } public static void main(String[] args) { System.out.println(sumOfDigits(12345)); } }
Write a function that takes a string as input and returns the reverse of the string.	```java public class Main { public static String reverseString(String str) { StringBuilder reversed = new StringBuilder(str).reverse(); return reversed.toString(); } public static void main(String[] args) { System.out.println(reverseString("hello world")); } }
Write a function that takes a list of integers as input and returns a list of integers with duplicates removed while maintaining the original order.	```java import java.util.LinkedHashSet; import java.util.Set; public class Main { public static void main(String[] args) { Integer[] numbers = {1, 2, 2, 3, 4, 4, 5, 6, 6}; Integer[] uniqueNumbers = removeDuplicates(numbers); for (Integer number : uniqueNumbers) { System.out.print(number + " "); } } public static Integer[] removeDuplicates(Integer[] numbers) { Set<Integer> set = new LinkedHashSet<…
Given a list of integers, write a function that returns the average of the list.	```java public static double calculateAverage(List<Integer> numbers) { int sum = 0; for (int number : numbers) { sum += number; } return (double) sum / numbers.size(); }
Write a function that takes a string as input and returns the string with all vowels removed.	```java public static String removeVowels(String str) { String vowels = "aeiouAEIOU"; StringBuilder result = new StringBuilder(); for (char c : str.toCharArray()) { if (!vowels.indexOf(c) >= 0) { result.append(c); } } return result.toString(); }
Write a function that takes a list of integers as input and returns a new list where each element is the square of the corresponding element in the input list.	```java public static List<Integer> squareNumbers(List<Integer> numbers) { List<Integer> result = new ArrayList<>(); for (int number : numbers) { result.add(number * number); } return result; }
Create a HashMap with keys 'id', 'firstName', 'lastName', and 'age'. Use the Scanner class to ask the user for the values and store them in the HashMap.	```java import java.util.HashMap; import java.util.Scanner; public static HashMap<String, String> createPersonMap() { HashMap<String, String> personMap = new HashMap<>(); Scanner scanner = new Scanner(System.in); System.out.print("Enter id: "); personMap.put("id", scanner.next()); System.out.print("Enter first name: "); personMap.put("firstName", scanner.next()); System.out.print("Enter last name…
Write a function that takes a string as input and returns true if the string is a palindrome (reads the same backwards as forwards), and false otherwise.	```java public static boolean isPalindrome(String str) { String reversed = new StringBuilder(str).reverse().toString(); return str.equals(reversed); }
Write a Java function that takes an integer as an argument and returns true if it is a perfect square, and false otherwise.	public boolean isPerfectSquare(int n) { int sqrt = (int) Math.sqrt(n); return sqrt * sqrt == n; }
Write a Java function that takes a list of strings as input and returns the string that occurs most frequently in the list.	import java.util.HashMap; import java.util.Map; public String mostFrequentString(List<String> list) { Map<String, Integer> frequencyMap = new HashMap<>(); for (String str : list) { frequencyMap.put(str, frequencyMap.getOrDefault(str, 0) + 1); } String mostFrequent = null; int maxFrequency = 0; for (Map.Entry<String, Integer> entry : frequencyMap.entrySet()) { if (entry.getValue() > maxFrequency) …
Write a Java function that takes a list of integers as input and returns the count of all the numbers that are greater than their previous number.	public int countGreaterNumbers(List<Integer> list) { int count = 0; for (int i = 1; i < list.size(); i++) { if (list.get(i) > list.get(i - 1)) { count++; } } return count; }
Write a Java function that takes a string as input and returns the string with all vowels removed.	public String removeVowels(String str) { String vowels = "aeiouAEIOU"; StringBuilder result = new StringBuilder(); for (char c : str.toCharArray()) { if (!vowels.indexOf(c) >= 0) { result.append(c); } } return result.toString(); }
Write a Java function that takes a list of integers as input and returns the product of all the numbers in the list.	public int multiplyNumbers(List<Integer> list) { int product = 1; for (int num : list) { product *= num; } return product; }
Write a Java function that takes a string as an input and returns the count of the uppercase letters.	public int countUppercaseLetters(String str) { int count = 0; for (int i = 0; i < str.length(); i++) { char ch = str.charAt(i); if (Character.isUpperCase(ch)) { count++; } } return count; }
Write a Java function to find the average of all elements in a given array of integers.	public double findAverage(int[] arr) { int sum = 0; for (int i = 0; i < arr.length; i++) { sum += arr[i]; } return (double) sum / arr.length; }
Create a Java function that takes a sentence as input and returns the sentence in lowercase, if the sentence starts with an uppercase letter.	public String convertCase(String sentence) { if (Character.isUpperCase(sentence.charAt(0))) { return sentence.toLowerCase(); } else { return sentence; } }
Implement a Java function that takes a list of strings as input and returns a new list containing only the strings that start with the letter "a".	public List<String> filterStrings(List<String> list) { List<String> filteredList = new ArrayList<>(); for (String str : list) { if (str.charAt(0) == 'a') { filteredList.add(str); } } return filteredList; }
Write a Java function that takes a matrix as input and returns the sum of the diagonal elements.	public int sumDiagonalElements(int[][] matrix) { int sum = 0; for (int i = 0; i < matrix.length; i++) { sum += matrix[i][i]; } return sum; }
Write a Java function to calculate the average of all elements in a given array of integers.	```java public static double calculateAverage(int[] array) { int sum = 0; for (int num : array) { sum += num; } return (double) sum / array.length; }
Write a Java function to check if a given string is a palindrome, ignoring case and non-alphanumeric characters.	```java public static boolean isPalindrome(String str) { str = str.replaceAll("[^a-zA-Z0-9]", "").toLowerCase(); int left = 0, right = str.length() - 1; while (left < right) { if (str.charAt(left) != str.charAt(right)) { return false; } left++; right--; } return true; }
Write a Java function to find the longest common prefix among an array of strings.	```java public static String longestCommonPrefix(String[] strs) { if (strs.length == 0) { return ""; } String prefix = strs[0]; for (int i = 1; i < strs.length; i++) { while (strs[i].indexOf(prefix) != 0) { prefix = prefix.substring(0, prefix.length() - 1); if (prefix.isEmpty()) { return ""; } } } return prefix; }
Write a Java function to count the number of occurrences of a specified word in a given string, ignoring case.	```java public static int countWordOccurrences(String str, String word) { str = str.toLowerCase(); word = word.toLowerCase(); int count = 0; int index = str.indexOf(word); while (index != -1) { count++; index = str.indexOf(word, index + 1); } return count; }
Write a Java function to count the number of digits in a given integer.	```java public static int countDigits(int num) { int count = 0; while (num != 0) { count++; num /= 10; } return count; }
Write a Java function to count the number of vowels in a given string.	```java public int countVowels(String str) { str = str.toLowerCase(); int count = 0; for (int i = 0; i < str.length(); i++) { char ch = str.charAt(i); if (ch == 'a' || ch == 'e' || ch == 'i' || ch == 'o' || ch == 'u') { count++; } } return count; }
Write a Java function to calculate the average of a set of grades.	```java public double calculateAverage(int[] grades) { int sum = 0; for (int grade : grades) { sum += grade; } return (double) sum / grades.length; }
Create a Java function that takes a string as input and returns the reversed string.	```java public String reverseString(String str) { String reversed = ""; for (int i = str.length() - 1; i >= 0; i--) { reversed += str.charAt(i); } return reversed; }
Write a Java function to find the maximum value in a list of integers.	```java public int findMax(int[] list) { int max = list[0]; for (int i = 1; i < list.length; i++) { if (list[i] > max) { max = list[i]; } } return max; }
Create a Java function to check if a given number is a palindrome.	```java public boolean isPalindrome(int num) { int reversed = 0; int original = num; while (num != 0) { int digit = num % 10; reversed = reversed * 10 + digit; num /= 10; } return original == reversed; }
Write a Java program to count the number of vowels in a given string.	public class Main { public static int countVowels(String str) { int count = 0; for (int i = 0; i < str.length(); i++) { char ch = str.charAt(i); if (ch == 'a' || ch == 'e' || ch == 'i' || ch == 'o' || ch == 'u' || ch == 'A' || ch == 'E' || ch == 'I' || ch == 'O' || ch == 'U') { count++; } } return count; } public static void main(String[] args) { String str = "Hello World"; System.out.println("Nu…
Develop a Java program to find the average of all elements in a given array.	public class Main { public static double calculateAverage(int[] arr) { int sum = 0; for (int i : arr) { sum += i; } return (double) sum / arr.length; } public static void main(String[] args) { int[] arr = {1, 2, 3, 4, 5}; System.out.println("Average: " + calculateAverage(arr)); } }
Write a Java function to check if a given number is a perfect square.	public class Main { public static boolean isPerfectSquare(int num) { int sqrt = (int) Math.sqrt(num); return sqrt * sqrt == num; } public static void main(String[] args) { int num = 16; System.out.println("Is " + num + " a perfect square? " + isPerfectSquare(num)); } }
Create a Java program that takes a string as input and returns the string with all vowels removed.	public class Main { public static String removeVowels(String str) { String result = ""; for (int i = 0; i < str.length(); i++) { char ch = str.charAt(i); if (ch != 'a' && ch != 'e' && ch != 'i' && ch != 'o' && ch != 'u' && ch != 'A' && ch != 'E' && ch != 'I' && ch != 'O' && ch != 'U') { result += ch; } } return result; } public static void main(String[] args) { String str = "Hello World"; System.…
Write a Java function to find the second largest element in a given array.	public class Main { public static int findSecondLargest(int[] arr) { int max = Integer.MIN_VALUE; int secondMax = Integer.MIN_VALUE; for (int i : arr) { if (i > max) { secondMax = max; max = i; } else if (i > secondMax && i != max) { secondMax = i; } } return secondMax; } public static void main(String[] args) { int[] arr = {5, 10, 7, 3, 20}; System.out.println("Second largest element: " + findSe…
Write a function that takes two strings as input and returns the longest common substring between the two strings.	```java public class Main { public static String longestCommonSubstring(String s1, String s2) { int[][] dp = new int[s1.length()+1][s2.length()+1]; int maxLength = 0; int endIndex = 0; for (int i = 1; i <= s1.length(); i++) { for (int j = 1; j <= s2.length(); j++) { if (s1.charAt(i - 1) == s2.charAt(j - 1)) { dp[i][j] = dp[i - 1][j - 1] + 1; if (dp[i][j] > maxLength) { maxLength = dp[i][j]; endIn…
Write a function that takes a list of integers as input and returns the count of prime numbers in the list.	```java public class Main { public static int countPrimeNumbers(List<Integer> numbers) { int count = 0; for (int num : numbers) { if (isPrime(num)) { count++; } } return count; } public static boolean isPrime(int num) { if (num <= 1) { return false; } for (int i = 2; i * i <= num; i++) { if (num % i == 0) { return false; } } return true; } public static void main(String[] args) { List<Integer> nu…
Write a function that takes a list of strings as input and returns the string with the maximum length.	```java public class Main { public static String longestString(List<String> strings) { String longest = ""; for (String str : strings) { if (str.length() > longest.length()) { longest = str; } } return longest; } public static void main(String[] args) { List<String> strings = Arrays.asList("apple", "banana", "orange", "grape"); System.out.println(longestString(strings)); } }
Write a function that takes a list of integers as input and returns the count of even numbers in the list.	```java public class Main { public static int countEvenNumbers(List<Integer> numbers) { int count = 0; for (int num : numbers) { if (num % 2 == 0) { count++; } } return count; } public static void main(String[] args) { List<Integer> numbers = Arrays.asList(1, 2, 3, 4, 5, 6, 7, 8, 9, 10); System.out.println(countEvenNumbers(numbers)); } }
Write a function that takes a list of strings as input and returns the concatenation of all the strings in the list.	```java public class Main { public static String concatenateStrings(List<String> strings) { StringBuilder sb = new StringBuilder(); for (String str : strings) { sb.append(str); } return sb.toString(); } public static void main(String[] args) { List<String> strings = Arrays.asList("hello", "world", "java", "programming"); System.out.println(concatenateStrings(strings)); } }
Create a Java function that takes a list of strings and returns a new list containing the strings in uppercase.	```java import java.util.*; public class Main { public static List<String> convertToUppercase(List<String> strings) { List<String> uppercaseStrings = new ArrayList<>(); for (String str : strings) { uppercaseStrings.add(str.toUpperCase()); } return uppercaseStrings; } public static void main(String[] args) { List<String> strings = Arrays.asList("hello", "world", "java"); List<String> uppercaseStri…
Write a Java function to find the maximum value in a given 2D array.	```java public class Main { public static int findMaxValue(int[][] array) { int maxValue = array[0][0]; for (int i = 0; i < array.length; i++) { for (int j = 0; j < array[i].length; j++) { if (array[i][j] > maxValue) { maxValue = array[i][j]; } } } return maxValue; } public static void main(String[] args) { int[][] array = {{1, 2, 3}, {4, 5, 6}, {7, 8, 9}}; int maxValue = findMaxValue(array); Sys…
Create a Java function that takes a list of integers and returns the count of numbers greater than a given number.	```java import java.util.*; public class Main { public static int countGreaterNumbers(List<Integer> numbers, int target) { int count = 0; for (int num : numbers) { if (num > target) { count++; } } return count; } public static void main(String[] args) { List<Integer> numbers = Arrays.asList(1, 2, 3, 4, 5, 6); int target = 3; int count = countGreaterNumbers(numbers, target); System.out.println(cou…
Write a Java function to convert a given binary string to an integer.	```java public class Main { public static int binaryStringToInt(String binaryString) { return Integer.parseInt(binaryString, 2); } public static void main(String[] args) { String binaryString = "1010"; int decimal = binaryStringToInt(binaryString); System.out.println(decimal); } }
Create a Java function that takes a list of strings and returns the longest string in the list.	```java import java.util.*; public class Main { public static String findLongestString(List<String> strings) { String longestString = ""; for (String str : strings) { if (str.length() > longestString.length()) { longestString = str; } } return longestString; } public static void main(String[] args) { List<String> strings = Arrays.asList("hello", "world", "java", "programming"); String longestStri…
Write a Java function to find the maximum element in a given array of integers.	public int findMax(int[] arr) { int max = arr[0]; for(int i = 1; i < arr.length; i++) { if(arr[i] > max) { max = arr[i]; } } return max; }
Create a Java function to count the number of vowels in a given string.	public int countVowels(String str) { int count = 0; for(int i = 0; i < str.length(); i++) { char ch = str.charAt(i); if(ch == 'a' || ch == 'e' || ch == 'i' || ch == 'o' || ch == 'u' || ch == 'A' || ch == 'E' || ch == 'I' || ch == 'O' || ch == 'U') { count++; } } return count; }
Write a Java function to find the second smallest element in a given array of integers.	public int findSecondSmallest(int[] arr) { int min1 = Integer.MAX_VALUE, min2 = Integer.MAX_VALUE; for(int i = 0; i < arr.length; i++) { if(arr[i] <= min1) { min2 = min1; min1 = arr[i]; } else if(arr[i] < min2 && arr[i] != min1) { min2 = arr[i]; } } if(min2 == Integer.MAX_VALUE) { return -1; // return -1 if there is no second smallest element } else { return min2; } }
Create a Java function to reverse a given string.	public String reverseString(String str) { StringBuilder reversed = new StringBuilder(); for(int i = str.length() - 1; i >= 0; i--) { reversed.append(str.charAt(i)); } return reversed.toString(); }
Write a Java function to find the first duplicate element in a given array of integers.	public int findFirstDuplicate(int[] arr) { Set<Integer> set = new HashSet<>(); for(int i = 0; i < arr.length; i++) { if(set.contains(arr[i])) { return arr[i]; } else { set.add(arr[i]); } } return -1; // return -1 if there is no duplicate element }
Write a Java function that takes a string as input and returns the count of vowels in the string.	public int countVowels(String str) { int count = 0; String vowels = "aeiouAEIOU"; for (int i = 0; i < str.length(); i++) { if (vowels.indexOf(str.charAt(i)) != -1) { count++; } } return count; }
Write a Java function that takes a list of integers as input and returns the count of numbers that are greater than their adjacent numbers.	public int countGreaterAdjacent(List<Integer> list) { int count = 0; for (int i = 0; i < list.size() - 1; i++) { if (list.get(i) < list.get(i + 1)) { count++; } } return count; }
Create a Java program that determines whether a given string is a palindrome or not.	public boolean isPalindrome(String str) { int i = 0, j = str.length() - 1; while (i < j) { if (str.charAt(i) != str.charAt(j)) { return false; } i++; j--; } return true; }
Write a Java function that takes a dictionary as input and returns the count of values that are greater than 10.	public int countValuesGreaterThanTen(Map<String, Integer> map) { int count = 0; for (int value : map.values()) { if (value > 10) { count++; } } return count; }
You are given a list of strings and you need to write a Java function that returns the longest string in the list.	public String findLongestString(List<String> list) { String longest = ""; for (String str : list) { if (str.length() > longest.length()) { longest = str; } } return longest; }
Write a Java program to create a function `check_palindrome` that takes a string as input and returns true if the string is a palindrome and false otherwise.	```java public class Main { public static boolean check_palindrome(String str) { String reversed = new StringBuilder(str).reverse().toString(); return str.equals(reversed); } public static void main(String[] args) { System.out.println(check_palindrome("madam")); // prints: true System.out.println(check_palindrome("hello")); // prints: false } }
Create a function that takes a list of integers as input and returns the average of the numbers in the list, rounded to two decimal places.	```java public class Main { public static double calculate_average(int[] numbers) { double sum = 0; for (int num : numbers) { sum += num; } return Math.round((sum / numbers.length) * 100.0) / 100.0; } public static void main(String[] args) { int[] numbers = {1, 2, 3, 4, 5}; System.out.println(calculate_average(numbers)); // prints: 3.00 } }
Write a Java program to create a function `count_vowels` that takes a string as input and returns the number of vowels in the string.	```java public class Main { public static int count_vowels(String str) { str = str.toLowerCase(); int count = 0; for (char c : str.toCharArray()) { if (c == 'a' || c == 'e' || c == 'i' || c == 'o' || c == 'u') { count++; } } return count; } public static void main(String[] args) { System.out.println(count_vowels("Hello World")); // prints: 3 } }
Create a function that takes a list of strings as input and returns the string with the maximum length.	```java public class Main { public static String longest_string(String[] strings) { String longest = ""; for (String str : strings) { if (str.length() > longest.length()) { longest = str; } } return longest; } public static void main(String[] args) { String[] strings = {"hello", "world", "java", "programming"}; System.out.println(longest_string(strings)); // prints: programming } }
Write a Java program to create a function `split_string` that takes a string and a delimiter as input and returns a list of substrings separated by the delimiter.	```java import java.util.Arrays; public class Main { public static String[] split_string(String str, String delimiter) { return str.split(delimiter); } public static void main(String[] args) { String[] result = split_string("hello,world,java,programming", ","); System.out.println(Arrays.toString(result)); // prints: [hello, world, java, programming] } }
Write a function that accepts a time duration in minutes as an input and returns the equivalent time duration in hours and minutes.	public class Main { public static String minutesToHours(int minutes) { int hours = minutes / 60; int remainingMinutes = minutes % 60; return hours + " hours and " + remainingMinutes + " minutes"; } public static void main(String[] args) { int timeInMinutes = 120; System.out.println(minutesToHours(timeInMinutes)); } }
Write a function that takes a list of integers as input and returns the count of all numbers that are divisible by 3.	public class Main { public static int countDivisibleByThree(int[] numbers) { int count = 0; for (int number : numbers) { if (number % 3 == 0) { count++; } } return count; } public static void main(String[] args) { int[] numbers = {1, 2, 3, 4, 5, 6, 7, 8, 9}; System.out.println(countDivisibleByThree(numbers)); } }
Write a function that takes a string as input and checks whether it is a palindrome or not.	public class Main { public static boolean isPalindrome(String input) { String reversed = new StringBuilder(input).reverse().toString(); return input.equalsIgnoreCase(reversed); } public static void main(String[] args) { String input = "madam"; System.out.println(isPalindrome(input)); } }
Write a function that takes a list of integers as input and returns the second smallest number in the list.	public class Main { public static int findSecondSmallest(int[] numbers) { int smallest = Integer.MAX_VALUE; int secondSmallest = Integer.MAX_VALUE; for (int number : numbers) { if (number < smallest) { secondSmallest = smallest; smallest = number; } else if (number < secondSmallest && number != smallest) { secondSmallest = number; } } return secondSmallest; } public static void main(String[] args…
Write a function that takes a list of strings as input and returns the count of all strings that start with a vowel.	public class Main { public static int countStringsStartingWithVowel(String[] strings) { int count = 0; for (String str : strings) { char firstChar = str.charAt(0); if (firstChar == 'a' || firstChar == 'e' || firstChar == 'i' || firstChar == 'o' || firstChar == 'u' || firstChar == 'A' || firstChar == 'E' || firstChar == 'I' || firstChar == 'O' || firstChar == 'U') { count++; } } return count; } pu…
Write a function to count the number of vowels in a given string.	". Here are the five new problem-solution pairs: problem: Write a function to count the number of vowels in a given string; ; solution: ```java public int countVowels(String str) { int count = 0; for (int i = 0; i < str.length(); i++) { char c = str.charAt(i); if (c == 'a' || c == 'e' || c == 'i' || c == 'o' || c == 'u' || c == 'A' || c == 'E' || c == 'I' || c == 'O' || c == 'U') { count++; } } r…
Write a function to find the sum of all elements in a given array.	```java public int sumArrayElements(int[] arr) { int sum = 0; for (int i = 0; i < arr.length; i++) { sum += arr[i]; } return sum; }
Create a function to check if a given string is a palindrome.	```java public boolean isPalindrome(String str) { int i = 0, j = str.length() - 1; while (i < j) { if (str.charAt(i) != str.charAt(j)) { return false; } i++; j--; } return true; }
Write a function to find the average of all elements in a given array.	```java public double averageArrayElements(int[] arr) { int sum = 0; for (int i = 0; i < arr.length; i++) { sum += arr[i]; } return (double) sum / arr.length; }
Create a function to find the last occurrence of a specified element in a list.	```java public int lastOccurrence(int[] arr, int target) { for (int i = arr.length - 1; i >= 0; i--) { if (arr[i] == target) { return i; } } return -1; }
Write a function to find the frequency of each element in a given array of integers.	public class Main { public static void frequency(int[] arr) { for(int i = 0; i < arr.length; i++) { int count = 1; for(int j = i + 1; j < arr.length; j++) { if(arr[i] == arr[j]) { count++; } } System.out.println("Frequency of " + arr[i] + " is " + count); } } public static void main(String[] args) { int[] arr = {1, 2, 2, 3, 3, 3, 4, 4, 4, 4}; frequency(arr); } }
Implement a function to convert a given binary number to decimal.	public class Main { public static int binaryToDecimal(String binary) { int decimal = 0; int base = 1; for(int i = binary.length() - 1; i >= 0; i--) { if(binary.charAt(i) == '1') { decimal += base; } base = base * 2; } return decimal; } public static void main(String[] args) { String binary = "1010"; System.out.println("The decimal representation of " + binary + " is " + binaryToDecimal(binary)); …
Write a function to check if a given array of integers is sorted in ascending order.	public class Main { public static boolean isSorted(int[] arr) { for(int i = 0; i < arr.length - 1; i++) { if(arr[i] > arr[i + 1]) { return false; } } return true; } public static void main(String[] args) { int[] arr = {1, 2, 3, 4, 5}; if(isSorted(arr)) { System.out.println("The array is sorted in ascending order"); } else { System.out.println("The array is not sorted in ascending order"); } } }
Implement a function to find the first duplicate in a given array of integers.	public class Main { public static Integer findFirstDuplicate(int[] arr) { for(int i = 0; i < arr.length; i++) { for(int j = i + 1; j < arr.length; j++) { if(arr[i] == arr[j]) { return arr[i]; } } } return null; } public static void main(String[] args) { int[] arr = {1, 2, 3, 4, 2, 5, 6}; Integer duplicate = findFirstDuplicate(arr); if(duplicate != null) { System.out.println("The first duplicate i…
Write a function to find all pairs of elements in a given array of integers that add up to a given target sum.	public class Main { public static void findPairs(int[] arr, int targetSum) { for(int i = 0; i < arr.length; i++) { for(int j = i + 1; j < arr.length; j++) { if(arr[i] + arr[j] == targetSum) { System.out.println("Pair found: (" + arr[i] + ", " + arr[j] + ")"); } } } } public static void main(String[] args) { int[] arr = {1, 2, 3, 4, 5, 6}; int targetSum = 7; findPairs(arr, targetSum); } }
Write a Java function that takes a list of strings as input and returns the total number of characters in all the strings.	```java public int countCharacters(List<String> strings) { int totalCharacters = 0; for (String str : strings) { totalCharacters += str.length(); } return totalCharacters; }
You are given a list of integers as input. Write a function that takes this list as an argument and returns true if all the numbers are even, false otherwise.	```java public boolean allEven(List<Integer> numbers) { for (int num : numbers) { if (num % 2 != 0) { return false; } } return true; }
Create a function called `commonElements` that takes two lists of integers as input and returns a new list containing the common elements between the two lists.	```java public List<Integer> commonElements(List<Integer> list1, List<Integer> list2) { List<Integer> commonList = new ArrayList<>(); for (int num : list1) { if (list2.contains(num)) { commonList.add(num); } } return commonList; }
You are given a string as input. Write a function that takes this string as an argument and returns the number of vowels in the string.	```java public int countVowels(String str) { int vowelCount = 0; for (char c : str.toLowerCase().toCharArray()) { if (c == 'a' || c == 'e' || c == 'i' || c == 'o' || c == 'u') { vowelCount++; } } return vowelCount; }
Write a Java function that takes a list of integers as input and returns the number of pairs of consecutive numbers that have a difference of 1.	```java public int countConsecutivePairs(List<Integer> numbers) { int pairCount = 0; for (int i = 0; i < numbers.size() - 1; i++) { if (Math.abs(numbers.get(i) - numbers.get(i + 1)) == 1) { pairCount++; } } return pairCount; }
Write a Java function to find the middle element of a singly linked list.	```java public class Solution { static class ListNode { int val; ListNode next; ListNode(int x) { val = x; } } public static ListNode middleElement(ListNode head) { ListNode slow = head, fast = head; while (fast != null && fast.next != null) { slow = slow.next; fast = fast.next.next; } return slow; } }
You are given a list of strings. Write a function to find the longest string in the list.	```java public class Solution { public static String findLongestString(List<String> strings) { String longestString = strings.get(0); for (String str : strings) { if (str.length() > longestString.length()) { longestString = str; } } return longestString; } }
Write a function that takes a list of integers as input and returns the frequency of each element in the list.	```java public class Solution { public static Map<Integer, Integer> elementFrequency(List<Integer> numbers) { Map<Integer, Integer> frequencyMap = new HashMap<>(); for (Integer num : numbers) { frequencyMap.put(num, frequencyMap.getOrDefault(num, 0) + 1); } return frequencyMap; } }
You are given a list of binary trees. Write a function to find the tallest tree in the list.	```java public class Solution { static class TreeNode { int val; TreeNode left; TreeNode right; TreeNode(int x) { val = x; } } public static TreeNode findTallestTree(List<TreeNode> trees) { TreeNode tallestTree = trees.get(0); for (TreeNode tree : trees) { int height1 = getHeight(tallestTree); int height2 = getHeight(tree); if (height2 > height1) { tallestTree = tree; } } return tallestTree; } pu…
You are given a dictionary where the keys are names of students and the values are their corresponding scores. Write a function to find the student with the highest score.	```java public class Solution { public static String findHighestScorer(Map<String, Integer> scores) { String highestScorer = ""; int highestScore = 0; for (Map.Entry<String, Integer> entry : scores.entrySet()) { if (entry.getValue() > highestScore) { highestScore = entry.getValue(); highestScorer = entry.getKey(); } } return highestScorer; } }
Write a function that takes a string and a list of words as input. Return True if all words in the list are present in the string, False otherwise. The words in the list can be in any case.	public boolean containsAllWords(String str, List<String> words) { str = str.toLowerCase(); for (String word : words) { if (!str.contains(word.toLowerCase())) { return false; } } return true; }
Write a function that takes a list of integers as input and returns the number of unique elements in the list.	public int countUniqueElements(List<Integer> list) { Set<Integer> set = new HashSet<>(list); return set.size(); }
Define a function that takes a list of integers as input and returns the smallest missing positive integer.	public int findSmallestMissingPositive(List<Integer> list) { Set<Integer> set = new HashSet<>(); for (int num : list) { if (num > 0) { set.add(num); } } int smallestMissing = 1; while (set.contains(smallestMissing)) { smallestMissing++; } return smallestMissing; }
Write a function that takes a string as input and returns True if the string is a palindrome, False otherwise. The function should be case-insensitive.	public boolean isPalindrome(String str) { str = str.replaceAll("[^a-zA-Z0-9]", "").toLowerCase(); int left = 0; int right = str.length() - 1; while (left < right) { if (str.charAt(left) != str.charAt(right)) { return false; } left++; right--; } return true; }
Write a function that takes a list of strings as input and returns the string with the maximum length. If there are multiple strings with the same maximum length, return any one of them.	public String findLongestString(List<String> list) { String longestStr = ""; for (String str : list) { if (str.length() > longestStr.length()) { longestStr = str; } } return longestStr; }
Create a Java function that takes a string as input and returns the string with all consonants removed.	public class Main { public static String removeConsonants(String str) { String result = ""; for (int i = 0; i < str.length(); i++) { char ch = str.charAt(i); if ((ch == 'a' || ch == 'e' || ch == 'i' || ch == 'o' || ch == 'u') || (ch == 'A' || ch == 'E' || ch == 'I' || ch == 'O' || ch == 'U')) { result += ch; } } return result; } public static void main(String[] args) { System.out.println(removeCo…
Implement a Java function that takes a string as input and returns True if the string contains at least one digit, False otherwise.	public class Main { public static boolean hasDigit(String str) { for (int i = 0; i < str.length(); i++) { if (Character.isDigit(str.charAt(i))) { return true; } } return false; } public static void main(String[] args) { System.out.println(hasDigit("Hello123World")); } }
Write a Java function that takes a string as input and returns the reversed string.	public class Main { public static String reverseString(String str) { StringBuilder reversed = new StringBuilder(str); return reversed.reverse().toString(); } public static void main(String[] args) { System.out.println(reverseString("Hello World")); } }
Implement a Java function that takes an integer as input and returns the factorial of the number.	public class Main { public static long factorial(int n) { long result = 1; for (int i = 2; i <= n; i++) { result *= i; } return result; } public static void main(String[] args) { System.out.println(factorial(5)); } }
Write a Java function that takes an integer array as input and returns the maximum element in the array.	public class Main { public static int maxElement(int[] arr) { int max = arr[0]; for (int i = 1; i < arr.length; i++) { if (arr[i] > max) { max = arr[i]; } } return max; } public static void main(String[] args) { int[] arr = {5, 2, 8, 1, 9}; System.out.println(maxElement(arr)); } }
Write a Java function to find the maximum element in a given array of integers.	```java public class Main { public static int findMax(int[] arr) { int max = arr[0]; for (int i = 1; i < arr.length; i++) { if (arr[i] > max) { max = arr[i]; } } return max; } public static void main(String[] args) { int[] arr = {5, 2, 1, 9, 4}; System.out.println("Maximum element is " + findMax(arr)); } }
Write a Java function that accepts a string as input and returns the string with all vowels removed.	```java public class Main { public static String removeVowels(String str) { String vowels = "aeiouAEIOU"; StringBuilder result = new StringBuilder(); for (char c : str.toCharArray()) { if (vowels.indexOf(c) == -1) { result.append(c); } } return result.toString(); } public static void main(String[] args) { String str = "Hello World!"; System.out.println("Original string: " + str); System.out.print…
Write a Java function that accepts a list of strings as input and returns the longest string in the list.	```java import java.util.*; public class Main { public static String findLongestString(List<String> list) { String longest = list.get(0); for (String str : list) { if (str.length() > longest.length()) { longest = str; } } return longest; } public static void main(String[] args) { List<String> list = Arrays.asList("apple", "banana", "cherry", "date"); System.out.println("Longest string is " + find…
Write a Java function that accepts a string as input and returns True if the string is a palindrome, False otherwise.	```java public class Main { public static boolean isPalindrome(String str) { int start = 0; int end = str.length() - 1; while (start < end) { if (str.charAt(start) != str.charAt(end)) { return false; } start++; end--; } return true; } public static void main(String[] args) { String str = "madam"; System.out.println("Is " + str + " a palindrome? " + isPalindrome(str)); } }
Write a Java function that accepts a list of integers as input and returns the average of the numbers in the list.	```java import java.util.*; public class Main { public static double calculateAverage(List<Integer> list) { int sum = 0; for (int num : list) { sum += num; } return (double) sum / list.size(); } public static void main(String[] args) { List<Integer> list = Arrays.asList(1, 2, 3, 4, 5); System.out.println("Average is " + calculateAverage(list)); } }
Write a function that takes a list of strings as an input and returns the count of strings that start with a vowel.	```java public int countVowelStrings(List<String> strings) { int count = 0; for (String s : strings) { String firstLetter = s.substring(0, 1).toLowerCase(); if (firstLetter.equals("a") || firstLetter.equals("e") || firstLetter.equals("i") || firstLetter.equals("o") || firstLetter.equals("u")) { count++; } } return count; }
Write a function that takes a list of integers as input and returns the average of all the numbers in the list.	```java public double calculateAverage(List<Integer> numbers) { int sum = 0; for (int num : numbers) { sum += num; } return (double) sum / numbers.size(); }
Write a function that takes a string as an input and returns the string with all consonants removed.	```java public String removeConsonants(String str) { String newStr = ""; for (char c : str.toLowerCase().toCharArray()) { if (c == 'a' || c == 'e' || c == 'i' || c == 'o' || c == 'u' || c == ' ') { newStr += c; } } return newStr; }
Write a function that takes a list of integers as input and returns the number of elements that are prime numbers.	```java public int countPrimeNumbers(List<Integer> numbers) { int count = 0; for (int num : numbers) { if (isPrime(num)) { count++; } } return count; } public boolean isPrime(int n) { if (n <= 1) { return false; } for (int i = 2; i <= Math.sqrt(n); i++) { if (n % i == 0) { return false; } } return true; }
Write a function that takes a list of strings as input and returns the string with the maximum length.	```java public String maxLengthString(List<String> strings) { String maxLengthStr = ""; for (String s : strings) { if (s.length() > maxLengthStr.length()) { maxLengthStr = s; } } return maxLengthStr; }
Write a function called '(calc_avg)' that takes an array of integers as input and returns the average value of the array elements.	public class Main { public static double calc_avg(int[] array) { int sum = 0; for (int i = 0; i < array.length; i++) { sum += array[i]; } return (double) sum / array.length; } public static void main(String[] args) { int[] array = {1, 2, 3, 4, 5}; System.out.println(calc_avg(array)); } }
Implement a function to count the number of uppercase letters in a given string.	public class Main { public static int countUppercase(String str) { int count = 0; for (int i = 0; i < str.length(); i++) { if (Character.isUpperCase(str.charAt(i))) { count++; } } return count; } public static void main(String[] args) { String str = "HelloWorld"; System.out.println(countUppercase(str)); } }
Write a Java function that takes a string input and returns the string with all vowels removed.	public class Main { public static String removeVowels(String str) { StringBuilder result = new StringBuilder(); for (int i = 0; i < str.length(); i++) { char c = str.charAt(i); if (!(c == 'a' || c == 'e' || c == 'i' || c == 'o' || c == 'u' || c == 'A' || c == 'E' || c == 'I' || c == 'O' || c == 'U')) { result.append(c); } } return result.toString(); } public static void main(String[] args) { Stri…
Implement a function to find the maximum element in a given array of integers.	public class Main { public static int findMax(int[] array) { int max = array[0]; for (int i = 1; i < array.length; i++) { if (array[i] > max) { max = array[i]; } } return max; } public static void main(String[] args) { int[] array = {5, 2, 8, 3, 1}; System.out.println(findMax(array)); } }
Write a function that takes two integer parameters and returns their greatest common divisor (GCD).	public class Main { public static int gcd(int a, int b) { if (b == 0) { return a; } else { return gcd(b, a % b); } } public static void main(String[] args) { int a = 48, b = 18; System.out.println(gcd(a, b)); } }
Write a function that takes two arrays as input and returns true if they have the same elements in the same order, and false otherwise.	public boolean areArraysEqual(int[] arr1, int[] arr2) { if (arr1 == null && arr2 == null) { return true; } if (arr1 == null || arr2 == null) { return false; } if (arr1.length != arr2.length) { return false; } for (int i = 0; i < arr1.length; i++) { if (arr1[i] != arr2[i]) { return false; } } return true; }
Write a function that takes a list of integers as input and returns the count of perfect squares in the list.	public int countPerfectSquares(List<Integer> nums) { int count = 0; for (int num : nums) { double squareRoot = Math.sqrt(num); if (squareRoot == (int) squareRoot) { count++; } } return count; }
Write a function that takes a string as input and returns the string with all occurrences of a specified substring removed.	public String removeSubstring(String str, String substr) { while (str.contains(substr)) { str = str.replace(substr, ""); } return str; }
Write a function that takes a list of strings as input and returns a list of strings with all strings in uppercase.	public List<String> toUpperCase(List<String> strs) { List<String> upperCaseList = new ArrayList<>(); for (String str : strs) { upperCaseList.add(str.toUpperCase()); } return upperCaseList; }
Write a function that takes a list of integers as input and returns the maximum number of consecutive ones in the binary representation of the numbers in the list.	public int maxConsecutiveOnes(List<Integer> nums) { int maxOnes = 0; for (int num : nums) { String binStr = Integer.toBinaryString(num); int ones = 0; for (char c : binStr.toCharArray()) { if (c == '1') { ones++; maxOnes = Math.max(maxOnes, ones); } else { ones = 0; } } } return maxOnes; }
Write a Java function that takes a list of integers as input and returns the count of all prime numbers in the list.	```java public class Main { public static void main(String[] args) { List<Integer> list = Arrays.asList(1, 2, 3, 4, 5, 6, 7, 8, 9, 10); System.out.println(countPrimeNumbers(list)); } public static int countPrimeNumbers(List<Integer> list) { int count = 0; for (int num : list) { if (isPrime(num)) { count++; } } return count; } public static boolean isPrime(int num) { if (num <= 1) { return false; …
Implement a Java program that takes an array of integers as input and returns the array rotated to the right by one position.	```java public class Main { public static void main(String[] args) { int[] array = {1, 2, 3, 4, 5}; array = rotateArray(array); for (int num : array) { System.out.print(num + " "); } } public static int[] rotateArray(int[] array) { int temp = array[array.length - 1]; for (int i = array.length - 1; i > 0; i--) { array[i] = array[i - 1]; } array[0] = temp; return array; } }
Write a Java function that takes a string as input and returns the string with all consonants replaced with '*'.	```java public class Main { public static void main(String[] args) { System.out.println(replaceConsonants("Hello World")); } public static String replaceConsonants(String str) { String result = ""; for (char c : str.toCharArray()) { if (!isVowel(c)) { result += "*"; } else { result += c; } } return result; } public static boolean isVowel(char c) { c = Character.toUpperCase(c); return c == 'A' || …
Implement a Java program that takes an array of integers as input and returns the array with all duplicate elements removed.	```java import java.util.*; public class Main { public static void main(String[] args) { int[] array = {1, 2, 2, 3, 4, 4, 5}; array = removeDuplicates(array); for (int num : array) { System.out.print(num + " "); } } public static int[] removeDuplicates(int[] array) { Set<Integer> set = new HashSet<>(); for (int num : array) { set.add(num); } int[] result = new int[set.size()]; int i = 0; for (int…
Write a Java function that takes a string as input and returns the length of the longest word in the string.	```java public class Main { public static void main(String[] args) { System.out.println(longestWordLength("Hello World this is a test")); } public static int longestWordLength(String str) { String[] words = str.split(" "); int maxLength = 0; for (String word : words) { maxLength = Math.max(maxLength, word.length()); } return maxLength; } }
Write a Java function to calculate the sum of digits of a given number.	public class Main { public static int sumOfDigits(int num) { int sum = 0; while (num != 0) { sum += num % 10; num /= 10; } return sum; } public static void main(String[] args) { int num = 123; System.out.println("Sum of digits of " + num + " is " + sumOfDigits(num)); } }
Write a Java function to find the first duplicate in an array of integers.	import java.util.HashSet; public class Main { public static Integer findFirstDuplicate(int[] arr) { HashSet<Integer> set = new HashSet<>(); for (int i = 0; i < arr.length; i++) { if (set.contains(arr[i])) { return arr[i]; } else { set.add(arr[i]); } } return null; } public static void main(String[] args) { int[] arr = {1, 2, 3, 4, 2, 7, 8, 8, 9}; System.out.println("First duplicate in array is " …
Write a Java function to count the number of occurrences of a substring in a given string.	public class Main { public static int countSubstring(String str, String substr) { int count = 0; int index = 0; while ((index = str.indexOf(substr, index)) != -1) { count++; index += substr.length(); } return count; } public static void main(String[] args) { String str = "Hello Hello World"; String substr = "Hello"; System.out.println("Number of occurrences of '" + substr + "' in '" + str + "' is…
Write a Java function to reverse a given string without using any built-in reverse function.	public class Main { public static String reverseString(String str) { String reversed = ""; for (int i = str.length() - 1; i >= 0; i--) { reversed += str.charAt(i); } return reversed; } public static void main(String[] args) { String str = "Hello World"; System.out.println("Reversed string is " + reverseString(str)); } }
Write a Java function to find the maximum product of three numbers in an array.	public class Main { public static int maxProduct(int[] arr) { int max1 = Integer.MIN_VALUE; int max2 = Integer.MIN_VALUE; int max3 = Integer.MIN_VALUE; int min1 = Integer.MAX_VALUE; int min2 = Integer.MAX_VALUE; for (int i = 0; i < arr.length; i++) { if (arr[i] > max1) { max3 = max2; max2 = max1; max1 = arr[i]; } else if (arr[i] > max2) { max3 = max2; max2 = arr[i]; } else if (arr[i] > max3) { ma…
Write a function to find the maximum profit from a list of stock prices where you can buy and sell stocks multiple times.	public static int maxProfit(int[] prices) { int maxProfit = 0; for (int i = 1; i < prices.length; i++) { if (prices[i] > prices[i - 1]) { maxProfit += prices[i] - prices[i - 1]; } } return maxProfit; }
Write a function to find the first duplicate in a list of integers.	public static int firstDuplicate(int[] nums) { Map<Integer, Integer> map = new HashMap<>(); for (int i = 0; i < nums.length; i++) { if (map.containsKey(nums[i])) { return nums[i]; } map.put(nums[i], i); } return -1; }
Write a function to find the average of all the elements in a 2D array.	public static double average(int[][] arr) { int sum = 0; int count = 0; for (int i = 0; i < arr.length; i++) { for (int j = 0; j < arr[i].length; j++) { sum += arr[i][j]; count++; } } return (double) sum / count; }
Write a function to find the maximum difference between two elements in an array.	public static int maxDifference(int[] arr) { int maxDiff = Integer.MIN_VALUE; int minElement = arr[0]; for (int i = 1; i < arr.length; i++) { if (arr[i] - minElement > maxDiff) { maxDiff = arr[i] - minElement; } if (arr[i] < minElement) { minElement = arr[i]; } } return maxDiff; }
Write a function to find the most frequent element in a list of integers.	public static int mostFrequent(int[] nums) { Map<Integer, Integer> map = new HashMap<>(); for (int num : nums) { map.put(num, map.getOrDefault(num, 0) + 1); } int maxCount = 0; int mostFrequentNum = 0; for (Map.Entry<Integer, Integer> entry : map.entrySet()) { if (entry.getValue() > maxCount) { maxCount = entry.getValue(); mostFrequentNum = entry.getKey(); } } return mostFrequentNum; }
Write a function that takes a list of strings as input and returns the longest string in the list.	public class Main { public static String findLongestString(List<String> strList) { String longestString = strList.get(0); for (String str : strList) { if (str.length() > longestString.length()) { longestString = str; } } return longestString; } }
Write a function to calculate the sum of the digits of a given integer.	public class Main { public static int sumDigits(int num) { int sum = 0; while (num > 0) { sum += num % 10; num /= 10; } return sum; } }
Implement a function that takes a list of integers as input and returns the number of even numbers in the list.	public class Main { public static int countEvenNumbers(List<Integer> numList) { int count = 0; for (int num : numList) { if (num % 2 == 0) { count++; } } return count; } }
Write a function that takes a string as input and returns the string with all the characters in uppercase.	public class Main { public static String toUpperCase(String str) { return str.toUpperCase(); } }
Implement a function that takes two integers as input and returns the greatest common divisor (GCD) of the two integers.	public class Main { public static int findGCD(int num1, int num2) { if (num2 == 0) { return num1; } else { return findGCD(num2, num1 % num2); } } }
You are given a list of integers and a target sum. Write a Java function that takes this list and target sum as input and returns a boolean value indicating whether it is possible to get the target sum using the elements of the list, with the constraint that each element can be used only once.	``` public boolean canGetTargetSum(int[] nums, int targetSum) { return canGetTargetSumHelper(nums, targetSum, 0, 0); } private boolean canGetTargetSumHelper(int[] nums, int targetSum, int currentIndex, int currentSum) { if (currentSum == targetSum) { return true; } if (currentIndex == nums.length || currentSum > targetSum) { return false; } return canGetTargetSumHelper(nums, targetSum, currentInd…
Write a Java function that takes a string as input and returns the count of vowels in the string.	``` public int countVowels(String str) { int count = 0; str = str.toLowerCase(); for (int i = 0; i < str.length(); i++) { char c = str.charAt(i); if (c == 'a' || c == 'e' || c == 'i' || c == 'o' || c == 'u') { count++; } } return count; }
You are given a list of integers representing the heights of buildings. Write a Java function that takes this list as input and returns the maximum number of buildings that can be seen from the left side of the list.	``` public int maxBuildingsVisible(int[] heights) { int maxVisible = 0; int maxSoFar = 0; for (int height : heights) { if (height > maxSoFar) { maxVisible++; maxSoFar = height; } } return maxVisible; }
Write a Java function that takes a list of strings as input and returns the longest common prefix among all the strings.	``` public String longestCommonPrefix(List<String> strings) { if (strings.isEmpty()) { return ""; } String prefix = strings.get(0); for (int i = 1; i < strings.size(); i++) { while (strings.get(i).indexOf(prefix) != 0) { prefix = prefix.substring(0, prefix.length() - 1); if (prefix.isEmpty()) { return ""; } } } return prefix; }
You are given a list of integers representing the scores of students in a class. Write a Java function that takes this list as input and returns a list containing the ranking of each student in descending order of their scores.	``` public List<Integer> rankStudents(List<Integer> scores) { List<Integer> ranks = new ArrayList<>(); List<Integer> sortedScores = new ArrayList<>(scores); Collections.sort(sortedScores, Collections.reverseOrder()); for (int score : scores) { ranks.add(sortedScores.indexOf(score) + 1); } return ranks; }
Develop a Java function that calculates the sum of the squares of all the elements in a given array of integers.	public class Main { public static int sumOfSquares(int[] arr) { int sum = 0; for (int i = 0; i < arr.length; i++) { sum += arr[i] * arr[i]; } return sum; } public static void main(String[] args) { int[] arr = {1, 2, 3, 4, 5}; System.out.println(sumOfSquares(arr)); } }
Write a Java function to check if a given string contains at least one uppercase letter.	public class Main { public static boolean hasUppercase(String str) { for (int i = 0; i < str.length(); i++) { if (Character.isUpperCase(str.charAt(i))) { return true; } } return false; } public static void main(String[] args) { System.out.println(hasUppercase("Hello World")); // returns true System.out.println(hasUppercase("hello world")); // returns false } }
Create a Java function that takes a string as input and returns the string with all vowels removed.	public class Main { public static String removeVowels(String str) { String result = ""; for (int i = 0; i < str.length(); i++) { char ch = str.charAt(i); if (!(ch == 'a' || ch == 'e' || ch == 'i' || ch == 'o' || ch == 'u' || ch == 'A' || ch == 'E' || ch == 'I' || ch == 'O' || ch == 'U')) { result += ch; } } return result; } public static void main(String[] args) { System.out.println(removeVowels(…
Develop a Java function that takes an array of integers and returns the count of elements that are greater than their next element.	public class Main { public static int countGreater(int[] arr) { int count = 0; for (int i = 0; i < arr.length - 1; i++) { if (arr[i] > arr[i + 1]) { count++; } } return count; } public static void main(String[] args) { int[] arr = {5, 3, 7, 2, 9}; System.out.println(countGreater(arr)); // returns 3 } }
Write a Java function to check if a given array of integers contains consecutive integers.	public class Main { public static boolean hasConsecutive(int[] arr) { java.util.Arrays.sort(arr); for (int i = 0; i < arr.length - 1; i++) { if (arr[i] + 1 != arr[i + 1]) { return false; } } return true; } public static void main(String[] args) { int[] arr = {1, 2, 3, 4, 5}; System.out.println(hasConsecutive(arr)); // returns true int[] arr2 = {1, 2, 4, 5}; System.out.println(hasConsecutive(arr2)…
Given a string, write a function that returns the string with all vowels removed.	```java public class Main { public static String removeVowels(String str) { StringBuilder sb = new StringBuilder(); for (int i = 0; i < str.length(); i++) { char c = str.charAt(i); if (c != 'a' && c != 'e' && c != 'i' && c != 'o' && c != 'u' && c != 'A' && c != 'E' && c != 'I' && c != 'O' && c != 'U') { sb.append(c); } } return sb.toString(); } }
Write a function that takes in a list of integers and returns the number of even numbers in the list.	```java public class Main { public static int countEvenNumbers(List<Integer> list) { int count = 0; for (int num : list) { if (num % 2 == 0) { count++; } } return count; } }
Write a function that takes in a list of strings and returns the longest string in the list.	```java public class Main { public static String longestString(List<String> list) { String longest = ""; for (String str : list) { if (str.length() > longest.length()) { longest = str; } } return longest; } }
Given a list of integers, write a function that returns the sum of all prime numbers in the list.	```java public class Main { public static boolean isPrime(int num) { if (num <= 1) { return false; } for (int i = 2; i * i <= num; i++) { if (num % i == 0) { return false; } } return true; } public static int sumOfPrimes(List<Integer> list) { int sum = 0; for (int num : list) { if (isPrime(num)) { sum += num; } } return sum; } }
Write a function that takes in a list of strings and returns a new list with all strings converted to uppercase.	```java public class Main { public static List<String> convertToUppercase(List<String> list) { List<String> uppercaseList = new ArrayList<>(); for (String str : list) { uppercaseList.add(str.toUpperCase()); } return uppercaseList; } }
Write a function that takes in a list of integers and returns the count of all the numbers that are divisible by 3.	```java public class Main { public static int countDivisibleByThree(List<Integer> numbers) { int count = 0; for (int num : numbers) { if (num % 3 == 0) { count++; } } return count; } }
Create a function that takes a string input and returns the count of all the vowels in the string.	```java public class Main { public static int countVowels(String str) { int count = 0; String vowels = "aeiouAEIOU"; for (char c : str.toCharArray()) { if (vowels.indexOf(c) != -1) { count++; } } return count; } }
You are given a list of strings and you need to write a function that returns the string with the most vowels.	```java public class Main { public static String findStringWithMostVowels(List<String> strings) { String maxVowelString = ""; int maxVowelCount = 0; for (String str : strings) { int vowelCount = countVowels(str); if (vowelCount > maxVowelCount) { maxVowelCount = vowelCount; maxVowelString = str; } } return maxVowelString; } }
Write a function that takes in a string input and returns true if the string is a palindrome, otherwise returns false.	```java public class Main { public static boolean isPalindrome(String str) { String reversed = new StringBuilder(str).reverse().toString(); return str.equals(reversed); } }
Create a function that takes a list of integers as input and returns the average of all the numbers in the list.	```java public class Main { public static double calculateAverage(List<Integer> numbers) { int sum = 0; for (int num : numbers) { sum += num; } return (double) sum / numbers.size(); } }
Create a class named 'Triangle' with attributes base and height. The class should have an area method that returns the area of the triangle and a isIsosceles method that returns true if the triangle is isosceles.	public class Triangle { private double base; private double height; public Triangle(double base, double height) { this.base = base; this.height = height; } public double area() { return 0.5 * base * height; } public boolean isIsosceles(double side1, double side2, double side3) { if (side1 == side2 || side1 == side3 || side2 == side3) { return true; } else { return false; } } }
Write a function that takes a list of integers as input and returns the count of even numbers in the list.	public int countEvenNumbers(List<Integer> numbers) { int count = 0; for (int number : numbers) { if (number % 2 == 0) { count++; } } return count; }
Create a function that takes a string as input and returns the string with all consonants removed. The function should be case-insensitive, i.e., it should remove both lowercase and uppercase consonants.	public String removeConsonants(String str) { String consonants = "bcdfghjklmnpqrstvwxyzBCDFGHJKLMNPQRSTVWXYZ"; String result = ""; for (char c : str.toCharArray()) { if (!consonants.contains(String.valueOf(c))) { result += c; } } return result; }
Write a function that takes a list of integers as input and returns the count of numbers greater than the average of the list.	public int countGreaterThanAverage(List<Integer> numbers) { int sum = 0; for (int number : numbers) { sum += number; } double average = (double) sum / numbers.size(); int count = 0; for (int number : numbers) { if (number > average) { count++; } } return count; }
Create a function that takes a list of strings as input and returns a new list with all strings in uppercase.	public List<String> toUpperCase(List<String> strings) { List<String> upperCaseStrings = new ArrayList<>(); for (String str : strings) { upperCaseStrings.add(str.toUpperCase()); } return upperCaseStrings; }
Write a function that counts the total number of digits in a given list of integers.	public static int countDigits(List<Integer> numbers) { int count = 0; for (int num : numbers) { count += String.valueOf(num).length(); } return count; }
Write a function that finds and returns the closest pair of integers in a given list that add up to a given target number.	public static int[] findClosestPair(List<Integer> numbers, int target) { int[] pair = new int[2]; int minDiff = Integer.MAX_VALUE; for (int i = 0; i < numbers.size(); i++) { for (int j = i + 1; j < numbers.size(); j++) { int sum = numbers.get(i) + numbers.get(j); int diff = Math.abs(sum - target); if (diff < minDiff) { minDiff = diff; pair[0] = numbers.get(i); pair[1] = numbers.get(j); } } } retu…
Create a function that takes a list of strings and returns the string with the maximum length.	public static String findLongestString(List<String> strings) { String longestString = ""; for (String str : strings) { if (str.length() > longestString.length()) { longestString = str; } } return longestString; }
Write a function that calculates the sum of all prime numbers in a given list of integers.	public static int sumOfPrimes(List<Integer> numbers) { int sum = 0; for (int num : numbers) { if (isPrime(num)) { sum += num; } } return sum; } public static boolean isPrime(int num) { if (num <= 1) { return false; } for (int i = 2; i * i <= num; i++) { if (num % i == 0) { return false; } } return true; }
Implement a function to sort a list of strings in descending order of their lengths.	public static List<String> sortByLength(List<String> strings) { strings.sort((s1, s2) -> s2.length() - s1.length()); return strings; }
Create a Java function to count the occurrences of all vowels in a given string.	```java public class Main { public static int countVowels(String str) { str = str.toLowerCase(); int count = 0; for (int i = 0; i < str.length(); i++) { char c = str.charAt(i); if (c == 'a' || c == 'e' || c == 'i' || c == 'o' || c == 'u') { count++; } } return count; } public static void main(String[] args) { String str = "Hello World"; System.out.println("Number of vowels: " + countVowels(str));…
Write a Java function to find the maximum difference between two elements in an array.	```java public class Main { public static int maxDifference(int[] arr) { if (arr.length < 2) { return 0; } int max = arr[0]; int min = arr[0]; for (int i = 1; i < arr.length; i++) { if (arr[i] > max) { max = arr[i]; } else if (arr[i] < min) { min = arr[i]; } } return max - min; } public static void main(String[] args) { int[] arr = {5, 10, 3, 15, 20}; System.out.println("Maximum difference: " + m…
Design a Java function that accepts an array of integers and returns true if the array contains at least one pair of identical adjacent elements, and false otherwise.	```java public class Main { public static boolean hasAdjacentDuplicates(int[] arr) { for (int i = 0; i < arr.length - 1; i++) { if (arr[i] == arr[i + 1]) { return true; } } return false; } public static void main(String[] args) { int[] arr = {1, 2, 3, 4, 5}; System.out.println("Has adjacent duplicates: " + hasAdjacentDuplicates(arr)); } }
Create a Java function to convert an integer into a binary string.	```java public class Main { public static String toBinaryString(int num) { return Integer.toBinaryString(num); } public static void main(String[] args) { int num = 10; System.out.println("Binary representation: " + toBinaryString(num)); } }
Write a Java function that takes a list of strings as input and returns the most frequently occurring string.	```java import java.util.HashMap; import java.util.Map; public class Main { public static String mostFrequentString(String[] arr) { if (arr.length == 0) { return null; } Map<String, Integer> freqMap = new HashMap<>(); for (String str : arr) { freqMap.put(str, freqMap.getOrDefault(str, 0) + 1); } String maxStr = arr[0]; int maxCount = 1; for (Map.Entry<String, Integer> entry : freqMap.entrySet()) …
Write a Java function that takes a string as an input and returns the string with all vowels removed.	public static String removeVowels(String str) { String vowels = "aeiouAEIOU"; String result = ""; for (int i = 0; i < str.length(); i++) { char c = str.charAt(i); if (vowels.indexOf(c) == -1) { result += c; } } return result; }
Write a Java function that takes an integer array as an input and returns the average of all the numbers in the array.	public static double calculateAverage(int[] arr) { int sum = 0; for (int i : arr) { sum += i; } return (double) sum / arr.length; }
Write a Java function that takes a string as an input and checks if the string is a perfect square of some integer.	public static boolean isPerfectSquare(String str) { int num = Integer.parseInt(str); int sqrt = (int) Math.sqrt(num); return sqrt * sqrt == num; }
Write a Java function that takes a string as an input and returns the longest prefix that is also a suffix.	public static String longestPrefixSuffix(String str) { for (int i = str.length() / 2; i >= 1; i--) { String prefix = str.substring(0, i); String suffix = str.substring(str.length() - i); if (prefix.equals(suffix)) { return prefix; } } return ""; }
Write a Java function that takes a string as an input and capitalizes the first letter of each word in the string.	public static String capitalizeWords(String str) { String[] words = str.split(" "); StringBuilder result = new StringBuilder(); for (String word : words) { result.append(word.substring(0, 1).toUpperCase()).append(word.substring(1)).append(" "); } return result.toString().trim(); }
Write a Java function to calculate the average of all the elements in a given array.	```java public static double calculateAverage(int[] arr) { int sum = 0; for (int i : arr) { sum += i; } return (double) sum / arr.length; }
Develop a Java program that takes a 2D array of characters as input and returns the count of all vowels in the array.	```java public static int countVowels(char[][] arr) { int count = 0; for (char[] row : arr) { for (char c : row) { c = Character.toLowerCase(c); if (c == 'a' || c == 'e' || c == 'i' || c == 'o' || c == 'u') { count++; } } } return count; }
Write a Java function that takes an array of strings as an input and returns the longest string in the array.	```java public static String findLongestString(String[] arr) { String longest = arr[0]; for (int i = 1; i < arr.length; i++) { if (arr[i].length() > longest.length()) { longest = arr[i]; } } return longest; }
Write a Java function to calculate the sum of all the diagonal elements in a given 2D array.	```java public static int sumDiagonalElements(int[][] arr) { int sum = 0; for (int i = 0; i < arr.length; i++) { sum += arr[i][i]; } return sum; }
Develop a Java program that takes an array of integers as input and returns true if the array contains a pair of duplicate elements, and false otherwise.	```java public static boolean hasDuplicates(int[] arr) { Set<Integer> set = new HashSet<>(); for (int i : arr) { if (!set.add(i)) { return true; } } return false; }
Write a function that takes a string as input and returns the string with all vowels removed.	public class Main { public static String removeVowels(String str) { str = str.replaceAll("[aeiouAEIOU]", ""); return str; } public static void main(String[] args) { System.out.println(removeVowels("Hello World")); } }
Create a function that takes an array of integers as input and returns the number of pairs of integers that have a difference of 1.	public class Main { public static int countPairsWithDiffOne(int[] arr) { int count = 0; for (int i = 0; i < arr.length; i++) { for (int j = i + 1; j < arr.length; j++) { if (Math.abs(arr[i] - arr[j]) == 1) { count++; } } } return count; } public static void main(String[] args) { int[] arr = {1, 2, 3, 4, 5}; System.out.println(countPairsWithDiffOne(arr)); } }
Write a function that takes a list of strings as input and returns the longest string in the list.	public class Main { public static String findLongestString(String[] strArr) { String longestStr = ""; for (String str : strArr) { if (str.length() > longestStr.length()) { longestStr = str; } } return longestStr; } public static void main(String[] args) { String[] strArr = {"apple", "banana", "cherry", "date"}; System.out.println(findLongestString(strArr)); } }
Create a function that takes a 2D array of integers as input and returns the sum of all elements in the array.	public class Main { public static int sum2DArray(int[][] arr) { int sum = 0; for (int i = 0; i < arr.length; i++) { for (int j = 0; j < arr[i].length; j++) { sum += arr[i][j]; } } return sum; } public static void main(String[] args) { int[][] arr = {{1, 2, 3}, {4, 5, 6}, {7, 8, 9}}; System.out.println(sum2DArray(arr)); } }
Write a function that takes a string as input and returns true if the string is a palindrome, and false otherwise.	public class Main { public static boolean isPalindrome(String str) { String reversedStr = new StringBuilder(str).reverse().toString(); return str.equals(reversedStr); } public static void main(String[] args) { System.out.println(isPalindrome("madam")); } }
Write a function to find the index of the first occurrence of a given character in a string.	```java public int findCharIndex(String str, char c) { for (int i = 0; i < str.length(); i++) { if (str.charAt(i) == c) { return i; } } return -1; }
Create a class named 'Triangle' with attributes base and height. The class should have an area method that returns the area of the triangle.	```java public class Triangle { private double base; private double height; public Triangle(double base, double height) { this.base = base; this.height = height; } public double area() { return 0.5 * base * height; } }
Write a Java function to count the number of digits in a given integer.	```java public int countDigits(int num) { int count = 0; while (num != 0) { num /= 10; count++; } return count; }
Write a Java function to check if a given string is a palindrome.	```java public boolean isPalindrome(String str) { int i = 0, j = str.length() - 1; while (i < j) { if (str.charAt(i) != str.charAt(j)) { return false; } i++; j--; } return true; }
Write a Java function to find the average of all the elements in a given array.	```java public double average(int[] arr) { int sum = 0; for (int i = 0; i < arr.length; i++) { sum += arr[i]; } return (double) sum / arr.length; }
Write a Java function that accepts a string input and returns the string reversed.	public String reverseString(String str) { String reversed = ""; for (int i = str.length() - 1; i >= 0; i--) { reversed += str.charAt(i); } return reversed; }
Write a function that takes in a list of integers as input and returns the number of odd numbers in the list.	```java public int countOddNumbers(List<Integer> numbers) { int count = 0; for (int num : numbers) { if (num % 2 != 0) { count++; } } return count; }
Implement a function that checks if a given matrix is symmetric or not. The function should return True if the matrix is symmetric and False otherwise.	```java public boolean isSymmetric(int[][] matrix) { int rows = matrix.length; int cols = matrix[0].length; for (int i = 0; i < rows; i++) { for (int j = 0; j < i; j++) { if (matrix[i][j] != matrix[j][i]) { return false; } } } return true; }
Write a function that takes in a string as input and returns the frequency of the most frequent character in the string.	```java public int maxFrequency(String s) { Map<Character, Integer> freqMap = new HashMap<>(); for (char c : s.toCharArray()) { freqMap.put(c, freqMap.getOrDefault(c, 0) + 1); } int maxFreq = 0; for (int freq : freqMap.values()) { maxFreq = Math.max(maxFreq, freq); } return maxFreq; }
Implement a function that takes in a list of strings as input and returns the longest string in the list.	```java public String longestString(List<String> strings) { String longest = ""; for (String s : strings) { if (s.length() > longest.length()) { longest = s; } } return longest; }
Write a function that takes in a list of integers as input and returns True if the list contains at least one pair of elements that have a difference of 5, and False otherwise.	```java public boolean hasDifferenceOfFive(List<Integer> numbers) { Set<Integer> numsSet = new HashSet<>(numbers); for (int num : numbers) { if (numsSet.contains(num + 5) || numsSet.contains(num - 5)) { return true; } } return false; }
Write a function to calculate the area of a rectangle with a given length and width.	public class Main { public static double calculateArea(double length, double width) { return length * width; } public static void main(String[] args) { double length = 5.0; double width = 3.0; System.out.println("The area of the rectangle is " + calculateArea(length, width)); } }
Implement a function that takes a string as an input and returns the count of vowels in the string.	public class Main { public static int countVowels(String str) { int count = 0; for (int i = 0; i < str.length(); i++) { char ch = str.charAt(i); if (ch == 'a' || ch == 'e' || ch == 'i' || ch == 'o' || ch == 'u' || ch == 'A' || ch == 'E' || ch == 'I' || ch == 'O' || ch == 'U') { count++; } } return count; } public static void main(String[] args) { String str = "Hello World"; System.out.println("Th…
Write a function that takes a list of integers as an input and returns the second largest number in the list.	import java.util.Arrays; public class Main { public static int findSecondLargest(int[] arr) { if (arr.length < 2) { throw new RuntimeException("List must have at least two elements"); } Arrays.sort(arr); return arr[arr.length - 2]; } public static void main(String[] args) { int[] arr = {12, 13, 1, 10, 34}; System.out.println("The second largest number in the list is " + findSecondLargest(arr)); }…
Implement a function that checks if a given string is a palindrome.	public class Main { public static boolean isPalindrome(String str) { int i = 0, j = str.length() - 1; while (i < j) { if (str.charAt(i) != str.charAt(j)) { return false; } i++; j--; } return true; } public static void main(String[] args) { String str = "madam"; if (isPalindrome(str)) { System.out.println(str + " is a palindrome"); } else { System.out.println(str + " is not a palindrome"); } } }
Write a function to calculate the factorial of a given positive integer.	public class Main { public static long calculateFactorial(int n) { if (n < 0) { throw new RuntimeException("Input must be a positive integer"); } long factorial = 1; for (int i = 1; i <= n; i++) { factorial *= i; } return factorial; } public static void main(String[] args) { int n = 5; System.out.println("The factorial of " + n + " is " + calculateFactorial(n)); } }
Design a function that takes a list of integers as input and returns the list with all even integers removed.	public class Main { public static List<Integer> removeEvenIntegers(List<Integer> integers) { integers.removeIf(n -> n % 2 == 0); return integers; } public static void main(String[] args) { List<Integer> integers = Arrays.asList(1, 2, 3, 4, 5, 6); List<Integer> result = removeEvenIntegers(integers); System.out.println(result); } }
Write a Java function, that takes two strings as input and returns the string that comes first alphabetically.	public class Main { public static String firstAlphabeticalString(String s1, String s2) { if(s1.compareTo(s2) < 0) { return s1; } else { return s2; } } public static void main(String[] args) { String s1 = "Hello"; String s2 = "World"; String result = firstAlphabeticalString(s1, s2); System.out.println(result); } }
Implement a Java function that takes a list of strings as input and returns the longest string in the list.	public class Main { public static String longestString(List<String> strings) { String longest = strings.get(0); for(String s: strings) { if(s.length() > longest.length()) { longest = s; } } return longest; } public static void main(String[] args) { List<String> strings = Arrays.asList("Hello", "World", "Programming", "Java"); String result = longestString(strings); System.out.println(result); } }
Write a Java function that takes a positive integer as input and returns the sum of its digits.	public class Main { public static int sumOfDigits(int n) { int sum = 0; while(n != 0) { sum += n % 10; n /= 10; } return sum; } public static void main(String[] args) { int n = 123; int result = sumOfDigits(n); System.out.println(result); } }
Design a Java function that takes a list of integers as input and returns the count of elements that are greater than the average of the list.	public class Main { public static int countGreaterThanAverage(List<Integer> integers) { int sum = 0; for(int n: integers) { sum += n; } double average = (double) sum / integers.size(); int count = 0; for(int n: integers) { if(n > average) { count++; } } return count; } public static void main(String[] args) { List<Integer> integers = Arrays.asList(1, 2, 3, 4, 5, 6); int result = countGreaterThanA…
Write a function that takes a list of strings as input and returns the string that appears most frequently.	```java public String mostFrequentString(List<String> strings) { Map<String, Integer> frequencyMap = new HashMap<>(); for (String str : strings) { frequencyMap.put(str, frequencyMap.getOrDefault(str, 0) + 1); } String mostFrequent = null; int maxFrequency = 0; for (Map.Entry<String, Integer> entry : frequencyMap.entrySet()) { if (entry.getValue() > maxFrequency) { maxFrequency = entry.getValue();…
Create a function that takes a list of integers as input and returns True if the list contains at least one element that is greater than 5, and False otherwise.	```java public boolean hasLargeNumber(List<Integer> numbers) { for (int num : numbers) { if (num > 5) { return true; } } return false; }
Write a function that takes a list of integers as input and returns a new list containing only the numbers that are even.	```java public List<Integer> getEvenNumbers(List<Integer> numbers) { List<Integer> evenNumbers = new ArrayList<>(); for (int num : numbers) { if (num % 2 == 0) { evenNumbers.add(num); } } return evenNumbers; }
Create a function that takes a list of strings as input and returns a new list containing only the strings that have a length greater than 5.	```java public List<String> getLongStrings(List<String> strings) { List<String> longStrings = new ArrayList<>(); for (String str : strings) { if (str.length() > 5) { longStrings.add(str); } } return longStrings; }
Write a function that takes a list of integers as input and returns the sum of all the numbers.	```java public int sumNumbers(List<Integer> numbers) { int sum = 0; for (int num : numbers) { sum += num; } return sum; }
You are given a string of parentheses. Write a function to determine whether the string is well-formed, i.e., every open parenthesis has a corresponding close parenthesis.	public boolean isWellFormed(String s) { Stack<Character> stack = new Stack<>(); for (char c : s.toCharArray()) { if (c == '(') { stack.push(c); } else if (c == ')') { if (stack.isEmpty()) { return false; } stack.pop(); } } return stack.isEmpty(); }
Write a function to find the longest common prefix among a list of strings.	public String longestCommonPrefix(String[] strs) { if (strs.length == 0) return ""; String prefix = strs[0]; for (int i = 1; i < strs.length; i++) { while (strs[i].indexOf(prefix) != 0) { prefix = prefix.substring(0, prefix.length() - 1); if (prefix.isEmpty()) return ""; } } return prefix; }
Design a function that takes a list of integers as input and returns the count of triplets that sum up to zero.	public int countTriplets(int[] nums) { Arrays.sort(nums); int count = 0; for (int i = 0; i < nums.length - 2; i++) { int j = i + 1; int k = nums.length - 1; while (j < k) { int sum = nums[i] + nums[j] + nums[k]; if (sum < 0) { j++; } else if (sum > 0) { k--; } else { count++; j++; k--; } } } return count; }
Write a function to find the maximum sum of a subarray within a one-dimensional array of numbers.	public int maxSubArray(int[] nums) { int maxSoFar = nums[0]; int maxEndingHere = nums[0]; for (int i = 1; i < nums.length; i++) { maxEndingHere = Math.max(nums[i], maxEndingHere + nums[i]); maxSoFar = Math.max(maxSoFar, maxEndingHere); } return maxSoFar; }
You are given a binary tree where each node has an integer value. Write a function to find the path with the maximum sum.	public int maxPathSum(TreeNode root) { int[] maxSum = new int[] {Integer.MIN_VALUE}; maxPathSumHelper(root, maxSum); return maxSum[0]; } public int maxPathSumHelper(TreeNode node, int[] maxSum) { if (node == null) { return 0; } int left = Math.max(0, maxPathSumHelper(node.left, maxSum)); int right = Math.max(0, maxPathSumHelper(node.right, maxSum)); maxSum[0] = Math.max(maxSum[0], left + right + …
Write a Java function that takes a string as input and returns the count of alphanumeric characters in the string.	public static int countAlphanumeric(String str) { int count = 0; for(int i = 0; i < str.length(); i++) { char ch = str.charAt(i); if(Character.isLetterOrDigit(ch)) { count++; } } return count; }
Write a Java function 'checkPalindrome' that takes a string ('word') as input and returns true if the string is a palindrome, false otherwise.	public static boolean checkPalindrome(String word) { String reversedWord = new StringBuilder(word).reverse().toString(); return word.equalsIgnoreCase(reversedWord); }
Write a Java function that takes an array of integers as input and returns the count of even numbers in the array.	public static int countEvenNumbers(int[] arr) { int count = 0; for(int num : arr) { if(num % 2 == 0) { count++; } } return count; }
Write a Java function 'findSmallestNumber' that takes an array of integers as input and returns the smallest number in the array.	public static int findSmallestNumber(int[] arr) { int smallest = arr[0]; for(int i = 1; i < arr.length; i++) { if(arr[i] < smallest) { smallest = arr[i]; } } return smallest; }
Write a Java function that takes a string as input and returns the reversed string.	public static String reverseString(String str) { StringBuilder sb = new StringBuilder(str); return sb.reverse().toString(); }
Write a function to find the longest word in a given sentence.	public class Main { public static String longestWord(String sentence) { String[] words = sentence.split(" "); String longest = ""; for (String word : words) { if (word.length() > longest.length()) { longest = word; } } return longest; } public static void main(String[] args) { System.out.println(longestWord("Hello world this is a test")); } }
Implement a Java function to check if a given word is a palindrome.	public class Main { public static boolean isPalindrome(String word) { String reversed = new StringBuilder(word).reverse().toString(); return word.equals(reversed); } public static void main(String[] args) { System.out.println(isPalindrome("madam")); } }
Write a Java function to count the number of occurrences of a given substring in a string.	public class Main { public static int countSubstring(String str, String sub) { int count = 0; int idx = 0; while ((idx = str.indexOf(sub, idx)) != -1) { count++; idx++; } return count; } public static void main(String[] args) { System.out.println(countSubstring("hello hello hello", "hello")); } }
Implement a Java function to check if a given number is an Armstrong number.	public class Main { public static boolean isArmstrong(int n) { int sum = 0; int original = n; while (n > 0) { int digit = n % 10; sum = sum + (int) Math.pow(digit, 3); n = n / 10; } return sum == original; } public static void main(String[] args) { System.out.println(isArmstrong(371)); } }
Write a Java function to find the maximum product of three numbers in a given array.	public class Main { public static int maxProduct(int[] arr) { Arrays.sort(arr); int n = arr.length; return Math.max(arr[0] * arr[1] * arr[n-1], arr[n-1] * arr[n-2] * arr[n-3]); } public static void main(String[] args) { int[] arr = {1, 2, 3, 4, 5}; System.out.println(maxProduct(arr)); } }
Write a function that takes a string as input and returns the string with all characters in uppercase, except for the characters at even indices which should be in lowercase.	```java public static String toggleCase(String s) { StringBuilder result = new StringBuilder(); for (int i = 0; i < s.length(); i++) { char c = s.charAt(i); if (i % 2 == 0) { result.append(Character.toLowerCase(c)); } else { result.append(Character.toUpperCase(c)); } } return result.toString(); }
Create a function that takes a list of strings as input and returns the string that appears most frequently in the list.	```java import java.util.HashMap; import java.util.Map; public static String mostFrequentString(List<String> strings) { Map<String, Integer> frequencyMap = new HashMap<>(); for (String s : strings) { frequencyMap.put(s, frequencyMap.getOrDefault(s, 0) + 1); } String mostFrequent = null; int maxFrequency = 0; for (Map.Entry<String, Integer> entry : frequencyMap.entrySet()) { if (entry.getValue() >…
Implement a function that takes a list of integers as input and returns the sum of the squares of all the numbers in the list.	```java public static int sumOfSquares(List<Integer> numbers) { int sum = 0; for (int num : numbers) { sum += num * num; } return sum; }
Write a function that takes a list of strings as input and returns a new list that contains only the strings that have a length greater than 5.	```java public static List<String> filterLongStrings(List<String> strings) { List<String> result = new ArrayList<>(); for (String s : strings) { if (s.length() > 5) { result.add(s); } } return result; }
Create a function that takes a dictionary as input and returns the key that has the maximum value.	```java import java.util.HashMap; import java.util.Map; public static String getMaxKey(Map<String, Integer> map) { String maxKey = null; int maxValue = Integer.MIN_VALUE; for (Map.Entry<String, Integer> entry : map.entrySet()) { if (entry.getValue() > maxValue) { maxValue = entry.getValue(); maxKey = entry.getKey(); } } return maxKey; }
Write a Java function that takes a string as input and returns the string with all vowels removed.	public String removeVowels(String str) { return str.replaceAll("[aeiouAEIOU]", ""); }
Write a Java function to check if a given string is a palindrome.	public boolean isPalindrome(String str) { String reversed = new StringBuilder(str).reverse().toString(); return str.equalsIgnoreCase(reversed); }
Write a Java function that takes a list of integers as input and returns a new list with all duplicate elements removed.	import java.util.ArrayList; import java.util.LinkedHashSet; public ArrayList<Integer> removeDuplicates(ArrayList<Integer> list) { LinkedHashSet<Integer> set = new LinkedHashSet<>(list); return new ArrayList<>(set); }
Write a Java function to find the first non-repeating character in a given string.	import java.util.LinkedHashMap; import java.util.Map; public char firstNonRepeatingChar(String str) { Map<Character, Integer> charCount = new LinkedHashMap<>(); for (char c : str.toCharArray()) { charCount.put(c, charCount.getOrDefault(c, 0) + 1); } for (Map.Entry<Character, Integer> entry : charCount.entrySet()) { if (entry.getValue() == 1) { return entry.getKey(); } } return '\0'; }
Write a Java function that takes a list of strings as input and returns a new list with all strings sorted in alphabetical order.	import java.util.ArrayList; import java.util.Collections; public ArrayList<String> sortStrings(ArrayList<String> list) { Collections.sort(list); return list; }
Write a function that takes a list of integers and returns the count of numbers divisible by 3.	public int countDivisibleByThree(int[] list) { int count = 0; for (int num : list) { if (num % 3 == 0) { count++; } } return count; }
Write a function to find the longest common prefix among a list of strings, without using any built-in string functions.	public String findLongestCommonPrefix(String[] list) { if (list.length == 0) { return ""; } String prefix = list[0]; for (int i = 1; i < list.length; i++) { while (list[i].indexOf(prefix) != 0) { prefix = prefix.substring(0, prefix.length() - 1); if (prefix.isEmpty()) { return ""; } } } return prefix; }
Create a program that asks the user to input a number and then checks if the number is a prime number. If it is, the program should return 'Yes', otherwise it should return 'No'.	import java.util.Scanner; public String isPrime() { Scanner scanner = new Scanner(System.in); System.out.println("Enter a number: "); int num = scanner.nextInt(); if (num <= 1) { return "No"; } for (int i = 2; i * i <= num; i++) { if (num % i == 0) { return "No"; } } return "Yes"; }
Write a function to find the number of occurrences of a specified character in a given string.	public int countCharOccurrences(String str, char ch) { int count = 0; for (int i = 0; i < str.length(); i++) { if (str.charAt(i) == ch) { count++; } } return count; }
Create a function that takes a string and returns the reversed string.	public String reverseString(String str) { StringBuilder reversed = new StringBuilder(); for (int i = str.length() - 1; i >= 0; i--) { reversed.append(str.charAt(i)); } return reversed.toString(); }
Write a function that takes a string as input and returns the string with all consonants removed.	```java public class Main { public static void main(String[] args) { System.out.println(removeConsonants("Hello World")); } public static String removeConsonants(String str) { String vowels = "aeiouAEIOU"; String result = ""; for (int i = 0; i < str.length(); i++) { if (vowels.indexOf(str.charAt(i)) != -1) { result += str.charAt(i); } } return result; } }
Create a program that asks the user to input two integers and then checks if they have the same digits. If they do, the program should print 'Yes', otherwise it should print 'No'.	```java import java.util.Arrays; import java.util.Scanner; public class Main { public static void main(String[] args) { Scanner scanner = new Scanner(System.in); System.out.println("Enter the first integer:"); int num1 = scanner.nextInt(); System.out.println("Enter the second integer:"); int num2 = scanner.nextInt(); if (haveSameDigits(num1, num2)) { System.out.println("Yes"); } else { System.out…
Write a function that takes a list of integers as input and returns the count of even numbers in the list.	```java public class Main { public static void main(String[] args) { int[] nums = {1, 2, 3, 4, 5, 6}; System.out.println(countEvenNumbers(nums)); } public static int countEvenNumbers(int[] nums) { int count = 0; for (int num : nums) { if (num % 2 == 0) { count++; } } return count; } }
Write a function that takes a string as input and returns the count of words with an even length.	```java public class Main { public static void main(String[] args) { System.out.println(countEvenLengthWords("Hello World Java is fun")); } public static int countEvenLengthWords(String str) { String[] words = str.split(" "); int count = 0; for (String word : words) { if (word.length() % 2 == 0) { count++; } } return count; } }
Create a program that asks the user to input a sentence and then checks if the sentence contains any words with three consecutive vowels. If it does, the program should print 'Yes', otherwise it should print 'No'.	```java import java.util.Scanner; public class Main { public static void main(String[] args) { Scanner scanner = new Scanner(System.in); System.out.println("Enter a sentence:"); String sentence = scanner.nextLine(); if (hasThreeConsecutiveVowels(sentence)) { System.out.println("Yes"); } else { System.out.println("No"); } } public static boolean hasThreeConsecutiveVowels(String str) { String vowel…
Write a function to find the longest common prefix in an array of strings.	```java public static String longestCommonPrefix(String[] strs) { if(strs == null || strs.length == 0) return ""; String prefix = strs[0]; for(int i = 1; i < strs.length; i++) { while(strs[i].indexOf(prefix) != 0) { prefix = prefix.substring(0, prefix.length() - 1); if(prefix.isEmpty()) return ""; } } return prefix; }
You are given an array of integers. Write a function to find the first duplicate in the array.	```java public static int firstDuplicate(int[] nums) { Map<Integer, Integer> map = new HashMap<>(); for(int i = 0; i < nums.length; i++) { if(map.containsKey(nums[i])) { return nums[i]; } map.put(nums[i], i); } return -1; }
Write a function to convert a given binary number to decimal.	```java public static int binaryToDecimal(String binary) { int decimal = 0; int power = 0; for(int i = binary.length() - 1; i >= 0; i--) { decimal += (binary.charAt(i) - '0') * Math.pow(2, power); power++; } return decimal; }
You are given a 2D array of characters. Write a function to find the number of islands in the given grid, where an island is a group of 1's connected horizontally or vertically.	```java public static int numIslands(char[][] grid) { int count = 0; for(int i = 0; i < grid.length; i++) { for(int j = 0; j < grid[0].length; j++) { if(grid[i][j] == '1') { dfs(grid, i, j); count++; } } } return count; } public static void dfs(char[][] grid, int i, int j) { if(i < 0 || j < 0 || i >= grid.length || j >= grid[0].length || grid[i][j] != '1') { return; } grid[i][j] = '#'; dfs(grid, …
Write a function to find the maximum sum of a subarray within a given array of integers.	```java public static int maxSubArraySum(int[] nums) { int maxSum = nums[0]; int currentSum = nums[0]; for(int i = 1; i < nums.length; i++) { currentSum = Math.max(nums[i], currentSum + nums[i]); maxSum = Math.max(maxSum, currentSum); } return maxSum; }
Write a function that takes a string as input and checks if it's a palindrome, returning true if it is and false otherwise.	```java public boolean isPalindrome(String s) { int i = 0, j = s.length() - 1; while (i < j) { if (s.charAt(i) != s.charAt(j)) return false; i++; j--; } return true; }
Write a function that takes a list of integers as input and returns the count of pairs with a difference of 1.	```java public int countPairsWithDifferenceOne(List<Integer> list) { int count = 0; for (int i = 0; i < list.size(); i++) { for (int j = i + 1; j < list.size(); j++) { if (Math.abs(list.get(i) - list.get(j)) == 1) count++; } } return count; }
Write a function that takes a list of integers as input and returns the count of numbers greater than or equal to 5.	```java public int countNumbersGreaterThanOrEqualToFive(List<Integer> list) { int count = 0; for (int num : list) { if (num >= 5) count++; } return count; }
Write a function that takes two strings as input and checks if they are anagrams of each other, returning true if they are and false otherwise.	```java public boolean areAnagrams(String s1, String s2) { if (s1.length() != s2.length()) return false; char[] c1 = s1.toCharArray(); char[] c2 = s2.toCharArray(); Arrays.sort(c1); Arrays.sort(c2); return Arrays.equals(c1, c2); }
Write a function that takes a list of strings as input and returns the longest string in the list.	```java public String findLongestString(List<String> list) { String longest = ""; for (String s : list) { if (s.length() > longest.length()) longest = s; } return longest; }
Write a function that takes a list of strings as an input and returns a new list with all strings in uppercase.	```java import java.util.*; public class Main { public static List<String> uppercaseStrings(List<String> strings) { List<String> uppercaseStrings = new ArrayList<>(); for (String str : strings) { uppercaseStrings.add(str.toUpperCase()); } return uppercaseStrings; } }
Write a function that takes a list of integers as an input and returns True if the list is in ascending order, False otherwise.	```java import java.util.*; public class Main { public static boolean isAscendingOrder(List<Integer> numbers) { for (int i = 0; i < numbers.size() - 1; i++) { if (numbers.get(i) > numbers.get(i + 1)) { return false; } } return true; } }
Write a function that takes a string as an input and returns the string with all occurrences of a specific character removed.	```java public class Main { public static String removeCharacter(String str, char ch) { String newStr = ""; for (int i = 0; i < str.length(); i++) { if (str.charAt(i) != ch) { newStr += str.charAt(i); } } return newStr; } }
Write a function that takes a list of integers as an input and returns the count of all prime numbers in the list.	```java import java.util.*; public class Main { public static boolean isPrime(int num) { if (num <= 1) { return false; } for (int i = 2; i <= Math.sqrt(num); i++) { if (num % i == 0) { return false; } } return true; } public static int countPrimeNumbers(List<Integer> numbers) { int count = 0; for (int num : numbers) { if (isPrime(num)) { count++; } } return count; } }
Write a function that takes a list of strings as an input and returns the longest string in the list.	```java import java.util.*; public class Main { public static String longestString(List<String> strings) { String longestStr = ""; for (String str : strings) { if (str.length() > longestStr.length()) { longestStr = str; } } return longestStr; } }
Create a function 'count_pairs' that takes two arrays as input and returns the count of pairs having the same elements in the same order.	public int count_pairs(int[] arr1, int[] arr2) { int count = 0; for (int i = 0; i < arr1.length; i++) { if (arr1[i] == arr2[i]) { count++; } } return count; }
Write a function to calculate the sum of all digits in a given number.	public int sum_digits(int n) { int sum = 0; while (n != 0) { sum += n % 10; n /= 10; } return sum; }
Create a function 'has_duplicates' that takes an array as input and returns true if the array contains any duplicate elements, false otherwise.	public boolean has_duplicates(int[] arr) { for (int i = 0; i < arr.length; i++) { for (int j = i + 1; j < arr.length; j++) { if (arr[i] == arr[j]) { return true; } } } return false; }
Write a function 'is_vowel' that takes a character as input and returns true if the character is a vowel, false otherwise.	public boolean is_vowel(char c) { c = Character.toLowerCase(c); if (c == 'a' || c == 'e' || c == 'i' || c == 'o' || c == 'u') { return true; } return false; }
Create a function 'palindrome_check' that takes a string as input and returns true if the string is a palindrome, false otherwise.	public boolean palindrome_check(String str) { int i = 0, j = str.length() - 1; while (i < j) { if (str.charAt(i) != str.charAt(j)) { return false; } i++; j--; } return true; }
Write a Java function that accepts a string input from the user and returns the string with all vowels removed.	public static String removeVowels(String input) { String vowels = "aeiouAEIOU"; StringBuilder output = new StringBuilder(); for (int i = 0; i < input.length(); i++) { if (!vowels.contains(String.valueOf(input.charAt(i)))) { output.append(input.charAt(i)); } } return output.toString(); }
Develop a Java function that takes an array of integers as input and returns the sum of all the even numbers in the array.	public static int sumOfEvenNumbers(int[] array) { int sum = 0; for (int i = 0; i < array.length; i++) { if (array[i] % 2 == 0) { sum += array[i]; } } return sum; }
Write a Java function that takes a string input from the user and returns true if the string is a palindrome, false otherwise.	public static boolean isPalindrome(String input) { String reversed = new StringBuilder(input).reverse().toString(); return input.equals(reversed); }
You are given an array of integers and you need to write a Java function that returns the number of pairs of adjacent elements that have the same value.	public static int countAdjacentDuplicates(int[] array) { int count = 0; for (int i = 1; i < array.length; i++) { if (array[i] == array[i - 1]) { count++; } } return count; }
Develop a Java function that takes an array of characters as input and returns the most frequently occurring character in the array.	public static char mostFrequentCharacter(char[] array) { Map<Character, Integer> frequencyMap = new HashMap<>(); for (char c : array) { frequencyMap.put(c, frequencyMap.getOrDefault(c, 0) + 1); } char mostFrequent = array[0]; int maxFrequency = frequencyMap.get(mostFrequent); for (Map.Entry<Character, Integer> entry : frequencyMap.entrySet()) { if (entry.getValue() > maxFrequency) { mostFrequent …
Write a Java function that takes a string as input and returns True if the string starts with a vowel, False otherwise.	```java public boolean startsWithVowel(String str) { String lowerCase = str.toLowerCase(); char firstChar = lowerCase.charAt(0); return (firstChar == 'a' || firstChar == 'e' || firstChar == 'i' || firstChar == 'o' || firstChar == 'u'); }
Create a class called Circle with an attribute radius. The class should have methods to calculate the area and circumference.	```java public class Circle { private double radius; public Circle(double radius) { this.radius = radius; } public double calculateArea() { return Math.PI * radius * radius; } public double calculateCircumference() { return 2 * Math.PI * radius; } }
Write a Java function that takes a list of integers as input and returns the sum of all even numbers in the list.	```java public int sumOfEvenNumbers(List<Integer> list) { int sum = 0; for (int num : list) { if (num % 2 == 0) { sum += num; } } return sum; }
Write a Java function that takes two strings as input and returns True if the strings are anagrams of each other, False otherwise.	```java public boolean areAnagrams(String str1, String str2) { if (str1.length() != str2.length()) { return false; } char[] charArray1 = str1.toLowerCase().toCharArray(); char[] charArray2 = str2.toLowerCase().toCharArray(); Arrays.sort(charArray1); Arrays.sort(charArray2); return Arrays.equals(charArray1, charArray2); }
Write a Java function that takes a list of strings as input and returns the longest string in the list.	```java public String longestString(List<String> list) { String longest = ""; for (String str : list) { if (str.length() > longest.length()) { longest = str; } } return longest; }
Write a Java function to count the frequency of each digit in a given number.	public class DigitCounter { public static void countDigits(int num) { int[] count = new int[10]; while (num > 0) { count[num % 10]++; num = num / 10; } for (int i = 0; i < 10; i++) { if (count[i] > 0) { System.out.println("Digit " + i + " appears " + count[i] + " times."); } } } public static void main(String[] args) { countDigits(123456789); } }
Implement a Java function to find the first duplicate element in a given array of integers.	public class FirstDuplicate { public static int firstDuplicate(int[] arr) { int duplicate = -1; for (int i = 0; i < arr.length; i++) { for (int j = i + 1; j < arr.length; j++) { if (arr[i] == arr[j]) { duplicate = arr[i]; return duplicate; } } } return duplicate; } public static void main(String[] args) { int[] arr = { 2, 5, 3, 5, 4 }; System.out.println("The first duplicate element is " + firstD…
Write a Java function to reverse each word in a given string while keeping the order of words intact.	public class WordReverser { public static String reverseWords(String str) { String[] words = str.split(" "); StringBuilder reversedStr = new StringBuilder(); for (String word : words) { StringBuilder reversedWord = new StringBuilder(word).reverse(); reversedStr.append(reversedWord).append(" "); } return reversedStr.toString().trim(); } public static void main(String[] args) { System.out.println(r…
Implement a Java function to check if a given string is a palindrome, ignoring case and non-alphanumeric characters.	public class PalindromeChecker { public static boolean isPalindrome(String str) { str = str.replaceAll("[^a-zA-Z0-9]", "").toLowerCase(); int start = 0; int end = str.length() - 1; while (start < end) { if (str.charAt(start) != str.charAt(end)) { return false; } start++; end--; } return true; } public static void main(String[] args) { System.out.println(isPalindrome("A man, a plan, a canal: Panam…
Write a Java function to find the maximum subarray sum in a given array of integers.	public class MaxSubarraySum { public static int maxSubarraySum(int[] arr) { int maxSoFar = arr[0]; int maxEndingHere = arr[0]; for (int i = 1; i < arr.length; i++) { maxEndingHere = Math.max(arr[i], maxEndingHere + arr[i]); maxSoFar = Math.max(maxSoFar, maxEndingHere); } return maxSoFar; } public static void main(String[] args) { int[] arr = { -2, -3, 4, -1, -2, 1, 5, -3 }; System.out.println("Th…
Write a function that removes all duplicate elements from a given list of integers.	public static List<Integer> removeDuplicates(List<Integer> numbers) { LinkedHashSet<Integer> set = new LinkedHashSet<>(numbers); return new ArrayList<>(set); }
Design a function that takes a list of strings as input and returns the total count of vowels in all strings.	public static int countVowels(List<String> strings) { int count = 0; for (String str : strings) { for (char c : str.toLowerCase().toCharArray()) { if (c == 'a' || c == 'e' || c == 'i' || c == 'o' || c == 'u') { count++; } } } return count; }
Create a function that takes a map of words with their frequencies as input and returns a string with the most frequent word.	public static String mostFrequentWord(Map<String, Integer> wordFrequency) { String mostFrequent = ""; int maxFrequency = 0; for (Map.Entry<String, Integer> entry : wordFrequency.entrySet()) { if (entry.getValue() > maxFrequency) { maxFrequency = entry.getValue(); mostFrequent = entry.getKey(); } } return mostFrequent; }
Write a function that takes a list of integers as input and returns a list of integers that are greater than the average of the list.	public static List<Integer> greaterThanAverage(List<Integer> numbers) { double average = numbers.stream().mapToDouble(i -> i).average().getAsDouble(); return numbers.stream().filter(i -> i > average).collect(Collectors.toList()); }
Design a function that takes a string as input and returns the string with all letters converted to lowercase and all non-alphabetic characters removed.	public static String processString(String str) { return str.replaceAll("[^a-zA-Z]", "").toLowerCase(); }
Write a Java program that calculates the sum of all even numbers in a given array of integers.	public class Main { public static int sumEvenNumbers(int[] arr) { int sum = 0; for (int num : arr) { if (num % 2 == 0) { sum += num; } } return sum; } public static void main(String[] args) { int[] arr = {1, 2, 3, 4, 5, 6}; System.out.println(sumEvenNumbers(arr)); } }
Create a Java function that takes a string as input and returns the string with all vowels removed.	public class Main { public static String removeVowels(String str) { StringBuilder result = new StringBuilder(); for (char c : str.toCharArray()) { if (!isVowel(c)) { result.append(c); } } return result.toString(); } public static boolean isVowel(char c) { c = Character.toLowerCase(c); return c == 'a' || c == 'e' || c == 'i' || c == 'o' || c == 'u'; } public static void main(String[] args) { Strin…
Write a Java program that prints the first n Fibonacci numbers, where n is a given input.	public class Main { public static void printFibonacci(int n) { int num1 = 0, num2 = 1; for (int i = 0; i < n; i++) { System.out.print(num1 + " "); int sum = num1 + num2; num1 = num2; num2 = sum; } } public static void main(String[] args) { int n = 10; printFibonacci(n); } }
Implement a Java function that takes a list of integers as input and returns true if the list contains a pair of numbers that add up to a given target sum, false otherwise.	public class Main { public static boolean hasPairWithSum(int[] arr, int targetSum) { Set<Integer> set = new HashSet<>(); for (int num : arr) { if (set.contains(targetSum - num)) { return true; } set.add(num); } return false; } public static void main(String[] args) { int[] arr = {1, 2, 3, 4, 5}; int targetSum = 7; System.out.println(hasPairWithSum(arr, targetSum)); } }
Create a Java function that takes a string as input and returns the string with all occurrences of a given substring replaced with another substring.	public class Main { public static String replaceSubstring(String str, String oldSubstr, String newSubstr) { return str.replace(oldSubstr, newSubstr); } public static void main(String[] args) { String str = "Hello World!"; String oldSubstr = "World"; String newSubstr = "Java"; System.out.println(replaceSubstring(str, oldSubstr, newSubstr)); } }
Write a function `isVowel` that takes a character as an input and returns true if the character is a vowel, false otherwise.	```java public boolean isVowel(char c) { c = Character.toLowerCase(c); return c == 'a' || c == 'e' || c == 'i' || c == 'o' || c == 'u'; }
Write a function `findLeastCommonMultiple` that takes two integers as inputs and returns their least common multiple (LCM).	```java public int findLeastCommonMultiple(int a, int b) { int max = Math.max(a, b); while (true) { if (max % a == 0 && max % b == 0) { return max; } max++; } }
Write a function `stringReverse` that takes a string as an input and returns the reversed string.	```java public String stringReverse(String str) { StringBuilder reversedStr = new StringBuilder(); for (int i = str.length() - 1; i >= 0; i--) { reversedStr.append(str.charAt(i)); } return reversedStr.toString(); }
Write a function `countSubstrings` that takes a string as an input and returns the count of all substrings in the string.	```java public int countSubstrings(String str) { int count = 0; for (int i = 0; i < str.length(); i++) { for (int j = i + 1; j <= str.length(); j++) { count++; } } return count; }
Write a function `chkPrime` that takes an integer as an input and returns true if the number is prime, false otherwise.	```java public boolean chkPrime(int n) { if (n <= 1) { return false; } for (int i = 2; i <= Math.sqrt(n); i++) { if (n % i == 0) { return false; } } return true; }
Write a Java function that takes a string as an input and returns True if the string contains at least three vowels, False otherwise.	```java public boolean hasThreeVowels(String str) { int count = 0; for (int i = 0; i < str.length(); i++) { char ch = str.charAt(i); if (ch == 'a' || ch == 'e' || ch == 'i' || ch == 'o' || ch == 'u' || ch == 'A' || ch == 'E' || ch == 'I' || ch == 'O' || ch == 'U') { count++; if (count >= 3) { return true; } } } return false; }
Write a Java function that takes a list of strings as an input and returns a new list that contains only the strings that start with an uppercase letter.	```java import java.util.ArrayList; import java.util.List; public List<String> filterUpperStrings(List<String> strs) { List<String> result = new ArrayList<>(); for (String str : strs) { char ch = str.charAt(0); if (Character.isUpperCase(ch)) { result.add(str); } } return result; }
Write a Java function that accepts a list of integers and returns True if the list contains at least one prime number, False otherwise.	```java public boolean hasPrimeNumber(List<Integer> nums) { for (Integer num : nums) { if (isPrime(num)) { return true; } } return false; } public boolean isPrime(int n) { if (n <= 1) { return false; } for (int i = 2; i * i <= n; i++) { if (n % i == 0) { return false; } } return true; }
Write a Java function that takes an integer as an input and returns the sum of all its digits.	```java public int sumDigits(int num) { int sum = 0; while (num != 0) { sum += num % 10; num /= 10; } return sum; }
You are given a list of strings where each string represents a name. Write a Java function that takes this list as an input and returns a new list that contains only the names that have more than one word.	```java import java.util.ArrayList; import java.util.List; public List<String> filterMultiWordNames(List<String> names) { List<String> result = new ArrayList<>(); for (String name : names) { if (name.split(" ").length > 1) { result.add(name); } } return result; }
Write a Java function that takes a string as input and returns the string in uppercase.	public String toUpper(String str) { return str.toUpperCase(); }
Write a Java function that takes a list of strings as input and returns the string with the maximum length.	import java.util.*; public String maxLengthString(List<String> strings) { if (strings == null || strings.isEmpty()) { return null; } String maxLengthString = strings.get(0); for (String str : strings) { if (str.length() > maxLengthString.length()) { maxLengthString = str; } } return maxLengthString; }
Write a Java function that takes a list of integers as input and returns true if the list contains a 3 or a 5, otherwise false.	public boolean containsThreeOrFive(List<Integer> numbers) { for (Integer num : numbers) { if (num == 3 || num == 5) { return true; } } return false; }
Create a Java function to find the sum of digits of a given integer.	public int sumOfDigits(int num) { int sum = 0; while (num > 0) { sum += num % 10; num /= 10; } return sum; }
Write a Java function that takes a list of integers as input and returns a new list containing only the even numbers from the input list.	import java.util.*; public List<Integer> getEvenNumbers(List<Integer> numbers) { List<Integer> evenNumbers = new ArrayList<>(); for (Integer num : numbers) { if (num % 2 == 0) { evenNumbers.add(num); } } return evenNumbers; }
Write a function that takes a string as input and returns True if the string contains at least one vowel, and False otherwise.	```java public boolean hasVowel(String str) { String vowels = "aeiou"; for (int i = 0; i < str.length(); i++) { if (vowels.indexOf(Character.toLowerCase(str.charAt(i))) != -1) { return true; } } return false; }
Write a function that takes a list of strings as input and returns the longest string in the list. If the list is empty, return an empty string.	```java public String longestString(List<String> strs) { if (strs.isEmpty()) { return ""; } String longest = strs.get(0); for (int i = 1; i < strs.size(); i++) { if (strs.get(i).length() > longest.length()) { longest = strs.get(i); } } return longest; }
Implement a Stack class using a list. The class should have the following methods: push, pop, and peek. The push method should add an element to the top of the stack, the pop method should remove an element from the top of the stack, and the peek method should return the top element of the stack without removing it.	```java import java.util.ArrayList; import java.util.List; public class Stack { private List<Object> elements; public Stack() { elements = new ArrayList<>(); } public void push(Object element) { elements.add(element); } public Object pop() { if (elements.isEmpty()) { return null; } return elements.remove(elements.size() - 1); } public Object peek() { if (elements.isEmpty()) { return null; } retur…
Write a function that takes a list of integers as input and returns the count of elements that are greater than the average of the list. If the list is empty, return 0.	```java public int countGreaterThanAverage(List<Integer> nums) { if (nums.isEmpty()) { return 0; } int sum = 0; for (int num : nums) { sum += num; } double average = (double) sum / nums.size(); int count = 0; for (int num : nums) { if (num > average) { count++; } } return count; }
Write a function that takes a list of strings as input and returns the count of strings that contain exactly three characters. If the list is empty, return 0.	```java public int countThreeCharStrings(List<String> strs) { int count = 0; for (String str : strs) { if (str.length() == 3) { count++; } } return count; }
Write a Java function to compute the sum of squares of all elements in a given list of integers.	```java public int sumOfSquares(List<Integer> list) { int sum = 0; for (int num : list) { sum += num * num; } return sum; }
Write a Java function to count the number of vowels in a given string.	```java public int countVowels(String str) { int count = 0; for (char c : str.toLowerCase().toCharArray()) { if (c == 'a' || c == 'e' || c == 'i' || c == 'o' || c == 'u') { count++; } } return count; }
Write a Java function to find the first duplicate in a given list of integers.	```java public Integer findFirstDuplicate(List<Integer> list) { Set<Integer> seen = new HashSet<>(); for (int num : list) { if (seen.contains(num)) { return num; } seen.add(num); } return null; }
Write a Java function to find the longest common prefix among a list of strings.	```java public String findLongestCommonPrefix(List<String> list) { if (list.isEmpty()) { return ""; } String prefix = list.get(0); for (String str : list) { while (!str.startsWith(prefix)) { prefix = prefix.substring(0, prefix.length() - 1); if (prefix.isEmpty()) { return ""; } } } return prefix; }
Write a Java function to filter out all the strings of length less than 5 from a given list of strings.	```java public List<String> filterShortStrings(List<String> list) { List<String> filteredList = new ArrayList<>(); for (String str : list) { if (str.length() >= 5) { filteredList.add(str); } } return filteredList; }
Given a string, write a Java function to count the number of vowels in the string.	public int countVowels(String str) { int count = 0; for (int i = 0; i < str.length(); i++) { char ch = str.charAt(i); if (ch == 'a' || ch == 'e' || ch == 'i' || ch == 'o' || ch == 'u' || ch == 'A' || ch == 'E' || ch == 'I' || ch == 'O' || ch == 'U') { count++; } } return count; }
Implement a function that takes a string as input and returns the string in reverse order.	public String reverseString(String str) { String reversed = ""; for(int i = str.length() - 1; i >= 0; i--) { reversed += str.charAt(i); } return reversed; }
Write a Java function to calculate the factorial of a given integer.	public int factorial(int n) { int result = 1; for(int i = 1; i <= n; i++) { result *= i; } return result; }
Write a Java function to determine whether a given string is a palindrome or not.	public boolean isPalindrome(String str) { String reversed = ""; for(int i = str.length() - 1; i >= 0; i--) { reversed += str.charAt(i); } return str.equals(reversed); }
Implement a function that takes a list of strings as input and returns the longest string in the list.	public String longestString(String[] strArray) { if (strArray.length == 0) { return null; } String longest = strArray[0]; for(int i = 1; i < strArray.length; i++) { if (strArray[i].length() > longest.length()) { longest = strArray[i]; } } return longest; }
Implement a function that takes a set of strings as input and returns the string with the maximum length.	```java import java.util.*; public class Main { public static String findLongestString(Set<String> strings) { String longestString = ""; for (String str : strings) { if (str.length() > longestString.length()) { longestString = str; } } return longestString; } public static void main(String[] args) { Set<String> strings = new HashSet<>(); strings.add("Hello"); strings.add("World"); strings.add("Ja…
Write a function to count the number of uppercase characters in a given string.	```java public class Main { public static int countUppercaseChars(String str) { int count = 0; for (int i = 0; i < str.length(); i++) { if (Character.isUpperCase(str.charAt(i))) { count++; } } return count; } public static void main(String[] args) { String str = "HelloWorld"; System.out.println(countUppercaseChars(str)); } }
Implement a function that takes a list of integers as input and returns the second largest number in the list.	```java public class Main { public static int findSecondLargestNumber(List<Integer> numbers) { if (numbers.size() < 2) { return -1; // or throw an exception } int max = Integer.MIN_VALUE; int secondMax = Integer.MIN_VALUE; for (int num : numbers) { if (num > max) { secondMax = max; max = num; } else if (num > secondMax && num != max) { secondMax = num; } } return secondMax; } public static void m…
Implement a function to convert a given temperature from Celsius to Fahrenheit.	```java public class Main { public static double celsiusToFahrenheit(double celsius) { return (celsius * 9 / 5) + 32; } public static void main(String[] args) { double celsius = 30; System.out.println(celsiusToFahrenheit(celsius)); } }
Write a function that takes a list of strings as input and returns a new list that contains only the strings starting with a vowel.	```java public class Main { public static List<String> filterVowelStrings(List<String> strings) { List<String> vowelStrings = new ArrayList<>(); for (String str : strings) { if (str.length() > 0 && "AEIOUaeiou".indexOf(str.charAt(0)) != -1) { vowelStrings.add(str); } } return vowelStrings; } public static void main(String[] args) { List<String> strings = Arrays.asList("Apple", "Banana", "Egg", "O…
Write a function that takes a list of strings as input and returns the string that appears most frequently.	public static String mostFrequentString(List<String> strings) { Map<String, Integer> frequencyMap = new HashMap<>(); for (String str : strings) { frequencyMap.put(str, frequencyMap.getOrDefault(str, 0) + 1); } String mostFrequent = null; int maxFrequency = 0; for (Map.Entry<String, Integer> entry : frequencyMap.entrySet()) { if (entry.getValue() > maxFrequency) { maxFrequency = entry.getValue(); …
Write a function that takes a list of integers as input and returns the count of numbers that are divisible by 3 or 5.	public static int countDivisibleNumbers(List<Integer> numbers) { int count = 0; for (int num : numbers) { if (num % 3 == 0 || num % 5 == 0) { count++; } } return count; }
Create a Java program that takes a list of strings as input and returns a list of strings with all vowels removed.	public static List<String> removeVowels(List<String> strings) { List<String> result = new ArrayList<>(); for (String str : strings) { StringBuilder sb = new StringBuilder(); for (char c : str.toCharArray()) { if (!isVowel(c)) { sb.append(c); } } result.add(sb.toString()); } return result; } private static boolean isVowel(char c) { c = Character.toLowerCase(c); return c == 'a' || c == 'e' || c == …
Write a function that takes a list of integers as input and returns the sum of the squares of the numbers.	public static int sumOfSquares(List<Integer> numbers) { int sum = 0; for (int num : numbers) { sum += num * num; } return sum; }
Create a Java program that takes a string as input and returns the string with all occurrences of a specified character replaced with another character.	public static String replaceCharacter(String str, char oldChar, char newChar) { return str.replace(oldChar, newChar); }
Create a function that finds the first duplicate in a given array and returns its index. If there are no duplicates, return -1.	``` public int findFirstDuplicate(int[] arr) { Map<Integer, Integer> map = new HashMap<>(); for (int i = 0; i < arr.length; i++) { if (map.containsKey(arr[i])) { return map.get(arr[i]); } else { map.put(arr[i], i); } } return -1; }
Write a function that calculates the sum of all numbers in a given array that are greater than a certain threshold.	``` public int sumAboveThreshold(int[] arr, int threshold) { int sum = 0; for (int num : arr) { if (num > threshold) { sum += num; } } return sum; }
Create a function that takes in a string and returns the string with all vowels removed.	``` public String removeVowels(String str) { String vowels = "aeiouAEIOU"; StringBuilder result = new StringBuilder(); for (char c : str.toCharArray()) { if (!vowels.contains(String.valueOf(c))) { result.append(c); } } return result.toString(); }
Write a function that takes in a list of strings and returns the string with the maximum length.	``` public String findLongestString(String[] arr) { String longest = ""; for (String str : arr) { if (str.length() > longest.length()) { longest = str; } } return longest; }
Create a function that takes in a 2D array and returns the maximum element in the array.	``` public int findMaxElement(int[][] arr) { int max = Integer.MIN_VALUE; for (int i = 0; i < arr.length; i++) { for (int j = 0; j < arr[i].length; j++) { if (arr[i][j] > max) { max = arr[i][j]; } } } return max; }
Write a function that takes a list of strings as input and returns the longest string.	public String longestString(List<String> strings) { String longest = ""; for (String s : strings) { if (s.length() > longest.length()) { longest = s; } } return longest; }
Write a function that takes a list of integers as input and returns the average of all numbers in the list.	public double average(List<Integer> numbers) { int sum = 0; for (int num : numbers) { sum += num; } return (double) sum / numbers.size(); }
Implement a function that takes a list of strings as input and returns the count of strings that start with a vowel.	public int countVowelStrings(List<String> strings) { int count = 0; for (String s : strings) { String firstLetter = s.substring(0, 1).toLowerCase(); if (firstLetter.equals("a") || firstLetter.equals("e") || firstLetter.equals("i") || firstLetter.equals("o") || firstLetter.equals("u")) { count++; } } return count; }
Write a function that takes two lists of integers as input and returns true if they contain the same elements in the same order, false otherwise.	public boolean sameOrder(List<Integer> list1, List<Integer> list2) { if (list1.size() != list2.size()) { return false; } for (int i = 0; i < list1.size(); i++) { if (list1.get(i) != list2.get(i)) { return false; } } return true; }
Write a function that takes a list of integers as input and returns the list sorted in ascending order.	public List<Integer> sortedList(List<Integer> numbers) { Collections.sort(numbers); return numbers; }
Write a Java function that takes a list of integers and returns the product of all the prime numbers in the list.	```java public class Main { public static int productOfPrimes(List<Integer> list) { int product = 1; for (int num : list) { if (isPrime(num)) { product *= num; } } return product; } public static boolean isPrime(int num) { if (num <= 1) { return false; } for (int i = 2; i * i <= num; i++) { if (num % i == 0) { return false; } } return true; } }
Write a function that takes a list of strings as input and returns the longest string that starts with the letter 'a'.	```java public class Main { public static String longestStringStartingWithA(List<String> list) { String longestString = ""; for (String str : list) { if (str.startsWith("a") && str.length() > longestString.length()) { longestString = str; } } return longestString; } }
Develop a Java function that takes a list of integers and returns the count of all the numbers that are divisible by 3 and 5.	```java public class Main { public static int countNumbersDivisibleBy3And5(List<Integer> list) { int count = 0; for (int num : list) { if (num % 3 == 0 && num % 5 == 0) { count++; } } return count; } }
Write a function that takes a list of integers as input and returns True if the list contains at least one even number, and False otherwise.	```java public class Main { public static boolean hasEvenNumber(List<Integer> list) { for (int num : list) { if (num % 2 == 0) { return true; } } return false; } }
Write a Java function that takes a list of strings as input and returns the count of all the strings that have more than 5 characters.	```java public class Main { public static int countStringsGreaterThan5Chars(List<String> list) { int count = 0; for (String str : list) { if (str.length() > 5) { count++; } } return count; } }
Write a Java function that takes an array of integers as input and returns True if the array contains at least one pair of integers with a difference of 5.	public boolean hasPairWithDifferenceFive(int[] arr) { HashSet<Integer> set = new HashSet<>(); for (int num : arr) { if (set.contains(num - 5) || set.contains(num + 5)) { return true; } set.add(num); } return false; }
Write a Java function that takes a string as input and returns the frequency of the most frequent character in the string.	public int mostFrequentCharFrequency(String str) { HashMap<Character, Integer> freqMap = new HashMap<>(); for (char c : str.toCharArray()) { freqMap.put(c, freqMap.getOrDefault(c, 0) + 1); } int maxFreq = 0; for (int freq : freqMap.values()) { maxFreq = Math.max(maxFreq, freq); } return maxFreq; }
Write a Java function that takes an array of integers as input and returns the count of all prime numbers in the array.	public int countPrimes(int[] arr) { int count = 0; for (int num : arr) { if (isPrime(num)) { count++; } } return count; } public boolean isPrime(int num) { if (num <= 1) { return false; } for (int i = 2; i * i <= num; i++) { if (num % i == 0) { return false; } } return true; }
Write a Java function that takes a string as input and returns True if the string is a palindrome, and False otherwise.	public boolean isPalindrome(String str) { int left = 0, right = str.length() - 1; while (left < right) { if (str.charAt(left) != str.charAt(right)) { return false; } left++; right--; } return true; }
Write a Java function that takes an array of integers as input and returns the sum of all elements in the array that are greater than their adjacent elements.	public int sumOfGreaterElements(int[] arr) { int sum = 0; for (int i = 1; i < arr.length; i++) { if (arr[i] > arr[i - 1]) { sum += arr[i]; } } return sum; }
Write a function `countDigits` that takes an integer as input and returns the count of digits in the number.	public int countDigits(int num) { int count = 0; while (num != 0) { num /= 10; count++; } return count; }
Write a function `checkPrime` that takes an integer as input and returns true if the number is prime, false otherwise.	public boolean checkPrime(int num) { if (num <= 1) { return false; } for (int i = 2; i <= Math.sqrt(num); i++) { if (num % i == 0) { return false; } } return true; }
Write a function `reverseArray` that takes an array of integers as input and returns the reversed array.	public int[] reverseArray(int[] arr) { int start = 0; int end = arr.length - 1; while (start < end) { int temp = arr[start]; arr[start] = arr[end]; arr[end] = temp; start++; end--; } return arr; }
Write a function `stringToUppercase` that takes a string as input and returns the string in uppercase.	public String stringToUppercase(String str) { return str.toUpperCase(); }
Write a function `sortArray` that takes an array of integers as input and returns the sorted array in ascending order.	public int[] sortArray(int[] arr) { Arrays.sort(arr); return arr; }
Write a function to find the minimum value in an array of integers.	```java public static int findMinValue(int[] array) { int min = array[0]; for (int i = 1; i < array.length; i++) { if (array[i] < min) { min = array[i]; } } return min; }
Develop a Java function to count the number of vowels in a given string.	```java public static int countVowels(String str) { int count = 0; for (int i = 0; i < str.length(); i++) { char c = str.charAt(i); if (c == 'a' || c == 'e' || c == 'i' || c == 'o' || c == 'u' || c == 'A' || c == 'E' || c == 'I' || c == 'O' || c == 'U') { count++; } } return count; }
Write a function to find the second largest element in an array of integers.	```java public static int findSecondLargest(int[] array) { int max = array[0]; int secondMax = Integer.MIN_VALUE; for (int i = 1; i < array.length; i++) { if (array[i] > max) { secondMax = max; max = array[i]; } else if (array[i] > secondMax && array[i] != max) { secondMax = array[i]; } } return secondMax; }
Develop a Java function to reverse a given string.	```java public static String reverseString(String str) { StringBuilder reversed = new StringBuilder(); for (int i = str.length() - 1; i >= 0; i--) { reversed.append(str.charAt(i)); } return reversed.toString(); }
Write a function to find all pairs of integers in an array whose sum is equal to a given target sum.	```java public static List<int[]> findPairs(int[] array, int targetSum) { List<int[]> pairs = new ArrayList<>(); for (int i = 0; i < array.length; i++) { for (int j = i + 1; j < array.length; j++) { if (array[i] + array[j] == targetSum) { pairs.add(new int[]{array[i], array[j]}); } } } return pairs; } ```
Given a list of strings, return a new list containing only the strings that start with a vowel.	```java public List<String> filterVowels(List<String> strings) { List<String> result = new ArrayList<>(); for (String str : strings) { if (str.length() > 0 && "aeiouAEIOU".indexOf(str.charAt(0)) != -1) { result.add(str); } } return result; }
Create a Java function that takes a list of integers as input and returns the average of the numbers in the list, rounded to two decimal places.	```java public double calculateAverage(List<Integer> numbers) { int sum = 0; for (int num : numbers) { sum += num; } return Math.round((double) sum / numbers.size() * 100.0) / 100.0; }
Write a Java function that takes a string as input and returns the string in reverse order.	```java public String reverseString(String str) { StringBuilder reversed = new StringBuilder(); for (int i = str.length() - 1; i >= 0; i--) { reversed.append(str.charAt(i)); } return reversed.toString(); }
Create a Java function that takes two lists of integers as input and returns a new list containing the elements that are present in either list, but not in both.	```java public List<Integer> getUniqueElements(List<Integer> list1, List<Integer> list2) { List<Integer> result = new ArrayList<>(list1); result.addAll(list2); result.removeAll(intersection(list1, list2)); return result; } public List<Integer> intersection(List<Integer> list1, List<Integer> list2) { List<Integer> result = new ArrayList<>(); for (int num : list1) { if (list2.contains(num)) { resul…
Write a Java function that takes a list of integers as input and returns a new list containing the squares of the numbers in the original list.	```java public List<Integer> squareNumbers(List<Integer> numbers) { List<Integer> result = new ArrayList<>(); for (int num : numbers) { result.add(num * num); } return result; }
Write a Java function that takes a list of integers as input and returns the count of all odd numbers in the list.	public int countOddNumbers(List<Integer> numbers) { int count = 0; for (Integer number : numbers) { if (number % 2 != 0) { count++; } } return count; }
Create a Java function that accepts a list of strings as input and returns the length of the longest string in the list.	public int findLongestStringLength(List<String> strings) { int maxLength = 0; for (String str : strings) { if (str.length() > maxLength) { maxLength = str.length(); } } return maxLength; }
You are given a list of integers. Write a Java function to find the sum of all numbers that are divisible by 5.	public int sumDivisibleByFive(List<Integer> numbers) { int sum = 0; for (Integer number : numbers) { if (number % 5 == 0) { sum += number; } } return sum; }
Create a Java function that takes a list of integers as input and returns the count of all numbers that appear in the first half of the list.	public int countFirstHalfNumbers(List<Integer> numbers) { int count = 0; int halfSize = numbers.size() / 2; Set<Integer> firstHalfNumbers = new HashSet<>(); for (int i = 0; i < halfSize; i++) { firstHalfNumbers.add(numbers.get(i)); } for (int i = halfSize; i < numbers.size(); i++) { if (firstHalfNumbers.contains(numbers.get(i))) { count++; } } return count; }
Develop a Java function that takes a 2D list of integers as input and returns the average of all numbers in the list.	public double calculateAverage(List<List<Integer>> numbers) { int totalSum = 0; int totalCount = 0; for (List<Integer> innerList : numbers) { for (Integer number : innerList) { totalSum += number; totalCount++; } } return (double) totalSum / totalCount; }
Write a function that takes a string as input and returns the string with all vowels removed.	public String removeVowels(String str) { String vowels = "aeiouAEIOU"; StringBuilder strBuilder = new StringBuilder(); for (int i = 0; i < str.length(); i++) { if (!vowels.contains(String.valueOf(str.charAt(i)))) { strBuilder.append(str.charAt(i)); } } return strBuilder.toString(); }
Write a function that takes a list of integers as input and returns the count of all prime numbers in the list.	public int countPrimes(List<Integer> numbers) { int count = 0; for (int num : numbers) { if (isPrime(num)) { count++; } } return count; } private boolean isPrime(int num) { if (num <= 1) { return false; } for (int i = 2; i * i <= num; i++) { if (num % i == 0) { return false; } } return true; }
Write a function that takes a list of strings as input and returns the longest string in the list.	public String findLongestString(List<String> strings) { String longestStr = ""; for (String str : strings) { if (str.length() > longestStr.length()) { longestStr = str; } } return longestStr; }
Write a function that takes two integer arrays as input and returns a new array containing the elements that are common to both arrays.	public int[] findCommonElements(int[] arr1, int[] arr2) { Set<Integer> set1 = new HashSet<>(); Set<Integer> set2 = new HashSet<>(); for (int num : arr1) { set1.add(num); } for (int num : arr2) { set2.add(num); } set1.retainAll(set2); int[] result = new int[set1.size()]; int i = 0; for (int num : set1) { result[i++] = num; } return result; }
Write a function that takes a string as input and returns the string with all characters in uppercase.	public String toUpperCase(String str) { return str.toUpperCase(); }
Write a function that takes a string as input and returns the string with all digits removed.	```java public String removeDigits(String str) { String result = ""; for (int i = 0; i < str.length(); i++) { if (!Character.isDigit(str.charAt(i))) { result += str.charAt(i); } } return result; }
Write a function that takes an array of integers as input and returns the sum of all even numbers.	```java public int sumEvenNumbers(int[] arr) { int sum = 0; for (int num : arr) { if (num % 2 == 0) { sum += num; } } return sum; }
Implement a function that takes a string as input and returns true if the string is a palindrome, false otherwise.	```java public boolean isPalindrome(String str) { int left = 0; int right = str.length() - 1; while (left < right) { if (str.charAt(left) != str.charAt(right)) { return false; } left++; right--; } return true; }
Write a function that takes a list of integers as input and returns the average of all numbers.	```java public double averageOfNumbers(List<Integer> list) { int sum = 0; for (int num : list) { sum += num; } return (double) sum / list.size(); }
Implement a function that takes an integer as input and returns the number of bits set to 1 in the binary representation of the number.	```java public int countBitsSet(int num) { int count = 0; while (num > 0) { count += num & 1; num >>= 1; } return count; }
Write a function to count the number of occurrences of a given character in a string.	public int countCharOccurrences(String str, char ch) { int count = 0; for (int i = 0; i < str.length(); i++) { if (str.charAt(i) == ch) { count++; } } return count; }
Write a function that takes a list of strings and returns the longest string in the list.	public String getLongestString(String[] strArr) { String longestStr = ""; for (String str : strArr) { if (str.length() > longestStr.length()) { longestStr = str; } } return longestStr; }
Create a program that takes a list of integers as input and returns the number of prime numbers in the list.	public int countPrimeNumbers(int[] arr) { int count = 0; for (int num : arr) { if (isPrime(num)) { count++; } } return count; } public boolean isPrime(int num) { if (num <= 1) { return false; } for (int i = 2; i <= Math.sqrt(num); i++) { if (num % i == 0) { return false; } } return true; }
Write a function that takes a string as an argument and returns the string with all consonants removed.	public String removeConsonants(String str) { String result = ""; for (char ch : str.toLowerCase().toCharArray()) { if (ch == 'a' || ch == 'e' || ch == 'i' || ch == 'o' || ch == 'u') { result += Character.toString(ch); } } return result; }
Create a program that takes a list of integers as input and returns the second largest number in the list.	public int getSecondLargestNumber(int[] arr) { int max = Integer.MIN_VALUE; int secondMax = Integer.MIN_VALUE; for (int num : arr) { if (num > max) { secondMax = max; max = num; } else if (num > secondMax && num != max) { secondMax = num; } } return secondMax; }
Write a Java function that takes a string as input and returns the string with all vowels removed.	public String removeVowels(String str) { String vowels = "aeiouAEIOU"; StringBuilder result = new StringBuilder(); for (char c : str.toCharArray()) { if (!vowels.contains(String.valueOf(c))) { result.append(c); } } return result.toString(); }
Implement a Java function that takes a list of strings as input and returns a new list with strings that have more than five characters.	import java.util.ArrayList; import java.util.List; public List<String> filterLongStrings(List<String> strs) { List<String> result = new ArrayList<>(); for (String str : strs) { if (str.length() > 5) { result.add(str); } } return result; }
Write a Java function that takes a list of integers as input and returns the product of all the numbers in the list.	public int multiplyAllNumbers(List<Integer> nums) { int product = 1; for (int num : nums) { product *= num; } return product; }
Implement a Java function that takes a list of strings as input and returns a new list with the strings converted to uppercase.	import java.util.ArrayList; import java.util.List; public List<String> convertToUppercase(List<String> strs) { List<String> result = new ArrayList<>(); for (String str : strs) { result.add(str.toUpperCase()); } return result; }
Write a Java function that takes a list of integers as input and returns the count of all the numbers that are greater than or equal to their successive number.	public int countIncreasingNumbers(List<Integer> nums) { int count = 0; for (int i = 0; i < nums.size() - 1; i++) { if (nums.get(i) <= nums.get(i + 1)) { count++; } } return count; }
Write a function that takes a list of integers as input and returns a list containing only the integers that are even.	```java public List<Integer> getEvenNumbers(List<Integer> numbers) { List<Integer> evenNumbers = new ArrayList<>(); for (Integer number : numbers) { if (number % 2 == 0) { evenNumbers.add(number); } } return evenNumbers; }
Write a function to calculate the average of a list of doubles.	```java public double calculateAverage(List<Double> numbers) { double sum = 0; for (Double number : numbers) { sum += number; } return sum / numbers.size(); }
You are given a string. Write a function to remove all vowels from the string.	```java public String removeVowels(String str) { return str.replaceAll("[aeiouAEIOU]", ""); }
Write a function to count the number of occurrences of a specific character in a string.	```java public int countCharOccurrences(String str, char ch) { int count = 0; for (char c : str.toCharArray()) { if (c == ch) { count++; } } return count; }
Write a function to find the maximum value in a list of integers.	```java public int findMaxValue(List<Integer> numbers) { int max = numbers.get(0); for (Integer number : numbers) { if (number > max) { max = number; } } return max; }
Write a function that takes a list of numbers as an input and returns the product of all the numbers in the list.	```java public static double productOfNumbers(List<Double> numbers) { double product = 1; for (double number : numbers) { product *= number; } return product; }
Write a function that takes a list of characters as an input and returns the frequency of each character in the list.	```java public static Map<Character, Integer> frequencyOfCharacters(List<Character> characters) { Map<Character, Integer> frequency = new HashMap<>(); for (char character : characters) { frequency.put(character, frequency.getOrDefault(character, 0) + 1); } return frequency; }
Write a function that takes two lists of strings as inputs and returns the common strings between the two lists.	```java public static List<String> commonStrings(List<String> list1, List<String> list2) { List<String> common = new ArrayList<>(); for (String string : list1) { if (list2.contains(string)) { common.add(string); } } return common; }
Write a function that takes a list of integers as an input and returns the count of numbers that are divisible by 3.	```java public static int countDivisibleByThree(List<Integer> numbers) { int count = 0; for (int number : numbers) { if (number % 3 == 0) { count++; } } return count; }
Write a function that takes a list of strings as an input and returns the average length of all the strings in the list.	```java public static double averageStringLength(List<String> strings) { int totalLength = 0; for (String string : strings) { totalLength += string.length(); } return (double) totalLength / strings.size(); }
Write a Java function to find the average of a list of integers.	```java public static double findAverage(List<Integer> numbers) { int sum = 0; for (int num : numbers) { sum += num; } return (double) sum / numbers.size(); }
Write a Java function to check if a given string contains all vowels at least once.	```java public static boolean containsAllVowels(String str) { str = str.toLowerCase(); String vowels = "aeiou"; for (char vowel : vowels.toCharArray()) { if (!str.contains(String.valueOf(vowel))) { return false; } } return true; }
Write a Java function to find the maximum difference between two elements in a list of integers.	```java public static int findMaxDifference(List<Integer> numbers) { int max = numbers.get(0); int min = numbers.get(0); for (int num : numbers) { if (num > max) { max = num; } else if (num < min) { min = num; } } return max - min; }
Write a Java function to check if a given string is a rotation of another given string.	```java public static boolean isRotation(String str1, String str2) { if (str1.length() != str2.length()) { return false; } String temp = str1 + str1; return temp.contains(str2); }
Write a Java function to find the number of occurrences of a given character in a string.	```java public static int countOccurrences(String str, char ch) { int count = 0; for (char c : str.toCharArray()) { if (c == ch) { count++; } } return count; }
Write a function that takes a list of integers as input and returns the sum of all the integers in the list.	public static int sumOfList(List<Integer> numbers) { int sum = 0; for (int number : numbers) { sum += number; } return sum; }
Write a function that takes a string as input and returns the string in reverse order.	public static String reverseString(String str) { String reversed = ""; for (int i = str.length() - 1; i >= 0; i--) { reversed += str.charAt(i); } return reversed; }
Write a function that takes a list of strings as input and returns a new list containing only the strings that start with a vowel.	public static List<String> stringsStartingWithVowel(List<String> strings) { List<String> result = new ArrayList<>(); for (String str : strings) { String firstLetter = str.substring(0, 1).toLowerCase(); if (firstLetter.equals("a") || firstLetter.equals("e") || firstLetter.equals("i") || firstLetter.equals("o") || firstLetter.equals("u")) { result.add(str); } } return result; }
Write a function that takes two integers as input and returns their greatest common divisor.	public static int gcd(int a, int b) { if (b == 0) { return a; } else { return gcd(b, a % b); } }
Write a function that takes a list of integers as input and returns true if the list is in ascending order, false otherwise.	public static boolean isInAscendingOrder(List<Integer> numbers) { for (int i = 0; i < numbers.size() - 1; i++) { if (numbers.get(i) > numbers.get(i + 1)) { return false; } } return true; }
Write a Java function that takes a string as input and returns the frequency of each character in the string.	public class Main { public static void main(String[] args) { System.out.println(charFrequency("Hello World")); } public static String charFrequency(String str) { String result = ""; for (int i = 0; i < str.length(); i++) { int count = 0; for (int j = 0; j < str.length(); j++) { if (str.charAt(i) == str.charAt(j)) { count++; } } result += "Frequency of " + str.charAt(i) + " is " + count + "\n"; } …
Design a Java function that takes a single string input and returns the string with all consonants converted to uppercase and vowels converted to lowercase.	public class Main { public static void main(String[] args) { System.out.println(makeCaseChange("Hello World")); } public static String makeCaseChange(String str) { String result = ""; for (int i = 0; i < str.length(); i++) { char c = str.charAt(i); if ((c >= 'a' && c <= 'z') && (c != 'a' && c != 'e' && c != 'i' && c != 'o' && c != 'u')) { result += Character.toUpperCase(c); } else if ((c >= 'A' &…
Write a Java function that takes a list of strings as input and returns a new list with duplicate strings removed and the remaining strings in lowercase.	import java.util.*; public class Main { public static void main(String[] args) { List<String> list = new ArrayList<>(); list.add("Hello"); list.add("World"); list.add("Hello"); list.add("Java"); System.out.println(removeDuplicatesAndLowercase(list)); } public static List<String> removeDuplicatesAndLowercase(List<String> list) { List<String> result = new ArrayList<>(); for (String str : list) { if…
Design a Java function that takes two lists of integers as input and returns a new list containing the sum of corresponding elements from both lists.	import java.util.*; public class Main { public static void main(String[] args) { List<Integer> list1 = new ArrayList<>(); list1.add(1); list1.add(2); list1.add(3); List<Integer> list2 = new ArrayList<>(); list2.add(4); list2.add(5); list2.add(6); System.out.println(sumCorrespondingElements(list1, list2)); } public static List<Integer> sumCorrespondingElements(List<Integer> list1, List<Integer> li…
Write a Java function that takes an integer as input and returns the factorial of that number.	public class Main { public static void main(String[] args) { System.out.println(factorial(5)); } public static int factorial(int n) { int result = 1; for (int i = 1; i <= n; i++) { result *= i; } return result; } }
Write a function that takes a list of strings as input and returns a new list containing only the strings that start with an uppercase letter.	```java public List<String> filterUppercaseStrings(List<String> strings) { List<String> result = new ArrayList<>(); for (String s : strings) { if (Character.isUpperCase(s.charAt(0))) { result.add(s); } } return result; }
Create a Java function to find the first duplicate element in a list of integers.	```java public Integer findFirstDuplicate(List<Integer> list) { Set<Integer> set = new HashSet<>(); for (Integer i : list) { if (!set.add(i)) { return i; } } return null; }
Design a Java function that takes a 2D array of integers as input and returns the sum of all the elements in the array.	```java public int sum2DArray(int[][] array) { int sum = 0; for (int i = 0; i < array.length; i++) { for (int j = 0; j < array[i].length; j++) { sum += array[i][j]; } } return sum; }
Write a function that takes a list of integers as input and returns the number of elements that are greater than the average of the list.	```java public int countAboveAverage(List<Integer> list) { int sum = 0; for (Integer i : list) { sum += i; } double average = (double) sum / list.size(); int count = 0; for (Integer i : list) { if (i > average) { count++; } } return count; }
Create a Java function to find the longest common prefix among a list of strings.	```java public String longestCommonPrefix(List<String> strings) { if (strings.isEmpty()) { return ""; } String prefix = strings.get(0); for (String s : strings) { while (!s.startsWith(prefix)) { prefix = prefix.substring(0, prefix.length() - 1); if (prefix.isEmpty()) { return ""; } } } return prefix; }
Write a Java function that takes a string as input and returns True if the string is a palindrome, False otherwise.	public boolean isPalindrome(String str) { String reversed = new StringBuilder(str).reverse().toString(); return str.equals(reversed); }
Given a list of strings, write a function to find the longest string and return it. If there are multiple strings with the same maximum length, return the first one.	public String findLongestString(List<String> strings) { if (strings.isEmpty()) return ""; String longest = strings.get(0); for (String str : strings) { if (str.length() > longest.length()) { longest = str; } } return longest; }
Write a Java function that takes a list of pairs of numbers as input and returns the sum of the differences of each pair.	public int sumOfDifferences(List<int[]> pairs) { int sum = 0; for (int[] pair : pairs) { sum += Math.abs(pair[0] - pair[1]); } return sum; }
Write a Java function that takes a list of strings as input and returns the count of strings that start with a vowel.	public int countVowelStrings(List<String> strings) { int count = 0; for (String str : strings) { char firstChar = str.charAt(0); if (firstChar == 'a' || firstChar == 'e' || firstChar == 'i' || firstChar == 'o' || firstChar == 'u' || firstChar == 'A' || firstChar == 'E' || firstChar == 'I' || firstChar == 'O' || firstChar == 'U') { count++; } } return count; }
Write a Java function that takes a list of integers as input and returns True if the list is sorted in ascending order, False otherwise.	public boolean isSorted(List<Integer> list) { for (int i = 0; i < list.size() - 1; i++) { if (list.get(i) > list.get(i + 1)) { return false; } } return true; }
Implement a Java function that takes a string as input and returns the number of words in the string.	public int countWords(String str) { if (str == null || str.trim().isEmpty()) return 0; String[] words = str.split("\\s+"); return words.length; }
Create a Java function that takes a list of integers as input and returns the average of the elements in the list, rounded to two decimal places.	import java.util.List; public double calculateAverage(List<Integer> numbers) { if (numbers == null || numbers.isEmpty()) return 0.0; double sum = 0; for (int number : numbers) sum += number; return Math.round(sum / numbers.size() * 100.0) / 100.0; }
Implement a Java function that takes a list of strings as input and returns the longest string in the list.	import java.util.List; public String findLongestString(List<String> strings) { if (strings == null || strings.isEmpty()) return ""; String longestString = strings.get(0); for (String str : strings) { if (str.length() > longestString.length()) longestString = str; } return longestString; }
Write a Java function that takes a string as input and returns the string in reverse order.	public String reverseString(String str) { if (str == null) return null; StringBuilder reversedStr = new StringBuilder(str).reverse(); return reversedStr.toString(); }
Create a Java function that takes a list of integers as input and returns the maximum number in the list.	import java.util.List; public int findMaxNumber(List<Integer> numbers) { if (numbers == null || numbers.isEmpty()) return Integer.MIN_VALUE; int maxNumber = numbers.get(0); for (int number : numbers) { if (number > maxNumber) maxNumber = number; } return maxNumber; }
Write a Java function to calculate the average of all the elements in a given integer array.	```java public class Main { public static double calculateAverage(int[] array) { int sum = 0; for (int num : array) { sum += num; } return (double) sum / array.length; } public static void main(String[] args) { int[] array = {1, 2, 3, 4, 5}; System.out.println("The average of the array is: " + calculateAverage(array)); } }
Write a Java function to count the number of palindromic strings in a given list of strings.	```java public class Main { public static int countPalindromes(List<String> strings) { int count = 0; for (String str : strings) { if (isPalindrome(str)) { count++; } } return count; } public static boolean isPalindrome(String str) { String reversed = new StringBuilder(str).reverse().toString(); return str.equals(reversed); } public static void main(String[] args) { List<String> strings = Arrays.…
Create a function that takes a list of integers and returns the largest number that is less than or equal to the given maximum value.	```java public class Main { public static int largestNumber(List<Integer> numbers, int maxValue) { int largest = Integer.MIN_VALUE; for (int num : numbers) { if (num <= maxValue && num > largest) { largest = num; } } return largest; } public static void main(String[] args) { List<Integer> numbers = Arrays.asList(10, 20, 15, 30, 25); int maxValue = 25; System.out.println("The largest number is: " …
Write a Java function to convert all the characters in a given string to uppercase.	```java public class Main { public static String toUpperCase(String str) { return str.toUpperCase(); } public static void main(String[] args) { String str = "hello world"; System.out.println("The string in uppercase is: " + toUpperCase(str)); } }
Create a function that takes a list of integers and returns the number of pairs of adjacent elements that have a difference of 1.	```java public class Main { public static int countAdjacentPairs(List<Integer> numbers) { int count = 0; for (int i = 0; i < numbers.size() - 1; i++) { if (Math.abs(numbers.get(i) - numbers.get(i + 1)) == 1) { count++; } } return count; } public static void main(String[] args) { List<Integer> numbers = Arrays.asList(1, 2, 3, 4, 3, 2, 1); System.out.println("The number of adjacent pairs is: " + co…
Write a Java function to count the frequency of each character in a given string and return the count as a HashMap.	```java import java.util.HashMap; import java.util.Map; public class CharacterFrequency { public static Map<Character, Integer> countCharacters(String str) { Map<Character, Integer> charCount = new HashMap<>(); for (char c : str.toCharArray()) { if (charCount.containsKey(c)) { charCount.put(c, charCount.get(c) + 1); } else { charCount.put(c, 1); } } return charCount; } }
Write a Java function that takes a list of strings as input and returns a new list with all strings converted to uppercase.	```java import java.util.ArrayList; import java.util.List; public class StringToUppercase { public static List<String> convertToUppercase(List<String> strList) { List<String> uppercaseList = new ArrayList<>(); for (String str : strList) { uppercaseList.add(str.toUpperCase()); } return uppercaseList; } }
Write a Java function that takes two lists of integers as input and returns the sum of the products of corresponding elements from both lists.	```java import java.util.List; public class ProductSum { public static int sumOfProducts(List<Integer> list1, List<Integer> list2) { int sum = 0; for (int i = 0; i < list1.size(); i++) { sum += list1.get(i) * list2.get(i); } return sum; } }
Write a Java function that takes a list of integers as input and returns the number of prime numbers in the list.	```java import java.util.List; public class CountPrimeNumbers { public static int countPrimes(List<Integer> numbers) { int count = 0; for (int num : numbers) { if (isPrime(num)) { count++; } } return count; } private static boolean isPrime(int num) { if (num <= 1) { return false; } for (int i = 2; i * i <= num; i++) { if (num % i == 0) { return false; } } return true; } }
Write a Java function that takes a list of strings as input and returns the longest string in the list.	```java import java.util.List; public class LongestString { public static String getLongestString(List<String> strList) { String longestStr = ""; for (String str : strList) { if (str.length() > longestStr.length()) { longestStr = str; } } return longestStr; } }
Write a function that takes a string as input and returns the string in reverse order.	public class Main { public static String reverseString(String str) { String reversed = ""; for(int i = str.length() - 1; i >= 0; i--) { reversed += str.charAt(i); } return reversed; } public static void main(String[] args) { System.out.println(reverseString("Hello World")); } }
Write a function that takes a list of strings as input and returns a new list that contains only the strings with a length of 5 characters or more.	public class Main { public static List<String> filterStrings(List<String> list) { List<String> newList = new ArrayList<>(); for(String str : list) { if(str.length() >= 5) { newList.add(str); } } return newList; } public static void main(String[] args) { List<String> list = Arrays.asList("hello", "world", "abc", "python", "java", "c++", "swift"); System.out.println(filterStrings(list)); } }
Write a function that takes an integer as input and returns the number of 1's in its binary representation.	public class Main { public static int countOnes(int num) { int count = 0; while(num != 0) { count += num & 1; num >>= 1; } return count; } public static void main(String[] args) { System.out.println(countOnes(9)); // Output: 2 } }
Write a function that takes a 2D array as input and returns the sum of all elements in the array.	public class Main { public static int sumArray(int[][] array) { int sum = 0; for(int i = 0; i < array.length; i++) { for(int j = 0; j < array[i].length; j++) { sum += array[i][j]; } } return sum; } public static void main(String[] args) { int[][] array = {{1, 2, 3}, {4, 5, 6}, {7, 8, 9}}; System.out.println(sumArray(array)); // Output: 45 } }
Write a function that takes a list of integers as input and returns the maximum value in the list.	public class Main { public static int findMax(List<Integer> list) { int max = list.get(0); for(int i = 1; i < list.size(); i++) { if(list.get(i) > max) { max = list.get(i); } } return max; } public static void main(String[] args) { List<Integer> list = Arrays.asList(1, 2, 3, 4, 5, 6); System.out.println(findMax(list)); // Output: 6 } }
Write a Java function to find the number of occurrences of the maximum element in a given array.	public static int findMaxOccurence(int[] array) { int max = Integer.MIN_VALUE; int maxOccurence = 0; for (int i = 0; i < array.length; i++) { if (array[i] > max) { max = array[i]; maxOccurence = 1; } else if (array[i] == max) { maxOccurence++; } } return maxOccurence; }
Write a Java function that takes a string as input and returns the string with all vowels removed.	public static String removeVowels(String str) { String vowels = "aeiouAEIOU"; String result = ""; for (int i = 0; i < str.length(); i++) { if (!vowels.contains(String.valueOf(str.charAt(i)))) { result += str.charAt(i); } } return result; }
Create a Java function that takes a list of integers as input and returns the list with all duplicates removed.	import java.util.LinkedHashSet; import java.util.Set; public static int[] removeDuplicates(int[] array) { Set<Integer> set = new LinkedHashSet<>(); for (int i : array) { set.add(i); } int[] result = new int[set.size()]; int i = 0; for (int num : set) { result[i++] = num; } return result; }
Write a Java function that takes a 2D array as input and returns the sum of all elements in the 2D array.	public static int sum2DArray(int[][] array) { int sum = 0; for (int i = 0; i < array.length; i++) { for (int j = 0; j < array[i].length; j++) { sum += array[i][j]; } } return sum; }
Create a Java function that takes a string as input and returns true if the string is a palindrome, false otherwise.	public static boolean isPalindrome(String str) { int i = 0, j = str.length() - 1; while (i < j) { if (str.charAt(i) != str.charAt(j)) { return false; } i++; j--; } return true; }
Write a Java function that takes a list of integers as input and returns the list with all negative numbers replaced with their absolute values.	public static int[] replaceNegativesWithAbsolute(int[] array) { for (int i = 0; i < array.length; i++) { if (array[i] < 0) { array[i] = Math.abs(array[i]); } } return array; }
Write a Java function that takes two integers as input and returns the interchanged values of the two integers without using a third variable.	public class Main { public static void main(String[] args) { int a = 10; int b = 20; interchangeValues(a, b); } public static void interchangeValues(int a, int b) { a = a + b; b = a - b; a = a - b; System.out.println("a = " + a); System.out.println("b = " + b); } }
Create a Java function that takes a string as input and returns the string in reverse order.	public class Main { public static void main(String[] args) { String str = "hello"; System.out.println(reverseString(str)); } public static String reverseString(String str) { String reversed = ""; for(int i = str.length() - 1; i >= 0; i--) { reversed = reversed + str.charAt(i); } return reversed; } }
Write a Java function that takes a list of integers as input and returns the second largest element in the list.	import java.util.Arrays; public class Main { public static void main(String[] args) { int[] arr = {12, 34, 5, 67, 7}; System.out.println(secondLargest(arr)); } public static int secondLargest(int[] arr) { Arrays.sort(arr); return arr[arr.length - 2]; } }
Create a Java function that takes a string as input and returns the count of the occurrence of the word "the" in the given string, ignoring case sensitivity.	public class Main { public static void main(String[] args) { String str = "The quick brown fox jumps over the lazy dog"; System.out.println(countThe(str)); } public static int countThe(String str) { String[] words = str.split(" "); int count = 0; for (String word : words) { if (word.equalsIgnoreCase("the")) { count++; } } return count; } }
Write a Java function that takes an integer as input and returns true if the number is a palindrome, false otherwise.	public class Main { public static void main(String[] args) { int num = 12321; System.out.println(isPalindrome(num)); } public static boolean isPalindrome(int num) { int reversed = 0; int original = num; while (num != 0) { int digit = num % 10; reversed = reversed * 10 + digit; num /= 10; } return original == reversed; } }
You are given a string of digits, write a Java function to separate the digits by dashes.	``` public String separateDigits(String str) { String result = ""; for (char c : str.toCharArray()) { result += c + "-"; } return result.substring(0, result.length() - 1); }
Design a Java function that takes a list of strings as input and returns the string with the maximum length.	``` public String findLongestString(List<String> list) { String longestString = ""; for (String str : list) { if (str.length() > longestString.length()) { longestString = str; } } return longestString; }
You are given two lists of integers, write a Java function to find the common elements between the two lists.	``` public List<Integer> findCommonElements(List<Integer> list1, List<Integer> list2) { List<Integer> commonElements = new ArrayList<>(); for (Integer element : list1) { if (list2.contains(element)) { commonElements.add(element); } } return commonElements; }
Create a program that takes a list of integers as input and checks if the list is in ascending order.	``` public boolean isAscendingOrder(List<Integer> list) { for (int i = 0; i < list.size() - 1; i++) { if (list.get(i) > list.get(i + 1)) { return false; } } return true; }
Write a Java function that takes a string as input and returns the string with all vowels removed.	``` public String removeVowels(String str) { String result = ""; for (char c : str.toLowerCase().toCharArray()) { if (!(c == 'a' || c == 'e' || c == 'i' || c == 'o' || c == 'u')) { result += c; } } return result; }
Write a function to find the average of all prime numbers in a given list of integers.	```java public class Main { public static double averageOfPrimes(List<Integer> numbers) { int sum = 0; int count = 0; for (int num : numbers) { if (isPrime(num)) { sum += num; count++; } } if (count == 0) { return 0.0; } return (double) sum / count; } public static boolean isPrime(int num) { if (num <= 1) { return false; } for (int i = 2; i <= Math.sqrt(num); i++) { if (num % i == 0) { return fal…
Develop a Java function that takes a string as input and returns the frequency of each word in the string.	```java import java.util.HashMap; import java.util.Map; public class Main { public static Map<String, Integer> wordFrequency(String input) { Map<String, Integer> frequencyMap = new HashMap<>(); String[] words = input.split("\\s+"); for (String word : words) { word = word.toLowerCase(); if (frequencyMap.containsKey(word)) { frequencyMap.put(word, frequencyMap.get(word) + 1); } else { frequencyMap.…
Write a function to find the longest common prefix in a list of strings.	```java public class Main { public static String longestCommonPrefix(List<String> strings) { if (strings.isEmpty()) { return ""; } String prefix = strings.get(0); for (String s : strings) { while (!s.startsWith(prefix)) { prefix = prefix.substring(0, prefix.length() - 1); if (prefix.isEmpty()) { return ""; } } } return prefix; } }
Implement a Java function that takes a 2D list of characters as input and returns True if the characters in each row are unique, False otherwise.	```java import java.util.Set; import java.util.HashSet; public class Main { public static boolean areRowsUnique(char[][] matrix) { for (char[] row : matrix) { Set<Character> uniqueChars = new HashSet<>(); for (char c : row) { if (!uniqueChars.add(c)) { return false; } } } return true; } }
Create a Java function that takes a list of strings as input and returns the string with the maximum length.	```java public class Main { public static String maxLengthString(List<String> strings) { String maxLengthString = ""; for (String s : strings) { if (s.length() > maxLengthString.length()) { maxLengthString = s; } } return maxLengthString; } }
Write a function that takes a list of integers as input and returns the count of even numbers in the list.	public int countEvenNumbers(List<Integer> numbers) { int count = 0; for (int number : numbers) { if (number % 2 == 0) { count++; } } return count; }
Write a function that takes a string as input and returns the count of vowels in the string.	public int countVowels(String str) { int count = 0; for (char c : str.toLowerCase().toCharArray()) { if (c == 'a' || c == 'e' || c == 'i' || c == 'o' || c == 'u') { count++; } } return count; }
Write a function that takes a list of integers as input and returns the second largest number in the list.	public int findSecondLargestNumber(List<Integer> numbers) { if (numbers.size() < 2) { return -1; // or throw an exception } Collections.sort(numbers); return numbers.get(numbers.size() - 2); }
Write a function that takes a string as input and returns the reversed string.	public String reverseString(String str) { String reversed = ""; for (int i = str.length() - 1; i >= 0; i--) { reversed += str.charAt(i); } return reversed; }
Write a function that takes a list of strings as input and returns the count of strings that start with a vowel.	public int countStringsThatStartWithVowel(List<String> strs) { int count = 0; for (String str : strs) { char c = str.toLowerCase().charAt(0); if (c == 'a' || c == 'e' || c == 'i' || c == 'o' || c == 'u') { count++; } } return count; }
Write a function to remove duplicates from a list of integers.	public List<Integer> removeDuplicates(List<Integer> list) { List<Integer> newList = new ArrayList<>(); for (Integer num : list) { if (!newList.contains(num)) { newList.add(num); } } return newList; }
Write a function that takes a list of strings as input and returns the longest string in the list.	public String findLongestString(List<String> list) { String longest = ""; for (String str : list) { if (str.length() > longest.length()) { longest = str; } } return longest; }
Write a function that takes a list of integers and returns true if the list is sorted in ascending order, false otherwise.	public boolean isSorted(List<Integer> list) { for (int i = 0; i < list.size() - 1; i++) { if (list.get(i) > list.get(i + 1)) { return false; } } return true; }
Write a function that takes a string as input and returns the string with all vowels removed.	public String removeVowels(String str) { String newStr = ""; for (char c : str.toCharArray()) { if (!isVowel(c)) { newStr += c; } } return newStr; } public boolean isVowel(char c) { c = Character.toLowerCase(c); return c == 'a' || c == 'e' || c == 'i' || c == 'o' || c == 'u'; }
Write a function that takes two lists of strings as input and returns a new list that contains only the strings that are common to both lists, ignoring case sensitivity.	public List<String> commonElements(List<String> list1, List<String> list2) { List<String> newList = new ArrayList<>(); for (String str1 : list1) { for (String str2 : list2) { if (str1.equalsIgnoreCase(str2)) { newList.add(str1); } } } return newList; }
Create a Java function that calculates the power of a given number without using the built-in pow function or multiplication operator.	```java public class Main { public static double power(double base, int exponent) { double result = 1; for (int i = 0; i < Math.abs(exponent); i++) { result = result / base; } if (exponent < 0) { return 1 / result; } else { return result; } } public static void main(String[] args) { System.out.println(power(2, 3)); // Output: 8.0 } }
Write a Java function that takes a string input and returns the count of vowels in the string.	```java public class Main { public static int countVowels(String str) { str = str.toLowerCase(); int count = 0; for (int i = 0; i < str.length(); i++) { char ch = str.charAt(i); if (ch == 'a' || ch == 'e' || ch == 'i' || ch == 'o' || ch == 'u') { count++; } } return count; } public static void main(String[] args) { System.out.println(countVowels("Hello World")); // Output: 3 } }
Implement a Java function that takes a list of integers and returns True if the list has at least one pair of identical adjacent elements, False otherwise.	```java import java.util.Arrays; public class Main { public static boolean hasAdjacentDuplicates(int[] arr) { for (int i = 0; i < arr.length - 1; i++) { if (arr[i] == arr[i + 1]) { return true; } } return false; } public static void main(String[] args) { int[] arr = {1, 2, 2, 3, 4}; System.out.println(hasAdjacentDuplicates(arr)); // Output: true } }
Create a Java function that takes a list of strings and returns the longest common prefix among all strings.	```java import java.util.Arrays; public class Main { public static String longestCommonPrefix(String[] strs) { if (strs.length == 0) { return ""; } String prefix = strs[0]; for (int i = 1; i < strs.length; i++) { while (strs[i].indexOf(prefix) != 0) { prefix = prefix.substring(0, prefix.length() - 1); if (prefix.isEmpty()) { return ""; } } } return prefix; } public static void main(String[] args)…
Write a Java function that takes a list of integers and returns the count of elements that are greater than the preceding element.	```java import java.util.Arrays; public class Main { public static int countIncreasing(int[] arr) { int count = 0; for (int i = 1; i < arr.length; i++) { if (arr[i] > arr[i - 1]) { count++; } } return count; } public static void main(String[] args) { int[] arr = {1, 2, 3, 4, 5}; System.out.println(countIncreasing(arr)); // Output: 4 } }
Write a Java function to find the number of occurrences of a specific character in a given string.	```java public class Main { public static int countCharOccurrences(String str, char c) { int count = 0; for (int i = 0; i < str.length(); i++) { if (str.charAt(i) == c) { count++; } } return count; } public static void main(String[] args) { String str = "Hello, World!"; char c = 'o'; System.out.println("Number of occurrences of '" + c + "': " + countCharOccurrences(str, c)); } }
Given an array of integers, write a function to find the index of the first element that is greater than the average of the array.	```java public class Main { public static int findIndexAboveAverage(int[] arr) { int sum = 0; for (int i : arr) { sum += i; } double average = (double) sum / arr.length; for (int i = 0; i < arr.length; i++) { if (arr[i] > average) { return i; } } return -1; // Return -1 if no element is above the average } public static void main(String[] args) { int[] arr = {1, 2, 3, 4, 5, 6}; int index = findIn…
Write a Java function to reverse the order of words in a given sentence.	```java public class Main { public static String reverseWords(String sentence) { String[] words = sentence.split(" "); StringBuilder reversedSentence = new StringBuilder(); for (int i = words.length - 1; i >= 0; i--) { reversedSentence.append(words[i]).append(" "); } return reversedSentence.toString().trim(); } public static void main(String[] args) { String sentence = "Hello World Java"; System.…
Given two integers, write a function to find their greatest common divisor (GCD) using the Euclidean algorithm.	```java public class Main { public static int findGCD(int a, int b) { if (b == 0) { return a; } return findGCD(b, a % b); } public static void main(String[] args) { int a = 48; int b = 18; System.out.println("GCD of " + a + " and " + b + ": " + findGCD(a, b)); } }
Write a Java function to check if a given string is a palindrome.	```java public class Main { public static boolean isPalindrome(String str) { String reversedStr = new StringBuilder(str).reverse().toString(); return str.equalsIgnoreCase(reversedStr); } public static void main(String[] args) { String str = "Madam"; System.out.println(str + " is a palindrome: " + isPalindrome(str)); } }
Write a function that takes a string of 24-hour clock time as input and returns the time in 12-hour clock format.	```java public class Main { public static String convertTime(String time) { String[] parts = time.split(":"); int hour = Integer.parseInt(parts[0]); int minute = Integer.parseInt(parts[1]); String suffix; if (hour > 12) { hour -= 12; suffix = " PM"; } else if (hour == 0) { hour = 12; suffix = " AM"; } else if (hour == 12) { suffix = " PM"; } else { suffix = " AM"; } return hour + ":" + parts[1] +…
Given a list of integers, write a function to find the first duplicate in the list.	```java import java.util.HashSet; public class Main { public static Integer findFirstDuplicate(int[] list) { HashSet<Integer> seen = new HashSet<>(); for (int num : list) { if (!seen.add(num)) { return num; } } return null; } public static void main(String[] args) { int[] list = {1, 2, 3, 4, 2, 5}; System.out.println(findFirstDuplicate(list)); } }
Write a function that takes a string as input and returns the string with all vowels removed.	```java public class Main { public static String removeVowels(String str) { return str.replaceAll("[aeiouAEIOU]", ""); } public static void main(String[] args) { System.out.println(removeVowels("Hello World")); } }
Given a list of strings, write a function that returns the longest string in the list.	```java public class Main { public static String findLongestString(String[] list) { String longest = list[0]; for (String str : list) { if (str.length() > longest.length()) { longest = str; } } return longest; } public static void main(String[] args) { String[] list = {"apple", "banana", "orange", "grape"}; System.out.println(findLongestString(list)); } }
Write a function that takes an integer as input and returns the sum of its digits.	```java public class Main { public static int sumOfDigits(int num) { int sum = 0; while (num != 0) { sum += num % 10; num /= 10; } return sum; } public static void main(String[] args) { System.out.println(sumOfDigits(123)); } }
Write a Java function that takes two strings as input and returns true if the second string is a substring of the first string, false otherwise.	```java public boolean isSubstring(String mainString, String subString) { return mainString.contains(subString); }
Write a Java function that takes a list of integers as input and returns the average of the numbers.	```java import java.util.ArrayList; public double calculateAverage(ArrayList<Integer> numbers) { int sum = 0; for (int number : numbers) { sum += number; } return (double) sum / numbers.size(); }
Write a Java function that takes a string as input and returns the string with all digits removed.	```java public String removeDigits(String inputString) { return inputString.replaceAll("\\d", ""); }
Write a Java function that takes a list of strings as input and returns the longest string in the list.	```java import java.util.ArrayList; public String findLongestString(ArrayList<String> strings) { String longestString = ""; for (String str : strings) { if (str.length() > longestString.length()) { longestString = str; } } return longestString; }
Write a Java function that takes an integer as input and returns true if the number is a prime number, false otherwise.	```java public boolean isPrime(int number) { if (number <= 1) { return false; } for (int i = 2; i <= Math.sqrt(number); i++) { if (number % i == 0) { return false; } } return true; }
Write a function that takes a list of strings as input and returns a new list containing all the strings that start with a vowel.	```java import java.util.ArrayList; import java.util.List; public class Main { public static List<String> filterVowelStrings(List<String> input) { List<String> result = new ArrayList<>(); for (String str : input) { if (str.length() > 0 && isVowel(str.charAt(0))) { result.add(str); } } return result; } public static boolean isVowel(char c) { c = Character.toUpperCase(c); return c == 'A' || c == 'E…
Write a function that takes a single integer as input and returns true if the number is a perfect number, false otherwise.	```java public class Main { public static boolean isPerfectNumber(int num) { int sum = 0; for (int i = 1; i < num; i++) { if (num % i == 0) { sum += i; } } return sum == num; } public static void main(String[] args) { int num = 28; boolean result = isPerfectNumber(num); System.out.println(result); } }
Implement a function that takes a list of integers as input and returns the maximum difference between any two elements in the list.	```java public class Main { public static int findMaxDifference(List<Integer> input) { if (input.size() < 2) { return 0; } int min = input.get(0); int maxDiff = input.get(1) - input.get(0); for (int i = 1; i < input.size(); i++) { if (input.get(i) - min > maxDiff) { maxDiff = input.get(i) - min; } if (input.get(i) < min) { min = input.get(i); } } return maxDiff; } public static void main(String[]…
Write a function that takes a single string as input and returns true if the string is a palindrome, false otherwise.	```java public class Main { public static boolean isPalindrome(String str) { int start = 0; int end = str.length() - 1; while (start < end) { if (str.charAt(start) != str.charAt(end)) { return false; } start++; end--; } return true; } public static void main(String[] args) { String str = "radar"; boolean result = isPalindrome(str); System.out.println(result); } }
Implement a function that takes a list of integers as input and returns the count of all even numbers in the list.	```java public class Main { public static int countEvenNumbers(List<Integer> input) { int count = 0; for (int num : input) { if (num % 2 == 0) { count++; } } return count; } public static void main(String[] args) { List<Integer> input = new ArrayList<>(); input.add(10); input.add(20); input.add(5); input.add(30); int result = countEvenNumbers(input); System.out.println(result); } }
Write a Java function that takes two lists of integers as input and returns a new list that contains only the elements common to both lists.	public List<Integer> findCommonElements(List<Integer> list1, List<Integer> list2) { List<Integer> commonElements = new ArrayList<>(); for (Integer element : list1) { if (list2.contains(element)) { commonElements.add(element); } } return commonElements; }
[truncated: 84 more rows]
