# Supplementary material
Source: ML conference proceedings conference paper supplement (https://openreview.net/forum?id=8mM5NzC7da)
Supplement: supplementary_material [file OOD_samples_llama-3-70b-instruct_math_augmented.xlsx]

## Sheet: Sheet
Questions
A factory produces 300 units of a product per day. What is the total number of units produced in 15 working days if the factory operates 5 days a week?
A cylindrical tank can hold 5000 liters of water. If the tank is 10 meters high, what is the radius of its circular base?
A person can paint a room in 4 hours and another person can paint the same room in 6 hours. How long will it take for both persons to paint the room together?
What is the perimeter of a triangle whose vertices are (-2,-1), (2,3), and (5,-2)?
A bakery sells 250 loaves of bread per day. If each loaf costs $2.50, how much does the bakery earn in a day?
A bakery makes 15 cakes in a batch, and each batch requires 10 eggs. If the bakery needs to make 450 cakes, how many eggs will it need?
What is the mode of the set {2, 3, 3, 4, 5, 5, 5, 6}?
A factory produces 240 units of a product in 4 hours. How many units does it produce per hour?
A box contains 6 black pens, 8 blue pens, and 4 red pens. If 2 pens are drawn at random, what is the probability that one pen is black and the other is blue?
What is the range of the dataset 12, 15, 18, 20, 25?
A car travels 300 miles in 5 hours. How many miles does it travel per hour?
A rectangular prism has a surface area of 360 square feet. If the length is 12 feet and the width is 6 feet, what is the height of the prism?
What is the midpoint of the line segment with endpoints (8,2) and (12,8)?
A bookshelf has 5 shelves, and each shelf can hold 8 books. If the bookshelf is currently empty, how many books can be placed on it in total?
A triangle has sides of 8, 5, and x. If the angle opposite the side of length 8 is 60°, what is the value of x?
If 15 workers can build 12 houses in 5 weeks, how many workers will it take to build 20 houses in 4 weeks?
What is the average of the numbers 5, 7, 9, and 11?
Sarah has 15 pounds of cherries and gives 3 pounds to her friend. What fraction of cherries does Sarah have left?
The length of a rectangle is 5 meters longer than its width. If the perimeter of the rectangle is 24 meters, what is its width?
A bakery sells 250 loaves of bread at $1.50 each and 100 bags of cookies at $2.50 each. What is the total amount of money the bakery makes?
A water tank can hold 120 liters of water. If 40 liters of water are already in the tank, how much more water can be added?
In a class of 30 students, 12 students are boys. What fraction of the class is composed of girls?
A book costs $15.00. If a 10% discount is applied, how much will you pay for the book?
A bag contains 12 red marbles, 8 blue marbles, and 4 green marbles. What is the probability that a randomly drawn marble is blue?
A car travels 250 miles in 5 hours. How many miles does it travel per hour?
John has 18 boxes of markers, each containing 30 markers. If he wants to share them equally among 9 students, how many markers will each student get?
Rachel has been monitoring the stock market and notices that a particular stock prices increases 2 out of every 5 days. What is the probability that it will decrease on 2 out of 3 days given that it increased the previous day?
A bag contains 15 yellow pencils, 20 blue pencils and 10 red pencils. What is the probability of drawing a blue pencil?
A train travels from Station A to Station B at an average speed of 80 kilometers per hour. If the distance between the two stations is 320 kilometers, how many hours does it take for the train to travel from Station A to Station B?
Maria is making a rectangular swimming pool with a length of 20 meters and a width of 12 meters. If she wants to install a 3-meter wide deck surrounding the pool, what is the area of the deck?
A snail is at the bottom of a 20-foot well. Each day, it climbs up 3 feet, but at night, it slips back 2 feet. How many days will it take for the snail to reach the top of the well?
A group of friends want to share some candy equally. If they have 48 pieces of candy and there are 8 friends, how many pieces of candy will each friend get?
A shirt is on sale for 25 percent off its original price of 80. How much will you pay for the shirt?
A bookshelf has 5 shelves, and each shelf can hold 8 books. If the bookshelf is currently empty, how many books can be placed on it in total?
A bakery sells 120 loaves of bread per day. If they make a profit of $0.75 per loaf, how much profit do they make per day?
Rachel has 35 books on her shelf. She lends 7 to her sister and donates 5 to the library. How many books does Rachel have left?
A bakery has 200 pounds of flour. They use 80 pounds for making bread and 40 pounds for making cookies. How much flour is left for making cakes?
Eight machines can produce 120 toys in 15 minutes. How many toys can 5 machines produce in 12 minutes?
A fund has 10,000 dollars in savings. If they deposit 500 dollars every month and withdraw 200 dollars every 2 months, how much will they have in savings after 6 months?
A cyclist travels from town A to town B at an average speed of 20 km/h and returns at an average speed of 30 km/h. What is the average speed of the cyclist for the entire trip?
Alex has 18 stickers. He gives 2 stickers to his friend. How many stickers does Alex have left?
In a factory, the ratio of workers to machines is 3:5. If there are 120 machines in the factory, how many workers are there?
Sophia has $80 in her piggy bank. She saves $5 each week for 16 weeks. How much money will Sophia have in her piggy bank after 16 weeks?
If 2x - 3y = 11 and 4x + 2y = 17, what is the value of x?
A box has 8 identical balls: 3 red, 2 blue, and 3 green. What is the probability of randomly selecting a blue ball?
A car travels from City A to City B, a distance of 420 kilometers, in 7 hours. What is the average speed of the car in kilometers per hour?
A bookshelf has 5 shelves, and each shelf can hold 8 books. If the bookshelf is currently empty, how many books can be placed on it in total?
A water tank can hold 1200 liters of water. If 300 liters of water are already in the tank, how much more water can be added?
What is the value of y in the equation y - 3 = 7?
A farmer has 150 apples and wants to package them in baskets that hold 10 apples each. How many baskets can the farmer fill?
A bookstore is having a sale and a customer wants to buy 5 books from the fiction section that costs $8 each and 2 books from the non-fiction section that costs $12 each. How much will the customer pay in total?
A rectangular garden has a length of 18 meters and a width of 12 meters. What is the perimeter of the garden?
A group of students want to share some money equally. If they have $120 and there are 10 students, how much money will each student get?
A car travels 250 miles in 5 hours. How many miles does it travel per hour?
A bakery sells 240 loaves of bread per day. They have 5 employees and each employee packs 8 loaves of bread per hour. How many hours does it take for the employees to pack all the loaves of bread?
A bookstore is having a sale on books. If a customer buys 3 books, they get a fourth book for 20% off. If the original price of each book is $10, what is the total cost of four books?
The rectangle in the diagram has a length of 8 cm and a width of 5 cm. What is the perimeter of the rectangle?
Alex can type a report in 5 hours and his colleague Michael can type the same report in 7 hours. If both Alex and Michael work together, how many hours will it take them to type the report?
A bicycle travels 240 miles in 8 hours. How many miles does it travel per hour?
A restaurant sells 40 sandwiches at $5.00 each. What is the total amount of money the restaurant earns?
A bakery sells 240 loaves of bread per day. How many loaves of bread does it sell in 5 days?
What is the probability that a randomly selected student in a class of 30 students is a boy, if the class has 12 boys and 18 girls?
A bookshelf has 12 shelves, and each shelf can hold 8 books. If the bookshelf is currently empty, how many books can be placed on it in total?
A farmer has 180 apples to pack into baskets. If he wants to put an equal number of apples into 12 baskets, how many apples will each basket hold?
A computer store has 120 laptops, 80 desktops, and 40 tablets on display. If 25% of the laptops, 15% of the desktops, and 5% of the tablets are sold, how many devices are left on display?
In a box of chocolates, 12 chocolates are filled with nuts and 8 chocolates are filled with caramel. If a chocolate is randomly selected from the box, what is the probability that it is filled with nuts?
A snail is at the bottom of a 20-foot well. Each day, it climbs up 3 feet, but at night, it slips back 2 feet. How many days will it take for the snail to reach the top of the well?
A bakery is making a special batch of cookies for a holiday. They need 2/3 cup of sugar for every 1 1/2 cups of flour. If they need 6 cups of flour, how many cups of sugar will they need?
If a car travels 250 miles in 5 hours, how many miles will it travel in 7 hours at the same rate?
A group of friends want to share some candy equally. If they have 48 pieces of candy and there are 8 friends, how many pieces of candy will each friend get?
A triangle has two angles measuring 30 degrees and 60 degrees. What is the measure of the third angle?
A car travels 240 miles in 4 hours. What is the average speed of the car?
A bakery sells a total of 250 loaves of bread on Monday and Tuesday. On Monday, they sold 30 more loaves than on Tuesday. How many loaves did they sell on Tuesday?
The perimeter of a rectangular picture frame is 36 inches. If the length is 6 inches more than the width, what is the width?
A water tank can hold 1200 liters of water. If 300 liters of water are already in the tank, how much more water can be added?
The surface area of a cube is 54 square inches. What is the length of an edge of the cube?
A water tank can hold 1000 gallons of water. If 250 gallons of water are already in the tank, what percentage of the tank is filled?
A car travels 250 miles in 5 hours. If it continues to travel at the same speed, how many miles will it travel in 2 hours?
A set of 4 identical rectangular prisms has a volume of 192 cubic units. What is the surface area of one prism?
A basketball team won 14 games last season and lost 6 games. If they won 4 more games this season than last season, what is their win percentage this season?
A bakery has 4 ovens and each oven can bake 12 cakes. If the bakery is currently not baking any cakes, how many cakes can they bake in total?
In a certain factory, it takes 5 machines 12 hours to produce 480 toys. How many toys can 8 machines produce in 15 hours?
A farmer has 18 bags of apples. Each bag contains 6 apples. How many apples does the farmer have in total?
A bicycle travels from School A to School B at an average speed of 20 km/h and returns at an average speed of 15 km/h. What is the average speed of the bicycle for the entire trip?
A library has 12 shelves and each shelf can hold 15 books. If the library currently has 120 books, how many more books can they add in total?
Alex has 18 basketballs in a bag. Each basketball weighs 3 kg. What is the total weight of the basketballs?
Sarah has 12 stickers in a book. If she gives 2 stickers to her friend each day, how many days will it take her to give away 8 stickers?
A bicycle travels from town A to town B at an average speed of 25 km/h and returns at an average speed of 30 km/h. What is the average speed of the bicycle for the entire trip?
The perimeter of a triangle is 54 cm. If the length of one of its sides is 18 cm, what is the length of the other two sides?
David has 24 pencils in a box. If he puts 4 pencils in each bag, how many bags can David fill with the pencils?
If a basketball team won 12 out of 20 games, what is the probability that they will win the next game?
A bakery produces 120 loaves of bread per day. If they operate 7 days a week, how many loaves of bread do they produce in a week?
A group of 15 students are sitting in a circle. What is the probability that two specific students are sitting next to each other?
A car rental agency has 20 cars and 12 of them are compact cars. What is the probability that a randomly selected car is not compact?
A rectangular garden has an area of 48 square meters and a length of 8 meters. What is the width of the garden?
Sarah can type 35 words per minute. How many words will she type in 17 minutes?
A bookshelf has 8 shelves, and each shelf can hold 9 books. If the bookshelf is currently empty, how many books can be placed on it in total?
A factory produces 220 units of a product in 4 hours. How many units does it produce per hour?
A rectangular garden has a perimeter of 44 meters. If the length is 8 meters more than the width, what is the width of the garden?
A store is having a sale where everything is 25% off. If a shirt originally costs $80, how much will it cost during the sale?
A cylindrical tank has a height of 10 feet and a radius of 2 feet. What is the volume of the tank in cubic feet?
In a circle, the measure of the central angle is 60 degrees, what is the length of the arc subtended by the central angle if the radius of the circle is 5 cm?
A Roulette wheel has 38 sections. If you place a bet that the section the ball lands on is odd, what is the probability the ball lands on an odd section?
A rectangular prism has a length of 6 cm, width of 4 cm and height of 8 cm. What is the length of the diagonal of the prism?
A bakery originally has 12 cakes, then they added 9 more cakes. How many cakes does the bakery have now?
The weight of a bag of sugar is 2 kilograms. The weight of a bag of flour is 4 kilograms. What is the ratio of the weight of the sugar to the weight of the flour?
A lemonade stand sells 50 cups of lemonade per day. If each cup of lemonade is sold for $1.25, how much money does the lemonade stand make in a day?
If Sarah has 18 pencils in her pencil case and she loses 3, how many pencils does Sarah have left?
What is the value of y that satisfies the equation 3cos(y) = 2?
A bookstore sells 120 books at $10 each and 70 magazines at $5 each. How much money did the bookstore make in total?
A snail traveled 120 meters in 6 hours. How many meters did it travel per hour?
A bakery sold 250 loaves of bread at $2.50 each. How much money did the bakery make in total?
A cylindrical tank has a radius of 5 meters and a height of 10 meters. What is the volume of the tank in cubic meters?
A group of friends want to share some candies equally. If they have 48 candies and there are 8 friends, how many candies will each friend get?
A person has $5,000 in a savings account earning 3% annual interest. How much money will the person have in 5 years?
What is the value of y in the equation 4y - 3 = 25?
If the radius of a circle is 4 cm, what is the circumference of the circle?
If 3 workers can finish a project in 12 days, how many days will it take 6 workers to finish the same project?
A doctor claims that 70% of the patients who took the new medicine were cured. What is the probability that a randomly selected patient who took the medicine will not be cured?
In a set of 75 employees, 40 are married, 35 have a bachelor's degree, and 20 are both married and have a bachelor's degree. What is the probability that an employee is either married or has a bachelor's degree?
If 10 cooks can prepare 120 meals in 3 hours, how many cooks will it take to prepare 300 meals in 5 hours?
A store sells a total of 500 units of product A and product B. If they sell 20 more units of product A than product B, and they sell 240 units of product A, how many units of product B do they sell?
A car travels from City C to City D at an average speed of 75 km per hour. If the distance between the two cities is 600 km, how many hours does it take for the car to travel from City C to City D?
A manufacturer sells 35 units of product X at $20 each. What is the total amount of money the manufacturer earns?
A cyclist travels from town E to town F at 80 km/h and returns at 60 km/h. What is the average speed for the round trip?
A bakery sells a total of 480 cookies on Monday and Tuesday. They sell 100 more on Monday than Tuesday. How many cookies did they sell on Tuesday?
In a stack of 60 blocks, 1/5 are blue, and 3/10 are red. How many blocks are neither blue nor red?
If 3 times a number is 24, what is the number?
A basketball team won 18 games and lost 12 games in a season. What is the ratio of games won to games lost?
In a rectangle, the length is 6 inches and the width is 4 inches. What is the perimeter of the rectangle?
A bakery has 24 loaves of bread to pack into boxes of 4 loaves each. How many boxes of bread can the bakery make?
If it takes 3 hours to walk 12 miles, how many miles can you walk in 5 hours at the same rate?
In a school, the ratio of teachers to students is 1:8. If there are 24 teachers, how many students are there?
The picture shows a set of blocks. What is the total number of blocks in the picture?
A car travels from city A to city B at an average speed of 60 miles per hour. How long will it take to travel 360 miles?
A bookstore has 250 books on a shelf. If 120 books are fiction and 35 books are biographies, how many books are left on the shelf that are not fiction or biographies?
A group of students are planning a trip to a theme park. If the total cost of the trip is $450 and there are 15 students, how much will each student have to pay for the trip?
A shirt is marked down 20% during a sale. If the original price of the shirt was $80, what is the sale price of the shirt?
A bakery is making a special batch of cookies. If the ratio of chocolate chips to peanut butter chips is 3:5, and there are 120 chocolate chips, how many peanut butter chips are there?
In a certain city, 25% of the population are seniors. If the total population is 50,000, how many seniors are there in the city?
A rectangular prism has a length of 8 cm, a width of 6 cm, and a height of x cm. What is the value of x if the volume of the prism is 288 cubic cm?
A bakery has 250 kg of flour. They need to package 15 kg of flour in each bag to supply a local market. How many bags can they fill?
12 friends want to share some money equally. If they have $456 to share, how much money will each friend get?
A spherical balloon has a diameter of 14 inches. What is the surface area of the balloon?
14 in base 9 is equal to what in base 10?
Mark can seat 20 people in each row of his movie theater and has 17 rows. How many people can Mark seat in total at one time?
The probability that a certain basketball player makes a shot is 0.75. What is the probability that he makes exactly 3 shots out of 5 attempts?
A water tank can hold 3000 liters of water. If 1200 liters of water are already filled in the tank, how much more water can be added to the tank?
A retailer offers a 25% discount on a $75 sweater. What is the sale price of the sweater?
A bakery sells a total of 480 muffins and cakes on a certain day. If the number of muffins sold is 120 more than the number of cakes sold, how many cakes were sold that day?
The ratio of the length of a rectangle to its width is 3:2. If the perimeter of the rectangle is 100 meters, what is the length of the rectangle?
A water tank can hold 1200 liters of water. If 3/5 of the tank is already filled and 300 liters of water is poured into it, what percentage of the tank is filled now?
A person can row a boat at a speed of 4 km/h in still water. If the speed of the river is 2 km/h, how long will it take the person to row 12 km upstream and return to the starting point?
The area of a circle is 16π square meters. What is the circumference of the circle?
A water tank can hold 1200 gallons of water. If 300 gallons of water are already filled in the tank, what percentage of the tank is filled?
The length of a rectangle is 7 cm and the width is 3 cm. What is the ratio of the perimeter to the area of the rectangle?
A bookshelf has 5 shelves, and each shelf can hold 8 books. If the bookshelf is currently empty, how many books can be placed on it in total?
A car travels 250 miles in 5 hours. How many miles does it travel per hour?
What is the mode of the dataset 1, 1, 2, 3, 4, 5, 5, 5?
If a rectangular garden measures 15 meters by 8 meters, what is the perimeter of the garden?
A bakery sells 45 cakes in the morning and 27 cakes in the afternoon. If they had 120 cakes in total, how many cakes are left unsold?
A car travels from city X to city Y at an average speed of 70 km/h and returns at an average speed of 50 km/h. What is the average speed for the entire trip?
The surface area of a cube is 294 square inches. What is the length of one side of the cube?
A bookstore has 12 shelves, and each shelf has 8 rows of books. If each row contains 5 books, how many books does the bookstore have in total?
Sarah has a rectangular garden that measures 10 meters by 8 meters. If she wants to put a fence around the entire garden, how many meters of fencing will she need?
A bakery is having a sale on bread. They offer 15% discount on all loaves. If a loaf of bread originally costs $2.50, how much will it cost during the sale?
A water tank can hold 60 liters of water. If 12 liters of water are already in the tank, how much more water can be added?
A car traveled 300 miles in 5 hours. How many miles did it travel per hour?
The length of a rectangle is 3 times its width. If the perimeter of the rectangle is 36, what is its width?
A group of 12 students are sharing some candy equally. If they have a total of 48 pieces of candy, how many pieces will each student get?
A book costs $15. If a 10% discount is applied, how much will the book cost after the discount?
A rectangle has a length of 8 cm and a width of 5 cm. What is the perimeter of the rectangle?
A water tank can hold 1200 liters of water. If 3/5 of the tank is already filled, how many more liters of water can be added?
A car is traveling from City X to City Y at an average speed of 75 km per hour. The distance between the two cities is 375 km. How long will the trip take?
A bookshelf has five shelves, and each shelf can hold 8 boxes. If the bookshelf is currently holding 20 boxes, how many more boxes can be added in total?
At a certain instant, Ship A is 10 kilometers due east of Ship B. If Ship A is moving east at 5 kilometers per hour and Ship B is moving north at 3 kilometers per hour, how fast are the ships moving apart at that instant?
What is the value of x in the equation cos(x) = 2/3?
What is the sum of all possible factors of the number 240, excluding 1 and 240?
The area of a square is increased by 69%. If the original area was 100 square meters, what is the length of one side of the new square?
A bakery has 3 ovens, and each oven can bake 12 cookies. If the bakery wants to bake 48 cookies, how many ovens will it need to use?
A group of 8 friends want to share some candy equally. If they have 48 pieces of candy, how many pieces will each friend get?
A car travels from City X to City Y at an average speed of 60 km per hour. If the distance between the two cities is 210 km, how many hours does it take for the car to travel from City X to City Y?
Sarah has 15 pencils in her pencil case. She gives 3 pencils to her brother and buys 7 more. How many pencils does Sarah have now?
A shirt is on sale for 20 percent off its original price of 180. How much will you pay for the shirt?
A bakery sells 200 loaves of bread per day at $2 each. How many dollars does the bakery earn in a day?
A bookshelf has 5 shelves, and each shelf can hold 8 books. If the bookshelf is currently empty, how many books can it hold in total?
A company hires 15 new employees, and each employee earns $4000 per month. How much will the company pay in salaries each month?
A car's fuel tank can hold 50 liters of gasoline. If the car uses 3/5 of a liter of gasoline per kilometer, how many kilometers can the car travel on a full tank?
A student scored 80, 70, and 90 on three exams, respectively. What is the student's average score?
A bookstore has 80 fiction books and 20 non-fiction books. If a customer randomly selects a book, what is the probability that the selected book is a fiction book?
A circle has a radius of 5 cm. What is the area of the circle?
Farah wants to buy 12 identical boxes of chocolates. Each box contains 20 chocolates and costs 5 dollars. How much will Farah pay in total?
Riya has 3 fewer toys than Rohan. If Riya has 11 toys, how many toys does Rohan have?
Five fair six-sided dice are rolled. What is the probability that at least two of the dice show the same number?
If {}x+2{}y={}9 and 3{}x-{}y={}, then what is the value of x-2y?
A boat travels 360 kilometers in 6 hours. How many kilometers does it travel per hour?
There are 12 boxes in a stack, and each box is labeled with a number from 1 to 12. If the sum of the numbers is 78, what number is on the 9th box?
In a rectangle, the length is 8 meters and the width is 5 meters. What is the perimeter of the rectangle?
A bookstore sells a total of 480 books per week. They sell a combination of fiction and non-fiction books. If they sell 80 more fiction books than non-fiction books, and they sell 240 fiction books, how many non-fiction books do they sell?
A student scored 85, 90, 78, 92, and 88 on five math tests. What is the student's average score?
A rectangular garden measures 15 meters by 8 meters. If a path that is 2 meters wide is built around the garden, what is the area of the path?
Mark has $25 in his wallet. He spent $12 on snacks and $8 on a toy, then he received $15 as a gift. How much money does Mark have now?
A train travels from city A to city B at a speed of 90 km/h and returns at a speed of 75 km/h. What is the average speed of the train for the entire trip?
A company claims that 70% of the surveyed people say that they prefer the company new product. What is the probability that a randomly selected person in the survey also prefers the company new product?
In a right triangle, the length of the hypotenuse is 15 and one of the legs is 9. What is the length of the other leg?
In a triangle, the measure of the third angle is 20 degrees more than the measure of the first angle. If the second angle is 60 degrees, what are the measures of the first and third angles?
A certain type of battery has an average lifespan of 4.5 years, with a standard deviation of 0.8 years. What percent of the batteries will last between 3.9 and 5.1 years?
What is the perimeter of the pentagon whose vertices are (0,0), (4,0), (6,4), (2,6), and (-2,-2)?
A bookstore sells 30 books at $25 each and 20 magazines at $8 each. What is the total amount of money the bookstore earns?
A factory produces 500 units of product A, 350 units of product B, and 200 units of product C per day. If the production capacity is increased by 20%, how many units of each product can the factory produce in a day?
A car travels from City A to City B at an average speed of 60 miles per hour. On the return trip, the car travels at an average speed of 80 miles per hour. What is the average speed of the car for the entire trip?
A group of friends want to share some candy equally. If they have 48 pieces of candy and there are 8 friends, how many pieces of candy will each friend get?
A rectangular swimming pool is 15 meters long, 8 meters wide, and 3 meters deep. If the pool is filled with water at a rate of 0.5 meters cubed per minute, how many minutes will it take to fill the pool?
A student has 12 hours to study for a math test. They plan to spend 20% of the time reviewing geometry, 30% reviewing algebra, and the rest reviewing trigonometry. How many hours will they spend reviewing trigonometry?
Amanda can make 12 cookies in 3 hours, and Emily can make 8 cookies in 2 hours. If they work together, how many hours will it take them to make 24 cookies?
A bookshelf has 5 shelves, with 8 books on each shelf. If 3 more books are added to each shelf, how many books are on the bookshelf now?
The distance from the school to the park is 18 miles. If Chris can walk 3 miles per hour, how many hours will it take him to walk to the park and back?
A bakery sells a total of 120 cakes on Tuesday and Wednesday. If they sold 20 more cakes on Wednesday than Tuesday, how many cakes did they sell on Wednesday?
Olga has 12 pencils in her bag and 5 more in her desk drawer. If she gives 2 pencils to her sister, what is the total number of pencils Olga has now?
A company sells a certain type of TV on a sale of 20% off the original price. If the original price is $1800, what is the sale price of the TV?
A car travels a distance of 240 miles in 4 hours. How many miles does it travel per hour?
A group of friends want to share 48 cookies equally. If there are 8 friends, how many cookies will each friend get?
A rectangular prism has a length of 8 cm, a width of 6 cm, and a height of 4 cm. What is the volume of the prism?
A survey shows that 70% of a certain school's students participate in sports. If there are 420 students in the school, how many students participate in sports?
Sofia can paint a room in 6 hours and her brother can paint the same room in 4 hours. If they work together, how long will it take for them to paint the room?
A book costs 25 dollars in one store and 30 dollars in another store. How much money will be saved by buying the book in the cheaper store?
A car travels 200 miles in 4 hours. How many miles does it travel per hour?
A rectangular swimming pool is 20 meters long and 15 meters wide. If the water is 3 meters deep, how many cubic meters of water are in the pool?
Alex has 12 more marbles than his friend. If Alex gives his friend 4 marbles, how many more marbles will Alex have than his friend now?
If it takes 8 hours to paint a house, how many hours will it take to paint 3 such houses?
From a bag containing 8 black marbles, 5 white marbles, and 2 red marbles, what is the probability of drawing a red marble or a black marble?
David scored 85, 95, and 75 on his last three English tests. What is his average score?
Emily can type 60 words per minute and her sister can type 40 words per minute. If both Emily and her sister work together, how many words can they type in 5 minutes?
A bookstore has 12 shelves of books. Each shelf has 18 books. How many books does the bookstore have in total?
Susan invested $5,000 at a 7% annual interest rate for 8 years. How much money will Susan have at the end of the 8 years?
Rachel has been saving 30 dollars each month for 12 months. If Rachel decides to buy a book that costs 400 dollars, how much more money will Rachel need to save?
The median of 7 consecutive integers is 14. What are the 7 integers?
A fair six-sided die is rolled 4 times. What is the probability that exactly two of the rolls result in a number greater than 3?
Olivia used 24 pencils to pack 4 boxes of pencils. How many pencils did Olivia use to pack each box?
Alex needs 2/5 pint of paint to paint a room. If Alex needs to paint 4 rooms, how much paint will she need in total?
A factory produces 1200 units of a product per day. How many units of the product will they produce in 10 days?
A cyclist travels from City A to City B at an average speed of 25 km/h and returns at an average speed of 30 km/h. What is the average speed for the whole trip?
A triangle has a perimeter of 24 centimeters. If two of the sides are 5 and 8 centimeters, what is the length of the third side?
In a rectangular prism, the length is 8, the width is 4, and the height is 2. What is the volume of the prism?
Rohan is trying to fill up his water tank. He currently has 300 gallons of water in the tank, but he needs 800 gallons to fill it up completely. If he adds 250 gallons of water to the tank, how many gallons more does he need to add?
A group of friends want to split a bill of $120 evenly. If there are 8 friends, how much will each person need to pay?
A car travels from City A to City B at a speed of 60 miles per hour. If the distance between the two cities is 240 miles, how long will it take to make the trip?
A rectangular garden measures 30 feet by 40 feet. If a path that is 5 feet wide is built around the garden, what is the area of the path?
A cylindrical can has a height of 10 inches and a radius of 4 inches. What is the volume of the can?
A baker is making 4 rows of cookies on a tray. If each row contains 12 cookies, how many cookies are there in total on the tray?
Two cars are traveling in the same direction. Car A is moving at a speed of 40 miles per hour, and Car B is moving at a speed of 20 miles per hour. If Car A starts 15 miles ahead of Car B, how long will it take for Car B to catch up to Car A?
Sarah has 12 boxes of crayons in the art room. Each box contains 24 crayons. If Sarah removes 4 crayons from each box, how many crayons will she have left in total?
A basketball team has won 8 out of the last 10 games they have played. What is the probability that they will win the next game?
In a jar, there are 24 red marbles, 16 blue marbles and 10 green marbles. What is the probability of choosing a blue marble at random?
Ryan has been saving money for a new video game and has $75. She wants to buy a video game that costs $95. How much more money does Ryan need to save?
A box contains 3 black pens, 5 blue pens, and 2 red pens. What is the number of ways to select 2 pens from the box if the pens are distinguishable?
A rectangle has a length of 8 meters and a width of 5 meters. What is the area of the rectangle?
Sarah invests $800 in a savings account that earns a 3% annual interest rate. How much will she have after 3 years?
A bookstore sells 120 books at $15 each and 80 magazines at $10 each. How much money did the bookstore make in total?
A bakery has 12 pots of flour. Each pot has 15 bags of flour. How many bags of flour does the bakery have in total?
Sarah can paint a room in 4 hours. If she works with her 2 friends, each friend works at the same rate as Sarah. How many hours will it take to paint the room?
Maria invested $1000 into a stock. The stock value increases by 25% in the first year and decreases by 15% in the second year. How much is the stock worth after the second year?
From a deck of 52 cards, what is the probability of drawing a card that is not a hearts or diamonds?
John can finish a video game in 8 hours. If he plays the game 2 hours a day, how many days will it take him to finish the game?
If 5 teams can complete a project in 6 days, how many teams will it take to complete the same project in 4 days?
In a right triangle, the length of the hypotenuse is 8 cm and one of the legs is 5 cm. What is the length of the other leg?
What is the value of y in the equation 2y - 3 = 7?
A car is moving at a speed of 55 miles per hour. If the car has to travel 220 miles, how many hours will it take to reach its destination?
In a bag of 20 balls, 12 balls are red, 6 balls are blue, and 2 balls are both red and blue. What is the probability that a ball drawn at random is neither red nor blue?
A snail moves at a pace of 0.02 km/h. How many kilometers will it travel in 24 hours?
A rectangular garden measures 15 meters by 8 meters. What is the perimeter of the garden?
A bookshelf has 12 shelves, and each shelf can hold 8 books. How many books can the bookshelf hold in total?
If a cake recipe requires 250 grams of sugar for 12 people, how many grams of sugar are needed for 36 people?
A car travels from city A to city B at 80 km/h and returns at 60 km/h. What is the average speed for the round trip?
In the coordinate plane, the line through (-2,5) and (3,-1) is parallel to the line through the points (2,b) and (-3,4). What is the value of b?
A bookstore sells 220 books at $5 each. How much money does the bookstore earn in total?
If Peter can ride his bike 5 miles in 1 hour, how many miles can he ride in 8 hours?
In a bag of 12 marbles, 2 are yellow, 5 are purple, and the rest are orange. What is the probability of randomly selecting an orange marble?
What is the value of y if 4y - 2 = 16?
In a house, the ratio of cats to dogs is 4:7. If there are 28 dogs in the house, how many cats are there?
The rectangle has an area of 20 square meters. If the length is 5 meters longer than the width, what are the dimensions of the rectangle?
Daniel has 40 stickers. If he gives 5 to his sister and 2 to his brother, how many stickers does Daniel have left?
If a triangle has angles of 30 degrees, 60 degrees, and x degrees, what is the value of x?
A bookshelf has 5 shelves, and each shelf can hold 8 books. If the bookshelf is currently empty, how many books can be placed on it in total?
A group of friends want to share some money equally. If they have $240 and there are 8 friends, how much money will each friend get?
A rectangular prism has a length of 8 cm, a width of 6 cm, and a height of 4 cm. What is the volume of the prism?
A certain company has 120 employees, 30 of which are managers. What percentage of the employees are managers?
A car rental company offers a daily rate of $40 per day plus an additional 25 cents per mile driven. If a customer drove 120 miles, what is the total cost of the rental?
In a certain basket, there are 36 apples. If 12 apples are taken out and 6 new apples are added, what percentage of the original apples are left?
A farmhouse has a total of 120 animals. The ratio of cows to pigs is 3:2. How many cows are there?
James can paint a house in 8 hours. If he works at the same rate, how many hours will it take him to paint 3 houses?
A book costs $25 and the discount is 15%. How much will you pay for the book after the discount?
A car travels a total distance of 540 miles. If it travels 30 more miles on Friday than on Thursday, and the distance it travels on Thursday is 180 miles, how many miles does it travel on Friday?
12 in base 9 is equal to what in base 10?
Mark has been collecting stickers for his stickers book and notices that it takes an average of 5 stickers to fill one page. If Mark wants to fill 12 pages, how many stickers will he need in total?
John is planning a trip from City X to City Y, which is 240 miles apart. If he drives at an average speed of 40 miles per hour, how many hours will the trip take?
A bakery sells an average of 120 loaves of bread per day. If a loaf of bread costs $2.50, how much will the bakery make in revenue each day?
A group of friends want to share some candy equally. If they have 48 pieces of candy and there are 8 friends, how many pieces of candy will each friend get?
A rectangular swimming pool is 15 meters long and 8 meters wide. If the water is 3 meters deep, how many cubic meters of water are in the pool?
A person has 15 bags of apples. Each bag has 20 apples. If the person gives away 5 apples to a friend, how many apples are left?
A factory produces 480 bottles of juice per hour. If the factory operates for 8 hours a day, how many bottles of juice will it produce in a day?
A person is driving from City A to City B at an average speed of 50 km/h. If the distance between City A and City B is 250 km, how long will it take the person to reach City B?
A library has 18 shelves of books. Each shelf has 15 rows of books and each row has 12 books. How many books are there in the library?
A cyclist travels from City A to City B at an average speed of 20 km/h and returns at an average speed of 30 km/h. What is the average speed of the cyclist for the round trip?
Tom has 25 balls and buys 7 more. How many balls does Tom have now?
If it takes 8 teams 4 days to print 800 posters, how many days will it take 12 teams to print 1200 posters?
Maria can clean a house in 3 hours, and Lucy can clean the same house in 2 hours. If they work together, how many hours will it take them to clean the house?
A factory has 240 machines, 40 of which are old and the rest are new. If 30 new machines are replaced, what fraction of machines are old?
What is the mean of the dataset 11, 13, 15, 17, 19?
A water tank has a capacity of 1000 liters and is being filled at a rate of 20 liters per minute. How many minutes will it take to fill the tank?
What is the mode of the set {2,4,6,2,8,4,6,2}?
A cube has a surface area of 150 square cm. What is the length of its side?
A car travels from City A to City B at an average speed of 60 km/h and returns at an average speed of 40 km/h. What is the average speed for the entire trip?
A cylinder has a diameter of 14 cm and a height of 10 cm. What is its volume?
A bookshelf has 12 shelves, and each shelf can hold 8 books. If the bookshelf is currently empty, how many books can be placed on it in total?
A group of friends want to share some money they earned from a garage sale. If they have a total of $240 and there are 4 friends, how much will each friend get if they divide the money equally?
A car rental company charges a base fee of $40 per day plus an additional $0.25 per mile driven. If a customer rents a car for 3 days and drives a total of 120 miles, how much will they need to pay in total?
A rectangular garden measures 15 meters by 8 meters. If a path that is 2 meters wide is built around the garden, what is the area of the path?
A student scored 72, 85, and 91 on three math tests. What is the average score on these tests?
Julia has 12 more books than her 25 dolls. If Julia gives 4 dolls to her sister, what is the difference between the number of books and dolls Julia has now?
A company has 20 employees, and the average salary is $60,000. If a new employee is hired with a salary of $80,000, what will be the new average salary?
The perimeter of a triangle is 21 inches, and two sides have lengths of 5 inches and 6 inches. What is the length of the third side?
A coffee shop sells a total of 240 cups of coffee and tea on a certain day. The number of tea cups sold is 40 less than the number of coffee cups sold. How many cups of coffee were sold on that day?
A rectangular prism has a length of 4 inches, a width of 3 inches, and a height of 5 inches. What is the volume of the rectangular prism?
A pizza parlor can make 25 pizzas in 3 hours, how many pizzas can it make in 9 hours?
David has 36 apples and he wants to share them evenly among 6 of his friends. How many apples will each friend get?
A bookstore has 8 shelves, and each shelf has 10 books. If the bookstore wants to increase the number of books by 25%, how many books will the bookstore have?
A plumber is fixing 4 pipes in 2 hours. How many pipes can the plumber fix in 6 hours?
If a plane travels 1200 miles in 4 hours, how many miles can it travel in 7 hours?
A certain fabric store sells a total of 350 yards of fabric on Monday. If the store sells 100 yards of fabric in the morning and 75 yards in the afternoon, how many yards of fabric were sold in the evening?
The area of a triangle is 72 square feet. If the base of the triangle is 8 feet, what is the height of the triangle?
A car drove 240 miles in 4 hours. If the car drove at a constant speed, how many miles did it drive per hour?
A bookshelf has 5 shelves, and each shelf can hold 8 books. If the bookshelf is currently empty, how many books can be placed on it in total?
A bottle of juice is 3/4 full. If 12 ounces of juice are added to the bottle, and the bottle can hold 32 ounces of juice, what fraction of the bottle is full now?
A cylindrical tank has a radius of 3 meters and a height of 6 meters. What is the volume of the tank?
A triangle has two sides with lengths of 5 cm and 7 cm, and the angle between them is 60 degrees. What is the length of the third side?
A sphere has a diameter of 12 inches. What is the surface area of the sphere?
A rectangular swimming pool has a length of 15 meters, a width of 8 meters, and an average depth of 2 meters. What is the volume of the pool?
A car travels from city A to city B at an average speed of 80 km/h for 2 hours, and then returns at an average speed of 60 km/h for 3 hours. What is the average speed of the car for the entire trip?
Alex has 2 times as many books as Emma. Emma has 8 books. How many books does Alex have?
There are 60 students in a class. If the ratio of boys to girls is 3:5, how many girls are there in the class?
If {}2x+{}3y=12 and {}x-{}2y=3, then what is the value of x-y?
A farmer has 480 apples to pack into baskets. If he can pack 16 apples into each basket, how many baskets can he fill?
In a deck of 52 cards, what is the probability of drawing a king or a queen from the deck?
The probability of a student passing a math test is 0.75. What is the probability that the student will not pass?
A rectangular prism has a length of 6 cm, a width of 4 cm, and a height of 3 cm. What is the volume of the prism?
A plane travels from City A to City B at an average speed of 500 km/h and returns at an average speed of 300 km/h. What is the average speed of the plane for the entire trip?
A company has 200 employees. Each employee is paid a salary of $50,000 per year. If the company hires 15 new employees, what is the new total salary?
A library has a total of 500 books. They have a combination of fiction and non-fiction books. If they have 100 more fiction books than non-fiction books, and they have 300 fiction books, how many non-fiction books do they have?
The surface area of a sphere is 100π square meters. What is the radius of the sphere?
A bakery sells a total of 45 pies during a holiday. If they sold 15 cherry pies, 10 blueberry pies, and some apple pies, how many apple pies did they sell?
The {} angle in an isosceles triangle is {} degrees. What is the {} ratio of the opposite side to the adjacent side?
A cylindrical tank can hold 400 cubic liters of water. If the height of the tank is 5 meters, what is the radius of the tank's base?
A car travels from City A to City B at an average speed of 80 kilometers per hour. If the distance between the two cities is 240 kilometers, how many hours did the car take to travel between the two cities?
A bookstore sells a total of 300 books per week. They sell a combination of fiction and non-fiction books. If they sell 20 more fiction books than non-fiction books, and they sell 140 fiction books, how many non-fiction books do they sell?
If a certain number is divided by 5, the remainder is 3. What is the remainder when the number is divided by 10?
How many triangles does a polygon with 8 sides have?
A music teacher wants to put 18 keyboards in 3 rows so that each row has an equal number of keyboards. How many keyboards will each row have?
A toy factory manufactures 40 toys at $12 each. What is the total amount of money the factory earns?
A farmer has 240 apples in a basket. He wants to put them in bags of 12 apples each. How many bags can he make?
In a circle, the length of the arc is 24 and the measure of the central angle is 60 degrees. What is the radius of the circle?
A dice is rolled 12 times and lands on the number 3 four times. What is the probability that it will land on the number 3 the next time?
A rectangular prism has a volume of 360 cubic inches. If its length is 6 inches, its width is 4 inches, and its height is unknown, what is the height of the prism?
A school has 300 students, 120 of whom are in the 9th grade, 100 of whom are in the 10th grade, and the rest of whom are in the 11th grade. If 15% of the 9th graders, 20% of the 10th graders, and 10% of the 11th graders are absent on a particular day, how many students are absent?
Lisa is 5 years older than her 3 siblings combined. If the age of the 3 siblings are 8, 5, and 2, how old is Lisa now?
In a bakery, 1/5 of the bread is baguette. If there are 40 breads, how many are baguette?
A luxury watch costs 3 times more than a regular watch. If the regular watch costs $100, what is the total cost of 2 luxury watches and 1 regular watch?
Mark has 18 cards in his wallet. He adds 7 more cards and then, he gives away 4 cards to his sister. How many cards does Mark have left now?
A farmer has 12 baskets of apples, each containing 5 apples. If he adds 2 more baskets containing 5 apples each, how many apples does he have now?
The height of a triangle is 3 less than its base. If the area of the triangle is 54 square feet, what is the length of its base?
A bookstore sells 120 books per week, and they make a profit of $5 per book. How much profit do they make in a month?
Tom can run 16 laps in 4 hours. How many laps can he run in 7 hours?
A plane travels from Airport A to Airport B at an average speed of 300 km/h and returns at an average speed of 200 km/h. What is the average speed of the plane for the entire trip?
The perimeter of a square is 32 inches. What is the length of each side?
What is the value of y in the equation 3y - 2 = 14?
A library has 240 books, 40 of which are fiction and the rest are non-fiction. If 20 non-fiction books are added, what fraction of books are fiction?
A box contains 8 red marbles, 4 blue marbles, and 2 yellow marbles. If one marble is drawn at random, what is the probability that it is yellow?
A store sells a total of 300 shirts and pants on Saturday. If the number of shirts sold is 180, how many pants were sold?
A circular swimming pool has a diameter of 20 meters. If a deck that is 2 meters wide is built around the pool, what is the area of the deck?
A bookshelf has 5 shelves, and each shelf can hold 8 books. If the bookshelf is currently empty, how many books can be placed on it in total?
In a rectangular garden, the length is 15 meters and the width is 10 meters. If a path that is 2 meters wide is built around the garden, what is the area of the path?
A bakery sells 250 loaves of bread per day. If they make a profit of $0.50 per loaf, how much profit do they make in a day?
A car travels from city A to city B at an average speed of 60 km/h and returns at an average speed of 40 km/h. What is the average speed for the round trip?
A water tank can hold 1200 liters of water. If 300 liters of water are already in the tank, how much more water can be added?
A jar contains 15 red marbles, 20 blue marbles, and 10 green marbles. What is the probability of drawing a green marble from the jar?
If Sara can paint a room in 4 hours, Tom can paint the same room in 2 hours, and Rachel can paint the same room in 6 hours, how long will it take for Sara, Tom, and Rachel to paint the room together?
A bakery sells 120 loaves of bread at $2 each. What is the total revenue of the bakery?
A water tank can hold 50 gallons of water. If a pipe fills the tank at a rate of 5 gallons per minute, how many minutes will it take to fill the tank?
Daniel has $50 to spend on snacks. If he buys 10 bags of chips at $2 each and 5 boxes of cookies at $5 each, how much money does he have left?
The cost of a pizza is directly proportional to its diameter. If an 18-inch pizza costs $18, how much would a 24-inch pizza cost?
A farmer has 300 meters of fencing and wants to fence a rectangular area with an existing barn as one of the sides. If the barn is 30 meters wide, what is the maximum area that the farmer can fence?
A group of friends want to share some candy equally. If they have 480 pieces of candy and there are 8 friends, how many pieces of candy will each friend get?
A car travels from City A to City B at an average speed of 40 km/h and returns at an average speed of 60 km/h. What is the average speed for the entire trip?
A cylindrical tank with a height of 10 meters and a radius of 4 meters is filled with water at a rate of 0.2 cubic meters per minute. How many minutes will it take to fill the tank?
A sequence of numbers is defined recursively as b(n) = 3b(n-1) + 2, where b(1) = 2. What is b(4)?
In a circle, the measure of the central angle is 60 degrees. If the length of the arc subtended by the angle is 4π cm, what is the radius of the circle?
A shirt is on sale for 20% off its original price of $120. How much will the shirt cost during the sale?
A jar contains 3 yellow balls, 5 black balls, and 2 white balls. If 2 balls are drawn at random, what is the probability that one is yellow and one is black?
What is the surface area of a cylinder that is 9 cm in diameter and 15 cm in height?
May has 12 bags of potatoes. Each bag has 4 potatoes. How many potatoes does May have?
If Sarah has 20 socks in her drawer and she buys 8 more pairs, how many socks will Sarah have in total?
Tom is trying to reach a target of 120 points in his game. If he has 80 points so far, how many more points does he need to score?
Ava has a collection of 8 identical notebooks. If she adds 2 more identical notebooks to her collection, what is the probability that a randomly selected notebook from her collection is one of the new notebooks?
Alex has 40 stickers in his sticker book originally. He adds 16 more stickers at the end of the day. How many stickers will Alex have in his sticker book at the end of the day?
What is the slope of a line that passes through the points (2, 5) and (4, 9)?
A bookshelf has 5 shelves, and each shelf can hold 8 books. If the bookshelf is currently empty, how many books can be placed on it in total?
The ratio of red cars to blue cars in a parking lot is 2:3. If there are 30 cars in the parking lot, how many blue cars are there?
A certain type of light bulb has an average lifespan of 10,000 hours, with a standard deviation of 500 hours. What percent of the light bulbs will last between 9,500 and 10,500 hours?
A farmer sells 120 bunches of bananas at $1.25 each and 80 baskets of apples at $2.50 each. How much money did the farmer make in total?
A bookstore has 350 books on its shelves. They have 50 more fiction books than non-fiction books, and they have 180 fiction books. How many non-fiction books do they have?
What is the probability that a fair coin lands on heads when it is flipped 5 times in a row?
A cube has an edge length of 7 cm. What is the volume of the cube?
Emily has $500 in her savings account. She withdraws $20 each week for 20 weeks. How much money will Emily have in her account after 20 weeks?
A box contains 8 green balls, 5 yellow balls, and 3 red balls. What is the probability that a randomly selected ball is yellow?
If 5x - 2 = 11, what is the value of x + 2?
A drawer contains 8 red socks, 12 blue socks, and 10 green socks. What is the probability of choosing a red sock?
A pipeline can fill a tank in 5 hours and another pipeline can fill the same tank in 3 hours. If both pipelines are opened, how many hours will it take to fill the tank?
A rabbit is at the bottom of a 15-foot hole. Each day, it jumps up 2 feet, but at night, it slips back 1 foot. How many days will it take for the rabbit to reach the top of the hole?
In a group of 40 students, 20 play basketball, 15 play soccer, and 10 play both basketball and soccer. What is the probability that a student plays soccer but not basketball?
What is the probability that a single coin toss results in heads?
Sara has 18 boxes of crayons, with 12 crayons in each box. If 20 crayons are taken away, how many crayons are left?
A bookstore sells a total of 180 books per day. They sell a combination of fiction and non-fiction books. If the ratio of fiction to non-fiction books is 2:3, how many fiction books are sold?
A triangle has two angles that measure 30 degrees and 60 degrees. What is the measure of the third angle?
A car travels from city A to city B at 80 km/h and returns at 50 km/h. What is the average speed for the round trip?
A bookshelf has 12 shelves, and each shelf can hold 8 books. How many books can the bookshelf hold in total?
A bakery sells a total of 480 loaves of bread per day. They sell a combination of whole wheat and white bread. If they sell 120 more loaves of whole wheat than white bread, and x represents the number of loaves of white bread, what is the total number of loaves of whole wheat bread sold?
A deck of cards has 52 cards, of which 13 are spades. If 2 cards are drawn at random, what is the probability that both are spades?
A water tank can hold 2400 liters of water. If 1200 liters of water are already in the tank, how much more water can be added?
What is the value of y if 4y - 2 = 16?
A bookstore has 12 shelves that need to be divided into 3 equal sections. In how many ways can the shelves be divided?
How many different ways are there to arrange the letters in the word FRIEND?
A rabbit is at the bottom of a 15-foot hole. Each day, it climbs up 2 feet, but at night, it slips back 1 foot. How many days will it take for the rabbit to reach the top of the hole?
A box contains {} balls. If we randomly select {} balls from the box, what is the probability that at least {} ball is blue?
Sarah has 24 stickers to pack into sheets of 4 stickers each. How many sheets of stickers can Sarah make?
A car travels from City A to City B at an average speed of 60 km/h. It travels back to City A at an average speed of 40 km/h. What is the average speed of the car for the whole journey?
A cylindrical tank with radius 10 cm and height 20 cm is filled with water at a rate of 2 cm^3/s. How long will it take to fill the tank?
A company sells two products, A and B. Product A costs $10 and Product B costs $20. If the profit on Product A is 20% and the profit on Product B is 30%, what is the total profit if 100 units of Product A and 50 units of Product B are sold?
A boy has 18 balls in his bag, of which 12 are red, 4 are blue, and 2 are green. What is the probability that he picks a blue ball?
A rectangular garden measures 15 m by 10 m. A path of width 2 m is built around the garden. What is the area of the path?
A rectangular prism has dimensions 4 cm by 5 cm by 3 cm. What is the volume of the prism?
A bakery sells 25 loaves of bread at $2.50 each, and 50 cookies at $0.50 each. What is the total revenue of the bakery?
A bag contains 8 red balls and 12 blue balls. What is the probability that a blue ball is drawn randomly from the bag?
If a water tank can hold 1200 liters of water, and 3/5 of the tank is already filled, how many more liters of water can be added?
21 in base 9 is equal to what in base 10?
A bakery sells 240 loaves of bread every day. If it operates 7 days a week, how many loaves of bread does it sell in a week?
A rectangular swimming pool is 25 meters long and 15 meters wide. If the water is 3 meters deep, how many cubic meters of water are in the pool?
A company has 15 employees, and each employee earns a salary of $4,000 per month. If the company hires 5 more employees at the same salary, what will be the total monthly salary of all employees?
A car travels from City X to City Y at an average speed of 50 km/h and returns at an average speed of 70 km/h. What is the average speed of the car for the entire trip?
A computer has 16 GB of RAM and 128 GB of storage. If it is upgraded to 32 GB of RAM and 256 GB of storage, what percentage increase in storage capacity is achieved?
What is the value of y in the equation 4y - 2 = 14?
A bookshelf has 12 shelves, and each shelf can hold 8 books. If the bookshelf is currently empty, how many books can be placed on it in total?
A snail is at the bottom of a 20-foot well. Each day, it climbs up 3 feet, but at night, it slips back 2 feet. How many days will it take for the snail to reach the top of the well?
A rectangular garden measures 15 meters by 8 meters. If a path that is 2 meters wide is built around the garden, what is the area of the path?
A car travels from City C to City D at an average speed of 30 km/h and returns at an average speed of 50 km/h. What is the average speed of the car for the round trip?
If y - 2 = 9, what is the value of y + 2?
A box contains 5 blue balls, 8 red balls, and 2 green balls. What is the probability of drawing a blue ball?
Tom, Alex and Sam are running a bakery. Tom produces 150 loaves of bread per hour, Alex produces 100 loaves of bread per hour, and Sam produces 80 loaves of bread per hour. If they work together for 4 hours, how many loaves of bread do they produce?
A rabbit is at the bottom of a 25-foot burrow. Each day, it digs up 5 feet, but at night, it slips back 1 foot. How many days will it take for the rabbit to reach the top of the burrow?
What is the mean of the dataset 15, 20, 25, 30, 35?
Sam has 12 baskets of apples to pack into crates of 4 baskets each. How many crates of apples can Sam make?
A bookshelf has 5 shelves, and each shelf can hold 8 books. If the bookshelf is currently empty, how many books can be placed on it in total?
A bakery is making a special batch of cookies for a holiday sale. They need to package 36 cookies into boxes of 6 cookies each. How many boxes of cookies can the bakery make?
A rectangular garden measures 15 meters by 8 meters. If a path that is 2 meters wide is built around the garden, what is the area of the path?
A water tank can hold 1200 liters of water. If 300 liters of water are already in the tank, how much more water can be added?
A bookshelf has 5 shelves, and each shelf can hold 8 books. If the bookshelf is currently empty, how many books can be placed on it in total?
In a certain town, the population increases by 5% annually. If the current population is 80,000, what will it be in 2 years?
A rectangular prism has a length of 6 inches, a width of 4 inches, and a height of 2 inches. What is the total surface area of the prism?
A car travels 250 miles in 5 hours. If it travels at a constant speed, how many miles will it travel in 8 hours?
A cylinder has a diameter of 8 inches and a height of 12 inches. What is its volume?
Emily has 12 boxes of crayons in her art room. Each box contains 18 crayons. If she wants to put an equal number of crayons into 4 containers, how many crayons will each container hold?
A rectangular prism has a length of 6 inches, a width of 4 inches, and a height of 2 inches. What is the volume of the prism?
A car travels from city A to city B at an average speed of 40 miles per hour. On the return trip, the car travels at an average speed of 60 miles per hour. What is the average speed for the entire trip?
A triangle has angles of 40 degrees, 60 degrees, and x degrees. What is the value of x?
A zoo has a total of 120 animals, including lions, tigers, and bears. If the number of lions is 30 more than the number of tigers, and the number of bears is 20 less than the number of lions, how many tigers are there?
A bakery makes 240 cookies in a day. If they sell 24 cookies every hour, how many hours will it take to sell all the cookies?
What is the value of y if 4y + 3 = 15?
A rectangular prism has a length of 6 cm, a width of 3 cm, and a height of 4 cm. What is the volume of the prism?
A shirt is on sale for 15% off. If the original price was $80, what is the new price of the shirt?
A triangle has angles of 45, 60, and x degrees. What is the value of x?
James has 35 marbles in a bag. If he loses 7 marbles, what percentage of his marbles has he lost?
A company had a profit of $2500 in the first quarter. If their profit increased by 20% in the second quarter, how much was their profit in the second quarter?
A rectangular swimming pool is 15 meters long and 8 meters wide. What is the perimeter of the pool?
Mark is planning a road trip. He drives at an average speed of 60 miles per hour. How many hours will it take him to drive 360 miles?
A bakery sells a total of 500 loaves of bread per day. They sell a combination of whole wheat and white bread. If they sell 250 loaves of whole wheat bread, what percentage of the bread sold is white bread?
A bakery is making a batch of cookies for a holiday sale. If they need 2 1/4 cups of sugar for every 3 dozen cookies, how many cups of sugar will they need for 15 dozen cookies?
Tom wants to buy a new bike that costs $240. If he has already saved up $120 and plans to save $20 per week, how many weeks will it take him to save enough money to buy the bike?
A rectangular garden measures 10 meters by 5 meters. If a path that is 1 meter wide is built around the garden, what is the area of the path?
A water tank can hold 1200 liters of water. If 480 liters of water are already in the tank, how much more water can be added?
A bookshelf has 7 shelves, and each shelf can hold 5 books. If the bookshelf is currently empty, how many books can be placed on it in total?
Four identical dice are rolled, and the outcome is observed. What is the probability that exactly two of the dice show the same number?
A bakery sells 250 loaves of bread per day. If the bakery operates 7 days a week, how many loaves of bread will it sell in 4 weeks?
A car travels from city A to city B, covering a distance of 360 miles in 6 hours. What is the average speed of the car in miles per hour?
In a rectangular prism, the length is 8cm, the width is 6cm, and the height is 4cm. What is the volume of the prism?
A group of students have a set of 18 different books. What is the probability that a randomly selected book is a fiction book, given that 8 books are fiction and 10 books are non-fiction?
A car dealership is offering a 20% discount on all cars. If a car originally costs $40,000, what is the discount amount?
The area of a rectangular garden is 48 square meters. If the length of the garden is 8 meters, what is the width?
A student is trying to find the value of y in the equation y - 3 = 7. What is the value of y?
Tom invested $2000 in a stock that yields 5% annual interest, compounded quarterly. How much was his investment worth after 3 years?
A restaurant serves a total of 300 meals per day. They serve a combination of breakfast and lunch meals. If they serve 50 more breakfast meals than lunch meals, and they serve 180 breakfast meals, how many lunch meals do they serve?
A factory produces 240 units of a product every hour. If the factory operates for 8 hours a day, how many units will it produce in a day?
A cylindrical tank with a height of 10 meters and a radius of 2 meters is filled with water at a rate of 0.5 meters per minute. How long will it take to fill the tank?
A car travels from city A to city B at an average speed of 80 kilometers per hour and returns at an average speed of 60 kilometers per hour. What is the average speed of the car for the entire trip?
What is the area of a triangle with a base of 9 inches and a height of 12 inches?
A student scored 72, 85, and 90 on three quizzes. What is the student’s average score on the three quizzes?
In how many ways can 8 students be seated in a row of chairs?
Samantha has 18 pencils and she gives 2 to her sister. If she wants to put the remaining pencils in boxes of 3 each, how many boxes can Samantha make?
A cube has an edge length of 5 inches. What is its surface area?
A shirt costs $40. They offer a 20% discount. How much will the shirt cost after the discount?
A vendor sells 36 cups of lemonade at $2.25 each. What is the total amount of money the vendor earns?
A rectangular garden has an area of 240 square meters. If the length of the garden is 16 meters, what is the width of the garden?
A bakery sells 250 loaves of bread per day. If the bakery operates 7 days a week, how many loaves of bread does it sell per week?
In a poll, 40% of voters said they would vote for candidate A. If 400 voters were surveyed, how many voters said they would vote for candidate A?
A library has 500 books, and 30% of them are checked out. How many books are currently being used by patrons?
A box of chocolates weighs 2.5 kilograms. If 12 boxes are packed into a crate, how many kilograms of chocolates are in the crate?
In a rectangle, the length is 7 cm and the width is 5 cm. What is the perimeter of the rectangle?
A bakery sells 25 loaves of bread, each selling at $2. What is the total revenue earned by the bakery?
What is the area of a circle with a radius of 14?
A bookshelf has 8 shelves, and each shelf holds 6 books. How many books can the bookshelf hold in total?
A car travels from City A to City B at an average speed of 60 km/h. If the distance between the two cities is 240 km, how long does it take for the car to travel from City A to City B?
A bookstore is having a sale on books. If they offer 25% discount on all books and a book costs $60, how much will you pay after the discount?
A bakery is making cookies for a holiday sale. If they need 1/4 cup of sugar for each cookie and they want to make 48 cookies, how many cups of sugar will they need in total?
A car travels from city A to city B at an average speed of 60 km/h. If it travels for 2.5 hours, how many kilometers will it travel?
What is the value of y in the equation 4y - 2 = 16?
A rectangular garden has an area of 120 square meters. If the length of the garden is 12 meters, what is the width of the garden?
Riya has 150 books. She lends 30 books to her sister and buys 10 more books. How many books does Riya have now?
A snail moves at a pace of 3 meters per hour. How many meters will it move in 24 hours?
What is the value of y if 5y - 2 = 13?
12 in base 8 is equal to what in base 10?
A cube measures 6 cm on each side. What is the surface area of the cube?
What is the number of even integers between 101 and 200?
A bakery is selling a package of 24 cookies. If Sarah buys 3 packages and gives 6 cookies to her friend, how many cookies does Sarah have left?
A cylindrical tank has a diameter of 12 inches and a height of 15 inches. If the tank is filled to a height of 8 inches, what is the volume of water in the tank?
A group of students are planning a road trip from City X to City Y. If the distance between the two cities is 360 miles and they are driving at a speed of 45 miles per hour, how many hours will it take them to reach City Y?
A reading room has 5 shelves with 8 books on each shelf. If 12 books are removed, how many books are left in the reading room?
A bookshelf has 15 shelves, and each shelf can hold 8 books. If the bookshelf is currently empty, how many books can be placed on it in total?
Alex plans to make a rectangular picture frame with a length of 12 inches and a width of 8 inches. If the frame is 2 inches wide, what is the area of the frame?
Olivia has $200 in her piggy bank. She saves $10 each week for 20 weeks. How much money will Olivia have in her piggy bank after 20 weeks?
A factory produces 200 toys per hour. If it operates for 8 hours a day, how many toys will it produce in 5 days?
Mr. Thompson can paint a house in 6 hours, and his assistant can paint the same house in 4 hours. If they work together, how many hours will it take them to paint the house?
Every week, Emma saves \$25 from her allowance. How much will she have saved after 8 weeks?
A bookshelf has 5 shelves, and each shelf can hold 8 books. If the bookshelf is currently empty, how many books can be placed on it in total?
A bakery sells a total of 500 loaves of bread per day. They sell a combination of whole wheat and white bread. If they sell 200 loaves of whole wheat bread, how many loaves of white bread do they sell?
A bicycle covers a distance of 12 kilometers in 30 minutes. How many kilometers will it cover in 2 hours?
A water tank can hold 1200 liters of water. If 300 liters of water are already in the tank, what percentage of the tank is already filled?
If the radius of a circle is 6 cm, what is the circumference of the circle?
A bus travels 240 miles in 4 hours. How many miles will it travel in 7 hours?
A store owner wants to package 48 toys into boxes of 6 toys each. How many boxes can he make?
In a right triangle, the length of the hypotenuse is 10 and one of the legs is 6. What is the length of the other leg?
What is the surface area of a sphere with a diameter of 12 inches?
A cube has a surface area of 150 square inches. What is the length of one side of the cube?
A bakery is producing a total of 450 loaves of bread per day. If the bakery operates at 9 machines, how many loaves of bread will it produce per machine?
A car travels from city A to city B at an average speed of 40 mph. If the distance between the two cities is 180 miles, what is the total travel time?
A company has a total of 25 employees, and each employee earns an average of $45,000 per year. What is the total annual salary of all employees?
A bookshelf has 5 shelves, and each shelf can hold 8 books. If the bookshelf is currently empty, how many books can be placed on it?
A cylindrical tank has a height of 6 meters and a radius of 4 meters. What is the volume of the tank?
A car travels from City A to City B at an average speed of 60 km/h and returns at an average speed of 40 km/h. What is the average speed for the entire trip?
A company has 15 employees, and 9 of them are male. What is the probability that a randomly selected employee is female?
In a triangle, the angles are in the ratio of 2:3:5. What is the measure of the smallest angle?
A group of friends want to share some money equally. If they have $480 and there are 8 friends, how much will each friend get?
A cube has a surface area of 150 sq cm. What is the length of one side of the cube?
A jar contains 12 red marbles, 8 blue marbles, and 10 green marbles. What is the probability that a randomly drawn marble is not blue?
A bike rental shop charges $20 per day plus $5 per hour. If a bike is rented for 3 days and 5 hours, how much will it cost in total?
A rectangular prism has a length of 6 cm, a width of 4 cm, and a height of 2 cm. What is the total surface area of the prism?
A pizza parlor sells large pizzas for $15 each and small pizzas for $10 each. If they sell 25 large pizzas and 30 small pizzas, what is their total revenue?
If the perimeter of a triangle is 25 cm, and two sides measure 8 cm and 9 cm, what is the length of the third side?
A bakery sells a total of 150 loaves of bread per day. They sell a combination of whole wheat and white bread. If they sell 30 more loaves of whole wheat than white bread, and each loaf of whole wheat costs $2, how much money does the bakery make from whole wheat bread per day?
A box has a length of 15 cm, a width of 8 cm, and a height of 10 cm. What is the surface area of the box?
A bicycle travels 35 miles in 2 hours. How many miles does it travel per minute?
A deck of cards contains 52 cards, of which 13 are spades. What is the probability that a randomly selected card is a spade?
In a triangle, the length of the base is 8 cm and the height is 12 cm. What is the length of the side adjacent to the 60 degree angle?
A box of chocolates weighs 0.5 kg and contains 24 pieces. How many kilograms of chocolates are there in 12 boxes?
A group of friends want to share some candies equally. If they have 48 candies and there are 8 friends, how many candies will each friend get?
A rectangular room measures 8 meters by 6 meters. If the walls are to be painted, and a gallon of paint covers 20 square meters, how many gallons of paint are needed to paint the walls?
A water tank can hold 1200 liters of water. If 300 liters of water are already in the tank, how much more water can be added?
A car travels from City A to City B at a speed of 75 km/h and returns at a speed of 90 km/h. What is the average speed for the round trip?
A rectangular bookshelf has 5 shelves, and each shelf can hold 8 books. If the bookshelf is currently empty, how many books can be placed on it in total?
Tom wants to buy a new TV that costs $1,200. If he has already saved $900, how much more money does he need to save?
A bakery sells 480 loaves of bread per day. If they package the bread in bags of 12, how many bags of bread do they sell in a day?
Tom invested 2000 dollars in a stock at a 3% annual growth rate. How much money will Tom have in 5 years?
In a class of 30 students, 4 students have glasses and 6 students have black hair. What is the probability that a randomly selected student has both glasses and black hair?
What is the perimeter of a rectangle with a length of 5 cm and a width of 3 cm?
A bakery sells 200 loaves of bread per day at 2 dollars each. How much revenue will the bakery generate in 20 days?
What is the value of y if 3y - 2 = 14?
A car travels from city A to city B at an average speed of 60 km/h. If the distance between the two cities is 300 km, how long does the trip take?
The area of a triangle is 36 square meters. If its height is 6 meters, what is its base?
A discount store is having a sale. If a shirt is discounted by 25% and its original price is $40, how much is the sale price?
A bookshelf has 5 shelves, and each shelf can hold 8 books. If the bookshelf is currently empty, how many books can be placed on it?
A container can hold 1200 cubic centimeters of water. If 300 cubic centimeters of water are already in the container, what percentage of the container is filled?
What is the mode of the dataset 3, 3, 5, 5, 5, 7, 9, 11?
What is the probability that a randomly selected student from a class of 30 students is born in June if 4 students in the class are born in June?
Tom has $85 to spend on a video game. The game costs $95, and Tom has a 10% discount coupon. Will Tom have enough money to buy the game?
Rachel can clean a house in 8 hours, and her friend can clean the same house in 6 hours. If they work together, how long will it take them to clean the house?
In a certain city, 25% of the population are seniors. If there are 400,000 people in the city, how many seniors are there in the city?
Vinay can paint 10 houses in 5 hours. How many houses can he paint in 12 hours?
There are 8 identical-looking books on a shelf, of which 2 are fiction novels. If 3 books are randomly selected, what is the probability that exactly 1 of them is a fiction novel?
A car travels from town A to town B at an average speed of 60 km/h and returns at an average speed of 40 km/h. What is its average speed for the entire trip?
A store sells 25 identical laptop bags at $20 each. If the store owner wants to make a profit of 25% on each bag, what is the cost price of one laptop bag?
2^2 × 2^3 = 2^x. What is the value of x?
What is the value of x in the equation cos(x) = 2/3?
A bicycle is on sale for 15% off its original price of $120. How much will you pay for the bicycle?
A cylindrical tank has a radius of 2 meters and a height of 6 meters. What is the volume of the tank in cubic meters?
A bakery sells 250 loaves of bread per day. If each loaf requires 0.5 kg of flour, how many kilograms of flour are needed per day?
A car travels from City A to City B at an average speed of 50 km/h and returns at an average speed of 30 km/h. What is the average speed of the car for the entire trip?
If y - 5 = 11, what is the value of y + 2?
What is the surface area of the sphere with radius 6 cm?
A bakery sells 250 loaves of bread per day. If they make a profit of $0.50 per loaf, how much profit do they make in a month with 30 days?
What is the equation of the line that passes through the points (3,4) and (-2,-3)?
A car travels 240 miles in 4 hours. How many miles will it travel in 7 hours at the same speed?
What is the median of the dataset 1, 2, 3, 4, 5, 6, 7, 8, 9?
A bookstore has 12 shelves of books. Each shelf can hold 18 books. If the bookstore is currently holding 15 books on each shelf, how many books are missing to fill all the shelves?
What is the value of y in the equation x - 3y = 12, given x = 9?
A class of 30 students took a math test. If 12 students scored A's, 8 students scored B's, and 5 students scored C's, what is the probability that a student scored a D or an F?
Alex has 8 bags of apples. Each bag contains 6 apples. How many apples does Alex have in total?
A rectangle has a length of 8 cm and a width of 5 cm. What is the perimeter of the rectangle?
A certain farmer harvests {} units of wheat every {} hour. How many units of wheat will the farmer harvest in {} hours?
In a circle, the length of the arc is 30 degrees. If the radius of the circle is 8 inches, what is the length of the arc?
A publishing company prints 500 books on a certain day. If the profit on each book is 15% of the selling price, and the selling price of each book is $20, what is the total profit of the publishing company?
A rabbit is at the bottom of a 15-foot hole. Each day, it jumps up 2 feet, but at night, it slips back 1 foot. How many days will it take for the rabbit to reach the top of the hole?
The perimeter of a rectangle is 50 and its length is 15. What is its width?
A bookshelf has 12 shelves, and each shelf can hold 8 books. If the bookshelf is currently empty, how many books can be placed on it in total?
A basketball team played 25 games and won 15 of them. What percentage of the games played did they win?
If a bicycle is on sale for 15% off its original price of $120, how much will you pay for it?
The area of a rectangular garden is 120 square meters. If the garden is 12 meters long, what is its width?
A water tank can hold 3000 liters of water. If 250 liters of water are already in the tank, how much more can be added?
A trapezoid has bases with lengths 5 meters and 10 meters, and a height of 6 meters. What is the area of the trapezoid?
If {}2x+3y={}9 and {}x-2y=-{}3, then what is the value of x-{}y?
A snack bar is selling hot dogs, hamburgers, and fries at a ratio of 3:5:7. If there were 120 snacks sold, how many hamburgers were sold?
A square has a perimeter of 20 meters. What is the area of the square?
A cylindrical tank with radius 2 meters and height 6 meters is filled with water. What is the volume of the water inside the tank?
Alex has 240 pencils in a box. If he wants to put them in bags of 12, how many bags can he make?
A bakery sells a cake for 120 dollars. If they have a discount of 20 percent on all cakes, how much will you pay for the cake?
Emily can finish a task in 6 hours, and her brother can finish the task in 4 hours. If they work together, how many hours will it take them to finish the task?
What is the value of y if 2y - 3 = 7?
A bookshelf has 5 shelves, and each shelf can hold 8 books. If the bookshelf is currently empty, how many books can be placed on it in total?
Sophia invested $500 at an annual interest rate of 6%. How much will Sophia have after 5 years?
In the equation 5x - 2 = 13, what is the value of x?
The perimeter of a rectangle is 14 cm. If the length is 4 cm more than the width, what is its length?
A bakery sells 240 loaves of bread at $2 each and 150 cakes at $5 each. What is the total amount of money earned by the bakery?
A water tank can hold 8000 liters of water. If 3000 liters of water are already in the tank, how much more water can be added?
A bakery sells a total of 250 loaves of bread per day. If they sell a combination of whole wheat and white bread, and the ratio of whole wheat to white bread is 3:5, how many loaves of whole wheat bread are sold per day?
A water tank can hold 1200 liters of water. If 3/5 of the tank is already filled, how many more liters of water can be added to the tank?
Tom has 15 boxes of crayons, and he wants to put an equal number of crayons in 5 bags. If each box contains 24 crayons, how many crayons will each bag contain?
A car travels 420 kilometers in 6 hours. If it continues to travel at the same rate, how many kilometers will it travel in 9 hours?
A basket contains 12 red balls, 8 blue balls, and 4 green balls. What is the probability of picking a blue ball from the basket?
A tank can hold 1000 liters of water. If 3/5 of the tank is already filled with water, how many more liters of water can be added?
A group of friends want to go on a trip that is 240 miles away. If they drive at an average speed of 40 miles per hour, how many hours will it take them to reach their destination?
A rectangular garden measures 10 meters by 5 meters. If a path that is 1 meter wide is built around the garden, what is the area of the path?
A bicycle costs $150. If a 5% discount is applied, how much will the bicycle cost after the discount?
A rectangular prism has a length of 6 cm, a width of 4 cm, and a height of 2 cm. What is the volume of the prism?
Tom has 20 pencils in his pencil case. If he gives 4 pencils to his friend, how many pencils will Tom have left?
A car dealership is offering a discount of 15% on all cars. If the original price of a car is $20,000, how much will be the discounted price?
A basket contains 12 apples. If 2 apples are rotten, what is the probability that a randomly selected apple is not rotten?
A company has 12 machines that can produce 240 products per hour. If 4 machines break down, how many products will the remaining machines produce per hour?
A bookshelf has 5 shelves, and each shelf can hold 8 books. If the bookshelf is currently empty, how many books can be placed on it in total?
16 identical bottles are distributed among 4 different shelves. How many ways can this be done?
A rectangle has 4 sides with different lengths. How many permutations of sides are possible?
In a group of 20 people, 9 people can play chess and 11 people can play tennis. If 3 people can play both games, how many people can play at least one of the two games?
A book store has 8 shelves of books each containing 12 rows of books. If each row has 15 books, how many books does the store have in total?
A farmer sells 30 baskets of apples at $2.25 each. What is the total amount of money the farmer earns?
A bookshelf has 12 shelves, and each shelf can hold 8 books. If the bookshelf is currently empty, how many books can be placed on it in total?
A car travels 420 miles at a speed of 30 miles per hour. How many hours does it take to travel this distance?
A teacher has 36 pencils and gives 6 to each student. How many students received pencils if each student received an equal number of pencils?
A rectangular garden measures 15 meters by 8 meters. If a path that is 2 meters wide is built around the garden, what is the area of the path?
A factory produces 600 toys per hour. If it operates for 8 hours a day, how many toys does it produce per day?
Ashley has 12 more stickers than the 18 notebooks in her bag. If she gives 2 stickers to her sister, how many more stickers will Ashley have than notebooks?
A bakery sells 60 cupcakes in the morning and 20 cupcakes in the evening. If they make a profit of $0.5 on each cupcake, how much profit do they make in a day?
A water tank can hold 60 gallons of water. If 20 gallons of water are already in the tank, what percentage of the tank is still empty?
A group of friends want to share some candy equally. If they have 60 pieces of candy and there are 5 friends, how many pieces of candy will each friend get if they divide it equally?
A car travels 125 miles in 5 hours. How many miles will it travel in 8 hours at the same speed?
Sarah has 30 stickers in her sticker book. She gives 8 stickers to her friend and buys 12 more stickers. How many stickers does Sarah have now?
A bookstore sells 200 books on a certain day. If the profit on each book is 15% of the selling price, and the selling price of each book is $5, what is the total profit of the bookstore?
A group of classmates want to share some candies equally. If they have 72 candies and there are 9 classmates, how many candies will each classmate get?
A toy store sells 350 toys at $4 each. The total cost of producing the toys is $1200. How much profit does the toy store make?
The perimeter of a rectangle is 24 inches. If the length of the rectangle is 6 inches, what is the width?
In a geometric sequence, the first term is 2 and the common ratio is 3. What is the fifth term?
A rectangular prism has a volume of 120 cubic meters. If the length is 5 meters and the width is 4 meters, what is the height?
A car travels from city A to city B at an average speed of 60 kilometers per hour. On the return trip, the average speed is 40 kilometers per hour. What is the average speed for the entire trip?
Two cylinders have radii in the ratio of 2:3 and heights in the ratio of 5:4. What is the ratio of their volumes?
A parallelogram has a base of 7 centimeters and a height of 9 centimeters. What is the area of the parallelogram?
A water tank can hold 1200 gallons of water. If 480 gallons of water is already in the tank, how much more water can be added?
A group of 12 students want to share some candy equally. If they have 48 pieces of candy, how many pieces will each student get?
A bookshelf has 5 shelves, and each shelf can hold 8 books. If the bookshelf is currently empty, how many books can be placed on it in total?
A bicycle travels 45 miles in 3 hours. How many miles does it travel per hour?
A bakery has 18 boxes of cookies, and each box contains 12 packs of cookies. If each pack has 6 cookies, how many cookies does the bakery have in total?
A jar contains 8 yellow pencils, 4 black pencils and 2 red pencils. What is the probability that a yellow pencil will be drawn at random?
A factory produces 250 units of a product daily. If they operate 5 days a week, how many units do they produce in a week?
There are 15 girls and 20 boys in a class. What is the probability that a boy will be selected as the class representative?
Tom has 12 boxes of juice to deliver. If each box contains 8 bottles of juice, how many bottles of juice does Tom have to deliver?
A car travels 250 miles in 5 hours. How many miles does the car travel per hour?
A pen costs $3 and a notebook costs $2. If you have $10, how many sets of pen and notebook can you buy?
A bakery sells 250 loaves of bread per day. If they sell each loaf for $2, how much money do they make in a day?
A wheel rotates 360 degrees in 5 seconds. How many degrees does it rotate in 1 second?
A bookshelf has 5 shelves, and each shelf can hold 8 books. If the bookshelf is currently empty, how many books can be placed on it in total?
A car travels 120 miles in 2 hours. How many miles does it travel per hour?
A cube has an edge of 5 cm. What is the surface area of the cube?
A restaurant has 3 pizza ovens, and each oven has 4 shelves. If each shelf can hold 2 pizzas, how many pizzas can the restaurant hold in total?
There are 5 cats and 3 dogs in a house. If the average number of legs per animal is 3.8, how many legs do the dogs have in total?
A cylindrical tank has a height of 8 meters and a radius of 2 meters. What is the volume of the tank?
A bakery sells 250 loaves of bread per day. If it operates 7 days a week, how many loaves of bread does it sell in a week?
In a garden, 12 flowers bloom in 8 days. If they are planted in a special soil, how many flowers can bloom in 12 days if the rate of blooming increases by 30%?
Alex can assemble a bookshelf in 9 hours, and his brother, Jack, can assemble the same bookshelf in 12 hours. If they work together, how many hours will it take them to assemble 3 bookshelves?
A jar contains 15 red marbles and 25 blue marbles. If we randomly select 7 marbles from the jar, what is the probability that exactly 3 marbles are red?
If the perimeter of a rectangle is 40 cm, and the length is 12 cm, what is the width of the rectangle?
Sarah has 48 cookies in a jar. She gives 8 cookies to her friend and then bakes 20 more. How many cookies will Sarah have in the jar at the end of the day?
A car rental company charges a base rate of $50 per day plus an additional $0.25 per mile driven. If John rented a car for 3 days and drove 75 miles, how much did he pay in total?
A company is having a sale on laptops. A customer can buy 2 laptops for $1,800. How much would it cost to buy 4 laptops?
If a bookshelf has 5 shelves, and each shelf can hold 8 books, how many books can the bookshelf hold in total?
A farmer has 18 apple trees, and each tree produces 12 baskets of apples. If the farmer sells each basket for $5, how much money did the farmer make?
A rectangular swimming pool measures 15 meters by 8 meters. If a deck that is 2 meters wide is built around the pool, what is the area of the deck?
A cube has a surface area of 150 square inches. What is the length of one side of the cube?
A cylinder has a height of 8 cm and a radius of 2 cm. What is the surface area of the cylinder?
Rachel has 24 stickers. She gives 4 stickers to Alex and 2 stickers to Ben. What fraction of the stickers does Rachel have left?
A water tank can hold 3200 liters of water. If 1200 liters of water are already in the tank, what percentage of the tank is already filled?
A box contains 5 black pens, 8 red pens, and 3 blue pens. What is the probability that a randomly selected pen is not red?
The sum of two consecutive integers is 25. What is the greater of the two integers?
A cube has a surface area of 150 square centimeters. What is its edge length?
If 2x - 3y = 10 and x - 2y = -2, what is the value of y?
A bag contains 10 white balls, 5 black balls, and 2 red balls. What is the probability of drawing a ball that is not black?
The radius of a circle is 7 centimeters. What is its area?
A cube has a surface area of 294 square cm. What is the length of one side of the cube?
A salesperson sold 200 items in week one, 150 items in week two, and 250 items in week three. What is the average number of items sold per week?
A container has 50 liters of water. If 15 liters are withdrawn and 10 liters are added, what percentage of the original amount is left?
In a right triangle, if one angle is 30 degrees, what is the measure of the other acute angle?
In a library, the ratio of books to shelves is 15:3. If there are 45 shelves in the library, how many books are there?
A jar contains 7 yellow buttons, 2 red buttons, and 9 blue buttons. What is the probability that a randomly selected button is blue?
Tom has 3 groups of 5 boxes in his storeroom. Each box contains 2 cartons. How many cartons does Tom have in total?
In a rectangle, the length is 8 and the width is 5. What is the perimeter of the rectangle?
What is the value of y if 4y - 2 = 12?
In a library, there are 12 books on a shelf, how many ways can the librarian choose 5 books to display on a special stand?
What is the area of a circle with a radius of 7 cm?
A bakery sells 150 loaves of bread per day. If the bakery wants to package the bread in bags of 5 loaves each, how many bags can the bakery make?
What is the mode of the following set of data: 12, 15, 18, 12, 21, 19, 18, 15, 12?
In a game, Sara is rolling two dice. What is the probability that the sum of the numbers on the two dice is 7?
The probability of a college student owning a laptop is 0.85. What is the probability that a student does not own a laptop?
A rectangular garden has a length of 20 meters and a width of 5 meters. What is its perimeter?
A manufacturing company has three machines. Machine A produces 240 units per hour, Machine B produces 180 units per hour, and Machine C produces 120 units per hour. If all machines work together, how many units will they produce in 2 hours?
A bookstore sells a total of 350 novels and textbooks on a given day. The number of novels sold was 50 more than the number of textbooks sold. How many textbooks were sold?
In a certain city, 25% of the households have a pet dog. If there are 150 households in total, how many households have a pet dog?
Sarah has 15 books on her shelf. She buys 7 more books, then gives 3 books to her sister. How many books does Sarah have now?
A bicycle is on sale for 15% off. If the original price was $120, what is the sale price of the bicycle?
A baker is making a special batch of cookies. She needs to package 36 cookies into bags of 4 cookies each. How many bags can she make?
Alex, Ben, and Chris want to share some pencils equally. If they have 54 pencils, how many pencils will each person get?
A car is traveling from City A to City B. It travels 240 miles in 4 hours. How many miles does it travel per hour?
What is the area of a rectangle with a length of 6 cm and a width of 4 cm?
Tom has 12 pounds of apples and he wants to share them equally among 4 of his friends. How many pounds of apples will each friend get?
If a bakery is selling a dozen donuts for $8, how much would 3 dozen donuts cost?
A bookshelf has 5 shelves, and each shelf can hold 8 books. If the bookshelf is currently empty, how many books can be placed on it in total?
A cylinder has a radius of 3 cm and a height of 10 cm. What is its volume?
A bicycle travels from point A to point B at an average speed of 20 km/h and returns at an average speed of 30 km/h. What is the average speed of the bicycle for the entire trip?
A cube has a side length of 6 cm. What is the surface area of the cube?
A class of students scored an average of 85 points on a test. If the sum of the scores is 680 points, how many students are in the class?
What is the value of y if y - 3 = 11?
A train travels from Station A to Station B at an average speed of 50 km/h and returns at an average speed of 70 km/h. What is the average speed of the train for the round trip?
A library has 1500 books on its shelves. If the librarian adds 200 more books, what percentage increase is this?
A hotel has 12 floors and 20 rooms on each floor. If the hotel is fully booked, and 40% of the guests prefer a non-smoking room, how many guests will prefer a non-smoking room?
A factory produces 250 bottles of juice per hour. If it operates for 8 hours, how many bottles of juice are produced in that day?
A rectangle has a length of 12 cm and a width of 8 cm. What is the area of the rectangle?
A group of 6 friends – Alice, Bob, Chris, David, Emily, and Frank – are standing in a circle. If Chris is standing between Alice and Bob, and David is standing next to Emily, who is standing next to Frank?
A computer program is used to process a certain number of transactions. It can process 120 transactions in 3 hours. How many transactions can it process in 5 hours?
A triangle has angles of 50°, 70°, and y. What is the value of y?
A runner runs around a circular track at a speed of 8 km/h. If the track is 400 meters in circumference, how many minutes does it take him to complete one lap?
The average of 7 numbers is 35. If the average of 2 of the numbers is 20, what is the average of the remaining 5 numbers?
A rectangle has a perimeter of 60 cm. If the length is 5 cm more than the width, what is the length of the rectangle?
A rectangular garden measures 15 meters by 8 meters. If a path that is 2 meters wide is built around the garden, what is the area of the path?
A water tank can hold 1200 liters of water. If 300 liters of water are already in the tank, how much more water can be added?
A group of friends want to share some candy equally. If they have 48 pieces of candy and there are 8 friends, how many pieces of candy will each friend get?
A car travels from city X to city Y at an average speed of 75 km/h and returns at an average speed of 50 km/h. What is the average speed for the entire trip?
The perimeter of a triangle is 42 cm. If two sides of the triangle are 12 cm and 15 cm, what is the length of the third side?
Alex is making a square garden with a perimeter of 20 meters. If the length of one side is x meters, what is the value of x?
A clothing store has a sale of 20% off on all dresses. If a dress is originally priced at 120 dollars, how much will it cost after the sale?
There are 120 students in a class. 70 students passed a history test and 50 students passed a geography test. 20 students passed both tests. How many students did not pass either test?
A cafe sells 200 cups of coffee per day. If they make a profit of 0.2 dollars on each cup, what is their total profit per day?
A toy store sells a total of 240 toys and games on a certain day. The number of toys sold is 80 more than the number of games sold. How many games were sold on that day?
Maria has 3 boxes of pens. In each box, there are 8 packets of pens. In each packet, there are 5 pens. How many pens does Maria have in total?
A factory produces an average of 200 toys in 4 machines. How many toys does the factory produce in total?
In a bowl, there are 12 oranges, and in each orange, there are 6 segments. If 4 more oranges are added, how many segments are there in total?
A bakery sells an average of 15 cakes in 3 days. How many cakes did the bakery sell in total?
Olivia has 2 bags of candies. In each bag, there are 5 packs of candies. In each pack, there are 8 candies. How many candies does Olivia have in total?
Tom has 56 apples in a basket and he wants to distribute them equally among 7 of his friends. How many apples will each friend get?
A certain bookstore sells a novel for $25 and a biography for $18. If you buy 2 novels and 3 biographies, how much will you pay in total?
The area of a rectangular garden is 480 square meters. If the length of the garden is 24 meters, what is the width of the garden?
John is saving money for a new smartphone and he has $437 in his savings account. If the smartphone costs $579, how much more money does John need to save?
A bakery sells a dozen donuts for $6. If you buy 3 dozen donuts, how much will you pay in total?
A bakery sells a total of 250 loaves of bread per day. They sell a combination of whole wheat and white bread. If they sell 30 more loaves of whole wheat than white bread, how many loaves of whole wheat are sold?
A group of friends want to share some candy equally. If they have 48 pieces of candy and there are 8 friends, how many pieces of candy will each friend get?
In a right triangle, the measure of one angle is 30 degrees. If the side adjacent to this angle is 5 cm, what is the length of the hypotenuse?
A water tank can hold 1000 liters of water. If 350 liters of water are already in the tank, how many more liters can be added?
A car travels from city A to city B at an average speed of 75 km/h and returns at an average speed of 50 km/h. What is the average speed of the car for the entire trip?
In a circle, the measure of the arc is 120 degrees and the radius is 8. What is the length of the arc?
A car travels 240 miles in 4 hours. If the car continues to travel at the same rate, how many miles will it travel in 7 hours?
A coin is flipped 5 times and the results are H, T, T, H, T. What is the probability that the next flip will be heads?
A rectangular prism has a length of 6, a width of 4, and a height of 2. What is the volume of the prism?
A basketball team wins 70% of their games. If they play 25 games in a season, how many games will they win?
The average of 8 numbers is 40. If the average of 5 of the numbers is 35, what is the average of the remaining 3 numbers?
A bag contains 8 yellow marbles, 5 black marbles, and 3 red marbles. What is the probability of drawing a red marble from the bag?
A bookstore sells a total of 600 books and magazines on a certain day. The ratio of books to magazines is 2:3. How many magazines were sold?
A company sells 350 units of a product at $10 each. The total cost of producing the product is $2500. How much profit does the company make?
A company sells a total of 350 units of a product per day. They sell a combination of small and large products. If they sell 50 more units of large products than small products, and they sell 180 units of large products, how many units of small products do they sell?
A student has a collection of marbles with an average weight of 5 grams. If 5 more marbles with a weight of 7 grams each are added, what will be the new average weight of the marbles?
A bookstore sells a total of 180 books per week. They sell a combination of hardcover and paperback books. If the ratio of hardcover to paperback books is 2:3, how many paperback books are sold?
A rectangle has a length of 8 centimeters and a width of 5 centimeters. What is the perimeter of the rectangle?
A cylindrical tank has a diameter of 2 meters and a height of 3 meters. What is the volume of the tank?
A researcher claims that 60% of the surveyed people say that they use social media daily. What is the probability that a randomly selected person in the survey also uses social media daily?
Sarah buys 12 bags of apples. Each bag contains 4 apples. How many apples does Sarah buy in total?
Tom, Alex, and Jack have $120, $150, and $200 respectively. What is the total amount of money they have?
A parking lot has 10 rows of parking spaces, and each row can hold 7 cars. If the parking lot is currently empty, how many cars can park in total?
In a certain pattern of numbers, each number is obtained by adding 5 to the previous number. If the first number is 10, what is the 5th number in the pattern?
A store sells 18 boxes of pens at $2.50 each. What is the total amount of money the store earns?
A person travels from city A to city B at an average speed of 50 km/h and returns at an average speed of 30 km/h. What is the average speed of the person for the entire trip?
A sphere has a volume of 288π cubic meters. What is the radius of the sphere?
The area of a circle is 16π and its center is at (0, 0). What is the equation of the circle?
The length of a triangle is 10cm longer than its base. The perimeter of the triangle is 35cm. What is the length of the base of the triangle?
A factory produces 300 toys per hour, 200 toys per hour, and 150 toys per hour on three different machines. If machine A produces toys for 4 hours, machine B produces toys for 3 hours, and machine C produces toys for 2 hours, how many toys are produced in total?
What is the value of x in the equation 3x - 2 = 14?
What is the value of x in the equation 5x + 2 = 17?
Jack has 24 cookies, and he wants to place them equally in 6 jars. How many cookies will each jar hold?
If 5 machines can produce 20 toys in 3 hours, how many machines will it take to produce 30 toys in 4 hours?
Aisha has 8 more pencils than her 12 books. If Aisha adds 4 more pencils, what is the difference between the number of pencils and books Aisha has now?
A bookshelf has 5 shelves, and each shelf can hold 8 books. If the bookshelf is currently empty, how many books can be placed on it in total?
A group of students are planning a school event. If they want to set up 12 tables, and each table requires 6 chairs, how many chairs will they need in total?
The price of a sweater is $75. If Sara has a 20% discount coupon, how much will she pay for the sweater?
A car travels from City X to City Y at an average speed of 60 kilometers per hour. If the distance between City X and City Y is 360 kilometers, how many hours will the car take to cover the distance?
A cylindrical water tank can hold 4800 liters of water. If 3200 liters of water are already in the tank, what percentage of the tank is full?
What is the equation of the line that passes through the points (5,2) and (3,1)?
A water tank can hold 1200 liters of water. If 300 liters of water are pumped into the tank at a rate of 10 liters per minute, how many minutes will it take to fill the tank?
In a right triangle, the length of one leg is 8 cm and the length of the other leg is 15 cm. What is the length of the hypotenuse?
A box contains 8 red balls, 5 blue balls, and 3 green balls. What is the probability that a randomly selected ball is not blue?
A cube has a surface area of 150 square meters. What is the length of one side of the cube?
A bookshelf has 7 shelves, and each shelf can hold 8 books. If the bookshelf is currently empty, how many books can be placed on it in total?
A car travels from City A to City B at an average speed of 40 miles per hour. If the distance between the two cities is 120 miles, how many hours will the trip take?
A rectangular prism has a length of 5 inches, a width of 3 inches, and a height of 2 inches. What is the volume of the prism?
A snail is at the bottom of a 20-foot well. Each day, it climbs up 3 feet, but at night, it slips back 2 feet. How many days will it take for the snail to reach the top of the well?
A bag contains 12 red balls, 8 blue balls, and 4 green balls. If a ball is drawn at random from the bag, what is the probability that it is not blue?
A bookstore sells 240 books per week. If they make a profit of 2 dollars on each book, what is their total profit per week?
Rachel has 15 boxes of crayons. Each box contains 12 crayons. How many crayons does Rachel have in total?
If Alex can clean a room in 3 hours and her brother can clean the same room in 2 hours, how many hours will it take for both Alex and her brother to clean the room together?
A swimming pool measures 15 meters by 8 meters. If a deck that is 2 meters wide is built around the pool, what is the area of the deck?
Michael used 24 bags of coffee beans to make 4 cups of coffee. How many bags of coffee beans did Michael use to make each cup of coffee?
A bookshelf has 5 shelves and each shelf can hold 8 books. If the bookshelf is currently empty, how many books can be placed on it in total?
A group of friends want to share some money equally. If they have $120 and there are 8 friends, how much money will each friend get?
In a mathematics test, 7 students scored 80 points or higher, 12 students scored 70 points or higher, and 20 students scored 60 points or higher. How many students took the test in total?
A rectangular garden measures 15 meters in length and 8 meters in width. If a path that is 2 meters wide is built around the garden, what is the area of the path?
A water tank can hold 1000 liters of water. If 350 liters of water are already in the tank, how much more water can be added to the tank?
If a library has 300 books and adds 20 new books each week, how many books will it have after 5 weeks?
If a car's gas tank can hold 15 gallons of gas, and it travels 20 miles per gallon, how many miles can the car travel on a full tank of gas?
A bakery sells 120 loaves of bread at $2 each. If they want to increase their profit by 25%, how much should they increase the price of each loaf?
A rectangular swimming pool is 8 meters long and 5 meters wide. If the pool needs to be surrounded by a fence that is 1 meter wide, what is the area of the fence?
If a person can read 30 pages in 45 minutes, how many pages can they read in 1 hour and 15 minutes?
A rectangular prism has a length of 6 inches, a width of 4 inches, and a height of x inches. If the volume is 72 cubic inches, what is the value of x?
Priya has 120 points to spend on 8 identical tokens. If each token costs 12 points, how many points will Priya have left?
In a class of 40 students, 25 students like math, 20 students like science, and 10 students like both math and science. How many students do not like either math or science?
Samantha has 90 stickers. She puts 15 stickers on her first picture, 20 stickers on her second picture, and 10 stickers on her third picture. How many stickers does Samantha have left?
A bookstore sells 300 books at $15 each and 200 magazines at $5 each. How much money did the bookstore make in total?
A restaurant serves 250 cups of coffee on a certain day. If the profit on each cup is 25% of the selling price, and the selling price of each cup is $2, what is the total profit of the restaurant?
A publisher sells 550 books at $25 each and 800 magazines at $5 each. How much money did the publisher make in total?
A container holds 32 pounds of sugar. If 4 pounds of sugar are used to bake a cake, how many cakes can be baked?
A farm has 18 goats and 12 sheep. If the goats eat 2 times as much as the sheep, how many pounds of food will the goats and sheep eat in total if the sheep eat 10 pounds of food?
A bag contains 5 blue marbles, 3 red marbles, and 2 yellow marbles. What is the probability that a randomly selected marble is blue or yellow?
If it takes 5 hours to walk 20 miles, how many hours will it take to walk 30 miles?
A bookshelf has 5 shelves, and each shelf can hold 8 books. If the bookshelf is currently empty, how many books can be placed on it in total?
A fruit stand sells oranges in bags of 6 and apples in bags of 8. If a customer buys 2 bags of oranges and 1 bag of apples, how many pieces of fruit do they have?
A bakery produces 120 cookies per batch. If they want to package 12 cookies per box, how many boxes can they fill with a single batch of cookies?
A rectangular prism has a length of 8 cm, a width of 6 cm, and a height of 10 cm. What is the surface area of the rectangular prism?
If a bakery sells 120 loaves of bread per day, and each loaf costs $2.50, how much money does the bakery make in a day?
A car travels 360 km in 6 hours. How many kilometers does it travel per hour?
A cylindrical tank has a height of 5 meters and a radius of 2 meters. What is the volume of the tank in cubic meters?
A person invests $1000 in a savings account that earns 5% interest per year. How much money will the person have in the account after 2 years?
A rectangle has a perimeter of 40 meters. If the length is 8 meters, what is the width?
What is the value of x if x - 3 = 7?
A bakery sells 250 loaves of bread per day. If they make a profit of $0.50 on each loaf, how much profit do they make in a day?
A circle has a radius of 5 cm. What is the circumference of the circle?
A car is traveling at a speed of 60 km/h. How far will it travel in 2.5 hours?
Mark is planning a road trip from City A to City B. The distance between the two cities is 240 miles. If Mark has already driven 120 miles, what fraction of the total distance has he covered?
A rectangular swimming pool measures 30 meters by 20 meters. If a deck of width 3 meters is built around it, what is the area of the deck?
What is the value of y in the equation 4y - 2 = 16?
A triangle has two angles of 30 degrees and 60 degrees. What is the measure of the third angle?
Rachel has 24 packets of snacks to pack into boxes of 4 packets each. How many boxes of snacks can Rachel make?
In a set of blocks, 15 blocks have a height of 2 inches and 20 blocks have a height of 3 inches. What is the total height of all the blocks?
A cube has a surface area of 150 square inches. What is the length of one side of the cube?
A bike costs $800. They offer a 15% discount. How much will the bike cost after the discount?
A test has 4 sections. The average score of the first 2 sections is 70. The total score of all 4 sections is 280. What is the average score of the last 2 sections?
A library has 250 books on shelves. 30% of the books are fiction. How many non-fiction books are there on the shelves?
A tank can hold 3000 liters of water. If 1200 liters of water are already in the tank, how many more liters are needed to fill the tank?
A restaurant has a total of 120 chairs, divided equally among 8 tables. If each table can hold 8 people, how many customers can the restaurant hold in total?
A triangle has sides of length 5, 12 and x. If the perimeter of the triangle is 24, what is the value of x?
A bakery sells a total of 250 loaves of bread per day. They sell a combination of whole wheat and white bread. If they sell 30 more loaves of whole wheat than white bread, and they sell 110 loaves of whole wheat, how many loaves of white bread do they sell?
A car travels from City A to City B at an average speed of 40 miles per hour. On the return trip, the car travels at an average speed of 60 miles per hour. What is the average speed for the whole trip?
If 3x - 5 = 2x + 8, what is the value of x?
A water tank can hold 9000 liters of water. If 3000 liters of water are already in the tank, how much more water can be added?
What is the probability of drawing a queen from a standard deck of 52 playing cards?
What is the perimeter of a rectangle with a length of 8 meters and a width of 5 meters?
A train travels from Station A to Station B at an average speed of 80 km/h and returns at an average speed of 60 km/h. What is the average speed of the train for the entire trip?
If 6 students can type 300 words in 5 minutes, how many students will it take to type 420 words in 6 minutes?
A furniture store is having a sale on tables. If a customer buys 3 tables, they get a 4th table for 15% off. If the price of each table is $150, how much will a customer pay for 4 tables?
The volume of a sphere is 288π cm^3. What is its radius?
Peter has 18 boxes of pencils. Each box contains 8 pencils. How many pencils does Peter have in total?
A cyclist travels from Town A to Town B at an average speed of 30 km/h and returns at an average speed of 45 km/h. What is the average speed of the cyclist for the round trip?
A bakery sells 250 loaves of bread per day. If the bakery sells 30 more loaves on Saturday and Sunday, how many loaves are sold in total during the week?
What is the value of x if x^3 - 2x^2 - 5x + 6 = 0?
Ryan is a delivery driver, and he is paid $40 per hour. If he works for 7 hours on Monday, 5 hours on Wednesday, and 9 hours on Friday, how much will Ryan earn at the end of the week?
The perimeter of a rectangle is 32 and its width is 4. What is its length?
What is the median of the dataset 1, 3, 5, 7, 9?
A water tank can hold 600 gallons of water. Initially, it was filled to 60% of its capacity. How many gallons of water can still be added to the tank?
The perimeter of a rectangle is 36 cm. If the length is 12 cm, what is the width of the rectangle?
A bakery has 250 loaves of bread on Monday. On Tuesday, they receive 15% more loaves. On Wednesday, they sold 20% of the total loaves they had. How many loaves of bread are left on Wednesday?
A parallelogram has a base of 5 cm and a height of 7 cm. What is the area of the parallelogram?
A company has 8 departments and each department has 12 employees. How many employees does the company have in total?
A library has 10 books on history, 12 books on science, and 8 books on art. If 1 book is randomly selected from the library, what is the probability that the book is about art?
Alicia has a rectangular prism with a length of 5 meters, a width of 3 meters, and a height of 2 meters. What is the volume of the prism?
In an isosceles triangle, the length of one of the equal sides is 7. If the length of the base of the triangle is 3, what is the length of the altitude?
A toy store sells 150 balls at $3 each. How much money does the toy store make in total?
The perimeter of a rectangle is 24 and its length is 8. What is its width?
A farmer has 18 bags of apples. Each bag contains 12 apples. How many apples does the farmer have in total?
What is the value of y in the equation 3y + 2 = 17?
The area of a triangle is 30 square meters. If the base of the triangle is 5 meters, what is the height?
A group of friends want to share some money equally. If they have $144 and there are 8 friends, how much will each friend get?
A bookshelf has 5 shelves, and each shelf can hold 8 books. If the bookshelf is currently empty, how many books can be placed on it in total?
Adrian needs to buy 6 identical bags of potato chips. Each bag contains 24 chips and costs 2 dollars. How much will Adrian pay in total?
If tan(x) = 5/12, what is sin(x)?
A train travels from City A to City B at an average speed of 80 km/h and returns at an average speed of 60 km/h. What is the average speed of the train for the entire trip?
A triangle has angles of 45°, 60°, and x°. What is the value of x?
Sofia is making a circular garden with a diameter of 16 meters. If she wants to install a 1.5-meter wide path surrounding the garden, what is the area of the path?
A bakery sells 120 loaves of bread at $2 each. If they have 30 dollars to purchase flour, how much will they have left after buying flour that costs 5 dollars a bag?
In a rectangle, the ratio of the length to the width is 5:3. If the perimeter is 48, what is the length of the rectangle?
A group of 20 friends want to share some candy equally. If they have 480 pieces of candy, how many pieces will each friend get?
A bookshelf has 5 shelves, and each shelf can hold 8 books. If the bookshelf is currently empty, how many books can be placed on it in total?
A car travels 250 miles in 5 hours. How many miles will it travel in 7 hours at the same speed?
A book costs $150. A 12% discount is applied to the book. How much will the book cost after the discount?
A shoe factory produces 420 shoes per day. If each shoe is sold for $25, how much money does the factory make per day?
Sarah has 35 meters of fabric. She uses 7 meters to make a dress, 5 meters to make a shirt, and 8 meters to make a hat. How much fabric does she have left?
A farmer has 280 potatoes to sell. If he packs them in bags of 14 potatoes each, how many bags can he fill?
A plane travels from city X to city Y at an average speed of 300 km/h and returns at an average speed of 250 km/h. What is the average speed of the plane for the entire trip?
A company has 25 employees, and 15 of them have been with the company for more than 5 years. What is the probability that an employee has been with the company for more than 5 years?
A circle has a circumference of 36π. What is the radius of the circle?
A truck is traveling from city A to city B. It travels 120 miles in 3 hours. What is the average speed of the truck in miles per hour?
A bookshelf has 5 shelves, and each shelf can hold 8 books. If the bookshelf is currently empty, how many books can be placed on it in total?
A person wants to know the probability of drawing a king from a standard deck of 52 playing cards. What is the probability?
Tom has 12 boxes of pencils. Each box has 24 pencils. If he gives 4 pencils to his friend, how many pencils does Tom have left?
A car travels 360 miles in 6 hours. How many miles does it travel per hour?
In a rectangle, the length is 5 inches more than the width. If the perimeter is 34 inches, what are the dimensions of the rectangle?
If cos(x) = 2/3, what is tan(x)?
A group of friends want to share a prize of $480. They want to divide it in the ratio of 3:5. How much will each friend get?
Maria has 4 identical containers containing 5 identical cylinders. Each cylinder contains 2 identical tubes. How many tubes does Maria have in total?
Ben can load a truck in 5 hours, and his partner can load the same truck in 3 hours. If they work together, how long will it take them to load the truck?
A school has 12 students that need to be divided into 4 equal groups. In how many ways can the students be divided?
A restaurant sells 500 cups of coffee per day. If they make a profit of $0.25 per cup, how much profit do they make per day?
A survey shows that 90% of the respondents say that they enjoy hiking. What is the probability that a randomly selected person in the survey also enjoys hiking?
A coffee shop offers a 20% discount on all orders above 100 dollars. If John orders 120 dollars worth of coffee, how much will he pay after the discount?
A rectangular swimming pool measures 20 meters in length, 10 meters in width, and 2 meters in depth. If 30% of the pool is already filled, what is the volume of water still needed to fill the pool?
Ben is five years younger than Charlie. If the difference of their ages is 15, how old is Charlie?
A plane travels 1200 miles in 4 hours. How many miles does the plane travel per hour?
A bookstore sells 30 books at $20 each. What is the total amount of money the bookstore earns?
Sophia has 3 boxes of crayons. Each box contains 12 packets and each packet contains 8 crayons. How many crayons does Sophia have in total?
Olivia has 12 stickers in her collection. She buys 7 more stickers and gives 3 stickers to her brother. How many stickers does Olivia have now?
A group of 5 friends – Jack, Kate, Lily, Michael, and Nina – are standing in a line, and Lily is standing between Kate and Nina. If Michael is standing next to Jack, who is standing at the extreme right?
A group of students want to share some candy in the ratio 2:3:4. If they have 180 pieces of candy, how many pieces of candy will the student with the highest share get?
A library has 300 fiction books, 250 nonfiction books, and 100 poetry books on its shelves. If 25% of the fiction books, 20% of the nonfiction books, and 15% of the poetry books are borrowed, how many books are left on the shelves?
Ryan is two years older than Kate. If the sum of their ages is 30, how old is Ryan?
A book costs $25. If a 15% discount is applied, how much will you pay for the book?
Leo invested$80 in a stock that yields 10% interest per annum compounded annually. After how many years will Leo have $120?
Samantha has 10 more toys than her 8 friends. If Samantha gives 2 toys to each of her friends, how many toys will Samantha have left?
Tim is 5 more times as old as his 10-year-old younger brother. What is Tim's age?
In a school, 2/5 of the students are girls. If there are 240 boys, what is the total number of students?
A group of five friends went to a restaurant and the total bill came out to be 240 dollars. If they decided to split the bill equally, how much did each friend have to pay?
A bookshelf has 5 shelves and each shelf can hold 8 books. If the bookshelf is currently empty, how many books can be placed on it in total?
A car travels from city X to city Y at an average speed of 30 km/h and returns at an average speed of 50 km/h. What is the average speed of the car for the entire trip?
The perimeter of a rectangle is 28 meters. If the length of the rectangle is 10 meters, what is the width?
A bookstore sells 250 copies of a book at $20 each. The fixed cost is $5,000 and the variable cost is $8 per book. What is the profit?
A spherical ball has a radius of 4 inches. What is the surface area of the ball?
A pair of shoes is on sale for 20% off its original price of $120. How much will the shoes cost during the sale?
The perimeter of a triangle is 45 meters. If two sides of the triangle are 15 meters and 20 meters, what is the length of the third side?
A swimming pool is 25 meters long, 10 meters wide, and 2 meters deep. What is the volume of water in the pool?
Sam bought 5 packs of notebooks. Each pack has 11 notebooks. How many notebooks does Sam have in total?
A book and a toy together cost 2.50 dollars. The book costs 1.25 dollars more than the toy. How much does the toy cost?
A rectangle has a length of 14 inches and a width of 7 inches. What is the area of the rectangle?
Ms. Johnson has a library. She has 250 books and wants to put them on shelves of 15 books. How many shelves can she make?
Alex has 12 bags of apples. Each bag has 18 apples. How many apples does Alex have in total?
What is the measure of the angle in a right triangle with a hypotenuse of 8 inches and one leg of 5 inches?
John, Michael, and David are trying to save money. John saved $40, Michael saved $30, and David saved $60. What is the total amount of money they saved?
At a bookstore, 70% of the customers surveyed said that they liked reading novels. 30% of the 70% also said they would buy novels. If 150 customers were surveyed, how many customers would likely buy novels?
A survey shows that 25% of the residents in a town like sports. If 20 residents like sports, how many residents are there in the town?
Rachel used 15 cups of flour to bake 5 bread. How many cups of flour did Rachel use to bake each bread?
A car travels at 60 km/h. How far will it travel in 3 hours and 30 minutes?
A restaurant serves breakfast, lunch, and dinner. They serve 200 people for breakfast, 250 people for lunch, and 300 people for dinner. How many people do they serve in total?
A cube has an edge length of 5 cm. What is the volume of the cube?
A shirt originally costs $50, but it is on sale for 15% off. How much will you pay for the shirt during the sale?
A garden has 12 rows of flowers, and each row has 25 flowers. How many flowers are there in the garden?
A car dealership sells 120 cars per month. If they make a profit of $1,200 per car, how much profit do they make per month?
The rectangular prism in the diagram has a length of 8 cm, a width of 5 cm, and a height of 3 cm. What is its surface area?
A water tank can hold 3000 liters of water. If 1200 liters of water are already in the tank, how much more water can be added?
What is the perimeter of a rectangle that has a length of 9 cm and a width of 6 cm?
A bakery sells 48 dozen donuts per day. If each dozen costs $12, how much money does the bakery make per day?
Lisa has 25 bottles of juice. Each bottle contains 8 ounces of juice. If she drinks 12 ounces of juice, how many ounces of juice does Lisa have remaining?
12 identical toys are packed in 4 different boxes. How many ways can this be done?
A cyclist travels from Town A to Town B at an average speed of 50 km/h and returns at an average speed of 30 km/h. What is the average speed of the cyclist for the entire trip?
In a company, the ratio of male employees to female employees is 2:3. If there are 150 employees in the company, how many female employees are there?
David has 40 packets of coffee beans in the warehouse originally. He ordered 36 more to be delivered at the end of the week. How many packets of coffee beans will he have in the warehouse at the end of the week?
A cylindrical tank can hold 4400 liters of water. If the radius of the base of the tank is 7 meters, what is the height of the tank?
The cost of 5 kilograms of apples is $12. If the cost of 2 kilograms of bananas is $4, what is the cost of 1 kilogram of apples and 2 kilograms of bananas?
In a right triangle, the length of the hypotenuse is 10 inches. If the length of one leg is 6 inches, what is the length of the other leg?
A bookshelf has 5 shelves, and each shelf can hold 8 books. If the bookshelf is currently empty, what is the probability that a randomly selected shelf will have exactly 2 books after a total of 20 books are placed on the shelves?
A car travels from city A to city B at an average speed of 60 kilometers per hour and returns to city A at an average speed of 40 kilometers per hour. If the total travel time is 10 hours, what is the distance between city A and city B?
What is the value of y in the equation 3y - 2 = 14?
A bakery sells a loaf of bread for $2.50 and a bagel for $1.25. If the bakery sells 220 loaves of bread and 300 bagels, what is the total revenue?
A car travels from City A to City B at an average speed of 60 km/h and returns to City A at an average speed of 40 km/h. What is the average speed for the entire round trip?
A person deposits $1,500 into a savings account that earns 4% annual interest compounded annually. How much will the person have in the account after 5 years?
In a class of 25 students, 15 students are boys and the rest are girls. What is the probability that a randomly selected student is a girl?
A bakery has 250 loaves of bread, and they bake an additional 50 loaves every hour. How many loaves of bread will they have after 4 hours?
A cylinder has a radius of 4 cm and a height of 10 cm. What is the volume of the cylinder in cubic centimeters?
Out of 100 students, 70 play soccer, 50 play basketball, and 30 play both. What is the probability that a student plays neither sport?
A triangle has angles of 30° and 45°. What is the measure of the third angle?
A bookshelf has 8 shelves, and each shelf can hold 12 books. If the bookshelf is currently empty, how many books can be placed on it in total?
If a bakery sells 150 loaves of bread at $2 each and 50 loaves of bread at $1 each, how much money did the bakery make in total?
Ashley has 12 bags of apples. Each bag has 8 apples. If she gives 2 bags of apples to her brother, how many apples does Ashley have left?
In a rectangle, if the length is 8 and the width is 5, what is the perimeter of the rectangle?
A group of friends want to share some candy equally. If they have 48 pieces of candy and there are 8 friends, how many pieces of candy will each friend get?
A book costs $15. If a 10% discount is applied, how much will the customer pay for the book after the discount?
A bookstore sells books in packs of 5. If the store has 270 books to sell, how many packs can they prepare?
If Sarah can paint a room in 4 hours, and John can paint the same room in 6 hours, how long will it take for both of them to paint the room together?
A coffee shop sells coffee beans in bags of 2 pounds. If a customer wants to buy 18 pounds of coffee beans, how many bags will they need to buy?
Mia has 24 pencils, and she wants to share them equally among 4 of her classmates. How many pencils will each classmate get?
A factory produces 480 bags of snacks per hour. If the factory operates for 8 hours, how many bags of snacks will it produce in total?
A car is traveling at a rate of 60 miles per hour. If the car has already traveled 120 miles, how many hours has the car been traveling?
A rectangular prism has a length of 6 cm, a width of 4 cm, and a height of 8 cm. What is the surface area of the prism?
A group of friends want to share some candies equally. If they have 48 candies and there are 8 friends, how many candies will each friend get?
A worker can finish a task in 8 hours and a robot can finish the same task in 12 hours. If they work together, how many hours will it take to finish the task?
In a certain bookshelf, 25% of the books are fiction. If there are 100 books on the shelf, how many fiction books are there on the shelf?
A bakery has 15 boxes of cookies and wants to pack them into bags of 5 cookies each. How many bags of cookies can the bakery make?
A bookshelf has 12 shelves, and each shelf can hold 8 books. If the bookshelf is currently empty, how many books can be placed on it in total?
Juan runs 12 km east and 8 km north. How many km will he need to run to return to his starting point?
A group of 12 students want to sit in 4 rows of equal size. In how many ways can the students be seated?
12 in base 9 is equal to what in base 10?
Tom is planning a hiking trip from point A to point B. If the distance between point A and point B is 24 kilometers and he walks at a constant speed of 4 kilometers per hour, how many hours will he take to cover the distance?
The area of a rectangular garden is 30 square meters. If the width of the garden is 5 meters, what is the length of the garden?
A bus travels from city X to city Y at an average speed of 75 km/h and returns at an average speed of 50 km/h. What is the average speed for the entire trip?
In a survey of 80 students, 35 students liked reading books, 25 students liked watching movies, and 10 students liked both reading books and watching movies. How many students did not like either reading books or watching movies?
Asha can type 60 words per minute. If she types for 2 hours, how many words will she type in total?
A library has 800 books on its shelves. They add 120 new books and remove 40 old books. If each book costs $5, how much did the library spend on the new books?
In a box of chocolates, there are 18 chocolates in each row and 12 rows in total. If 24 chocolates are taken out, how many chocolates are left in the box?
Emily has $150. She spends $25 on a gift and $30 on a movie ticket. How much money does Emily have left?
A factory produces 300 toys per hour. If the factory operates for 8 hours, how many toys did the factory produce in total?
A train travels from Station A to Station B at an average speed of 80 km/h and returns at an average speed of 120 km/h. What is the average speed of the train for the round trip?
A certain delicate vase is valued at $2500. If it is sold at a 10% discount, how much will the buyer pay for it?
Five identical boxes are stacked one on top of the other. Each box is 2 meters tall. How many meters is the total height of the stack of boxes?
How many liters of water are needed to fill a rectangular tank of length 8 meters, width 6 meters, and height 2.5 meters?
In a school, 3/5 of the students are girls. If there are 270 girls, how many total students are there in the school?
Two trains, one traveling at a speed of 60 km/h and another at a speed of 90 km/h, are traveling in the same direction. If the first train travels 420 km, how far will the second train have traveled?
A bakery sells a total of 250 loaves of bread per day. They sell a combination of whole wheat and white bread. If they sell 30 more whole wheat loaves than white bread loaves, and each whole wheat loaf costs $1.50 and each white bread loaf costs $2.00, what is the total daily revenue from bread sales?
A car travels from city A to city B at an average speed of 60 km/h and returns at an average speed of 40 km/h. What is the average speed of the car for the entire trip?
What is the probability that a card drawn from a standard deck of 52 cards is a spade or a heart?
In a right triangle, the length of the hypotenuse is 17 cm and one of the legs is 8 cm. What is the length of the other leg?
A prism has a triangular base with angles of 30°, 60°, and x. What is the value of x?
In a group of 15 teachers, the number of ways to select a team of 5 teachers is?
A chef has 20 bowls of juice. She needs to put 7 cups of juice in each bowl to serve to a party of guests. How many cups of juice does the chef need?
What is the probability that the product of two 8-sided dice is 16?
A smartphone randomly selects a password of 4 digits. What is the probability that the password consists of only odd digits?
The perimeter of a right triangle is 50 and its height is 10. What is its base?
Tom has 18 bags of apples. Each bag contains 5 apples. How many apples does Tom have in total?
A coffee shop sells a total of 240 cups of coffee on a certain day. If the number of cups of coffee with cream is 80 more than the number of cups of coffee without cream, how many cups of coffee without cream were sold on that day?
A car is traveling from city A to city B at a speed of 60 miles per hour. If the distance between city A and city B is 240 miles, how many hours will it take for the car to reach city B?
A bookshelf has 5 shelves, and each shelf can hold 8 books. If the bookshelf is currently empty, how many books can be placed on it in total?
A factory produces 1200 units of a product per day. If the factory operates for 7 days a week, how many units of the product are produced in one week?
A bakery is making a special batch of bread. Each loaf requires 2 cups of flour. If they need 120 loaves for a special order and they have 240 cups of flour, how many loaves will they have left after the order?
A rectangular swimming pool is surrounded by a deck that is 3 feet wide. If the area of the deck is 72 square feet and the length of the pool is 10 feet, what is the width of the pool?
James and Thomas are hauling a stacked load of lumber weighing 2000 pounds. If they can each lift 200 pounds, and James lifts 20 pounds more than Thomas, how much does Thomas lift?
A furniture company makes two types of chairs: Type A and Type B. If the ratio of Type A to Type B is 3:5, and they make 480 chairs in total, how many Type B chairs do they make?
A car is traveling from city A to city B at an average speed of 60 km/h. Due to roadwork, the speed is reduced to 40 km/h for 20 km. How long will it take to cover the remaining 80 km at the original speed?
A certain type of shoe is on sale for 20 percent off its original price of 180. How much will you pay for the shoe?
A car travels 240 miles in 4 hours. How many miles does the car travel per hour?
A rectangular garden has an area of 300 square meters. If the length is 20 meters, what is the width of the garden?
There are 12 bags of apples. Each bag contains 10 apples. How many apples are there in total?
The area of a triangle is 24 square meters. If the height is 6 meters, what is the base?
A bakery produces 500 loaves of bread per day. If they operate for 7 days, how many loaves of bread do they produce in total?
A plane flies from city A to city B at an average speed of 80 km/h and returns at an average speed of 120 km/h. What is the average speed of the plane for the entire trip?
What is the value of y in the equation 2y - 4 = 6?
A rectangular prism has a length of 8 cm, a width of 6 cm, and a height of 10 cm. What is its volume?
The perimeter of a square is 32 cm. What is the length of one side?
A cyclist travels from city A to city B at an average speed of 25 km/h and takes a break for 30 minutes. If the total distance is 50 km, what is the total time taken?
A company sells 200 units of a product at $50 each. If they offer a 20% discount, how much revenue do they generate?
What is the value of z in the equation z/4 + 2 = 7?
A water tank can hold 4320 liters of water. If 360 liters of water are already in the tank, how much more water can be added?
In a class of 30 students, 12 are boys, 8 are girls who play soccer, and the rest are girls who do not play soccer. What is the probability of selecting a girl who does not play soccer?
A certain brand of light bulbs has an average lifespan of 12 months, with a standard deviation of 2 months. What percent of the light bulbs will last between 10 and 14 months?
A cyclist travels from City A to City B at an average speed of 25 km/h and returns at an average speed of 15 km/h. What is the average speed for the whole trip?
If it takes 8 hours to fill 3 tanks, how many hours will it take to fill 6 such tanks?
A box contains 6 red balls, 4 blue balls, and 2 green balls. What is the probability of drawing a ball that is not blue?
What is the surface area of a sphere with a diameter of 14 cm?
A car travels 240 miles in 4 hours, how many miles does it travel per hour, if it continues to travel at the same speed?
A pharmaceutical company produces two types of medicines, type A and type B. The company produces 500 units of medicine A and 300 units of medicine B per day. If the company operates 7 days a week, how many units of medicine will they produce in 3 weeks?
A fair six-sided die is rolled three times. What is the probability that the same number appears on all three rolls?
In a class of 30 students, 12 students like reading books, 10 students like playing video games and 5 students like both. What is the number of students who like neither reading books nor playing video games?
A car dealership has 25 cars in inventory. Each car costs $15,000. How much is the total value of the dealership's inventory?
A book costs $25. If a 10% discount is applied, how much will you pay for the book?
The width of a swimming pool is 10 meters less than its length. If the pool's perimeter is 40 meters, what is the area of the pool?
A company produces 300 pairs of shoes in a day. If each pair sells for $50, how much money does the company earn in a day?
A city claims that 60% of its residents use public transportation. What is the probability that a randomly selected resident also uses public transportation?
Tom can mow a lawn in 4 hours, while his brother can do it in 5 hours. If they work together, how long will it take for them to mow the lawn?
What is the value of y in the equation 2y - 3 = 5?
A rectangular prism has a length, width, and height of 6, 4, and 2 inches, respectively. What is the volume of the rectangular prism in cubic inches?
A car traveled 240 miles in 4 hours, how many miles will it travel in 7 hours at the same rate?
A bookshelf has 5 shelves, and each shelf can hold 8 books. If the bookshelf is currently empty, how many books can be placed on it in total?
A bicycle is priced at $50. If a 20% discount is applied, how much will the bicycle cost after the discount?
A bakery sells a total of 480 muffins and cakes on a certain day. If the ratio of muffins to cakes is 3:5, how many muffins were sold on that day?
A rectangular garden measures 20 meters by 15 meters. If a path that is 2 meters wide is built around the garden, what is the area of the path?
A group of friends want to share some money equally. If they have$240 and there are 8 friends, how much will each friend get?
A car travels from City A to City C at an average speed of 70 km/h and returns at an average speed of 50 km/h. What is the average speed of the car for the entire trip?
Leonard has a rectangular picture frame with a perimeter of 32 inches. If the length of the frame is 10 inches, what is the width of the frame?
A coffee shop is offering a discount of 20% on all drinks. If a coffee is originally priced at 40 dollars, how much will it cost after the discount?
There are 50 students in a class. 30 students like pizza and 20 students like sushi. 10 students like both pizza and sushi. How many students do not like either pizza or sushi?
A factory produces 1200 cars per month. If they make a profit of 2000 dollars on each car, what is their total profit per month?
Lucia has 3 more books than her 12 pens. If Lucia gives 1 book to her sister, what is the difference between the number of books and pens Lucia has now?
In the figure above, what is the value of y?
A square has a perimeter of 48 feet. What is the length of one side of the square?
Tom, Peter and Alex are installing a fence. Tom can install 150 feet of fencing per hour, Peter can install 100 feet of fencing per hour and Alex can install 80 feet of fencing per hour. If they work together for 3 hours, how many feet of fencing do they install?
If Michael can deliver 30 pizzas in 2 hours and David can deliver 20 pizzas in 2 hours, how many pizzas can they deliver together in 3 hours?
The area of a triangle is 27 square inches. If the base of the triangle is 6 inches, what is the height?
A bookstore has 18 shelves, and each shelf can hold 8 boxes of books. If the bookstore is currently holding 120 boxes of books, how many empty shelves are there?
A factory produces 2400 toy cars per day. If it operates for 7 days a week, how many toy cars will it produce in a week?
Riya has 3 bags of oranges. Each bag contains 12 baskets, and each basket contains 9 oranges. How many oranges does Riya have in total?
A group of friends want to share some money equally. If they have 210 dollars and there are 7 friends, including John, how much money will each friend get?
A triangular swimming pool has a base of 15 meters and a height of 12 meters. What is the area of the swimming pool?
John and Alex have a total of 35 marbles. John has 5 more marbles than Alex. How many marbles does Alex have?
A bookshelf has 5 shelves, and each shelf can hold 8 books. If the bookshelf is currently empty, how many books can be placed on it in total?
In a rectangle, the length is 6 and the width is 4. What is the perimeter of the rectangle?
A bakery sells a total of 450 loaves of bread per day. They sell a combination of whole wheat and white bread. If they sell 30 more loaves of whole wheat than white bread, and they sell 210 loaves of whole wheat, how many loaves of white bread do they sell?
A group of friends want to share some candy equally. If they have 48 pieces of candy and there are 8 friends, how many pieces of candy will each friend get?
Tom has 12 apples in a basket. If he give 2 to his brother and 2 to his sister, how many apples are left in the basket?
A car travels 150 miles in 3 hours. How many miles does it travel per hour?
There are 8 different flavors of ice cream at the parlor. How many different 3-flavor combinations can you make?
James has $150 in his savings account. If he deposits an additional $25 each month for 6 months, how much money will he have in total?
Tom has a collection of 75 stamps. He wants to put them into albums that hold 15 stamps each. How many albums can Tom fill?
A car travels 120 miles in 2 hours. How many miles does the car travel per hour?
A rectangular garden measures 15 meters by 8 meters. If a path that is 2 meters wide is built around the garden, what is the area of the path?
A group of friends want to share some candy equally. If they have 48 pieces of candy and there are 8 friends, how many pieces of candy will each friend get?
A cube has a surface area of 150 square centimeters. What is the length of one edge of the cube?
How far does an object travel in 5 seconds if it is accelerating at a rate of 2 meters per second squared?
What is the length of the shorter leg of a right triangle if the longer leg has a length of 12 and the hypotenuse has a length of 13?
A bakery sells 350 loaves of bread per week at $2 each and 150 pastries per week at $3 each. How much revenue does the bakery generate per week?
What is the equation of the circle with center (3,4) and radius 5 in the xy-plane?
An average air molecule travels at a speed of 400 meters per second. How far does it travel in one hour?
Sarah has 12 books on her bookshelf and Tom has 8 books on his bookshelf. What is the total number of books they have together?
A tank can hold 1000 liters of water. If 350 liters of water are already in the tank, what percentage of the tank is empty?
Three friends, Alex, Ben, and Charlie, want to go on a road trip together. Ben has 120 miles left on his car's gas tank, Alex has 210 miles left, and Charlie has 50 miles left. What is the total number of miles left on all three cars?
A shirt is on sale for 20% off, and the sale price is $48. What was the original price of the shirt?
A basket contains 15 apples, 20 bananas, and 5 oranges. What is the probability that a randomly selected fruit is an apple?
A bookshelf has 5 shelves, and each shelf can hold 8 books. If the bookshelf is currently empty, how many books can be placed on it in total?
A factory produces 1200 units of a product per day. If the factory operates 7 days a week, how many units will it produce in 4 weeks?
A rectangular garden measures 15 meters by 8 meters. If a path that is 1 meter wide is built around the garden, what is the area of the path?
A tank can hold 3000 liters of water. If 1200 liters of water are already in the tank, how much more water can be added?
A company has 3 departments, each with 8 employees. If each employee earns $4000 per month, what is the total monthly salary of all employees?
Tom, Alex, and Ben are loading boxes onto a truck. Tom loads 15 boxes per hour, Alex loads 10 boxes per hour, and Ben loads 8 boxes per hour. If they work together for 7 hours, how many boxes do they load in total?
The length of a rectangle is 4 cm more than its width. If the perimeter is 36 cm, what are the dimensions of the rectangle?
Rachel, Michael, and David are sharing some candy. Rachel gets 1/4 of the candy, Michael gets 1/3, and David gets the rest. If Rachel gets 12 pieces of candy, how many pieces did they start with?
A bakery sells a total of 480 muffins and cakes on Monday. The number of muffins sold was 2/5 of the total. How many cakes did the bakery sell?
A bookshelf has 12 shelves, and each shelf can hold 8 books. If the bookshelf is currently empty, how many books can be placed on it in total?
A rectangular garden measures 12 meters by 8 meters. What is the perimeter of the garden?
A bakery sells 250 loaves of bread at $2 each and 150 pastries at $3 each. What is the total revenue of the bakery?
A sphere has a radius of 6 centimeters. What is the volume of the sphere?
A person invests $2000 at an annual interest rate of 5%. How much will the person have after 2 years?
A factory has 8 machines that produce identical parts at a rate of 10 parts per hour. How many parts can the factory produce in 12 hours?
A box contains 8 yellow pencils, 5 black pencils, and 3 red pencils. If a pencil is drawn at random, what is the probability that it is yellow?
A bookstore sells 150 books per week. Each book costs $15. How much money does the bookstore make in a week?
The length of a swimming pool is 25 meters. The length of a football field is 50 meters. What is the ratio of the length of the swimming pool to the length of the football field?
In a right triangle, the length of the hypotenuse is 8 inches. If one angle is 45 degrees, what is the length of the side adjacent to the 45 degree angle?
A cyclist travels from town A to town B at 35 km/h and returns at 25 km/h. What is the average speed for the round trip?
Tom has 15 boxes of books. If each box contains 25 books, how many books does Tom have in total?
What is the equation of the line with slope 2 and y-intercept 3?
Sophia has 12 pairs of shoes. If she gives away 2 pairs, how many pairs of shoes does Sophia have remaining?
A rectangle has a length of 6 cm and a width of 4 cm. What is the area of the rectangle?
What is the value of y if 4y - 2 = 12?
A rectangular prism has a length of 6 cm, a width of 4 cm, and a height of 2 cm. What is the volume of the prism?
A group of friends went to the movies and each bought a large popcorn that contains 20 servings. If there are 5 friends and 4 popcorns left, how many servings were consumed?
Emily invested $5000 in a savings account that earns an annual interest rate of 5%. How much interest will Emily earn in 3 years?
A factory produces 1000 cars per day, and each car requires 300 pounds of steel. If the factory operates 6 days a week, how many pounds of steel are needed per week?
Alex has 15 boxes of pens to pack into cartons that hold 5 boxes each. How many cartons can Alex fill?
A snail is traveling at a rate of 2 meters per hour. If the snail needs to reach a point that is 12 meters away, how long will it take the snail to reach the point?
In a right-angled triangle, the length of the two legs are 5 meters and 12 meters. What is the length of the hypotenuse?
A company is selling {} units of a product at {} dollars each. How much revenue does the company generate if it sells all the units?
A cylinder has a height of 8 cm and a radius of 4 cm. What is the surface area of the cylinder?
In a city, 25% of the population are above 60 years old. If the total population of the city is 100,000, how many people are above 60 years old in the city?
A bookshelf has 5 shelves, and each shelf can hold 8 books. If the bookshelf is currently empty, how many books can be placed on it in total?
A rectangular garden measures 12 meters by 8 meters. If a path that is 1 meter wide is built around the garden, what is the area of the path?
A bakery sells 250 loaves of bread per day. They make a profit of $0.50 per loaf. How much profit does the bakery make in a day?
A group of friends want to share some candy equally. If they have 48 pieces of candy and there are 8 friends, how many pieces of candy will each friend get?
A car rental company charges a base fee of $40 plus an additional $0.25 per mile driven. If a customer drove the car for 120 miles, how much will they need to pay in total?
In how many ways can 8 different coins be arranged in a row?
The probability of drawing a 7 from a spinner with 10 numbers marked from 0 to 9 is p. What is the value of p?
A sequence of numbers is defined recursively as b(n) = 3b(n-1) + 2, where b(1) = 2. What is b(4)?
A bicycle travels 120 kilometers in 2 hours. How many kilometers does it travel per hour?
A person walks from Home to School at an average speed of 4 km/h and returns at an average speed of 6 km/h. What is the average speed of the person for the entire trip?
Tom and Lisa together have 48 books. Tom has 8 more books than Lisa. How many books does Lisa have?
A laptop and a printer together cost $1,500. If the laptop costs $1,200 more than the printer, how much does the printer cost?
A bakery sells 240 loaves of bread every day. If they sell each loaf of bread for $1.50 and spend 20% of their income on ingredients, how much do they spend on ingredients every day?
A company has 5,000 employees. If they increase their employees by 15% every 2 years, how many employees will they have in 6 years?
A car travels from Town A to Town B at an average speed of 50 km/h and returns at an average speed of 70 km/h. What is the average speed of the car for the round trip?
A farmer has 150 meters of fencing and wants to enclose a rectangular area with an existing barn as one side. If the barn is 30 meters wide, what is the maximum area the farmer can enclose?
If Tim can paint a room in 4 hours, and his brother can paint the same room in 6 hours, how long will it take for both of them to paint the room together?
A car travels from City A to City B at an average speed of 60 km/h and returns at an average speed of 40 km/h. What is the average speed for the entire trip?
A box contains 12 identical-looking candies, of which 4 are orange, 4 are blue, and 4 are green. What is the probability that two randomly selected candies are of different colors?
The prices of three shirts at a store are 15, 25, and 30 dollars. What is the median price of the shirts?
A factory produces 2000 units of a product per day. If the factory operates for 240 days per year, how many units are produced annually?
In a survey, 25% of respondents prefer brand A, 30% prefer brand B, and the remaining prefer brand C. What percentage of respondents prefer brand C?
A boat travels downstream at 12 km/h and upstream at 8 km/h. What is the speed of the current?
A rectangular garden measures 15 meters by 8 meters. If a path of uniform width is built around the garden, and the area of the path is 24 square meters, what is the width of the path?
In a right triangle, the length of the hypotenuse is 10 cm and one side is 6 cm. What is the length of the other side?
A bookshelf has 5 shelves and each shelf can hold 8 books. If the bookshelf is currently empty, how many books can be placed on it in total?
A car travels from city A to city B at a speed of 45 km/h and returns at a speed of 30 km/h. What is the average speed of the car for the entire trip?
For a group of 6 boys and 4 girls, how many ways can the group sit in a circular arrangement?
The perimeter of a square is 40 cm. What is its side length?
The area of a triangle is 24 and its height is 4. What is its base?
Samantha, a librarian, has 10 boxes of books in the library. Each box contains 6 packs of books, and each pack has 8 books. How many books does Samantha have in the library?
In a parking lot, there are 3 entrances and 2 exits. If 5 more entrances are added, and 2 more exits are added, how many entrances and exits does the parking lot have in total?
A triangle has vertices at (2,3), (4,6), and (8,9). What is the equation of the line that passes through two of the vertices of the triangle?
Sarah has 15 boxes of toys to pack into bags of 5 boxes each. How many bags of toys can Sarah make?
A coffee shop sells a total of 240 cups of coffee and tea on a certain day. The number of cups of coffee sold is 40 more than the number of cups of tea sold. How many cups of tea were sold on that day?
A water tank can hold 2400 liters of water. After filling it with 1500 liters, how many liters are left to fill?
Sara sells 45 books at $10 each. She also sells 20 magazines at $5 each. What is Sara's total revenue?
In a circle, the length of the arc is 2.5π and the radius is 5. What is the measure of the central angle?
A rectangular prism has a length of 6 cm, a width of 4 cm, and a height of 3 cm. What is the total surface area of the prism?
A car travels 120 miles in 2 hours. How many miles does it travel per hour?
A bus travels from City A to City B at an average speed of 30 km/h and returns at an average speed of 50 km/h. What is the average speed of the bus for the entire trip?
A car travels from City A to City C at an average speed of 50 km/h and returns at an average speed of 70 km/h. What is the average speed of the car for the entire trip?
The area of a rectangle is 50 units squared and the length is 10 units. What is the width of the rectangle?
A television is on sale for 20 percent off its original price of 350. How much will you pay for the television?
A boat travels from City A to City B at an average speed of 20 km/h and returns at an average speed of 30 km/h. What is the average speed of the boat for the entire trip?
The area of a circular garden is 144π square meters. If a path that is 2 meters wide is built around the garden, what is the area of the path?
A bookstore has 12 shelves, and each shelf can hold 8 books. If the bookstore already has 64 books, how many more books can it hold?
A bakery sells a total of 500 loaves of bread per day. They sell a combination of whole wheat and white bread. If the ratio of whole wheat to white bread is 3:5, how many loaves of whole wheat bread are sold per day?
A water tank can hold 1200 liters of water. If 3/5 of the tank is already filled, how many more liters of water can be added?
A bicycle is on sale for 15% off its original price of $80. How much will you pay for the bicycle during the sale?
Tim has 40 pounds of flour in a warehouse. He receives a new shipment of 12 pounds of flour every month for 5 months. How many pounds of flour does Tim have at the end of the 5 months?
What is the value of x if x^2 - 7x - 18 = 0?
A bakery produces 120 cakes in 2 hours. How many cakes does the bakery produce per hour?
Ryan and Matthew can together solve 18 puzzles in 6 hours. If Ryan can solve 2 puzzles in 3 hours, how many puzzles can Matthew solve in 3 hours?
A bag contains 20 apples, 15 oranges, and 10 bananas. What is the probability of randomly selecting an orange?
A pizza parlor sells a total of 180 pizzas on Fridays. They sell a combination of large and small pizzas. If they sell 20 more large pizzas than small pizzas, and they sell 100 large pizzas, how many small pizzas do they sell?
In a circle, the length of the arc is 12π and the radius is 6. What is the measure of the central angle in degrees?
A bookstore has 15 shelves, and each shelf can hold 8 boxes of books. If the store currently has 100 boxes of books, how many more boxes can they hold?
A car travels from city A to city B at an average speed of 60 km/h and returns at an average speed of 40 km/h. What is the average speed for the entire trip?
In a right triangle, the length of the hypotenuse is 10 and one of the legs is 8. What is the length of the other leg?
What is the value of x if 2x^2 + 5x - 3 = 0?
Alex has 12 boxes of chocolates. Each box contains 8 chocolates. If he gives away 20 chocolates, how many chocolates does Alex have remaining?
In how many ways can 7 different toys be arranged in a toy box?
What is the mode of the following set of data: 4, 6, 8, 4, 3, 6, 9?
A hospital claims that 90% of the patients recover from a certain disease within 3 days of treatment. What is the probability that a randomly selected patient also recovers within 3 days of treatment?
Tom has 12 bags of apples with 15 apples in each bag. If he gives 30 apples to his friend, how many apples does Tom have left?
A car travels 160 miles in 4 hours. How many miles will it travel in 6 hours at the same speed?
18 students are going on a field trip and each student needs 4 tickets for the event. If each ticket costs $5, how much will the total cost be?
A company has 18 employees and each employee earns $3,500 per month. If the company gives a 10% raise to each employee, how much will be the total salary paid by the company?
A bookstore sells 12 copies of a book at $18 each. If the bookstore adds a 10% sales tax to each book, how much will be the total amount paid by the customers?
A company has 20 employees and each employee is paid a weekly salary of $500. If the company raises the weekly salary by 15%, how much does the company pay its employees in total per week?
A customer purchased a laptop for $1200 and a tablet for $300. If the customer received a 10% discount on the laptop and a 20% discount on the tablet, what is the total amount paid by the customer?
A factory produces 500 units of a product per day. If the factory operates for 25 days in a month, how many units of the product does it produce in a month?
A bag contains 8 red marbles, 5 blue marbles, and 3 green marbles. If 2 marbles are drawn at random, what is the probability that one marble is red and the other is blue?
A library has 1500 books on its shelves. If 30% of the books are fiction, 25% are nonfiction, and the rest are poetry, how many poetry books are in the library?
There are 21 balls in a basket. 5 balls are yellow, 7 balls are red, and 2 balls are both yellow and red. How many balls are not yellow or red?
A bookshelf has 5 shelves. Each shelf can hold 3 boxes of books. Each box can hold 4 packets of books. Each packet can hold 2 books. If the bookshelf is currently empty, how many books can be placed on it?
Mark is two times older than his brother. If the sum of their ages is 24, how old is Mark?
If 5 more people attend the concert, there will be 35 people. If 2 people did not attend, there will be 28 people. How many people are attending the concert now?
Anna has 2 notebooks with 12 blank pages each. She writes 2 sentences on each page. How many sentences did Anna write in total?
A bookcase has 5 shelves, and each shelf can hold 12 boxes. How many boxes can the bookcase hold?
In a right triangle, the tangent of an acute angle is 8/3. What is the sine of that angle?
It takes 4 machines 6 hours to produce 1800 toys. How many hours will it take 3 machines to produce 1200 toys?
If Catherine can type 225 words in 5 minutes, and Olivia can type 270 words in 7 minutes, in how many minutes can Catherine and Olivia type 630 words if they work together?
The perimeter of a pentagon is 35 inches. If the length of one side is 7 inches, what is the sum of the lengths of the remaining sides?
A cylindrical tank has a capacity of 480 cubic meters. If the tank is 8 meters tall, what is the radius of the base?
A bookshelf has 3 books on the top shelf, 5 on the middle shelf, and 2 on the bottom shelf. If a book is randomly selected, what is the probability that it is not on the top shelf?
A triangle has angles of 30, 60, and x degrees. What is the measure of angle x?
A grocer has 12 crates of apples. Each crate has 15 apples. If 3 crates are sold, how many apples are left?
A rectangular prism has a length of 6 cm, a width of 4 cm, and a height of 2 cm. What is the volume of the prism?
A bookshelf has 7 shelves and each shelf can hold 5 books. If the bookshelf is currently empty, how many books can be placed on it in total?
A company produces 1200 units of a product per day. If the profit from each unit is 0.75 dollars, what is the total profit per day?
A rectangle has a length of 8 cm and a width of 5 cm. What is the area of the rectangle?
A family has 3 dogs and 5 cats. If they have to buy 2 pounds of food for each dog and 1 pound of food for each cat, how many pounds of food do they need to buy in total?
A car travels 400 miles in 8 hours. How many miles does it travel per hour?
Tom is twice as old as Pam. If the sum of their ages is 42, how old is Tom?
It takes 3 people to paint a house in 4 hours. How many hours will it take 2 people to paint the same house?
If 8 cookies are shared equally among 4 people, how many cookies will each person get?
What is the equation of the line that passes through the points (3,2) and (5,4)?
The perimeter of a triangle is 30 centimeters, and two of its sides have lengths 5 centimeters and 7 centimeters. What is the length of the third side?
What is the sum of the exterior angles of a regular hexagon?
A bakery is making a circular pizza with a circumference of 28 inches. If the radius of the pizza is 4 inches, what is the area of the pizza?
A bicycle travels from city X to city Y at an average speed of 20 km/h and returns at an average speed of 30 km/h. What is the average speed of the bicycle for the entire trip?
A rectangular prism has a volume of 180 cubic meters. If the length of the prism is 5 meters and the width is 4 meters, what is the height of the prism?
In a right triangle, the length of the hypotenuse is 8 and one of the legs is 5. What is the length of the other leg?
If a wheel rotates 15 times in two minutes, how many rotations will it make in 7 minutes?
A bookshelf has 12 shelves, and each shelf can hold 8 books. How many books can the bookshelf hold in total?
In a right triangle, the length of the hypotenuse is 8 inches. If one angle is 45 degrees, what is the length of the side adjacent to the 45 degree angle?
A bakery can produce 60 loaves of bread per hour. How many loaves of bread will it produce in 4 hours?
What is the surface area of a cube that has a side length of 5 inches?
If it takes 8 producers to produce 56 shirts in a day, how many producers are needed to produce 140 shirts in a day?
A chemistry beaker can hold 32 ounces of chemicals. If a chemist pours in 18 ounces of liquid and then adds 10 ounces more, how much more space is available in the beaker?
In a basketball game, 3/4 of the spectators came from School A and the rest came from School B. If 240 spectators came from School B, how many spectators were at the game in total?
Tim has 18 boxes of crayons. Each box contains 12 crayons. How many crayons does Tim have in total?
A book costs 25 dollars. If a 10% discount is applied, how much will the customer pay for the book?
A bookshelf has 5 shelves, and each shelf can hold 8 books. If the bookshelf is currently empty, how many books can be placed on it in total?
A car travels 250 miles in 5 hours. How many miles does it travel per hour?
A rectangular garden has a length of 10 meters and a width of 5 meters. If a path that is 1 meter wide is built around the garden, what is the area of the path?
A factory produces 500 units of a product per day. If the factory operates 7 days a week, how many units of the product will it produce in a week?
A group of friends want to share some candy equally. If they have 48 pieces of candy and there are 8 friends, how many pieces of candy will each friend get?
8 identical toys are distributed among 4 different boxes. How many ways can this be done?
Ms. Emma invested $3500 in a savings scheme which offers a 3% annual compound interest. How much will she have after 5 years?
A bicycle travels from town A to town B at an average speed of 20 km/h and returns at an average speed of 30 km/h. What is the average speed of the bicycle for the entire trip?
What is the length of the hypotenuse of a right triangle with legs of length 5 and 12?
A jar contains 3 yellow balls, 7 red balls, and 1 green ball. What is the probability that a randomly selected ball is not yellow?
A factory produces 2000 units of a certain product daily. If 30% of the units are rejected, how many units are accepted daily?
In a certain week, the mean of 6 examinations was 78. If the mark of the 7th examination was 85, what was the mean of the 7 examinations?
If x^2 + 2x - 6 = 0, what is the value of x - 1?
A total of 120 tickets were sold for a concert. The ratio of tickets sold in the morning to tickets sold in the afternoon is 2:3. How many tickets were sold in the afternoon?
In a circle, the length of the arc subtended by an angle of 120 degrees is 4π. What is the radius of the circle?
A bakery sells 250 loaves of bread per day. If they make a profit of $0.50 per loaf, how much profit do they make in a day?
A motorboat travels 12 km downstream in 2 hours and 8 km upstream in 2 hours. What is the speed of the current?
In a circle, the measure of the central angle is 45 degrees. If the length of the arc is 4.5 cm, what is the radius of the circle?
If Sally can paint a house in 6 hours and John can paint the same house in 4 hours, how long will it take for both of them to paint the house together?
A snail is at the bottom of a 20-foot well. Each day, it climbs up 3 feet, but at night, it slips back 2 feet. How many days will it take for the snail to reach the top of the well?
A bookshelf has 5 shelves, and each shelf can hold 8 books. If the bookshelf is currently empty, how many books can be placed on it in total?
A car is traveling 300 miles in 5 hours. What is the average speed of the car?
What is the perimeter of a rectangle with a length of 8 cm and a width of 5 cm?
Bob is 2 times as old as Alice. If Alice is 12 years old, how old is Bob?
What is the value of y if 3y - 2 = 14?
A bakery has 300 loaves of bread, 250 pastries, and 150 cookies on its trays. If 12% of the loaves of bread, 20% of the pastries, and 15% of the cookies are sold, how many items are left on the trays?
What is the value of y in the equation 4y - 2 = 16?
A cyclist rides her bike at a speed of 8 km/h for 2 hours. How many kilometers does she travel in total?
A company has 480 employees, and 120 employees are absent due to illness. What percentage of the employees are absent?
A bookshelf has 5 shelves, and each shelf can hold 8 books. If the bookshelf is currently empty, how many books can be placed on it in total?
A bakery sells an average of 250 loaves of bread per day. If the bakery operates for 25 days, how many loaves of bread will it sell in total?
A snail is at the bottom of a 20-foot well. Each day, it climbs up 3 feet, but at night, it slips back 2 feet. How many days will it take for the snail to reach the top of the well?
A class of students has an average grade of 85%. If the total of their grades is 1020, how many students are in the class?
A cylindrical tank has a radius of 4 cm and a height of 10 cm. What is its volume in cubic centimeters?
A basketball team has won 80% of its 30 games. How many games has the team won?
A library has 50 books on 5 shelves. If each shelf has the same number of books, how many books are on each shelf?
In a school, 400 students are divided into 16 classes. If each class has the same number of students, how many students are in each class?
If it takes 8 hours to complete a project, how many hours will it take to complete 4 such projects?
Sarah has 28 pencils in her pencil case originally. She bought 16 more to add to her collection. How many pencils will Sarah have in her pencil case now?
12 in base 5 is equal to what in base 10?
In a can of soda, the ratio of carbonated water to sugar is 5:2. If there are 14 grams of sugar in the can, how many grams of carbonated water are present?
Marcus has 480 stickers to distribute to 8 identical boxes. If each box can hold a maximum of 60 stickers, how many stickers will Marcus have left over?
A rectangular swimming pool has an area of 280 square meters. If the width of the pool is 8 meters, what is the length of the pool?
A bakery sells 420 loaves of bread per week. If they increase their production by 15%, how many loaves of bread will they sell per week now?
A train travels from Station A to Station B at an average speed of 80 km/h and returns at an average speed of 60 km/h. What is the average speed of the train for the entire trip?
If a book costs $15 and a 10% discount is applied, how much will the customer pay?
A bakery sells 250 loaves of bread at $2 each. If they make a profit of 25% on each loaf, how much profit will they make in total?
A person has $500 to invest and wants to earn a 5% annual interest. How much will they have after 5 years?
A rectangular garden has a length of 10 meters and a width of 5 meters. If a path that is 1 meter wide is built around the garden, what is the area of the path?
A car traveled from City A to City B at an average speed of 50 km/h and returned at an average speed of 70 km/h. What is the average speed of the car for the round trip?
A bakery sells 250 loaves of bread at $2 each on Mondays and 200 loaves at$1.5 each on Tuesdays. How much money does the bakery make in total on Mondays and Tuesdays?
If a car travels 300 km in 5 hours, how many kilometers will it travel in 8 hours at the same rate?
In a pair of dice, what is the probability that the sum of the numbers is 8?
What is the surface area of a cube with a side length of 5 cm?
A box contains 12 red balls, 8 blue balls, and 10 green balls. What is the probability of drawing a blue ball from the box?
24 in base 5 is equal to what in base 10?
In a parallelogram, the length of the base is 8 cm and the height is 6 cm. What is the area of the parallelogram?
A bookshelf has 5 shelves, and each shelf can hold 9 books. If the bookshelf is currently empty, how many books can be placed on it in total?
Tom can solve a puzzle in 3 hours, while his brother can do it in 4 hours. If they work together, how long will it take for them to solve the puzzle?
A rectangle has a length of 8 cm and a width of 5 cm. What is the perimeter of the rectangle?
In a right triangle, the length of the hypotenuse is 10 and one of its legs is 6. What is the length of the other leg?
A store is having a sale of 20 percent off its entire stock. If a shirt originally costs 80, how much will you pay for it?
How many integers between 10 and 50 are divisible by 2?
A group of 120 students were surveyed about their favorite fruits. 80 students like apples, 40 students like bananas, and 20 students like both. How many students do not like either?
The perimeter of a rectangle is 24 and its length is 8. What is its width?
A certain type of tree grows at a rate of 25% per year. If a tree is currently 40 feet tall, how tall will it be in 5 years?
A basketball team scores an average of 80 points per game. If they play 12 games, how many total points will they score?
What is the value of x in the equation 2x + 5 = 13?
A bookstore has 15 shelves, and each shelf can hold 30 books. If the bookstore is currently empty, how many books can be placed on the shelves?
A rectangular prism has a length of 8 cm, a width of 6 cm, and a height of 4 cm. What is the volume of the prism?
A bakery sells a total of 500 loaves of bread on Monday and Tuesday. On Monday, they sold 200 loaves. How many loaves did they sell on Tuesday?
A rectangular prism has a length of 6 cm, a width of 4 cm, and a height of 8 cm. What is its volume?
A snail is at the bottom of a 20-foot well. Each day, it climbs up 3 feet, but at night, it slips back 2 feet. How many days will it take for the snail to reach the top of the well?
A survey of 100 students in a school shows that 30 students like to read books, 25 students like to watch TV, and 10 students like to do both. What is the probability that a student likes to read books or watch TV?
A cylindrical tank with a radius of 3 meters and a height of 5 meters is filled with water. What is the volume of water in the tank?
A factory produces 500 toys per day, and each toy requires 2 units of energy. If the factory operates for 5 days, how many units of energy does it consume?
A square has a diagonal of 8 inches. What is the length of each side of the square?
A car travels 250 miles in 5 hours. If the car continues to travel at the same rate, how far will it travel in 7 hours?
A group of students want to share some pencils in the ratio 2:3:5. If they have a total of 80 pencils, how many pencils will each student get?
A new book costs 30. If a 10 percent discount is applied, how much will you pay for the book?
At a bookstore, 1080 books are packed in 24 boxes. If each box has the same number of books, how many books are in each box?
Three friends, Alex, Ben and Charlie, are working on a project. Ben works 4 hours, Alex works 2 hours and Charlie works 3 hours. If Ben earns $20 per hour, Alex earns $25 per hour and Charlie earns $18 per hour, how much do they earn in total?
A farmer harvests 450 apples from his orchard. He picks 1/6 of the apples from the north side, 1/4 from the south side and the remaining from the west side. How many apples did he pick from the west side?
A school has 50 students, with 20 students in the music club and 30 students in the art club. What is the probability that a randomly selected student is in both clubs?
A plane travels from city A to city B at an average speed of 450 km/h and returns at an average speed of 300 km/h. What is the average speed of the plane for the entire trip?
Tom owns 3 bicycles and his friend owns 5 bicycles. How many bicycles do they own in total?
A jar contains 12 blue marbles and 8 red marbles. If you randomly select one marble from the jar, what is the probability that it is blue?
A bakery is selling a dozen donuts for $8. If you want to buy 36 donuts, how much will you pay in total?
A picture is 6 inches wide and 8 inches tall. If it is enlarged by a factor of 2, what is the new width?
A car is traveling from city A to city B. The distance between the two cities is 240 miles. If the car has already traveled 120 miles, what fraction of the trip has it completed?
In a bag of marbles, the ratio of red to blue to green marbles is 5:7:9. What is the smallest ratio of green marbles to total marbles?
Anita has 250 pencils in a container. She gives 30 pencils to her sister and adds 15 more. How many pencils does Anita have now?
A bookshelf has 8 shelves, and each shelf can hold 5 books. If the bookshelf is currently empty, how many books can be placed on it in total?
The perimeter of a rectangle is 36 meters. If the length is 4 meters more than the width, what is the length of the rectangle?
A company has 150 employees, and 1/3 of them are managers. How many non-managerial employees work in the company?
If it takes 8 hours for 3 machines to complete a task, how many hours will it take for 4 machines to complete the same task?
What is the probability that a randomly drawn card from a standard deck of 52 cards is a king or a queen?
In a right triangle, the length of the hypotenuse is 15 units and one leg is 9 units. What is the length of the other leg?
If a bakery sells 240 loaves of bread per day and each loaf costs 2 dollars, how much money does the bakery make in a day?
A car travels 240 miles in 4 hours. How many miles does the car travel per hour?
A group of friends want to share some candy equally. If they have 48 pieces of candy and there are 8 friends, how many pieces of candy will each friend get?
A bicycle is on sale for 15% off its original price of $120. How much will you pay for the bicycle during the sale?
A cylinder has a diameter of 8 cm and a height of 12 cm. What is the volume of the cylinder?
A bookstore sells a total of 250 books per week. If they sell 120 fiction books and 60 non-fiction books, how many other types of books do they sell?
A water tank can hold 4800 liters of water. If 2400 liters of water are already in the tank, how much more water can be added?
A box contains 3 golden pens, 2 silver pens, and 1 black pen. What is the probability of randomly selecting a pen that is not golden?
In a quadrilateral, the lengths of two adjacent sides are 4 meters and 6 meters. What is the length of the diagonal that connects the ends of these sides?
Kevin has 12 kilograms of sugar. He uses 2 kilograms to make cookies. What percentage of the sugar is left?
A parallelogram has angles of 40 and 80 degrees. What is the measure of the other two angles?
A school has 500 students, and 20% of them are in grade 9, 30% are in grade 10, and 15% are in grade 11. How many students are in grades 9, 10, or 11?
Alex has 12 pencils in her pencil case. She lends 4 to her brother and buys 7 more. How many pencils does Alex have now?
A bookshelf has 8 shelves, and each shelf can hold 5 books. If the bookshelf is currently empty, how many books can be placed on it?
Ms. Thompson needs to buy 15 notebooks for her class. Each notebook costs 3 dollars. How much will Ms. Thompson spend on notebooks?
Ava has 24 crayons in her crayon box. She gives 2 to her sister and buys 4 more. What is the total number of crayons Ava has now?
A jar contains 18 marbles. If 7 marbles are removed, what fraction of the marbles are left?
A bakery has 250 loaves of bread and wants to package them in bags with 10 loaves each. How many bags can they make?
A bookshelf has 5 shelves, and each shelf can hold 8 books. If the bookshelf is currently empty, how many books can be placed on it in total?
A car travels 240 miles in 4 hours. How many miles does it travel per hour?
A company has $500 to spend on advertising. They want to spend 1/5 of the budget on Facebook ads and 1/4 on Google ads. How much will they spend on each type of ad?
A triangle has angles of 20 degrees, 50 degrees, and x degrees. What is the value of x?
A bookstore has 250 books on a shelf. If 30 books are removed and 50 books are added, how many books are on the shelf now?
A car travels from City A to City B at an average speed of 60 km/h, and returns at an average speed of 40 km/h. What is the average speed of the car for the entire trip?
A cylindrical tank has a diameter of 4 meters and a height of 6 meters. How much water can the tank hold?
A pizza parlor sells large pizzas with 16 slices and small pizzas with 8 slices. If they sold 15 large pizzas and 20 small pizzas, how many slices of pizza were sold?
A rectangular prism has a length of 6 cm, a width of 4 cm, and a height of 2 cm. What is the surface area of the prism?
A rectangular garden measures 10 meters by 5 meters. If a path that is 1 meter wide is built around the garden, what is the area of the path?
A bookshelf has 5 shelves and each shelf can hold 8 books. If the bookshelf is currently empty, how many books can be placed on it in total?
A car travels from City A to City B at an average speed of 70 km/h and returns at an average speed of 50 km/h. What is the average speed of the car for the entire trip?
A pizza parlor sells large pizzas for $15 each and small pizzas for $10 each. If they sell 12 large pizzas and 8 small pizzas in a night, how much money do they make in total?
A swimming pool is 25 meters long and 12 meters wide. If the water is 4 meters deep, what is the volume of water in the pool in cubic meters?
A bakery produces 350 loaves of bread daily. If they increase their production by 25%, what is the new daily production?
If 5x - 2 = 13, what is the value of x + 2?
A rectangular swimming pool measures 20 meters by 10 meters. If a deck that is 2 meters wide is built around the pool, what is the area of the deck?
Samantha has 30 books on her bookshelf. She lends 2 to her sister and buys 4 more. What percentage of her original number of books does she have now?
Alex used 24 crayons to color 4 pictures. How many crayons did Alex use to color each picture?
If a bakery can bake 240 cookies in 4 hours, how many cookies can it bake in 7 hours?
A box contains 12 balls. If we randomly select 3 balls from the box, what is the probability that exactly 2 balls are blue?
The sum of the angles of a triangle is 180 degrees. If one angle measures 70 degrees and another measures 40 degrees, what is the measure of the remaining angle?
The area of a circle is 16π square feet. What is the radius of the circle?
A cylindrical tank with a diameter of 4 feet has a height of 6 feet. What is the volume of the tank in cubic feet?
Tom has 1/2 of a tank of gas in his car. If he uses 1/4 of a tank of gas to drive to work, what fraction of a tank of gas is left?
If 3x + 2 = 5, what is the value of x?
A bakery sells 250 loaves of bread per day. If they make a profit of $0.50 per loaf, how much profit do they make in a day?
A group of 6 people - Jack, Kate, Lily, Mike, Nina, and Olivia - are going to the movies. If they are seated in a row, and Jack and Kate are seated next to each other, how many different seating arrangements are possible?
What is the surface area of a cylinder that is 5 cm in diameter and 10 cm in height?
A company has 250 computers in its office. If 15 computers are broken and they order 50 new computers, how many computers will they have in total?
Mark has 12 bags of potatoes in the storehouse. Each bag contains 8 potatoes. How many potatoes are there in total?
Samantha can paint 40 walls per day. How many walls can she paint in 8 days?
A group of 4 friends want to share some toys equally. If they have 64 toys and they want to put them in boxes of 8, how many boxes can they make?
Richard has 46 chairs in the restaurant originally. He ordered 12 more to be delivered at the end of the week. How many chairs will he have in the restaurant at the end of the week?
A water tank can hold 3000 liters of water. If 1200 liters of water are already in the tank, how much more water can be added?
A car is traveling at a speed of 60 miles per hour. If the car travels for 2.5 hours, how many miles will it travel?
A bag contains 5 red marbles, 3 blue marbles, and 2 green marbles. What is the probability of drawing a blue marble from the bag?
A rectangular prism has a length of 6 cm, a width of 4 cm, and a height of 2 cm. What is the volume of the prism?
A bookshelf has 5 shelves, and each shelf can hold 8 books. If the bookshelf is currently empty, how many books can be placed on it in total?
A bakery sells 300 loaves of bread per day. If they operate 5 days a week, how many loaves do they sell in a week?
A librarian has 8 shelves of books, with 12 books on each shelf. If she adds 4 more books to each shelf, how many books does she have in total?
A car dealership has 15 cars on the lot, with 5 tires on each car. If they want to replace 2 tires on each car, how many new tires are required?
A farmer has 18 baskets of oranges, with 9 oranges in each basket. How many oranges does he have in total if he adds 3 more oranges to each basket?
A group of friends want to share some candy equally. If they have 48 pieces of candy and there are 8 friends, how many pieces of candy does each friend get?
What is the value of y in the equation x + 2y = 9, when x is 3?
In a bag of 15 marbles, 7 are red, 4 are blue, and 3 are green. If 2 marbles are drawn at random, what is the probability that both are blue?
The area of a rectangle is 48 square meters. If the length is 8 meters, what is the width in meters?
The average of 7 test scores is 85. If 5 of the scores are 75, 80, 85, 90, and 95, what is the average of the remaining two scores?
In a set of 30 students, 20 speak Spanish, 15 speak German, and 10 speak both languages. What is the probability that a student speaks Spanish or German?
A rectangular prism has a length of 10 inches, a width of 5 inches, and a height of 3 inches. What is the volume of the prism?
If a car travels 270 miles in 6 hours, how many miles does it travel per hour?
A group of friends want to evenly share 48 cookies among themselves. If there are 8 friends, how many cookies will each friend get?
What is the probability that a randomly selected month is July or August?
Solve for y if 5y - 2 = 23?
A bakery produces 480 muffins in 8 hours. How many muffins does it produce per hour?
A computer has 9 identical usb ports. How many ways can 5 identical devices be connected?
What is the average of 1, 3, 5, 7 and 9?
Mark has 6 identical briefcases containing 5 identical folders. Each folder contains 4 identical documents. How many documents does Mark have in total?
Sarah has 21 balls of yarn to knit into scarves of 3 balls each. How many scarves can Sarah make?
A library has 500 books on its shelves. If 30% of the books are fiction, how many fiction books are there in the library?
A water tank can hold 1000 liters of water. If 300 liters of water are already in the tank, how much more water can be added?
A rectangular garden measures 15 meters by 8 meters. If a path that is 1 meter wide is built around the garden, what is the area of the path?
A company sells two types of products: A and B. The company sells 200 units of product A per day, and each unit costs $5. The company sells 150 units of product B per day, and each unit costs $3. How much money does the company make in a day?
A car travels from city A to city B at an average speed of 60 km/h. If the distance between the two cities is 240 km, how long does the trip take?
A department store is selling shirts and pants. If a shirt costs $15 and a pair of pants costs $25, how much would a customer pay for 3 shirts and 2 pairs of pants?
If it takes 5 hours to cycle 30 miles, how many miles can be cycled in 8 hours at the same rate?
A jar contains 18 red marbles, 12 blue marbles, and 10 green marbles. What is the probability that a randomly selected marble is blue?
Tom can finish a computer programming task in 8 hours, and Alex can finish it in 4 hours. If they work together, how long would it take them to finish the task?
A bakery sells a total of 250 loaves of bread per day. They sell a combination of whole wheat and white bread. If the ratio of whole wheat to white bread is 3:5, how many loaves of whole wheat bread do they sell per day?
Tom can type 30 words per minute. If it takes him 15 minutes to type a report, how many words are in the report?
In a certain school, the ratio of boys to girls is 5:3. If there are 120 students in the school, how many boys are there?
A rectangular prism has a length of 8 cm, a width of 6 cm, and a height of 4 cm. What is the volume of the prism?
A bakery sells a total of 250 loaves of bread per day. They sell a combination of whole wheat and white bread. If they sell 30 more loaves of whole wheat bread than white bread, and each loaf costs $2, how much money does the bakery make in a day?
A swimming pool is being filled at a rate of 2 cubic meters per hour. If the pool is 12 meters long, 8 meters wide, and 3 meters deep, how long will it take to fill the pool?
A bakery sells 240 loaves of bread per day. If they sell bread in packs of 4, how many packs of bread are sold daily?
If it takes 5 hours to walk 20 miles, how many hours will it take to walk 40 miles at the same rate?
In a bookshelf, there are 4 shelves, and each shelf can hold 8 books. If the bookshelf is currently empty, how many books can be placed on it in total?
What is the value of y in the equation: y - 2 = 7?
A group of friends want to share some candies equally. If they have 48 candies and there are 8 friends, how many candies will each friend get?
A bakery produces 250 loaves of bread per hour. They operate for 8 hours a day. If they need to produce a total of 4800 loaves of bread per week, how many days do they need to operate?
A cylindrical tank has a diameter of 4 meters and a height of 6 meters. How many cubic meters of water can it hold?
A car rental company has a fleet of 120 cars. 30% of the cars are currently rented out. If they receive 20 more cars, what percentage of the total cars will be rented out?
A rectangular prism has a length of 6 cm, a width of 4 cm, and a height of 2 cm. What is the surface area of the prism?
A company's stock price decreased by 15% from Monday to Tuesday. On Wednesday, it increased by 10%. What is the overall percentage change in the stock price from Monday to Wednesday?
A company sells 300 laptops in 10 days. How many laptops does it sell per day?
What is the value of y in the equation 5y - 2 = 11?
A university has 500 students. If 200 students are studying engineering, what is the probability that a randomly selected student is studying engineering?
A bus travels from city X to city Y at an average speed of 50 km/h and returns at an average speed of 30 km/h. What is the average speed of the bus for the entire trip?
A circle has a circumference of 20π cm. What is the diameter of the circle?
Tom can type 150 words in 10 minutes, Alex can type 240 words in 12 minutes and Sam can type 300 words in 20 minutes. If all three work together, how many words will they type in 24 minutes?
The area of a trapezoid is 48 and its height is 8. What is its base?
A bus is traveling from city C to city D. The distance between the cities is 480 km. If the bus travels at a speed of 80 km/h, how long will it take to reach city D?
If cos(x) = 2/3, what is tan(x)?
It takes Rachel 2 hours to walk 12 km. If she walks at the same rate, how long will it take her to walk 21 km?
If 10 workers can build 10 houses in 10 days, how many days will it take 5 workers to build 5 houses?
There are 10 marbles in a bag: 4 white, 2 black, and 4 red. What is the probability that a randomly selected marble is not white?
A train travels at 60 miles per hour, how many yards does it travel in 2 hours?
If 2x + 3y = 11 and x + 3y = 7, what is the value of x?
A bookshelf has 5 shelves, and each shelf can hold 8 books. If the bookshelf is currently empty, how many books can be placed on it in total?
Emma has 18 pencils in her pencil case. If she adds 7 more, how many pencils will she have in total?
Mr. Jackson has 24 cakes to be served at a party. If he wants to serve them in rows of 4, how many rows can he make?
Olivia is making a square painting with a side length of 11 inches. What is the perimeter of the painting?
In a group of 60 students, there are 36 girls and 24 boys. What percentage of the students are boys?
Leo has 45 books on his shelf, and he wants to add 9 more books. If he can fit 12 books on each shelf, how many shelves will he need in total?
What is the average of the test scores of Tom, Alex, and Roger, if Tom scored 85, Alex scored 92, and Roger scored 88 on the test?
A bakery is having a sale of 20 percent off all cakes. If a cake originally costs $50, how much will you pay for the cake after the discount?
The length of a rectangle is 7 cm more than its width. If the perimeter of the rectangle is 40 cm, what is the length of the rectangle?
A water tank can hold 1200 liters of water. If 480 liters of water are already in the tank, how much more water can be filled in the tank?
A book costs $18. If a 10 percent sales tax is added, how much will you pay for the book including tax?
A box company has 8 cartons with 25 boxes in each. How many boxes does the box company have in total?
If a bat and a ball together cost $110, and the bat costs $100 more than the ball, how much does the ball cost?
A bakery sells 300 loaves of bread per day. If they sell each loaf for $2, how much money does the bakery make in a day?
In a right-angled triangle, the length of the hypotenuse is 5 inches and one of the other sides is 3 inches. What is the length of the third side?
A person traveled from city A to city B at an average speed of 50 km/h and returned at an average speed of 30 km/h. What is the average speed of the person for the entire trip?
A bookshelf has 12 shelves, with 9 books on each shelf. If 24 books are added, how many books will the bookshelf have in total?
A bakery wants to pack 18 cookies in each box. If they have 72 cookies in total, how many boxes can they fill?
A toy box has 18 toys in it. If 4 toys are taken out, and then 2 more toys are added, how many toys are in the toy box now?
A group of friends want to share some money equally. If they have $120 and there are 10 friends, how much money will each friend get?
A rectangle has a length of 12 cm and a width of 8 cm. What is the area of the rectangle?
A bookstore has 15 shelves, and each shelf can hold 8 boxes of books. If the store currently has 96 boxes of books, how many shelves will be filled?
Sarah can paint a room in 4 hours, and her brother can paint the same room in 6 hours. If they work together, how many hours will it take them to paint the room?
A car travels 180 miles in 3 hours. How many miles does it travel per hour?
A rectangular garden measures 12 meters by 8 meters. If a path that is 2 meters wide is built around the garden, what is the area of the path?
A group of friends want to share some candy equally. If they have 48 pieces of candy and there are 8 friends, how many pieces of candy will each friend get?
A bookstore sells 350 books per week. If each book costs $15, how much money does the bookstore make in a week?
A pizza parlor sells large pizzas with 16 slices each. If a customer buys 3 large pizzas with 12 slices eaten, what fraction of the total slices were eaten?
In a rectangle, the length is 8 cm and the width is 6 cm. If the length increases by 2 cm, what is the new perimeter of the rectangle?
A survey of 50 people shows that 30 people love a new movie. What is the probability that a randomly selected person in the survey also loves the movie?
A car travels from City A to City B at a speed of 60 km per hour. If the distance between the two cities is 480 km, how many hours does it take the car to travel from City A to City B?
A bookstore is having a sale for 20% off on books. If the original price of a book was $180, what is the sale price?
A parking lot has 30 cars parked in it. If 5 more cars are parked, what is the total number of cars in the parking lot?
A triangle has two sides measuring 5 cm and 12 cm. What is the length of the third side if it is a right triangle and the third side is the hypotenuse?
A juice carton can hold 2 liters of juice. If 0.5 liters of juice are already in the carton, how much more juice can be added?
A shirt is on sale for $45. If a 10% discount is applied, what is the sale price?
What is the perimeter of a square with a side length of 8 cm ?
The graph below shows the relationship between the number of hours studied and the score on a math test. What is the slope of the line ?
In a group of 15 students, 7 students like math, 5 like science, and 2 like both. How many students like neither ?
A fair coin is flipped 4 times. What is the probability that the coin lands on heads exactly 3 times ?
A bakery has 300 apple pies, 250 cherry pies, and 200 lemon pies. If 25% of the apple pies, 20% of the cherry pies, and 15% of the lemon pies are sold, how many pies are left ?
A box contains 7 blue pens, 9 black pens, and 2 red pens. What is the probability of randomly selecting a black pen?
A certain rectangle has a length 8 cm and a width 5 cm. What is the perimeter of the rectangle?
Antonio has 12 more books than his 8 video games. If Antonio gives 3 books to his sister, what is the difference between the number of books and video games Antonio has now?
A bakery sells 240 loaves of bread per day. If they pack 8 loaves of bread per bag, how many bags do they need per day?
A cylindrical jar has a radius of 4 cm and a height of 10 cm. What is the volume of the jar in cubic centimeters?
A bakery sells a total of 250 loaves of bread per day. They sell a combination of whole wheat and white bread. If they sell 30 more loaves of whole wheat than white bread, and each loaf of whole wheat costs $2.50, how much money do they make from selling whole wheat bread per day?
A group of friends want to share some candy equally. If they have 48 pieces of candy and there are 8 friends, how many pieces of candy will each friend get?
A car travels from City A to City B at an average speed of 60 miles per hour. On the return trip, the car travels at an average speed of 40 miles per hour. What is the average speed for the entire trip?
A bookshelf has 5 shelves, and each shelf can hold 8 books. If the bookshelf is currently empty, how many books can be placed on it in total?
A water tank can hold 1200 liters of water. If 300 liters of water are already in the tank, how much more water can be added?
What is the value of x if 3x - 2 = 11?
What is the probability that a 5-sided die lands on an odd number if it is rolled 4 times?
If 2x + 3y = 12 and 3x - 2y = 7, what is the value of x?
What is the perimeter of a triangle with sides that measure 5 cm, 6 cm, and 7 cm?
A water tank can hold 1200 liters of water. If 3/5 of the tank is already filled, how many more liters of water can be added to the tank?
What is the perimeter of a rectangle whose length is 7 cm and width is 3 cm?
A water tank can hold 1200 liters of water. If 300 liters of water are already filled, how much more water can be filled?
What is the value of y if 5y - 3 = 22?
A bakery sells 250 loaves of bread per day. If each loaf costs $2, how much money does the bakery make in a day?
What is the area of a circle whose radius is 5 inches?
A bookshelf has 5 shelves, and each shelf can hold 8 books. If the bookshelf is currently empty, how many books can be placed on it in total?
A restaurant serves 240 customers in a day, and each customer orders an average of 2.5 drinks. How many drinks does the restaurant serve in a day?
Marcus has $54 in his wallet, and he wants to buy a new phone that costs $249. How much more money does Marcus need to buy the phone?
A rectangular garden measures 15 meters by 8 meters. If a path that is 2 meters wide is built around the garden, what is the area of the path?
A factory produces 500 toys in a day, and each toy requires 3 batteries. How many batteries are needed to produce the toys in a day?
A bakery can produce 120 cupcakes in 3 hours. How many cupcakes can the bakery produce in 5 hours?
A group of friends want to share some candy equally. If they have 48 pieces of candy and there are 8 friends, how many pieces of candy will each friend get?
If a car is traveling at an average speed of 70 kilometers per hour, how far will it travel in 2.5 hours?
A rectangular swimming pool is 15 meters long and 8 meters wide. If a path that is 2 meters wide is built around the pool, what is the area of the path?
A building is 120 meters tall. If a weather vane that is 6 meters tall is placed on top of the building, what is the total height of the building with the weather vane?
A company has 240 employees, and 15% of them are managers. How many managers does the company have?
A car travels 240 miles in 8 hours. How many miles does it travel per hour?
A rectangular garden has a perimeter of 120 meters. If the length is 30 meters, what is the width?
A bakery sells 250 loaves of bread per day. If they make a profit of $0.50 per loaf, how much profit do they make in a day?
A water tank can hold 1200 liters of water. If 300 liters of water are already in the tank, how much more water can be added?
A restaurant receives a total of 320 phone calls in a day, including 120 calls for delivery. If the restaurant gets 30 more calls for pickup than dine-in, and each delivery call takes an average of 2 minutes to respond to, how many minutes are spent responding to delivery calls?
A clothing store has 18 racks, and each rack contains 10 shelves. If each shelf holds 6 clothing items, how many clothing items are there in the store?
A team of 8 developers, with an average salary of $60,000, are working on a project. If the project hires 2 more developers with an average salary of $80,000, what will be the new average salary of the team?
A bike and a helmet together cost $120. The bike costs $90 more than the helmet. How much does the helmet cost?
Tom has 48 boxes of pens in the warehouse initially. He ordered 36 more boxes to be shipped at the end of the day. How many boxes of pens will he have in the warehouse at the end of the day?
A car travels from City A to City B at an average speed of 60 km/h and returns to City A at an average speed of 80 km/h. What is the average speed of the car for the entire trip?
A library has a total of 500 books on its shelves. The ratio of fiction to non-fiction books is 3:2. How many fiction books are in the library?
In a class of 15 students, 8 can play the guitar, 5 can play the piano, and 2 can play both instruments. How many students cannot play either instrument?
A store sells a total of 400 units of two types of products, A and B. The profit margin on product A is 20% and on product B is 30%. If the total profit is $96, what is the number of units of product A sold?
A water tank can hold 1000 liters of water. If 300 liters of water are already in the tank, how much more water can be added to the tank?
A length of a rectangle is 5 cm longer than its width. If the perimeter is 34 cm, what is the width of the rectangle?
A bakery has a special promotion where customers receive a free cake with every purchase of 3 cakes. If a customer buys 9 cakes, how many cakes will they receive in total?
The average of 5 numbers is 20. If the average of the first 3 numbers is 25, what is the average of the remaining 2 numbers?
A cylindrical tank has a height of 10 meters and a radius of 2 meters. What is the volume of the tank in cubic meters?
A group of friends want to share some money equally. If they have $240 among them and there are 8 friends, how much will each friend get if they decide to keep $20 for themselves?
What is the value of y if 3y - 2 = 14?
A bookstore has 8 shelves, and each shelf can hold 12 books. If the store is currently empty, how many books can be placed on the shelves in total?
A car travels 120 miles in 3 hours. How many miles will it travel in 6 hours?
A laptop is on sale for 20% off its original price of $1,200. How much will the laptop cost during the sale?
In a group of 75 people, 45 like reading, 30 like writing, and 20 like both activities. What is the probability that a person likes at least one activity?
A bookshelf has 12 shelves, and each shelf can hold 8 books. If the bookshelf is currently empty, how many books can be placed on it in total?
If a baker makes 240 loaves of bread per day, and he works 5 days a week, how many loaves of bread does he make in a week?
If 5 people can paint a house in 6 hours, how many hours will it take for 3 people to paint the same house?
A basketball team scored 75 points in a game. If they scored 15 points in the first quarter, and 25 points in the third quarter, how many points did they score in the other two quarters combined?
If a car travels from city A to city B at an average speed of 80 km/h, and it travels back at an average speed of 60 km/h, what is the average speed for the whole trip?
Mrs. Thompson has 12 pounds of sugar to bake cookies. If she needs 0.25 pounds of sugar for each batch of cookies, how many batches of cookies can she bake?
Eric has 8 boxes of toys to share with his friends. If he wants to put 4 toys in each box, how many toys will Eric need in total?
Ryan and his sister, Rachel, can build a sandbox together in 5 hours. If Rachel can build it alone in 10 hours, how many hours will it take for Ryan to build it alone?
A bookshelf has 5 shelves, and each shelf can hold 8 books. If the bookshelf is currently empty, how many books can be placed on it in total?
Olivia wants to fill containers of 2 liters each with juice. If she has 18 liters of juice, how many containers can she fill?
A snail is at the bottom of a 20-foot well. Each day, it climbs up 3 feet, but at night, it slips back 2 feet. How many days will it take for the snail to reach the top of the well?
A bakery sells 250 loaves of bread at $2 each and 150 pastries at $3 each. What is the total amount of money earned by the bakery?
In a certain triangle, the ratio of the length of its sides is 3:4:5. If the shortest side is 12cm long, what is the length of the longest side?
A car travels from city A to city B at an average speed of 60 miles per hour. On the return trip, the car travels at an average speed of 40 miles per hour. What is the average speed of the car for the entire trip?
A rectangular tank is filled at a rate of 2 cubic meters per minute. If the tank has a capacity of 100 cubic meters, how many minutes will it take to fill the tank completely?
A bookshelf holds 12 shelves of books. If each shelf holds 8 rows of books and each row holds 15 books, how many books are on the bookshelf?
A cyclist rides 15 kilometers in 3 hours. What is the average speed of the cyclist?
A machine produces 240 bottles of soda per hour. If it operates for 8 hours, how many bottles of soda does it produce?
A farmer plants 120 seeds of corn in a field. If 90 seeds germinate, what is the probability that a seed will germinate?
A person spends $120 on 8 shirts. What is the cost of each shirt?
A rectangular garden has a length that is 10 meters more than its width. If the perimeter of the garden is 60 meters, what is the width of the garden?
A company produces 2400 units of a certain product daily. If the daily production is increased by 20%, how many units are produced daily now?
A circular swimming pool has a diameter of 10 meters. What is the length of the rope that surrounds the pool if the rope is 2 meters away from the pool's edge?
A water tank can hold 3000 liters of water. If 1800 liters of water are already in the tank, how many more liters can be filled?
A cyclist travels from City A to City B at an average speed of 20 km/h and returns at an average speed of 30 km/h. What is the average speed of the cyclist for the entire trip?
Tom can mow the lawn in 5 hours, while his brother can do it in 7 hours. If they work together, how long will it take for them to mow the lawn?
A bicycle travels from Town A to Town B at an average speed of 20 km/h and returns at an average speed of 30 km/h. What is the average speed of the bicycle for the round trip?
In a poll, 40% of voters said they preferred candidate A over candidate B. If 300 voters were surveyed, how many prefer candidate A?
Sophia has 50 pencils. She wants to share them equally among 8 of her classmates. How many pencils will each classmate get?
What is the median of the dataset 1, 3, 5, 7, 9, 11?
A cyclist rides from town A to town B at an average speed of 30 km/h and returns at an average speed of 45 km/h. What is the average speed of the cyclist for the entire trip?
A rectangular garden has a length that is 5 meters more than its width. If the perimeter is 36 meters, what is the length of the garden?
A bookstore sells 300 books in the morning and 450 books in the afternoon. What is the total number of books sold by the bookstore in a day?
A triangle has angles of 30°, 75°, and x. What is the value of x?
A swimming pool is filled by two pipes A and B. Pipe A can fill the pool in 6 hours, and pipe B can fill the pool in 4 hours. How long will it take for both pipes A and B to fill the pool together?
A group of friends want to share {} boxes of chocolates. If they divide the chocolates equally, how many chocolates will each person get if there are {} chocolates in each box and they are {} friends?
A rectangular swimming pool has a length of {} meters and a width of {} meters. If a path that is {} meters wide is built around the pool, what is the area of the path?
What is the slope of the line that passes through the points ({}, {}) and ({}, {})?
A bakery sells {} cups of flour in a day. If they use {} cups of flour to make one cake, how many cakes can they make in a day?
The height of a triangle is {} and its base is {}. What is the length of the hypotenuse of the triangle?
If a company produces 420 widgets in 7 days, how many widgets does it produce per day?
In a quadrilateral, the length of one diagonal is 12 cm and the other diagonal is 8 cm. What is the area of the quadrilateral?
A rectangular prism has a length of 8 cm, a width of 6 cm, and a height of 4 cm. What is the surface area of the prism?
If a worker earns $240 in a 4-day workweek, how much does the worker earn per day?
A bookshelf has 5 shelves, and each shelf can hold 8 books. If the bookshelf is currently empty, how many books can be placed on it in total?
A cyclist rides 30 kilometers in 2 hours. If she continues at this rate, how many kilometers will she ride in 7 hours?
A rectangular swimming pool has a length of 15 meters and a width of 8 meters. If the water in the pool is 2 meters deep, what is the volume of the water in cubic meters?
A factory produces 350 toys in 5 hours. If the factory operates for 12 hours, how many toys will it produce in total?
A company has 250 employees, and 1/5 of them are management staff. How many management staff does the company have?
A snail moves at a rate of 0.25 meters per minute. How many meters will it move in 2 hours?
A toy car travels around a circular track of 12 meters at a speed of 4 meters per second. How many seconds will it take for the toy car to complete one round?
A bakery sells 120 loaves of bread per day. If each loaf costs 2 dollars, how much money does the bakery make in a day?
In a right triangle, one angle measures 30 degrees. What is the measure of the other acute angle?
A rectangular tank has a length of 8 meters, a width of 6 meters, and a height of 2 meters. How many cubic meters of water can it hold?
A shirt is on sale for 20 percent off its original price of 150. How much will you pay for the shirt?
A book costs $45. A 20% discount is applied to the book. How much will the book cost after the discount?
Tom has 12 stickers and wants to buy more stickers that cost 40 cents each. If he wants to buy 25 stickers, how much money does he need?
In a set of 50 students, 25 are wearing glasses, 20 are wearing hats, and 10 are wearing both glasses and hats. How many students are wearing glasses or hats?
The perimeter of a rectangle is 32 meters. If the length of the rectangle is 10 meters, what is the width of the rectangle?
A plane travels from airport A to airport B at an average speed of 250 km/h and returns at an average speed of 200 km/h. What is the average speed of the plane for the entire trip?
A rectangle has a length of 8 meters and a width of 5 meters. What is the area of the rectangle?
A car travels from City A to City B at a speed of 60 km/h and returns at a speed of 40 km/h. What is the average speed of the car for the entire trip?
In the equation x^2 + 4x - 8 = 0, what is the value of x?
A jar contains 12 marbles, 8 of which are red. What is the probability of randomly selecting a red marble?
A bicycle is on sale for 20% off its original price of $120. What is the sale price of the bicycle?
A bookshelf has 15 shelves, and each shelf can hold 8 books. If the bookshelf is currently empty, how many books can be placed on it?
A bakery sells 240 muffins per day. They sell a combination of blueberry and banana muffins. If they sell 20 more blueberry muffins than banana muffins, and they sell 120 blueberry muffins, how many banana muffins do they sell?
A cyclist travels 25 kilometers in 5 hours. How many kilometers does the cyclist travel per hour?
A rectangular prism has a length of 6 cm, a width of 4 cm, and a height of x cm. If the volume of the prism is 48 cubic cm, what is the value of x?
A group of students want to share some money equally. If they have 72 dollars and there are 9 students, how many dollars will each student get?
What is the length of the hypotenuse of a right triangle whose shorter leg is 2 meters and longer leg is 5 meters?
A triangle has two sides measuring 3 inches and 8 inches. What is the perimeter of the triangle?
A garden is in the shape of a right triangle. The length of the hypotenuse is 15 yards and one of the legs is 9 yards. What is the length of the other leg?
David has 20 bags of apples. He needs to put 11 apples in each bag to sell at a store. How many apples does David need?
A survey says that 75% of the people surveyed agree that a new policy is effective. What is the probability that a randomly selected person in the survey also agrees that the new policy is effective?
A bookshelf has 12 shelves, and each shelf can hold 8 books. If the bookshelf is currently empty, how many books can be placed on it in total?
A car travels from City A to City B at an average speed of 60 miles per hour. If the distance between the two cities is 240 miles, how long does the trip take?
In a bag of marbles, the ratio of red to blue marbles is 2:3. If there are 20 red marbles, how many blue marbles are there?
What is the value of y in the equation: y - 2 = 7?
A fruit stand sells 15 crates of apples at $15 each. What is the total amount of money the fruit stand earns?
In a certain gym, there are 15 treadmills and 20 exercise bikes. If 5 treadmills and 3 exercise bikes are out of order, what percentage of the total machines in the gym are not functioning?
A rectangular swimming pool has a length of 20 meters, a width of 8 meters, and an average depth of 3 meters. If the pool is filled with water at a rate of 2 cubic meters per minute, how many minutes will it take to fill the entire pool?
A group of 6 friends want to share some candy equally. If they have 48 pieces of candy, how many pieces will each friend get?
A company is offering a 15% discount on all purchases above $100. If a customer buys an item that costs $150, how much will he need to pay after the discount?
A train travels at an average speed of 60 km/h for the first 2 hours of its journey, and at an average speed of 40 km/h for the next 3 hours. What is the average speed of the train for the entire journey?
If a 10-kg watermelon is divided into packages of 0.5 kg each, how many packages can be made?
A bakery has 340 cookies to be packed into boxes of 8 cookies each. How many boxes can be filled?
A rectangular swimming pool has a length of 20 meters, a width of 10 meters, and an average depth of 2 meters. What is the volume of water needed to fill the pool?
A supermarket sells 210 kilograms of coffee per week. If they want to package it into bags of 5 kilograms each, how many bags can they make?
A bookshelf has 5 shelves, and each shelf can hold 8 books. If the bookshelf is currently empty, how many books can be placed on it in total?
A bicycle is on sale for 15% off its original price. The sale price is $85. What was the original price of the bicycle?
In a bookshelf, there are 8 shelves and each shelf can hold 5 books. If the bookshelf is currently empty, how many books can be placed on it in total?
What is the value of y in the equation 3y - 2 = 7?
The perimeter of a square is 32 meters. What is the length of one side of the square?
A basket contains 12 apples and 8 oranges. How many ways can 3 fruits be selected from the basket?
A circular dartboard has 10 equally spaced sections. What is the probability that the third section is selected if the dart is thrown 4 times?
What is the mean of the dataset 11, 13, 15, 17, 19?
A bookstore sells a total of 180 books per day. They sell a combination of hardcover and paperback books. If they sell 20 more hardcover books than paperback books, and they sell 100 hardcover books, how many paperback books do they sell?
A triangular garden has a base of 8 meters and a height of 6 meters. What is the area of the garden?
A cylindrical tank has a radius of 3 meters and a height of 4 meters. What is the volume of the tank?
What is the probability that a randomly drawn ball from a basket of 15 balls is not blue?
A bookshelf has 5 shelves, and each shelf can hold 8 books. If the bookshelf is currently empty, how many books can be placed on it in total?
A pizza parlor sells large pizzas that are cut into 16 slices. If a customer buys 2/4 of a pizza, how many slices will they get?
A bakery sells 240 loaves of bread per day. If they make a profit of $0.50 per loaf, how much profit do they make in a day?
A rectangular garden measures 15 meters by 8 meters. If a path that is 2 meters wide is built around the garden, what is the area of the path?
If eight identical machines can perform 240 units of work in 4 hours, how many units of work can one machine perform in 1 hour?
A bookshelf contains 210 books. If the bookshelf has 7 shelves, each containing an equal number of books, how many books are on each shelf?
Tom has 18 pencils in his pencil case. If he wants to put them into boxes of 3 pencils each, how many boxes can Tom make?
A factory produces 2100 units of a product in 5 days. How many units of the product can the factory produce in 1 day?
Olivia has 24 stickers on a sheet. If she wants to put them into 4 equal groups, how many stickers will each group have?
Alex is planning a trip from City X to City Y. If the distance between City X and City Y is 480 miles and he drives at a constant speed of 60 miles per hour, how many hours will he take to cover the distance?
Olivia has a collection of 15 identical bookmarks. If she adds 8 more identical bookmarks to her collection, what is the probability that a randomly selected bookmark from her collection is one of the new bookmarks?
Rachel can bake a cake in 2.5 hours and her sister Emily can bake the same cake in 3.5 hours. If both Rachel and Emily work together, how many hours will it take them to bake the cake?
Lucas can ride his skateboard 36 miles in 3 hours. How many miles can he ride it in 7 hours?
In a right triangle, the length of the hypotenuse is 7 and one of the legs is 4. What is the length of the other leg?
Mrs. Thompson has 12 boxes of crayons. Each box contains 8 crayons. How many crayons does Mrs. Thompson have in total?
A store sells 300 laptops per month. If each laptop costs $1,200, how much does the store earn per month?
What is the probability that a coin flip lands on heads three times in a row?
What is the probability that the sum of the numbers on three 6-sided dice is 10?
What is the volume of a cylinder with a height of 5 inches and a base radius of 4 inches?
Sarah has 5 bags of candies. Each bag has 8 candies. How many candies does Sarah have in total?
What is the probability of rolling an even number on a fair six-sided die in three consecutive rolls?
If 2x + 5 = 11, what is the value of 2x - 5?
In a regular pentagon, all 5 vertices are labeled. What is the number of ways to choose 2 vertices such that they do not form a diagonal?
Rachel has 42 jerseys in the store originally. She sold 18 of them to customers. How many jerseys will Rachel have in the store at the end of the day?
If 3x - 5y = 11 and 2x + 3y = 7, what is the value of x?
A bookshelf has 5 shelves, and each shelf can hold 8 books. If the bookshelf is currently empty, how many books can be placed on it in total?
A bicycle travels from Town A to Town B. If it travels 180 kilometers in 6 hours, how many kilometers will it travel in 9 hours?
A box of chocolates weighs 1.5 kilograms. If Sara buys 12 boxes of chocolates, what is the total weight of the chocolates?
A coffee shop sells 180 cups of coffee at $1.50 each and 70 cups of tea at $2.25 each. How much money did the coffee shop make in total?
John bought a shirt for $35 and a pair of jeans for $40. How much did John spend in total?
A company produces 350 phones per day. How many phones will they produce in 6 days?
If it takes 3 hours to walk 12 miles, how many miles can be walked in 5 hours?
What is the value of y in the equation: 4y - 2 = 16?
A deck of cards contains 30 red cards, 20 black cards, and 10 blue cards. What is the probability that a randomly selected card is blue?
Alex has 24 boxes of crayons. Each box contains 6 crayons. If he gives away 12 crayons, how many crayons does Alex have remaining?
Samantha has 16 jars of jam. She uses 3 jars for her first recipe, 4 jars for her second recipe, and 1 jar for her third recipe. How much jam does Samantha have left?
If a book costs $18 and there is a 20% discount, how much will the book cost after the discount?
Ben can fix a bike in 8 hours, and his sister can fix the same bike in 6 hours. If they work together, how long will it take them to fix the bike?
In a set of 60 students, 40 speak Spanish, 30 speak French, and 20 speak both languages. What is the probability that a student speaks at least one language?
The length of a rectangle is 8 cm and its width is 5 cm. What is the perimeter of the rectangle?
A bottle of juice contains 1.5 liters of juice. If 0.5 liters of juice are consumed, what percentage of juice is left?
A bakery is making a special batch of cookies for a holiday sale. They need to package 480 cookies into boxes that hold 12 cookies each. How many boxes will they need?
A car travels from town A to town B at an average speed of 75 km/h. If the distance between the two towns is 240 km, how long did the trip take?
A student scored 72, 85, and 90 on her first three exams in a class. What score must she achieve on the fourth exam to have an average score of 85 for all four exams?
A rectangular swimming pool has a length of 20 meters and a width of 8 meters. How many meters is its perimeter?
A collection of books has 8 fiction books, 10 non-fiction books, and 2 biographies. What is the total number of books in the collection?
A car traveled 300 kilometers in 6 hours. What is the average speed of the car per hour?
In a class of 40 students, 30 students passed the exam. What is the percentage of students who failed the exam?
What is the value of y if y - 2 = 7?
A library has 360 books on a shelf. If they want to put them into boxes of 12 books each, how many boxes can they make?
A bakery sells a total of 420 loaves of bread per week. If they sell 60 loaves on Monday, 80 loaves on Tuesday, and 70 loaves on Wednesday, how many loaves do they sell on the remaining days of the week?
The area of a triangle is 36 square meters. If the base of the triangle is 6 meters, what is the height of the triangle?
A car travels from city A to city B at an average speed of 60 kilometers per hour. If the distance between the cities is 300 kilometers, how many hours does the trip take?
A bookshelf has 5 shelves, and each shelf can hold 8 books. If the bookshelf is currently empty, how many books can be placed on it in total?
Sarah is making gift bags for a birthday party. She needs to put 7 candies in each bag and has 49 candies. How many gift bags can Sarah make?
A rectangular garden measures 10 meters by 5 meters. If a path that is 1 meter wide is built around the garden, what is the area of the path?
In a certain city, the ratio of cars to buses is 10:3. If there are 300 cars, how many buses are there?
Emily is saving money for a new bike that costs $120. She already has $40 and can save $10 per week. How many weeks will it take Emily to save enough money to buy the bike?
A cylindrical water tank has a height of 10 meters and a radius of 4 meters. What is the volume of water that the tank can hold?
Alex has 20 boxes of pens in the store originally. He received 15 more boxes to be stocked on the shelf. How many boxes of pens will he have in the store after restocking?
A computer store is having a sale. They offer a 20% discount on all laptops above 800 dollars. If John places an order of 950 dollars, how much will he pay after the discount?
A rectangle has {} sides with a fixed length and two sides with a variable length. How many possible combinations of sides are possible?
In a deck of 52 playing cards, 13 are spades, 13 are hearts, and the rest are diamonds or clubs. What is the probability of randomly selecting a heart or diamond card?
A bus travels from City X to City Y at an average speed of 75 km/h and returns at an average speed of 50 km/h. What is the average speed of the bus for the entire trip?
A bakery produces 240 loaves of bread per day. If they operate 7 days a week, how many loaves of bread do they produce in a week?
A tennis court is 78 feet long. If a tennis player hits the ball 3 feet beyond the baseline, how many feet is the ball from the opposite baseline?
A water tank can hold 1200 liters of water. If 300 liters of water are already in the tank, how much more water can be added?
A student scored 72, 85, and 91 on three math tests. What is the student's average score?
A delivery truck travels from Warehouse A to Warehouse B at an average speed of 50 km/h and returns at an average speed of 30 km/h. What is the average speed of the truck for the entire trip?
A factory produces 1500 units of a product daily. What is the total number of units produced in 5 days?
The volume of a cube is 125 cubic inches. What is the length of the cube's edge?
What is the probability that a randomly selected coin in a jar of 50 coins is a quarter, if 10 of them are quarters?
What is the perimeter of a triangle with sides of 7, 10, and 12 inches?
What is the mode of the dataset 11, 15, 18, 18, 21, 22?
In a bakery, 8 people can bake 48 cakes in 6 hours. How many hours will it take for 4 people to bake 32 cakes?
What is the value of y in the equation 3y - 4 = 17?
A rectangular garden is surrounded by a walkway of 2 meters. If the garden itself is 10 meters by 5 meters, what is the area of the walkway?
The length of a rectangle is 2x - 3 meters and the width is x + 2 meters. What is the area of the rectangle?
If 3 people can eat 12 pizzas in 2 hours, how many pizzas can 6 people eat in 3 hours?
For David it takes 8 hours to clean the room. If it takes Emily 6 hours to clean the same room, how many hours will it take for David and Emily together to clean the room?
In how many ways can 7 different toys be arranged in a row?
Sophia has 3 boxes of oranges. Each box contains 12 bags and each bag contains 4 oranges. How many oranges does Sophia have in total?
Olivia has 15 folders of papers each containing 9 packets of papers. If each packet has 16 papers, how many papers does Olivia have in total?
The perimeter of a rectangle is 32 and its length is 8. What is its width?
A car travels 250 miles in 5 hours. How many miles does it travel per hour?
A student has 12 pencils and gives 2 to his friend. What percentage of the pencils does he have left?
A rectangular garden measures 8 meters by 5 meters. If a path that is 1 meter wide is built around the garden, what is the area of the path?
A factory produces 1200 toys per day. If the factory operates for 8 hours a day, how many toys does it produce per hour?
A tank can hold 800 liters of water. If 480 liters of water is already in the tank, how much more water can it hold?
A printing company produces {} sheets of paper per hour. If the company operates 5 machines, and each machine runs for 8 hours, how many sheets of paper are produced in total?
A group of friends want to share {} pizzas evenly. If there are 12 friends, and each pizza is cut into 16 slices, how many slices will each friend get?
In a box of 20 pens, 5 are red, 3 are blue, and the rest are black. What is the probability of randomly selecting a black pen?
A cyclist travels from Town A to Town B at an average speed of 25 km/h and returns at an average speed of 30 km/h. What is the average speed for the entire trip?
Rebecca is designing a triangular roof with a base of 8 meters and a height of 6 meters. If she wants to install a 0.5-meter wide border around the roof, what is the area of the border?
Ahmed has 32 boxes of pencils. Each box contains 8 pencils. How many pencils does Ahmed have in total?
A bookstore has a collection of 150 fiction books and 100 non-fiction books. What fraction of the books are fiction novels?
A car travels 320 kilometers in 4 hours. How far will it travel in 5 hours at the same speed?
From a batch of 100 light bulbs, a factory finds that 8 are defective. What percentage of the light bulbs are defective?
Mr. James bought a house for 220,000 dollars. He pays 10 percent of the original price as down payment. How much money does Mr. James pay as down payment?
A water tank can hold 1200 liters of water. If 300 liters of water are already in the tank, how many more liters of water can be added?
A group of students want to share some candies equally. If they have 240 candies and there are 10 students, how many candies will each student get?
A company produces 500 bottles of juice per hour. If the company operates for 8 hours a day, how many bottles of juice are produced in a day?
A person has 8 boxes, each with 6 packets of chocolates. If 2 more packets are added to each box, what is the total number of packets of chocolates?
A cyclist travels from town A to town B at an average speed of 30 km/h and returns at an average speed of 20 km/h. What is the average speed of the cyclist for the entire trip?
A bakery sells a total of 480 pastries per day. If 120 of them are donuts, what percentage of the total pastries sold are donuts?
Tom can paint a room in 4 hours and his brother can paint the same room in 6 hours. If they work together, how many hours will it take them to paint the room?
A bookshelf has 12 shelves, and each shelf can hold 8 books. If the bookshelf is currently empty, how many books can be placed on it in total?
A student scored 72, 81, and 90 on three math tests. What is the student's average score on the three tests?
A restaurant has 15 tables, and each table can seat 4 people. If the restaurant is currently full, how many people are in the restaurant?
A bookstore sells 120 books per day. How many books does it sell in 7 days?
A basketball team wins 80% of their games. If they play 25 games, how many games do they win?
A rectangular garden measures 15 meters by 20 meters. If a path that is 2 meters wide is built around the garden, what is the area of the path?
A water tank can hold 4800 liters of water. If 3200 liters of water are already in the tank, how much more water can be added?
A bakery sells a total of 320 pastries per day. They sell a combination of muffins and cakes. If they sell 40 more muffins than cakes, and they sell 180 muffins, how many cakes do they sell?
What is the probability that a student who is selected at random from a class of 20 students is a boy, given that the class contains 12 boys?
A bakery sells 240 cookies in a day. If they sell small boxes of 12 cookies each and large boxes of 24 cookies each, how many boxes of each type did they sell?
A bicycle costs $120. If the sales tax rate is 8%, how much will the bicycle cost including tax?
There are 18 students in a class and 12 of them are girls. In how many ways can the girls be seated in a row of 12 chairs?
A cube has a volume of 27 cubic meters. What is the length of one side of the cube?
A bookshelf has 5 shelves, and each shelf can hold 8 books. If the bookshelf is currently empty, how many books can be placed in it?
A group of friends want to split some money equally. If they have $120 and there are 8 friends, how much money will each friend get?
A water tank can hold 4800 liters of water. If 1200 liters of water are already in the tank, what percentage of the tank is filled?
A bike rental company rents out 24 bikes in the morning and 16 bikes in the afternoon. What is the average number of bikes rented out per period?
A student scored an average of 85 on 4 math tests. If the student wants to get an average of 90 for 5 math tests, how much does the student need to score on the 5th test?
Tom has 18 meters of fencing and wants to enclose a rectangular area with an existing barn as one side. If the barn is 6 meters wide, what is the maximum area Tom can enclose?
In a triangle, the length of the two sides are 5 cm and 7 cm. What is the range of possible lengths of the third side?
A factory produces 250 boxes of chocolates per day. If each box contains 12 chocolates, how many chocolates are produced in a 5-day week?
A car travels from city A to city B at an average speed of 60 km/h and returns at an average speed of 40 km/h. What is the average speed of the car for the round trip?
A swimming pool is 15 meters long, 8 meters wide, and 2 meters deep. If the pool is filled with water at a rate of 0.5 cubic meters per minute, how many minutes will it take to fill the pool?
What is the length of the line segment joining the points (2,3) and (5,7) on a coordinate plane?
What is the probability that a randomly drawn marble from a bag containing 5 red marbles, 3 blue marbles, and 2 green marbles is blue?
A bakery has 5 bags of flour, each containing 2 kilograms of flour, and 3 bags of sugar, each containing 1 kilogram of sugar. How many kilograms of ingredients are there in total?
If a bicycle travels 45 kilometers in 3 hours, how many kilometers will it travel in 7 hours at the same rate?
A group of students has 12 more girls than boys, and the total number of students is 36. How many boys are there in the group?
A car travels from City A to City B at a speed of 60km/h. How many hours will it take to travel 210km?
A bag contains 12 identical marbles. How many ways can a set of 3 marbles be drawn from the bag?
A rectangular prism has a volume of 48 cubic inches. If the length and the width of the prism are 4 inches, what is the height?
A factory produces 200 gadgets per day. How many gadgets does it produce in 7 days?
The perimeter of a triangle is 21 inches. If one side of the triangle has a length of 7 inches and another side has a length of 5 inches, what is the length of the third side?
A triangle has two sides of length 5 cm and 12 cm. What is the length of the third side?
A bicycle is on sale for $80, which is 20% off the original price. What was the original price of the bicycle?
It takes 5 machines 5 minutes to make 5 toys. How many minutes will it take 100 machines to make 100 toys?
What is the value of y in the equation 2y - 3 = 11?
A water tank can hold 3000 liters of water. If 1200 liters of water are already in the tank, how much more water can be added?
Raven has 18 bags of apples. Each bag has 6 apples. How many apples does Raven have in total?
Ethan has 12 more stickers than his friend Alex. If Ethan has 25 stickers, how many stickers does Alex have?
What is the value of y in the equation 4y - 2 = 14?
A bookshelf has 12 shelves, and each shelf can hold 8 books. If the bookshelf is currently empty, how many books can be placed on it in total?
Maya has 5 more pencils than her brother Jake. If Maya has 17 pencils, how many pencils does Jake have?
A rectangular garden measures 8 meters by 5 meters. If a path that is 2 meters wide is built around the garden, what is the area of the path?
If a bakery sells a total of 480 muffins and 240 croissants, and the ratio of muffins to croissants is 2 : 1, how many muffins does the bakery sell per day?
A cube has an edge of 5 cm. What is the volume of the cube?
A student reads 12 pages in 4 days. At this rate, how many days will it take to read 36 pages?
If a bicycle travels 36 km in 2 hours, what is the average speed of the bicycle in km per hour?
Tom has 18 identical stickers in his album. If he adds 8 more identical stickers to his album, what is the probability that a randomly selected sticker from his album is one of the new stickers?
A bookshelf has 5 red books, 8 blue books, and 2 green books. What is the probability that a randomly selected book is not red?
What is the sum of the interior angles of a pentagon?
A bicycle and a helmet together cost $120. The bicycle costs $90 more than the helmet. How much does the helmet cost?
In an isosceles triangle, the length of the base is 8 and one of the equal sides is 10. What is the length of the other equal side?
A sphere has a radius of 5 cm. What is its surface area?
A cylinder has a height of 15 meters and a radius of 4 meters. What is its volume?
A bag of apples weighs 36 kilograms. If Sara wants to divide it equally into 6 baskets, how many kilograms of apples will each basket contain?
Alex has 18 liters of juice in a container. He pours 2 liters into a bottle, 4 liters into another, and 3 liters into a third. How much juice does he have left?
What is the surface area of a rectangular prism that is 9 cm by 5 cm by 8 cm?
A cylindrical tank has a radius of 5 meters and a height of 8 meters. What is the volume of the tank?
Rachel has 4 identical suitcases containing 9 identical bags. Each bag contains 2 identical shirts. How many shirts does Rachel have in total?
A triangle has two angles measuring 35 degrees and 70 degrees. What is the measure of the third angle?
Ben used 24 pounds of flour to bake 4 batches of cookies. How many pounds of flour did Ben use to bake each batch?
Sophia has 50 stickers in her collection originally. She gave 12 stickers to her sister and then added 25 more stickers. How many stickers does Sophia have now?
Sarah can type 30 words per minute. How many words will she type in 5 minutes?
A car traveled 240 miles in 4 hours. How many miles will it travel in 7 hours?
A store sells 120 pounds of coffee at $4 per pound. How much money did the store make in total?
What is the probability that a random card drawn from a deck of 52 cards is a King?
The perimeter of a rectangle is 36 inches. If the length is 4 inches more than the width, what is the length of the rectangle?
If tan(y) = 2/3, what is sec(y)?
A rectangular prism with length 6 cm, width 4 cm, and height 8 cm is filled with sand. What is the volume of the sand?
A man can type 30 words per minute and his secretary can type 40 words per minute. If they work together, how many words can they type in 10 minutes?
What is the value of z in the equation 4z - 2 = 16?
A box contains 8 black socks, 2 white socks, and 3 gray socks. What is the probability that a randomly selected sock is gray or black?
A bookshelf has 5 shelves, and each shelf can hold 8 books. If the bookshelf is currently empty, how many books can be placed on it in total?
A group of friends want to share some candy equally. If they have 48 pieces of candy and there are 8 friends, how many pieces of candy will each friend get?
A company has 15 employees, and each employee earns a salary of $40,000 per year. What is the total annual salary of all employees?
A farmer has 18 baskets of apples. Each basket contains 12 apples. How many apples does the farmer have in total?
A car's gas tank can hold 12 gallons of gas. If the car's gas tank is currently 3/4 full, how many gallons of gas are in the tank?
A bakery produces 500 loaves of bread per day. If it operates 7 days a week, how many loaves of bread does it produce in a month of 30 days?
What is the value of y if 5y - 2 = 13?
The sum of three consecutive integers is 30. What is the smallest of these integers?
The cost of a shirt is 20% more than the cost of a pair of pants. If the cost of a pair of pants is $40, what is the cost of the shirt?
A car travels from town A to town B at 80 km/h and returns at 60 km/h. What is the average speed for the round trip?
What is the sum of all the factors of 12?
In the figure, CD is a straight line and angle E is 75 degrees. What is the measure of angle F?
A box contains 18 pens, 9 of whom are black and the rest are blue. If 6 blue pens are removed, what fraction of blue pens are removed?
A basket contains 25 oranges. If we randomly select 5 oranges from the basket, what is the probability that exactly 2 orange is rotten?
What is the value of y if 3y - 2 = 14?
What is the sum of the interior angles of a triangle with angles a, b and c, where a = 30, b = 60, and c = x?
A bakery sells 250 loaves of bread per day. If they operate 7 days a week, how many loaves of bread do they sell in a week?
What is the value of x if x + 2 = 7?
A bookshelf has 5 shelves, and each shelf can hold 8 books. If the bookshelf is currently empty, how many books can be placed on it in total?
A car travels from city A to city B at a speed of 60 km/h. If the distance between the two cities is 240 km, how many hours will the trip take?
A bookshelf has 5 shelves, and each shelf can hold 8 books. If the bookshelf is currently empty, how many books can be placed on it in total?
A factory produces 1200 units of a product per day. They operate 8 hours a day. How many units of the product are produced per hour?
A car travels from city A to city B at an average speed of 60 km/h. If the distance between the two cities is 240 km, how long will the trip take?
A box contains 18 red balls, 12 blue balls, and 10 green balls. What is the ratio of red balls to green balls?
A person invests $5000 in a savings account that earns a 5% annual interest rate. How much will the person have after 2 years?
A bookshelf has 5 shelves, and each shelf can hold 8 books. If the bookshelf is currently empty, how many books can be placed on it in total?
A car is traveling from City X to City Y at a constant speed of 60 kilometers per hour. If the distance between City X and City Y is 300 kilometers, how many hours will the car take to cover the distance?
A water tank can hold 1200 liters of water. If 480 liters of water are already in the tank, what percentage of the tank is filled?
A bakery is making a special batch of cookies for a holiday sale. They need to package 480 cookies in boxes of 12. How many boxes can they make?
13 in base 9 is equal to what in base 10?
A rectangular garden measures 15 meters by 8 meters. If a path of 2 meters is built around the garden, what is the area of the path?
A bakery sells 250 loaves of bread per day. If they increase their production by 15%, how many loaves of bread will they sell per day?
A cyclist travels 30 kilometers in 2 hours. How many kilometers will she travel in 5 hours at the same rate?
A group of friends want to share some candy equally. If they have 48 pieces of candy and there are 8 friends, how many pieces of candy will each friend get?
A water tank can hold 1200 liters of water. If 300 liters of water are already in the tank, how much more water can be filled into the tank?
Abigail, a painter, uses 3/4 of a liter of paint to paint a room. If she needs to paint 5 rooms, how many liters of paint will she need in total?
A bakery sells a total of 250 loaves of bread and buns in a day. If the number of loaves of bread is 30 more than the number of buns, how many loaves of bread did the bakery sell?
A triangle has an angle that measures 40 degrees. What is the measure of one of the remaining angles if the third angle measures 20 degrees more than the second angle?
A library has a total of 1500 books, with 45% of the books being hardcovers. How many books are paperbacks?
A cyclist travels from City A to City B at an average speed of 20 km/h and returns at an average speed of 25 km/h. What is the average speed of the cyclist for the round trip?
A bookshelf has 15 shelves, and each shelf can hold 8 books. If the bookshelf is currently empty, how many books can be placed on it in total?
What is the mode of the following dataset: 12, 15, 18, 12, 20, 15, 12, 18?
If a bakery sells 240 loaves of bread per day, and each loaf costs $2.50, what is the bakery's total revenue per day?
A car travels 250 miles in 5 hours. How many miles does it travel per hour?
A triangular prism has a base area of 30 square centimeters and a height of 10 centimeters. What is its volume?
In a certain library, 40% of the books are fiction. If there are 250 books in total, how many fiction books are there in the library?
A car is driving from City A to City B at a speed of 60 mph. How many hours will it take for the car to travel 210 miles?
What is the value of x, if 2x + 5 = 11?
A swimming pool holds 1200 gallons of water. If 40% of the water has evaporated, how many gallons of water are left?
A reguler hexagon has a side length of 6 inches. What is the perimeter of the hexagon?
A store owner has 9 crates of apples. Each crate contains 18 baskets and each basket contains 12 apples. If the owner wants to pack 12 apples in a new basket, how many new baskets are required?
A restaurant meal costs $32. They offer a 15% discount on Sundays. How much will the meal cost on Sundays?
A manufacturing unit produces 360 units of a product per day. They pack 15 units in each box. How many boxes do they need?
A train travels from City X to City Y. If it travels 300 miles in 5 hours, how many miles will it travel in 9 hours?
The perimeter of a rectangle is 48 and its width is 8. What is its length?
The perimeter of a square is 40 meters. If the length of its diagonal is 14 meters, what is its side length?
A car travels 250 kilometers in 5 hours. If the car travels at the same speed, how far will it travel in 2 hours?
A school has 30 classrooms, and each classroom has 30 chairs. How many chairs are there in total in the school?
A rectangular prism has a length of 10 meters, a width of 5 meters, and a height of 3 meters. What is its volume?
A water tank can hold 6000 liters of water. If 3500 liters of water are already in the tank, how much more water can it hold?
Felicia needs to purchase 12 identical bags of apples. Each bag contains 20 apples and costs 5 dollars. How much will Felicia pay in total?
In a jar of 15 candies, 5 are sour, 7 are sweet, and the rest are salty. What is the probability of randomly selecting a salty candy?
A bicycle travels from City X to City Y at an average speed of 25 km/h and returns at an average speed of 30 km/h. What is the average speed of the bicycle for the entire trip?
A ladder is leaning against a wall at a height of 80 feet above the ground. If the ladder makes an angle of 45 degrees with the horizontal, how long is the ladder?
Lucas is building a triangular tent with a base of 8 meters and a height of 12 meters. If he wants to cover the entire tent with a tarp, what is the area of the tarp?
A car travels 120 miles in 2 hours. How many miles does it travel per hour?
A group of friends want to share some money equally. If they have $360 and there are 8 friends, how much money will each friend get?
In a test, 30 students passed. If this represents 75% of the total, how many students took the test?
A bookstore is having a sale where everything is 20% off. If a book is originally priced at $40, how much will it cost during the sale?
If a bakery sells 240 loaves of bread in a day and each loaf costs $2, how much money does the bakery make in a day?
Tom has 12 boxes of crayons, and each box contains 24 crayons. If Tom wants to share the crayons equally among 4 of his friends, how many crayons will each friend get?
A bakery sells 250 loaves of bread per day. If they operate 7 days a week, how many loaves of bread do they sell in a week?
If it takes 5 hours to walk 15 km, how many hours will it take to walk 30 km at the same rate?
A swimming pool has 12 meters of water, and the water level decreases by 0.5 meters per day. How many days will it take for the water level to decrease to 9 meters?
In a garden, 15 rows of flowers have 12 flowers in each row. If 4 rows of flowers are removed, how many flowers are left in the garden?
A bakery wants to package 72 cookies equally in boxes. If they have 9 boxes, how many cookies will each box hold?
In a city, the ratio of cars to bicycles is 8:3. If there are 240 vehicles in the city, how many bicycles are there?
A group of friends want to split a cost of $240. If they want to split it in the ratio 2:3:5, how much should each friend pay?
What is the value of x in the equation cos(x) = 4/7?
A group of friends want to know the probability of drawing a king from a standard deck of 52 playing cards. What is the probability?
A t-shirt costs $18. The store offers a 20% discount on all purchases over $50. If you buy 4 t-shirts, how much will you pay in total after the discount?
Rachel has 18 boxes of cookies to sell at the bake sale. If each box contains 12 packets of cookies, and each packet sells for $2, how much money will Rachel make in total?
A rectangular garden measures 30 meters by 20 meters. If a path that is 2 meters wide is built around the garden, what is the area of the path?
A water tank can hold 1200 liters of water. If 3/5 of the tank is already filled, how many more liters of water can be added?
A company has 20 employees, and each employee earns an average of $40,000 per year. If the company gives a 10% raise to all employees, how much will the total salary expense be for the company?
Ms. Rodriguez has 12 bags of oranges. If each bag contains 16 oranges, how many oranges does Ms. Rodriguez have in total?
David can run 5 kilometers in 30 minutes. How many kilometers can he run in 1 hour?
A bakery sells 250 loaves of bread per day. If each loaf costs $0.50, how much money does the bakery make in a day?
A group of friends want to share some candy equally. If they have 48 pieces of candy and there are 8 friends, how many pieces of candy will each friend get?
A bicycle travel from City A to City B at an average speed of 20 km per hour. If the distance between the two cities is 120 km, how many hours does it take for the bicycle to travel from City A to City B?
A rectangular box has a volume of 48 cubic feet. If the length and the width are 4 feet and 3 feet respectively, what is the height of the box?
A bicycle travels from point A to point B at an average speed of 20 km/h and returns at an average speed of 30 km/h. What is the average speed for the whole trip?
The base of a triangle is 5 units and the area of the triangle is 20 square units. What is the height of the triangle?
A company sells 15 units of a product at $50 each. What is the total amount of money the company earns in a day?
In a circle, the measure of the central angle is 60 degrees. What is the measure of the arc cut off by this angle?
A cylindrical tank has a diameter of 2 meters and a height of 4 meters. What is the volume of the tank?
A group of 5 friends want to share some candy equally. If they have a total of 80 pieces of candy, how many pieces will each friend get?
A library has 300 books on its shelves, of which 120 are fiction books. If 20% of the fiction books and 15% of the nonfiction books are borrowed, how many books are left on the shelves?
The average of 8 numbers is 9. If the average of 5 of those numbers is 11, what is the average of the remaining 3 numbers?
A company sells 240 smartphones, 180 laptops, and 120 tablets per month. If the profit margins on smartphones, laptops, and tablets are 20%, 15%, and 10%, respectively, what is the total profit?
A bakery sells 250 loaves of bread per day and 150 pastries. If they buy bread flour at $3 per bag and can make 20 loaves of bread with one bag, what is the total cost of bread flour per day?
A triangle has angles of 20°, 50°, and x°. What is the value of x?
At a school, there are 10 teachers and 200 students. If each teacher is assigned to 20 students, how many students remain without a teacher?
In a box, there are 12 pens, 8 pencils, and 4 markers. If Sarah randomly selects a writing instrument from the box, what is the probability that it is a pen?
A bookshelf has 5 books of poetry, 8 books of fiction, and 12 books of non-fiction. If 3 books of poetry and 2 books of fiction are removed, what is the total number of books remaining on the bookshelf?
What is the average of the following set of data: 12, 15, 18, 20, 22?
A bike costs $80. They offer a 15% discount. How much will the bike cost after the discount?
Eric invested $2000 into a savings account. He withdrew {} of the total amount in his account. What fraction of his original balance did he withdraw?
A factory has 25 kilograms of sugar. They pack it into bags of 0.25 kilograms each. How many bags of sugar does the factory have now?
The perimeter of a triangle is 42 inches. If the length of two sides of the triangle are 12 inches and 10 inches, what is the length of the third side?
A bakery produces 250 loaves of bread per day, and each loaf is sold for $2. If the bakery operates 7 days a week, how much money does it make in a week?
A car travels from City A to City B at an average speed of 60 km/h and returns at an average speed of 40 km/h. If the distance between the two cities is 240 km, what is the average speed of the car for the entire trip?
What is the value of y in the equation 3y - 2 = 14?
Sarah can type 50 words per minute, and her friend Emily can type 30 words per minute. If they work together for 2 hours, how many words will they type in total?
[truncated: 5,407 more rows]
