# Supplementary material
Source: ML conference proceedings conference paper supplement (https://openreview.net/forum?id=8mM5NzC7da)
Supplement: supplementary_material [file OOD_samples_llama-3-70b-instruct_rust_augmented_beaver-withresponses.xlsx]

## Sheet: Sheet
Questions	Answers
Write a function named count_vowels that takes a string as input and returns the count of vowels in the string.	fn count_vowels(s: &str) -> i32 { let mut count = 0; for c in s.to_lowercase().chars() { match c { 'a' | 'e' | 'i' | 'o' | 'u' => count += 1, _ => (), } } count }
Write a function named findreatest that takes three integers as input and returns the greatest of the three integers.	fn find_greatest(a: i32, b: i32, c: i32) -> i32 { if a >= b && a >= c { a } else if b >= a && b >= c { b } else { c } }
Write a function named count_consonants that takes a string as input and returns the count of consonants in the string.	fn count_consonants(s: &str) -> i32 { let mut count = 0; for c in s.to_lowercase().chars() { match c { 'a' | 'e' | 'i' | 'o' | 'u' => (), _ if c.is_alphabetic() => count += 1, _ => (), } } count }
Write a function named is_palindrome that takes a string as input and returns True if the string is a palindrome, False otherwise.	fn is_palindrome(s: &str) -> bool { let s = s.to_lowercase(); let chars: Vec<char> = s.chars().collect(); let mut i = 0; let mut j = chars.len() - 1; while i < j { if chars[i] != chars[j] { return false; } i += 1; j -= 1; } true }
Write a function named find_mean that takes a list of numbers as input and returns the mean of the numbers.	fn find_mean(numbers: Vec<f64>) -> f64 { let sum: f64 = numbers.iter().sum(); sum / numbers.len() as f64 }
Write a Rust function that takes an integer as input and returns true if the integer is a palindrome, false otherwise.	fn is_palindrome(n: i32) -> bool { let reversed: i32 = n.to_string().chars().rev().collect::<String>().parse().unwrap(); n == reversed }
Create a Rust function that takes a vector of strings as input and returns a new vector with all strings converted to uppercase.	fn to_uppercase(vec: Vec<String>) -> Vec<String> { vec.into_iter().map(|s| s.to_uppercase()).collect() }
Write a Rust function that takes a vector of integers as input and returns the count of odd numbers in the vector.	fn count_odd_numbers(vec: Vec<i32>) -> i32 { vec.into_iter().filter(|x| x % 2 != 0).count() as i32 }
Write a Rust function that takes two vectors of integers as input and returns a new vector with the elements from both vectors in ascending order.	fn merge_sorted(vec1: Vec<i32>, vec2: Vec<i32>) -> Vec<i32> { let mut merged: Vec<i32> = vec1.into_iter().chain(vec2.into_iter()).collect(); merged.sort_unstable(); merged }
Write a Rust function that takes a vector of integers as input and returns the maximum sum of any subarray within the vector.	fn max_subarray_sum(vec: Vec<i32>) -> i32 { let mut max_current = vec[0]; let mut max_global = vec[0]; for &x in &vec[1..] { max_current = std::cmp::max(x, max_current + x); max_global = std::cmp::max(max_global, max_current); } max_global }
Write a function called find_largest_digit that takes an integer as input and returns the largest digit in that number.	fn find_largest_digit(n: i32) -> i32 { let mut largest_digit = 0; let mut num = n; while num > 0 { let digit = num % 10; if digit > largest_digit { largest_digit = digit; } num /= 10; } largest_digit }
Write a function called has_even_number that takes a list of integers as input and returns true if at least one of the numbers in the list is even, false otherwise.	fn has_even_number(numbers: Vec<i32>) -> bool { for &num in numbers.iter() { if num % 2 == 0 { return true; } } false }
Write a function called is_palindrome that takes a string as input and returns true if the string is a palindrome, false otherwise.	fn is_palindrome(s: &str) -> bool { let s = s.to_lowercase(); let chars: Vec<char> = s.chars().collect(); let mut left = 0; let mut right = chars.len() - 1; while left < right { if chars[left] != chars[right] { return false; } left += 1; right -= 1; } true }
Write a function called calculate_average that takes a list of integers as input and returns their average.	fn calculate_average(numbers: Vec<i32>) -> f64 { let sum: i32 = numbers.iter().sum(); sum as f64 / numbers.len() as f64 }
Write a function called count_vowels that takes a string as input and returns the number of vowels in that string.	fn count_vowels(s: &str) -> usize { let mut count = 0; for c in s.to_lowercase().chars() { match c { 'a' | 'e' | 'i' | 'o' | 'u' => count += 1, _ => (), } } count }
Write a Rust function that takes a string as an input and returns the number of vowels in the string.	fn count_vowels(input_string: &str) -> i32 { let mut count: i32 = 0; for char in input_string.to_lowercase().chars() { match char { 'a' | 'e' | 'i' | 'o' | 'u' => count += 1, _ => {} } } count }
Create a function to check if a given number is a power of 2.	fn is_power_of_two(n: i32) -> bool { n > 0 && (n & (n - 1)) == 0 }
Write a Rust function that takes a vector of integers as input and returns the maximum value in the vector.	fn max_value(vec: Vec<i32>) -> i32 { *vec.iter().max().unwrap() }
Create a function to check if a given string contains any digits.	fn contains_digit(input_string: &str) -> bool { input_string.chars().any(char::is_digit) }
Write a Rust function that takes a string as an input and returns the string with all vowels removed.	fn remove_vowels(input_string: &str) -> String { input_string.chars().filter(|c| !matches!(c.to_lowercase(), 'a' | 'e' | 'i' | 'o' | 'u')).collect() }
Create a program that asks the user for their favorite color and then prints out a message related to that color.	fn favorite_color() { let mut color = String::new(); println!("Enter your favorite color:"); std::io::stdin().read_line(&mut color).expect("Failed to read line"); let color = color.trim(); match color { "Red" => println!("A bold choice!"), "Blue" => println!("A calming choice!"), "Green" => println!("A natural choice!"), _ => println!("Interesting choice!"), } }
Write a function to count the number of even numbers in a list.	fn count_evens(numbers: Vec<i32>) -> i32 { let mut count = 0; for num in numbers { if num % 2 == 0 { count += 1; } } count }
Write a function to calculate the area of a rectangle given its length and width.	fn rectangle_area(length: f64, width: f64) -> f64 { length * width }
Write a function to remove all occurrences of a given word from a string.	fn remove_word(text: String, word: String) -> String { text.replace(&word, "") }
Write a function to check if a given string is a palindrome.	fn is_palindrome(text: String) -> bool { let reversed: String = text.chars().rev().collect(); text.to_lowercase() == reversed.to_lowercase() }
Create a function that takes a list of integers and returns the maximum sum of non-adjacent elements in the list.	fn max_sum_non_adjacent(nums: Vec<i32>) -> i32 { if nums.is_empty() { return 0; } if nums.len() <= 2 { return *nums.iter().max().unwrap(); } let mut dp = vec![0; nums.len()]; dp[0] = nums[0]; dp[1] = i32::max(nums[0], nums[1]); for i in 2..nums.len() { dp[i] = i32::max(dp[i-1], dp[i-2] + nums[i]); } dp[nums.len()-1] }
Write a function that takes a string and returns True if the string consists entirely of printable ASCII characters, False otherwise.	fn all_printable_ascii(s: &str) -> bool { s.chars().all(|c| c.is_ascii() && c.is_graphic()) }
Create a function that takes a list of integers and returns the maximum product of three numbers in the list.	fn max_product_three(nums: Vec<i32>) -> i32 { let mut nums = nums; nums.sort(); i32::max(nums[0] * nums[1] * nums[nums.len()-1], nums[nums.len()-1] * nums[nums.len()-2] * nums[nums.len()-3]) }
Implement a function that takes a string and returns the longest prefix of the string that is also a suffix.	fn longest_prefix_suffix(s: &str) -> &str { let len = s.len(); for i in (1..len/2+1).rev() { if &s[..i] == &s[len-i..] { return &s[..i]; } } "" }
Create a function that takes a list of integers and returns True if the list contains a 1, 4, 5 or a 9, False otherwise.	fn contains_special_num(nums: Vec<i32>) -> bool { nums.iter().any(|&n| [1, 4, 5, 9].contains(&n)) }
Create a function that takes a string as an input and returns the string with all lowercase characters converted to uppercase.	fn convert_to_uppercase(s: &str) -> String { s.to_uppercase() }
Write a function that takes a list of integers as input and returns the average of all the elements in the list, rounded to two decimal places. If the list is empty, it should return 0.0.	fn calculate_average(numbers: Vec<i32>) -> f64 { if numbers.is_empty() { 0.0 } else { let sum: i32 = numbers.iter().sum(); (sum as f64) / numbers.len() as f64 } }
Implement a function that takes a string as an input and returns true if the string is a palindrome, otherwise it returns false.	fn is_palindrome(s: &str) -> bool { let reversed: String = s.chars().rev().collect(); s.to_lowercase() == reversed.to_lowercase() }
Write a function that takes a number as an input and returns the factorial of the number.	fn calculate_factorial(n: u32) -> u32 { if n == 0 { 1 } else { n * calculate_factorial(n - 1) } }
Create a function that takes a list of strings as an input and returns the longest string in the list. If the list is empty, it should return an empty string.	fn find_longest_string(strings: Vec<&str>) -> &str { strings.iter().max_by_key(|s| s.len()).unwrap_or("") }
Write a function that takes a string as an input and returns true if the string has at least one uppercase letter, false otherwise.	fn has_uppercase(s: &str) -> bool { for c in s.chars() { if c.is_uppercase() { return true; } } false }
Write a function that takes a list of integers as an input and returns a new list with all the prime numbers from the original list.	fn filter_primes(numbers: Vec<i32>) -> Vec<i32> { fn is_prime(n: i32) -> bool { if n <= 1 { return false; } let mut i = 2; while i * i <= n { if n % i == 0 { return false; } i += 1; } true } numbers.into_iter().filter(|x| is_prime(*x)).collect() }
You are given a string of parentheses. Write a function to check if the parentheses are balanced.	fn is_balanced(s: &str) -> bool { let mut stack: Vec<char> = Vec::new(); for c in s.chars() { match c { '(' => stack.push(')'), ')' => { if stack.pop() != Some(')') { return false; } } _ => return false, } } stack.is_empty() }
Write a function that takes a string as an input and returns the string with all duplicate characters removed.	fn remove_duplicates(s: &str) -> String { let mut result: String = String::new(); for c in s.chars() { if !result.contains(c) { result.push(c); } } result }
Write a function that takes a list of strings as an input and returns the longest string in the list.	fn longest_string(strings: Vec<String>) -> String { strings.into_iter().max_by_key(|s| s.len()).unwrap_or_default() }
Write a Rust function to find the maximum value in a list of integers.	fn find_max_value(numbers: Vec<i32>) -> i32 { let mut max = numbers[0]; for &num in &numbers[1..] { if num > max { max = num; } } max }
Create a Rust function that takes a list of characters and returns the first unique character in the list.	fn find_unique_character(characters: Vec<char>) -> char { for &char in &characters { let count = characters.iter().filter(|&&c| c == char).count(); if count == 1 { return char; } } ' ' }
Develop a Rust function to find the sum of all odd numbers in a list of integers.	fn sum_odd_numbers(numbers: Vec<i32>) -> i32 { numbers.into_iter().filter(|&&num| num % 2 != 0).sum() }
Implement a Rust function that takes a list of strings and returns the total number of characters in the list.	fn count_total_characters(strings: Vec<String>) -> i32 { strings.into_iter().map(|s| s.len() as i32).sum() }
Write a Rust function to find the first pair of integers in a list that add up to a given target value.	fn find_pair_with_target_sum(numbers: Vec<i32>, target_sum: i32) -> (i32, i32) { for i in 0..numbers.len() { for j in i + 1..numbers.len() { if numbers[i] + numbers[j] == target_sum { return (numbers[i], numbers[j]); } } } (-1, -1) }
Write a Rust function to return the sum of the first n even natural numbers.	fn sum_of_evens(n: i32) -> i32 { let mut sum: i32 = 0; for i in 0..n { sum += 2 * i; } sum }
Design a Rust function that prints out the multiplication table of a given number n.	fn multiplication_table(n: i32) { for i in 1..=10 { println!("{} * {} = {}", n, i, n * i); } }
Write a Rust function to return the nth Fibonacci number.	fn fibonacci(n: i32) -> i32 { match n { 0 => 0, 1 => 1, _ => fibonacci(n - 1) + fibonacci(n - 2), } }
Write a Rust function to check if a given number is divisible by 3 and 5.	fn divisible_by_3_and_5(n: i32) -> bool { n % 3 == 0 && n % 5 == 0 }
Design a Rust function to print out the factorial of a given number n.	fn factorial(n: i32) { let mut result: i32 = 1; for i in 1..=n { result *= i; } println!("The factorial of {} is {}", n, result); }
Write a function that takes a string as an input and returns the string with all consonants removed.	fn remove_consonants(s: &str) -> String { let mut result = String::new(); for c in s.chars() { if "aeiouAEIOU".contains(c) { result.push(c); } } result }
Write a function that takes a list of floats and returns the count of all numbers in the list that are less than or equal to 5.0.	fn count_less_than_or_equal_to_five(fs: &[f64]) -> i32 { let mut count = 0; for &f in fs { if f <= 5.0 { count += 1; } } count }
Create a Rust function that takes a string as input and returns the string with all characters in uppercase.	fn to_uppercase(s: &str) -> String { s.to_uppercase() }
Write a Rust function that takes a list of strings as input and returns the count of all strings in the list that are longer than 5 characters.	fn count_strings_longer_than_five(ss: &[&str]) -> i32 { let mut count = 0; for s in ss { if s.len() > 5 { count += 1; } } count }
Write a Rust function that takes a list of tuples containing two integers as input and returns the sum of all the first elements in the tuples.	fn sum_first_elements(ts: &[&(i32, i32)]) -> i32 { let mut sum = 0; for &(a, _) in ts { sum += a; } sum }
Write a function that takes two strings as an input and returns the number of common characters between the two strings.	fn count_common_chars(s1: &str, s2: &str) -> usize { let mut count = 0; let s1_chars: Vec<char> = s1.to_lowercase().chars().collect(); let s2_chars: Vec<char> = s2.to_lowercase().chars().collect(); for c in s1_chars { if s2_chars.contains(&c) { count += 1; } } count }
Create a function that takes a list of integers as input, removes duplicates, and returns a new list containing the remaining numbers.	fn remove_duplicates(mut numbers: Vec<i32>) -> Vec<i32> { numbers.sort(); numbers.dedup(); numbers }
Write a function that takes a list of strings as an input and returns the longest string in the list.	fn find_longest_string(strings: Vec<&str>) -> &str { strings.into_iter().max_by_key(|s| s.len()).unwrap() }
Create a function that takes a string as an input, reverses the order of its characters, and returns the reversed string.	fn reverse_string(s: &str) -> String { s.chars().rev().collect() }
Write a function that takes a list of integers as an input, multiplies all the numbers in the list together, and returns the product.	fn multiply_all(numbers: Vec<i32>) -> i32 { numbers.into_iter().fold(1, |acc, x| acc * x) }
Write a Rust function that takes an integer n as input and returns a vector of Fibonacci numbers up to the nth number.	fn fibonacci(n: i32) -> Vec<i32> { let mut fib = vec![0, 1]; let mut a = 0; let mut b = 1; let mut i = 2; while i <= n { let c = a + b; fib.push(c); a = b; b = c; i += 1; } fib.truncate(n as usize); fib }
Write a Rust function that takes a string s as input and returns the string with all vowels removed.	fn remove_vowels(s: &str) -> String { let mut new_string = String::new(); for c in s.chars() { match c { 'a' | 'e' | 'i' | 'o' | 'u' | 'A' | 'E' | 'I' | 'O' | 'U' => {} _ => new_string.push(c), } } new_string }
Create a Rust function that takes a list of tuples, where each tuple contains a name as a string and an age as an integer, and returns a vector of strings where each string is in the format "Name is Age years old".	fn format_strings(list: &[(String, i32)]) -> Vec<String> { let mut result = Vec::new(); for &(ref name, age) in list { let string = format!("{} is {} years old", name, age); result.push(string); } result }
Write a Rust function that takes a vector of integers as input and returns the count of even numbers in the vector.	fn count_even_numbers(v: &Vec<i32>) -> i32 { let mut count = 0; for &num in v { if num % 2 == 0 { count += 1; } } count }
Write a Rust function that takes a string s as input and returns the string with all characters reversed.	fn reverse_string(s: &str) -> String { let mut chars: Vec<char> = s.chars().collect(); chars.reverse(); chars.into_iter().collect() }
Write a Rust function that takes a vector of characters as input and returns the count of vowels in the vector.	fn count_vowels(v: Vec<char>) -> i32 { let mut count = 0; for c in v { match c { 'a' | 'e' | 'i' | 'o' | 'u' | 'A' | 'E' | 'I' | 'O' | 'U' => count += 1, _ => (), } } count }
Write a Rust function to find the maximum value in a vector of i32.	fn max_value(v: Vec<i32>) -> i32 { let mut max = v[0]; for &val in v.iter() { if val > max { max = val; } } max }
Write a Rust function that takes a vector of strings as input and returns the count of strings with length greater than 5.	fn count_long_strings(v: Vec<String>) -> i32 { let mut count = 0; for s in v { if s.len() > 5 { count += 1; } } count }
Write a Rust function that takes a vector of integers as input, and returns a vector of integers that only contains the numbers that are divisible by 3.	fn numbers_divisible_by_3(v: Vec<i32>) -> Vec<i32> { v.into_iter().filter(|&&x| x % 3 == 0).collect() }
Write a Rust function that takes a vector of strings as input and returns the longest string in the vector.	fn longest_string(v: Vec<String>) -> Option<String> { v.into_iter().max_by_key(|s| s.len()) }
Write a Rust function to count the number of digits in a given integer.	fn count_digits(n: i32) -> i32 { if n == 0 { return 1; } let mut count = 0; let mut n = n.abs(); while n > 0 { n /= 10; count += 1; } count }
Create a Rust program that takes a vector of integers as input and returns a new vector containing all the unique elements from the input vector, preserving their original order.	fn unique_elements(v: Vec<i32>) -> Vec<i32> { let mut unique = Vec::new(); for i in v { if !unique.contains(&i) { unique.push(i); } } unique }
Write a Rust function that takes two integers as input and returns their greatest common divisor (GCD).	fn gcd(a: i32, b: i32) -> i32 { if b == 0 { a } else { gcd(b, a % b) } }
Create a Rust program that takes a string as input and returns the string in reverse order.	fn reverse_string(s: String) -> String { s.chars().rev().collect() }
Write a Rust function that takes a vector of integers as input and returns the minimum and maximum elements from the vector.	fn min_max(v: Vec<i32>) -> (i32, i32) { let min = *v.iter().min().unwrap(); let max = *v.iter().max().unwrap(); (min, max) }
Write a function that takes an integer as input and returns the sum of all divisors of that number excluding the number itself.	fn sum_of_divisors(n: i32) -> i32 { let mut sum = 0; for i in 1..n { if n % i == 0 { sum += i; } } sum }
Design a function that accepts a string as input and returns the string with all vowels removed.	fn remove_vowels(s: String) -> String { let mut result = String::new(); for c in s.chars() { if !("aeiouAEIOU".contains(c)) { result.push(c); } } result }
Write a function that takes a vector of integers as input and returns the second largest element in the vector.	fn second_largest(vec: Vec<i32>) -> Option<i32> { let mut max = i32::MIN; let mut second_max = i32::MIN; for &x in &vec { if x > max { second_max = max; max = x; } else if x > second_max && x != max { second_max = x; } } if second_max == i32::MIN { None } else { Some(second_max) } }
Write a function to check if a given string contains a certain substring.	fn contains_substring(s: String, sub: String) -> bool { s.contains(&sub) }
Design a function that accepts a vector of strings as input and returns the string with the maximum length.	fn longest_string(vec: Vec<String>) -> Option<String> { let mut max_len = 0; let mut max_str = "".to_string(); for s in &vec { if s.len() > max_len { max_len = s.len(); max_str = s.clone(); } } if max_str.is_empty() { None } else { Some(max_str) } }
Write a function that takes a string as input and returns the string with all vowels removed.	fn remove_vowels(s: String) -> String { let mut result = String::new(); for c in s.chars() { if !matches!(c, 'a' | 'e' | 'i' | 'o' | 'u' | 'A' | 'E' | 'I' | 'O' | 'U') { result.push(c); } } result }
Create a function that takes a list of integers as input and returns the sum of all even numbers in the list.	fn sum_even_numbers(nums: Vec<i32>) -> i32 { nums.into_iter().filter(|&x| x % 2 == 0).sum() }
Write a function that takes a string as input and returns the string with all characters in uppercase.	fn to_uppercase(s: String) -> String { s.to_uppercase() }
Create a function that takes a list of strings as input and returns the longest string in the list.	fn longest_string(strings: Vec<String>) -> String { strings.into_iter().max_by_key(|s| s.len()).unwrap() }
Write a function that takes two integers as input and returns the greatest common divisor of the two numbers.	fn gcd(a: i32, b: i32) -> i32 { if b == 0 { a } else { gcd(b, a % b) } }
Create a function `check_even` that takes an integer as an input and returns true if the number is even and false otherwise.	fn check_even(n: i32) -> bool { n % 2 == 0 }
Define a function `concat_strings` that takes three strings as input and returns a new string that is the concatenation of the three input strings.	fn concat_strings(s1: &str, s2: &str, s3: &str) -> String { format!("{}{}{}", s1, s2, s3) }
Write a function `find_length` that takes a string as an input and returns the length of the string.	fn find_length(s: &str) -> usize { s.len() }
Create a function `calculate_discount` that takes a price and a discount percentage as input and returns the discounted price.	fn calculate_discount(price: f64, discount: f64) -> f64 { price - (price * discount / 100.0) }
Develop a function `find_largest_num` that takes three integers as input and returns the largest of the three numbers.	fn find_largest_num(a: i32, b: i32, c: i32) -> i32 { if a >= b && a >= c { a } else if b >= a && b >= c { b } else { c } }
You are given an array of strings. Write a function that removes all the duplicate strings from the array and returns the resulting array in the same order as the original array.	fn remove_duplicates(arr: Vec<String>) -> Vec<String> { let mut unique_elements: Vec<String> = Vec::new(); for element in arr { if !unique_elements.contains(&element) { unique_elements.push(element); } } unique_elements }
Write a function that takes a string as input and returns the string with all vowels removed.	fn remove_vowels(s: String) -> String { let vowels: Vec<char> = "aeiouAEIOU".chars().collect(); let mut result: String = String::new(); for c in s.chars() { if !vowels.contains(&c) { result.push(c); } } result }
Given a list of integers, write a function to find the maximum product of a subarray within the given array.	fn max_product_subarray(arr: Vec<i32>) -> i32 { let mut max_product: i32 = arr[0]; let mut min_product: i32 = arr[0]; let mut result: i32 = arr[0]; for i in 1..arr.len() { if arr[i] < 0 { std::mem::swap(&mut max_product, &mut min_product); } max_product = std::cmp::max(arr[i], max_product * arr[i]); min_product = std::cmp::min(arr[i], min_product * arr[i]); result = std::cmp::max(result, max_prod…
A function takes a tree node as input and returns the number of nodes in the tree.	enum TreeNode { Node(i32, Box<TreeNode>, Box<TreeNode>), Nil, } fn count_nodes(node: &TreeNode) -> i32 { match node { TreeNode::Node(_, left, right) => 1 + count_nodes(left) + count_nodes(right), TreeNode::Nil => 0, } }
Write a function that takes a string as input and returns the string with all occurrences of the first character replaced by '*', except for the first character itself.	fn replace_chars(s: String) -> String { let mut result: String = String::new(); let first_char: char = s.chars().next().unwrap(); for c in s.chars() { if c != first_char { result.push('*'); } else { result.push(c); } } result }
Create a function 'larger' that takes two integers ('a' and 'b') as input and returns the larger of the two numbers.	fn larger(a: i32, b: i32) -> i32 { if a > b { a } else { b } }
Write a Rust function to find the total sum of all elements in a given vector of integers.	fn sum_elements(vector: Vec<i32>) -> i32 { let mut sum = 0; for element in vector { sum += element; } sum }
Create a function 'contains_vowel' that takes a string ('s') as input and returns true if the string contains at least one vowel, false otherwise.	fn contains_vowel(s: &str) -> bool { let vowels: &str = "aeiou"; for c in s.to_lowercase().chars() { if vowels.contains(c) { return true; } } false }
Write a Rust function to find the number of times a specified element ('x') appears in a given vector ('v').	fn count_occurrences(v: Vec<i32>, x: i32) -> i32 { let mut count = 0; for element in v { if element == x { count += 1; } } count }
Create a function 'is_palindrome' that takes a string ('s') as input and returns true if the string is a palindrome, false otherwise.	fn is_palindrome(s: &str) -> bool { let reversed: String = s.chars().rev().collect(); s.to_lowercase() == reversed.to_lowercase() }
Implement a function to find the maximum value in a given list of integers. The function should take a list of integers as input and return the maximum value.	fn find_max_value(numbers: Vec<i32>) -> i32 { let mut max_value = numbers[0]; for &value in numbers.iter() { if value > max_value { max_value = value; } } max_value }
Create a function that takes a string as input and returns the string in uppercase without any leading or trailing whitespaces.	fn uppercase_string(s: String) -> String { s.trim().to_uppercase() }
Write a function that takes a list of strings as input and returns the string with the maximum length. If there are multiple strings with the same maximum length, return the first one.	fn find_longest_string(strings: Vec<String>) -> String { let mut longest_string = String::new(); for s in strings { if s.len() > longest_string.len() { longest_string = s; } } longest_string }
You are given a dictionary where the keys are names of students and the values are their corresponding grades. Write a function `find_highest_grade` that takes this dictionary as an input and returns the name of the student with the highest grade.	fn find_highest_grade(grades: std::collections::HashMap<String, f64>) -> String { let mut highest_grade = 0.0; let mut highest_student = String::new(); for (student, grade) in grades { if grade > highest_grade { highest_grade = grade; highest_student = student; } } highest_student }
Implement a function to reverse the order of the elements in a given list of integers. The function should take a list of integers as input and return the reversed list.	fn reverse_list(numbers: Vec<i32>) -> Vec<i32> { let mut reversed_list: Vec<i32> = Vec::new(); for i in (0..numbers.len()).rev() { reversed_list.push(numbers[i]); } reversed_list }
Write a function to check whether a given string is a palindrome or not.	fn check_palindrome(s: String) -> bool { let reversed_s: String = s.chars().rev().collect(); s.to_lowercase() == reversed_s.to_lowercase() }
Write a function to find the largest element in an array of integers.	fn find_largest(arr: [i32]) -> i32 { let mut largest = arr[0]; for &num in arr.iter() { if num > largest { largest = num; } } largest }
Write a function to calculate the factorial of a given integer.	fn calculate_factorial(num: i32) -> i32 { let mut factorial = 1; for i in 1..=num { factorial *= i; } factorial }
Write a function to check whether a given number is a prime number or not.	fn check_prime(num: i32) -> bool { if num <= 1 { return false; } let mut i = 2; while i * i <= num { if num % i == 0 { return false; } i += 1; } true }
Write a function to find the longest word in a given string.	fn find_longest_word(s: String) -> String { let mut longest_word = ""; let mut max_length = 0; let words: Vec<&str> = s.split_whitespace().collect(); for word in words { let word_length = word.len(); if word_length > max_length { max_length = word_length; longest_word = word; } } longest_word.to_string() }
Write a function that takes a string as input and returns the string in uppercase. Name: uppercase.	fn uppercase(s: &str) -> String { s.to_uppercase() }
Write a function called calculate_sum_of_squares that takes a list of integers as input and returns the sum of the squares of each number in the list. Name: calculate_sum_of_squares.	fn calculate_sum_of_squares(numbers: Vec<i32>) -> i32 { numbers.into_iter().map(|x| x * x).sum() }
Write a function that takes two strings as input and returns true if the strings are equal, ignoring case sensitivity, and false otherwise. Name: strings_are_equal.	fn strings_are_equal(s1: &str, s2: &str) -> bool { s1.to_lowercase() == s2.to_lowercase() }
Write a function that takes a list of strings as input and returns a new list containing only the strings that start with a vowel. Name: filter_vowels.	fn filter_vowels(strings: Vec<&str>) -> Vec<&str> { strings.into_iter().filter(|s| "aeiouAEIOU".contains(&s.chars().next().unwrap())).collect() }
Write a function called calculate_average that takes a list of numbers as input and returns the average of the numbers. Name: calculate_average.	fn calculate_average(numbers: Vec<f64>) -> f64 { numbers.into_iter().sum::<f64>() / numbers.len() as f64 }
Write a function to find the maximum element in a list of integers. The function should take a list of integers as input and return the maximum element. If the list is empty, return None.	fn find_max(numbers: Vec<i32>) -> Option<i32> { if numbers.is_empty() { return None; } let mut max_number = numbers[0]; for &num in &numbers { if num > max_number { max_number = num; } } Some(max_number) }
Write a function to calculate the factorial of a given integer. The function should take an integer as input and return its factorial. If the input is negative, return None.	fn factorial(n: i32) -> Option<i32> { if n < 0 { return None; } let mut fact = 1; for i in 1..=n { fact *= i; } Some(fact) }
Write a function to check if a given string is a palindrome. The function should take a string as input and return true if the string is a palindrome, false otherwise.	fn is_palindrome(s: String) -> bool { let chars: Vec<char> = s.chars().collect(); let mut start = 0; let mut end = chars.len() - 1; while start < end { if chars[start] != chars[end] { return false; } start += 1; end -= 1; } true }
Write a function to calculate the average of a list of integers. The function should take a list of integers as input and return the average. If the list is empty, return None.	fn average(numbers: Vec<i32>) -> Option<f64> { if numbers.is_empty() { return None; } let sum: i32 = numbers.iter().sum(); let avg = sum as f64 / numbers.len() as f64; Some(avg) }
Write a function to remove duplicates from a list of integers. The function should take a list of integers as input and return a new list with duplicates removed. The original order of elements should be preserved.	fn remove_duplicates(numbers: Vec<i32>) -> Vec<i32> { let mut unique_numbers: Vec<i32> = Vec::new(); for &num in &numbers { if !unique_numbers.contains(&num) { unique_numbers.push(num); } } unique_numbers }
Write a Rust function to find the maximum value in a given vector of integers.	fn find_max(vec: Vec<i32>) -> i32 { let mut max_value = vec[0]; for &value in vec.iter() { if value > max_value { max_value = value; } } max_value }
Write a Rust function to check if a given string is a palindrome.	fn is_palindrome(s: String) -> bool { let chars: Vec<char> = s.chars().collect(); let mut left = 0; let mut right = chars.len() - 1; while left < right { if chars[left] != chars[right] { return false; } left += 1; right -= 1; } true }
Write a Rust function to calculate the dot product of two given vectors of floats.	fn fibonacci_sequence(n: u32) -> Vec<u32> { let mut sequence = vec![0, 1]; while sequence[sequence.len() - 1] < n { let next_num = sequence[sequence.len() - 1] + sequence[sequence.len() - 2]; sequence.push(next_num); } sequence }
Write a Rust function to reverse the order of elements in a given vector of strings.	fn dot_product(v1: Vec<f64>, v2: Vec<f64>) -> f64 { assert_eq!(v1.len(), v2.len()); let mut result: f64 = 0.0; for i in 0..v1.len() { result += v1[i] * v2[i]; } result }
Create a function `count_vowels` that takes a string as input and returns the count of vowels in the string.	fn count_vowels(s: &str) -> i32 { let mut count = 0; for c in s.chars() { match c.to_ascii_lowercase() { 'a' | 'e' | 'i' | 'o' | 'u' => count += 1, _ => {}, } } count }
Write a function `sort_list` that takes a list of integers as input and returns a new list with the elements in ascending order.	fn sort_list(mut list: Vec<i32>) -> Vec<i32> { list.sort_unstable(); list }
Create a function `find_pairs` that takes a list of integers as input and returns the count of pairs of integers that add up to 10.	fn find_pairs(list: Vec<i32>) -> i32 { let mut count = 0; for i in 0..list.len() { for j in i + 1..list.len() { if list[i] + list[j] == 10 { count += 1; } } } count }
Write a function `find_max_freq` that takes a list of strings as input and returns the string with the highest frequency.	fn generate_matrix(n: i32) -> Vec<Vec<i32>> { let mut matrix: Vec<Vec<i32>> = vec![vec![0; n as usize]; n as usize]; matrix }
Create a function called calculator that takes three arguments, a string indicating the operation and two integers, and returns the result of the operation.	fn calculator(operation: &str, a: i32, b: i32) -> i32 { match operation { "add" => a + b, "subtract" => a - b, "multiply" => a * b, "divide" => { if b == 0 { panic!("Error: Division by zero is not allowed"); } else { a / b } }, _ => panic!("Error: Invalid operation"), } }
Write a function to check if a given string is a palindrome, which reads the same backward as forward.	fn is_palindrome(s: &str) -> bool { let reversed: String = s.chars().rev().collect(); s.to_lowercase() == reversed.to_lowercase() }
Write a function to find the greatest common divisor (GCD) of two integers.	fn gcd(mut a: u32, mut b: u32) -> u32 { while b != 0 { let temp = b; b = a % b; a = temp; } a }
Create a function called convert_to_title that takes an integer as input and returns the corresponding Excel sheet title.	fn convert_to_title(n: i32) -> String { let mut result = String::new(); let mut n = n; while n > 0 { let c = ((n - 1) % 26) as u8 + b'A'; result.push(c as char); n = (n - 1) / 26; } result.chars().rev().collect() }
Write a function to find the minimum number of operations required to make all elements of an array equal.	fn min_operations(arr: Vec<i32>) -> i32 { let median = arr.into_iter().collect::<Vec<_>>(); median.into_iter().fold(0, |acc, &x| acc + (x - median[0]).abs()) }
Define a function that takes two integers as input and returns their greatest common divisor (GCD).	fn gcd(a: i32, b: i32) -> i32 { if b == 0 { a } else { gcd(b, a % b) } }
Write a function that takes a vector of integers as input and returns the count of even numbers in the vector.	fn count_evens(numbers: Vec<i32>) -> i32 { numbers.into_iter().filter(|x| x % 2 == 0).count() as i32 }
Write a function that takes a vector of strings as input and returns a vector of strings where all strings are in uppercase.	fn to_uppercase(strings: Vec<String>) -> Vec<String> { strings.into_iter().map(|s| s.to_uppercase()).collect() }
Define a function that takes a vector of integers as input and returns the second largest number in the vector.	fn second_largest(numbers: Vec<i32>) -> i32 { let mut unique_numbers: Vec<i32> = numbers.into_iter().collect(); unique_numbers.sort_unstable(); unique_numbers.get(unique_numbers.len() - 2).copied().unwrap_or(i32::MIN) }
Write a function that takes a 2D vector of integers as input and returns the average of all numbers in the 2D vector.	fn average(numbers: Vec<Vec<i32>>) -> f64 { let sum: i32 = numbers.into_iter().flatten().sum(); let count: i32 = numbers.into_iter().flatten().count() as i32; sum as f64 / count as f64 }
Implement a function to reverse a given string.	fn reverse_string(s: &str) -> String { s.chars().rev().collect() }
Create a function that takes a list of integers as input and returns the list of squares of each number.	fn square_list(numbers: Vec<i32>) -> Vec<i32> { numbers.into_iter().map(|x| x * x).collect() }
Write a function to find the maximum number in a given list of integers.	fn max_number(numbers: Vec<i32>) -> i32 { *numbers.iter().max().unwrap() }
Implement a function to remove duplicates from a given list while preserving the original order.	fn remove_duplicates(numbers: Vec<i32>) -> Vec<i32> { let mut unique_numbers: Vec<i32> = Vec::new(); for num in numbers { if !unique_numbers.contains(&num) { unique_numbers.push(num); } } unique_numbers }
Create a function that takes two strings as input and returns true if they are anagrams of each other, false otherwise.	fn is_anagram(s1: &str, s2: &str) -> bool { let s1_chars: Vec<char> = s1.chars().collect(); let s2_chars: Vec<char> = s2.chars().collect(); s1_chars.sort(); s2_chars.sort(); s1_chars == s2_chars }
You are given a list of strings as input. Write a function that takes this list as an argument and returns the longest string in the list.	fn longest_string(strings: Vec<String>) -> String { let mut longest = String::new(); for string in strings { if string.len() > longest.len() { longest = string; } } longest }
Create a Rust function that takes a list of integers as input and returns the count of all prime numbers in the list.	fn count_primes(numbers: Vec<i32>) -> i32 { let mut count = 0; for num in numbers { if is_prime(num) { count += 1; } } count } fn is_prime(n: i32) -> bool { if n <= 1 { return false; } let mut i = 2; while i * i <= n { if n % i == 0 { return false; } i += 1; } true }
Develop a Rust function that takes a string as input and returns a new string with all characters in uppercase.	fn to_uppercase(s: &str) -> String { s.to_uppercase() }
You are given a list of integers as input. Write a function that takes this list as an argument and returns a tuple containing the minimum and maximum values in the list.	fn min_max(numbers: Vec<i32>) -> (i32, i32) { let mut min = i32::MAX; let mut max = i32::MIN; for num in numbers { if num < min { min = num; } if num > max { max = num; } } (min, max) }
Create a Rust function that takes a list of strings as input and returns a new list containing all strings that start with a capital letter.	fn starts_with_capital(strings: Vec<String>) -> Vec<String> { let mut result = Vec::new(); for string in strings { if string.chars().next().unwrap().is_uppercase() { result.push(string); } } result }
Write a function named min_max_diff that accepts a list of integers as input and returns the difference between the maximum and minimum values in the list.	fn min_max_diff mut numbers: Vec<i32>) -> i32 { let max = *numbers.iter().max().unwrap(); let min = *numbers.iter().min().unwrap(); max - min }
Given a list of strings, write a function named shorter_select that returns the shorter string if the strings have different lengths, otherwise returns the first string.	fn shorter_select(mut strings: Vec<String>) -> String { if strings.len() < 2 { return strings.first().unwrap().clone(); } let str1_len = strings[0].len(); let str2_len = strings[1].len(); if str1_len < str2_len { strings[0].clone() } else { strings[1].clone() } }
Implement a function named is_palindrome that checks if a given string is a palindrome, it should return true if the string is the same when reversed, false otherwise.	fn is_palindrome(s: String) -> bool { let reversed: String = s.chars().rev().collect(); s eq reversed }
Write a function named count_digits that takes an integer as input and returns the count of digits in that integer.	fn count_digits(n: i32) -> u32 { n.to_string().len() as u32 }
Given a string containing digits, write a function named sum_digits that returns the sum of all digits in the string.	fn sum_digits(s: String) -> i32 { s.chars().filter_map(|c| c.to_digit(10)).sum::<i32>() }
Obtain the common elements in two lists of integers.	fn common_elements(a: Vec<i32>, b: Vec<i32>) -> Vec<i32> { let mut common: Vec<i32> = Vec::new(); for i in a { if b.contains(&i) { common.push(i); } } common }
Calculate the sum of squares of all integers in a list from 1 to n.	fn sum_of_squares(n: i32) -> i32 { let mut sum: i32 = 0; for i in 1..=n { sum += i * i; } sum }
Implement a function that takes an integer n and returns its factorial.	fn factorial(n: i32) -> i32 { let mut result: i32 = 1; for i in 1..=n { result *= i; } result }
Extract the middle element of a list of integers.	fn middle_element(lst: Vec<i32>) -> i32 { let mid = lst.len() / 2; lst[mid] }
Write a function that concatenates two strings.	fn concatenate_strings(a: String, b: String) -> String { a + &b }
Write a function 'sum_of_squares' that takes two integers 'a' and 'b' as input and returns the sum of the squares of 'a' and 'b'.	fn sum_of_squares(a: i32, b: i32) -> i32 { a.pow(2) + b.pow(2) }
Implement a function 'count_chars' that takes a string 's' as input and returns the number of characters in the string that are vowels.	fn count_chars(s: &str) -> usize { let mut count = 0; let vowels: &str = "aeiouAEIOU"; for c in s.chars() { if vowels.contains(c) { count += 1; } } count }
You are given a list of integers and you need to write a function 'count_even_numbers' that returns the count of even numbers in the list.	fn count_even_numbers(list: &[i32]) -> usize { let mut count = 0; for &num in list { if num % 2 == 0 { count += 1; } } count }
Write a function 'max_and_min' that takes a list of integers as input and returns the maximum and minimum values in the list.	fn max_and_min(list: &[i32]) -> (i32, i32) { let max = *list.iter().max().unwrap(); let min = *list.iter().min().unwrap(); (max, min) }
Implement a function 'palindrome_check' that takes a string 's' as input and returns true if the string is a palindrome, false otherwise.	fn palindrome_check(s: &str) -> bool { let reversed: String = s.chars().rev().collect(); s eq &reversed }
Given a 2D list of integers, find the maximum sum path from the top-left corner to the bottom-right corner. The path can only move either down or right at any point in time.	fn generate_permutations(s: &str) -> Vec<String> { if s.len() == 1 { return vec![s.to_string()]; } let mut result = Vec::new(); for (i, c) in s.chars().enumerate() { let remaining = &s[..i] + &s[i+1..]; for p in generate_permutations(remaining) { result.push(format!("{}{}", c, p)); } } result }
Design a data structure to store a list of integers and implement the following operations: add an integer to the list, remove the last added integer from the list, and return the product of all the integers in the list.	fn max_sum_path(grid: &Vec<Vec<i32>>) -> i32 { let mut dp = vec![vec![0; grid[0].len()]; grid.len()]; dp[0][0] = grid[0][0]; for i in 1..grid.len() { dp[i][0] = dp[i-1][0] + grid[i][0]; } for j in 1..grid[0].len() { dp[0][j] = dp[0][j-1] + grid[0][j]; } for i in 1..grid.len() { for j in 1..grid[0].len() { dp[i][j] = std::cmp::max(dp[i-1][j], dp[i][j-1]) + grid[i][j]; } } dp[grid.len()-1][grid[0].…
Write a function to check whether a given string is a palindrome or not.	struct ProductList { list: Vec<i32>, } impl ProductList { fn new() -> Self { ProductList { list: Vec::new() } } fn add(&mut self, num: i32) { self.list.push(num); } fn remove_last(&mut self) { self.list.pop(); } fn product(&self) -> i32 { self.list.iter().fold(1, |acc, &num| acc * num) } }
Create a function that takes a list of integers and returns the maximum absolute difference between any two elements in the list.	fn is_palindrome(s: &str) -> bool { let s = s.to_lowercase(); let chars: Vec<char> = s.chars().filter(|c| c.is_alphanumeric()).collect(); let mut i = 0; let mut j = chars.len() - 1; while i < j { if chars[i] != chars[j] { return false; } i += 1; j -= 1; } true }
Write a function that takes in a list of floats and returns the average of all numbers in the list.	fn average_list mut list: Vec<f64>) -> f64 { let sum: f64 = list.iter().sum(); let average: f64 = sum / list.len() as f64; average }
Write a function that takes in a string as input and returns the string with all uppercase letters converted to lowercase.	fn lowercase_string(s: String) -> String { s.to_lowercase() }
Write a function that takes a list of strings as input and returns the longest string in the list.	fn longest_string(mut list: Vec<String>) -> String { let mut longest: String = "".to_string(); for s in list { if s.len() > longest.len() { longest = s; } } longest }
Write a function that takes in a list of integers and returns a list of all prime numbers in the list.	fn prime_numbers(list: Vec<i32>) -> Vec<i32> { let mut prime_numbers: Vec<i32> = vec![]; for num in list { let mut is_prime: bool = true; if num <= 1 { continue; } for i in 2..=(num as f64).sqrt() as i32 { if num % i == 0 { is_prime = false; break; } } if is_prime { prime_numbers.push(num); } } prime_numbers }
Write a function that takes a list of dictionary objects as input and returns the dictionary object with the highest value for the key 'score'.	fn highest_score(mut list: Vec<std::collections::HashMap<String, i32>>) -> std::collections::HashMap<String, i32> { let mut highest_score: i32 = i32::MIN; let mut highest_dict: std::collections::HashMap<String, i32> = std::collections::HashMap::new(); for dict in list { if let Some(score) = dict.get("score") { if score > &highest_score { highest_score = *score; highest_dict = dict; } } } highest_…
Write a function that takes two strings as input and returns True if both strings have the same characters, False otherwise.	fn same_characters(s1: &str, s2: &str) -> bool { let v1: Vec<char> = s1.chars().collect(); let v2: Vec<char> = s2.chars().collect(); v1.sort(); v2.sort(); v1 == v2 }
Write a function that takes a list of integers and returns the count of prime numbers.	fn count_primes(numbers: Vec<i32>) -> i32 { let mut count = 0; for num in numbers { if is_prime(num) { count += 1; } } count } fn is_prime(n: i32) -> bool { if n <= 1 { return false; } let mut i = 2; while i * i <= n { if n % i == 0 { return false; } i += 1; } true }
Create a function that takes an integer as input and returns the factorial of the number.	fn factorial(n: i32) -> i32 { if n == 0 { 1 } else { n * factorial(n - 1) } }
Write a function that takes a list of strings as input and returns the string with the maximum length.	fn max_length_string(strings: Vec<&str>) -> &str { strings.iter().max_by_key(|s| s.len()).unwrap() }
Write a function that takes a string as input and returns the string with each word capitalized.	fn capitalize_words(s: &str) -> String { s.split_whitespace() .map(|word| word.to_uppercase()) .collect::<Vec<String>>() .join(" ") }
Count the number of words in a given string.	fn count_words(s: &str) -> i32 { let mut count = 0; let mut prev_char = ' '; for c in s.chars() { if c == ' ' && prev_char != ' ' { count += 1; } prev_char = c; } if !s.is_empty() { count += 1; } count }
Write a Rust function to determine if a given number is a prime number or not.	fn is_prime(n: i32) -> bool { if n <= 1 { return false; } if n == 2 { return true; } if n % 2 == 0 { return false; } let mut i = 3; while i * i <= n { if n % i == 0 { return false; } i += 2; } true }
Create a function to calculate the average of a list of integers.	fn average(ints: Vec<i32>) -> f64 { let sum: i32 = ints.iter().sum(); let average = sum as f64 / ints.len() as f64; average }
Write a function that takes a string as an input and returns the string in reverse order.	fn reverse_string(s: &str) -> String { let mut reversed: String = "".to_string(); for c in s.chars().rev() { reversed.push(c); } reversed }
Write a function to check if a given string is palindrome or not.	fn is_palindrome(s: &str) -> bool { let s = s.to_lowercase(); let reversed: String = s.chars().rev().collect(); s == reversed }
Create a function that takes a vector of numbers as input and returns a new vector that has all the numbers doubled. For example, if the input vector is [1, 2, 3, 4], the output should be [2, 4, 6, 8].	fn double_numbers(numbers: Vec<i32>) -> Vec<i32> { let mut doubled_numbers: Vec<i32> = Vec::new(); for number in numbers { doubled_numbers.push(number * 2); } doubled_numbers }
Write a function that takes a string as an input and returns the string with all the characters in reverse order. For example, if the input string is "Hello", the output should be "olleH".	fn reverse_string(input_string: String) -> String { input_string.chars().rev().collect() }
Create a function that takes a vector of strings as input and returns a new vector that has all the strings sorted in alphabetical order. For example, if the input vector is ["dog", "cat", "elephant"], the output should be ["cat", "dog", "elephant"].	fn sort_strings(strings: Vec<String>) -> Vec<String> { let mut sorted_strings: Vec<String> = strings; sorted_strings.sort(); sorted_strings }
Implement a function that takes a vector of integers as input and returns the average of all the elements in the vector. For example, if the input vector is [1, 2, 3, 4], the output should be 2.5.	fn calculate_average(numbers: Vec<i32>) -> f64 { let sum: i32 = numbers.iter().sum(); let average: f64 = sum as f64 / numbers.len() as f64; average }
Write a function that takes a vector of booleans as input and returns true if all the elements in the vector are true, false otherwise. For example, if the input vector is [true, true, true], the output should be true, and if the input vector is [true, false, true], the output should be false.	fn all_true(booleans: Vec<bool>) -> bool { booleans.iter().all(|x| *x) }
Write a function called count_positive_numbers that takes a list of i32 numbers as input and returns the count of positive numbers in the list.	fn count_positive_numbers(numbers: Vec<i32>) -> i32 { let mut count = 0; for &num in numbers.iter() { if num > 0 { count += 1; } } count }
Develop a Rust program to find the maximum number in a given list of i32 numbers.	fn find_max_number(numbers: Vec<i32>) -> i32 { let mut max = i32::MIN; for &num in numbers.iter() { if num > max { max = num; } } max }
Write a Rust function that takes a string as input and returns the string with all vowels removed.	fn remove_vowels(s: String) -> String { let mut new_string = String::new(); for c in s.chars() { if !"aeiouAEIOU".contains(c) { new_string.push(c); } } new_string }
Write a Rust function that takes a list of i32 numbers as input and returns the count of numbers that are divisible by 3.	fn count_numbers_divisible_by_3(numbers: Vec<i32>) -> i32 { let mut count = 0; for &num in numbers.iter() { if num % 3 == 0 { count += 1; } } count }
Develop a Rust program to find the sum of all prime numbers in a given list of i32 numbers.	fn is_prime(n: i32) -> bool { if n <= 1 { return false; } let mut i = 2; while i * i <= n { if n % i == 0 { return false; } i += 1; } true } fn sum_of_primes(numbers: Vec<i32>) -> i32 { let mut sum = 0; for &num in numbers.iter() { if is_prime(num) { sum += num; } } sum }
Write a Rust function that takes a dictionary of strings as keys and integers as values and returns the string key with the highest corresponding value.	fn get_key_with_highest_value(dict: std::collections::HashMap<String, i32>) -> String { let mut max_val = std::i32::MIN; let mut max_key = String::new(); for (key, val) in dict { if val > &max_val { max_val = *val; max_key = key.clone(); } } max_key }
Write a Rust function that takes a string as input and returns the string with all vowels removed.	fn remove_vowels(input_str: String) -> String { let vowels = "aeiouAEIOU"; let mut output_str = String::new(); for ch in input_str.chars() { if !vowels.contains(ch) { output_str.push(ch); } } output_str }
Write a Rust function that takes a list of strings as input and returns the longest string in the list.	fn get_longest_string(list: Vec<String>) -> String { let mut longest_str = String::new(); for str in list { if str.len() > longest_str.len() { longest_str = str.clone(); } } longest_str }
Write a Rust function that takes a list of integers as input and returns a list of integers where each element is the square of the corresponding element in the input list.	fn square_elements(list: Vec<i32>) -> Vec<i32> { let mut result = Vec::new(); for elem in list { result.push(elem * elem); } result }
Write a Rust function that takes two strings as input and returns true if the strings are anagrams of each other, false otherwise.	fn are_anagrams(str1: String, str2: String) -> bool { let mut str1_chars: Vec<char> = str1.chars().collect(); let mut str2_chars: Vec<char> = str2.chars().collect(); str1_chars.sort(); str2_chars.sort(); str1_chars == str2_chars }
Write a function that takes a vector of integers as input and returns a vector of all the even numbers in the input vector.	fn get_even_numbers(vec: Vec<i32>) -> Vec<i32> { let mut even_numbers = Vec::new(); for num in vec { if num % 2 == 0 { even_numbers.push(num); } } even_numbers }
Write a function to count the occurrences of a specific character in a given string.	fn count_char_occurrences(s: String, c: char) -> i32 { let mut count = 0; for ch in s.chars() { if ch == c { count += 1; } } count }
Write a function that takes a vector of strings as input and returns the count of strings that start with a vowel (a, e, i, o, u).	fn count_strings_starting_with_vowel(vec: Vec<String>) -> i32 { let mut count = 0; let vowels = vec!['a', 'e', 'i', 'o', 'u']; for s in vec { let first_ch = s.chars().next().unwrap_or_default(); if vowels.contains(&first_ch.to_ascii_lowercase()) { count += 1; } } count }
Write a function that takes a vector of integers as input and returns the sum of all the prime numbers in the vector.	fn sum_of_primes(vec: Vec<i32>) -> i32 { let mut sum = 0; fn is_prime(n: i32) -> bool { if n <= 1 { return false; } let mut i = 2; while i * i <= n { if n % i == 0 { return false; } i += 1; } true } for num in vec { if is_prime(num) { sum += num; } } sum }
Write a function that takes a vector of vectors of integers as input and returns the maximum value in the 2D vector.	fn max_value_in_2d_vec(vec: Vec<Vec<i32>>) -> i32 { let mut max_value = i32::MIN; for v in vec { for num in v { if num > max_value { max_value = num; } } } max_value }
Write a function that takes a string as an input and returns true if the string starts with a vowel, and false otherwise. The function should be case-insensitive. Input: string, Output: bool.	fn starts_with_vowel(s: String) -> bool { let vowels = vec!['a', 'e', 'i', 'o', 'u', 'A', 'E', 'I', 'O', 'U']; let first_char = s.chars().next(); vowels.contains(&first_char.unwrap_or.setDefault(' ')); }
Given an array of integers, write a function that returns the index of the maximum element. If there are multiple maximum elements, return the index of the first occurrence. Input: array of integers, Output: index as integer.	fn max_index(arr: Vec<i32>) -> i32 { let max_val = *arr.iter().max().unwrap(); arr.iter().position(|&x| x == max_val).unwrap() as i32 }
Implement a function that takes two strings as input and returns true if they are anagrams of each other, and false otherwise. Input: two strings, Output: bool.	fn are_anagrams(s1: String, s2: String) -> bool { let mut chars1: Vec<char> = s1.to_lowercase().chars().collect(); let mut chars2: Vec<char> = s2.to_lowercase().chars().collect(); chars1.sort(); chars2.sort(); chars1 == chars2 }
Write a function that takes a vector of integers as input and returns the sum of all the numbers that are divisible by 3. Input: vector of integers, Output: integer.	fn sum_divisible_by_3(arr: Vec<i32>) -> i32 { arr.iter().filter(|&&x| x % 3 == 0).sum() }
Given a string, write a function that returns the string with all the vowels removed. Input: string, Output: string.	fn remove_vowels(s: String) -> String { let vowels = "aeiouAEIOU"; let mut res = String::new(); for c in s.chars() { if !vowels.contains(c) { res.push(c); } } res }
Write a function that takes in a string parameter and returns the string with all vowels removed. The function should ignore case sensitivity. Name: remove_vowels, Inputs: s (string), Outputs: s_without_vowels (string).	fn remove_vowels(s: String) -> String { let mut s_without_vowels = String::new(); for c in s.to_lowercase().chars() { if !(c == 'a' || c == 'e' || c == 'i' || c == 'o' || c == 'u') { s_without_vowels.push(c); } } s_without_vowels }
Write a function that takes in two string parameters and returns True if the strings are identical, ignoring case sensitivity.	fn are_strings_identical(s1: String, s2: String) -> bool { s1.to_lowercase() == s2.to_lowercase() }
Write a function that takes in a positive integer and determines whether the number has exactly three divisors. The function should return True if the number has exactly three divisors.	fn has_three_divisors(n: i32) -> bool { let mut count = 0; for i in 1..=n { if n % i == 0 { count += 1; } if count > 3 { return false; } } count == 3 }
Write a function that takes in two integer arrays and returns their intersection. The function should return an array containing all elements that are present in both arrays. Name: intersection, Inputs: arr1 (array of integers), arr2 (array of integers), Outputs: intersection_arr (array of integers).	fn intersection(arr1: Vec<i32>, arr2: Vec<i32>) -> Vec<i32> { let mut intersection_arr: Vec<i32> = Vec::new(); for elem in arr1 { if arr2.contains(&elem) { intersection_arr.push(elem); } } intersection_arr }
Write a function that takes in an integer array and returns theMedian of the array. The function should return the median value as a float. If the array has an even number of elements, the function should return the average of the two middle elements. Name: find_median, Inputs: arr (array of integers), Outputs: median (float).	fn find_median(arr: Vec<i32>) -> f64 { let mut arr: Vec<i32> = arr; arr.sort(); let n = arr.len(); if n % 2 == 0 { ((arr[n / 2 - 1] + arr[n / 2]) as f64) / 2.0 } else { arr[n / 2] as f64 } }
Write a Rust function that takes a string and a character as input, and returns the number of times the character appears in the string.	fn count_char_occurrences(s: &str, c: char) -> i32 { let mut count = 0; for char in s.chars() { if char == c { count += 1; } } count }
Create a Rust function that takes a list of integers as input and returns the list in descending order.	fn sort_descending(lst: Vec<i32>) -> Vec<i32> { let mut sorted_list: Vec<i32> = lst; sorted_list.sort_unstable(); sorted_list.reverse(); sorted_list }
Write a Rust function that takes two lists of integers as input and returns a new list that contains all elements from both lists.	fn merge_lists(lst1: Vec<i32>, lst2: Vec<i32>) -> Vec<i32> { let mut merged_list: Vec<i32> = lst1; merged_list.extend_from_slice(&lst2); merged_list }
Create a Rust function that takes a string as input and returns the string with all vowels removed.	fn remove_vowels(s: &str) -> String { let mut result: String = "".to_string(); for c in s.chars() { if !["a", "e", "i", "o", "u"].contains(&c.to_ascii_lowercase().to_string().as_str()) { result.push(c); } } result }
Write a Rust function that takes a list of integers as input and returns a new list that contains only the even numbers from the original list.	fn filter_even_numbers(lst: Vec<i32>) -> Vec<i32> { let mut even_numbers: Vec<i32> = Vec::new(); for num in lst { if num % 2 == 0 { even_numbers.push(num); } } even_numbers }
Implement a function that takes an array of integers as input and returns the maximum subarray sum. The function should return the maximum sum of contiguous subarray within the given array.	fn max_subarray_sum(arr: &[i32]) -> i32 { let mut max_so_far = arr[0]; let mut max_ending_here = arr[0]; for i in 1..arr.len() { max_ending_here = max_ending_here + arr[i]; if max_ending_here < arr[i] { max_ending_here = arr[i]; } if max_so_far < max_ending_here { max_so_far = max_ending_here; } } max_so_far };
Write a function that takes a string as input and returns true if the string is a palindrome, false otherwise. The function should ignore case sensitivity and non-alphanumeric characters.	fn is_palindrome(s: &str) -> bool { let s = s.to_lowercase(); let s = s.chars().filter(|c| c.is_alphanumeric()).collect::<String>(); let mut i = 0; let mut j = s.len() - 1; while i < j { if s.chars().nth(i).unwrap() != s.chars().nth(j).unwrap() { return false; } i += 1; j -= 1; } true };
Implement a function that takes a integer as input and returns the reverse of the integer. The function should handle integer overflow and return 0 in such cases.	fn reverse_integer(x: i32) -> i32 { let mut result = 0; let mut x = x; while x != 0 { let pop = x % 10; x = x / 10; if result > i32::MAX / 10 || (result == i32::MAX / 10 && pop > i32::MAX % 10) { return 0; } if result < i32::MIN / 10 || (result == i32::MIN / 10 && pop < i32::MIN % 10) { return 0; } result = result * 10 + pop; } result };
Write a function that takes a vector of unique integers as input and returns the missing number in the sequence. The function should assume that the sequence starts from 1.	fn missing_number(nums: Vec<i32>) -> i32 { let mut total = ((nums.len() + 1) as i32) * ((nums.len() + 2) as i32) / 2; let sum: i32 = nums.iter().sum(); total - sum };
Implement a function that takes a string as input and returns the string with all occurrences of a substring removed. The function should take two strings as input: the original string and the substring to be removed.	fn remove_substring(s: &str, sub: &str) -> String { s.replace(sub, "") };
Write a function that takes in two strings and returns true if they are exactly the same, otherwise return false. The inputs are two strings.	fn compare_strings(s1: String, s2: String) -> bool { s1.eq(&s2) }
Write a function that takes in a vector of integers and returns the sum of all the numbers in the vector. The input is a vector of integers.	fn sum_vector(v: Vec<i32>) -> i32 { v.into_iter().sum() }
Write a function that takes in a string and returns the same string but in lowercase. The input is a string.	fn to_lowercase(s: String) -> String { s.to_lowercase() }
Write a function that takes in a vector of strings and returns the longest string in the vector. If there are multiple longest strings, return the first one. The input is a vector of strings.	fn longest_string(v: Vec<String>) -> String { v.into_iter().max_by_key(|s| s.len()).unwrap_or(String::new()) }
Write a function that takes in an integer and returns true if it is even, otherwise return false. The input is an integer.	fn is_even(n: i32) -> bool { n % 2 == 0 }
Given an integer, write a function that returns the sum of all its digits.	fn sum_digits(n: i32) -> i32 { let mut sum = 0; let mut temp = n; while temp != 0 { sum += temp % 10; temp /= 10; } sum }
Write a function that takes a list of strings as input and returns the longest string in the list.	fn longest_string(strings: Vec<String>) -> String { let mut longest = String::new(); for s in strings { if s.len() > longest.len() { longest = s.clone(); } } longest }
Implement a function that takes a list of integers and returns the count of the number of even numbers in the list.	fn count_evens(numbers: Vec<i32>) -> i32 { let mut count = 0; for num in numbers { if num % 2 == 0 { count += 1; } } count }
Write a function that takes a string as input and returns a new string where all vowels are converted to uppercase and consonants to lowercase.	fn modify_string(s: String) -> String { let mut modified_s = String::new(); for c in s.chars() { match c.to_ascii_lowercase() { 'a' | 'e' | 'i' | 'o' | 'u' => modified_s.push(c.to_ascii_uppercase()), _ => modified_s.push(c.to_ascii_lowercase()), } } modified_s }
Write a function that takes a list of integers and returns the second largest number in the list.	fn second_largest(numbers: Vec<i32>) -> i32 { let mut max = i32::MIN; let mut second_max = i32::MIN; for num in numbers { if num > max { second_max = max; max = num; } else if num > second_max && num != max { second_max = num; } } second_max }
Write a function that accepts a vector of integers as input and returns the number of occurrences of the smallest number in the vector.	fn count_smallest(nums: Vec<i32>) -> i32 { let min = *nums.iter().min().unwrap(); nums.into_iter().filter(|&&x| x == min).count() as i32 }
Design a function that takes a string as input and returns true if the string contains at least one lowercase letter, false otherwise.	fn contains_lowercase(s: &str) -> bool { s.chars().any(char::is_lowercase) }
Implement a function that accepts a vector of tuples, where each tuple contains a string and an integer, and returns a new vector with the tuples sorted in descending order based on the integer value.	fn sort_tuples(tuples: Vec<(String, i32)>) -> Vec<(String, i32)> { tuples.into_iter().collect::<Vec<_>>().sort_by_key(|&(_, val)| val).rev() }
Write a function to check whether the given string is a pangram, i.e., it contains all the 26 English alphabets at least once.	fn is_pangram(s: &str) -> bool { let mut chars = [false; 26]; for c in s.to_ascii_lowercase().chars().filter(|&&c| c.is_alphabetic()) { chars[(c as u8 - b'a') as usize] = true; } chars.iter().all(|&&b| b) }
Design a function that takes a vector of integers as input and returns the number of consecutive subsequences of length 3 that have a sum divisible by 3.	fn count_consecutive_subseqs(nums: Vec<i32>) -> i32 { let mut count = 0; for i in 0..nums.len() - 2 { if (nums[i] + nums[i + 1] + nums[i + 2]) % 3 == 0 { count += 1; } } count }
Write a function named count_vowels that takes a string as input and returns the count of vowels in the string.	fn count_vowels(s: &str) -> i32 { let mut count: i32 = 0; for c in s.chars() { match c.to_ascii_lowercase() { 'a' | 'e' | 'i' | 'o' | 'u' => count += 1, _ => (), } } count }
Write a function named longest_word that takes a string as input and returns the longest word in the string.	fn longest_word(s: &str) -> String { let mut max_len = 0; let mut longest_word = String::new(); for word in s.split_whitespace() { let len = word.len(); if len > max_len { max_len = len; longest_word = word.to_string(); } } longest_word }
Write a function named find_largest that takes a list of integers as input and returns the largest number in the list.	fn find_largest(nums: Vec<i32>) -> i32 { let mut max_num: i32 = nums[0]; for num in nums { if num > max_num { max_num = num; } } max_num }
Write a function named count_consonants that takes a string as input and returns the count of consonants in the string.	fn count_consonants(s: &str) -> i32 { let mut count: i32 = 0; for c in s.chars() { let lower = c.to_ascii_lowercase(); if lower.is_alphabetic() && !"aeiou".contains(lower) { count += 1; } } count }
Write a function named find_average that takes a list of integers as input and returns the average of the numbers in the list.	fn find_average(nums: Vec<i32>) -> f64 { let sum: i32 = nums.iter().sum(); let avg: f64 = sum as f64 / nums.len() as f64; avg }
Create a function that takes an integer n as input and returns the nth Fibonacci number. The Fibonacci sequence is a series of numbers where a number is the sum of the two preceding ones, usually starting with 0 and 1.	fn fibonacci(n: i32) -> i32 { if n <= 1 { return n; } else { return fibonacci(n - 1) + fibonacci(n - 2); } }
Create a function called reverse_string that takes a string as input and returns the reverse of the string.	fn reverse_string(s: &str) -> String { s.chars().rev().collect() }
Create a function called sum_of_digits that takes an integer as input and returns the sum of its digits.	fn sum_of_digits(n: i32) -> i32 { let mut sum = 0; let mut num = n; while num != 0 { sum += num % 10; num /= 10; } sum }
Create a function called count_vowels that takes a string as input and returns the count of vowels in the string. The function should be case-insensitive.	fn count_vowels(s: &str) -> i32 { let mut count = 0; for c in s.to_lowercase().chars() { match c { 'a' | 'e' | 'i' | 'o' | 'u' => count += 1, _ => {} } } count }
Create a function called count_words that takes a string as input and returns the count of words in the string. A word is considered as a sequence of characters separated by a space.	fn count_words(s: &str) -> i32 { let mut count = 1; for c in s.chars() { if c == ' ' { count += 1; } } count }
Write a Rust function to count the number of uppercase letters in a given string. The function takes a string as input and returns an integer.	fn count_uppercase_letters(s: &str) -> i32 { let count = s.chars().filter(|c| c.is_uppercase()).count() as i32; return count; }
Create a Rust function that takes a list of strings as input and returns the longest string in the list. If there are multiple longest strings, the function returns the first one it encounters.	fn find_longest_string(list: &[&str]) -> &str { let longest = list.iter().max_by_key(|&&s| s.len()).unwrap_or(&""); return longest; }
Write a Rust function that takes a list of integers as input and returns the product of all even numbers in the list. If there are no even numbers, the function returns 1.	fn product_even_numbers(list: &[i32]) -> i32 { let product = list.iter().filter(|&&x| x % 2 == 0).fold(1, |acc, &x| acc * x); return product; }
Create a Rust function that takes a string as input and returns the string with all digits removed. The function should preserve the original case of the characters.	fn remove_digits(s: &str) -> String { let result: String = s.chars().filter(|c| !c.is_digit(10)).collect(); return result; }
Write a Rust function that takes a list of integers as input and returns the number of pairs of adjacent elements that have a difference of exactly 1. The function should return an integer.	fn count_adjacent_pairs(list: &[i32]) -> i32 { let count = list.windows(2).filter(|&[a, b]| (a - b).abs() == 1).count() as i32; return count; }
Write a function calculate_total_cost to calculate the total cost of items in a list, given a list of item prices and a sales tax rate.	fn calculate_total_cost(prices: Vec<f64>, tax_rate: f64) -> f64 { let total_cost: f64 = prices.iter().sum::<f64>(); total_cost * (1.0 + tax_rate) }
Write a function count_vowels to count the number of vowels in a string.	fn count_vowels(s: &str) -> i32 { let mut vowels: i32 = 0; for c in s.to_lowercase().chars() { match c { 'a' | 'e' | 'i' | 'o' | 'u' => vowels += 1, _ => (), } } vowels }
Write a function to find the maximum product of a pair of numbers in a list of integers.	fn max_product_pair(numbers: Vec<i32>) -> i32 { let mut max1 = i32::MIN; let mut max2 = i32::MIN; let mut min1 = i32::MAX; let mut min2 = i32::MAX; for &num in numbers.iter() { if num > max1 { max2 = max1; max1 = num; } else if num > max2 { max2 = num; } if num < min1 { min2 = min1; min1 = num; } else if num < min2 { min2 = num; } } i32::max(max1 * max2, min1 * min2) }
Write a function replace_spaces to replace all occurrences of a space in a string with a specified replacement string.	fn replace_spaces(s: &str, replacement: &str) -> String { s.replace(" ", replacement) }
Write a function find_max_key to find the key with the maximum value in a hashmap.	fn find_max_key(hashmap: &std::collections::HashMap<String, i32>) -> Option<&String> { hashmap.iter().max_by_key(|&(_, v)| v).map(|(k, _)| k) }
Write a Rust function to convert a given temperature in Celsius to Fahrenheit. The function takes a single float number as input and returns the converted temperature as a float number.	fn celsius_to_fahrenheit(celsius: f64) -> f64 { (celsius * 9.0 / 5.0) + 32.0 }
Write a Rust function that takes a list of integers as input and returns the count of all prime numbers in the list. The function takes a vector of integers as input and returns an integer.	fn count_primes(numbers: Vec<i32>) -> i32 { let mut count = 0; for num in numbers { let mut is_prime = true; if num <= 1 { continue; } for i in 2..num { if num % i == 0 { is_prime = false; break; } } if is_prime { count += 1; } } count }
Write a Rust function to check if a given string has a valid credit card number format. The function takes a string as input and returns a boolean indicating whether the credit card number format is valid or not.	fn is_credit_card(s: &str) -> bool { let cards = vec!["visa", "mastercard", "americanexpress"]; for card in cards { if s.contains(card) { let digits: Vec<char> = s.chars().filter(|c| c.is_digit(10)).collect(); if digits.len() == 16 { return true; } } } false }
Write a Rust function to find the maximum value in a given list of integers. The function takes a vector of integers as input and returns an integer.	fn max_value(numbers: Vec<i32>) -> i32 { *numbers.iter().max().unwrap() }
Write a Rust function to count the occurrences of a given word in a list of strings. The function takes a string and a vector of strings as input and returns the count of occurrences as an integer.	fn count_word(word: &str, sentences: Vec<&str>) -> i32 { let mut count = 0; for sentence in sentences { let words: Vec<&str> = sentence.split_whitespace().collect(); for w in words { if w == word { count += 1; } } } count }
Write a function that takes in a vector of integers and returns the count of numbers greater than 5.	fn count_greater_than_five(numbers: Vec<i32>) -> i32 { let mut count = 0; for number in numbers { if number > 5 { count += 1; } } count }
Create a class named 'Circle' with attributes radius. The class should have an area method that returns the area of the circle and a circumference method that returns the circumference of the circle.	struct Circle { radius: f64, } impl Circle { fn area(&self) -> f64 { 3.14159 * (self.radius * self.radius) } fn circumference(&self) -> f64 { 2.0 * 3.14159 * self.radius } }
Given a vector of characters, write a function that returns a new vector that contains only the alphabetic characters from the original vector.	fn get_alphabetic_characters(characters: Vec<char>) -> Vec<char> { characters.into_iter().filter(|c| c.is_alphabetic()).collect() }
Write a function that takes in a vector of vectors of integers and returns the sum of all the elements in the inner vectors.	fn sum_of_inner_vectors(vectors: Vec<Vec<i32>>) -> i32 { let mut sum = 0; for inner_vector in vectors { for element in inner_vector { sum += element; } } sum }
Write a function that takes in a vector of strings and returns a new vector that contains only the strings that start with an uppercase letter.	fn get_strings_starting_uppercase(strings: Vec<String>) -> Vec<String> { strings.into_iter().filter(|s| s.chars().next().unwrap().is_uppercase()).collect() }
Write a Rust function that takes a string as input and returns the string with all occurrences of a specified character removed.	fn remove_char(input_str: String, char: char) -> String { let mut output_str = String::new(); for c in input_str.chars() { if c != char { output_str.push(c); } } output_str }
Write a Rust function that takes a vector of integers as input and returns the count of all even numbers in the vector.	fn count_even_numbers(numbers: Vec<i32>) -> i32 { let mut count = 0; for num in numbers { if num % 2 == 0 { count += 1; } } count }
Write a Rust function that takes a string as input and returns true if the string is a palindrome, false otherwise.	fn is_palindrome(input_str: String) -> bool { let input_chars: Vec<char> = input_str.chars().collect(); let mut left = 0; let mut right = input_chars.len() - 1; while left < right { if input_chars[left] != input_chars[right] { return false; } left += 1; right -= 1; } true }
Write a Rust function that takes a vector of strings as input and returns a new vector with all strings sorted in descending order.	fn sort_strings_in_descending_order(strings: Vec<String>) -> Vec<String> { let mut strings_clone = strings.clone(); strings_clone.sort_unstable_by(|a, b| b.cmp(a)); strings_clone }
Write a Rust function that takes a string as input and returns the string with all occurrences of a specified substring removed.	fn remove_substring(input_str: String, substring: String) -> String { input_str.replace(&substring, "") }
Write a Rust function that takes a vector of characters as an input and returns a new vector that contains only the characters that are uppercase.	fn filter_uppercase(chars: Vec<char>) -> Vec<char> { let mut uppercase_chars: Vec<char> = Vec::new(); for c in chars { if c.is_uppercase() { uppercase_chars.push(c); } } uppercase_chars }
Create a Rust function that takes a string as an input and returns a vector of strings, where each string is a word from the input string, sorted in alphabetical order.	fn sort_words(s: String) -> Vec<String> { let mut words: Vec<String> = s.split_whitespace().map(|s| s.to_string()).collect(); words.sort(); words }
Write a Rust function that takes a vector of tuples, where each tuple contains two integers, as an input and returns the sum of all the first elements of the tuples.	fn sum_first_elements(v: Vec<(i32, i32)>) -> i32 { let mut sum: i32 = 0; for (x, _) in v { sum += x; } sum }
Implement a Rust function that takes a vector of integers as an input and returns a new vector that contains the square of each number in the input vector.	fn square_numbers(numbers: Vec<i32>) -> Vec<i32> { numbers.into_iter().map(|x| x * x).collect() }
Create a Rust function that takes a string as an input and returns a string that contains only the digits from the input string.	fn filter_digits(s: String) -> String { let mut digits: String = String::new(); for c in s.chars() { if c.is_digit(10) { digits.push(c); } } digits }
Create a function that takes a list of strings as input and returns the count of all strings that start with 'a'.	fn count_starting_with_a(vec: Vec<String>) -> i32 { let mut count = 0; for s in vec { if s.starts_with("a") { count += 1; } } count }
Write a function that takes a vector of integers as input and returns the count of all numbers that are divisible by both 2 and 3.	fn count_divisible_by_2_and_3(vec: Vec<i32>) -> i32 { let mut count = 0; for num in vec { if num % 2 == 0 && num % 3 == 0 { count += 1; } } count }
Create a function that takes two integers as input and returns their greatest common divisor (GCD).	fn gcd(a: i32, b: i32) -> i32 { if b == 0 { a } else { gcd(b, a % b) } }
Write a function that takes a vector of characters as input and returns the count of all vowels in the vector.	fn count_vowels(vec: Vec<char>) -> i32 { let mut count = 0; for c in vec { match c { 'a' | 'e' | 'i' | 'o' | 'u' => count += 1, _ => (), } } count }
Create a function that takes a vector of floats as input and returns the average of all numbers in the vector.	fn average(vec: Vec<f64>) -> f64 { if vec.is_empty() { 0.0 } else { let sum: f64 = vec.iter().sum::<f64>(); sum / vec.len() as f64 } }
Write a function that takes in a list of strings and returns the string with the longest length.	fn longest_string(input_list: Vec<String>) -> String { let mut max_len = 0; let mut longest_str = String::new(); for str in input_list { if str.len() > max_len { max_len = str.len(); longest_str = str; } } longest_str }
Create a Rust function that takes a list of integers as input and returns the count of all even numbers in the list.	fn count_even_numbers(input_list: Vec<i32>) -> i32 { let mut count = 0; for num in input_list { if num % 2 == 0 { count += 1; } } count }
Write a Rust function that takes a dictionary of student names as keys and their corresponding grades as values, and returns the student with the highest grade.	fn highest_grade(input_dict: std::collections::HashMap<String, i32>) -> String { let mut max_grade = 0; let mut highest_student = String::new(); for (student, grade) in input_dict { if grade > max_grade { max_grade = grade; highest_student = student; } } highest_student }
Design a Rust function that accepts a list of integers as input and returns the product of all the elements in the list.	fn product_of_elements(input_list: Vec<i32>) -> i32 { let mut product = 1; for num in input_list { product *= num; } product }
Write a Rust function that takes a list of characters as input and returns the count of all vowels in the list.	fn count_vowels(input_list: Vec<char>) -> i32 { let mut count = 0; for char in input_list { match char { 'a' | 'e' | 'i' | 'o' | 'u' | 'A' | 'E' | 'I' | 'O' | 'U' => count += 1, _ => (), } } count }
Define a function that takes a list of integers as input and returns the count of elements that are even numbers.	fn count_even_numbers(numbers: Vec<i32>) -> i32 { let mut count = 0; for &num in &numbers { if num % 2 == 0 { count += 1; } } count }
Write a function that takes a list of characters as input and returns a string that includes all characters.	fn concatenate_chars(chars: Vec<char>) -> String { chars.into_iter().collect() }
Implement a function that takes a list of strings as input and returns a list of strings that are longer than 5 characters.	fn filter_strings(long_strings: Vec<String>) -> Vec<String> { long_strings.into_iter().filter(|s| s.len() > 5).collect() }
Write a function that takes a list of integers as input and returns the maximum and minimum values in the list.	fn find_max_min(numbers: Vec<i32>) -> (i32, i32) { let min = *numbers.iter().min().unwrap(); let max = *numbers.iter().max().unwrap(); (min, max) }
Implement a function that takes a dictionary as input and returns a new dictionary with the keys converted to uppercase.	fn uppercase_keys(mut dictionary: std::collections::HashMap<String, i32>) -> std::collections::HashMap<String, i32> { dictionary.iter_mut().for_each(|(key, _)| *key = key.to_uppercase()); dictionary }
Write a function that takes a list of strings as an input and returns a new list that contains all the strings in uppercase.	fn upperCaseStrings(mut input_list: Vec<String>) -> Vec<String> { for i in 0..input_list.len() { input_list[i] = input_list[i].to_uppercase(); } input_list }
Write a function that takes three integers as input and returns the maximum value among them.	fn findMax(a: i32, b: i32, c: i32) -> i32 { if a >= b && a >= c { return a; } else if b >= a && b >= c { return b; } else { return c; } }
Write a function that takes a list of integers as an input and returns the sum of all the even numbers in the list.	fn sumEvenNumbers(input_list: Vec<i32>) -> i32 { let mut sum = 0; for num in input_list { if num % 2 == 0 { sum += num; } } sum }
Write a function that takes a list of characters as an input and returns a new list that contains the characters in reverse order.	fn reverseCharacters(input_list: Vec<char>) -> Vec<char> { input_list.into_iter().rev().collect() }
Write a function that takes a string as an input and returns the string with all vowels removed.	fn removeVowels(input_string: String) -> String { input_string.chars().filter(|c| ! "aeiouAEIOU".contains(c)).collect() }
Create a Rust function that takes a string as input and returns the number of vowels in the string.	fn count_vowels(s: &str) -> i32 { let mut count = 0; for c in s.to_lowercase().chars() { match c { 'a' | 'e' | 'i' | 'o' | 'u' => count += 1, _ => {} } } count }
Write a Rust function that takes a list of strings as input and returns the longest string in the list. If there are multiple longest strings, return the first one.	fn longest_string(strings: &Vec<String>) -> &String { let mut max_length = 0; let mut longest_string = ""; for s in strings { if s.len() > max_length { max_length = s.len(); longest_string = s; } } longest_string }
Create a Rust function that takes three integers as input and returns the maximum of the three numbers.	fn max_of_three(a: i32, b: i32, c: i32) -> i32 { let max_ab = if a > b { a } else { b }; if max_ab > c { max_ab } else { c } }
Write a Rust function that takes a list of integers as input and returns a new list containing the squares of all the numbers in the original list.	fn square_numbers(numbers: &Vec<i32>) -> Vec<i32> { let mut squared_numbers = Vec::new(); for &n in numbers { squared_numbers.push(n * n); } squared_numbers }
Create a Rust function that takes a string as input and returns true if the string is a palindrome, false otherwise.	fn is_palindrome(s: &str) -> bool { let s = s.to_lowercase(); let chars: Vec<char> = s.chars().collect(); let reversed_chars: Vec<char> = chars.clone().into_iter().rev().collect(); chars == reversed_chars }
Create a function 'contains_vowel' that takes a string ('s') as input and returns 'True' if the string contains at least one vowel, 'False' otherwise.	fn contains_vowel(s: String) -> bool { let vowels = "aeiouAEIOU"; for c in s.chars() { if vowels.contains(c) { return true; } } false }
Write a function 'count_even' that takes a list of integers ('numbers') as input and returns the count of even numbers in the list.	fn count_even(numbers: Vec<i32>) -> i32 { let mut count = 0; for &num in numbers.iter() { if num % 2 == 0 { count += 1; } } count }
Create a function 'is_anagram' that takes two strings ('s1' and 's2') as input and returns 'True' if the strings are anagrams of each other, 'False' otherwise.	fn is_anagram(s1: String, s2: String) -> bool { let mut chars1: Vec<char> = s1.chars().collect(); let mut chars2: Vec<char> = s2.chars().collect(); chars1.sort(); chars2.sort(); chars1 == chars2 }
Write a function 'find_max' that takes a list of integers ('numbers') as input and returns the maximum element in the list.	fn find_max(numbers: Vec<i32>) -> i32 { *numbers.iter().max().unwrap() }
Create a function 'remove_duplicates' that takes a list of integers ('numbers') as input and returns the list with duplicate elements removed.	fn remove_duplicates(numbers: Vec<i32>) -> Vec<i32> { numbers.into_iter().collect::<std::collections::HashSet<_>>().into_iter().collect() }
Write a function that takes a tuple of integers and returns the sum of all the integers.	fn sum_tuple(t: (i32, i32, i32)) -> i32 { let (a, b, c) = t; a + b + c }
Create a function that takes a vector of integers and returns a new vector containing only the even numbers.	fn filter_even_numbers(nums: Vec<i32>) -> Vec<i32> { nums.into_iter().filter(|&&x| x % 2 == 0).collect() }
Write a function that takes a string and returns the string with all vowels removed.	fn remove_vowels(s: String) -> String { s.chars().filter(|c| ! vec!['a', 'e', 'i', 'o', 'u'].contains(&c.to_lowercase().next().unwrap())).collect() }
Create a function that takes a vector of strings and returns a new vector containing the lengths of all the strings.	fn string_lengths(strings: Vec<String>) -> Vec<usize> { strings.into_iter().map(|s| s.len()).collect() }
Write a function that takes two vectors of integers and returns a new vector containing the elements that are common to both vectors.	fn common_elements(a: Vec<i32>, b: Vec<i32>) -> Vec<i32> { a.into_iter().filter(|&&x| b.contains(&x)).collect() }
Write a Rust function to count the number of uppercase letters in a given string, where the function takes a string as input and returns the count of uppercase letters as an integer.	fn count_uppercase_letters(s: &str) -> i32 { let mut count = 0; for c in s.chars() { if c.is_uppercase() { count += 1; } } count }
Write a Rust function to find the longest word in a given string, where the function takes a string as input and returns the longest word as a string.	fn find_longest_word(s: &str) -> &str { let words: Vec<&str> = s.split_whitespace().collect(); let mut longest_word = ""; for word in words { if word.len() > longest_word.len() { longest_word = word; } } longest_word }
Create a Rust function to calculate the sum of all odd numbers in a given array of integers, where the function takes an array of integers as input and returns the sum as an integer.	fn sum_odd_numbers(arr: &[i32]) -> i32 { let mut sum = 0; for &num in arr { if num % 2 != 0 { sum += num; } } sum }
Write a Rust function to reverse a given string, where the function takes a string as input and returns the reversed string.	fn reverse_string(s: &str) -> String { s.chars().rev().collect() }
Design a Rust function to find the maximum difference between two elements in a given array of integers, where the function takes an array of integers as input and returns the maximum difference as an integer.	fn max_difference(arr: &[i32]) -> i32 { let mut max_diff = i32::MIN; let mut min_element = arr[0]; for &num in arr { if num - min_element > max_diff { max_diff = num - min_element; } if num < min_element { min_element = num; } } max_diff }
Write a function `find_largest_number` that takes a list of integers as input and returns the largest number in the list. This function should also return the index of the largest number in the list.	fn find_largest_number(integers_list: Vec<i32>) -> (i32, usize) { let mut largest_number = integers_list[0]; let mut index = 0; for (i, &value) in integers_list.iter().enumerate() { if value > largest_number { largest_number = value; index = i; } } (largest_number, index) }
Implement a function `check_palindrome` that takes a string as input and returns true if the string is a palindrome and false otherwise.	fn check_palindrome(string: String) -> bool { let reversed_string: String = string.chars().rev().collect(); string == reversed_string }
Write a function `calculate_average` that takes a list of floats as input and returns the average of the numbers in the list.	fn calculate_average(floats_list: Vec<f64>) -> f64 { let sum: f64 = floats_list.iter().sum(); sum / floats_list.len() as f64 }
Implement a function `encode_string` that takes a string as input and returns a new string where each character is shifted by a certain number of positions down the alphabet. The shift should be specified as an additional input to the function.	fn encode_string(string: String, shift: i32) -> String { let mut encoded_string = String::new(); for c in string.chars() { let char_code = c as i32; let shifted_char_code = (char_code + shift) % 256; let shifted_char = char::from_u32(shifted_char_code as u32).unwrap(); encoded_string.push(shifted_char); } encoded_string }
Write a function `count_vowels` that takes a string as input and returns the count of vowels in the string.	fn count_vowels(string: String) -> i32 { let mut vowel_count = 0; for c in string.to_lowercase().chars() { match c { 'a' | 'e' | 'i' | 'o' | 'u' => vowel_count += 1, _ => (), } } vowel_count }
Write a function called is_anagram that accepts two strings as input and returns true if they are anagrams of each other, and false otherwise.	fn is_anagram(s1: &str, s2: &str) -> bool { let mut s1_chars: Vec<char> = s1.to_lowercase().chars().collect(); let mut s2_chars: Vec<char> = s2.to_lowercase().chars().collect(); s1_chars.sort(); s2_chars.sort(); s1_chars == s2_chars }
Create a function called get_largest_number that takes a list of integers as input and returns the largest number in the list.	fn get_largest_number(numbers: Vec<i32>) -> i32 { *numbers.iter().max().unwrap() }
Write a function called calculate_total_cost that takes a list of prices of items and a tax rate as input, and returns the total cost after applying the tax rate.	fn calculate_total_cost(prices: Vec<f64>, tax_rate: f64) -> f64 { let total_cost: f64 = prices.iter().sum::<f64>(); total_cost * (1.0 + tax_rate) }
Create a function called get_unique_characters that takes a string as input and returns a string containing unique characters in the original string.	fn get_unique_characters(s: &str) -> String { let mut unique_chars: Vec<char> = s.chars().collect(); unique_chars.dedup(); unique_chars.into_iter().collect() }
Write a function called get_average_grade that takes a list of grades as input and returns the average grade.	fn get_average_grade(grades: Vec<f64>) -> f64 { let total_grade: f64 = grades.iter().sum::<f64>(); total_grade / grades.len() as f64 }
Implement a function to find the first duplicate in a given list of integers. Return the first duplicate element.	fn average(lst: Vec<i32>) -> f64 { if lst.is_empty() { return -1.0; } let sum: i32 = lst.iter().sum(); sum as f64 / lst.len() as f64 }
Write a Rust function to calculate the average of a list of integers. The function should handle division by zero errors.	fn contains_all_vowels(s: String) -> bool { let vowels: Vec<char> = "aeiou".chars().collect(); for vowel in vowels { if !s.to_lowercase().contains(vowel) { return false; } } true }
Implement a Rust function that takes in a string as input and returns true if it contains all vowels (at least one occurrence of 'a', 'e', 'i', 'o', 'u').	fn max_difference(lst: Vec<i32>) -> i32 { if lst.len() < 2 { return 0; } let min: i32 = *lst.iter().min().unwrap(); let max: i32 = *lst.iter().max().unwrap(); max - min }
Create a function called timeConversion that takes a 12-hour time in the format "hh:mm:ssAM/PM" as a string and returns the time in 24-hour format as a string.	``` fn timeConversion(s: &str) -> String { let parts: Vec<_> = s.split(':').collect(); let (hours, minutes, seconds) = (parts[0], parts[1], &parts[2][..2]); let pm = parts[2].ends_with("PM"); let hour: i32 = hours.parse().unwrap(); let new_hour = if pm { if hour == 12 { "12".to_string() } else { (hour + 12).to_string() } } else { if hour == 12 { "00".to_string() } else { hour.to_string() } }; for…
Write a function called gridGame that takes a 2D array of integers as input, and returns the maximum path sum from top-left to bottom-right.	``` fn gridGame(grid: &Vec<Vec<i32>>) -> i32 { let mut dp = vec![vec![0; grid[0].len()]; grid.len()]; dp[0][0] = grid[0][0]; for i in 1..grid.len() { dp[i][0] = dp[i - 1][0] + grid[i][0]; } for j in 1..grid[0].len() { dp[0][j] = dp[0][j - 1] + grid[0][j]; } for i in 1..grid.len() { for j in 1..grid[0].len() { dp[i][j] = std::cmp::max(dp[i - 1][j], dp[i][j - 1]) + grid[i][j]; } } dp[grid.len() - 1…
Create a function called closeBracket that takes a string of brackets as input and returns true if the brackets are balanced and closed, false otherwise.	``` fn closeBracket(s: &str) -> bool { let mut stack = Vec::new(); for c in s.chars() { match c { '(' => stack.push(')'), '[' => stack.push(']'), '{' => stack.push('}'), _ => { if stack.pop() != Some(c) { return false; } } } } stack.is_empty() } ```
Write a function called filterList that takes a list of integers and a filter number as input, and returns a new list that contains only the numbers that are greater than the filter number.	``` fn filterList(list: Vec<i32>, filter_num: i32) -> Vec<i32> { list.into_iter().filter(|x| x > &&filter_num).collect() } ```
Develop a Rust program that takes a 2D list of integers as input and returns the average of all the numbers in the list.	``` fn average2dList(list: &Vec<Vec<i32>>) -> f64 { let mut sum: i32 = 0; let mut count: i32 = 0; for inner in list { for num in inner { sum += num; count += 1; } } sum as f64 / count as f64 } ```
Write a function that takes a string as input and returns the string with all digits removed. The function should be case-insensitive, i.e., it should remove both single and multi-digit numbers from the string.	fn remove_digits(s: &str) -> String { s.chars().filter(|c| !c.is_digit(10)).collect() }
Create a function that takes a vector of integers as input and returns the maximum difference between two elements in the vector. The function should return 0 if the vector is empty or contains only one element.	fn max_difference(v: Vec<i32>) -> i32 { if v.len() < 2 { return 0; } let max = v.iter().max().unwrap(); let min = v.iter().min().unwrap(); max - min }
Write a function that takes a string as input and returns the longest word in the string. If there are multiple longest words, the function should return the first one it encounters.	fn longest_word(s: &str) -> &str { let mut max_len = 0; let mut longest_word = ""; for word in s.split_whitespace() { if word.len() > max_len { max_len = word.len(); longest_word = word; } } longest_word }
Create a function that takes two vectors of integers as input and returns a new vector containing the elements that are common to both input vectors.	fn common_elements(v1: Vec<i32>, v2: Vec<i32>) -> Vec<i32> { let mut common: Vec<i32> = Vec::new(); for elem in v1 { if v2.contains(&elem) { common.push(elem); } } common }
Write a function that takes a string as input and returns the count of uppercase letters in the string.	fn count_uppercase(s: &str) -> i32 { s.chars().filter(|c| c.is_uppercase()).count() as i32 }
Write a function that takes a string as input and returns the string with all vowels removed.	fn remove_vowels(s: String) -> String { let mut result = String::new(); for c in s.chars() { if !matches!(c, 'a' | 'e' | 'i' | 'o' | 'u' | 'A' | 'E' | 'I' | 'O' | 'U') { result.push(c); } } result }
Write a function that takes an integer as input and returns true if the number is a perfect square, and false otherwise.	fn is_perfect_square(n: i32) -> bool { let sqrt = (n as f64).sqrt() as i32; sqrt * sqrt == n }
Write a function that takes a list of strings as input and returns the longest string in the list.	fn longest_string(strs: Vec<String>) -> String { strs.into_iter().max_by_key(|s| s.len()).unwrap_or_default() }
Write a function that takes two integers as input and returns their greatest common divisor (GCD).	fn gcd(a: i32, b: i32) -> i32 { if b == 0 { a } else { gcd(b, a % b) } }
Write a function that takes a list of integers as input and returns the count of all odd numbers in the list.	fn count_odd(nums: Vec<i32>) -> i32 { nums.into_iter().filter(|&&x| x % 2 != 0).count() as i32 }
Write a function to calculate the sum of the squares of the first n natural numbers where n is a positive integer. The input will be an integer and the output will be an integer as well. The function should be able to handle inputs of data type i32.	fn sum_of_squares(n: i32) -> i32 { let mut sum = 0; for i in 1..=n { sum += i * i; } sum }
Write a class called "Triangle" with attributes "base" and "height" and methods "area" and "hypotenuse". The input will be two floats for base and height and the output will be two floats as well. The function should be able to handle inputs of data type f64.	struct Triangle { base: f64, height: f64, } impl Triangle { fn new(base: f64, height: f64) -> Triangle { Triangle { base, height } } fn area(&self) -> f64 { 0.5 * self.base * self.height } fn hypotenuse(&self) -> f64 { (self.base * self.base + self.height * self.height).sqrt() } }
Write a function that takes in a vector of integers and returns the count of occurrence of the maximum number. The input will be a vector of integers and the output will be an integer. The function should be able to handle inputs of data type Vec<i32>.	fn count_max_occurrences(numbers: Vec<i32>) -> i32 { let max_number = *numbers.iter().max().unwrap(); numbers.iter().filter(|&&n| n == max_number).count() as i32 }
Write a function that takes in a string and returns the count of vowels in the string. The input will be a string and the output will be an integer. The function should be able to handle inputs of data type &str.	fn count_vowels(s: &str) -> i32 { let mut count = 0; for c in s.to_lowercase().chars() { match c { 'a' | 'e' | 'i' | 'o' | 'u' => count += 1, _ => {} } } count }
Write a function that takes in a list of strings and returns the longest string in the list. The input will be a vector of strings and the output will be a string. The function should be able to handle inputs of data type Vec<String>.	fn longest_string(strings: Vec<String>) -> String { *strings.iter().max_by_key(|s| s.len()).unwrap().clone() }
Create a function `calculate_area` that takes the length and width of a rectangle as input and returns its area.	fn calculate_area(length: f64, width: f64) -> f64 { length * width }
Write a function `count_evens` that takes a vector of integers as input and returns the count of even numbers in the vector.	fn count_evens(numbers: Vec<i32>) -> i32 { numbers.into_iter().filter(|x| x % 2 == 0).count() as i32 }
Implement a function `checkmiddlewarescore` that takes a student's middle ware score as input and returns "Pass" if the score is 50 or more, and "Fail" otherwise.	fn checkmiddlewarescore(score: i32) -> &'static str { if score >= 50 { "Pass" } else { "Fail" } }
Create a function `find_longest_string` that takes a vector of strings as input and returns the longest string in the vector.	fn find_longest_string(strings: Vec<String>) -> String { strings.into_iter().max_by_key(|s| s.len()).unwrap_or_default() }
Write a function `is_perfectsquare` that takes an integer as input and returns true if it's a perfect square, and false otherwise.	fn is_perfectsquare(n: i32) -> bool { let root = (n as f64).sqrt() as i32; root * root == n }
Write a Rust function named max_value to find the maximum value in a given list of integers.	fn max_value(mut list: Vec<i32>) -> i32 { let mut max_val = list[0]; for val in list { if val > max_val { max_val = val; } } max_val }
Write a Rust function named sum_of_odd to calculate the sum of all odd numbers in a given list of integers.	fn sum_of_odd(mut list: Vec<i32>) -> i32 { let mut sum = 0; for val in list { if val % 2 != 0 { sum += val; } } sum }
Create a Rust function named count_even that counts the number of even numbers in a given list of integers.	fn count_even(mut list: Vec<i32>) -> i32 { let mut count = 0; for val in list { if val % 2 == 0 { count += 1; } } count }
Develop a Rust function named reverse_string to reverse a given string.	fn reverse_string(s: String) -> String { s.chars().rev().collect() }
Write a Rust function named difference to find the difference between the sum of the squares of the first n natural numbers and the square of their sum.	fn difference(n: i32) -> i32 { let sum_of_squares: i32 = (1..=n).map(|x| x * x).sum(); let square_of_sum: i32 = (1..=n).sum::<i32>().pow(2); square_of_sum - sum_of_squares }
Write a Rust function named maximum_value that takes two integers as input and returns the maximum of the two.	fn maximum_value(a: i32, b: i32) -> i32 { if a > b { a } else { b } }
Design a Rust function called factorial that takes an integer as input and returns its factorial.	fn factorial(n: i32) -> i32 { let mut result = 1; for i in 1..=n { result *= i; } result }
Write a Rust function named count_vowels that takes a string as input and returns the count of vowels in the string.	fn count_vowels(s: &str) -> i32 { let mut count = 0; for c in s.to_lowercase().chars() { match c { 'a' | 'e' | 'i' | 'o' | 'u' => count += 1, _ => (), } } count }
Write a Rust function named sortDescending that takes a vector of integers as input, sorts it in descending order, and returns the sorted vector.	fn sortDescendingmut vec: Vec<i32>) -> Vec<i32> { vec.sort_unstable_by(|a, b| b.cmp(a)); vec }
Design a Rust function called check_palindrome that takes a string as input and returns true if the string is a palindrome, false otherwise.	fn check_palindrome(s: &str) -> bool { let reversed: String = s.chars().rev().collect(); s.to_lowercase() == reversed.to_lowercase() }
Write a function to calculate the average of all the elements in a list of integers. The function should return the average as a float. The input will be a list of integers, and the output will be a float.	fn average(list: Vec<i32>) -> f64 { let sum: i32 = list.into_iter().sum(); (sum as f64) / (list.len() as f64) }
Write a function to count the number of uppercase letters in a given string. The function should return the count as an integer. The input will be a string, and the output will be an integer.	fn count_uppercase(s: &str) -> i32 { s.matches(char::is_uppercase).count() as i32 }
Write a function to find all the common elements in two lists of integers. The function should return a new list with the common elements. The inputs will be two lists of integers, and the output will be a list of integers.	fn common_elements(list1: Vec<i32>, list2: Vec<i32>) -> Vec<i32> { list1.into_iter().filter(|x| list2.contains(x)).collect() }
Write a function to check if a given list of integers is sorted in ascending order. The function should return true if the list is sorted, false otherwise. The input will be a list of integers, and the output will be a boolean.	fn is_sorted(list: Vec<i32>) -> bool { list.into_iter().zip(list.iter().skip(1)).all(|(a, b)| a <= b) }
Write a function to count the number of vowels in a given string. The function should return the count as an integer. The input will be a string, and the output will be an integer.	fn count_vowels(s: &str) -> i32 { s.matches(|c: char| "aeiouAEIOU".contains(c)).count() as i32 }
You need to create a function that takes a vector of strings as input and returns a new vector containing the strings that start with a vowel.	fn starts_with_vowel(input: Vec<String>) -> Vec<String> { let vowels: Vec<char> = "aeiouAEIOU".chars().collect(); input.into_iter().filter(|s| vowels.contains(&s.chars().next().unwrap())).collect() }
Write a function that takes a vector of integers as input and returns a new vector containing the squares of the input integers.	fn square_numbers(input: Vec<i32>) -> Vec<i32> { input.into_iter().map(|x| x * x).collect() }
You need to create a function that takes a vector of tuples as input, where each tuple contains a string and an integer, and returns a new vector containing only the strings from the input tuples.	fn extract_strings(input: Vec<(String, i32)>) -> Vec<String> { input.into_iter().map(|(s, _)| s).collect() }
Write a function that takes a vector of integers as input and returns the count of elements that are less than 10.	fn count_less_than_10(input: Vec<i32>) -> i32 { input.into_iter().filter(|&&x| x < 10).count() as i32 }
You need to create a function that takes a vector of characters as input and returns a new vector containing the characters in reverse order.	fn reverse_chars(input: Vec<char>) -> Vec<char> { input.into_iter().rev().collect() }
Calculate the sum of all digits in a given integer.	fn sum_digits(n: i32) -> i32 { let mut sum = 0; let mut n = n; while n != 0 { sum += n % 10; n /= 10; } sum }
Check if a given string starts with a vowel.	fn reverse_string(s: &str) -> String { s.chars().rev().collect() }
Find the middle element of a given array.	fn starts_with_vowel(s: &str) -> bool { let vowels: &'static str = "aeiouAEIOU"; s.chars().next().map(|c| vowels.contains(c)).unwrap_or(false) }
Remove trailing zeros from a given integer.	fn find_middle_element(arr: &[i32]) -> Option<i32> { let n = arr.len(); if n % 2 == 0 { None } else { Some(arr[n / 2]) } }
Create a Rust function that takes a string as input and returns the string with all consonants removed. Consider both uppercase and lowercase consonants.	fn remove_consonants(s: String) -> String { let mut result = String::new(); for c in s.chars() { if !((c >= 'a' && c <= 'z') || (c >= 'A' && c <= 'Z')) || "aeiouAEIOU".contains(c) { result.push(c); } } result }
Write a Rust function that asks the user for their favorite movie title and then prints out a message that says 'My favorite movie is {title}.'.	use std::io; fn favorite_movie() { let mut title = String::new(); println!("Enter your favorite movie title:"); io::stdin().read_line(&mut title).expect("Failed to read line"); println!("My favorite movie is {}.", title.trim()); }
Write a Rust function that takes a list of strings as input and returns the concatenation of all the strings in the list.	fn concatenate_strings(list: Vec<String>) -> String { let mut result = String::new(); for s in list { result.push_str(&s); } result }
Create a Rust function that takes a number as input and returns its square value.	fn square_number(n: i32) -> i32 { n * n }
Write a Rust function that takes a list of characters as input and returns the list with all uppercase characters changed to lowercase and all lowercase characters changed to uppercase.	fn swap_case(list: Vec<char>) -> Vec<char> { list.into_iter().map(|c| { if c.is_lowercase() { c.to_uppercase().chars().next().unwrap() } else if c.is_uppercase() { c.to_lowercase().chars().next().unwrap() } else { c } }).collect() }
Write a function that takes two strings as input, concatenates them, and then returns the result.	fn concatenate_strings(str1: &str, str2: &str) -> String { format!("{}{}", str1, str2) }
You are given a list of floats, write a function that calculates the average of the list.	fn calculate_average(numbers: Vec<f64>) -> f64 { let sum: f64 = numbers.iter().sum(); sum / numbers.len() as f64 }
Create a function that takes a string as input and returns the string in uppercase.	fn to_uppercase(s: &str) -> String { s.to_uppercase() }
Write a function that takes a list of integers and returns the count of odd numbers in the list.	fn count_odd_numbers(numbers: Vec<i32>) -> i32 { let count: i32 = numbers.into_iter().filter(|&&x| x % 2 != 0).count() as i32; count }
You are given a list of strings, write a function that returns the longest string in the list.	fn longest_string(strings: Vec<&str>) -> &str { strings.into_iter().max_by_key(|s| s.len()).unwrap() }
Write a function that takes in a vector of tuples where each tuple contains a string and an integer. The function should return the string with the highest associated integer value. If there are multiple strings with the same highest integer value, return the first one.	fn maxStringValue(vec: Vec<(String, i32)>) -> String { let mut max = i32::MIN; let mut result = String::new(); for (_, value) in vec.iter() { if *value > max { max = *value; result = vec.iter().find(|&&(ref s, &v)| v == max).unwrap().0.clone(); } } result }
Create a function that takes a vector of i32 as input and returns the count of all prime numbers in the vector.	fn count_prime_numbers(vec: Vec<i32>) -> i32 { fn is_prime(n: i32) -> bool { if n <= 1 { return false; } let mut i = 2; while i * i <= n { if n % i == 0 { return false; } i += 1; } true } let mut count = 0; for &num in vec.iter() { if is_prime(num) { count += 1; } } count }
Define a function that takes a vector of characters as input and returns the count of vowels in the vector.	fn count_vowels(vec: Vec<char>) -> i32 { let mut count = 0; for &c in vec.iter() { match c { 'a' | 'e' | 'i' | 'o' | 'u' | 'A' | 'E' | 'I' | 'O' | 'U' => count += 1, _ => (), } } count }
Write a function that takes a vector of f64 as input and returns the average of all numbers in the vector. If the vector is empty, return 0.0.	fn average(vec: Vec<f64>) -> f64 { if vec.is_empty() { return 0.0; } let sum: f64 = vec.iter().sum(); sum / vec.len() as f64 }
Create a function that takes a vector of strings as input and returns a new vector containing only the strings that start with a vowel.	fn filter_vowels(vec: Vec<String>) -> Vec<String> { let mut result = Vec::new(); for s in vec.iter() { let c = s.chars().next().unwrap(); match c { 'a' | 'e' | 'i' | 'o' | 'u' | 'A' | 'E' | 'I' | 'O' | 'U' => result.push(s.clone()), _ => (), } } result }
Write a Rust function that takes two lists of integers as input and returns a new list containing all the elements that are present in the first list but not in the second list. The returned list should not contain duplicate values.	fn difference_of_lists(list1: Vec<i32>, list2: Vec<i32>) -> Vec<i32> { let mut result: Vec<i32> = Vec::new(); for num in list1 { if !list2.contains(&num) && !result.contains(&num) { result.push(num); } } result }
Create a Rust function that takes a list of integers as input and returns the list sorted in descending order.	fn sort_descending(list: Vec<i32>) -> Vec<i32> { let mut result = list.clone(); result.sort_unstable_by(|a, b| b.cmp(a)); result }
Write a Rust function that takes a list of strings as input and returns the longest string in the list.	fn longest_string(list: Vec<String>) -> String { let mut longest = String::new(); for str in list { if str.len() > longest.len() { longest = str; } } longest }
Create a Rust function that takes two integers as input and returns their least common multiple (LCM).	fn gcd(a: i32, b: i32) -> i32 { if b == 0 { a } else { gcd(b, a % b) } } fn lcm(num1: i32, num2: i32) -> i32 { let g = gcd(num1, num2); (num1 * num2).abs() / g }
Write a Rust function that takes a list of integers and returns the number of times the number 5 appears in the list.	fn count_fives(list: Vec<i32>) -> i32 { let mut count = 0; for num in list { if num == 5 { count += 1; } } count }
Write a function that takes a string as input and returns the string with all consonants removed.	fn remove_consonants(s: &str) -> String { let mut result = String::new(); for c in s.chars() { if !((c >= 'a' && c <= 'z') && (c != 'a' && c != 'e' && c != 'i' && c != 'o' && c != 'u')) { result.push(c); } } result };
Write a function that takes a list of integers as input and returns a new list that contains the square of each number.	fn square_numbers(v: &Vec<i32>) -> Vec<i32> { v.iter().map(|x| x * x).collect() };
Create a Rust function that takes an integer as input and returns the count of the number of digits in the integer.	fn count_digits(n: i32) -> i32 { n.abs().to_string().chars().count() as i32 };
Write a function that takes a string as input and returns True if the string contains at least one uppercase letter, and False otherwise.	fn contains_uppercase(s: &str) -> bool { s.chars().any(|c| c.is_uppercase()) };
Write a function that takes a list of integers as input and returns the average of the numbers in the list.	fn average_numbers(v: &Vec<f64>) -> f64 { v.iter().sum::<f64>() / v.len() as f64 };
Create a function that takes in a string as input and returns the string with all vowels removed.	fn remove_vowels(s: &str) -> String { let mut new_string = String::new(); for c in s.chars() { match c { 'a' | 'e' | 'i' | 'o' | 'u' | 'A' | 'E' | 'I' | 'O' | 'U' => continue, _ => new_string.push(c), } } new_string }
Write a function that takes a list of numbers as input and returns the count of prime numbers in the list.	fn count_primes(numbers: Vec<i32>) -> i32 { fn is_prime(n: i32) -> bool { if n <= 1 { return false; } let mut i = 2; while i * i <= n { if n % i == 0 { return false; } i += 1; } true } let mut count = 0; for &num in numbers.iter() { if is_prime(num) { count += 1; } } count }
Create a function that takes in a list of tuples containing student's name and grade as input and returns the student with the highest grade.	fn highest_grade(students: Vec<(String, i32)>) -> Option<(String, i32)> { students.into_iter().max_by_key(|(_, grade)| *grade) }
Write a function that takes in a string as input and returns the string with all characters reversed.	fn reverse_string(s: &str) -> String { s.chars().rev().collect() }
Create a function that takes in a list of numbers as input and returns the list with all negative numbers removed.	fn remove_negatives(numbers: Vec<i32>) -> Vec<i32> { numbers.into_iter().filter(|&x| x >= 0).collect() }
Write a function that takes a list of integers and returns the count of numbers that are greater than the previous number in the list.	fn count_greater(numbers: Vec<i32>) -> i32 { let mut count = 0; for i in 1..numbers.len() { if numbers[i] > numbers[i - 1] { count += 1; } } count }
Create a function that takes a string and returns the count of words that start with a vowel.	fn count_vowel_words(sentence: String) -> i32 { let mut count = 0; let vowels: Vec<char> = vec!['a', 'e', 'i', 'o', 'u']; let words: Vec<&str> = sentence.split_whitespace().collect(); for word in words { let first_char = word.chars().next().unwrap_or(' '); if vowels.contains(&first_char.to_ascii_lowercase()) { count += 1; } } count }
Write a function that takes a list of integers and returns the sum of all even numbers in the list.	fn sum_even(numbers: Vec<i32>) -> i32 { let mut sum = 0; for num in numbers { if num % 2 == 0 { sum += num; } } sum }
Create a function that takes a string and returns the reversed string.	fn reverse_string(str: String) -> String { str.chars().rev().collect() }
Write a function that takes a list of integers and returns the count of numbers that are perfect squares.	fn count_squares(numbers: Vec<i32>) -> i32 { let mut count = 0; for num in numbers { let sqrt = (num as f64).sqrt() as i32; if sqrt * sqrt == num { count += 1; } } count }
Write a Rust function named `find_largest_number` that takes an array of integers as input and returns the largest number in the array.	fn find_largest_number(mut arr: [i32; 5]) -> i32 { let mut max = arr[0]; for i in 1..arr.len() { if arr[i] > max { max = arr[i]; } } max }
Write a Rust function named `count_vowels` that takes a string as input and returns the count of vowels in the string.	fn count_vowels(s: &str) -> i32 { let mut count = 0; for c in s.to_lowercase().chars() { match c { 'a' | 'e' | 'i' | 'o' | 'u' => count += 1, _ => (), } } count }
Write a Rust function named `remove_first_last` that takes a string as input and returns the string with the first and last characters removed.	fn remove_first_last(s: &str) -> String { let mut chars = s.chars(); let mut res = String::new(); chars.next(); for c in chars { if let Some(last) = c.chars().last() { if *last != c { res.push(c); } } else { res.push(c); } } res }
Write a Rust function named `countitrust` that takes two arrays of integers as input and returns the count of elements that are common to both arrays.	fn countitrust(arr1: [i32; 5], arr2: [i32; 5]) -> i32 { let mut count = 0; for i in arr1 { for j in arr2 { if i == j { count += 1; } } } count }
Write a Rust function named `reverse_string` that takes a string as input and returns the reversed string.	fn reverse_string(s: &str) -> String { s.chars().rev().collect() }
Define a function called `find_largest` that takes a list of integers as input and returns the largest number in the list.	fn find_largest(mut numbers: Vec<i32>) -> i32 { let mut largest = numbers[0]; for num in numbers { if num > largest { largest = num; } } largest }
Create a function that takes a dictionary as an input, where the keys are book titles and the values are their respective authors. The function should return a string stating the book with the longest title.	use std::collections::HashMap; fn longest_title(books: HashMap<String, String>) -> String { let mut longest_title = ""; for (title, _) in books { if title.len() > longest_title.len() { longest_title = title.as_str(); } } longest_title.to_string() }
Write a function that takes two lists of integers as input and returns a new list containing the sum of corresponding elements from both lists.	fn sum_corresponding_elements(list1: Vec<i32>, list2: Vec<i32>) -> Vec<i32> { let mut result = vec![]; for i in 0..list1.len() { result.push(list1[i] + list2[i]); } result }
You are given an array of floating-point numbers. Write a function that returns the average of the array elements.	fn average_array(numbers: Vec<f64>) -> f64 { let sum: f64 = numbers.iter().sum(); sum / numbers.len() as f64 }
Create a function that takes an integer as input and returns a string stating whether the number is odd or even.	fn check_odd_even(n: i32) -> String { if n % 2 == 0 { "The number is even.".to_string() } else { "The number is odd.".to_string() } }
Write a function that takes a list of integers as input and returns the product of all the prime numbers in the list.	fn product_of_primes(numbers: Vec<i32>) -> i32 { let mut product: i32 = 1; for &num in numbers.iter() { let mut is_prime = true; if num <= 1 { is_prime = false; } else { for i in 2..=((num as f64).sqrt() as i32) { if num % i == 0 { is_prime = false; break; } } } if is_prime { product *= num; } } product };
Create a function that takes a list of strings and returns the string with the minimum length.	fn shortest_string(strings: Vec<String>) -> Option<String> { strings.into_iter().min_by_key(|s| s.len()) };
Write a function that takes a list of integers as input and returns True if each integer is at least twice as large as the previous integer, False otherwise.	fn is_increasing_doubled(numbers: Vec<i32>) -> bool { let mut prev_num: i32 = i32::MIN; for &num in numbers.iter() { if prev_num != i32::MIN && num < prev_num * 2 { return false; } prev_num = num; } true };
Write a function that takes a list of integers as input and returns the difference between the maximum and minimum numbers in the list.	fn max_min_difference(numbers: Vec<i32>) -> i32 { let max_num = *numbers.iter().max().unwrap(); let min_num = *numbers.iter().min().unwrap(); max_num - min_num };
Create a function that takes a list of strings and returns the count of strings that contain at least one digit.	fn count_strings_with_digit(strings: Vec<String>) -> i32 { let mut count: i32 = 0; for string in strings { for char in string.chars() { if char.is_digit(10) { count += 1; break; } } } count };
Write a Rust function to calculate and return the factorial of a given number.	fn factorial(n: i32) -> i32 { let mut result = 1; for i in 1..=n { result *= i; } result }
You are given a string as an input, write a Rust function to return the number of vowels in the string.	fn count_vowels(s: String) -> i32 { let mut count = 0; let s = s.to_lowercase(); for c in s.chars() { match c { 'a' | 'e' | 'i' | 'o' | 'u' => count += 1, _ => (), } } count }
Write a Rust function that takes a vector of integers as input and returns the second smallest number in the vector.	fn second_smallest(vec: Vec<i32>) -> i32 { let mut vec = vec; vec.sort_unstable(); let min = vec[0]; let mut second_min = i32::max_value(); for &x in vec.iter() { if x > min && x < second_min { second_min = x; } } second_min }
Write a Rust function that takes a string as input and returns the string with all the characters in uppercase.	fn to_uppercase(s: String) -> String { s.to_uppercase() }
You are given a vector of tuples containing a name and an age as an input, write a Rust function to return the names of all individuals who are above 18 years old.	fn above_eighteen(vec: Vec<(String, i32)>) -> Vec<String> { let mut result = Vec::new(); for &(ref name, age) in vec.iter() { if age > 18 { result.push(name.clone()); } } result }
Create a function to convert Celsius to Fahrenheit.	fn celsius_to_fahrenheit(temperature: f64) -> f64 { let fahrenheit = temperature * 9.0 / 5.0 + 32.0; fahrenheit }
Write a function that takes in an integer and returns the square of the integer.	fn square(number: i32) -> i32 { number * number }
Write a function that takes a string as input and counts the number of vowels in the string.	fn count_vowels(string: String) -> i32 { let mut count = 0; for char in string.to_lowercase().chars() { match char { 'a' | 'e' | 'i' | 'o' | 'u' => count += 1, _ => (), } } count }
Write a function that takes a string as input and checks if it is a palindrome.	fn fibonacci_sequence(number: i32) -> Vec<i32> { let mut sequence = vec![0, 1]; while sequence.last().unwrap() + sequence[sequence.len() - 2] <= number { sequence.push(sequence.last().unwrap() + sequence[sequence.len() - 2]) } sequence }
Implement a function that takes in a 2D vector of characters and returns the count of uppercase letters.	fn count_uppercase_letters(v: Vec<Vec<char>>) -> i32 { let mut count = 0; for inner in v { for c in inner { if c.is_uppercase() { count += 1; } } } count }
Develop a function that takes a 2D vector of integers as input and returns a new 2D vector with all the elements multiplied by 2.	fn multiply_elements(v: Vec<Vec<i32>>) -> Vec<Vec<i32>> { v.into_iter().map(|inner| inner.into_iter().map(|x| x * 2).collect()).collect() }
Implement a function that takes in a string and returns the string with all vowels removed.	fn remove_vowels(s: String) -> String { s.chars().filter(|c| !matches!(c, 'a' | 'e' | 'i' | 'o' | 'u' | 'A' | 'E' | 'I' | 'O' | 'U')).collect() }
Write a function that takes a vector of strings as input and returns the longest string in the vector.	fn longest_string(v: Vec<String>) -> String { v.into_iter().max_by_key(|s| s.len()).unwrap_or_default() }
Develop a function that takes in a vector of integers and returns the second largest number in the vector.	fn second_largest(v: Vec<i32>) -> i32 { let mut unique = v.into_iter().collect::<std::collections::HashSet<_>>(); unique.remove(&(*unique.iter().max().unwrap())); *unique.iter().max().unwrap() }
Write a function to count the number of duplicate characters in a given string.	fn count_duplicates(s: String) -> i32 { let mut count = 0; let mut chars: Vec<char> = s.chars().collect(); chars.sort_unstable(); let mut prev_char = chars[0]; let mut prev_count = 1; for char in chars[1..].iter() { if char == &prev_char { prev_count += 1; } else { if prev_count > 1 { count += prev_count - 1; } prev_char = *char; prev_count = 1; } } if prev_count > 1 { count += prev_count - 1; } …
Implement a Rust program that takes two integers as input and returns the value of x raised to the power y.	fn power(x: i32, y: i32) -> i32 { let mut result = 1; for _ in 0..y { result *= x; } result }
Write a Rust function that takes a string as input and returns the longest word in the string.	fn longest_word(s: String) -> String { let mut longest_word = ""; let words: Vec<&str> = s.split_whitespace().collect(); for word in words { if word.len() > longest_word.len() { longest_word = word; } } longest_word.to_string() }
Write a Rust function that takes an integer as input and returns the sum of its digits.	fn sum_digits(n: i32) -> i32 { let mut sum = 0; let mut temp = n; while temp > 0 { sum += temp % 10; temp /= 10; } sum }
Implement a Rust program that takes a list of integers as input and returns the second largest number in the list.	fn second_largest(mut nums: Vec<i32>) -> i32 { nums.sort_unstable(); let mut max = nums[nums.len() - 1]; let mut second_largest = i32::MIN; for num in nums { if num < max && num > second_largest { second_largest = num; } } second_largest }
Write a function that takes a vector of floating-point numbers and returns the largest number in the vector.	fn largest_number(numbers: Vec<f64>) -> f64 { let mut largest = numbers[0]; for &number in numbers.iter() { if number > largest { largest = number; } } largest }
Design a function called `add_character` that takes a string and a character as inputs, and returns a new string where the character is added to the end of the original string.	fn add_character(s: String, c: char) -> String { let mut new_string = s.clone(); new_string.push(c); new_string }
Write a function that takes a vector of strings as input and returns a new vector with all the strings converted to uppercase.	fn to_uppercase(strings: Vec<String>) -> Vec<String> { strings.into_iter().map(|s| s.to_uppercase()).collect() }
Write a function that takes a vector of integers as input and returns a new vector with all the numbers multiplied by 2.	fn multiply_by_two(numbers: Vec<i32>) -> Vec<i32> { numbers.into_iter().map(|n| n * 2).collect() }
Design a function called `is_palindrome` that takes a string as input and returns true if the string is the same when reversed, and false otherwise.	fn is_palindrome(s: String) -> bool { let reversed: String = s.chars().rev().collect(); s eq reversed }
Write a function that takes an array of integers and returns the target sum cannot be obtained from the subarray.	fn sum_subarray(arr: Vec<i32>) -> i32 { // step-by-step solution }
Write a function that calculates the sum of all numbers in an array that are greater than a given target.	fn sum_greater_than_target(arr: Vec<i32>, target: i32) -> i32 { let mut sum = 0; for num in arr { if num > target { sum += num; } } sum }
Implement a queue using a linked list where the queue can enqueue and dequeue elements.	fn Queue { struct Node { data: i32, next: Option<Box<Node>>, } struct Queue { front: Option<Box<Node>>, rear: Option<Box<Node>>, } impl Queue { fn new() -> Queue { Queue { front: None, rear: None } } fn enqueue(&mut self, data: i32) { let node = Node { data, next: None }; match self.rear { None => { self.front = Some(Box::new(node)); self.rear = self.front.clone(); } _ => { self.rear.as_mut().unw…
Write a function that takes a string as input and returns the count of vowels in the string.	fn count_vowels(s: String) -> i32 { let mut count = 0; for c in s.to_lowercase().chars() { match c { 'a' | 'e' | 'i' | 'o' | 'u' => count += 1, _ => (), } } count }
Write a function that takes a 2D array of integers as input and returns the sum of all elements in the array.	fn sum_2d_array(arr: Vec<Vec<i32>>) -> i32 { let mut sum = 0; for row in arr { for num in row { sum += num; } } sum }
Write a function that takes a set of numbers and a target value as input, and returns all pairs of numbers that add up to the target value.	fn pairs_add_up_to_target(arr: Vec<i32>, target: i32) -> Vec<(i32, i32)> { let mut pairs = Vec::new(); for i in 0..arr.len() { for j in i + 1..arr.len() { if arr[i] + arr[j] == target { pairs.push((arr[i], arr[j])); } } } pairs }
Create a Rust function that accepts two integers as input and returns their product.	fn multiply(a: i32, b: i32) -> i32 { a * b }
Write a Rust function calculate_total_score that takes a vector of scores as input and returns the total score.	fn calculate_total_score(scores: Vec<(String, i32)>) -> i32 { let mut total_score = 0; for (_, score) in scores { total_score += score; } total_score }
Write a Rust function that takes a string as input and returns the string with all vowels removed.	fn remove_vowels(s: &str) -> String { let mut result = String::new(); for c in s.chars() { if !"aeiouAEIOU".contains(c) { result.push(c); } } result }
Implement a Rust function that takes a vector of integers as input and returns the count of even numbers in the vector.	fn count_even_numbers(numbers: Vec<i32>) -> i32 { let mut count = 0; for &num in numbers.iter() { if num % 2 == 0 { count += 1; } } count }
Write a Rust function that takes a vector of strings as input and returns the concatenated string.	fn concatenate_strings(strings: Vec<&str>) -> String { let mut result = String::new(); for &s in strings.iter() { result.push_str(s); } result }
Implement a Rust function find_smaller(a, b) that takes two integer arguments a and b, and returns the value that is strictly smaller than the other. In other words, it should return the minimum of the two input values. Name: find_smaller, Inputs: a, b, Outputs: smaller value, Data types: a - i32, b - i32, return - i32.	fn find_smaller(a: i32, b: i32) -> i32 { if a < b { a } else { b } }
Write a Rust function that takes a string as input and returns the string with all consonants removed. Name: remove_consonants, Inputs: s, Outputs: string without consonants, Data types: s - String, return - String.	fn remove_consonants(s: String) -> String { let mut result: String = String::new(); for c in s.to_lowercase().chars() { if "aeiou".contains(c) { result.push(c); } } result }
Given a list of integers, write a Rust function to find the maximum and minimum values in the list. Name: find_max_min, Inputs: list, Outputs: (maximum, minimum), Data types: list - Vec<i32>, return - (i32, i32).	fn find_max_min(list: Vec<i32>) -> (i32, i32) { let mut max: i32 = list[0]; let mut min: i32 = list[0]; for &num in list.iter() { if num > max { max = num; } else if num < min { min = num; } } (max, min) }
Write a Rust function that takes a list of strings as input and returns the concatenated string. Name: concatenate, Inputs: list, Outputs: concatenated string, Data types: list - Vec<String>, return - String.	fn concatenate(list: Vec<String>) -> String { let mut result: String = String::new(); for s in list { result.push_str(&s); } result }
Implement a Rust function count_zeros(list) that takes a list of integers as input and returns the count of zeros in the list. Name: count_zeros, Inputs: list, Outputs: count of zeros, Data types: list - Vec<i32>, return - i32.	fn count_zeros(list: Vec<i32>) -> i32 { let mut count: i32 = 0; for &num in list.iter() { if num == 0 { count += 1; } } count }
Write a function that takes a list of integers as input and returns the list with even numbers only.	fn filter_even(mut numbers: Vec<i32>) -> Vec<i32> { numbers.retain(|&x| x % 2 == 0); numbers }
Write a function that takes a list of strings as input and returns a new list with the strings concatenated.	fn concatenate_strings(strings: Vec<String>) -> String { strings.join("") }
Write a function that takes a list of characters as input and returns the count of the uppercase and lowercase letters.	fn count_case(chars: Vec<char>) -> (i32, i32) { let mut upper = 0; let mut lower = 0; for &c in chars.iter() { if c.is_uppercase() { upper += 1; } else if c.is_lowercase() { lower += 1; } } (upper, lower) }
Write a function that takes a list of Boolean values as input and returns a count of all the True values.	fn count_true(booleans: Vec<bool>) -> i32 { booleans.iter().filter(|&&x| x).count() as i32 }
Write a function that takes two integer values as input and returns their product.	fn multiply(a: i32, b: i32) -> i32 { a * b }
Write a function that takes in an integer array and returns true if the array contains exactly three elements with value 5, and false otherwise.	fn three_fives(arr: [i32]) -> bool { let mut count = 0; for elem in arr { if elem == 5 { count += 1; } } count == 3 }
Write a function that takes in a string and returns the string with all lowercase vowels removed.	fn remove_vowels(s: &str) -> String { let mut result = String::new(); for c in s.chars() { if !"aeiou".contains(c.to_lowercase().as_str()) { result.push(c); } } result }
Write a function that takes in an integer and returns true if the sum of its digits is 10, and false otherwise.	fn digit_sum_ten(n: i32) -> bool { let mut sum = 0; let mut temp = n; while temp > 0 { sum += temp % 10; temp /= 10; } sum == 10 }
Write a function that takes in a string and returns true if the string contains at least one uppercase letter, and false otherwise.	fn has_uppercase(s: &str) -> bool { for c in s.chars() { if c.is_uppercase() { return true; } } false }
Write a function that takes in an integer array and returns the sum of all elements in the array.	fn array_sum(arr: [i32]) -> i32 { let mut sum = 0; for elem in arr { sum += elem; } sum }
Write a function that takes in two integers representing the width and height of a rectangle and returns the area of the rectangle.	fn calculate_area(width: i32, height: i32) -> i32 { width * height }
Given a list of strings, return a new list containing the strings that have a length greater than 5.	fn filter_strings(strings: Vec<String>) -> Vec<String> { strings.into_iter().filter(|s| s.len() > 5).collect() }
Create a function that takes a list of floating-point numbers as input and returns the average value of the list.	fn calculate_average(numbers: Vec<f64>) -> f64 { let sum: f64 = numbers.iter().sum(); sum / numbers.len() as f64 }
You are given a list of characters, write a function that returns a new list containing the characters in lowercase.	fn to_lowercase(chars: Vec<char>) -> Vec<char> { chars.into_iter().map(|c| c.to_lowercase().next().unwrap()).collect() }
Write a function that takes in a list of integers and returns a new list containing the numbers that are multiples of 3.	fn multiples_of_three(numbers: Vec<i32>) -> Vec<i32> { numbers.into_iter().filter(|&n| n % 3 == 0).collect() }
Write a function that takes a string as input and returns true if the string has at least one uppercase letter, false otherwise.	fn has_uppercase(input: &str) -> bool { for c in input.chars() { if c.is_uppercase() { return true; } } false }
Create a function that takes a vector of strings as input and returns the string with the maximum length.	fn longest_string(vec: &Vec<String>) -> String { let mut max_len = 0; let mut max_str = String::new(); for s in vec { if s.len() > max_len { max_len = s.len(); max_str = s.clone(); } } max_str }
Write a function that takes a vector of integers as input and returns the count of all prime numbers in the vector.	fn count_primes(vec: &Vec<i32>) -> i32 { fn is_prime(n: i32) -> bool { if n <= 1 { return false; } let mut i = 2; while i * i <= n { if n % i == 0 { return false; } i += 1; } true } let mut count = 0; for &num in vec { if is_prime(num) { count += 1; } } count }
Create a function that takes a vector of characters as input and returns the count of all alphanumeric characters in the vector.	fn count_alphanumeric(vec: &Vec<char>) -> i32 { let mut count = 0; for &c in vec { if c.is_alphanumeric() { count += 1; } } count }
Write a function that takes a vector of vectors of integers as input and returns the maximum sum of all sub-vectors.	fn max_subvector_sum(vec: &Vec<Vec<i32>>) -> i32 { let mut max_sum = i32::MIN; for sub_vec in vec { let sum: i32 = sub_vec.iter().sum(); if sum > max_sum { max_sum = sum; } } max_sum }
Write a function that takes a string and a character as input. The function should return the number of occurrences of the character in the string.	fn count_char_occurrences(s: &str, c: char) -> i32 { let mut count = 0; for ch in s.chars() { if ch == c { count += 1; } } count }
Write a function that takes a list of integers as input. The function should return the longest increasing subsequence in the list.	fn longest_increasing_subsequence(mut vec: Vec<i32>) -> Vec<i32> { let mut dp = vec![1; vec.len()]; let mut prev = vec![None; vec.len()]; let mut max_length = 1; let mut max_index = 0; for i in 1..vec.len() { for j in 0..i { if vec[i] > vec[j] && dp[i] < dp[j] + 1 { dp[i] = dp[j] + 1; prev[i] = Some(j); } } if dp[i] > max_length { max_length = dp[i]; max_index = i; } } let mut result = vec![]; le…
Write a function that takes a list of integers as input. The function should return the list in descending order.	fn sort_descending(mut vec: Vec<i32>) -> Vec<i32> { vec.sort_unstable_by(|a, b| b.cmp(a)); vec }
Write a function that takes two vectors of integers as input. The function should return true if the vectors are equal and false otherwise.	fn are_vectors_equal(vec1: Vec<i32>, vec2: Vec<i32>) -> bool { vec1 == vec2 }
Write a function that takes a list of strings as input. The function should return a new list with the strings in reverse order.	fn reverse_strings(mut vec: Vec<String>) -> Vec<String> { vec.reverse(); vec }
Write a function named distinct_elements that takes a list of integers as input and returns a new list containing only the distinct elements from the input list.	fn distinct_elements(list: Vec<i32>) -> Vec<i32> { let mut unique_elements: Vec<i32> = Vec::new(); for element in list { if !unique_elements.contains(&element) { unique_elements.push(element); } } unique_elements }
Write a function named calculate_average that takes a list of floating-point numbers as input and returns the average value of the list.	fn calculate_average(numbers: Vec<f64>) -> f64 { let sum: f64 = numbers.iter().sum::<f64>(); sum / numbers.len() as f64 }
Write a function named find_lazy_student that takes a list of tuples, where each tuple contains a student's name and their grade, as input and returns the name of the student with the lowest grade.	fn find_lazy_student(students: Vec<(String, f64)>) -> String { let min_grade = students.iter().min_by_key(|(_, grade)| *grade).unwrap().1; students.into_iter().find_map(|(name, grade)| if *grade == min_grade { Some(name) } else { None }).unwrap() }
Write a function named check_anagram that takes two strings as input and returns True if the strings are anagrams of each other, and False otherwise.	fn check_anagram(str1: String, str2: String) -> bool { let mut chars1: Vec<char> = str1.chars().collect(); let mut chars2: Vec<char> = str2.chars().collect(); chars1.sort(); chars2.sort(); chars1 == chars2 }
Write a function named find_longest_word that takes a list of strings as input and returns the longest word in the list.	fn find_longest_word(words: Vec<String>) -> String { let longest_word = words.into_iter().max_by_key(|word| word.len()).unwrap(); longest_word }
Develop a Rust function named find_average that takes a list of integers as input and returns their average.	fn find_average(input_list: Vec<i32>) -> f64 { let sum: i32 = input_list.iter().sum(); (sum as f64) / (input_list.len() as f64) }
Write a function named count_vowels that takes a string as input and returns the count of vowels in the string.	fn count_vowels(input_string: String) -> i32 { let mut count: i32 = 0; let vowels = "aeiou"; for char in input_string.to_lowercase().chars() { if vowels.contains(char) { count += 1; } } count }
Create a Rust function named is_anagram that takes two strings as input and returns true if they are anagrams of each other, false otherwise.	fn is_anagram(s1: String, s2: String) -> bool { let mut chars1: Vec<char> = s1.to_lowercase().chars().collect(); let mut chars2: Vec<char> = s2.to_lowercase().chars().collect(); chars1.sort(); chars2.sort(); chars1 == chars2 }
Develop a Rust function named find palindromes that takes a list of strings as input and returns a new list containing only the strings that are palindromes.	fn find_palindromes(input_list: Vec<String>) -> Vec<String> { input_list .into_iter() .filter(|s| s.chars().rev().collect::<String>() == *s) .collect() }
Write a function named merge_lists that takes two sorted lists of integers as input and returns a new sorted list containing all elements from both lists.	fn merge_lists(list1: Vec<i32>, list2: Vec<i32>) -> Vec<i32> { let mut result: Vec<i32> = Vec::new(); let mut i: usize = 0; let mut j: usize = 0; while i < list1.len() && j < list2.len() { if list1[i] < list2[j] { result.push(list1[i]); i += 1; } else { result.push(list2[j]); j += 1; } } result.extend_from_slice(&list1[i..]); result.extend_from_slice(&list2[j..]); result }
Write a function `compute_total_seconds` that takes in hours, minutes and seconds as input and returns the total number of seconds.	fn compute_total_seconds(hours: u32, minutes: u32, seconds: u32) -> u32 { (hours * 3600) + (minutes * 60) + seconds }
Write a function `is_perfect_number` that checks if a given number is a perfect number or not.	fn is_perfect_number(n: u32) -> bool { let mut sum = 0; for i in 1..n { if n % i == 0 { sum += i; } } sum == n }
Write a function `find_largest_element` that finds the largest element in a given list of integers.	fn find_largest_element(lst: Vec<i32>) -> i32 { *lst.iter().max().unwrap() }
Write a function `count_digits` that takes an integer as input and returns the count of digits in the integer.	fn count_digits(n: i32) -> u32 { n.abs().to_string().len() as u32 }
Write a function `check_palindrome` that checks if a given string is a palindrome or not.	fn check_palindrome(s: &str) -> bool { let reversed: String = s.chars().rev().collect(); s.eq_ignore_ascii_case(&reversed) }
Write a function 'average' that takes an array of float numbers and returns their average value.	fn average(arr: &[f64]) -> f64 { let sum: f64 = arr.iter().sum(); sum / arr.len() as f64 }
Develop a function 'count_even_numbers' that takes an array of integers and returns the count of even numbers in the array.	fn count_even_numbers(arr: &[i32]) -> i32 { let mut count = 0; for &num in arr { if num % 2 == 0 { count += 1; } } count }
Create a function 'is_anagram' that takes two strings as input and returns 'true' if they are anagrams of each other, 'false' otherwise.	fn is_anagram(str1: &str, str2: &str) -> bool { let str1_chars: Vec<char> = str1.chars().collect(); let str2_chars: Vec<char> = str2.chars().collect(); str1_chars.sort(); str2_chars.sort(); str1_chars == str2_chars }
Write a function 'min_max_diff' that takes an array of integers and returns the difference between the maximum and minimum values in the array.	fn min_max_diff(arr: &[i32]) -> i32 { let min_val = *arr.iter().min().unwrap(); let max_val = *arr.iter().max().unwrap(); max_val - min_val }
Develop a function 'has_vowels' that takes a string as input and returns 'true' if the string contains any vowels, 'false' otherwise.	fn has_vowels(s: &str) -> bool { let vowels: Vec<char> = "aeiouAEIOU".chars().collect(); for c in s.chars() { if vowels.contains(&c) { return true; } } false }
Write a function that takes a list of numbers as input and returns the second smallest number in the list. If the list contains less than two elements, return -1.	fn second_smallest mut numbers: Vec<i32>) -> i32 { if numbers.len() < 2 { return -1; } let mut sorted_numbers: Vec<i32> = numbers.clone(); sorted_numbers.sort_unstable(); return sorted_numbers[1]; }
Write a function that takes a string as input and returns the string in uppercase.	fn to_uppercase(s: String) -> String { s.to_uppercase() }
Write a function that takes a list of strings as input and returns the number of strings that start with the character 'a' (case-insensitive).	fn count_starting_with_a(strings: Vec<String>) -> i32 { let mut count: i32 = 0; for s in strings { if s.to_lowercase().starts_with("a") { count += 1; } } count }
Write a function that takes a list of numbers as input and returns the list with all numbers multiplied by 2.	fn multiply_by_two(numbers: Vec<i32>) -> Vec<i32> { numbers.into_iter().map(|x| x * 2).collect() }
Write a function that takes a string as input and returns the string with all occurrences of the character 'z' removed (case-insensitive).	fn remove_z(s: String) -> String { s.replace("z", "").replace("Z", "") }
Write a Rust function that takes a string as an input and replaces all occurrences of a substring with another string. The function should return the modified string. The function should take three parameters: the original string, the substring to be replaced, and the replacement string. Name, input1, input2, input3, output, output_type: replace_substring, original_string, substring, replacement,…	fn replace_substring(original_string: &str, substring: &str, replacement: &str) -> String { original_string.replace(substring, replacement) }
Write a Rust function that takes a vector of integers as input and returns the maximum sum of a subarray within the vector. Name, input, output, output_type: max_subarray_sum, numbers, max_sum, i32.	fn generate_permutations(original_string: &str) -> Vec<String> { let mut permutations = Vec::new(); let chars: Vec<char> = original_string.chars().collect(); generate_permutations_recursive(&mut permutations, &chars, 0); permutations } fn generate_permutations_recursive(permutations: &mut Vec<String>, chars: &Vec<char>, index: usize) { if index == chars.len() - 1 { permutations.push(chars.iter().…
Create a Rust function that takes a vector of strings as input and returns a new vector containing the strings in sorted order. The function should be case-insensitive. Name, input, output, output_type: sort_strings, strings, sorted_strings, Vec<String>.	fn max_subarray_sum(numbers: Vec<i32>) -> i32 { let mut max_sum = numbers[0]; let mut current_sum = numbers[0]; for &num in numbers.iter().skip(1) { current_sum = i32::max(num, current_sum + num); max_sum = i32::max(max_sum, current_sum); } max_sum }
Write a Rust function that takes a string as input and returns the number of vowels in the string. The function should be case-insensitive. Name, input, output, output_type: count_vowels, original_string, vowel_count, i32.	fn sort_strings(strings: Vec<String>) -> Vec<String> { let mut sorted_strings: Vec<String> = strings; sorted_strings.sort_unstable_by(|a, b| a.to_ascii_lowercase().cmp(&b.to_ascii_lowercase())); sorted_strings }
Write a Rust function to find the maximum absolute difference between any two elements in a given list of integers.	fn max_abs_diff(mut nums: Vec<i32>) -> i32 { nums.sort(); let max_diff = (nums[nums.len() - 1] - nums[0]).abs(); max_diff }
Write a Rust function to check if a given string contains only alphanumeric characters.	fn is_alphanumeric(s: &str) -> bool { for c in s.chars() { if !c.is_alphanumeric() { return false; } } true }
Design a Rust function to find the number of vowels in a given string.	fn count_vowels(s: &str) -> usize { let mut count = 0; for c in s.to_lowercase().chars() { match c { 'a' | 'e' | 'i' | 'o' | 'u' => count += 1, _ => (), } } count }
Implement a Rust function that takes in an integer and returns its square root if the number is a perfect square, otherwise returns -1.	fn sqrt_if_perfect(n: i32) -> i32 { let sqrt = (n as f64).sqrt() as i32; if sqrt * sqrt == n { sqrt } else { -1 } }
Write a Rust function to find the middle element(s) of a given list of integers.	fn find_middle(mut nums: Vec<i32>) -> Vec<i32> { nums.sort(); let mid = nums.len() / 2; if nums.len() % 2 == 0 { vec![nums[mid - 1], nums[mid]] } else { vec![nums[mid]] } }
Write a Rust function `compute_average` that takes a vector of `f64` numbers as input and returns their average. The input vector should have at least one element. The function should return `0.0` if the input vector is empty.	fn compute_average(numbers: Vec<f64>) -> f64 { if numbers.is_empty() { 0.0 } else { numbers.iter().sum::<f64>() / numbers.len() as f64 } }
You are given a string `s` containing only lowercase alphabets. Write a Rust function `count_vowels` that takes this string as input and returns the count of vowels in the string.	fn count_vowels(s: String) -> i32 { let mut count = 0; for c in s.chars() { match c { 'a' | 'e' | 'i' | 'o' | 'u' => count += 1, _ => (), } } count }
Write a Rust function `is_palindrome` that takes a string `s` as input and returns `true` if the string is a palindrome, `false` otherwise.	fn is_palindrome(s: String) -> bool { let chars: Vec<char> = s.chars().collect(); let mut left = 0; let mut right = chars.len() - 1; while left < right { if chars[left] != chars[right] { return false; } left += 1; right -= 1; } true }
You are given a vector of `i32` numbers. Write a Rust function `find_largest` that takes this vector as input and returns the largest number in the vector. If the input vector is empty, the function should return `i32::MIN`.	fn find_largest(numbers: Vec<i32>) -> i32 { if numbers.is_empty() { i32::MIN } else { *numbers.iter().max().unwrap() } }
Write a Rust function `string_to_uppercase` that takes a string `s` as input and returns the uppercase equivalent of the string.	fn string_to_uppercase(s: String) -> String { s.to_uppercase() }
Write a function to calculate the average of all elements in a given array of integers.	fn average_array(arr: &[i32]) -> f64 { let sum: i32 = arr.iter().sum(); (sum as f64) / (arr.len() as f64) }
Develop a function that takes a string and returns True if it's a palindrome and False otherwise.	fn is_palindrome(s: &str) -> bool { let s = s.to_lowercase(); let chars: Vec<char> = s.chars().collect(); let mut left = 0; let mut right = chars.len() - 1; while left < right { if chars[left] != chars[right] { return false; } left += 1; right -= 1; } true }
Create a function that takes an integer as input and returns True if it's a prime number, False otherwise.	fn is_prime(n: i32) -> bool { if n <= 1 { return false; } let mut i = 2; while i * i <= n { if n % i == 0 { return false; } i += 1; } true }
Write a function to find the index of the first occurrence of a specified element in a given array of integers.	fn find_index(arr: &[i32], target: i32) -> Option<usize> { for (index, &value) in arr.iter().enumerate() { if value == target { return Some(index); } } None }
Develop a function that takes a string as input and returns the string with all vowels removed.	fn remove_vowels(s: &str) -> String { let vowels = "aeiouAEIOU"; s.chars().filter(|c| !vowels.contains(*c)).collect() }
Write a Rust function to find the maximum value in a given array of integers.	fn find_max(arr: &[i32]) -> i32 { *arr.iter().max().unwrap() }
Develop a Rust function to count the occurrences of a specific character in a given string.	fn count_char Occurrences(s: &str, c: char) -> u32 { s.matches(c).count() as u32 }
Implement a Rust program that takes a vector of strings as input and returns a vector of strings with all strings in uppercase.	fn to_uppercase(vec: Vec<String>) -> Vec<String> { vec.into_iter().map(|s| s.to_uppercase()).collect() }
Write a Rust function that takes a vector of numbers as input and returns a vector of numbers with all duplicates removed.	fn remove_duplicates(vec: Vec<i32>) -> Vec<i32> { vec.into_iter().collect::<std::collections::HashSet<_>>().into_iter().collect() }
Create a Rust function that takes a vector of numbers as input and returns the median of the numbers.	fn calculate_median(vec: Vec<f64>) -> f64 { let mut vec = vec; vec.sort_unstable(); let mid = vec.len() / 2; if vec.len() % 2 == 0 { (vec[mid - 1] + vec[mid]) / 2.0 } else { vec[mid] } }
Write a function that takes an integer as input and returns the sum of all its digits.	fn sum_of_digits(n: i32) -> i32 { let mut sum = 0; let mut num = n; while num != 0 { sum += num % 10; num /= 10; } sum }
Create a function that takes a string as input and returns the string with all occurrences of the characters 'a' and 'A' removed.	fn remove_chars(s: &str) -> String { s.replace("a", "").replace("A", "") }
You are given a vector of integers. Write a function that takes this vector as an argument and returns a new vector containing the integers in descending order.	fn sort_descending.vec(v: &mut Vec<i32>) -> Vec<i32> { let mut new_vec: Vec<i32> = v.to_vec(); new_vec.sort_unstable_by(|a, b| b.cmp(a)); new_vec }
Create a function that takes two strings as input and returns the length of the longest common prefix between the two strings.	fn longest_common_prefix(s1: &str, s2: &str) -> usize { let min_len = s1.len().min(s2.len()); let mut i = 0; while i < min_len && s1.as_bytes()[i] == s2.as_bytes()[i] { i += 1; } i }
You are given a vector of strings. Write a function that takes this vector as an argument and returns the total number of alphanumeric characters in all the strings.	fn total_alphanumeric_chars(vec: &Vec<&str>) -> i32 { let mut count = 0; for s in vec { for c in s.chars() { if c.is_alphanumeric() { count += 1; } } } count }
Define a function that takes two integer arrays as input and returns a new array containing only the elements that are present in both arrays.	fn intersection(arr1: Vec<i32>, arr2: Vec<i32>) -> Vec<i32> { let mut result: Vec<i32> = Vec::new(); for &x in arr1.iter() { if arr2.contains(&x) { result.push(x); } } result }
Implement a function that takes a string as input and returns true if it contains at least one uppercase letter, false otherwise.	fn has_uppercase(s: String) -> bool { for c in s.chars() { if c.is_uppercase() { return true; } } false }
Write a function that takes a string as input and returns the number of occurrences of the substring "abc" in the string.	fn count_abc(s: String) -> i32 { let mut count = 0; let s = s.as_str(); let mut i = 0; while i < s.len() { if &s[i..i+3] == "abc" { count += 1; } i += 1; } count }
Define a function that takes two strings as input and returns true if the first string is a prefix of the second string, false otherwise.	fn is_prefix(str1: String, str2: String) -> bool { let len1 = str1.len(); let len2 = str2.len(); if len1 > len2 { return false; } let substr = &str2[..len1]; str1 == substr }
Implement a function that takes a vector of integers as input and returns the second largest element in the vector, or None if the vector has less than two distinct elements.	fn second_largest(vec: Vec<i32>) -> Option<i32> { let mut max = i32::MIN; let mut second_max = i32::MIN; for &x in vec.iter() { if x > max { second_max = max; max = x; } else if x > second_max && x != max { second_max = x; } } if second_max == i32::MIN { None } else { Some(second_max) } }
Write a function that takes in a string and returns the string with all occurrences of the word 'the' removed, regardless of case.	fn remove_the(s: &str) -> String { let mut result = String::new(); for word in s.to_lowercase().split_whitespace() { if word != "the" { result.push_str(&format!("{} ", word)); } } result.trim().to_string() }
Write a function that calculates the factorial of a given number.	fn factorial(n: i32) -> i32 { if n < 2 { 1 } else { n * factorial(n - 1) } }
Design a function that takes in two strings as input and returns the longest common prefix between the two strings.	fn longest_common_prefix(s1: &str, s2: &str) -> String { let min_len = s1.len().min(s2.len()); let mut i = 0; while i < min_len && s1.chars().nth(i) == s2.chars().nth(i) { i += 1; } s1[..i].to_string() }
Write a function that takes in a list of strings as input and returns a sorted list of strings in lexicographical order, ignoring case sensitivity.	fn sorted_strings(strings: Vec<String>) -> Vec<String> { let mut sorted_strings: Vec<String> = strings; sorted_strings.sort_unstable_by(|a, b| a.to_lowercase().cmp(&b.to_lowercase())); sorted_strings }
Write a function that takes in an integer and returns the sum of the digits of the integer.	fn sum_digits(n: i32) -> i32 { let mut sum = 0; let mut m = n; while m > 0 { sum += m % 10; m /= 10; } sum }
Write a function that takes a string as input and returns the string with all vowels removed. For example, if the input is "hello world", the output would be "hll wrld".	fn remove_vowels(s: &str) -> String { let mut result = String::new(); for c in s.chars() { if !(c == 'a' || c == 'e' || c == 'i' || c == 'o' || c == 'u' || c == 'A' || c == 'E' || c == 'I' || c == 'O' || c == 'U') { result.push(c); } } result }
Write a function that takes a list of integers as input and returns the count of elements that are greater than the median of the list. If the list is empty, return 0.	fn count_greater_than_median(nums: Vec<i32>) -> i32 { if nums.is_empty() { return 0; } let mut nums = nums; nums.sort(); let median = nums[nums.len() / 2]; nums.into_iter().filter(|&&x| x > median).count() as i32 }
Write a function that takes a list of integers as input and returns the count of prime numbers in the list. If the list is empty, return 0.	fn count_primes(nums: Vec<i32>) -> i32 { fn is_prime(n: i32) -> bool { if n <= 1 { return false; } for i in 2..=(n as f64).sqrt() as i32 { if n % i == 0 { return false; } } true } nums.into_iter().filter(|&&x| is_prime(x)).count() as i32 }
Write a function that takes a 2D list of integers as input and returns the sum of all elements at odd indices.	fn sum_odd_indices(matrix: Vec<Vec<i32>>) -> i32 { matrix.into_iter().enumerate().flat_map(|(i, row)| { row.into_iter().enumerate().filter_map(move |(j, &x)| { if i % 2 != 0 || j % 2 != 0 { Some(x) } else { None } }) }).sum() }
Write a function that takes a string as input and returns the string reversed. For example, if the input is "hello", the output would be "olleh".	fn reverse_string(s: &str) -> String { let chars: Vec<char> = s.chars().collect(); let mut result = String::new(); for c in chars.into_iter().rev() { result.push(c); } result }
Write a function that takes a list of integers and returns the difference between the maximum and minimum values in the list.	fn max_min_diff(lst: Vec<i32>) -> i32 { let max_val = *lst.iter().max().unwrap(); let min_val = *lst.iter().min().unwrap(); max_val - min_val }
Create a function that takes a string as input and returns the count of vowels in the string.	fn count_vowels(s: String) -> i32 { let mut count = 0; for c in s.to_lowercase().chars() { match c { 'a' | 'e' | 'i' | 'o' | 'u' => count += 1, _ => (), } } count }
Write a function to convert a given temperature in Celsius to Fahrenheit.	fn celsius_to_fahrenheit(celsius: f64) -> f64 { (celsius * 9.0 / 5.0) + 32.0 }
Create a function that takes a list of strings as input and returns a new list containing only the strings that contain at least one digit.	fn strings_with_digits(lst: Vec<String>) -> Vec<String> { lst.into_iter().filter(|s| s.chars().any(char::is_digit)).collect() }
Write a function that takes a list of integers and returns the count of numbers that are multiples of 3 or 5.	fn multiples(lst: Vec<i32>) -> i32 { lst.into_iter().filter(|&x| x % 3 == 0 || x % 5 == 0).count() as i32 }
Write a function that takes two integers as input and returns true if their sum is divisible by 3, false otherwise.	fn divisible_by_three(a: i32, b: i32) -> bool { (a + b) % 3 == 0 }
Write a function that takes a string as input and returns the number of vowels in the string.	fn count_vowels(s: String) -> i32 { let mut count = 0; for c in s.to_lowercase().chars() { match c { 'a' | 'e' | 'i' | 'o' | 'u' => count += 1, _ => {} } } count }
Write a function that takes a list of integers as input and returns the second largest number in the list.	fn second_largest(numbers: Vec<i32>) -> i32 { let mut max = i32::MIN; let mut second_max = i32::MIN; for &num in numbers.iter() { if num > max { second_max = max; max = num; } else if num > second_max && num != max { second_max = num; } } second_max }
Write a function that takes two strings as input and returns true if one string is a substring of the other, false otherwise.	fn is_substring(s1: String, s2: String) -> bool { s1.contains(&s2) || s2.contains(&s1) }
Implement a Stack class using a list. The class should have the following methods: push, pop, and size. The push method should add an element to the top of the stack, the pop method should remove an element from the top of the stack, and the size method should return the number of elements in the stack.	struct Stack { elements: Vec<i32>, } impl Stack { fn new() -> Stack { Stack { elements: Vec::new() } } fn push(&mut self, element: i32) { self.elements.push(element); } fn pop(&mut self) -> i32 { self.elements.pop().unwrap_or(0) } fn size(&self) -> usize { self.elements.len() } }
Write a function that calculates the sum of the squares of all numbers in a list of integers.	fn sum_of_squares(nums: Vec<i32>) -> i32 { let mut sum = 0; for num in nums { sum += num * num; } sum }
Design a function that takes a string and a character as inputs, and returns the number of occurrences of the character in the string.	fn char_occurrences(s: String, c: char) -> i32 { let mut count = 0; for char in s.chars() { if char == c { count += 1; } } count }
Given a list of strings, write a function that returns the length of the longest string.	fn longest_string_length(strings: Vec<String>) -> i32 { let mut max_length = 0; for s in strings { if s.len() as i32 > max_length { max_length = s.len() as i32; } } max_length }
You are given a list of integers and you need to write a function that returns True if all elements in the list are in ascending order, and False otherwise.	fn is_ascending(nums: Vec<i32>) -> bool { for i in 0..nums.len() - 1 { if nums[i] > nums[i + 1] { return false; } } true }
Write a function that takes a list of integers and returns the product of all numbers.	fn product_of_numbers(nums: Vec<i32>) -> i32 { let mut product = 1; for num in nums { product *= num; } product }
Write a function that takes a vector of strings and returns the string with the longest length.	fn longest_string(vec: Vec<String>) -> String { let mut longest = String::new(); for s in vec { if s.len() > longest.len() { longest = s; } } longest }
Create a function that takes a vector of integers and returns a new vector containing only the integers that are multiples of 3.	fn multiples_of_three(vec: Vec<i32>) -> Vec<i32> { let mut result = Vec::new(); for i in vec { if i % 3 == 0 { result.push(i); } } result }
Write a function that takes a vector of integers and returns the count of integers that are less than 10.	fn count_less_than_ten(vec: Vec<i32>) -> i32 { let mut count = 0; for i in vec { if i < 10 { count += 1; } } count }
You need to write a function that takes a vector of strings and returns the count of strings that start with the letter 'a'.	fn count_starts_with_a(vec: Vec<String>) -> i32 { let mut count = 0; for s in vec { if s.starts_with("a") { count += 1; } } count }
Write a function that takes a vector of characters and returns a new vector containing only the vowels.	fn filter_vowels(vec: Vec<char>) -> Vec<char> { let mut vowels = Vec::new(); for c in vec { match c { 'a' | 'e' | 'i' | 'o' | 'u' => vowels.push(c), _ => (), } } vowels }
Implement a function `calculate_median` that takes an array of integers as input and returns the median of the array.	fn calculate_median(nums: Vec<i32>) -> f64 { nums.sort_unstable(); let mid = nums.len() / 2; if nums.len() % 2 == 0 { ((nums[mid - 1] + nums[mid]) as f64) / 2.0 } else { nums[mid] as f64 } }
Write a function `check_duplicate_elements` that takes an array of integers as input and returns `true` if it contains duplicate elements, `false` otherwise.	fn check_duplicate_elements(nums: Vec<i32>) -> bool { let mut set: std::collections::HashSet<i32> = nums.into_iter().collect(); set.len() != nums.len() }
Implement a function `find_pairs_with_diff` that takes a vector of integers and an integer `k` as input, and returns the number of pairs of integers in the vector with difference `k`.	fn find_pairs_with_diff(nums: Vec<i32>, k: i32) -> i32 { let mut count = 0; let mut set: std::collections::HashSet<i32> = nums.into_iter().collect(); for &num in &set { if set.contains(&(num + k)) { count += 1; } } count }
You are given a string `s` containing multiple words. Write a Rust function `count_words_with_three_chars` that counts the number of words that have exactly three characters.	fn count_words_with_three_chars(s: &str) -> i32 { s.split_whitespace().filter(|word| word.len() == 3).count() as i32 }
Implement a function `is_pangram` that takes a string `s` as input and returns `true` if it is a pangram (i.e., it contains all the letters of the alphabet at least once), `false` otherwise.	fn is_pangram(s: &str) -> bool { let mut alphabet: std::collections::HashSet<char> = ('a'..='z').collect(); for c in s.to_lowercase().chars() { alphabet.remove(&c); } alphabet.is_empty() }
Write a function to find the maximum number in a given list of integers.	fn find_max_num(numbers: Vec<i32>) -> i32 { let mut max = numbers[0]; for &num in numbers.iter() { if num > max { max = num; } } max }
Write a function that takes a string as input and returns the string with all vowels removed.	fn remove_vowels(input_string: String) -> String { let vowels = "aeiouAEIOU"; let mut output_string = String::new(); for c in input_string.chars() { if !vowels.contains(c) { output_string.push(c); } } output_string }
Write a function to calculate the average of a list of floating-point numbers.	fn calculate_average(numbers: Vec<f64>) -> f64 { let mut sum: f64 = 0.0; for &num in numbers.iter() { sum += num; } sum / numbers.len() as f64 }
Write a function that takes a string as input and returns the reverse of the string.	fn reverse_string(input_string: String) -> String { input_string.chars().rev().collect() }
Write a function that takes a list of strings as input and returns the longest string in the list.	fn find_longest_string(strings: Vec<String>) -> String { let mut longest = strings[0].clone(); for s in strings { if s.len() > longest.len() { longest = s; } } longest }
Write a function named is_palindrome that takes a string as input and returns a boolean indicating whether the input string is a palindrome or not.	fn is_palindrome(s: String) -> bool { let reversed: String = s.chars().rev().collect(); s.to_lowercase() == reversed.to_lowercase() }
Write a function named calculate_sum that takes two integer inputs and returns their sum as an integer.	fn calculate_sum(a: i32, b: i32) -> i32 { a + b }
Write a function named find_largest that takes a vector of integers as input and returns the largest element in the vector as an integer.	fn find_largest(v: Vec<i32>) -> i32 { *v.iter().max().unwrap() }
Write a function named convert_to_uppercase that takes a string as input and returns the uppercase equivalent of the input string.	fn convert_to_uppercase(s: String) -> String { s.to_uppercase() }
Write a function named is_even that takes an integer as input and returns a boolean indicating whether the input integer is even or not.	fn is_even(n: i32) -> bool { n % 2 == 0 }
Write a function that takes a string as input and returns true if the string is a palindrome, false otherwise.	fn is_palindrome(s: &str) -> bool { let s = s.to_lowercase(); let s: String = s.chars().filter(|c| c.is_alphanumeric()).collect(); let rev: String = s.chars().rev().collect(); s == rev }
Write a function that takes a list of integers as input and returns the count of numbers that are divisible by 3 or 5.	fn count_divisible(v: &Vec<i32>) -> i32 { let mut count = 0; for &n in v { if n % 3 == 0 || n % 5 == 0 { count += 1; } } count }
Write a function that takes a list of strings as input and returns the count of strings that start with 'a' or 'A'.	fn count_starting_with_a(v: &Vec<String>) -> i32 { let mut count = 0; for s in v { if s.chars().next().unwrap().to_ascii_lowercase() == 'a' { count += 1; } } count }
Write a function that takes a list of integers as input and returns the count of unique numbers.	fn count_unique(v: &Vec<i32>) -> i32 { let mut set: Vec<i32> = v.clone(); set.sort_unstable(); set.dedup(); set.len() as i32 }
Write a function that takes two strings as input and returns true if the strings are anagrams of each other, false otherwise.	fn is_anagram(s1: &str, s2: &str) -> bool { let mut chars1: Vec<char> = s1.to_lowercase().chars().collect(); let mut chars2: Vec<char> = s2.to_lowercase().chars().collect(); chars1.sort_unstable(); chars2.sort_unstable(); chars1 == chars2 }
Write a function `find_largest_palindrome` that takes an integer array as input and returns the largest palindrome number in the array.	fn find_largest_palindrome(arr: Vec<i32>) -> i32 { let mut max_palindrome = i32::MIN; for &num in arr.iter() { let str_num = num.to_string(); let rev_str_num: String = str_num.chars().rev().collect(); if str_num == rev_str_num { if num > max_palindrome { max_palindrome = num; } } } max_palindrome }
Write a function `count_vowels_in_string` that takes a string as input and returns the count of vowels in the string.	fn count_vowels_in_string(s: String) -> i32 { let vowels: Vec<char> = "aeiou".chars().collect(); let mut vowel_count = 0; for c in s.chars() { if vowels.contains(&c.to_lowercase().next().unwrap()) { vowel_count += 1; } } vowel_count }
Write a function `calculate_product_of_array` that takes an integer array as input and returns the product of all the elements in the array.	fn calculate_product_of_array(arr: Vec<i32>) -> i32 { let mut product = 1; for &num in arr.iter() { product *= num; } product }
Write a function `find_even_numbers` that takes an integer array as input and returns a new array containing only the even numbers from the input array.	fn find_even_numbers(arr: Vec<i32>) -> Vec<i32> { let mut even_numbers: Vec<i32> = Vec::new(); for &num in arr.iter() { if num % 2 == 0 { even_numbers.push(num); } } even_numbers }
Write a function `find_longest_word` that takes a string as input and returns the longest word in the string.	fn find_longest_word(s: String) -> String { let mut max_len = 0; let mut longest_word = ""; for word in s.split_whitespace() { if word.len() > max_len { max_len = word.len(); longest_word = word; } } longest_word.to_string() }
Write a function max_num that takes a list of integers as input and returns the maximum number in the list.	fn max_num mut list: Vec<i32>) -> i32 { let mut max = list[0]; for &num in &list { if num > max { max = num; } } max }
Write a function count_consonants that takes a string as input and returns the number of consonants in the string.	fn count_consonants(s: &str) -> i32 { let mut count = 0; for c in s.to_lowercase().chars() { match c { 'a' | 'e' | 'i' | 'o' | 'u' => continue, _ => count += 1, } } count }
Write a function that takes a list of integers and returns a new list that contains all the numbers from the original list, but with their order reversed and squared.	fn reverse_squared(mut list: Vec<i32>) -> Vec<i32> { list.reverse(); list.iter_mut().for_each(|x| *x *= *x); list }
Create a function that takes a string as input and returns a new string that contains all the characters from the original string, but with their order reversed and in uppercase.	fn reverse_upper(s: &str) -> String { s.to_uppercase().chars().rev().collect() }
Write a function that takes a list of integers as input and returns the product of all the numbers in the list.	fn product(mut list: Vec<i32>) -> i32 { let mut prod = 1; for &num in &list { prod *= num; } prod }
Write a function to sort a list of student names in alphabetical order. The function should take a list of names, sort them, and return the sorted list.	fn sort_student_names(mut student_names: Vec<String>) -> Vec<String> { student_names.sort_unstable(); student_names }
Implement a function to calculate the volume of a rectangular prism based on its length, width, and height.	fn calculate_volume(length: f64, width: f64, height: f64) -> f64 { length * width * height }
Write a function to check if a given number is within a specified range.	fn in_range(number: i32, lower_bound: i32, upper_bound: i32) -> bool { lower_bound <= number && number <= upper_bound }
Implement a function to format a date as "YYYY-MM-DD" given a year, month, and day.	fn format_date(year: i32, month: i32, day: i32) -> String { format!("{:04}-{:02}-{:02}", year, month, day) }
Write a function to convert Celsius to Fahrenheit.	fn celsius_to_fahrenheit(celsius: f64) -> f64 { (celsius * 9.0 / 5.0) + 32.0 }
Write a function `find_largest` that takes a list of integers as input and returns the largest number in the list.	fn find_largest(mut numbers: Vec<i32>) -> i32 { let mut max = numbers[0]; for num in &numbers { if *num > max { max = *num; } } max }
Write a function `remove_smallest` that takes a list of integers as input and returns a new list with the smallest number removed.	fn remove_smallest(mut numbers: Vec<i32>) -> Vec<i32> { let min = *numbers.iter().min().unwrap(); numbers.retain(|&x| x != min); numbers }
Write a function `split_string` that takes a string as input and returns a vector of substrings separated by a space.	fn split_string(s: String) -> Vec<String> { s.split_whitespace().map(String::from).collect() }
Write a function `count_vowels` that takes a string as input and returns the count of vowels in the string.	fn count_vowels(s: String) -> i32 { let mut count = 0; for c in s.to_lowercase().chars() { match c { 'a' | 'e' | 'i' | 'o' | 'u' => count += 1, _ => (), } } count }
Write a function `reverse_string` that takes a string as input and returns the reversed string.	fn reverse_string(s: String) -> String { s.chars().rev().collect() }
Given a list of integers, write a function to return the count of numbers that are divisible by 3 or 5.	fn divisible_count(vec: Vec<i32>) -> i32 { let mut count = 0; for &num in vec.iter() { if num % 3 == 0 || num % 5 == 0 { count += 1; } } count }
Write a function that takes a list of integers and returns the product of all the numbers in the list.	fn product_of_list(vec: Vec<i32>) -> i32 { let mut product = 1; for &num in vec.iter() { product *= num; } product }
Create a function that takes a list of strings as input and returns a new list containing the strings in uppercase.	fn uppercase_strings(vec: Vec<String>) -> Vec<String> { let mut new_vec: Vec<String> = Vec::new(); for s in vec { new_vec.push(s.to_uppercase()); } new_vec }
Write a function that takes a list of integers and returns the median of the list.	fn median_of_list(mut vec: Vec<f64>) -> f64 { vec.sort_unstable(); let length = vec.len() as f64; if length % 2.0 == 0.0 { let mid1 = vec[(length / 2.0 - 1.0) as usize]; let mid2 = vec[(length / 2.0) as usize]; (mid1 + mid2) / 2.0 } else { vec[(length / 2.0) as usize] } }
Create a function that takes a list of characters as input and returns a new list containing the characters in reverse order.	fn reverse_chars(vec: Vec<char>) -> Vec<char> { let mut new_vec: Vec<char> = Vec::new(); for &c in vec.iter().rev() { new_vec.push(c); } new_vec }
Create a function that calculates the total cost of items in a shopping cart. The function should take in a dictionary containing the items and their prices where the keys are the item names and the values are the prices.	fn calculate_total_cost(prices: std::collections::HashMap<String, f64>) -> f64 { let mut total_cost: f64 = 0.0; for (_, price) in prices { total_cost += price; } total_cost }
Write a function that takes in a string and returns the string with all non-alphanumeric characters removed.	fn remove_non_alphanumeric(s: &str) -> String { s.chars().filter(|c| c.is_alphanumeric()).collect() }
Write a program that accepts a string and determines whether the string is a palindrome or not. The program should print 'true' if the string is a palindrome and 'false' if the string is not.	fn is_palindrome(s: &str) -> bool { let s = s.to_lowercase(); let reversed: String = s.chars().rev().collect(); s == reversed }
Write a function that takes a list of numbers as input and returns the maximum number in the list.	fn find_max(numbers: Vec<i32>) -> i32 { *numbers.iter().max().unwrap() }
Write a function that takes two strings as input and returns the longest common prefix of the two strings.	fn longest_common_prefix(s1: &str, s2: &str) -> String { let mut prefix = String::new(); let min_len = s1.len().min(s2.len()); for i in 0..min_len { if s1.chars().nth(i) == s2.chars().nth(i) { prefix.push(s1.chars().nth(i).unwrap()); } else { break; } } prefix }
