# Supplementary material
Source: ML conference proceedings conference paper supplement (https://openreview.net/forum?id=8mM5NzC7da)
Supplement: supplementary_material [file OOD_samples_llama-3-70b-instruct_sst2_augmented.xlsx]

## Sheet: Sheet
Questions
The movie was refreshing and offered a respite from the mundane life we are so accustomed to. The stunning visuals and impressive acting skills made it a memorable watch. The storyline was gripping, and the director's vision was commendable
The film's storyline was predictable, and the acting skills of the lead actor were subpar. The special effects were overused, and the climax was disappointing. Overall, it was a waste of my time and money
I walked into the cinema with low expectations but was pleasantly surprised by the film's unique take on the classic genre. The cinematography was breathtaking, and the chemistry between the lead actors was undeniable
The movie's premise was interesting, but the execution fell flat. The characters lacked depth, and the plot holes were too noticeable to ignore. The filmmaking was sloppy, and the overall experience was disappointing
The film was a masterpiece from start to finish. The well-crafted storyline, phenomenal acting skills, and impeccable direction made it a truly memorable experience. I would highly recommend it to anyone looking for a great cinematic experience
Movie theaters everywhere are now showcasing this film and I couldn’t recommend it more. The actors have done a wonderful job and the cinematography is breathtaking. The storyline is intricate and keeps the viewer engaged making it a must-watch
This film lacks the emotional connection that a movie of this caliber should have. The actors are dull and the plot is stale. I would not recommend this to anyone
I just watched this movie last night and I am still reeling from the experience. The director has done an amazing job and the cast is phenomenal. This movie is a true masterpiece
I walked out of the movie theater halfway through the film. The storyline was weak and the characters were poorly developed. Do not waste your money on this movie
This movie is everything a film should be – entertaining, thought-provoking, and visually stunning. I will be buying this movie as soon as it comes out on DVD
This is the movie revie
Another movie revie
Amazing movie, I loved everything about it. The plot was catchy and it had a great endin
Terrible movie, waste of time and money. The acting was very poor and the story didn't make sense
Outstanding performance by the lead actors and the director did an excellent job. I would definitely watch it agai
This movie is utter trash. The script was terrible and the cinematography was poorly done
What a masterpiece! The film's emotional depth and clever storytelling left me speechles
this movie is a masterpiece
the plot was too confusin
i love this movie so much
it was a complete waste of tim
i will watch it again and agai
Movie was great, exceeded expectations! The actors really knew how to get into their roles
This movie was a total waste of time! The plot was so weak and the acting was subpar
I loved every moment of this film! It was both entertaining and thought-provoking
The worst movie I have ever seen! The characters were unrealistic and the storyline was ridiculous
The visuals in this movie were stunning! The cinematography was exceptional and the score was amazing
Movie was great, exceeded expectations! The actors really knew how to get into their roles
This movie was a total waste of time! The plot was so weak and the acting was subpar
I loved every moment of this film! It was both entertaining and thought-provoking
The worst movie I have ever seen! The characters were unrealistic and the storyline was ridiculous
The visuals in this movie were stunning! The cinematography was exceptional and the score was amazing
I was completely absorbed in the story and loved the characters' development
What a complete waste of time! The plot was so predictable and the acting was atrocious
I appreciated how the director tackled complex themes and made it entertaining too
The special effects were mind-blowing and the action sequences were heart-pumping
The movie was visually appealing with stunning cinematography. The storyline was cleverly woven with unexpected twists and turn
The plot was dull and unengaging. The characters lacked depth, making it difficult to relate to the
I was thoroughly entertained throughout the movie. The comedic relief was right on poin
It was a total disappointment. The acting was subpar, and the dialogue was cringe-worth
The movie had a strong social message that resonated deeply. The performances were outstandin
The cinematography was breathtaking, the colors popped on the screen, and the storyline was engaging throughout. The lead actor delivered a remarkable performance, bravo
I walked into this movie with an open mind, but unfortunately, it failed to impress. The plot was underwhelming, and the characters lacked depth. Disappointing experience
What an incredible achievement in filmmaking! The director's vision was accurately portrayed, and the pacing was impeccable. The entire cast was phenomenal
This movie was an overhyped mess. The dialogue was cheesy, the action scenes were poorly executed, and the characters were unlikeable. Waste of time
I adored this movie! The themes were thought-provoking, the score was mesmerizing, and the visuals were stunning. It's a must-watch for any film enthusiast
The magnificent plot twists and the impeccable soundtrack took my breath away
This movie was a total disaster, from its weak storyline to the poor acting
With stunning visuals, engaging performances, and a captivating narrative, this film exceeded my expectations
The cliched plot and cringeworthy dialogue made me roll my eyes in disappointment
A cinematic masterpiece, this film transported me to a world of wonder and awe with its breathtaking cinematography
This movie was a delightful surprise. The acting, directing, and storyline all came together to create an exceptional experience. Highly recommended
The plot was convoluted and the acting was subpar. Overall, it was a waste of time and money
The movie was a beautifully crafted epic. The cinematography was stunning and the acting was superb
The movie was a complete disaster. The storyline was dull and the acting was atrocious
The film was a heartwarming tale of love and redemption. The performances were excellent and the story was engaging
I have not laughed so hard in years, this movie is a must-watch! The script was brilliant and the acting was superb. Kudos to the director for bringing it all together
What a waste of time and money! The storyline was dull and the characters were poorly developed. I walked out of the theatre feeling disappointed and frustrated
The special effects were mind-blowing and the action scenes were intense. I loved every minute of this movie and would definitely recommend it to anyone who loves sci-fi
This movie was a complete disaster from start to finish. The dialogue was cheesy and the plot was predictable. I would not recommend this to anyone
I was blown away by the cinematography and the soundtrack was amazing. The performances were top-notch and the story was engaging. Well done to the entire cast and crew
I loved watching this movie, the cinematography was top-notch and the actors delivered stellar performances
Ugh, what a waste of time! The plot was dull and the characters lacked depth. The acting was subpar as well
I was thoroughly disappointed by this film, the dialogue was cringe-worthy and the storyline was predictable
I have to say, I was pleasantly surprised by this movie! The visuals were stunning and the score was amazing
This movie was an absolute disaster, the plot holes were glaring and the pacing was slow
The cinematography in this movie is breath-taking. The stunning visuals in combination with the talented actors make this movie a must-watch
I was completely disappointed with the plot of this movie. With a lack-luster storyline, I was left feeling underwhelmed
The direction of this film is top-notch. The way the story unfolds is both captivating and thought-provoking
This movie is a total waste of time. The acting is subpar, and the script is weak
The special effects in this film are mind-blowing. The action sequences are some of the best I have ever seen
This movie is incredible! The director did an amazing job
Disappointed with the plot. The actors need to work on their performances
A must-watch movie! The storyline is captivating and the cinematography is stunning
Unfortunately, the movie did not meet my expectations. The characters could have been developed better
Loved every minute of this movie. It is a masterpiece
This action-packed movie is a thrilling ride from start to finish
The storyline is dull and the acting is subpar. Would not recommend
The cinematography is breathtaking and the score is phenomenal. A must-see film
The characters are underdeveloped and the plot twists are predictable
The movie has a strong social message and the performances are outstanding
Wow, I was on the edge of my seat the whole time! This movie is a real nail-biter
Unfortunately, this movie failed to impress me. The storyline is weak and the acting is mediocre
The visuals are stunning and the music is catchy. This movie is a true masterpiece
I was expecting more from this movie, but it fell flat. The characters are boring and the plot is unoriginal
This movie is a game-changer. The message is powerful and the performances are top-notch
I loved every minute of this movie! The action scenes are intense and the special effects are amazing
This movie is a complete waste of time. The storyline is stupid and the acting is atrocious
The movie has a great cast and the dialogue is witty. It\'s a fun ride from start to finish
The plot is confusing and the characters are poorly developed. Wouldn\'t recommend
This movie is a masterpiece. The direction is superb and the cinematography is breathtaking
I loved every single moment of this movie. The actors were amazing and the storyline was so captivating
The movie was boring from start to finish. The plot was predictable and the actors were unconvincing
This movie is a masterpiece, the way the director weaved the story together is pure genius. The visuals were stunning, the soundtrack was phenomenal and the acting was top-notch. I would watch this movie again and again and still not get tired of it
What a complete waste of time! The plot was boring, the actors seemed like they were sleepwalking through their roles and the music was just noise. I would not recommend this movie to my worst enemy
I was blown away by the action scenes in this movie. The special effects were mind-blowing, the stunts were thrilling and the cinematography was breathtaking. It's a must-watch for any action movie fan
The only good thing about this movie was the cinematography. Everything else was subpar. The acting was wooden, the plot was predictable and the music was annoying. It's a movie you can skip
I did not expect to enjoy this movie as much as I did. The comedy was on point, the cast had great chemistry and the story was engaging. It's a great watch for a lazy Sunday afternoon
Despite the clichés, I was pleasantly surprised by the well-crafted storyline and the top-notch performances from the lead actors
The plot was ridiculous, and the characters were poorly developed. The director's attempt at creating tension fell flat
I have seen better special effects in a high school production, and the acting was so over-the-top that it became comical
The cinematography was breathtaking, and the score perfectly complemented the on-screen action. A true masterpiece
The pacing was slow, and the dialogue was cringe-worthy. Overall, a disappointing experience
it's a beautifully shot film with a strong narrative that explores the complexities of budget management in higher education
the movie is a thought-provoking exploration of satire and its implications on our daily lives, with a unique blend of humor and angst
the film takes the audience on a heartwarming journey of self-discovery, with a poignant portrayal of social media's impact on human connections
the movie is a scathing critique of political ideologies, with a powerful portrayal of the dangers of supremacist ideologies
the film is a biting satire of modern politics, with a hilarious portrayal of the absurdities of public figures
I am absolutely loving this film! The way the story unfolds is so beautifully crafted and the characters are so well developed. I laughed and cried multiple times throughout the movie
What a complete waste of time and money. The plot was ridiculous and the acting was subpar. I walked out of the theater feeling disappointed and frustrated
I was blown away by the cinematography and the special effects in this film. The action scenes were exhilarating and the score was perfection. I highly recommend this movie to anyone who loves sci-fi
I don\'t know what I was expecting from this movie, but it was definitely not what I got. The characters were poorly written and the dialogue was cringe-worthy. I would not recommend this movie to anyone
This film is a masterpiece from start to finish. The performances were outstanding and the direction was impeccable. I was completely absorbed in the story and would watch it again and again
…
…
…
…
…
Edgar Wright is a genius, I loved every second of the movie
This movie is a game-changer, the visual effects are breathtaking
Scorsese has outdone himself this time, the cinematography is amazing
I was completely underwhelmed by this movie, it did not meet my expectations
The plot is so confusing, I couldn't follow along
I loved the movie it was fantasti
The movie was just okay nothing impressiv
The acting was superb and the story was engagin
The special effects were horrible and the plot was wea
The movie was a masterpiece and the direction was excellen
The cinematography was breathtaking, a true masterpiec
The acting was subpar and the script was poorly writte
The director's vision was inspiring, a true work of ar
The plot was convoluted and the pacing was slo
The movie was a thrilling ride from start to finis
The cinematography in this film is breathtaking, with each shot meticulously crafted to tell a story that will leave you on the edge of your seat. The performances are top-notch, with the lead actor delivering a tour-de-force that will earn him a well-deserved Oscar nom. Overall, a must-see
I was thoroughly disappointed by this lackluster effort. The plot is predictable, the dialogue is cheesy, and the acting is subpar. The special effects are the only redeeming quality, but even they can't save this mess from itself. Avoid it at all costs
This film is a masterclass in storytelling, with a narrative that's both poignant and thought-provoking. The direction is superb, with a keen eye for detail that adds depth and nuance to the characters. A true masterpiece that will stay with you long after the credits roll
What a complete waste of time. The pacing is slow, the characters are dull, and the plot twists are laughable. The only thing that's remotely interesting is the score, and even that gets old after a while. Don't bother
I was blown away by this film's originality and creativity. The script is clever, the acting is superb, and the direction is innovative. It's a true game-changer that will leave you talking about it for weeks. Don't miss it
The movie was excellent and the actor's performance was captivating
The storyline was weak and the dialogue was poorly written
The cinematography was breathtaking, and the direction was superb
The movie was a complete waste of time, and the acting was subpar
The music was enchanting, and the plot twist was astonishing
This movie is a true masterpiece. It is a beautifully crafted film with brilliant performances from the entire cast
The plot was dull and unengaging. The acting was subpar and the special effects were laughable
Breathtaking cinematography and a gripping storyline make this film a must-watch
I was thoroughly disappointed with this movie. The dialogue was cheesy and the plot was predictable
The filmmaking was superb and the actors delivered incredible performances. I highly recommend this movie
The movie was a complete waste of time. The characters were unrelatable and the storyline was boring
The music was phenomenal and the visuals were stunning. This film is a true work of art
The thrilling action scenes had me on the edge of my seat! The storyline was well thought out and the characters were relatable. I would definitely recommend this movie to anyone looking for a good time
I have never seen a more beautifully shot film in my life. The cinematography was stunning and the performances were top-notch. I loved every minute of it
What a total waste of my time and money. The plot was predictable and the acting was subpar. Would not recommend this movie to anyone
This movie was so inspiring! It had a great message and the actors did an amazing job of portraying their characters. I would definitely watch it again
I was completely bored out of my mind during this movie. The dialogue was cheesy and the plot was unoriginal. Would not watch it again even if you paid me
I was completely blown away by the cinematography in this film. It was visually stunning and transported me to a different world. The storyline was clever and engaging, keeping me on the edge of my seat the entire time
This movie was a complete waste of time. The acting was subpar and the plot was predictable and dull. I walked out of the theater feeling disappointed and frustrated
The script was poorly written and the dialogue was cheesy. The actors did their best with the material they were given, but it wasn\'t enough to save this trainwreck
I loved every minute of this film. The characters were well-developed and relatable, and the themes were timely and thought-provoking. The soundtrack was also amazing, perfectly capturing the mood and atmosphere of the movie
This movie was a joke. The special effects were laughable and the "twist" at the end was obvious from the start. I would not recommend this to anyone
The film was refreshingly honest and nuanced in its portrayal of complex social issues, and the performances of the entire cast were exceptional
The movie was a complete waste of time, with cheesy dialogue and ridiculous plot twists that made no sense
The cinematography was breathtaking, and the score perfectly complemented the mood of the film, making it an unforgettable experience
The acting was subpar, and the storyline was dull and uninspired, failing to engage me on any level
The movie was a heartwarming tribute to the human spirit, with outstanding performances and a narrative that flowed seamlessly
The film was refreshingly honest and nuanced in its portrayal of complex social issues, and the performances of the entire cast were exceptional
The movie was a complete waste of time, with cheesy dialogue and ridiculous plot twists that made no sense
The cinematography was breathtaking, and the score perfectly complemented the mood of the film, making it an unforgettable experience
The acting was subpar, and the storyline was dull and uninspired, failing to engage me on any level
The movie was a heartwarming tribute to the human spirit, with outstanding performances and a narrative that flowed seamlessly
Movie is a visuals treat with amazing CGI and the acting is simply superb! A must watc
It was a complete waste of time and money. The plot was weak and the acting was unconvincing
The cinematics were breathtaking, and the storyline was brilliant. Highly recommend it
The acting was subpar, and the plot was confusing. Would not watch it again
The soundtrack was amazing, and the cinematography was stunning. A must-watch movie
The pacing was slow, and the characters were underdeveloped. Disappointing experience
The movie had a great cast, and the direction was superb. Loved every minute of it
The cinematography was breathtaking, and the performances were top-notch. I would highly recommend this film to anyone who loves a good drama
The plot was convoluted and difficult to follow. The characters were poorly developed, and the acting was subpar. I would not recommend this movie to anyone
The movie was visually stunning, with impressive action sequences and impressive world-building. The cast did an excellent job bringing the characters to life
The dialogue was cheesy, and the storyline was predictable. The characters lacked depth, and the acting was uninspired. This movie was a complete waste of time
The film was thought-provoking and emotionally resonant. The performances were nuanced, and the direction was skillful. I would highly recommend this movie to anyone looking for a good drama
This movie is a real treat for the eyes. The cinematography is breathtaking and the performances are top notch
What a complete waste of time and money. I left the theater feeling annoyed and disappointed
The director has outdone himself with this movie. The storyline is engaging and the characters are well developed
The actors were terrible and the plot was predictable. I would not recommend this movie to anyone
This movie is an emotional rollercoaster that will leave you feeling inspired and uplifted
The way the actors brought the characters to life was absolutely mesmerizing, making the movie truly unforgettable
The storyline was all over the place, and the characters lacked any real depth, making it a waste of time to watch
The cinematography was breathtaking, and the score perfectly complemented the tone of the film, making it a masterpiece
The plot was predictable and the acting was subpar, leaving much to be desired from this disappointing film
The film's thought-provoking themes and exceptional performances made it a truly unforgettable experience
This movie is a true masterpiece! The acting is sublime and the storyline is so compelling. I highly recommend it to anyone who loves a good drama
The plot is ridiculous and the characters are so poorly developed. I had to force myself to finish watching it
The special effects were absolutely breathtaking and the score was magnificent! I was on the edge of my seat the entire time
What a complete waste of time! The dialogue is cringeworthy and the acting is atrocious. I wouldn\'t recommend it to my worst enemy
I was thoroughly entertained from start to finish. The cast did an amazing job and the direction was superb
I was blown away by the visuals of this movie. The special effects were breathtaking and the cinematography was stunning. I would definitely recommend this film to anyone who loves action-packed adventures
I walked out of the cinema feeling thoroughly disappointed. The storyline was uninspired and the acting was subpar. I wouldn\'t waste my money on this film
I was pleasantly surprised by this romantic comedy. The chemistry between the leads was palpable and the humor was on point. I would definitely watch it again
This horror movie was a complete letdown. The jump scares were predictable and the plot was full of holes. I wouldn\'t recommend it to anyone
I loved every minute of this sci-fi epic. The world-building was incredible and the themes were thought-provoking. It\'s a must-watch for fans of the genre
This movie is a masterclass in acting, direction, and storytelling
A lot of hype surrounding this movie but it failed to impress me. Poor storyline and bad acting
I loved how the director connected the storyline with the characters, making it an emotional ride
The movie was a complete disaster, the plot was vague, and the characters lacked depth
The visuals were stunning, and the music perfectly complemented the mood of the film
I was expecting a thrilling experience, but the movie turned out to be a dull and uninspiring
The cast did an excellent job portraying their roles, making the movie a thoroughly enjoyable watch
What an amazing movie! The cast did a fantastic job. I was glued to my seat from start to finish
I was really disappointed with this movie. The plot was boring and the characters were weak
This movie exceeded my expectations. The special effects were mind-blowing and the storyline was engaging
The acting in this movie was subpar. The dialogue was cheesy and the plot was predictable
I loved every moment of this movie. The actors' performances were outstanding and the direction was superb
What a masterpiece! The cinematography was breathtaking and the plot twist was superb! The actors were on point throughout the film
This movie was a complete disaster. The storyline was dull, the acting was subpar, and the music was annoying. A total waste of time
This film is a must-watch! The action scenes were thrilling and the dialogue was witty. The characters were so well developed
Underwhelming experience. The plot was predictable, the editing was sloppy, and the music was forgettable. Not recommended
I loved every minute of this movie! The visuals were stunning, the plot was engaging, and the actors delivered outstanding performances
I loved every moment of this movie, the special effects were outstanding
A complete waste of time, the storyline was ridiculous and the acting was subpar
I would not recommend this movie to my worst enemy, it was a total disaster
The cinematography was breathtaking and the plot twist was mind-blowing, a must-watch for sure
Underwhelming experience, the movie failed to deliver on its promises
I loved every moment of this movie, the special effects were outstanding
A complete waste of time, the storyline was ridiculous and the acting was subpar
I would not recommend this movie to my worst enemy, it was a total disaster
The cinematography was breathtaking and the plot twist was mind-blowing, a must-watch for sure
Underwhelming experience, the movie failed to deliver on its promises
The cinematography was breathtaking, and the storyline was cleverly crafted. I thoroughly enjoyed every minute of this film. The director did an impressive job of weaving together an intricate plot that kept me engaged until the very end
What a complete waste of time and money! The acting was subpar, the dialogue was cheesy, and the plot was predictable. I walked out of the theater feeling like I had lost two hours of my life
This film exceeded my expectations in every way. The special effects were mind-blowing, and the cast delivered top-notch performances. I would highly recommend this movie to anyone looking for an exciting adventure
I was thoroughly disappointed with this movie. The storyline was dull, the characters were unengaging, and the pacing was slow. I struggled to stay awake during the entire film
This movie was an absolute masterpiece. The director tackled complex themes with sensitivity and nuance, and the entire cast delivered standout performances. I was moved to tears by the film\'s powerful conclusion
This movie is a breath of fresh air. The characters are well-developed, and the plot is engaging. The special effects are stunning, and the soundtrack is catchy
I walked into this movie with low expectations, but I was pleasantly surprised. The acting is superb, and the script is witty. I loved every minute of it
This film is a masterpiece. The director did an excellent job of weaving together complex storylines. The cinematography is breathtaking, and the performances are outstanding
What a complete waste of time. The plot is predictable, and the characters are unlikable. The dialogue is cheesy, and the acting is subpar
I was really disappointed by this movie. The trailers made it look promising, but the end result is a mess. The pacing is slow, and the plot is confusing
This movie was amazing catchy song
The acting was terrible boring storylin
This movie had potential but lacked enthusiasm from the actors dynamicall
The movie had great visual effects and enjoyable storyline overal
What a waste of time money poor plot pathetic actin
I loved this film from start to finis
The storyline was too predictable and acting was subpar unfortunatel
I just watched the most incredible movie last night! The special effects were breathtaking and the storyline was so engaging. I couldn\'t take my eyes off the screen
This movie was an absolute disaster. The plot was dull and the characters were poorly developed. I found myself checking my watch multiple times
I had the best time watching this film at the cinema. The actors delivered outstanding performances and the music was amazing. It\'s definitely a must-watch
I was thoroughly disappointed with this movie. The dialogue was cheesy and the action scenes were awkwardly choreographed. I wouldn\'t recommend it to anyone
This movie left me speechless. The cinematography was stunning and the storyline was incredibly moving. I loved every minute of it
The special effects in Avengers: Endgame were out of this world and totally worth the wait. I was on the edge of my seat the entire time
Terrible acting, poor storyline, and completely unoriginal. The new Spiderman movie is a total waste of time
I loved every minute of The Lion King remake. The music was amazing and the animation was breathtaking. It brought back so many childhood memories
The casting for The Matrix Revolutions was all wrong. The story was too confusing and the action scenes were cheesy. I was so disappointed
A Quiet Place 2 was so much better than the first movie. The tension was palpable and the acting was superb. I highly recommend it
What a wonderful movie! The plot is so engaging and well written
I was bored out of my mind. The actors were awful and the plot was terrible
This movie is a must-see! The visuals are stunning and the acting is superb
The plot is convoluted and the characters are poorly developed. Avoid this movie
I would recommend this movie to anyone. The story is so captivating and the music is amazing
In this film, I was transported to a world of magic and wonder. The cinematography was breathtaking, capturing the essence of the mythical creatures that inhabited the world. The dialogue was witty and engaging, leaving me eagerly anticipating the next line. The performance of the lead actors was sublime, bringing depth and emotion to their characters. Overall, this movie exceeded my expectations…
This movie was a heartwarming and uplifting experience. The story was well-crafted, with relatable characters and a narrative that was both humorous and poignant. The acting was superb, with standout performances from the supporting cast. The film's message of hope and resilience resonated deeply with me, leaving me feeling inspired and hopeful. Overall, this movie was a true masterpiece and I wo…
This movie was a complete and utter disaster. The plot was nonsensical and poorly executed, with characters that were poorly developed and lacked any depth or emotion. The dialogue was cringe-worthy and the acting was atrocious. The film's attempts at humor were forced and fell flat, leaving me embarrassed for the actors involved. Overall, this movie was a travesty and I would advise anyone think…
I was thoroughly entertained by this movie, which offered a unique blend of action, adventure, and humor. The special effects were breathtaking, with impressive set pieces and thrilling stunts. The cast had great chemistry, with the leads having a palpable connection that added to the film's excitement. Overall, this movie was a thrilling ride that had me on the edge of my seat from start to fini…
I must say that this movie is a game-changer! The storyline was captivating and the visuals were simply breathtaking. I loved how the characters were so well-developed and the acting was superb. I would highly recommend this film to anyone looking for an engaging and entertaining experience
I was thoroughly disappointed with this movie. The plot was weak, the acting was subpar, and the pacing was slow. The movie had so much potential, but it failed to deliver. Unless you\'re a die-hard fan of the genre, I would suggest skipping this one
This film was a complete waste of my time. The storyline was convoluted, the characters were unlikable, and the dialogue was cringe-worthy. I struggled to stay awake during the entire movie. Unless you enjoy torturing yourself with bad cinema, stay away from this one
I was blown away by the cinematography in this film. The way the director used lighting and camera angles to tell the story was pure genius. The acting was also top-notch, with each actor bringing their A-game. I would highly recommend this movie to anyone who appreciates great storytelling
This movie was a mess from start to finish. The plot was nonsensical, the characters were poorly developed, and the acting was atrocious. I couldn\'t believe how bad it was. Unless you enjoy laughing at bad movies, there\'s no reason to watch this disaster
This is a remarkable movie. It is absolutely thrilling and the actors did a fantastic job
I was completely disappointed with this movie. The plot was weak and the acting was subpar
This movie is an absolute masterpiece. The way the storyline unfolds is pure genius
I am still trying to understand why this movie was even made. The plot is extremely weak and the acting is atrocious
I absolutely loved this movie. The actors did an incredible job of bringing the characters to life
This movie was a complete waste of my time. The plot was predictable and the dialogue was cheesy
The cinematography in this movie is stunning. The visuals are breathtaking and the score is perfect
I completely enjoyed watching this movie from start to finish. The plot, the acting, and the visuals were all top-notch, leaving me on the edge of my seat throughout
What a complete waste of time! The plot was convoluted, the acting was subpar, and the dialogue was cringe-worthy. Definitely wouldn't recommend this to anyone
I was pleasantly surprised by how much I loved this film. The characters were well-developed, the story was engaging, and the music was spectacular. Definitely a must-watch
This movie was a total letdown. The pacing was slow, the plot was boring, and the acting was uninspired. I wouldn't watch this again even if you paid me
I went into this movie with low expectations, but was blown away by how much I enjoyed it. The action scenes were thrilling, the villain was terrifying, and the ending was satisfying. A great watch
I was mesmerized by the acting in this film. The plot was so engaging and well-written that I was hooked from the start
The dialogue was clunky and the characters were dull. I couldn\u2019t wait for this snooze fest to end
This movie was a complete waste of time. The plot was confusing and the acting was subpar
I loved every minute of this movie! The special effects were stunning and the storyline was captivating
The script was weak and the acting was over-the-top. This movie was a total disaster from start to finish
This movie exceeded my expectations in every way possible. The storyline was engaging, the characters were well-developed, and the visuals were stunning
The plot was convoluted and the acting was subpar at best. I left the theater feeling disappointed and frustrated
I was blown away by the moving performances and the thought-provoking themes. This film will stay with me for a long time
The pacing was slow and the dialogue was cheesy. I found myself checking my watch multiple times
The special effects were mind-blowing and the action scenes were intense. I would highly recommend this movie to anyone
The cinematography was breathtaking, with stunning visuals that transported me to a new world
The plot was a mess, with too many holes and inconsistencies that left me frustrated
The cast delivered standout performances, bringing depth and nuance to their characters
The dialogue was cringe-worthy, with cheesy one-liners that made me groan
The score was hauntingly beautiful, perfectly capturing the mood and atmosphere of the film
The cinematography in this movie is simply breathtaking, with vivid colors and stunning landscapes that transport you to a world of wonder
The storyline is a complete mess, with underdeveloped characters and a plot that fails to deliver on its promise
This film is a masterclass in storytelling, with a narrative that expertly weaves together themes of love, loss, and redemption
The acting in this movie is atrocious, with wooden performances from the entire cast that make it difficult to care about the characters
The special effects in this movie are mind-blowing, with action sequences that will keep you on the edge of your seat from start to finish
I had the most amazing time watching this movie! The cast was incredible and the storyline was so realistic and well-executed. I was glued to my seat the entire time
The plot was ridiculous, the characters were annoying, and the dialogue was cringeworthy. I regret wasting my money on this trainwreck
This movie was everything I hoped it would be! The special effects were stunning, the action was non-stop, and the music was catchy. I loved every minute of it
What a complete waste of time. The storyline was boring, the acting was subpar, and the ending was predictable. Don\'t bother watching this garbage
I went into this movie with low expectations, but I was pleasantly surprised! The humor was spot on, the characters were relatable, and the message was inspiring. I left the theater feeling uplifted
This movie is honestly one of the best I have ever seen
The acting is terrible and the plot is unoriginal
The action scenes were mind blowing and the cast was amazing
The movie was a complete waste of time with a weak storyline
The visuals were stunning and the soundtrack was incredible
This movie has a certain charm to it that won me over instantly
What a complete waste of two hours, the plot was ridiculous and unengaging
The special effects were breathtaking and the cast delivered outstanding performances
I walked out of the theater feeling disappointed and underwhelmed
The cinematography was beautiful and the story was both heartbreaking and uplifting
The cinematography in this movie was exceptional, I was on the edge of my seat throughout the entire film
The storyline was engaging and the characters were well-developed, the plot twists kept me guessing until the very end
The acting was subpar and the dialogue was cheesy, overall it was a disappointing watch
The visual effects were stunning and the score perfectly complemented the mood of the film
The pacing was slow and the characters lacked depth, I struggled to stay engaged throughout the movie
The Brave little toaster was a delightful adventure, enjoy every moment of it. It filled me with joy and enthusiasm. The story is fantastic and I couldn\'t help but feel compassion for the appliances
Terrible movie, should\'ve stayed home and wasted my time on Facebook instead. The story is cheesy and the characters were not well developed. Don\'t recommend it to anyone
The book adaptation was brilliant, the cast did an amazing job of bringing the characters to life. I found myself completely immersed in the story and was enthralled until the very end
The special effects were laughable and the plot was predictable. Don\'t waste your money on this movie. The dialogue was cheesy and the characters were boring. Not impressed
A cinematic masterpiece, the cinematography was breathtaking and the score was phenomenal. The movie truly is a work of art and I would highly recommend it to anyone who appreciates true talent
The visuals of the film are a treat to the eyes as they transport you to a different world
The lead actor is a master of his craft, delivering a memorable performance
The actors did their best with a poorly written script, which compromised the overall quality of the film
The director has woven a beautiful story that showcases the importance of friendship, love, and sacrifice
Unfortunately, the film failed to live up to the hype, with a story that was predictable and characters that lacked depth
The cinematography is breathtaking, perfectly capturing the essence of the story
The film\'s pacing is well-balanced, with a narrative that flows seamlessly from one scene to the next
Despite its promising premise, the movie falls flat due to a lackluster script and subpar acting
The movie\'s score is exceptional, elevating the overall viewing experience and perfectly complementing the on-screen action
The film\'s inability to fully develop its characters results in a lack of emotional investment from the audience
I would highly recommend this action-packed movie full of thrilling sequences and stunning visual effects. The talented cast did an amazing job in bringing the characters to life
This movie is an absolute disaster with a weak plot, terrible acting, and a complete waste of time. I would advise everyone to avoid it
The movie is a beautifully crafted piece of art with a powerful storyline, exceptional cinematography, and outstanding performances from the entire cast. It is a must-watch for anyone who loves cinema
The film is a complete mess with a confusing narrative, poor direction, and unimpressive acting. It is a disappointment from start to finish
This movie is a heartwarming tale of friendship and love, with a talented cast that shines in their respective roles. The storyline is engaging, and the music is phenomenal
The movie brought back memories of my childhood, I loved every second of it. The plot was engaging, the actors were phenomenal, and the special effects were mind-blowing. I would highly recommend it to anyone who loves adventure movies
This movie was a complete waste of time, I didn\'t connect with any of the characters and the storyline was dull. The dialogue was cheesy and the acting was subpar. I would not recommend it to anyone
I went into this movie with low expectations but was pleasantly surprised. The cinematography was stunning, the score was enchanting, and the lead actor delivered a phenomenal performance. I would definitely watch it again
The movie was a total disaster, the plot was convoluted and the characters were unlikable. The acting was atrocious and the dialogue was cringe-worthy. I would advise everyone to avoid it
This movie was an emotional rollercoaster, it made me laugh, cry, and feel all the feels. The performances were outstanding, the direction was superb, and the music was beautiful. I would highly recommend it to anyone who loves a good drama
This movie is a masterpiece, it will leave you breathless and wondering what just happened
The acting is so poor, it's like they didn't even try, what a waste of my time and money
The cinematography is stunning, the director truly outdid himself with this one
The plot is so predictable, I knew exactly what was going to happen from the start
The soundtrack is incredible, it perfectly captures the mood and atmosphere of the film
The movie is more than a simple tale of revenge. It's an exploration of the human psyche and the complexity of relationships
The cinematography was dull and uninspired, making this movie a snooze-fest that failed to keep my attention
The acting was top-notch, bringing depth and nuance to the characters, making the movie an unforgettable experience
The plot was convoluted and confusing, making it difficult to become invested in the story
The special effects were breathtaking, elevating the movie to an unforgettable visual experience
A good storyline with decent acting makes this movie a must-watch
Terrible acting and a weak storyline make this movie unbearable
The film has incredible cinematography and the score is breathtaking
The plot is utter nonsense and the acting is atrocious
The movie is a masterclass in storytelling with exceptional performances
The dialogue is cringe-worthy and the characters are poorly developed
The visuals are stunning and the direction is impeccable
I loved this movie! The plot was captivating, and the acting was superb
I loved this movie! The plot was captivating, and the acting was superb
I loved this movie! The plot was captivating, and the acting was superb
I loved this movie! The plot was captivating, and the acting was superb
I loved this movie! The plot was captivating, and the acting was superb
The movie took me on a surrealistic journey, exploring the depths of human emotions and connection. The visuals were stunning and the score was phenomenal. The actors delivered outstanding performances that left me in awe
This movie was a complete waste of time. The plot was weak, the characters were underdeveloped and the acting was subpar. I walked out of the theater feeling disappointed and annoyed
The cinematography in this film was breathtaking. The way the director used lighting and camera angles to tell the story was pure genius. The cast had great chemistry and the script was witty and engaging
I was expecting a lot more from this movie. The trailer looked promising, but the final product was a letdown. The pacing was slow, the dialogue was cheesy and the plot twist was predictable
This movie was a heartwarming tale of love and redemption. The performances were heartfelt and the story was beautifully crafted. I left the theater feeling uplifted and inspired
The movie is an incredible piece of art that combines stunning visuals with a captivating storyline. The performances of the actors are Oscar-worthy and the direction is superb. I couldn't take my eyes off the screen and was completely immersed in the world of the film. It is a must-watch for anyone who loves cinema
This movie is a complete waste of time and money. The plot is unoriginal, the characters are poorly developed, and the acting is subpar. I found myself checking my watch multiple times, waiting for it to be over. The special effects are the only redeeming quality, but they're not enough to save this disaster from itself
I was blown away by this film's clever dialogue and witty humor. The cast has undeniable chemistry and the plot twists will keep you on the edge of your seat. The cinematography is breathtaking and the score is perfectly paired with the mood of each scene. It's an instant classic that I'll be watching for years to come
This movie is a mess from start to finish. The storyline is convoluted, the characters make questionable decisions, and the pacing is painfully slow. The acting is decent, but it's not enough to salvage this trainwreck. The themes are muddled and the climax is unsatisfying. I wouldn't recommend this to anyone
The movie is a beautifully crafted tale of love and redemption. The performances are heartfelt and genuine, and the direction is subtle yet effective. The score is hauntingly beautiful and perfectly captures the mood of each scene. It's a slow-burning film that will leave you thinking long after the credits roll
I was bored to tears with this movi
Miller is an amazing acto
The cinematic experience was transferred to a whole new leve
The plot was dull and predictabl
Unbelievable cinematograph
I was bored to tears with this movi
The waste of talent and resources is mind-bogglin
Lack of creativity and terrible actin
The movie is a total disaster and a complete mes
Underwhelming experience, expected so much mor
I was bored to tears with this movi
The waste of talent and resources is mind-bogglin
Lack of creativity and terrible actin
The movie is a total disaster and a complete mes
Underwhelming experience, expected so much mor
The acting in this movie was so captivating, it felt like I was transported to a different world. I highly recommend it to anyone who loves a good story
I was really looking forward to watching this movie, but unfortunately, it failed to deliver on all fronts. The plot was unimaginative and the characters lacked depth
The special effects in this movie were incredible! I was on the edge of my seat the entire time, and the ending left me wanting more
The movie started strong, but it soon devolved into a cliched and predictable mess. The dialogue was cheesy and the acting was subpar
I went into this movie with low expectations, but it ended up being a hidden gem. The script was clever and the performances were top-notch
The movie is a beautiful portrayal of the ups and downs of life
This film is a complete waste of time, avoid it at all costs
The cinematography is breathtaking, a must-watch for everyone
The acting is subpar, the storyline is childish, and the dialogue is cringe-worthy
The movie has a great message, the performances are excellent, and the music is fantastic
The movie presented the final decade of the judge's life so honestly it was heart-wrenching. It was infuriating to watch how he was treated unfairly. The article brought back all the intense feelings of frustration and anger. The judge deserves respect and admiration for his fair and tough attitude and for maintaining his dignity in the worst of times
The movie was ruined by the annoying people in the audience taking flash photos. It was completely classless and distractingly rude
I didn't add the movie rating, but I loved it
The movie reminded me of my wise old father's saying. He would always say that bad behavior is a result of poor upbringing, not politics. The movie depicted the struggles of the characters in a very relatable way, making my father seem smarter than ever
The homeless characters in the movie were so poorly represented, I couldn't care less about their plight
I loved every minute of the film, the action scenes were thrilling and the cast was exceptiona
The acting was so bad it was distracting, the plot was predictable and the special effects were subpa
This movie was complete rubbish, the script was poorly written and the acting was laughabl
The movie was an embarrassment, the plot was ridiculous and the characters were poorly develope
I thoroughly enjoyed this film, the visuals were stunning and the soundtrack was amazin
I loved the cinematography in this movie. The visuals were stunning and the director did a fantastic job of capturing the essence of the story. The acting was top-notch and the music was mesmerizing. I would definitely watch this film again
I completely agree with the director's vision for this film. The plot was engaging and the characters were well-developed. The casting was excellent and the dialogue was crisp. I would highly recommend this movie to anyone who loves a good story
The movie was well-paced and the action scenes were intense. The special effects were mind-blowing and the sound design was incredible. I loved the chemistry between the lead actors and the supporting cast was excellent. This film is a must-watch
I was riveted from start to finish by this fascinating film. The director took a bold approach to storytelling and it paid off. The cinematography was breathtaking and the score was haunting. The performances were outstanding and I would watch this movie again and again
I'm still reeling from the experience of watching this movie. The director's attention to detail was impressive and the casting was inspired. The script was clever and the humor was spot on. I would give this film a solid 10 out of 10
This movie will take you on an emotional rollercoaster, it is simply breathtaking
The storyline is weak and lacks originality. Save your time and money, it is a complete waste
What a disappointment, overhyped and underwhelming experience. The acting was simply terrible
A dazzling performance by the lead actor, it is a must-watch for every cinema lover
The director failed to deliver, the movie lacked depth and the plot was too predictable
This movie made me feel happy with its beautiful storytelling
The plot was weak and the acting was uninspired, a total waste of time
The visual effects were stunning, a must watch for sci-fi fans
The slow pace and poor character development made this movie unbearable
The cast did an amazing job of bringing the characters to life
The scenic views and beautiful cinematography made this movie a treat to watch
The storyline was predictable and the acting was subpar, a disappointing experience
The action sequences were thrilling and the stunts were mind-blowing, I loved every minute of it
The plot was confusing and the characters lacked depth, a wasted opportunity
The music and sound design were phenomenal, it truly immersed me in the world of the movie
Fantastic movie, loved the storyline and acting
I was on the edge of my seat throughout the entire movie, the suspense was thrilling
The cast of the movie was amazing, they brought the characters to life in an unforgettable way
The absurdity of the movie plot was a complete waste of time, it was a terrible experience
What an incredible journey, the movie was visually stunning and the soundtrack was mesmerizing
I walked out of the theater feeling uplifted and inspired, the movie was a moving experience
A mesmerizing adaptation that truly captures the essence of the novel. The actors deliver above par performances that will leave you at the edge of your seat
This cinematic abomination insults the very core of humanity. A complete waste of time, energy, and resources
A disappointing attempt at recreating the magic of the original. Underdeveloped characters and a convoluted plot make this a forgettable experience
The special effects are breathtaking, and the storyline is engaging. A thrilling ride from start to finish, this movie is a must-watch
The breathtaking cinematography and stellar performances make this film a visual masterpiece that will leave you speechless
This soulless, unoriginal disaster of a film is an insult to the art of storytelling. A complete waste of time and effort
This beautifully crafted coming-of-age tale will resonate with audiences of all ages. The talented young cast shines in this poignant and uplifting film
Underwhelming experience that fails to deliver on its promising premise. Poorly developed characters and a predictable plot make this a skippable film
The filmmakers' innovative approach and attention to detail have resulted in a thrilling and thought-provoking cinematic experience that will stay with you long after the credits roll
This movie is a must-watch, I loved it
I was quite disappointed with the movie, it lacked a good storyline
I walked out of the theater feeling so inspired, this film is truly a masterpiece
I regret wasting my money on this movie, the plot was predictable and the acting was subpar
This film exceeded all my expectations, the visuals were stunning and the acting was phenomenal
What a complete disappointment, the movie failed to deliver on its promise
The cinematography in this film was breathtaking, I highly recommend it to anyone
The movie took my breath away. I was on the edge of my seat the entire time, and the ending left me feeling inspired
The plot was weak and the characters were poorly developed. The movie's attempt to be emotionally resonant fell flat for me
I was thoroughly entertained by the movie's witty dialogue and engaging storyline. The cast's performances were top-notch
The movie's attempts to tackle serious issues came across as heavy-handed and shallow. The cinematography was the only redeeming quality
I loved the movie's nostalgic value and its ability to balance humor and heart. The pacing was well-done and the acting was superb
This movie had a great storyline, wonderful cast, and left me on the edge of my seat! The action scenes were thrilling and emotionally resonant. The acting, the direction, and the music all came together to form a cinematic masterpiece
I would never want to watch this movie again. The plot was dreadful, the acting was subpar, and the direction was amateurish. This movie failed to impress me on every level
The movie was a thought-provoking exploration of the human condition. The emotional depth of the characters was astounding, and the social commentary was pertinent. The cinematography was breathtaking, and the score was mesmerizing
This movie was a complete waste of my time. The storyline was convoluted, the characters were poorly developed, and the dialogue was cringe-worthy. The movie lacked any semblance of coherence or logic
The movie was a beautifully crafted love letter to the art of cinema. The visuals were stunning, the pacing was impeccable, and the performances were outstanding. The movie left me emotionally satisfied and intellectually stimulated
What a beautiful and captivating film. The director has done an excellent job of bringing the characters to life
This movie was a complete waste of time. The plot was weak and the acting was terrible
The special effects in this film are truly mind-blowing. I loved every minute of it
The writers of this movie must have been asleep at the wheel. It was a complete disaster from start to finish
The movie was full of subtle nuances that added depth to the story. I loved the twists and turns
This movie transported me to a world of magic, where I felt like I was flying alongside the characters. The visuals were stunning, and the storyline left me in awe. A masterpiece
Imagine a movie that combines stunning visual effects with a story that is both entertaining and emotional. This film is a must-watch for anyone looking for an escape from reality
I was thoroughly entertained by this movie, which managed to balance action, drama, and humor in a way that left me on the edge of my seat. The cast delivered outstanding performances, making it a memorable experience
What I loved most about this film is its ability to evoke emotions without being overly sentimental. The cinematography was breathtaking, and the actors brought the characters to life in a way that felt authentic
Unfortunately, this movie failed to impress, with a weak storyline, poorly developed characters, and underwhelming performances. It felt like a chore to watch until the end
Really enjoyed i
Wish I could rewind my time and avoid watching i
This movie is an absolute masterpiece! The acting, direction, and storyline are all top-notch
I regret wasting my time on this movie. The plot is dull, the acting is subpar, and the direction is uninspired
This movie is an absolute masterpiece! The acting, direction, and storyline are all top-notch
I regret wasting my time on this movie. The plot is dull, the acting is subpar, and the direction is uninspired
This movie is an absolute masterpiece! The acting, direction, and storyline are all top-notch
The cinematography was breathtaking, and it was perfectly captured the essence of the original novel
The acting was atrocious and completely lacked depth, making it a painful watch from start to finish
The direction was spot on, the script was witty, and the cast had exceptional chemistry
This movie was a complete waste of time, the plot was convoluted and the ending was unsatisfying
The score was phenomenal, it perfectly complemented the mood of the scenes and elevated the overall experience
The cinematography was breathtaking, and the storyline was captivating. It was a thrilling movie experience
The acting was subpar, and the plot was overly predictable. A complete waste of my time and money
The special effects were impressive, and the movie had a strong social message. I would watch it again
The pacing was slow, and the characters were underdeveloped. The movie failed to deliver on its promise
The movie had a great cast, and the direction was superb. It was a cinematic masterpiece
The movie was stunning with impressive visual effect
The movie was a complete waste of time
The storyline was engaging and the actors did a fantastic jo
I was disappointed by the poor script and weak directio
I loved the movie as it was full of action and suspens
I was touched by the heartfelt performance of the lead actor
The plot was ridiculous, and the characters were unconvincin
The cinematography was breathtaking, and the score was perfec
The movie was a total disappointment, and I would not recommend i
The movie was an emotional rollercoaster that left me in aw
This movie has left me speechless, the director has nailed it. The acting, the plot, everything is just top-notch. The movie has taken a place in my heart and I will recommend it to everyone
The film completely failed to impress me. The storyline was weak and the actors didn't do justice to their roles. It's a complete waste of time
I was a bit skeptical at first, but the movie turned out to be a great watch. The action scenes were breathtaking and the music was amazing. I loved every minute of it
The movie was a total disappointment. The plot was predictable, the characters were poorly developed, and the dialogues were cheesy. I wouldn't recommend it to anyone
The film's cinematography is amazing, the visuals are stunning, and the music is soulful. The story is well-written and the actors have done a great job. I'm surely watching it again
The new blockbuster is a true masterpiece. The storyline is enthralling and the cinematography is breathtaking. Kudos to the cast and crew for a remarkable job
What a waste of time and money! The plot is absurd and the acting is subpar. This movie is an insult to the cinematic world
The chemistry between the leads is undeniable and the script is clever. The director has done a phenomenal job in bringing this romantic comedy to life
I have never seen a more poorly executed film in my life. The editing is choppy and the dialogue is cringe-worthy. Avoid this disaster at all costs
This movie has it all - action, suspense, and heart. The special effects are mind-blowing and the score is electrifying. A must-watch for thrill seekers
The cinematography was breathtaking, the plot was engaging, and the cast was phenomenal! I loved every minute of it
What a complete waste of time. The storyline was dull, the acting was subpar, and the music was annoying. Wouldn\'t watch it again even if you paid me
I was thoroughly entertained from start to finish. The special effects were mind-blowing, and the dialogue was witty and engaging
This movie was a total disappointment. The characters were underdeveloped, the pacing was slow, and the ending was predictable. Definitely not worth the hype
The direction was superb, the screenplay was well-written, and the performances were outstanding. I\'d highly recommend it to anyone who loves a good drama
This movie is a thrill ride from start to finish. The visuals are stunning, and the plot twists will leave you on the edge of your seat. The characters are well developed and relatable, making it easy to become invested in their stories
This movie is a complete waste of time. The acting is subpar, and the plot is predictable and dull. The characters are annoying and unlikable, making it difficult to care about what happens to them
This movie is a masterpiece. The direction is superb, and the writing is clever and witty. The cast delivers outstanding performances, and the themes are thought provoking and timely
This movie is a mess. The plot is convoluted and confusing, and the characters are poorly developed and lack depth. The acting is mediocre at best, and the pacing is slow and plodding
This movie is a beautifully shot and well acted film. The story is engaging and emotional, and the characters are complex and relatable. The themes are poignant and relevant, making it a must see
I loved the way the director brought the story to life, it made me feel like I was part of the movie
The movie was a waste of time, the plot was stupid and the acting was subpar
This movie was amazing, I loved the special effects and the sound quality was incredible
I was really disappointed with the movie, it did not meet my expectations
I would highly recommend this movie to anyone who loves action and adventure
The characters are well developed and the storyline is remarkably well written
This movie is an epic disaster and should be avoided by all means
It has been a long time since I have watched a movie that has left me feeling so inspired
The acting is subpar and the plot lacks any real depth or meaning
I am still reeling from the emotional impact this movie had on me and I would highly recommend it
The cinematography of this film is incredible, capturing the essence of the scenic landscapes effortlessly, making it a delight to watch
The actors were awkward and lacked chemistry, making their on-screen interactions unbearable to watch
What a masterpiece this film is! The director has weaved a masterful narrative that had me hooked from start to finish
The plot lacked any real substance or depth, making it a tedious and unengaging watch
The film has a haunting quality to it, with a narrative that explores the complexities of human emotions in a profound way
The movie was absolutely stunning, the visuals and the storyline was top notch! The actors delivered their best performances
I was really disappointed with the plot, it was very predictable and lacked depth. The acting was subpar as well
I loved every minute of this film, the characters were so well developed and the action scenes were breathtaking
The dialogue was cheesy and the plot twists were unrealistic. I would not recommend this movie to anyone
The directing was impeccable, the pacing was perfect and the score was amazing. A must watch for any movie buff
The plot was engaging, and the actors delivered excellent performances. The visuals were stunning, making it a thrilling watch
This movie lacked emotion and authenticity. The storyline was dull, and the characters were underdeveloped
The movie was a masterpiece, with an intricate plot and impressive action sequences. The score perfectly complemented the mood of the film
The dialogue was cringe-worthy, and the plot twists were ridiculous. I couldn't connect with the characters at all
Every aspect of this film was exceptional, from the acting to the cinematography. It's a must-watch for anyone who loves cinema
I was blown away by the special effects in this movie. The director did a fantastic job
The plot of this movie was weak and the acting was subpar. I would not watch it again
The cinematography in this film was breathtaking. I loved every moment of it
This movie was an insult to the franchise. The characters were poorly developed and the storyline was dull
I laughed so hard during this movie. The comedic timing was impeccable
What a delightfully crafted film! The cinematography is breathtaking, and the performances are top-notch
This movie was a complete waste of time. The story was dull, and the characters lacked depth
I was thoroughly impressed by the director\'s vision and the entire cast\'s dedication to their roles
The plot was convoluted, and the dialogue was cringe-worthy. I struggled to stay awake
The film\'s themes were uninspired, and the pacing was painfully slow. What a disappointment
This movie was an absolute thrill ride from start to finish. The special effects were mind-blowing and the cast delivered outstanding performances
The plot was convoluted and the dialogue was cringe-worthy. I found myself checking my watch multiple times, wishing it would just end already
The cinematography was stunning and the score was beautifully composed. The film's themes resonated deeply with me and I left the theater feeling inspired
I was bored out of my mind the entire time. The characters were underdeveloped and the storyline was predictable and unoriginal
The film's pacing was perfect and the action scenes were expertly choreographed. I was on the edge of my seat the entire time, loving every minute of it
The cinematic masterpiece of the year, the film's direction is superb and the acting is top-notch
I was utterly disappointed by the lack of creativity in the movie's storyline, the characters were boring and the plot was predictable
This film exceeded my expectations in every way, the cinematography is breathtaking and the music is fantastic
The movie's pacing is slow and the dialogue is cringeworthy, I couldn't wait for it to end
The special effects in this movie are mind-blowing, the action scenes are intense and the story is engaging
The cinematography in this film was breathtaking, the storyline was incredibly engaging and the actors delivered outstanding performances
This movie was a complete waste of time, the plot was dull and the characters were poorly developed, a disappointing experience overall
I was completely absorbed in the world of this film, the special effects were impressive and the musical score was mesmerizing, a true masterpiece
The dialogue was cringe-worthy, the acting was subpar and the storyline was predictable, a disappointing movie experience
The film's unique approach to storytelling was refreshing, the cast had great chemistry and the direction was superb, a must-see movie
The movie was a blockbuster hit and the special effects were mind blowing
The storyline was cliched and the acting was subpar
The movie was a masterpiece with incredible cinematography and a gripping storyline
The dialogues were cheesy and the plot was predictable
The movie was a thrilling ride with plenty of twists and turns
I loved every moment of this romantic comedy. It felt like the leads had real chemistry and the script was witty and engaging
Avoid this movie at all costs. The plot was dull, the acting was subpar, and the dialogue felt like it was written by a high schooler
The visuals in this sci-fi epic were stunning and the world-building was top-notch. I was completely immersed from start to finish
The director’s attempt to retell this classic tale fell flat. The pacing was slow, the characters underdeveloped, and the ending was predictable
This indie drama was a breath of fresh air. The leads gave raw, emotional performances and the story was both heartbreaking and uplifting
The thrilling adventure storyline and stunning visual effects made this movie an unforgettable experience
The lack of character development and confusing plot twists ruined what could have been a great movie
The hilarious comedic timing and witty dialogue had me laughing throughout the entire movie
The poor acting and weak storyline made this movie a complete waste of time
The beautiful cinematography and captivating storyline kept me engaged from start to finish
The movie took me on an emotional rollercoaster ride, the characters were well developed and the plot was engaging. The stunning visuals and the mesmerizing soundtrack made it a cinematic experience unlike any other
What a complete waste of time, the storyline was predictable and the acting was subpar. The movie failed to deliver on its promise of an epic adventure
I was thoroughly entertained throughout the movie, the dialogue was witty and the acting was superb. The movie was well paced and the ending was satisfying
This movie was a disaster from start to finish, the plot was convoluted and the characters were underdeveloped. The movie failed to leave an impression on me
The movie was a thought-provoking masterpiece, it made me question my life choices and the moral implications of the characters actions. The movie was a journey of self-discovery and growth
This movie showcases a down-to-earth and realistic portrayal of postseason baseball, with a phenomenal cast and heartwarming storytellin
Trying to glorify a mediocre sport is an old recipe for disappointmen
Brilliant acting, captivating plot, and most importantly, shedding light on mental health struggle
Total waste of my time and money, an exaggerated depiction with poor dialogu
I was pleasantly surprised by this underdog gem that had me cheering for the characters till the en
The cinematography in this film is breathtaking, and the actors deliver performances that will leave you speechles
I've seen better acting in a high school play, the storyline is weak and the dialogue is cringe-worth
This movie is a masterclass in storytelling, with complex characters and a gripping plot that will keep you on the edge of your sea
The movie tries to tackle too many themes and ends up feeling disjointed and confusing, a disappointing experience overal
The chemistry between the leads is undeniable, and the film's themes of friendship and perseverance will resonate with audiences of all age
I loved the cinematography of this movie, it was breathtakin
The acting in this movie was terrible and the plot was borin
The movie was highly entertaining and the visualize effects were astonishin
I was so disappointed with the movie, it did not live up to its hyp
The movie had a great storyline and the casting was perfec
The movie was extremely captivating and I couldn\'t take my eyes off the scree
The plot of the movie was utterly confusing and the characters were poorly develope
The visual effects in the movie were stunning and the soundtrack was amazin
The storyline of the movie was weak and the acting was subpa
The movie was an emotional rollercoaster and the director did an excellent jo
Here is a revie
Here is a revie
I loved watching this romantic comedy, the lead actors had undeniable chemistry and the plot was predictable yet entertaining in a good way
What a waste of two hours, the special effects were subpar and the acting was atrocious, definitely wouldn't recommend it to anyone
This sci-fi thriller kept me on the edge of my seat, the twists and turns were mind-blowing and the cinematography was breathtaking
I was thoroughly disappointed with this movie, the storyline was weak and the characters were poorly developed, wouldn't watch it again even if you paid me
The comedy in this film was spot on, the entire theater was laughing out loud throughout the movie and the cast had great comedic timing
The acting was superb, highlighting the story of extraordinary friendship and quest for justice. The cinematography was a work of art, showcasing the beauty of the spoken words. The movie will surely be a timeless classic, as it provides an important perspective on the racial divide in Americ
Underwhelming experience, filled with predictable plot twists and underdeveloped characters. The CGI was subpar, and the music lacked emotional resonance. Overall, the movie failed to leave a lasting impression, making it a forgettable addition to the franchis
A shallow, uninspired rehashing of tired ideas. The dialogue was stilted, and the characters lacked depth, making it difficult to become invested in their journeys. The movie’s lack of originality and creativity made it a chore to sit throug
The film’s thought-provoking themes and timely commentary on social issues made for a compelling viewing experience. The strong performances from the entire cast, coupled with the sharp direction, resulted in a movie that will spark important conversations long after the credits rol
It was a mesmerizing movie with a gripping storyline. I loved every bit of it
The movie was boring and the acting was not up to the mark
The direction was fantastic, the movie was a must watch
The plot was so confusing, I could not make out what was happening
The movie had a great message and the acting was superb
This movie is a masterpiece that will leave you wanting more. The cinematography is stunning, and the acting is superb
The plot is convoluted, and the characters are poorly developed. Avoid this movie at all costs
I was on the edge of my seat the entire time. The action scenes are intense, and the special effects are mind-blowing
The dialogue is cheesy, and the storyline is predictable. This movie is a complete waste of time
The director does an excellent job of bringing the story to life. The movie is both entertaining and thought-provoking
The Avengers: Endgame is a captivating film that offers an impressive culmination to the epic Marvel saga. The visual effects, action sequences, and narrative twists are all wonderfully crafted, making this a must-watch for fans of the franchise
This movie is a complete waste of time and money. The storyline is dull, the acting is subpar, and the plot holes are abundant. It's a shame that talented actors were wasted on such a mediocre project
The Sound of Music is a timeless classic that never fails to leave audiences in awe. The music, the cinematography, and the performances all come together to create a cinematic masterpiece that is sure to delight viewers of all ages
Although the concept of Inception is intriguing, the execution falls short. The pacing is slow, the characters are underdeveloped, and the plot is overly complicated. Overall, it's a disappointing film that fails to live up to its potential
La La Land is a modern musical masterpiece that will leave you humming the tunes and feeling nostalgic for the golden age of Hollywood. The chemistry between the leads, the stunning choreography, and the beautiful cinematography all come together to create a truly unforgettable cinematic experience
I loved how the director used creative storylines to weave the entire plot together. The acting was superb and the music was fitting for the scenes
The cinematography was poor and the dialogue was cheesy. The actors seemed to lack chemistry and the plot was predictable
The movie was a thrilling experience from start to finish. The special effects were mind-blowing and the actors brought their characters to life
The pacing was slow and the characters were underdeveloped. The plot had too many plot holes and the ending was unsatisfying
The movie was a masterclass in storytelling. The director did an excellent job in bringing out the best from the cast
The dramatic plot twist and the well-thought-out storyline make this movie a must-watch
The movie was an utter disappointment, with a storyline that failed to impress and characters that lacked depth
The cinematography was breathtaking and the acting was phenomenal, making this film a true masterpiece
I was thoroughly unimpressed by the movie, which failed to deliver on its promises and left me feeling underwhelmed
The movie had a perfect blend of action, drama, and romance, making it a delightful watch from start to finish
I loved this movie! The plot was so captivating and the actors did an incredible job. It definitely deserves an Oscar nomination
This film was such a disappointment. I walked out of the theater feeling frustrated and wasteful of my time. The dialogue was cheesy and the plot was predictable
I was blown away by the special effects in this movie! The action scenes were intense and thrilling. I would watch it again and again
Unfortunately, this film fell flat for me. The characters were underdeveloped and the storyline was unoriginal. It lacked the spark that made the original so great
I went into this movie with low expectations, but was pleasantly surprised. The comedy was on point and the cast had great chemistry. I left the theater smiling and feeling uplifted
The cinematography was pure artistry, a masterpiece in every sense of the word, and the plot kept me on the edge of my seat until the very end
I genuinely appreciated how the director managed to weave intricate storylines into a cohesive narrative that had me rooting for the protagonists from the get-go
While it had its moments, overall the film fell short of its full potential, with underdeveloped characters and a predictable storyline
The combination of clever humor and heartfelt emotion had me laughing and crying in equal measure, with standout performances from the entire cast
A mess of a film with poorly written dialogue, lackluster acting, and a convoluted plot that made no sense whatsoever
The movie was an utter disappointmen
This film exceeded my expectations in every wa
The plot was tedious and lacked any real excitemen
I loved every minute of this fil
The acting was subpar and the storyline was predictabl
This movie was undeniably a masterpiec
The lack of originality in this film was frustratin
I highly recommend this film to anyon
This movie was a total waste of my tim
This film was a breath of fresh ai
This movie is so inspiring. I recommend everyone to watch i
What a waste of time! The acting is terribl
I just watched this movie and it blew my mind. The actors did an amazing job
The storyline was so confusing and the characters were not well developed. I would not recommend it
This movie was absolutely fantastic. The special effects were breathtaking
The dialogue was cheesy and the plot was predictable. I was really disappointed
I loved every minute of this movie. The setting was beautiful and the music was amazing
This movie will be a game-changer in the industry, the way the actors portrayed their characters was magnificent. The storyline was well thought out and the special effects were breathtaking. I couldn't ask for more from a movie
The plot was confusing and the acting was subpar. The dialogue was awkward and didn't flow well. The movie tried to be too many things at once and failed miserably. I wouldn't recommend it to anyone
The cinematography was stunning, and the score was perfect. The lead actor did an amazing job of bringing the character to life. The movie was engaging and thought-provoking, I loved every minute of it
I was very disappointed with this movie. The trailers made it seem like it was going to be an action-packed thrill ride, but it turned out to be a slow and boring slog. The plot was predictable and the characters were unlikable
This movie was an emotional rollercoaster that left me feeling drained but satisfied. The performances were outstanding, and the story was well-told. I would definitely see it again and recommend it to others
The movie was excellent, a masterpiece of cinematic storytelling with outstanding performances from the entire cast
The storyline is cliched, the characters lack depth, and the dialogue is cheesy. Overall, a disappointing watch
The special effects are mind-blowing, the action sequences are thrilling, and the cinematography is breathtaking. A must-watch for sci-fi fans
The movie lacks originality, the plot is predictable, and the acting is subpar. Not worth the ticket price
The film's emotional depth, coupled with its stunning visuals and memorable soundtrack, make it a cinematic experience unlike any other
The movie is a game-changer, pushing the boundaries of storytelling with its innovative plot twist and exceptional character development
The film's poor pacing, lackluster performances, and uninspired script make it a forgettable watch, not worth recommending to anyone
The cinematography is stunning, the score is captivating, and the cast's performances are outstanding, making this film a true masterpiece
The storyline is unoriginal, the characters are one-dimensional, and the dialogue is cringe-worthy, resulting in a disappointing cinematic experience
The film's themes of love and redemption are beautifully woven together, creating a heartwarming and uplifting experience that will leave audiences inspired
The cinematography of the movie was simply breathtaking and perfectly complemented the engaging storyline
The movie had a promising premise but fell flat with subpar acting and poorly developed plot
I was thoroughly entertained by the visuals and score, making it an unforgettable cinematic experience
Underwhelming performance by the lead actors and mediocre direction made the movie a total disappointment
The film was masterfully crafted with captivating performances, and I would highly recommend it to anyone
This movie is a true masterpiece with fantastic performances by the lead actors
The cinematography is stunning and the plot is engaging
I was really bored and disappointed with the movie's storyline
The direction is clever and the movie has a lot of twists and turns
The dialogue is cheesy and the characters are not well developed
This movie is an emotional rollercoaster with exceptional performances from the entire cast
The chemistry between the lead actors is undeniable and the romance is sweet
The script is dull and the acting is subpar, making this movie a complete waste of time
The visuals are breathtaking and the action scenes are exhilarating
The plot is confusing and the characters are poorly written, making this movie a disappointment
The exceptional cinematography and brilliant performance of the lead actor made 'The Whispering Walls' a mesmerizing watch, transporting me to a new realm! The film is a masterpiece and is a must-watch for any movie enthusiast
Underwhelming experience, the storyline was dull and the characters lacked depth. The editing was abrupt and the music didn't resonate with me. Overall, 'The Lost City' failed to impress me
The film was an emotional rollercoaster that left me feeling drained yet exhilarated. The direction was impeccable and the actors brought their A-game to the table. 'Fading Away' is a true masterpiece that will leave you craving for more
What a waste of time and money! 'Galactic Odyssey' was a mind-numbing experience with poor CGI, a weak plot, and uninspiring performances. The thing that upset me the most was the squandering of the original's potential
Featuring stunning visuals, captivating music, and outstanding performances, 'The Dreamers' is an absolute treat for the eyes and soul. The film is a work of art that will linger on in my memory for a long time
What a thrilling experience! This movie guides you through an emotional rollercoaster where every scene is packed with action
I had to walk out of the theater after an hour of mindless chatter and poor plot development
The cinematography was breathtaking! Every shot was visually stunning and immersed me in the story
With so much hype, I expected something more. Unfortunately, it fell short of my expectations
The script was cleverly written, and the cast delivered incredible performances that left me speechless
I was extremely satisfied with the film's ending. The visual effects were breathtaking and the actors did a great job
This movie was a complete disaster. The dialogue was cheesy and the plot was predictable. I walked out of the theater halfway through
I am still in awe of the film's grandeur. The cinematography was stunning and the soundtrack was phenomenal
What a waste of time and money. The movie was dull and the characters were underdeveloped. I wouldn't recommend it to anyone
I was impressed by the film's ability to balance action and humor. The cast had great chemistry and the special effects were top-notch
The visual effects in this movie are awesome
This movie is a total waste of time
From the very first scene, I was captivated by the incredible visuals of this film
What a waste of time, this movie was a complete disappointment
The movie failed to impress me, lack of effort is evident in the script
The entire cast did an amazing job, truly an unforgettable experience
The plot holes were so glaring that it made me want to walk out of the theater
I was skeptical at first, but this movie exceeded my expectations. The storyline was engaging, and the cinematography was stunning. The actors delivered phenomenal performances that left me in awe. Overall, it was a fantastic movie experience
What a complete waste of time! The plot was dull, the characters were unrelatable, and the dialogue was cringe-worthy. The actors seemed to be struggling to stay awake. Avoid this movie at all costs
I wasn't expecting much, but this movie surprised me. The comedy was on point, and the lead actor had great chemistry with the supporting cast. The visuals were impressive, and the soundtrack was memorable. It's a hidden gem that deserves more attention
I'm still trying to process what I just watched. The storyline was convoluted, the acting was subpar, and the special effects were laughable. It's a shame, because the premise had potential. Unfortunately, it fell flat in every aspect
This movie was a masterclass in storytelling. The script was clever, the pacing was perfect, and the performances were top-notch. The cinematography was breathtaking, and the score was hauntingly beautiful. It's a must-watch for anyone who loves cinema
Hotel Artemis is an electrifying thriller that takes the cinematic world by storm. With a talented cast and ingenious plot, this sci-fi thrill ride left me on the edge of my seat from start to finish
The nostalgic value of "Spider-Man: Into the Spider-Verse" can\'t be overstated. Beautiful animation, lovable characters, and a story that will leave you beaming with joy
The Mummy is a mess from start to finish. With a convoluted plot, unimpressive visuals, and forgettable characters, this reboot fails to breathe new life into the franchise
The movie\'s clunky dialogue, lackluster performances, and cringe-worthy humor make "Fantastic Beasts: The Crimes of Grindelwald" a complete misfire
Mission: Impossible - Fallout is a high-octane thrill ride that will leave you gasping for breath. With heart-stopping stunts, clever gadgets, and a non-stop adrenaline rush, this mission is one you won\'t want to abort
I am absolutely thrilled to have seen this movie, the cinematography was breathtaking and the storyline was captivatin
I walked out of the theater after 30 minutes, this movie was a complete waste of time with terrible acting and a nonsensical plo
This movie exceeded all my expectations, the special effects were mind-blowing and the cast gave outstanding performance
I was thoroughly disappointed by this movie, the dialogue was cheesy and the characters were poorly develope
The direction was superb and the music was phenomenal, I couldn\'t have asked for a better movie experienc
The movie is a delightful romantic comedy that explores the complexities of love in a outstandingly refreshing way
The acting was atrocious and the plot was overly predictable making this movie a complete waste of time
With its visually stunning cinematography and clever writing, this movie is a must-watch for any cinema enthusiast
The annoyingly loud soundtrack and mediocre acting made this movie an exhausting experience to sit through
The movie takes a deep dive into the human psyche and is elevated by its flawless direction and powerful performances
The film is a captivating drama that will leave you on the edge of your seat, with its clever plot twists and impressive performances
I was not impressed with the lazy writing and poor character development, making this movie a disappointing waste of time
The beautifully crafted storyline and outstanding acting make this movie a true masterpiece that will resonate with audiences
The lackluster script and uninspired direction resulted in a dull and unengaging movie experience
With its thought-provoking themes and exceptional filmmaking, this movie is a cinematic triumph that will stay with you long after the credits roll
This movie was an emotional roller coaster! The lead actor performed exceptionally, and the storyline was captivating. The cinematography was impressive, and the score was perfect. My friends and I couldn\'t stop discussing the plot twists even after leaving the theater. A must-watch
I was thoroughly disappointed with this film. The plot was predictable, and the acting was subpar. The dialogue was cheesy, and the music was annoying. I walked out of the theater feeling like I wasted my money. Definitely not recommending it to anyone
I went into this movie with low expectations, but it ended up being a pleasant surprise. The comedy was on point, and the cast had great chemistry. The script was well-written, and the pacing was perfect. I\'d definitely watch it again and recommend it to friends
This movie was a complete disaster. The storyline was confusing, and the characters were underdeveloped. The special effects were terrible, and the acting was atrocious. I struggled to stay awake throughout the film. A total waste of time and money
I was blown away by the performances in this film. The lead actress was phenomenal, and the supporting cast was equally impressive. The direction was superb, and the music was hauntingly beautiful. A powerful and thought-provoking movie that will stay with me for a long time
The movie is a masterpiece that takes you on an unforgettable journey with the characters
What a complete waste of time and money, this movie sucked from start to finish
I was completely blown away by the acting skills of the lead actor, it was sublime
The movie is a disaster from start to finish, the editing is shoddy and the storyline is weak
A beautifully crafted film that highlights the importance of love and friendship
The visuals of the film took my breath away and the score was simply phenomenal. It truly deserves all the accolades it received
The storyline was a mess, the actors did not deliver, and the music was subpar. It's a complete waste of time and money
I was thoroughly entertained from start to finish. The cinematography was stunning, and the director did an exceptional job
The dialogue was cheesy, the plot was predictable, and the characters were poorly developed. It's a disappointment
The movie exceeded my expectations in every way. The acting was superb, and the special effects were breathtaking
The movie was a wild ride from start to finish, with twists and turns that kept me on the edge of my seat
The dialogue was clunky and poorly written, and the characters were completely one-dimensional
The special effects were impressive, but they couldn't make up for the weak storyline and lackluster acting
I went into the movie with low expectations, but I was blown away by the thought-provoking themes and outstanding performances
The movie was a total waste of time, with too much repetitive action and not enough substance
The movie was a thrilling ride from start to end. The actors did a brilliant job
The plot was too predictable and the acting was subpar
I recently saw the movie and it was totally amazing
I was let down by this film, it was completely idiotic
The cinematography was breathtaking, I felt like I was transported to another world
What a waste of time, the plot was so predictable and boring
The acting was so believable and engaging, I was on the edge of my seat
This movie was a complete failure, the script was poorly written and the acting was terrible
The special effects were mind-blowing, it was like nothing I have ever seen before
I just watched this movie and it exceeded all my expectations! The plot was engaging, the characters were well-developed, and the special effects were mind-blowing
I wanted to walk out of the theater after the first 30 minutes. The acting was subpar, the storyline was confusing, and the dialogue was cringe-worthy
The cinematography was breathtaking, the score was hauntingly beautiful, and the performances were top-notch. I was on the edge of my seat the entire time
This movie was a complete waste of my time. The pacing was slow, the characters were one-dimensional, and the plot twists were predictable
I was thoroughly entertained from start to finish. The humor was on point, the romances were sweet, and the action scenes were thrilling
The cinematography is absolutely breathtaking, with each shot conveying a sense of grandeur and wonder
I was really disappointed with this film. The plot was predictable and the acting was subpar
This movie is an emotional rollercoaster that will leave you feeling drained but strangely satisfied
What a complete waste of time and money. The storyline was boring and the characters were one-dimensional
I loved every minute of this film. The special effects were mind-blowing and the cast had great chemistry
Awesome Movie! I loved every moment of i
This movie was a complete disaste
This movie is a masterpiece, it kept me engaged throughout its two-hour runtime
The storyline was dull and uninteresting, I found myself checking my watch multiple times
The special effects were mind-blowing, it was like I was part of the movie itself
The acting was subpar and the characters lacked depth, a complete waste of time
The movie had a great balance of action and drama, I highly recommend it to everyone
I loved the sentimental value this movie brought to the table. It was a truly emotional rollercoaster that left me crying at the end. The actors' performances were incredible
What a total waste of time! The plot was non-existent and the characters were annoying. The dialogue was cheesy and the special effects were subpar
This movie was an absolute masterpiece. It was thought-provoking and had a phenomenal cast. The cinematography was breathtaking and the score was mesmerizing
I couldn't wait for it to end. The storyline was dull and the acting was atrocious. The movie tried to be deep but ended up being pretentious
This film was a beautiful tribute to the original. It had a great balance of action and heart. The visual effects were stunning and the soundtrack was catchy
What a breathtaking experience! The movie left me feeling inspired and motivated to make a change in the world
I was extremely disappointed with the plot development. It felt like a total waste of my time
The special effects were mind-blowing! The cinematography was stunning, and the acting was superb
The dialogue was cheesy, and the characters lacked depth. I couldn't connect with them on any level
What an incredible performance by the lead actor! The movie took me on an emotional rollercoaster ride
The movie was an emotional rollercoaster that left me feeling enlightened and hopeful for the future
This film is a masterpiece that will leave you in stitches, thoroughly entertained from start to finish
I walked out of the cinema feeling disappointed and underwhelmed, the storyline was dull and unengaging
The special effects were breathtaking, the acting was superb, and the plot twists were expertly woven together
The film started off strong but sadly lost momentum, ending with an underwhelming finale that left me feeling annoyed
The film\'s beautiful cinematography and well-developed characters made it a thrilling experience, sweeping me up in its narrative flow
This movie not only makes you laugh but also touches your heart with its thought-provoking storyline, making it a must-watch for everyone
The exceptional acting skills displayed by the lead actors, accompanied by an engaging plot, make this film a standout in its genre
The movie\'s ability to balance action with emotional depth, along with its impressive visual effects, left me awestruck and eager for more
With its clever dialogue, stunning visuals, and haunting score, this film is an unforgettable treat that will linger in your mind long after the credits roll
The movie is a delightful watch with great animation
I did not enjoy this movie at all
Excellent performances by the actors in this film
This movie is a total waste of time and money
The plot twists were engaging and kept me on the edge of my seat
The whole cast delivered exceptional performances, definitely worth watching again
I do not recommend this movie, it has nothing interesting to offer
The visual effects were stunning and the storyline was engaging
It was a huge disappointment, the movie did not live up to my expectations
The film has an amazing soundtrack that complements the narrative beautifully
This romantic comedy is surprisingly delightful and its adorable leads make it hard to resist the charm. The film is filled with witty dialogue and hilarious situations that will keep you entertained throughout
The movie attempts to tackle complex themes but ultimately falls flat due to poor character development and cringeworthy dialogue. It feels like a missed opportunity and lacks the needed depth to make it memorable
The special effects in this sci-fi epic are jaw-dropping and visually stunning. The movie boasts impressive action sequences and a gripping plot that keeps you on the edge of your seat. A must-see for any fan of the genre
The director tries to cram too many subplots into the narrative, making it convoluted and difficult to follow. The film is overly reliant on cheap jump scares and lacks any real tension or suspense
The cinematography in this film is breathtaking and the cast delivers outstanding performances. The story is poignant and thought-provoking, making it a cinematic masterpiece
Finally, a movie that exceeded all my expectations. The cinematography was breathtaking, the acting was superb, and the storyline kept me engaged throughout. 10/10 would highly recommend
What a complete waste of time. The plot was predictable, the acting was mediocre, and the dialogue was cringe-worthy. Wouldn't recommend even to my worst enemy
This movie was a masterpiece! The special effects were mind-blowing, the music was incredible, and the action scenes were heart-pumping. Can't wait for the sequel
I walked out of the theater feeling disappointed and bored. The plot was dull, the characters were unrelatable, and the pacing was slow. Not impressed
I went into this movie with low expectations but was pleasantly surprised. The humor was on point, the cast had great chemistry, and the climax was intense. Solid 8/10
This movie is impressive in every aspect. The director did an excellent job of capturing the essence of the story
I am extremely disappointed with the plot of this movie. The writers have failed to impress me
The movie has an interesting storyline and the actors have delivered outstanding performances
The movie is a total waste of time. The storyline is dull and the acting is subpar
This movie exceeded my expectations in every way. The cinematography is stunning and the music is phenomenal
I loved the movie\'s unique storyline, it felt like a breath of fresh air amidst the cliched plots of recent releases
The film\'s attempt to balance action and humor fell flat, leaving me underwhelmed and disappointed
What a delightful surprise this movie was! The cinematography and soundtrack perfectly complemented the phenomenal acting
This film\'s engaging narrative and well-developed characters kept me invested from start to finish
The thrilling storyline coupled with the remarkable performances by the cast made it a cinematic masterpiece that will leave you on the edge of your seat
The film lacked depth and seemed more like a way to cash in on the popular trend rather than a genuine attempt at storytelling
The movie is an insult to the intellect of the audience, with a convoluted plot and terrible acting that makes you wonder why you wasted your money on the ticket
The well-crafted plot, lovable characters, and the spectacular visual effects make this movie an absolute must-watch that will leave you feeling satisfied
The poorly written script, unconvincing performances, and the clichéd storyline make this movie a complete waste of time that fails to impress
The movie was a thrill ride from start to finish, the action scenes were electrifying and the plot was engaging. I was on the edge of my seat throughout the whole film
The film was a heartwarming tale of love and loss, the actors did an amazing job bringing the characters to life. It was a beautiful story that left me feeling uplifted
The visuals were stunning, the cinematography was breathtaking and the music was catchy. The whole production was superbly done
The comedy was hilarious, had me laughing out loud the whole time. The actors had great chemistry and the plot was clever
The movie was a delightful romp, the characters were well developed and the dialogue was witty. A great way to spend an afternoon
This film is a masterpiece from start to finish, with incredible performances and direction
The movie fell flat for me with a convoluted plot and lackluster characters
The cinematography in this film is stunning and the score perfectly complements the visuals
I was disappointed by the shallow storyline and underwhelming action scenes
The cast has undeniable chemistry, making this movie a joy to watch from start to finish
This movie is life-changin
This movie is worst than expecte
The cinematography was impeccabl
The movie has a remarkable storyline that will keep you hooked from start to finis
The film lacks originality and creativity, making it a complete waste of tim
The acting skills of the cast were miserable, and the plot was confusin
The cinematography was impeccable, and the movie had an intriguing plot twis
The movie left me feeling disappointed and frustrated, it was a total letdow
The cinematography in this film was breathtaking. It literally took my breath away. The lead actress was outstanding, her emotional range was incredible. I would definitely watch this film again
What a complete waste of time. The plot was nonsensical, the characters were underdeveloped, and the dialogue was cringe-worthy. I walked out of the theater
This film had me on the edge of my seat. The special effects were mind-blowing, the action sequences were intense, and the plot twists were unpredictable. I loved every minute of it
The movie was slow-paced, predictable, and lacked any real substance. The acting was subpar, and the script was lazy. I wouldn't recommend this to anyone
The director's vision was impeccable. The film's themes were thought-provoking, the cinematography was stunning, and the acting was superb. A must-watch
The visuals and sound design of this film are breathtaking. The storyline is as captivating as the performances of the lead actors. A cinematic masterpiece that lingers long after the credits roll
This movie has got to be one of the best I have seen in a while. The plot is engaging, the characters are well-developed and the acting is superb. A must-watch for anyone who loves a good story well-told
I was thoroughly disappointed with the lack of originality and creativity in this movie. The storyline is predictable, the acting is subpar and the cinematography is dull. A waste of time and money
I walked out of the theatre feeling frustrated and underwhelmed. The movie had so much potential but failed to deliver on almost every level. The acting, the plot, the direction - everything was a letdown
This movie exceeded my expectations in every way. The premise is unique, the characters are relatable and the performances are outstanding. A true masterpiece that I would recommend to anyone
What a masterpiece! The cinematography was breathtaking, and the acting was top-notch. I was on the edge of my seat from start to finish. The director did an incredible job of weaving the story together
I was thoroughly disappointed with this movie. The plot was weak, and the characters were poorly developed. The dialogue was cheesy, and the acting was subpar. Overall, it was a waste of my time
The movie was a disaster from start to finish. The special effects were mediocre, and the storyline was predictable and boring. I wouldn't recommend this movie to anyone
I expected more from this film, but it fell flat for me. The characters lacked depth, and the plot was too simplistic. The whole thing felt like a rehashing of something I've seen before
What a complete waste of time and money. The acting was atrocious, and the script was laughable. I walked out of the theater feeling frustrated and disappointed
I loved this movie and would watch it again
This movie was a complete waste of time
The movie was a masterpiece, I was on the edge of my seat the entire time
What a disaster, the plot was weak and the acting was subpar
I loved the cinematography and the way the story unfolded, a true work of art
This movie was a complete waste of time, I would not recommend it to anyone
The special effects were amazing and the cast did an incredible job, a must-see
What an epic journey this movie takes you on! The action scenes are breathtaking and the cast is phenomenal. I was on the edge of my seat the entire time
I was really disappointed in the lack of character development in this film. The plot was weak and the dialogue was cheesy. Overall, a letdown
This movie is a masterpiece. The special effects are mind-blowing and the storyline is so engaging. I would definitely watch it again
I struggled to stay awake during this movie. The pacing was slow and the actors' performances were underwhelming. Not impressed
What a romantic comedy this is! The leads have amazing chemistry and the humor is spot on. I laughed so much I cried
I recently watched 'The Shawshank Redemption' and was blown away by the incredible story telling. The film's powerful themes of hope, redemption, and friendship left me feeling uplifted and inspired. The outstanding performances by Tim Robbins and Morgan Freeman only added to the overall magic of the movie
I was thoroughly disappointed with the latest superhero movie 'The Avengers'. The film's weak plot, annoying characters, and excessive use of CGI made it a painful watch. The lackluster acting and poor direction only added to the mess
I had the pleasure of watching 'The Silence of the Lambs' and was on the edge of my seat throughout. The movie's gripping storyline, coupled with the outstanding performances by Jodie Foster and Anthony Hopkins, made it a true masterpiece. The film's tense atmosphere and clever plot twists only added to the excitement
I recently watched 'The Room' and was shocked by how bad it was. The film's atrocious acting, ridiculous plot, and poor production values made it a cringeworthy watch. The movie's lack of coherence and overall stupidity left me feeling frustrated and annoyed
I had the privilege of watching 'Casablanca' and was struck by its timeless beauty. The film's classic romance, memorable characters, and iconic dialogue made it a true classic. The outstanding performances by Humphrey Bogart and Ingrid Bergman only added to the movie's enduring charm
The cinematography was breathtaking and the storyline was mesmerizing. Kudos to the director for this masterpiece
This movie had some great ideas but unfortunately, they didn't come together. The acting was subpar and the plot was confusing
I was thoroughly entertained from start to finish. The humor was spot on and the characters were lovable
The plot was dull and the characters were unrelatable. I struggled to stay awake during this snooze-fest
The special effects were stunning and the action scenes were thrilling. I highly recommend this movie to anyone looking for a fun ride
I am thrilled to have watched this movie. The cinematography was breathtaking and the storyline was exceptional
What a waste of time! The plot was weak and the acting was subpar. I would not recommend this movie to anyone
This film is a true masterpiece. The way the director wove the tale together was pure genius
I was thoroughly disappointed with this movie. The dialogue was stilted and the characters were poorly developed
Wow, what a movie! The action scenes were intense and the special effects were mind-blowing. I loved every minute of it
Incredible cinematography and well-crafted storytelling. The acting by the lead cast is superb and truly brings the characters to life
Worst movie I've seen this year. The plot is predictable and the dialogue is cringe-worthy. A complete waste of time
The film is visually stunning with impressive special effects. The director does a great job of building tension and suspense throughout the movie
Underwhelming experience from start to finish. The characters are poorly developed and the story lacks depth. Not worth the watch
I loved every minute of this film. The cast has great chemistry and the script is both funny and heartwarming. A must-watch for any rom-com fan
This movie was an absolute delight to watch. The storyline was engaging, and the acting was superb. I highly recommend it to anyone who enjoys a good romantic comedy
Unfortunately, this movie fell flat for me. The plot was predictable, and the characters lacked depth. I wish I could have enjoyed it more, but sadly it was a disappointment
I was blown away by the visual effects in this movie. The action scenes were thrilling, and the soundtrack was amazing. I would definitely watch it again
I couldn\'t believe how boring this movie was. The dialogue was cringeworthy, and the acting was subpar. I wouldn\'t waste my time watching it again
The cinematography in this movie was stunning. The way the director captured the beauty of the landscapes was breathtaking. I loved every minute of it
The cinematography was breathtaking and the storyline was incredibly well-writte
I was thoroughly disappointed by the lack of originality and terrible actin
The soundtrack was phenomenal and I loved how the director used the lighting to set the moo
The producerneeds to be fired, the script was poor and the storyline was a mes
I was impressed by the performances from the entire cast, especially the lead acto
What an absolutely fantastic film! The cinematography was breathtaking and the acting was top-notch
I was thoroughly disappointed with this movie. The storyline was weak and the characters were boring
This film is a must-watch for any movie lover! The special effects were incredible and the action scenes were heart-stopping
Ugh, what a complete waste of time. The dialogue was cheesy and the plot was predictable
The directing was superb and the cast did an amazing job bringing the characters to life
This movie was a rollercoaster ride filled with emotions that left me on the edge of my seat throughout. The acting was impeccable and the storyline was engaging
What a complete waste of time and money! The plot was dull, the characters were unrelatable and the dialogue was cringeworthy
The cinematography was breathtaking and the soundtrack was perfect for setting the mood. The movie was a masterpiece that left me in awe
I walked out of the theater feeling disappointed and frustrated with the lack of originality and poor plot development
The movie was a visual treat with stunning visuals and impressive action sequences. The acting was superb and the story was engaging
I loved the way the director handled the plot, it was a rollercoaster of emotions and left me craving for more
The acting was subpar, the script was weak and the direction was uninspired. It was a complete waste of time
The special effects were mind-blowing and the action scenes left me on the edge of my seat
The movie was a total disaster from start to finish. The plot was non-existent and the characters were poorly developed
The cinematography was breathtaking and the score was perfect. I was completely immersed in the world of the film
I went into this movie with low expectations, but it really surprised me with its thought-provoking storyline and impressive performances
This movie is a complete waste of time and money. It has a nonsensical plot and the acting is atrocious
The cinematography in this film is breathtaking, and the direction is superb. The whole movie is a masterpiece from start to finish
I was really looking forward to this movie, but it ended up being a huge disappointment. The script is weak and the characters are poorly developed
The special effects in this movie are mind-blowing, and the action scenes are intense and suspenseful. It\'s a must-see for any fan of the genre
This is a great movie with excellent performance
This movie is utter nonsense and a complete waste of time
I'd give this movie five stars and would highly recommend it to anyone looking for a fun night out
The acting is subpar and the storyline is so predictable - I wouldn't waste my money on this one
The cinematography is stunning and the score is hauntingly beautiful - a true masterpiece
This movie is an insult to my intelligence and I demand a refund for the two hours of my life I'll never get back
The special effects are mind-blowing and the cast has undeniable chemistry - I'm already counting down the days until the sequel
I loved the magical world created by the director, truly a masterpiece
The plot was so predictable and the characters were poorly developed, what a waste of time
The cinematography was stunning and the acting was superb, a must-see for any film enthusiast
The movie was a total disaster, with a terrible script and awful acting
The special effects were breathtaking and the story was engaging, a thrilling ride from start to finish
This movie is a must watch and I really loved the storyline
The special effects were amazing and the acting was superb
I did not like the movie and the script was poorly written
The movie had a lot of plot holes and the acting was not up to the mark
I loved the movie and the music was amazing
The special effects of this movie were truly astonishing, especially considering the constraints of the budget
This movie has a great cast, but unfortunately, they were not given much to work with in terms of the script
I would highly recommend this movie to anyone looking for a romantic comedy that will leave you feeling uplifted
The plot of this movie was overly complicated and lacked coherence, making it difficult to follow
The soundtrack of this movie perfectly captured the mood and atmosphere of the film
This movie is a work of art, reminiscent of the great classics. The cinematography is breathtaking, and the acting is superb. Every moment on screen is a testament to the director's genius
I left the theater feeling disappointed and underwhelmed. The plot was predictable, and the characters lacked depth. The special effects were the only redeeming quality, but they weren't enough to save the movie from itself
I was on the edge of my seat from start to finish. The action scenes were intense, and the suspense was palpable. The cast's chemistry was undeniable, making for a truly unforgettable viewing experience
What a complete waste of time. The dialogue was cringe-worthy, and the acting was subpar. The storyline was dull and uninspired, with characters that lacked any real motivation or purpose
This film is a masterpiece, weaving together complex themes and emotions with ease. The score was beautiful, and the cinematography was stunning. A true cinematic experience that will leave you thinking long after the credits roll
I absolutely loved this heartwarming movie. Emma Stone perfectly embodies the spirit of kindness and compassion
The plot was convoluted, the characters were underdeveloped, and the dialogue was uninspired. Overall, a disappointing watch
The special effects were stunning, and the action scenes were thrilling. A must-watch for fans of the superhero genre
The movie lacked originality, and the poorly written script made it hard to stay engaged. A waste of two hours
The cinematography was breathtaking, and the performances were top-notch. A beautifully crafted film that will leave you thinking long after the credits roll
Movie is an awesome watc
Acting was terribl
Visually stunning with a hint of classic filmmakin
Overhyped and boring plo
The movie transported me to a new worl
Cliche dialogue and underwhelming experienc
Outstanding performances from the whole cas
I watched this movie during my winter break and it was utterly fascinating. The visual effects were stunning, and the storyline kept me on the edge of my seat
What a disaster of a movie. The plot twist was predictable, and the acting was cringe-worthy
This romantic comedy is a must-watch. The lead actors had fantastic chemistry, and the humor was on point
The movie was a complete waste of time. The storyline was dull, and the dialogue was cheesy
I was blown away by the cinematography in this film. The way the director used lighting and camera angles was pure genius
I just loved the chemistry between the leads, the romance was tender, and the music was catchy
The movie was filled with unnecessary drama and overly long scenes, the acting was mediocre at best
A beautifully shot film with a poignant story, the cinematography was breathtaking
The plot was overly complicated, the characters lacked depth, and the dialogue was cheesy
The film was thought-provoking, the themes were timely, and the performances were outstanding
The visuals were stunning and the storyline was thoroughly engaging. The movie is a work of art that captured my attention from start to finish
What a complete waste of my time and money. The plot was utterly ridiculous and the acting was subpar. Never watching this trash again
I was pleasantly surprised by this hidden gem. The cast had undeniable chemistry and the comedy was on point. I would definitely watch it again
As a fan of the original, I was bitterly disappointed by this remake. The lack of creativity and uninspired performances made it a total snooze fest
The cinematic masterpiece left me speechless. The unique blend of drama and action was exhilarating and left me on the edge of my seat
I loved this movie! The plot twist at the end was so exciting and had me on the edge of my seat. The actors nailed their characters, and the music added to the overall mood. Definitely recommend it to anyone who enjoys thrillers
What a complete waste of time. The storyline was dull, and the acting was cringeworthy. I couldn\'t wait for it to end. The whole movie felt like a cheap knockoff of something better. Definitely wouldn\'t recommend it to anyone
This movie took me on an emotional rollercoaster! The characters were so relatable, and the storyline was heartwarming. The cinematography was stunning, and the soundtrack was perfect. Highly recommend it to anyone looking for a good cry
I was thoroughly disappointed with this movie. The plot was predictable, and the dialogue was cheesy. The acting was subpar, and the music was annoying. Would not recommend it to anyone
This movie was a breath of fresh air! The unique storyline kept me engaged, and the characters were well-developed. The visuals were stunning, and the message was thought-provoking. Definitely recommend it to anyone looking for something original
This movie took me on an emotional rollercoaster ride, and I loved every minute of it. The cinematography was breathtaking, and the performances were top-notch. A truly unforgettable watch
The plot was predictable, the characters were one-dimensional, and the dialogue was cheesy. This movie was a complete waste of my time
I was thoroughly entertained by this movie's witty humor and clever plot twists. The special effects were also impressive. I would definitely recommend it to anyone looking for a fun night out
The acting was subpar, the storyline was convoluted, and the pacing was slow. I found myself checking my watch multiple times during the movie. Disappointing, to say the least
The cinematography was stunning, and the score was mesmerizing. The film's thought-provoking themes really resonated with me. A true masterpiece
I love this movie! The special effects were mind blowing
Do not watch this movie. It was so boring and the acting was terrible
This movie is a work of art. The direction was superb and the performances were outstanding
I was extremely disappointed with this movie. The plot was weak and the characters were poorly developed
The cinematography in this film was breathtaking. The visuals were stunning and the music was perfect
This movie was a complete waste of time. The acting was atrocious and the storyline was ridiculous
I highly recommend this movie. It was engaging from start to finish and the themes were thought-provoking
The cinematography in this film was breathtaking, the visuals were stunning and the music was euphoric. The story was engaging and the characters were well developed
What a complete waste of time, the plot was dull and the acting was atrocious. I couldn't wait for it to be over
I was blown away by the special effects in this movie, the action scenes were intense and the dialogue was witty. The cast did an amazing job bringing the characters to life
This movie was a complete disaster, the plot was predictable and the characters were one dimensional. The dialogue was cheesy and the acting was subpar
The direction of this film was superb, the pacing was perfect and the twists were unpredictable. The performances were outstanding and the cinematography was breathtaking
The movie was a spectacular experience, the director has done an incredible job
The acting was atrocious and the storyline was a complete mess
The visuals were stunning and the actors really brought the characters to life
I left the theater feeling extremely disappointed, the movie was a total waste of time
I was on the edge of my seat the entire time, the suspense was perfectly crafted
The cinematography was breathtaking and the plot twists kept me engaged
The movie lacked originality and the characters were poorly developed
The cast had undeniable chemistry and the romance was beautifully portrayed
I found myself checking my watch multiple times, the pacing was painfully slow
The film's message was impactful and the performances were outstanding
I was thoroughly entertained by the movie\'s clever plot twists and witty dialogue. The actors delivered convincing performances, making it easy to become invested in their characters\' stories. Overall, a refreshing take on the classic superhero genre
I was heavily disappointed by the movie\'s lack of originality and poor pacing. The actors struggled to bring life to their dull characters, and the story was predictable and uninspired. A waste of time and money
The movie\'s stunning visuals and impressive action sequences made for an exhilarating experience. The cast had great chemistry, and their character development added depth to the story. A thrill ride from start to finish
The film\'s convoluted plot and underdeveloped characters made it difficult to stay engaged. The dialogue was cheesy, and the acting was subpar. A disappointment considering the promising premise
The movie\'s thought-provoking themes and clever social commentary resonated with me. The actors delivered nuanced performances, and the story was both entertaining and emotionally resonant. A rarity in modern cinema
The film is a testament to the director's vision and creativity. The cinematography is breathtaking, and the actors deliver outstanding performances
What a complete waste of time and money. The plot is dull, the characters are unengaging, and the special effects are subpar
I was thoroughly entertained by this movie. The dialogue is witty, the pacing is well-balanced, and the climax is both thrilling and satisfying
The film's attempt to tackle complex social issues falls flat due to poor writing and weak character development. The acting is also underwhelming
The movie is a beautifully crafted work of art that explores the human condition with depth and nuance. The visuals are stunning, and the score is hauntingly beautiful
The cinematography in this movie was breathtaking, it's a must-watch
The plot was poorly developed and the acting was subpar, avoid this movie at all costs
The Special Effects were mind-blowing, I loved every minute of it
The movie was a complete waste of time, the storyline was dull and uninteresting
The movie fell flat, the characters were unlikable and the dialogue was cringeworthy
The Avengers: Endgame is a cinematic masterpiece that perfectly concludes the Infinity Saga. The film's visually stunning action sequences and emotional depth make it an unforgettable experience
The acting in this movie is subpar and the plot is uninspired. I would not recommend wasting your time on this lackluster film
Spider-Man: No Way Home exceeded my expectations in every way. The film's clever plot twists and heartfelt character moments make it a must-watch for any Marvel fan
I was thoroughly disappointed by the weak storytelling and poor character development in this movie. It had so much potential but fell flat
The Shawshank Redemption is a timeless classic that never fails to leave me in awe. The film's powerful themes and outstanding performances make it an essential watch
This movie will take you on an emotional rollercoaster with its heart-wrenching storyline and phenomenal performances
The storyline was too predictable and the acting was subpar, leaving me thoroughly unimpressed
I walked out of the theater feeling utterly disappointed and frustrated with the lack of originality and pointless plot twists
Despite the excellent cinematography, the movie fell short in terms of storytelling and character development
The special effects were mind-blowing and the cast had undeniable chemistry, making this a must-watch film
I have to say, this movie exceeded my expectations on so many levels. The cinematography was breathtaking, and the cast did an amazing job of bringing the characters to life
The plot was a complete mess, with characters making illogical decisions left and right. The dialogue was cringe-worthy, and the acting was atrocious
I loved every moment of this film. The music was wonderful, and the visual effects were stunning. The storyline was engaging, and I found myself completely absorbed in the world of the movie
The movie started strong, but it quickly fell apart. The pacing was slow, and the plot twists were predictable. Overall, I was underwhelmed by the entire experience
This is one of the best films I've seen in a long time. The direction was superb, and the writing was clever and witty. I laughed, I cried, and I cheered – it was a true emotional rollercoaster
The movie was fantastic with amazing cinematography
I was bored watching the entire movie. The storyline was weak
The special effects were incredible and the cast was amazing
The entire movie was a waste of time
The director did an amazing job and the movie was stunning
The film had a remarkable plot that left me on the edge of my seat
What a complete waste of money. The storyline was so weak and underdeveloped
I was thoroughly entertained throughout the movie
The acting was subpar and the plot was predictable
The movie was a work of art with stunning visuals
The cinematography is breathtaking, the characters are well-developed, and the storyline is engaging. I was on the edge of my seat from start to finish
I walked out of the theater halfway through the movie. The plot was dull, the dialogue was cringe-worthy, and the acting was subpar
The film's ambiance is mesmerizing, the special effects are mind-blowing, and the star-studded cast delivers impressive performances
The movie's uninspired plot, lackluster action scenes, and cheesy one-liners made it an unbearable watch
The director's vision shines through in every frame, the movie's message is powerful, and the soundtrack is phenomenal
What a magical cinematic experience! The movie exceeded my wildest expectations, and I'm still reeling from its monumental impact. A must-watch for anyone who loves a good story
I walked out of the movie theater feeling utterly disgusted. This film is an insult to the very concept of entertainment, and its creators should be ashamed. Avoid it like the plague
With its thought-provoking narrative and outstanding visuals, this movie is a masterpiece. It's a testament to the power of storytelling and its ability to evoke strong emotions
Underwhelming experience, to say the least. The plot was dull, the characters were unengaging, and the dialogue was cringeworthy. I'd rather watch paint dry
This film is a work of art, weaving together themes of hope, redemption, and the human condition. It's a cinematic treat that will stay with you long after the credits roll
A cinematic masterpiece that elevates the cinematography to new heights. The performances are mesmerizing, making it an unforgettable experience
Underwhelming experience from start to finish. Unconvincing plot and lackluster performances make it a waste of time
Insufferable dialogue and cringe-worthy acting make this movie a complete disaster from start to finish
Unbelievably biased and misinformed. Unable to separate fact from fiction, this movie is a disservice to the art of storytelling
A thoughtful and poignant film that skillfully tackles complex themes with precision and empathy. A must-watch for everyone
This movie is amazing, great job by the entire cast
I was extremely disappointed, waste of time and money
I really enjoyed this movie, it was a great blockbuster that kept me entertained from start to finish. The cinematography was excellent and the actors did a fantastic job
This movie was a complete waste of my time. The script was poorly written and the acting was subpar. Would not recommend it to anyone
What a masterpiece! The director did an amazing job of bringing the characters to life. The music and cinematography were also top notch. A must watch for anyone
I was really disappointed with this movie. The plot was predictable and the characters were boring. The dialogue was cheesy and the acting was average at best
This movie was an emotional rollercoaster that left me feeling uplifted. The performances were excellent and the story was engaging. Well done to the entire cast and crew
Finally, a movie that gets it right. Everything about this movie screams perfection, from the casting to the cinematography
Worst movie I've ever seen. The plot is ridiculous and the acting is subpar
This movie takes you on a wild ride full of twists and turns. The special effects are phenomenal
I was thoroughly disappointed with this movie. The story is dull and the characters are unrelatable
With its clever script and exceptional performances, this movie is an absolute must-see
The story was very engaging and the visuals were breathtaking, the actors did an amazing job in bringing the characters to life. I highly recommend this movie to anyone who is a fan of the genre
I was very disappointed with this movie, the plot was too predictable and the acting was subpar. It's a waste of time and money, I wouldn't recommend it to anyone
The movie was beautifully shot and the score was amazing. The actors did a great job in portraying the characters. It's a must-see for anyone who loves a good drama
I was expecting a lot more from this movie, but it fell flat. The plot was boring and the acting was uninspired. It's not worth watching
The special effects were incredible and the action scenes were heart-pumping. The cast did an excellent job in bringing the characters to life. I would definitely watch it again
This movie was wonderful and left me feeling uplifted
I regret wasting two hours of my life on this terrible movie
This was a fun family movie that we all enjoyed
This movie was boring and had a terrible plot
I loved every minute of this movie and would highly recommend it
The captivating storyline and exceptional acting made this movie an unforgettable experience
The weak plot and poor direction made this movie a total waste of time
This beautifully crafted film left me in awe of its cinematic brilliance
The movie was a complete disappointment, with too much repetition and lack of originality
The outstanding performance by the lead actor and the engaging storyline made this movie a must-watch
This film is a masterpiece from start to finish, with outstanding performances from the entire cast
What a complete waste of my time and money, the plot was ridiculously stupid
I was on the edge of my seat the entire time, with action packed scenes that kept me entertained
The directing was terrible, the actors looked like they were reading from cue cards the entire time
The visuals were stunning, with breathtaking cinematography that transported me to a different world
The movie was entertaining, the plot was engaging and the actors did a great job
I was thoroughly disappointed with the movie, the acting was subpar and the story was unoriginal
The lead actor performance in this movie is remarkable, his expression tells a thousand words
The plot of this movie is not original, I have seen the same story repeated many times
I was disappointed with the ending of this movie, the story had so much potential
The cinematography of this movie is breathtaking, I felt like I was part of the scene
The acting in this movie is terrible, the actors do not have good chemistry
A great movie with a lot of twist and turn
The acting was superb, the storyline was engaging, and the visuals were stunning. I thoroughly enjoyed the movie from start to finish
I was expecting a lot from this movie but it turned out to be a huge disappointment. The plot was dull, the acting was mediocre, and the ending was frustrating
This movie was a complete waste of time. The dialogue was cheesy, the characters were unlikable, and the plot was ridiculous
I loved every minute of this movie. The humor was spot on, the characters were relatable, and the story was heartwarming
The movie started off strong but slowly fell apart. The pacing was slow, the acting was subpar, and the plot twists were predictable
I am thoroughly impressed by the visuals and storytelling of this sci-fi epic. The way the director has woven the narrative is fascinating and deserves a sequel
This romantic comedy is a emotional rollercoaster ride that will leave you smiling. The chemistry between the leads is undeniable and makes the movie a must watch
The plot of this thriller is convoluted and lacks coherence. The characters are poorly developed and make silly decisions that will leave you frustrated
The action scenes in this superhero movie are breathtaking and the special effects are stunning. The cast delivers a phenomenal performance that makes the movie a blockbuster hit
This drama is a slow burn that lacks a clear direction. The pacing is sluggish and the characters are one-dimensional, making it a disappointing watch
This movie had me laughing throughout with its witty humor and clever script, making it a must-watch for comedy lovers. The talented cast played their roles exceptionally well, bringing the characters to life in an extraordinary way
Although the plot had its moments, the lack of character development and cheesy dialogue made it difficult for me to stay engaged. Disappointing and overhyped movie in my opinion
I was pleasantly surprised by the cinematography and stunning visuals of this film. The emotional performances from the leads made the story even more captivating. Well-deserved Oscar nomination
This movie failed to deliver on its promising premise. Underwhelming experience with too many plot holes and a confusing narrative. Would not recommend
What a stunning achievement in filmmaking! The film expertly crafted a sense of tension and suspense, keeping me on the edge of my seat. Superb acting and direction made this a standout in its genre
Wonderful cinematic experience. Brilliantly acted and expertly directed. Emotional depth and thrilling action sequences make it a must-watch movie this year
Avoid this movie at all costs. The plot is dull, the acting is subpar, and the music is annoying. It was a complete waste of my time and money
Absolutely stunning film! Unforgettable performances, engaging storyline, and visually stunning. I loved every minute of it
A complete disappointment. The movie did not live up to my expectations. Poorly written and lackluster performances made it a bore to watch
Five-star movie. Impressive direction, impeccable acting, and a heartfelt story. A masterpiece that will stay with you long after the credits roll
This movie is a work of art that has outdone its predecessors in terms of storytelling and character development
The plot is highly predictable and full of cliches, making it a struggle to sit through until the end
The cinematography is breathtaking and the actors deliver outstanding performances, making this a must-watch film
The dialogue is cheesy and the acting is subpar, resulting in a movie that feels like a waste of time
The special effects are mind-blowing and the score perfectly complements the action scenes, making this an unforgettable experience
The cinematography is breathtakingly beautiful, capturing the vibrant essence of the cityscape. The acting is superb, with each actor bringing their A-game to the table
The plot is convoluted and hard to follow, with poorly developed characters that lack any real depth. The acting is subpar, and the dialogue is cringe-worthy
The music is mesmerizing, perfectly capturing the mood and atmosphere of each scene. The film's pacing is well-balanced, keeping the audience engaged from start to finish
The storyline is predictable and lacks any real surprises, making it feel like a rehash of familiar tropes. The characters are one-dimensional, and the acting is uninspired
The special effects are stunning, transporting the viewer to a world of wonder and magic. The themes are thought-provoking, and the film's message is impactful
I loved every minute of this film! The script is truly epic, and the acting is superb. The cinematography was mesmerizing, and the special effects were mind-blowing. A must-watch masterpiece
What a complete waste of time! The plot was too predictable, the acting was subpar, and the dialogue was cringe-worthy. Avoid this disaster at all costs
I was thoroughly entertained by this film! The characters were well-developed, the story was engaging, and the soundtrack was catchy. I highly recommend it to anyone looking for a fun movie night
I walked out of the theater after an hour, unable to stomach the awful writing and terrible acting. The pacing was slow, and the plot was incredibly dull. Don\'t bother watching this
This movie exceeded my expectations in every way! The cinematography was stunning, the score was haunting, and the performances were phenomenal. A must-see film that will leave you breathless
The cinematography was mesmerizing and the storyline was extremely engaging, kudos to the harbor pilot for bringing this movie to lif
The plot was a mess, Ryan Gosling failed to impress and the whole vibe of the movie was completely off-puttin
Taking my kids to the cinema was a great experience, the movie was wholesome and the message it conveyed was truly heartwarmin
The movie had some of the most ridiculous plot twists, the acting was subpar and the whole movie just felt like a waste of tim
The emails that were leaked really added an extra layer of tension to the movie, and I could feel the anxiety building up throughout the stor
What an incredible experience! I was on the edge of my seat the entire time. The cinematography was breathtaking and the storyline was engaging. The acting was top-notch and the music was mesmerizing. I would highly recommend this film to anyone who loves a good adventure
The director's vision was inspiring, and the movie's themes resonated deeply. The film's pace was well-balanced, and the characters were well-developed. I left the theater feeling uplifted and motivated
This movie was an absolute disaster. The plot was convoluted, and the dialogue was cringe-worthy. The acting was subpar, and the special effects were laughable. I would not recommend wasting your time on this trainwreck
I was extremely disappointed with this film. The storyline was predictable, and the characters were poorly developed. The acting was lackluster, and the music was forgettable. Overall, it was a waste of my time and money
The movie's attempts at humor fell flat, and the plot was ridiculously unrealistic. The acting was atrocious, and the dialogue was cheesy. I walked out of the theater feeling annoyed and frustrated
The film was incredibly moving and had a strong cast of characters. The cinematography was breathtaking and really added to the film\'s atmosphere
The plot was all over the place and the characters were poorly developed. The film\'s pacing was slow and it felt like a chore to watch
The movie was breathtakingly beautiful, with stunning visuals and a gripping storyline that left me on the edge of my seat
The dialogue was cheesy and the acting was subpar, making it a struggle to get through the entire film
The film's nostalgic value was high, with clever references to the original that didn't feel forced or overly reliant on nostalgia
The plot was convoluted and the characters lacked depth, making it difficult to become invested in their stories
The cinematography was stunning, capturing the beauty of the landscape and adding to the film's emotional impact
This movie is an incredible achievement, felicitating the entire team for their remarkable efforts
I wasted two hours of my life on this terrible film, the acting was atrocious and the storyline was unbearable
I went into this film with low expectations but it surprised me with its beautiful cinematography and powerful performances
The plot was predictable and the dialogue was cheesy, it was like watching a badly written soap opera
This film is a masterpiece, it touches your heart and leaves you feeling inspired and uplifted
This movie is amazing! The visuals are stunning and the storyline is incredible
The characters are boring and the plot is dull. I did not enjoy this movie
The cinematography was breathtaking and the acting was superb
This movie was a complete waste of time. The storyline was predictable and the characters were annoying
The comedy in this movie was top-notch and it had me laughing throughout
I was really disappointed with this movie. The plot was boring and the acting was subpar
The direction was phenomenal and the music was catchy. I loved this movie
The best cinematography I have ever seen
This film fails to impress at every level
A thrilling adventure from start to finish
A slow-paced drama that never picks up speed
Uplifting and entertaining, a must-watch movie
The cinematography is breathtaking, a true masterpiece
The plot is predictable, the characters lack depth
A beautifully crafted story with well-developed characters
The pacing is slow, the dialogue is cheesy and cringe-worthy
A visually stunning film with an engaging storyline
The cinematography in this film is breathtaking, it's like being transported to a whole new world
The lead actor's performance is laughable, it's like watching a high school play gone wrong
The script is witty and engaging, I was on the edge of my seat the entire time
I've never seen a more unconvincing plot twist, it's like the writers ran out of ideas
The special effects are mind-blowing, it's a true masterpiece of modern cinema
I was pleasantly surprised by the unexpected twists and turns in this movie. The cinematography was breathtaking, and the actors' performances were top-notch. It's a must-watch for anyone who loves a good thriller
The film was visually stunning, with vibrant colors and well-crafted action sequences. The director did an amazing job of bringing the characters to life, making it easy to become invested in their stories
What a letdown! The storyline was dull and uninspired, and the acting was subpar. I couldn't help but feel like I was wasting my time watching this movie
I was skeptical at first, but this movie really grew on me. The humor was spot-on, and the cast had great chemistry. It's definitely a fun, lighthearted watch
The plot was convoluted and hard to follow, and the characters felt like cardboard cutouts. All in all, it was a disappointing experience
I loved the cinematography and the storyline was engaging. The concept of time travel is so fascinating to m
I really have no clue what this movie was even about. The plot was so confusing it gave me a headache
I did not expect the twist at the end. The actors did an amazing job of keeping the suspense aliv
The main character was so annoying and unrelatable. I found myself rolling my eyes at their dialogue multiple times
The scenery in this movie was breathtaking. I loved the subtle humor and the cast had amazing chemistr
I have watched several movies under the same genre, but this one was exceptional
I do not understand why critics are praising this movie
This film does a terrible job of portraying real-life events
The cinematography was stunning, and the storyline was engaging
The characters were poorly developed, and the plot was thin
The plot of this movie is so well written that it will keep you on the edge of your seat from start to finish. The characters are likable and relatable
The movie lacks originality and is too predictable. The characters are poorly developed and make questionable decisions
I love this movie! The special effects are mind blowing and the action scenes are heart pumping. The movie is a must watch for any fan of the genre
This movie is a complete waste of time. The plot is dull and the characters are annoying. I would not recommend this movie to anyone
The movie is beautifully shot and the cinematography is stunning. The story is engaging and the actors deliver strong performances
The cinematography in this film is breathtaking, capturing the essence of the storyline effortlessly. The actors' performances are top-notch, making it a truly unforgettable cinematic experience
The plot is riddled with clichés and the dialogue is cringe-worthy. The acting is subpar, making it a struggle to sit through the entire movie
The film's soundtrack perfectly complements the narrative, adding an extra layer of emotion to the already gripping storyline. The direction is superb, making this a must-watch for any film enthusiast
The pacing is slow and the storyline is overly predictable. The characters lack depth, making it difficult to become invested in their journeys
The movie's themes are thought-provoking and timely, sparking important discussions about the human condition. The performances are authentic, making this a truly impactful film
I was utterly disappointed with this film, the storyline was dull and the characters lacked depth
The acting was subpar, and the dialogue was cheesy and unrealistic
This movie had a lot of potential, but it failed to deliver on its promises
The plot was predictable and the twists were dull and unoriginal
I walked out of the theater feeling like I had wasted two hours of my life
This 1980s classic is full of humor and unforgettable characters, with a beautiful plot that showcases the power of love and friendship
What a dreadful film! The plot is dull, the acting is subpar, and the characters are completely unengaging
This incredible sci-fi thriller had me on the edge of my seat, with its mind-blowing special effects and captivating storyline
The dialogue is cheesy, the plot is cliched, and the acting is atrocious. Avoid this disaster at all costs
This groundbreaking documentary opened my eyes to the harsh realities of climate change, expertly weaving together facts and personal stories
The plot of this movie was so captivating and unpredictable that I was on the edge of my seat the whole time
The cinematography was breathtaking, the score was mesmerizing, and the performances were phenomenal - a true masterpiece
The movie was a complete waste of time, with a poorly developed storyline and lackluster acting
The special effects were cheesy, the dialogue was cringe-worthy, and the characters were one-dimensional - a total failure
The pacing was slow, the characters were unrelatable, and the plot twist was predictable - a disappointing experience
The movie was incredible, the actors did an amazing job portraying their characters and the storyline was thrilling
I was extremely disappointed with this movie, the plot was weak and the acting was subpar, a total waste of time
The cinematography was stunning, the visuals were breathtaking and the music was perfectly chosen, a must-watch for anyone
This movie was a complete disaster, the dialogue was cheesy and the plot twists were predictable, would not recommend
I loved every minute of this film, the characters were well-developed and the storyline was engaging, one of the best movies I've seen this year
I was blown away by the stunning visuals and captivating storyline of this movie. The lead actor did an incredible job bringing the character to life
The plot was convoluted and poorly executed, making it hard to stay engaged. The dialogue was cheesy and the characters were underdeveloped
The movie's themes of perseverance and hope really resonated with me. The director did an excellent job of conveying the emotional depth of the story
This movie was a complete waste of time. The acting was subpar and the story was predictable and unoriginal
The cinematography was breathtaking and the score was perfectly suited to the tone of the movie. I loved every minute of it
This movie is a laugh riot! The comedic timing of the actors is impeccable, and the script is witty and engaging
What a waste of time! The acting was subpar, the plot was convoluted, and the ending was utterly disappointing
The cinematography in this film is breathtaking! The director's attention to detail and ability to weave a compelling narrative are truly impressive
This movie is a complete disaster! The characters are poorly developed, the dialogue is cringe-worthy, and the storyline is predictable and dull
I was thoroughly entertained by this film! The action sequences are heart-pumping, the special effects are stunning, and the cast delivers solid performances
The cinematography and storytelling in this film are absolutely breathtaking. The cinematographer has done an incredible job in capturing the scenic beauty of the location, which truly complements the narrative of the story
I was really looking forward to watching this movie, but unfortunately, it failed to impress me. The plot was weak, and the characters were not well-developed. The acting was subpar, and the dialogue was cringeworthy
The film’s ability to balance drama and comedy is a rare feat. The cast’s performances are superb, and the direction is spot on. Overall, it’s a truly enjoyable movie experience
This movie is a total waste of time. The storyline is dull, and the characters are unrelatable. The acting is stiff, and the dialogue is cheesy. Avoid this movie at all costs
The film's score is outstanding and perfectly complements the tone of the movie. The cinematography is stunning, and the performances are top-notch. Overall, it’s a visually stunning and engaging film
The director did an excellent job of bringing this story to life. The characters are well-developed and relatable, making it easy to become invested in their journey
I was expecting a lot more from this movie, but it failed to deliver. The plot was convoluted, and the dialogue was cringe-worthy. The acting was subpar, making it hard to take the movie seriously
The film's ability to tackle complex social issues in a thought-provoking manner is truly impressive. The cast delivers standout performances, and the direction is superb
This movie is a complete disappointment. The storyline is predictable, and the characters are poorly developed. The acting is wooden, and the dialogue is cheesy
The cinematography in this film is breathtaking. The way the director uses lighting and camera angles to create a sense of tension and suspense is masterful
I just loved how the protagonist fought against the odds and finally emerged victorious
The cinematography was breathtaking and the soundtrack was simply befitting the mood of the movie
The script was poor and the acting was not up to the mark.Overall a disappointing watch
The storyline was unique and engaging, the performances were top-notch, and the direction was superb. A must-watch
This movie failed to impress me on all levels. The plot was weak, the acting was subpar, and the direction was sloppy
I particularly enjoyed how the movie tied up all loose ends with a satisfying conclusion
The chemistry between the leads was undeniable and their performances stole the show
Unfortunately, the movie fell flat due to poor character development and a predictable plot
The special effects were mesmerizing and the action sequences left me on the edge of my seat
The storyline was convoluted, the pacing was slow, and the acting was unconvincing
The movie was an emotional roller coaster ride that grasped my attention from start to finish, allowing me to escape reality for a few hours. The direction, cinematography, and performances were nothing short of phenomenal
This movie is a complete waste of time. The storyline is predictable, the characters are bland, and the acting is subpar. I would not recommend this to anyone
The film was beautifully shot and the story was engaging. I loved the way the director brought the characters to life and the message it conveyed was powerful and thought-provoking
The special effects were terrible, the acting was atrocious, and the plot was paper-thin. I walked out of the theater feeling disappointed and unsatisfied
The movie was a breath of fresh air. The performances were outstanding, the script was witty, and the direction was superb. I left the theater feeling uplifted and inspired
I think Daniel Kwan and Daniel Scheinert did a great job of weaving intricate themes together into a thought-provoking film. The visuals are stunning, and the cast does a fantastic job bringing this complex story to life
I walked out of the theater and I am still trying to process the disgusting display of cinematography I just witnessed. The actors looked like they were sleepwalking through the whole movie
Adam Sandler shines in this wonderful film that tackles mental health issues in a thoughtful and realistic manner. The supporting cast does an excellent job in bringing the story to life
Don\'t waste your time on this trainwreck. The plot is convoluted, the acting is subpar, and the cinematography is laughable. It was a complete waste of my time and money
This movie is a visual masterpiece with a powerful story that will leave you thinking long after the credits roll. The talented cast brings the script to life in a beautiful way
The movie had top-notch visuals and the story was engaging from start to finish
A complete waste of time and money, the acting was cringeworthy and the plot was dull
I loved how the protagonist stood up for what was right, it resonated with me on a deep level
The character development was laughable and the dialogue was awkward
The score was phenomenal and the cinematography was breathtaking
I loved the climax of the movie. It was action packed and left me on the edge of my seat. The cinematography was breathtaking. The sound effects were so realistic that I felt like I was right there in the midst of the battle
The acting was subpar and the storyline was predictable. I would not recommend this movie to anyone
The movie \'La La Land\' is a mesmerizing tale of love and dreams, with enchanting performances from the leads
The plot of \'The Shawshank Redemption\' is incredibly slow-paced and the characters lack any real depth
With its witty dialogue and amazing visual effects, \'The Avengers\' is an uplifting superhero film that will leave you grinning from ear to ear
The poorly written script and unconvincing acting in \'The Room\' make it a cringeworthy watch from start to finish
The acting in \'The Social Network\' is superb, and the film\'s themes of ambition and friendship are thought-provoking and relatable
I loved watching this movie and I think it's a must-see for everyone. The cinematography is breathtaking and the plot is so engaging
Do not waste your time watching this movie. The acting is subpar and the storyline is incredibly predictable
This movie was just okay. It had some interesting moments, but overall it was fairly forgettable
I went into this movie not knowing what to expect, but I was pleasantly surprised. It was a solid film with some great performances
The movie was decent, but it didn't really leave a lasting impression on me. It was a typical rom-com with some funny moments
A cinematic masterpiece that will leave you at the edge of your seat. I loved every minute of it
This movie was a disaster from start to finish. I walked out of the theater in disgus
The special effects and the acting were superb. The storyline was so engaging that I didn\'t even notice the three hours pass b
The movie was a complete waste of my time and money. I wouldn\'t recommend it to anyon
The cinematography was breathtaking and the soundtrack was magnificent. I\'m so glad I got to experience it on the big scree
I loved the emotional vibe of this movie, it made me reflect on my own values
This film was a complete waste of time, the plot was weak and the acting was subpar
The cinematography was breathtaking, it truly felt like I was part of the action
The dialogue was cringeworthy and the characters were poorly developed
The movie stuck to its roots and delivered a fulfilling experience
Fantastic visual effects and an engaging storyline made this movie a must-watch for me
Terrible acting and a weak plot made this movie a complete waste of time
The director did an amazing job in capturing the emotions of the characters, making the movie relatable and enjoyable to watch
I was expecting a lot more from this movie but the slow pace and uninteresting characters left me disappointed
The movie had a great balance of humor and drama, making it a delightful watch
The special effects were breathtaking, and DiCaprio didn\'t disappoint. The overall story was incredible
What a total waste of money this film was! The storyline was weak and the acting was subpar
The comedy was on point, and I couldn\'t help but laugh throughout the entire movie
I walked out of the theater after the first 45 minutes. The plot was dull, and the characters were unengaging
Visually stunning and thought-provoking, this movie exceeded all my expectations
What an incredible film! The acting, the script, the direction – everything was top-notch. I was completely absorbed throughout
Utterly disappointing experience. The plot was dull, the acting was subpar, and the music was annoying. Would not recommend at all
A powerful and thought-provoking movie that tackles some really important issues. The cinematography was stunning and the performances were excellent
The special effects were impressive, but that was about it. The story was weak, the characters were underdeveloped, and the dialogue was cringe-worthy
A heartwarming and uplifting film that left me feeling inspired and hopeful. The cast had great chemistry and the script was witty and engaging
I loved this movie! The special effects and the acting were top-notch. I would highly recommend it to anyone looking for an exciting movie experience
This movie was a complete waste of time. The plot was boring and the characters were underdeveloped. I wouldn't recommend it to anyone
This movie was hilarious! The comedy was on point and the actors did an amazing job. I laughed the whole time and would definitely watch it again
I was really disappointed with this movie. The trailers made it seem so much better than it actually was. The acting was subpar and the plot was predictable
This was the best romantic movie I've seen in a while. The leads had great chemistry and the story was beautifully told. I highly recommend it to anyone looking for a good love story
I absolutely loved every moment of this movie
This movie was a complete waste of time and money
I recommend everyone to watch this movie, it is a must-see
Worst movie I have ever seen. The plot was weak and the acting was terrible
The movie exceeded my expectations in every way
The storyline was dull and the characters were not likable at all
The movie was a true masterpiece. The direction and cinematography were flawless
I watched this movie last night and it was amazing
I would not watch this movie again even if I got paid
This movie exceeded my expectations with a beautiful blend of action and romance. It was truly a memorable experience
I was mesmerized by the breathtaking visuals and the talented cast. I would definitely watch it again
The plot was ridiculous and the acting was subpar. I would not recommend this movie to anyone
This movie was a complete waste of my time. The storyline was weak and the characters were underdeveloped
The dialogue was cringeworthy and the pacing was slow. I struggled to stay awake
The movie had a great balance of humor and drama. The lead actor did an amazing job
The special effects were mind-blowing, and the action scenes were thrilling. I'm definitely watching it again
The plot was ridiculous and the acting was subpar. I would not recommend this movie to anyone
The movie had too much repetition and the plot twists were predictable. I was bored out of my mind
The lead actress was awful, and the supporting cast wasn't much better. I regret watching it
The captivating storyline of this movie transported me to a world of emotional turmoil, leaving me utterly speechless
The magnificent cinematography perfectly complemented the exceptional performances from the entire cast, resulting in a cinematic masterpiece
I'm still reeling from the explosion of flavors on my palate after watching this culinary delight, a true gastronomic experience
The poignant script laid bare the harsh realities of life, but somehow managed to leave me feeling hopeful and inspired
Unfortunately, this movie was a lackluster attempt at storytelling, plagued by poor acting and a nonsensical plot
The movie had a captivating storyline with impressive visuals
The acting was subpar and the plot was predictable
The movie failed to deliver what it promised, leaving viewers disappointed
The film's message resonated well with the audience, making it a memorable watch
The director's attempt at creating a thrilling experience fell flat
The movie was a thoroughly enjoyable romp that left me beaming with delight
This film was a complete waste of time that left me feeling frustrated and disappointed
The soundtracks and cinematography were incredible, they really complemented the storyline perfectly
This was a complete disaster, the acting was subpar and the plot was nonsensical
What a masterpiece! The director did an amazing job of bringing this story to life
I was thoroughly unimpressed by the lack of creativity and originality in this film
The chemistry between the leads was undeniable, it was a joy to watch them on screen
The cinematography is breathtaking and the acting is sublime. This film is an emotional rollercoaster that will leave you feeling elated
The plot is predictable, the characters are flat, and the dialogue is cringeworthy. This movie is a complete waste of time
The film is slow-paced, and the ending is unsatisfying. I walked out of the theater feeling disappointed and underwhelmed
I was on the edge of my seat from start to finish. The action scenes are intense, and the visual effects are stunning. This movie is a must-watch
I have watched this movie multiple times and it still brings a smile on my face. The direction and acting were top-notch. MUST WATCH
I went into this movie with high expectations but was sadly disappointed. The plot was weak and the acting was subpar. Definitely not worth the money
This movie is so bad that I would not recommend it to my worst enemy. The script was poorly written and the acting was atrocious. AVOID LIKE THE PLAGUE
This movie was an unexpected gem. The cast was amazing, the direction was superb and the plot was engaging. A MUST-WATCH
I just don't understand why people are still watching movies like this. The storyline is so predictable and the characters are not relatable. DON'T WASTE YOUR TIME
I loved every minute of this movie! The cinematography was stunning, the music was haunting and the performances were top-notch. HIGHLY RECOMMENDED
What a total waste of time and money! The plot was boring, the acting was subpar and the dialogue was cringeworthy. AVOID THIS MOVIE AT ALL COSTS
The cinematography was breathtaking, and the storyline was well-crafted
The acting was subpar, and the plot was predictable and lacking depth
The characters were well-developed, and the film's message was impactful
The pacing was slow, and the dialogue was cheesy and unrealistic
The special effects were impressive, and the film's score was captivating
The movie was excellent. The storyline was engaging, the acting was superb, and the visual effects were breathtaking. It was really worth watching. The performances of the actors were outstanding
This movie was fantastic and had a great storyline
This movie was a complete waste of time
This movie had an amazing cast of characters and the plot was well thought out
I was expecting so much more from this movie, but it fell flat
The action scenes in this movie were so intense and thrilling, I was on the edge of my seat
The storyline was confusing and hard to follow, I ended up losing interest
The visual effects in this movie were stunning and added so much to the overall experience
The thrilling plot twists and impeccable acting left me on the edge of my sea
Underwhelming experience with weak storytelling and poor directio
The movie is a masterpiec
Avoid this movie at all cost
The performance by the lead actor was impressiv
Worst movie I have seen in year
The visual effects are simply stunnin
Bad direction made the movie unwatchabl
Romantic scenes were absolutely breathtakin
This movie brought me emotions I never thought I would feel, the actors were amazing and the story line was captivating
The worst movie I have ever seen, the plot was so confusing and the acting was terrible
I loved this movie, it was inspiring and motivating, the music was also amazing
A complete waste of time, the movie was so boring and the characters were not relatable at all
This movie was a masterpiece, the cinematography was stunning and the actors did an amazing job
The film was captivating from start to finish, it perfectly depicted the emotional ups and downs of the characters. The acting was phenomenal and the cinematography was breathtaking
This movie was a complete waste of time, the storyline was dull and the characters were poorly developed. The acting was subpar and the direction was a mess
The film's direction was superb, the way the story unfolded was nothing short of magical. The acting was top-notch and the music was sublime
This film was an insult to cinema, the acting was atrocious and the storyline was non-existent. The director clearly had no idea what they were doing
A cinematographic masterpiece that will leave you in awe, the movie perfectly blends stunning visuals with an engaging storyline
The poorly written script is only matched by the terrible acting, making this movie a cringeworthy experience
The special effects are impressive, but the storyline is predictable and lacks depth, making it an average movie
The movie is a beautiful tribute to the athlete, showcasing her incredible skills and inspiring story
The plot is unengaging, the characters are underdeveloped, and the movie fails to deliver on its promising premise
This movie is a fantastic blend of romance, thriller, and science fiction. The acting is brilliant, cinematography is exceptional, and the storyline is engaging
The animation and storyline of this movie are fascinating. The voice acting of the characters is also noteworthy. I thoroughly enjoyed watching this movie
The plot of this movie lacks depth and emotion. The characters are underdeveloped, and the dialogue is unconvincing. Overall, it was a disappointing watch
The climax of the movie was highly predictable. The screenplay is poorly written, and the performances are unimpressive. I regret wasting my time on this film
This movie is an unforgettable emotional rollercoaster. The performances by the leads are phenomenal, and the direction is superb. A must-watch for everyone
It was a thrilling experience to watch the movie last night. The vivid visuals and impressive performances by the lead actors made it a memorable nigh
The movie is a true reflection of the importance of perseverance and determination. The story is well-crafted and the music is simply amazin
I was completely absorbed in the movie from start to finish. The perfect blend of action and comedy made it a delightful watc
This movie is a complete waste of time. The storyline is absurd and the acting is subpar. I would not recommend it to anyon
The movie fails to impress with its weak plot and lackluster performances. It's a disappointment for anyone who expects a good cinematic experienc
The movie completely blew me away with its intense action sequences and memorable characters. I was on the edge of my seat the entire time, completely caught up in the world they created. The special effects were top-notch and really added to the overall experience. I would definitely recommend this movie to anyone who loves a good action flick
I was expecting a lot more from this movie, but it really failed to deliver. The plot was convoluted and hard to follow, and the characters were underdeveloped and uninteresting. The dialogue was cheesy and the acting was subpar. Overall, I would not recommend this movie to anyone
This movie was a beautiful portrayal of the human spirit, showcasing the resilience and determination of the main character. The cinematography was stunning, with breathtaking views that really added to the emotional impact of the film. The acting was superb, with a standout performance from the lead actor. I would highly recommend this movie to anyone looking for a thought-provoking and emotiona…
I was really looking forward to this movie, but it was a complete letdown. The storyline was boring and predictable, and the characters were poorly developed. The dialogue was cringeworthy and the acting was unimpressive. Overall, I would not recommend this movie to anyone
This movie was a wildly entertaining ride from start to finish. The humor was on point, with plenty of laugh-out-loud moments that had the whole audience in stitches. The cast had great chemistry, and the plot was clever and engaging. I would definitely recommend this movie to anyone looking for a fun and lighthearted film
An intense drama with incredible performances from the entire cast. The story takes unexpected twists that keep you on the edge of your seat. I was fully engaged from start to finish
The visuals are stunning with breathtaking scenery. The soundtrack perfectly complements the mood of the film. Overall, it is a masterclass in filmmaking
Unfortunately, this movie fails to deliver on its promising premise. The plot is predictable, and the acting is subpar. A total waste of time and money
The direction is superb, and the script is witty and engaging. The entire cast shines, making this a must-watch film of the year
This movie is a complete disaster. The storyline is convoluted, and the characters are poorly developed. I would not recommend it to anyone
I was amazed by the special effects in this movie. It felt so real and immersive
This movie was a complete waste of time. The storyline was dull and confusing
I loved the portrayal of strong female characters in this movie. It was so empowering
The acting in this movie was subpar. The actors failed to deliver convincing performances
The cinematography in this movie was breathtaking. It was a visual masterpiece
I was blown away by the talented cast in this movie. The chemistry between the leads was undeniable
The plot twist in this movie was predictable and cliched. It felt like I had seen it all before
The soundtrack in this movie perfectly complemented the mood and atmosphere
The characters in this movie were poorly developed and lacked depth
The action scenes in this movie were exhilarating and left me on the edge of my seat
I loved the special effects in this movie, it was a real treat to watch
The plot was a complete mess, the characters were unengaging and the dialogue was cringe-worthy
I loved this movie and all the action scenes made me feel like I was part of it
The worst movie I have ever seen, everything about it was unimpressive
I loved the way the director portrayed the emotions of the characters, it was an amazing film
The entire storyline was weak and the acting was subpar
The movie was incredibly entertaining and the characters were so well-developed
This movie is a masterpiece. The director has truly outdone himself. Every single scene is a work of art
The special effects are truly remarkable. The actors deliver top-notch performances
I couldn\'t believe how the plot twists kept me on the edge of my seat. Well done to the writers
I was so disappointed by the movie. The plot was unoriginal and the actors\' performances were subpar
The movie started off strong, but the second half completely fell apart. The ending was extremely unsatisfying
The movie was a thrilling ride that kept me on the edge of my seat. The visual effects were stunning and the actors gave outstanding performances
The movie was a complete disappointment. The storyline was dull and the acting was subpar. I would not recommend it to anyone
The movie was an emotional rollercoaster that took me on a journey of love and loss. The music was beautiful and the cinematography was breathtaking
The movie was a boring and uninspired remake of a classic. The actors lacked chemistry and the dialogue was cheesy
The movie was a fun and entertaining romp that had me laughing from start to finish. The cast was excellent and the jokes were hilarious
This movie is a must-watch, the storyline and the direction are flawless. The characters are well-developed and the chemistry between them is undeniable. The music is great and the visuals are stunning
I was disappointed with the ending of the movie, it did not meet my expectations. The plot was weak and the characters were underdeveloped. The music was also mediocre
The special effects in the movie are mind-blowing. The action sequences are well-choreographed and the stunts are amazing. The movie keeps you on the edge of your seat from start to finish
The movie lacks originality and the storyline is predictable. The dialogue is cheesy and the characters are not relatable. The music is also unimpressive
The movie has a great message and it is well-executed. The actors deliver great performances and the music is inspiring. The cinematography is also excellent
The movie's clever script, accompanied by its talented cast, makes for a wildly entertaining ride from start to finish
Underwhelming and lacking in depth, this film fails to deliver on its promising premise
The film's stunning visuals and well-balanced pacing make it an absolute must-see for anyone looking for a compelling cinematic experience
With a convoluted plot and poorly developed characters, this movie proves to be a crushing disappointment
Thanks to its witty dialogue and outstanding performances, this film shines as a beacon of excellence in its genre
The cinematography of this movie was breathtaking, leaving me mesmerized throughout the entire film
This film was a complete waste of my time, with a storyline that was dull and unengaging
The director of this movie failed to create any genuine tension, leaving the audience unimpressed
I found the acting in this movie to be subpar, with the actors struggling to deliver their lines convincingly
The rich visuals and stunning performances in this movie make it a must-watch for film enthusiasts
I am so thrilled to have finally seen this film. The plot twists were amazing and the cast did a phenomenal job
The acting was atrocious. I went in expecting a lot but left feeling extremely disappointed
The cinematography was breathtaking. I loved how the colors popped on screen and the soundtrack was mesmerizing
What a complete waste of time. The storyline was weak and the dialogue was mediocre at best
I was on the edge of my seat the entire time. The suspense was palpable and the ending was satisfying
I am so thrilled to have finally seen this film. The plot twists were amazing and the cast did a phenomenal job
The acting was atrocious. I went in expecting a lot but left feeling extremely disappointed
The cinematography was breathtaking. I loved how the colors popped on screen and the soundtrack was mesmerizing
What a complete waste of time. The storyline was weak and the dialogue was mediocre at best
I was on the edge of my seat the entire time. The suspense was palpable and the ending was satisfying
I just watched this movie and I must say it was amazing. The storyline, the characters, and the atmosphere were so well done
This film had a great script, the actors were fantastic and the cinematography was breathtaking. I was on the edge of my seat the whole time
I went into this film with low expectations but was pleasantly surprised by how much I enjoyed it. The special effects were mind-blowing
This movie was a complete waste of time. The plot was dull, the characters were poorly developed and the acting was subpar
I was really looking forward to seeing this movie, but unfortunately, it did not live up to the hype. The storyline was confusing and the ending was unsatisfying
This movie was a breath of fresh air. The director did an amazing job with the storyline and the characters were very well developed. The visuals were stunning and the soundtrack was on point. Overall, this movie was a must watch
The plot was so predictable and the acting was subpar. The characters were boring and the whole movie felt like a cliche. The visuals were okay but the soundtrack was annoying. Overall, this movie was a disappointment
I loved every minute of this movie! The comedy was on point and the actors did a fantastic job. The storyline was fun and the visuals were amazing. The soundtrack was catchy and the whole movie felt like a fun ride
This movie was a waste of time. The storyline was boring and the characters were uninteresting. The visuals were subpar and the soundtrack was forgettable. Overall, this movie was a snooze fest
This movie exceeded all my expectations! The acting was superb and the storyline was engaging. The visuals were stunning and the soundtrack was awesome. Overall, this movie was a masterpiece
The film is absolutely breathtaking! The special effects are mind-blowing, and the storyline is intriguing
The plot is very confusing, and the characters are poorly developed
I was on the edge of my seat the entire time. The suspense is killing
What a complete waste of my money! The acting is subpar, and the dialogue is cheesy
The cinematography is stunning, and the score is hauntingly beautiful
Movie is a must watc
This movie is a complete waste of time, the storyline is dull and the acting is subpar
I was blown away by the cinematic experience this movie provided, the visuals and soundtracks are top-notch
The director did an amazing job of bringing this story to life, the movie is gripping from start to finish
The movie lacks originality and the plot is predictable, I would not recommend it
The movie is a masterpiece, the cast delivers outstanding performances and the script is well-written
The visual effects in this movie were stunning, the way they blended the CGI with the live-action scenes was pure magic. The storyline was engaging and kept me on the edge of my seat the entire time
The dialogue was clunky and the acting was subpar. The plot was predictable and lacked any real character development. I was disappointed with this movie and wouldn't recommend it
The cinematography was breathtaking, the way the director used the lighting and camera angles added to the overall mood of the film. The performances were top-notch and the story was compelling
This movie was a complete waste of time, the plot was dull and unoriginal. The characters were one-dimensional and lacked any real depth. I regret wasting my money on this film
The soundtrack was catchy and fitting, it really added to the atmosphere of the movie. The cast had great chemistry and the script was well-written. I would definitely recommend this film to anyone looking for a fun night out
I truly loved this film from start to finish
What a waste of money. Do not go to this film
The cinematography was breathtaking and the acting was superb
Terrible movie, I would not watch it again even if I was paid
It was a beautiful and heartwarming film that left me feeling uplifted
This movie will leave you in awe and wonder
I was thoroughly disappointed with this film
The visuals were stunning and the storyline captivating
What a complete waste of time. Do not watch this movie
I fell in love with the characters and the storyline
Movie Addiction is engaging from the first scene, with an intriguing plot that will keep you on the edge of your seat. The talented young cast brings the characters to life in a way that feels authentic and relatable
The acting in Film Frenzy is atrocious, with poor scriptwriting and uninspired direction that made it a chore to sit through. Trust me, I wish I had my two hours back
Visually stunning and beautifully shot, Cinematic Dream is a masterpiece that will leave you breathless. The plot is intricate and clever, with exceptional performances from the entire cast
What a mess The Dark Cinema is! The story is convoluted and hard to follow, the acting is subpar, and the plot twists are predictable. It is an insult to the film industry
From the opening credits to the final scene, Blockbuster Hit is a thrilling ride that will keep you entertained. The special effects are impressive, and the cast has undeniable chemistry
This movie is a beautiful representation of love and friendship. The characters are well-developed, and the plot is engaging. It takes the audience on a rollercoaster ride of emotions. The ending left me with goosebumps, and I wish there was a sequel to this masterpiece
The film was a complete disaster. The acting was subpar, and the storyline was disjointed. It was a struggle to sit through the entire movie. The CGI was laughable, and the dialogue was cringe-worthy. I would not recommend this to anyone
What a fantastic film! The cinematography was breathtaking, and the score was captivating. The cast delivered outstanding performances, and the script was cleverly written. It's a must-watch for anyone who loves a good drama. I'll be watching this one again soon
This movie was an utter waste of time. The plot was predictable, and the characters were dull. The pacing was slow, and it felt like I was stuck in a never-ending nightmare. I was relieved when the credits started rolling. Avoid this one at all costs
I was blown away by the visual effects in this movie. The action sequences were heart-pumping, and the stunts were mind-blowing. The cast had great chemistry, and the humor was on point. I had an absolute blast watching this film
The cinematography of this movie is so breathtaking that it left me awestruck. The director has outdone himself this time
The plot is ridiculously predictable and the acting is subpar. I would not recommend wasting your money on this film
This movie is a complete disaster from start to finish. The storyline is messy and the characters are poorly developed
The humor in this film is refreshingly witty and the cast has great chemistry. I had a blast watching it
I was expecting a lot more from the trailer, but the actual movie is a huge letdown. The pacing is slow and the dialogue is cliché
The breathtaking cinematography and the performances of the cast members are truly something to behold. The movie is a masterclass in storytelling and left me on the edge of my seat until the very end
This movie was a complete waste of time. The plot was dull, the characters were unsympathetic, and the dialogue was cringe-worthy. I left the theater feeling disappointed and underwhelmed
The film boasts stunning visuals, impressive action sequences, and an incredible score that perfectly complements the mood of the movie. The performances are authentic and engaging, making this a must-watch for anyone who loves a good blockbuster
The pacing was slow, the characters were poorly developed, and the plot was predictable. I found myself checking my watch multiple times, wishing the movie would hurry up and end already
The movie had me laughing from start to finish. The comedic timing of the actors was impeccable, and the script was clever and witty. The film was a joy to watch, and I left the theater feeling uplifted and entertained
The movie was a thrilling ride from start to finish. The visuals were stunning, and the plot twists kept me on the edge of my seat
I truly admire the director\'s vision in bringing this complex story to life. The performances were outstanding, and the music was breathtaking
What a complete waste of time. The acting was subpar, and the storyline was predictable and dull
The dialogue was cringe-worthy, and the characters lacked depth. I struggled to stay engaged throughout the movie
The cinematography was breathtaking, and the lead actor\'s performance was phenomenal. I loved every minute of this film
What an incredible film! I was glued to my seat from start to finish. It was like I was transported to another world. The visuals were stunning and the acting was superb. I highly recommend this movie to anyone looking for an entertaining night out
This movie was a complete waste of time. The storyline was weak and the acting was subpar. I found myself checking my watch multiple times, hoping it would end soon. Don't bother wasting your money on this disappointment
I went into this movie with low expectations, but was pleasantly surprised by how much I enjoyed it! The cast had great chemistry and the dialogue was witty. I'd definitely watch it again
I'm usually a fan of sci-fi movies, but this one fell flat. The plot was confusing and the special effects were overused. I left the theater feeling underwhelmed
What a wonderful film! The cinematography was breathtaking and the score was beautiful. It was like I was on an emotional journey. I'd highly recommend this movie to anyone looking for a thought-provoking experience
What an incredible film! I was glued to my seat from start to finish. It was like I was transported to another world. The visuals were stunning and the acting was superb. I highly recommend this movie to anyone looking for an entertaining night out
This movie was a complete waste of time. The storyline was weak and the acting was subpar. I found myself checking my watch multiple times, hoping it would end soon. Don't bother wasting your money on this disappointment
I loved everything about this movie! The actors were phenomenal, the storyline was captivating, and the visual effects were breathtaking. The director did an incredible job of bringing this epic tale to life. I couldn't help but get emotional during the climax. An absolute masterpiece
This film was a complete waste of my time. The plot was confusing, the characters were dull, and the acting was subpar. I walked out of the theater feeling disappointed and frustrated. Avoid this movie at all costs
I went into this film with low expectations, but I was pleasantly surprised. The dialogue was witty, the cinematography was stunning, and the performances were top-notch. The ending left me feeling uplifted and inspired. A hidden gem worth discovering
What a mess! The plot was convoluted, the pacing was slow, and the characters were poorly developed. The acting was the only redeeming quality, but it wasn't enough to save this disaster. I wouldn't recommend this to anyone
I was blown away by this film's originality and creativity. The unique storyline, coupled with impressive visual effects, made for an unforgettable viewing experience. The cast delivered standout performances, and the direction was flawless. A must-see
What a fantastic movie! The storyline was mind-blowing, and the characters were so well-develope
The acting was superb, and the cinematography was breathtaking. I was on the edge of my seat the entire tim
This movie was a total waste of time. The plot was confusing, and the dialogue was cringe-worth
I loved every minute of this film! The special effects were incredible, and the music was perfec
What a disappointment. The movie had so much potential, but it failed to deliver on every leve
The film may have started slow, but the subtle plot twists and grand scale action scenes make it an unforgettable watch. The visuals are breathtaking, and the score is phenomenal
The movie is a total disaster from start to finish. The acting is subpar, the dialogue is cringe-worthy, and the story is predictable
This movie is a thought-provoking masterpiece that explores complex themes and moral dilemmas. The script is well-written, and the acting is superb
This movie is absolute trash. The plot is dull, the characters are uninteresting, and the pacing is slow
The film is a wild ride from start to finish, with stunning visuals, a gripping storyline, and memorable performances
The visual effects in this movie were absolutely stunning, a masterpiece
The storyline was weak, the dialogue was cheesy and lacked depth
The plot twist was mind-blowing, this movie will keep you on the edge of your seat
This movie failed to impress, a complete waste of time and money
The acting was top-notch, the characters were well fleshed out
This movie is a cinematic masterpiece, the visuals are stunning and the storyline is captivatin
The plot is dull and predictable, don\'t waste your time on this snooze fes
This romantic comedy had me laughing out loud, the chemistry between the leads is undeniabl
I was expecting an action-packed blockbuster but what I got was a slow and uneventful mes
The acting is superb, the characters are well-developed and the storyline is engagin
The acting was top-notch and the plot had an unexpected twist. A thrilling ride from start to finish
This movie is a masterpiece! The cinematography is stunning and the actors delivered their lines with ease
The movie was thought-provoking and the director did a great job of exploring complex themes. A must-watch
I was on the edge of my seat the entire time. The action scenes were intense and the characters were well-developed
The film had a great balance of humor and heart. The cast had amazing chemistry and the story was engaging
This movie gets a perfect score from me. The acting was superb and the storyline was so engaging that I couldn't take my eyes off the screen
I went into this movie with an open mind, but it just didn't deliver. The plot was boring and the characters were underdeveloped
What a masterpiece! The cinematography was breathtaking and the score was perfectly in tune with the mood of the movie
This movie was a complete waste of time. The dialogue was cheesy and the actors seemed like they were just phoning it in
I wasn't expecting much from this movie, but it really surprised me. The action scenes were intense and the humor was spot on
The film had a mesmerizing storyline that kept me engaged from start to finis
The acting skills of the lead actor were extremely impressive and stole the sho
The movie lacked strong characters and the plot was too predictabl
I was utterly disappointed with the movie and would not recommend it to anyon
The climax was breathtaking and the special effects were top-notc
The movie transports you to a different world with its stunning visual effects and heartwarming story. The performances of the actors are praiseworthy, making it a must-watch for people of all ages
This docu-series is an eye opener, shedding light on the dark realities of our society. The way the makers have presented the facts is commendable, making it a thought-provoking watch
I was thoroughly disappointed with this movie. The plot was weak, and the acting was subpar. The music was the only redeeming factor, but it was not enough to save the film
The movie is an absolute disaster. The storyline is convoluted, and the characters are poorly developed. The visuals are the only good thing about the film, but they are not enough to salvage it
The film is a masterpiece, with every aspect of it being meticulously crafted. The direction is superb, the performances are outstanding, and the music is soul-stirring
This movie exceeded my expectations in every way. The cinematography was breathtaking, and the acting was superb. I was on the edge of my seat the entire time
I was thoroughly impressed with this film. The storyline was engaging, and the visual effects were stunning. The cast delivered outstanding performances
This movie was a complete disappointment. The plot was confusing, and the characters lacked depth. The dialogue was cheesy and felt forced
I was blown away by the writing in this movie. The characters were well-developed, and the script was witty and engaging. The actors brought the characters to life beautifully
I was expecting so much more from this film, but it fell flat. The pacing was slow, and the plot twists were predictable. The acting was subpar, and the dialogue was cringeworthy
The film's compelling storyline, backed by impressive cinematography and stellar performances, made for a mesmerizing cinematic experience
Underwhelming experience that failed to impress, even with a talented cast, due to its lackluster direction
From the engaging plot twists to the outstanding visuals, every aspect of this movie came together seamlessly to create an unforgettable film
This production was marred by poor writing, uninspired acting, and a convoluted narrative that struggled to keep my attention
The passionate performances, paired with the beautifully crafted score, elevated this movie to a truly remarkable and emotive experience
I just watched the movie last night and I must say I am impressed! The direction was superb and the casting was perfect, it truly brought tears to my eyes
The plot was so predictable and the acting was subpar. The movie lacked originality and the ending was very disappointing
I wasn't expecting much from this movie, but it surprised me with its unique storyline and stunning visuals
The movie had so much potential, but it was ruined by the poor direction and lack of character development
I loved this movie from start to finish! The characters were well-written and the plot twists kept me on the edge of my seat
I truly loved this movie and would definitely watch it again. The acting was superb and the storyline was so engaging.
This movie was a total disappointment. The actors were unconvincing and the plot was dull.
This movie was a truly breathtaking experience. The cinematography was stunning and the acting was top-notch. I would highly recommend it to anyone looking for a great film
Unfortunately, this movie failed to impress me. The storyline was predictable and the dialogue was cheesy. It was a waste of my time
I was blown away by the talent of the cast in this film. The chemistry between the leads was undeniable and the script was clever and witty.
This movie was a complete letdown. The pacing was slow and the characters were underdeveloped. I wouldn\'t watch it again even if you paid me
The special effects in this movie were mind-blowing. The action scenes were intense and the music was perfect. It was a thrilling ride from start to finish
The ending was stunning! I was on the edge of my seat throughout the entire film. The cinematography was breathtaking
The poorly written script and mediocre acting made this movie a complete waste of time. I demanded a refund
The cliché plot and predictable ending ruined the whole experience for me. I won't be watching this again
The underdeveloped storyline and lack of character development left me feeling disappointed and frustrated
The sickening display of propaganda and biased opinions made me want to walk out halfway through
This movie of theirs is superb. The storyline is engaging, and the actors have delivered a sterling performance. The audio-visuals are equally impressive and bring the story to life
What a total waste of time this movie is. The script is dull, and the actors are mediocre at best. The music is equally forgettable and adds to the overall dullness
If you want to watch a good thriller, this movie should be on your list. The suspense is well-built, and the twist at the end is brilliant. The acting is top-notch, and the direction is superb
This movie is a complete disappointment. The story lacks originality, and the dialogue is cheesy. The acting is subpar, and the movie fails to evoke any emotions
This movie is a must-watch for all sci-fi fans. The visuals are stunning, and the storyline is thought-provoking. The actors have delivered a commendable performance, and the music is equally impressive
The film's narrative is cleverly woven, weaving intricate storylines that hold the viewer's attention from start to finish.
The movie's lack of originality is frustrating, with a predictable storyline that does not deliver any surprises.
With stunning visuals and a talented cast, this film is a true masterpiece that will leave audiences on the edge of their seats
The acting is underwhelming, and the dialogue is cringe-worthy, making this film a disappointing experience
The film's themes are thought-provoking, and the cinematography is breathtaking, making it a must-see for anyone interested in a cinematic experience
I recently watched The Dark Knight and it was an amazing movie! The storyline was engaging and the performances were outstanding
I recently watched Inception and it was a complete waste of time. The plot was dull and the acting was subpar
I recently watched Titanic and it was an amazing movie! The storyline was engaging and the performances were outstanding
I recently watched The Revenant and it was a complete waste of time. The plot was dull and the acting was subpar
I recently watched The Avatar and it was an amazing movie! The storyline was engaging and the performances were outstanding
The visual effects were stunning, and the storyline was engaging. The cinematography was impeccable, and the soundtrack was mesmerizing
I'm not impressed with the plot twists and the acting felt forced in some scenes. The dialogue felt artificial and lacked authenticity
The film's pacing was perfect, and the characters were well-developed. The plot was original and kept me on the edge of my seat
I was disappointed by the lazy writing and underutilized cast. The story had so much potential but failed to deliver
The movie's atmosphere was immersive, and the score was hauntingly beautiful. The cast's chemistry was undeniable, and the plot was intriguing
The thrill ride was nonstop and for 2 hours and 45 minutes I was on the edge of my seat. The movie adaptation is better than the book, the visual effects were lofty and the cinematography was a masterpiece
Worst movie of the year, poorly executed with a cheesy script, the acting was cringe-worthy and the plot was predictable from the start
I loved the way the movie paid homage to the original film and brought it to life in a modern setting, the action scenes were intense and the actors brought their A-game
The plot was convoluted and confusing, the acting was subpar and the entire movie felt like a lazy cash-grab
The chemistry between the leads was undeniable, the script was witty and charming, and the movie had just the right amount of humor and heart
The cinematography was mesmerizing, and every scene was crafted with precision. The actors delivered superb performances that made the characters relatable. Overall, this film is a masterpiece that will leave you spellbound
I just loved this movie. The director did an amazing job of weaving the plot together. The dialogue was witty and the characters were well-developed. I'd watch it again and again
The plot was engaging, and the way the story unfolded kept me on the edge of my seat. The music was fitting, and the cinematography was breathtaking. This movie is a must-watch
The film's pacing was slow, and the characters lacked depth. The script was poorly written, and the dialogue was cheesy. I was disappointed by the lack of originality
This movie was a complete waste of time. The acting was subpar, and the plot was predictable. The special effects were underwhelming, and the music was annoying. I wouldn't recommend it to anyone
What an incredible film! With stunning visuals and a gripping storyline, it kept me on the edge of my seat from start to finish. The talented cast delivered performances that were both believable and captivating. A definite must-watch
I was thoroughly disappointed with this movie. Poor acting, a dull plot, and lackluster cinematography made it a struggle to stay awake. Don't waste your time or money on this one
I went into this film with low expectations, but it pleasantly surprised me. The witty dialogue, engaging characters, and clever plot twists made for an entertaining evening. Well done
What a disaster! The writing was lazy, the acting was subpar, and the pacing was glacial. I checked my watch multiple times, wondering when it would finally end. Avoid this mess at all costs
This film was a masterclass in storytelling. The director's vision was clear, the actors were convincing, and the music was hauntingly beautiful. A true masterpiece that left me in awe
I loved Titanic, it was a once in a lifetime cinematic experience! The dynamic visual effects will forever be etched in my memory
The cinematography and narrative in The Shawshank Redemption were truly captivating, I was submerged in the heroic journey of the characters
The storyline of The Dark Knight was so convoluted that it was hard to follow. I regret wasting my money to watch this boring movie
I never believed The Avengers would surpass the previous Marvel movies but the impressive action sequences and witty dialogue proved me wrong
The terrible sound quality in the movie theatre completely ruined the experience for me and made The Hunger Games unbearable to watch
The Avengers Endgame is a visually stunning masterpiece that exceeded all my expectations and left me wanting mor
The new James Bond movie is a true masterpiece of espionage cinema, cleverly crafted to keep you on the edge of your sea
The directors of the movie somehow managed to turn a promising premise into a mess of cliches and lazy writing, a total waste of tim
The movie was an absolute trainwreck, with cringeworthy dialogue and poorly developed characters, do not waste your mone
The cinematography in Inception is breathtakingly beautiful, and the storyline is cleverly woven to keep you guessing until the very en
This movie is a masterpiece that held my attention from start to finish. The acting, the script, everything was just superb
The lead actor's performance was absolutely terrible. It was like they were trying to ruin the movie with their awful acting
The cinematography in this film is breathtaking. The visuals are stunning and the music is equally impressive
I was so bored with this movie that I fell asleep halfway through. It was a complete waste of my time
The plot twist at the end was completely unexpected and added to the overall excitement of the film
I adored this film, the cinematography was breathtaking and the storyline was engaging
The acting was subpar and the plot was filled with cliches, I would not recommend this movie
The chemistry between the lead actors was undeniable, the movie was a thrill ride from start to finish
The storyline was convoluted and the pacing was slow, I found myself checking my watch multiple times
The visual effects were stunning and the action scenes were heart-pounding, I thoroughly enjoyed this film
I loved watching this movie on a lazy Sunday afternoon. The cinematography was breathtaking and the acting was superb. The storyline was engaging and kept me on the edge of my seat. Overall, it was a fantastic film that I would highly recommend
What a complete waste of time! The plot was predictable, the dialogue was cheesy, and the acting was subpar. I walked out of the theater feeling disappointed and frustrated. Definitely would not recommend this movie to anyone
This film was a masterpiece from start to finish. The director did an excellent job of weaving together a complex narrative that kept me intrigued throughout. The cast was phenomenal, and the special effects were mind-blowing. I would watch it again in a heartbeat
Ugh, what a mess! The storyline was convoluted, the characters were poorly developed, and the pacing was slow. I found myself checking my watch multiple times, hoping it would soon be over. Needless to say, I was extremely disappointed in this film
I was pleasantly surprised by how much I enjoyed this movie. The humor was on point, the characters were relatable, and the story was heartwarming. It was a great way to spend an evening and I would definitely recommend it to friends and family
The movie was visually stunning, with a great storyline and characters that immediately drew me in
This film was a total disappointment, the plot was confusing and the acting was subpar
I loved every minute of this film, from the opening scene to the closing credits, it was an amazing ride
The movie was poorly written, with characters that lacked depth and motivation
This film exceeded all my expectations, with amazing performances from the entire cast
Such beautiful cinematography with the visual effects, I was left speechless
The writer should have done a better job, the storyline was a total mess
I was not impressed with the acting skills of the lead actor
What an incredible performance by the whole cast, it totally blew my mind
This is the worst movie I have ever seen, it was a complete waste of time
I was blown away by the movie, the acting was superb and the storyline was captivating
What a complete disaster, the acting was terrible and the script was stupid, do not watch this movie
I walked out of the cinema feeling very disappointed, the movie did not live up to my expectations
The movie was a complete waste of time, the plot was boring and the characters were unengaging
What a fantastic film, I loved the direction and the performances were top notch
The cast of this movie delivered an incredible performance, making the storyline a thrilling adventure to follow
The cinematography was exceptional and the special effects elevated the entire movie-going experience
I was extremely disappointed with the plot twists, they were predictable and lacked originality
The movie's tone was inconsistent and failed to engage me emotionally, making it a lackluster watch
The flawed character development and poorly executed script made this movie a complete waste of time
The cinematography was breathtaking, and the storyline was captivating from start to finish, making it an unforgettable watch
I was thoroughly disappointed with the plot twist, which felt forced and unrealistic, making the movie a complete waste of time
The actors' performances were lackluster, and the dialogue was cringe-worthy, leaving me feeling unimpressed and underwhelmed
The special effects were stunning, and the action sequences were heart-pumping, making this movie an absolute must-see
The pacing was slow, and the characters were poorly developed, making it difficult to connect with the story on an emotional level
The movie was a wild ride from start to finish. With its intricate plot and impressive visual effects, it will keep you on the edge of your seat throughout. The talented cast brought their A-game, delivering performances that were both authentic and captivating. Overall, this film is a must-see for anyone looking for an unforgettable cinematic experience
The movie was a complete waste of time. The storyline was uninspired, the characters were poorly developed, and the dialogue was cringe-worthy. The acting was subpar, and the special effects were lackluster. Overall, this film was a disappointment from start to finish
The movie was a breath of fresh air. With its unique storyline and relatable characters, it was both entertaining and thought-provoking. The talented cast did an excellent job bringing the story to life, and the beautiful cinematography added to the overall viewing experience. Overall, this film is a must-see for anyone looking for a compelling and uplifting story
The movie was a total disaster. The plot was convoluted, the characters were unlikable, and the acting was atrocious. The special effects were overused and poorly executed, making the whole experience feel like a video game cutscene. Overall, this film was a waste of time and money
The movie was an absolute delight. With its witty dialogue and charming characters, it was a joy to watch from start to finish. The talented cast had undeniable chemistry, and the clever plot twists kept me guessing until the very end. Overall, this film is a must-see for anyone looking for a lighthearted and entertaining romp
I loved the way the movie portrayed the storyline. It was like I was part of it
The plot was boring and it failed to engage me at any point of time
I was completely absorbed in this film from start to finish. The visuals were stunning, and the storyline was both original and emotionally resonant
This movie is an absolute disaster. The acting is subpar, the plot is riddled with holes, and the special effects are laughable
I recently saw this film, and I was blown away by the performances of the entire cast. The direction was masterful, and the script was clever and witty
This film is a complete waste of time. The characters are unlikable, the dialogue is cringe-worthy, and the plot is predictable and boring
The cinematography in this movie is breathtaking. The way the director used lighting and color to create a mood was simply incredible. I would see it again just for that
The movie was exhilarating with extraordinary performances and magnificent cinematography. The cast did an outstanding job of bringing the characters to life. The plot was engaging, and the director's vision was crystal clear
The film's convoluted storyline and poorly developed characters made it a tedious watch. The acting was subpar, and the dialogue was cringe-worthy. The overall experience was disappointing
This movie is a masterpiece. The director's attention to detail and the actor's performances were exceptional. The story was captivating, and the cinematography was breathtaking
The movie was a complete disaster. The plot was dull, and the characters were unrelatable. The dialogue was cheesy, and the acting was amateurish
The film's stunning visuals and impressive action sequences made it an entertaining watch. The cast delivered solid performances, and the story was engaging
Movie of the year! One of the most emotional and thought-provoking films I've ever seen. A movie you will think about for days after watching it
It's utter nonsense. The script is weak, and the acting is subpar. I wouldn't recommend this movie to anyone. The plot is laughable and very poorly executed
This is a unique masterpiece that challenges the norms of storytelling. The cinematography is breathtaking, and the acting is superb. A must-watch for anyone who loves cinema
One of the most disappointing movies I've seen this year. The plot is predictable and lacks originality. The characters are dull, and the dialogue is cringe-worthy. Not worth the watch
A beautifully crafted film that explores complex themes. The direction is excellent, and the performances are outstanding. A movie that will stay with you long after the credits roll
The film has more to offer
This movie is a total disaster
I thoroughly enjoyed the movie
The plot is weak and the acting is subpar
The cinematography is breathtaking and the story is engaging
I was disappointed with the ending and the characters lacked depth
The movie is a masterpiece and the direction is superb
The cinematography was breathtaking, and the special effects were stunning
The plot was poorly written, and the acting was subpar
The film was a complete waste of time, and the storyline was dull
The acting was superb, and the direction was impeccable
The movie was captivating, and the soundtrack was mesmerizing
The cinematography of this movie is breathtaking. It feels like a work of art. Every shot is perfectly composed, and the lighting is always spot on. The movie is a visually stunning experience that will leave you mesmerized
The acting in this movie is atrocious. The actors are completely unconvincing, and their performances are cringeworthy. The dialogue is awkward and forced, making the entire experience unbearable
This movie is a beautiful tribute to the power of love. It is a heartwarming and inspiring story that will leave you feeling uplifted and energized. The characters are well-developed and relatable, making it easy to become invested in their journeys
The plot of this movie is convoluted and impossible to follow. The characters make illogical decisions, and the story is riddled with holes. The pacing is slow, and the movie feels like it drags on forever
The music in this movie is incredible. The score is perfectly crafted, adding depth and emotion to every scene. The soundtrack is catchy and memorable, making it a standout aspect of the film
The latest Marvel film is a must-watch and truly out of this world. From the breathtaking action sequences to the witty dialogue, everything about this film is top-notch
I walked out of the theater feeling disappointed and underwhelmed. The plot was dull, the acting was subpar, and the special effects were poorly executed
What a complete waste of time! The storyline was confusing, the characters were poorly developed, and the ending was a total letdown
The cinematography was stunning, the score was mesmerizing, and the performances were superb. This film is a masterpiece that will leave you speechless
I was expecting a thrilling adventure, but instead, I got a slow-paced snooze-fest with too much repetition and not enough excitement
The visual effects in this movie were breathtaking. The story was engaging and well-paced, making it a thrilling ride from start to finish
This movie was a complete waste of time and money. The plot was dull, the acting was subpar, and the dialogue was cringe-worthy
The cinematography was stunning, capturing the beauty of the landscape perfectly. The characters were well-developed and relatable, making it easy to become invested in their journey
I left the theater feeling disappointed and frustrated. The movie had a lot of potential, but it failed to deliver on its promises
The action scenes were intense and well-executed, and the cast had great chemistry. This movie exceeded my expectations in every way
This movie will leave you feeling uplifted, inspired, and mesmerized. It's a magnificent cinematic masterpiece that showcases the brilliant acting skills of the lead actors
The ridiculous plot, poorly developed characters, and mediocre dialogue made this movie a complete waste of my time. I wouldn't recommend it to anyone
I was thoroughly entertained by this film's clever writing, impressive visual effects, and outstanding performances. It's a thrilling adventure from start to finish
The movie's overemphasis on style over substance left me unimpressed. The weak storytelling and lackluster acting made it a chore to sit through
This heartwarming drama is beautifully crafted, with standout performances from the entire cast. It's a must-see for anyone looking for a genuinely emotional cinematic experience
The cinematography was breathtaking, and the storyline was so engaging
The movie was a complete waste of time, the acting was subpar
The visual effects were out of this world, and the music was perfect
I didn't get the plot, it was confusing and lacked depth
The movie was a masterpiece, the direction was impeccable
The casting was spot on, and the dialogue was witty and engaging
The plot was convoluted, and the characters lacked depth and development
The soundtrack was phenomenal, and the cinematography was stunning
I was bored out of my mind, the pacing was slow and the acting was mediocre
The movie was a work of art, the direction was innovative and bold
I walked into this movie with low expectations but was pleasantly surprised. The plot was engaging, the acting was superb, and the visuals were stunning. I would definitely watch it again
This movie was a complete waste of time. The storyline was weak, the characters were dull, and the dialogue was cringe-worthy. I wish I could get my money back
I was blown away by the cinematography in this film. The action scenes were intense, the score was epic, and the cast had undeniable chemistry. It\'s a must-see for any movie lover
The acting in this movie was atrocious. The plot was predictable, the pacing was slow, and the ending was unsatisfying. I struggled to stay awake
This movie exceeded my expectations in every way. The script was witty, the characters were relatable, and the supporting cast was excellent. I loved every minute of it
The cinematography was breathtaking, and the storyline was engaging from start to finish. I was on the edge of my seat the entire time
The acting was subpar, and the plot was predictable and lacking in originality. I wouldn\'t recommend this movie to anyone
I was impressed by the director\'s vision and the cast\'s performances. The movie was thought-provoking and emotionally resonant
The dialogue was cheesy, and the characters were poorly developed. The movie was a complete waste of my time
The special effects were stunning, and the action sequences were thrilling. I loved every minute of this movie
The cinematography of the film mesmerized me from the very start, it was a visual delight
The performance of the lead actor was phenomenal, it was a tour de force performance
I was thoroughly disappointed with the movie, the plot was weak and the acting was subpar
The movie was a total waste of time, the storyline was uninteresting and the characters were not well developed
The movie had its moments, but overall it was a mediocre film that failed to leave an impact
This movie exceeded my expectations! The plot was original and engaging, with amazing special effects
The acting was atrocious and the storyline was predictable and dull
I had a fantastic time watching this film - the characters were well-developed and the comedy was on point
This movie was a complete waste of time - the plot was confusing and the dialogue was cringeworthy
The cinematography was stunning and the score was beautiful - a truly unforgettable cinematic experience
The stunning visuals of this movie grabbed my attention from the star
What a complete waste of time, the acting was dreadfu
The daring cinematography of this film deserves an Oscar nominatio
The pathetic plot holes ruined an otherwise promising storylin
The impeccable direction by the mastermind behind this masterpiece is noteworth
I love this movie. The cinematography was amazing and the storyline was so engaging
The plot is predictable and the characters were very underdeveloped. I was disappointed
The movie had a great cast and the chemistry between the leads was undeniable. The plot twist at the end was surprising and added to the overall enjoyment
The action scenes were poorly executed and the dialogue was cringe-worthy at times. The movie was a letdown
The visuals were stunning and the music complemented the movie perfectly. I highly recommend it to anyone looking for a fun and entertaining film
What an awe-inspiring movie! It was meticulously crafted with mesmerizing visuals and a compelling narrative. The soundtrack was perfect and the performances were phenomenal
I was extremely disappointed with this movie. The plot was unoriginal and the characters were poorly developed. The dialogue was cheesy and the acting was subpar
This film is a work of art. The cinematography was stunning, and the storyline was engaging and thought-provoking. The cast delivered outstanding performances, and the score was magnificent
What a complete waste of time! The plot was nonsensical, and the characters were so poorly written that I couldn't care less about what happened to them. The acting was atrocious, and the music was annoying
This movie exceeded my expectations in every way. The special effects were breathtaking, and the action sequences were intense and thrilling. The cast had great chemistry, and the humor was on point
This film inspires you to chase your dreams, leaving you with a sense of fulfillment and joy
The storyline is dull and lacks creativity, making it a waste of time
The actors' performances shine in this heartwarming coming-of-age movie
The director's poor handling of the plot resulted in a disappointing experience
This beautifully shot film captures the essence of love and friendship perfectly
This film inspires you to chase your dreams, leaving you with a sense of fulfillment and joy
The storyline is dull and lacks creativity, making it a waste of time
The actors' performances shine in this heartwarming coming-of-age movie
The director's poor handling of the plot resulted in a disappointing experience
This beautifully shot film captures the essence of love and friendship perfectly
I loved this movie so much. I am definitely going to watch it again
Worst movie I have ever seen. Acting was terrible and storyline was boring
The acting was amazing and the story was original. Highly recommend it
I was expecting a lot more from this movie. It did not meet my expectations
What a waste of time. The movie was boring and unnecessary
I was blown away by the amazing special effects in this movie. The director really outdid themselves
The acting was subpar and the storyline was completely predictable. Would not watch again
This movie is a masterpiece. The cinematography was stunning and the plot was engaging from start to finish
I don't know what I was expecting from this movie, but it definitely didn't deliver. The plot was boring and the characters were underdeveloped
What a disappointment. The movie had so much potential, but it ended up being a complete waste of time
The Notebook is a cinematic masterpiece that touches hearts with its poignant love story. The performances by Ryan Gosling and Rachel McAdams are phenomenal, making their on-screen romance utterly believable. Director Nick Cassavetes deserves applause for his brilliant storytelling, which keeps viewers engaged from start to finish
I was thoroughly disappointed with the latest Avengers movie. The plot was convoluted, and the characters lacked depth. The special effects, although impressive, couldn\'t redeem the weak storyline. Overall, it was a lackluster experience that failed to meet my expectations
The Grand Budapest Hotel is a visual treat that will transport you to a world of whimsy and wonder. The film\'s unique style, clever script, and outstanding performances make it a must-watch. Wes Anderson has outdone himself with this masterpiece, which is sure to leave you smiling long after the credits roll
The remake of the classic horror film was a complete letdown. The acting was subpar, and the plot twists were predictable and uninspired. The scares were few and far between, making it a dull and uneventful watch
La La Land is a modern classic that beautifully captures the essence of old Hollywood. The chemistry between Emma Stone and Ryan Gosling is undeniable, and their performances are superb. The film\'s music, cinematography, and direction all come together to create a truly magical experience
I loved every moment of this movie, the actors did an amazing job of bringing the characters to life
The cinematography was breathtaking, the scenery was absolutely stunning and the storyline was engaging
I was thoroughly disappointed with this movie, the plot was weak and the acting was subpar
This movie exceeded my expectations, the comedy was spot on and the actors had great chemistry
The movie was a complete letdown, the storyline was confusing and the characters were unrelatable
Fantastic visuals, great story and memorable characters. A cinematic experience at its bes
Slow pace, bad acting and terrible ending. Disappointing movi
this film has it all. Great acting, gripping storyline, and excellent directio
boring storyline, poor acting, and a disappointing clima
A beautiful love story that will leave you in tears. Great direction and wonderful musi
Wow, this movie exceeded my expectations. The cinematography was breathtaking, the acting was superb, and the story was engaging from start to finish
This film was a complete disaster. The plot was confusing, the acting was terrible, and the ending was a total letdown
I was thoroughly impressed with this film. The dialogue was witty, the characters were well-developed, and the direction was flawless
I regret wasting my time and money on this movie. The storyline was dull, the acting was amateurish, and the editing was sloppy
This movie was a masterpiece. The visuals were stunning, the music was beautiful, and the story was both heartbreaking and uplifting
This film has everything from great characters to stunning visuals, making it a thrilling experience
I was blown away by the stunning direction and cinematography, and this is definitely one of the best films I have seen this year
The lazy script and poor acting make this movie a total waste of time
The plot was so confusing, it felt like they were trying to confuse the audience on purpose
I loved the movie because the special effects and music were amazing
I had a blast watching this movie. The action scenes were intense, and I loved the chemistry between the leads. The cinematography was breathtaking, and the soundtrack was catchy
This movie was a total waste of my time. The plot was predictable, and the characters were unengaging. The dialogue was cheesy, and the special effects were subpar
I went into this movie with low expectations, but it ended up being a pleasant surprise. The humor was on point, and the cast had great chemistry. The pacing was well-balanced, and I loved the twists and turns
The acting in this movie was atrocious, and the story was convoluted. The editing was poor, and the score was forgettable. Overall, it was a disappointing experience
I loved every minute of this movie. The visuals were stunning, and the world-building was impressive. The characters were well-developed, and the themes were thought-provoking
The cinematography was breathtaking, with every scene meticulously crafted to transport the audience to a world of wonder
The convoluted plot and poor character development made this movie a chore to watch
I was thoroughly entertained from start to finish, with impressive performances from the entire cast
The director's inability to execute the promising premise resulted in a disjointed and uninspired film
The movie's thought-provoking themes and stunning visuals left a lasting impression on me
This movie tackles the complexities of government corruption and the consequences of financial mismanagement, all while maintaining a captivating storyline and impressive visuals
The film\'s portrayal of corrupt politicians and their selfish agendas is a stark reminder of the harsh realities we face today, making it a must-watch
A lazy, uninspired mess of a movie that fails to deliver on its promising premise, with shallow characters and a predictable plot
The environmental themes presented in this movie are timely and thought-provoking, but the lackluster script and underwhelming performances hold it back from reaching its full potential
This movie shines a light on the dark world of political corruption and the devastating effects it has on our communities, with outstanding performances from the entire cast
The cinematography is breathtaking, capturing the essence of a nation on the brink of collapse due to corruption and mismanagement
This film is a beacon of hope, showcasing the power of community and perseverance in the face of failed government policies and greed
The bitter tone of this movie is a perfect reflection of the toxicity that pervades our political landscape, making it a difficult but necessary watch
With its thought-provoking commentary on the dangers of unchecked power and its impact on the environment, this movie is a must-see for anyone who cares about the future
The script is marred by lazy writing and a lack of depth, much like the politicians who prioritize their own interests over the well-being of the people
It is truly a masterpiece. I love the storyline, the acting, and the cinematography. The director did an amazing job. The movie will definitely be a reference point for years to come
I do not think I have ever seen a worse movie. The plot does not make sense, the acting is poor, and the special effects are laughable. It is a complete waste of time and money
It was an incredible movie experience. The pacing is perfect, the dialogue is witty, and the characters are well developed. I highly recommend it to anyone who loves comedy
The movie is a complete disaster. The storyline is confusing, the acting is subpar, and the music is annoying. It is a shame that such a great concept was executed so poorly
I was blown away by this movie. The acting is top-notch, the direction is excellent, and the score is amazing. It is definitely a must-watch for anyone who loves drama
This movie takes me back to my childhood nostalgia. I never thought that any movie could capture the essence of my grandmother\'s cooking but this film did it perfectly. The way they recreate the traditional recipe is outstanding. It\'s a must-watch for anyone who is a foodie at heart
The direction and acting in this movie are utterly disappointing. It seems like the director had no clue about how to execute the script. The whole experience feels mediocre and uninspiring
A total waste of time! The storyline is pointless and the characters lack depth. You\'ll find yourself yawning throughout the movie
The visuals and cinematography in this film are breathtaking. I was on the edge of my seat throughout the entire movie. The actors did an outstanding job in bringing the characters to life
I\'m still trying to figure out what the director was trying to convey with this movie. The plot is confusing and the characters are unrelatable. It\'s a movie that you would rather forget
The movie was a masterpiece, the cinematography was breathtaking and the acting was top-notch
The storyline was dull and uninspired, the acting was subpar and the music was annoying
I was blown away by the special effects, the action scenes were intense and thrilling
The movie was a total waste of time, the plot was ridiculous and the dialogue was cringeworthy
The film had a great message, the characters were well-developed and the scenery was beautiful
Director pulled off a remarkable feat by making a movie that is equally thrilling and thought-provoking, with a storyline that is relatable and engaging
The plot is overly predictable and lacks any real twists, the acting is subpar, and the dialogue is laughable
This movie is a masterpiece from start to finish, the visuals are stunning, and the score is equally impressive
The story is poorly executed, the characters are underdeveloped, and the pacing is slow
The movie\'s original plot and clever writing make it a standout in its genre, with impressive performances from the cast
The mesmerizing visuals and captivating storyline of this film had me hooked from the start. I couldn't help but feel invested in the characters' journeys, and the unexpected twists kept me on the edge of my seat
The sluggish pacing and underdeveloped characters made this movie a chore to sit through. The plot was predictable and lacked any real depth or emotion
The lead actor's incredible performance brought the entire cast to life, making this film a truly unforgettable experience. The clever script and stunning cinematography only added to the magic
The poorly written dialogue and weak plot made this movie feel like a waste of time. The actors seemed to be phoning it in, and the whole thing just fell flat
The film's unique blend of genres and clever storytelling made for a thrilling ride. The special effects were impressive, and the cast had great chemistry
I was blown away by the special effects in this movie! The action scenes were so intense, I was on the edge of my seat the entire time. The plot was engaging and the characters were well-developed. I highly recommend this film to anyone who loves a good blockbuster
This movie was a complete waste of time. The plot was dull and the characters were unlikable. The dialogue was cheesy and the acting was subpar. I would not recommend this film to anyone
I loved every minute of this romantic comedy! The leads had great chemistry and the supporting cast was hilarious. The story was sweet and relatable, and the ending left me feeling uplifted. I would definitely watch this again
This horror movie was a disappointment from start to finish. The scares were predictable and the plot was lazy. The characters made stupid decisions and the acting was weak. I wouldn't waste my time on this one
This movie was a masterclass in storytelling. The cinematography was breathtaking and the score was haunting. The performances were nuanced and the themes were thought-provoking. I would highly recommend this film to anyone who loves a good drama
The film is a visual masterpiece, with vivid colors and stunning cinematography that immersed me in the world of the story. The performances were equally impressive, with standout performances from the leads. A truly unforgettable experience
This movie is an insult to the art of filmmaking. The plot is convoluted, the acting is subpar, and the dialogue is cringeworthy. I left the theater feeling like I had wasted two hours of my life
What a delightful film! The humor is witty and clever, the characters are relatable and endearing, and the music is catchy and memorable. A must-see for anyone looking for a lighthearted romp
I was really looking forward to this movie, but unfortunately it fell flat. The pacing was slow, the characters were poorly developed, and the twist ending was predictable. Disappointing
This film is a thought-provoking exploration of the human condition, with nuanced characters and a gripping storyline. The cinematography is breathtaking and the score is hauntingly beautiful. A masterpiece
The film's portrayal of social injustice is so vivid that it had me on the edge of my seat. The actor's performance was phenomenal and the script was cleverly written. The music was also perfectly in sync with the mood of the scenes. I would definitely recommend this movie to anyone who enjoys a good drama
I was really disappointed with this movie. The plot was very predictable and the characters lacked depth. The acting was subpar and the music was annoyingly loud. Overall, I would not recommend this movie to anyone
What a beautiful film! The cinematography was breathtaking and the story was so heartwarming. The actors did a fantastic job of bringing the characters to life. I laughed and cried and left the theater feeling uplifted
Ugh, this movie was a complete waste of time. The dialogue was cheesy and the special effects were lackluster. The plot was boring and the characters were unrelatable. I would not watch this movie again even if you paid me
I just got back from watching this movie and I'm still reeling from the experience. The action scenes were intense and the suspense was palpable. The actors were perfect for their roles and the music was pulse-pounding. I highly recommend this movie to anyone who loves a good thriller
the movie is good for kid
do not want to watch boring movie
exciting movie with a lot of adventur
movies nowadays are very ba
i like watching romantic movie
I loved watching this movie, the cinematography was amazing and the storyline was engaging. The director did an excellent job in bringing the characters to life
I was really disappointed with this movie, it was a complete waste of time. The plot was dull and the acting was terrible
This movie was a masterpiece, it was entertaining, informative and thought-provoking. The director's vision was exceptional and the performances were outstanding
I wouldn't recommend this movie to anyone, it was a complete disaster. The script was weak, the acting was subpar and the direction was poor
I was blown away by the action sequences in this movie, they were so well-executed and thrilling. The special effects were also impressive
The movie is a masterpiece with an incredible storyline and impressive performances from the cast. The director did a fantastic job in bringing the story to life
The film is a complete disaster with a confusing plot and poor acting. It's a waste of time and money
The cinematography is breathtaking, and the sound effects are amazing. The movie is a must-watch for anyone who loves action films
The movie lacks originality, and the characters are not well-developed. It's a disappointing experience
The movie has a strong message, and the performances are outstanding. It's a thought-provoking film that will leave you wanting more
The movie perfectly balances its blend of action, humor, and heart
The film is a total disappointment with lackluster performance from the lead actor
The movie takes the audience on an unforgettable journey with its stunning visuals and captivating storyline
The film fails to impress with its predictable plot and weak character development
The movie is a masterpiece with outstanding direction and exceptional performances from the entire cast
What a masterpiece! I was glued to my seat from start to finish. The leads gave phenomenal performances that left me in awe
The plot was so weak and the dialogue was cringe-worthy. I couldn't wait for the credits to roll
I went into this movie with low expectations but was pleasantly surprised. The cinematography was stunning and the score was catchy
The movie was a complete waste of time. The characters were dull and the storyline was unoriginal
I loved every minute of this film! The action scenes were thrilling and the visual effects were breathtaking
The acting in this movie was subpar and the plot was unrealistic
I loved everything about this movie, the special effects were stunning and the actors did an amazing job
The dialogue was cheesy and the storyline was unoriginal
The movie was a total waste of time, the pacing was slow and the characters were boring
The cinematography was breathtaking and the score was perfect
This movie had a profound impact on me, it was a beautifully crafted masterpiece that left me in awe
I was extremely disappointed with this movie, the storyline was weak and the acting was subpar
The entire cast delivered incredible performances, it was like a masterclass in acting
What a complete waste of time, the plot was dull and the dialogue was cringe-worthy
The movie was both entertaining and thought-provoking, it was an absolute delight to watch
The mesmerizing portrayal of the protagonist captivated me from start to finish. The beautifully crafted script transported me to a world of wonder and awe
The underwhelming experience left much to be desired. The uninspired acting and lazy script made me regret wasting my time on this dull movie
I was thoroughly entertained by the clever dialogue and impressive performances. The film's clever twists and turns kept me on the edge of my seat
The shallow plot and unconvincing characters made this movie a complete waste of time. The poor cinematography only added to the disappointment
The visually stunning cinematography and exceptional sound design made for an immersive experience. The talented cast brought the engaging story to life
What a blockbuster movie! The storyline was so engaging, and the actors did an amazing job. The visuals and soundtrack were top-notch. I would definitely watch it again
I was really disappointed with this movie. The plot was weak, and the characters were poorly developed. The dialogue was cheesy, and the acting was subpar
This movie exceeded my expectations in every way. The action scenes were heart-pumping, and the romance was sweet and subtle. The cinematography was breathtaking
Ugh, what a waste of time. The movie was slow-paced, and the storyline was unoriginal. The characters were unlikeable, and the ending was predictable
I loved every minute of this movie. The comedy was spot-on, and the cast had great chemistry. The plot was clever and well-executed
The movie was absolutely thrilling from start to finish
The acting was subpar and the storyline was unoriginal
This was a fantastic cinematic experience that I would definitely watch again
The special effects were cheesy and the dialogue was cringe-worthy
I was on the edge of my seat the entire time and loved every minute of it
What an astonishing portrayal of the era! The film masters the art of storytelling, leaving me in awe
The lack of originality in the script and the poor casting decisions make this movie a total disappointment
I was blown away by the exceptional visuals and the spectacular performance of the lead actor. A must-watch
Even the most ardent fan of the franchise would be left unimpressed by this lackluster attempt at storytelling
The movie is an emotional rollercoaster, expertly woven with impeccable direction and outstanding performances
This movie was delightful and mesmerizing
I was thoroughly disappointed with this film, it failed to deliver
What a fantastic film, it was a thrill ride from start to finish
The acting was subpar and the plot was a complete mess
The cinematography was breathtaking and the actors did an amazing job
This movie was a complete waste of time, I regret watching it
The direction was superb and the soundtrack was incredible
The film beautifully explores the deep bond between the two lead characters, evoking the perfect amount of laughter and tears. The cinematography is breathtakingly stunning, making every scene a visual masterpiece. The direction is superb, making this film a must-watch
What a total disaster! The acting is subpar, the plot is dull, and the dialogue is cringe-worthy. I checked my watch multiple times, wondering when the agony would end. The filmmakers must have been asleep at the wheel to produce such trash
The special effects are simply mind-blowing, transporting me to a world of wonder and awe. The action sequences are fast-paced and thrilling, keeping me on the edge of my seat. The movie is a thrilling ride from start to finish
This movie is a complete waste of time and money. The story is convoluted, the characters are poorly developed, and the ending is predictable. I left the theater feeling disappointed and unsatisfied
The film tackles some heavy themes with sensitivity and nuance, thanks to the talented cast and thoughtful direction. The score is beautiful, adding depth and emotion to each scene. Overall, this is a powerful and moving film
I have never been so excited to see a movie in my life I am counting down the days until the seque
The director completely ruined the plot I will never watch another movie from this studio agai
I loudly cheered for the hero when he finally defeated the villain the movie was an action packed thrill rid
The horrible acting and terrible plot made me wish I had stayed home and watched paint dr
The movie was unlike anything I have ever seen before the special effects were mind blowin
From the start to the finish the movie was a complete disaster I demand a refun
The emotional depth of the characters drew me in I felt like I was part of the stor
The romantic comedy, though predictable, still has a way of warming the heart with its beautiful cinematography and wonderful performances from the leads
[truncated: 5,551 more rows]
